## Excess mortality in England and Wales during the first wave of the COVID-19 pandemic

Evangelos Kontopantelis, PhD. Professor in Data Science and Health Services Research<sup>1,2</sup>

Mamas A Mamas, BMBCh DPhil MA FRCP Professor of Cardiology<sup>1,3,4</sup>

John Deanfield BA Hons (Cantab), BChir MB, MRCP, FRCP, BHF Vandervell Chair of Congenital Heart Disease<sup>5</sup>

Miqdad Asaria, PhD, Assistant Professorial Research Fellow<sup>6</sup>

Tim Doran, MD. Professor of Health Policy<sup>7</sup>

1 Division of Informatics, Imaging and Data Science, University of Manchester, Manchester, England

2 NIHR School for Primary Care Research, University of Oxford, Oxford, England

3 Keele Cardiovascular Research Group, Centre for Prognosis Research, Institute for Primary Care and Health Sciences, Keele University, Keele, England

4 Department of Cardiology, Jefferson University, Philadelphia, USA

5 Institute of Cardiovascular Science, University College Hospital, London, England

6 Department of Health Policy, London School of Economics and Political Science, London, England

7 Department of Health Sciences, University of York, England.

## Abstract

### Background

Deaths during the COVID-19 pandemic result directly from infection and exacerbation of other diseases and indirectly from deferment of care for other conditions, and are socially and geographically patterned. We quantified excess mortality in regions of England and Wales during the pandemic, for all causes and for non-COVID-19 associated deaths.

### Methods

Weekly mortality data for 1 Jan 2010 to 1 May 2020 for England and Wales were obtained from the Office of National Statistics. Mean-dispersion negative binomial regressions were used to model death counts based on pre-pandemic trends and exponentiated linear predictions were subtracted from: i) all-cause deaths; and ii) all-cause deaths minus COVID-19 related deaths for the pandemic period (07-13 March to 25 April to 8 May).

### Findings

Between 7 March and 8 May 2020, there were 47,243 (95%CI: 46,671 to 47,815) excess deaths in England and Wales, of which 9,948 (95%CI: 9,376 to 10,520) were not associated with COVID-19. Overall excess mortality rates varied from 49 per 100,000 (95%CI: 49 to 50) in the South West to 102 per 100,000 (95%CI: 102 to 103) in London. Non-COVID-19 associated excess mortality rates ranged from -1 per 100,000 (95%CI: -1 to 0) in Wales (i.e. mortality rates were no higher than expected) to 26 per 100,000 (95%CI: 25 to 26) in the West Midlands.

### Interpretation

The COVID-19 pandemic has had markedly different impacts on the regions of England and Wales, both for deaths directly attributable to COVID-19 infection and for deaths resulting from the national public health response.

### Funding

None

## Introduction

The COVID-19 pandemic began in Hubei Province, China towards the end of 2019, and the first confirmed cases in Britain were recorded on January 31 2020. As of 21 May 2020 there were 158,488 confirmed cases in England and Wales and 33,081 deaths in people testing positive for SARS-CoV-2.<sup>1</sup> In addition to increased risks for men, older age groups,<sup>2</sup> and people with long term conditions such as cardiovascular disease and diabetes, it was clear from the earliest stages of the pandemic that the consequences of the outbreak would be more severe for some social groups, generally those already most affected by health inequalities. In mid-April, deaths involving COVID-19 in England ranged from 25 per 100,000 in the most affluent 10% of areas to 55 per 100,000 in the most deprived 10%, following the same social gradient as pre-pandemic all cause death rates.<sup>3</sup> Similar patterns emerged in Wales. Ethnic minority groups were also disproportionately affected, with mortality rates in for Bangladeshi and Pakistani ethnicity over three times higher than for White, and rates for Black ethnicity over four times higher.<sup>4</sup> To some extent, these variations may reflect baseline health inequalities across society, but social deprivation also appears to increase susceptibility to COVID infection specifically, through factors including overcrowding, working in a key service or agricultural industry, or having serious underlying medical conditions that increase the risk of COVID-related mortality.

The COVID-19 pandemic has also generated geographic patterns of impact that interact in complex ways with social patterns. London, a major international gateway, was the first area to be substantially affected and as of mid-May was the region with the highest number of confirmed cases. However, in terms of the confirmed infection rate, London was quickly overtaken by other regions; by 13 May, COVID-19 rates ranged from 128 per 100,000 in the South West to 348 per 100,000 in the North East,<sup>1</sup> and hospital admission rates remained highest in the northern regions,<sup>5</sup> where baseline health tends to be poorer.<sup>6</sup> In addition to the impact of the virus itself, a second epidemic emerged as a result of the public health response. Many of the excess deaths during the pandemic are not associated with COVID-19 infection,<sup>7</sup> and although this may be partly attributable to underdiagnosis, it raises the possibility that creating emergency capacity in primary and secondary care has compromised essential care. Patients have also avoided healthcare providers out of concern for service pressures or fear of infection, leading to delay of treatment and increases in out-of-hospital events such as cardiac arrest.<sup>8,9</sup>

If these non-COVID-19 excess deaths are also socially and geographically patterned, the consequences for health inequalities could be severe. To begin to address this issue, in this study we aimed to quantify excess mortality in England and Wales during the pandemic, as an aggregate and by region and age group, for all causes and for non-COVID-19 associated deaths.

## Methods

### Data

Weekly mortality data for the whole of England and Wales were obtained from the Office of National Statistics (ONS), covering the period from 1 Jan 2010 to 8 May 2020.<sup>10</sup> All-cause deaths and deaths where the underlying cause was respiratory disease were available for England-Wales as an aggregate, but also by region (former Strategic Health Authority) and age group (under 1, 1-14, 15-44, 45-66, 65-74, 75-84 and 85 or over) for males and females. Respiratory disease deaths excluded deaths at age under 28 days and were obtained using ICD-10 codes J00-J99. For 2020 data, deaths where COVID-19 was mentioned in the death certificate were also reported (ICD10 U07.1 and U07.2), as England-Wales aggregates but also by region and age group. However, respiratory and COVID-19 deaths could be double-counted. Regional counts do not include residents outside England-Wales or those records where the place of residence is missing, while age group counts do not include deaths where age was missing.

Underlying cause of death, as reported in England and Wales, is compatible with WHO recommendations using ICD rules (with small changes in 2011 and 2014), and is obtained from the death certificate. The underlying cause of death is defined by the WHO as the disease or injury that initiated the series of events that led directly to death, or the circumstances of the accident or violence that produced the fatal injury.<sup>11</sup> A condition mentioned in the death certificate may be the main reason or a contributory reason to the cause of death.

### Analyses

Data were imported, cleaned and formatted as a time series in Stata v16. Death counts, overall and by stratum of interest were plotted and the same analysis model was used for each. For the excess mortality modelling, data from week 9 in 2020 (22-28 February), two weeks before the first official COVID-19 related deaths (7-13 March) were set to missing. Mean-dispersion negative binomial regressions were used to model death counts, with the fixed-effect predictors being week (as categorical, to account for seasonality) and time (as continuous, to account for a potential slope). For each model and stratum, the natural logarithm of the annual population estimate was used as offset. We selected negative binomial regression models over Poisson models because of the high variation in the outcome variable. For weeks 11 (7 to 13 March) to 19 (2 to 8 May), the exponentiated linear prediction from each model (and its 95% confidence intervals) were subtracted from: 1) all-cause deaths; and 2) all-cause deaths minus deaths where COVID-19 was mentioned. Excess deaths estimates, in each stratum and overall, were summed across all weeks, with a pooled estimate for the standard error used to obtain the 95% confidence intervals.

## Results

### All-cause excess mortality

During the 9-week period from 7 March 2020 to 8 May 2020, overall excess deaths for England and Wales were 47,243 (95%CI: 46,671 to 47,815) (Table 1). This total includes negative values at the start of the study period, when excess deaths were lower than predicted from historical trends, continuing a pattern of relatively low mortality rates in the first 12 weeks of 2020 (Figure 1). London had the greatest number of excess deaths at 9,219 (95%CI: 9,185 to 9,254), followed by the North West with 6,951 (95%CI: 6,903 to 6,999) and the South East with 6,656 (95%CI: 6,588 to 6,723). The least affected regions were Wales with 1,757 (95%CI: 1,730 to 1,784) and the North East with 2,239 deaths (95%CI: 2,209 to 2,270). The age-groups with the largest numbers of excess deaths were 85 or over with 20,173 (95%CI: 19,975 to 20,370) and 75-84 with 14,414 (95%CI: 14,304 to 14,524). We estimated 7,021 (95%CI: 6,963 to 7,078) excess all-cause deaths for people aged 65-74 and 4,811 (95%CI: 4,768 to 4,853) for people aged 45-64.

All-cause excess mortality per 100,000 population is presented in Table 2, with the average across England and Wales at 79 (95%CI: 78 to 80). The largest mortality ratios were observed in London (102; 95%CI: 102 to 103), the West Midlands (97; 95%CI: 96 to 98) and the North West (94; 95%CI: 93 to 95), and the lowest in the South West (49; 95%CI: 49 to 50) and Wales (55; 95%CI: 55 to 56) (Figure 2). The mortality ratios for people aged 85 or over, 75-84, 65-74 and 45-64 were 1,331 (95%CI: 1,318 to 1,344), 388 (95%CI: 385 to 391), 118 (95%CI: 117 to 117) and 31 (95%CI: 31 to 32), respectively.

Excess all-cause deaths were estimated for all male and female age groups, and were higher for males for all age groups from age 15, with the exception of the 85+ age group. We estimated 9,086 (95%CI: 9,013 to 9,159) excess all-cause deaths for males aged 85 or over, compared to 11,123 for females (95%CI: 10,997 to 11,250). However, males aged 75-84 were estimated to have had 8,540 deaths (95%CI: 8,481 to 8,598), compared to 5,890 (95%CI: 5,836 to 5,944) for females, and males aged 65-74 were estimated to have had 4,662 deaths (95%CI: 4,628 to 4,696), compared to 2,360 (95%CI: 2,334 to 2,386) for females.

Mortality ratios per 100,000 population more clearly demonstrated the higher excess deaths in males. For males aged 85 or over, 75-84, 65-74 and 45-64, these were estimated at 1,602 (95%CI: 1,589 to 1,615), 503 (95%CI: 500 to 507), 162 (95%CI: 161 to 164) and 42 (95%CI: 41 to 42). Female estimates for the respective age groups were 1,173 (95%CI: 1,160 to 1,186), 291 (95%CI: 289 to 294), 76 (95%CI: 75 to 77) and 21 (95%CI: 21 to 22).

### All-cause excess mortality not attributed to COVID-19

From 7 March 2020 to 8 May 2020, overall excess deaths for England and Wales, excluding cases where COVID-19 was mentioned in the death certificate, were 9,948 (95%CI: 9,376 to 10,520) (Table 3). It is important to note that until the week ending 1 May 2020, the total was 11,141 (95%CI: 10,567 to 11,714), but there was a large drop into negative values in the last week of analysis (2 May to 8 May 2020). London was again the worst hit region in terms of number of excess deaths with 1,814 (95%CI: 1,780 to 1,849), followed by the South East with 1,570 (95%CI: 1,502 to 1,637) and the West Midlands with 1,531 (95%CI: 1,483 to 1,579) (Figure 3). The least affected regions were again Wales with -18 (95%CI: -45 to 9) and the North East with 320 (95%CI: 290 to 351). The age-groups with the largest numbers of excess deaths were 85 or over with 5,124 (95%CI: 4,926 to 5,321) and 75-84 with 2,207 (95%CI: 2,097 to 2,317). Estimated

excess deaths for people aged 65-74 and 45-64 were 1,249 (95%CI: 1,191 to 1,306) and 969 (95%CI: 926 to 1,011), respectively.

Non-COVID-19 excess mortality per 100,000 population is presented in Table 4, with the average across England and Wales at 17 (95%CI: 16 to 18). The largest mortality ratios were in the West Midlands (26; 95%CI: 25 to 26), followed by the East of England (21; 95%CI: 20 to 21), the North West (20; 95%CI: 19 to 21) and London (20; 95%CI: 20 to 21) (Figure 4). Ratios for people aged 85 or over, 75-84, 65-74 and 45-64 were 338 (95%CI: 325 to 351), 59 (95%CI: 56 to 62), 21 (95%CI: 20 to 22) and 6 (95%CI: 6 to 7), respectively.

Excess all-cause deaths, excluding deaths where COVID-19 was documented cause of death on the death certificate, were higher for males for all age groups from age 45, with the exception of the 85+ age group. We estimated 3,250 (95%CI: 3,124 to 3,377) excess deaths for females aged 85 or over, compared to 1,910 for males (95%CI: 1,837 to 1,983). However, males were estimated to have had 1,214 (95%CI: 1,155 to 1,272), 863 (95%CI: 829 to 897) and 614 (95%CI: 587 to 640) excess deaths for age groups 75-84, 65-74 and 45-64, respectively. By comparison, females were estimated to have had 1,009 (95%CI: 955 to 1,063), 387 (95%CI: 361 to 413) and 352 (95%CI: 334 to 370) excess deaths for age groups 75-84, 65-75 and 45-64, respectively. Males also had higher non-COVID-19 mortality ratios per 100,000 population, with 337 (95%CI: 324 to 350) for males aged 85 or over, 72 (95%CI: 68 to 75) for males aged 75-84, and 30 (95%CI: 29 to 31) for males aged 65-74. Female estimates for the respective age groups were 343 (95%CI: 329 to 356), 50 (95%CI: 47 to 53) and 12 (95%CI: 12 to 13).

### Supplementary files

Three dynamic supplementary files are also provided, produced in LaTeX for almost complete automation, which will be updated weekly. The first appendix reports absolute numbers, the second reports ratios over 100,000 population, for each stratum of interest. For the overall England-Wales aggregate, each region and each age group (sex specific or not), we report the following time-series: mortality, mortality and predictions from the negative binomial regression model, all-cause excess deaths and all-cause excess deaths where COVID-19 is not mentioned in the death certificate. All these time series are reported from the 1st week of 2010, the 1st week of 2019 and the 1st week of 2020 (to allow for a more complete overview). The third appendix reports the graphs presented in the paper, time-series of excess deaths by region, but also time series of excess deaths by age group and sex.

## Discussion

Our models, based on historical mortality trends, illustrate the scale of the COVID-19 pandemic and its direct and indirect impacts on population health. Over the first nine weeks, there were 47,243 excess deaths (95%CI: 46,617 to 47,815) in England and Wales, of which over a fifth (9,948, 95%CI: 9,376 to 10,520) were not directly attributed to COVID-19 infection. This likely underestimates the impact of the virus, as prior to the pandemic mortality rates for 2020 were relatively low, particularly compared with years with high influenza activity (2015 and 2018). Excess death rates started to increase after 20 March and peaked between 17 and 24 April, with the highest peaks (up to 26 deaths per 100,000) in London, the West Midlands and the North West and the lowest peaks in the East Midlands, Wales and the South West. Non-COVID-19 associated deaths followed similar general patterns.

## Strengths and Limitations

This analysis of national data for England and Wales provides a comprehensive picture of excess deaths due to COVID-19, either directly or indirectly, based on diagnosis by clinicians closely involved with patient care. This allows for clinical judgment of the contribution of pandemic coronavirus to death, and does not only rely on a positive test for COVID-19 infection.

However, there are several important limitations. Although counts of deaths are likely to be accurate, cause of death information is less reliable, as it is reliant on accurate diagnosis and recording by clinicians dealing with exceptional circumstances. ONS reports of COVID-19 related deaths are based on clinical judgments, which in some cases will have been made without positive PCR or antibody testing. Although this confers some advantages compared to solely relying on the presence of a positive test, particularly when the sensitivity of these tests varies between 60-80%, unexpected deaths in elderly multimorbid patients or in those with respiratory symptoms may be misattributed to COVID-19. We controlled for annual population size, while our analyses are weekly, since changes in the population structure are small and gradual and not available on a weekly basis. Data for the latest weeks are provisional, subject to updates in later ONS releases, and the ONS reports the date of registration, rather than date of death, resulting in fluctuations in counts during certain periods (for example, over Easter). Finally, in assessing the unintended consequences of the public health response, it is important to note that we estimated net excess deaths. We do not know how many deaths have been avoided by adopting public health social isolation measures, either through reducing exposure to COVID-19 itself or through spill-over benefits such as reduced road traffic fatalities. Prediction models estimated that mortality rates due to COVID-19 infection, in the absence of mitigation, would reach 3,000 deaths per day in England & Wales by the end of May 2020, and over 460,000 deaths in total by August,<sup>12</sup> a much higher burden of death than observed in this study for both COVID-19 and non-COVID-19 related mortality.

## Findings

Around a quarter of excess deaths during the study period did not have a diagnosis of COVID-19 infection recorded on the death certificate. This may be partly attributable to missed diagnoses, for example where testing did not occur, there was a false negative result or infection did not produce noticeable symptoms. The risk of missed diagnosis is likely to have reduced over time, as capacity for testing has increased, the tests have become more accurate and clinicians were encouraged to record suspected COVID-19 infection on death certificates.<sup>13</sup> This may even have resulted in bias in the opposite direction, with deaths

misattributed to COVID-19 infection later in the outbreak, which may partly explain the negative values for non-COVID-19 excess deaths in the week ending 8 May. Nevertheless, our results suggest that focusing the health service and wider society on managing a single disease has had unintended consequences. Creating capacity within the health system to manage anticipated demand from patients infected with COVID-19 necessitated the cessation of ‘non-essential’ activity - in reality, non-urgent activity. In addition to reduced supply, there was a simultaneous reduction in demand from patients seeking to protect health services and avoid exposure. As a result, attendances in A&E departments in England in April 2020 were 57% lower than in 2019 and emergency hospital admissions were 39% lower,<sup>14</sup> while access to health services for people with pre-existing conditions was 20% lower during the COVID-19 peak period.<sup>15</sup> Non-attendance may have serious immediate consequences, with a reduction in high acuity attendances requiring urgent admission such as acute coronary syndromes, strokes and heart failure. The focus on protecting the NHS also exposed those dependent on the social care sector,<sup>16</sup> particularly high-risk residents living in close proximity in care homes. Both COVID-19 and non-COVID-19 deaths rose rapidly in these settings,<sup>17</sup> accounting for over half of all excess deaths in England and Wales.

The observed differences in impacts of COVID-19 across the regions of England and Wales have a range of potential causes that will need to be explored in further detail. COVID-19 spreads through close human contact, and high rates of infection quickly developed in the major conurbations, particularly London, Birmingham (West Midlands), Liverpool and Manchester (North West), and this is reflected in regional excess mortality rates. Following exposure, there are several key risk factors for adverse outcomes, including age, ethnicity, multi-morbidity (particularly diabetes, cardiovascular disease, and conditions and treatments suppressing the immune system), smoking and obesity. However, with respect to age, the regions with the lowest – rather than the highest – proportion of the population over the age of 65 (London, the West Midlands and the North West) had the highest rates of excess deaths, although older populations within the regions were most affected. London is an outlier in terms of age, with only 12.1% of the population over age 65 and 1.7% over age 85 compared to 18.5% and 2.5% respectively for England and Wales, but it was disproportionately affected by the pandemic in its early stages. With respect to ethnicity, Wales and the North East have the smallest BAME populations and London by far the highest.<sup>18</sup> Other key risk factors, including obesity, smoking and multimorbidity are strongly associated with deprivation,<sup>19 20</sup> the highest concentrations of which are found in the North East, North West,<sup>21</sup> and the south of Wales.<sup>22</sup> Regional rates of excess deaths were not clearly associated with levels of deprivation, although within regions more deprived communities have been disproportionately affected,<sup>2</sup> reflecting higher prevalence of risk factors, ability to comply with social distancing requirements and exposure to air pollution.<sup>23</sup>

To date, trends in non-COVID-19 related excess deaths during the pandemic have followed the same general pattern as all cause excess deaths, with some English regions and Wales appearing to be relatively unaffected. This may reflect factors such as differences in: levels of testing, thresholds for diagnosis, sociodemographic structures, levels of rurality, service engagement by older patients, and capacities within local health and social care systems. As the pandemic develops, the balance between COVID-19 and non-COVID-19 related deaths is likely to change, and different patterns may develop across the regions. These patterns will need to be monitored as the longer-term impacts of the pandemic and the public health response emerge.



## Conclusion

Short term trends in excess deaths during the COVID-19 pandemic have not followed typical regional patterns for premature mortality in England and Wales, particularly for deaths not directly attributable to the virus. Some regions where mortality rates tend to be low, for example the South East and East, have had relatively high rates of non-COVID-19 related deaths. Predicting longer-term impacts requires caution, but given the sudden and comprehensive re-prioritisation of services, it is likely that a second wave of non-COVID-19 related need is currently building in the community. When this breaks it could overwhelm parts of the NHS, and communities with high baseline levels or morbidity are likely to be hit harder than others and this should be recognised in planning post-pandemic health and social care services.<sup>24</sup> The national response will need to address local variations in viral activity, in health and social care provision, and in pandemic preparedness, including management of 'routine' care during a national emergency. It will also need to address long-standing structural disadvantages that expose parts of the country to avoidable harm from both chronic and acute infectious disease.

## References

1. GOV.UK. Coronavirus (COVID-19) in the UK. 2020. <https://coronavirus.data.gov.uk/>
2. Office for National Statistics. Coronavirus (COVID-19) roundup. 2020. <https://www.ons.gov.uk/peoplepopulationandcommunity/healthandsocialcare/conditionsanddiseases/articles/coronaviruscovid19roundup/2020-03-26#coviddeaths>
3. Office for National Statistics. Deaths involving COVID-19 by local area and socioeconomic deprivation: deaths occurring between 1 March and 17 April 2020. 2020. <https://www.ons.gov.uk/peoplepopulationandcommunity/birthsdeathsandmarriages/deaths/bulletins/deathsinvolvingcovid19bylocalareasanddeprivation/deathsoccurringbetween1marchand17april>
4. Office for National Statistics. Coronavirus (COVID-19) related deaths by ethnic group, England and Wales: 2 March 2020 to 10 April 2020. 2020. <https://www.ons.gov.uk/peoplepopulationandcommunity/birthsdeathsandmarriages/deaths/articles/coronavirusrelateddeathsbyethnicgroupenglandandwales/2march2020to10april2020>
5. West D. Virus persisting at higher rate in north of England. 12/5/2020. <https://www.hsj.co.uk/coronavirus/exclusive-virus-persisting-at-higher-rate-in-north-of-england/7027621.article>
6. Buchan IE, Kontopantelis E, Sperrin M, Chandola T, Doran T. North-South disparities in English mortality 1965-2015: longitudinal population study. *J Epidemiol Community Health* 2017;71:928-36.
7. Griffin S. Covid-19: “Staggering number” of extra deaths in community is not explained by covid-19. *BMJ* 2020;369:m1931.
8. Colivicchi F, Di Fusco SA, Magnanti M, Cipriani M, Imperoli G. The impact of the COVID-19 pandemic and Italian lockdown measures on clinical presentation and management of acute heart failure. *J Card Fail* 2020.
9. Baldi E, Sechi GM, Mare C, Canevari F, Brancaglione A, Primi R, et al. Out-of-Hospital Cardiac Arrest during the Covid-19 Outbreak in Italy. *N Engl J Med* 2020.
10. Office for National Statistics. Deaths registered weekly in England and Wales, provisional. 2020. <https://www.ons.gov.uk/peoplepopulationandcommunity/birthsdeathsandmarriages/deaths/datasets/weeklyprovisionalfiguresondeathsregisteredinenglandandwales>
11. Office for National Statistics. User guide to mortality statistics. 2020. <https://www.ons.gov.uk/peoplepopulationandcommunity/birthsdeathsandmarriages/deaths/methodologies/userguidetomortalitystatisticsjuly2017>
12. Ferguson N, Laydon D, Nedjati Gilani G, Imai N, Ainslie K, Baguelin M, et al. Report 9: Impact of non-pharmaceutical interventions (NPIs) to reduce COVID19 mortality and healthcare demand. 2020.
13. Spiegelhalter D. COVID and ‘excess deaths’ in the week ending April 10th. 2020. <https://medium.com/wintoncentre/covid-and-excess-deaths-in-the-week-ending-april-10th-20ca7d355ec4>
14. NHS England. A&E Attendances and Emergency Admissions 2020-21. 2020. <https://www.england.nhs.uk/statistics/statistical-work-areas/ae-waiting-times-and-activity/ae-attendances-and-emergency-admissions-2020-21/>
15. Charlesworth A, Watt T, Thorlby R. Early insight into the impacts of COVID-19 on care for people with long-term conditions.: The Health Foundation, 2020.
16. Freedman L. Strategy for a Pandemic: The UK and COVID-19. *Survival* 2020;62:25-76.
17. Office for National Statistics. Deaths involving COVID-19 in the care sector, England and Wales. 2020. <https://www.ons.gov.uk/peoplepopulationandcommunity/birthsdeathsandmarriages/deaths/datasets/deathsinvolvingcovid19inthecaresectorenglandandwales>
18. GOV.UK. Regional ethnic diversity. 2020. <https://www.ethnicity-facts-figures.service.gov.uk/uk-population-by-ethnicity/national-and-regional-populations/regional-ethnic-diversity/1.5>
19. NHS Digital. Health Survey for England, 2018. 2020. <https://digital.nhs.uk/data-and-information/publications/statistical/health-survey-for-england/2018>

20. Barnett K, Mercer SW, Norbury M, Watt G, Wyke S, Guthrie B. Epidemiology of multimorbidity and implications for health care, research, and medical education: a cross-sectional study. *Lancet* 2012;380:37-43.
21. Kontopantelis E, Mamas MA, van Marwijk H, Ryan AM, Buchan IE, Ashcroft DM, et al. Geographical epidemiology of health and overall deprivation in England, its changes and persistence from 2004 to 2015: a longitudinal spatial population study. *J Epidemiol Community Health* 2018;72:140-47.
22. GOV.WALES. Welsh Index of Multiple Deprivation (full Index update with ranks): 2019. 2020. <https://gov.wales/welsh-index-multiple-deprivation-full-index-update-ranks-2019>
23. Wu X, Nethery RC, Sabath BM, Braun D, Dominici F. Exposure to air pollution and COVID-19 mortality in the United States. *medRxiv* 2020.
24. Murray R, Edwards N, Dixon J, (on behalf of the King's Fund NTaTHF. Delivering core NHS and care services during the Covid-19 pandemic and beyond: Letter to the Commons Health and Social Care Select Committee. 14/5/2020. <https://www.kingsfund.org.uk/publications/letter-to-health-and-social-care-select-committee-covid-19>

## Tables

Table 1: Excess all-cause deaths from negative binomial regression model, 22/2/2020 to 8/5/2020

|                    | Week ending        |                    |                   |                     |                     |                        |                        |                     |                     |      | Total                  |
|--------------------|--------------------|--------------------|-------------------|---------------------|---------------------|------------------------|------------------------|---------------------|---------------------|------|------------------------|
|                    | 13/3*              | 20/3               | 27/3              | 3/4                 | 10/4                | 17/4                   | 24/4                   | 1/5                 | 8/5                 | 15/5 |                        |
| England            | -305<br>(-782,152) | -274<br>(-690,126) | 914<br>(571,1245) | 5761<br>(5226,6270) | 7540<br>(6752,8276) | 11654<br>(10766,12474) | 11385<br>(10920,11831) | 7541<br>(7064,7997) | 2738<br>(2176,3269) | .    | 47243<br>(46671,47815) |
| <i>Regions†</i>    |                    |                    |                   |                     |                     |                        |                        |                     |                     |      |                        |
| North East         | 15<br>(-7,35)      | -32<br>(-50,-14)   | 13<br>(-12,37)    | 219<br>(193,244)    | 286<br>(244,326)    | 604<br>(560,645)       | 542<br>(510,572)       | 365<br>(337,392)    | 237<br>(215,259)    | .    | 2239<br>(2209,2270)    |
| North West         | -25<br>(-92,40)    | -2<br>(-53,46)     | 160<br>(115,203)  | 709<br>(636,779)    | 1110<br>(1011,1202) | 1766<br>(1663,1862)    | 1696<br>(1638,1752)    | 1098<br>(1047,1147) | 473<br>(403,538)    | .    | 6951<br>(6903,6999)    |
| Yorkshire & Humber | -58<br>(-94,-23)   | -71<br>(-116,-28)  | -6<br>(-47,34)    | 412<br>(345,475)    | 435<br>(360,506)    | 934<br>(860,1003)      | 1053<br>(1011,1093)    | 827<br>(777,874)    | 350<br>(298,400)    | .    | 3886<br>(3849,3923)    |
| East Midlands      | -65<br>(-109,-22)  | -1<br>(-49,45)     | 36<br>(6,66)      | 332<br>(296,366)    | 525<br>(459,586)    | 707<br>(622,785)       | 798<br>(768,827)       | 529<br>(477,577)    | 221<br>(162,276)    | .    | 3096<br>(3060,3131)    |
| West Midlands      | 2<br>(-61,61)      | 3<br>(-60,62)      | -4<br>(-39,31)    | 705<br>(639,767)    | 1045<br>(944,1138)  | 1410<br>(1308,1504)    | 1402<br>(1336,1464)    | 887<br>(826,945)    | 329<br>(272,384)    | .    | 5794<br>(5746,5842)    |
| East               | -17<br>(-66,31)    | -137<br>(-201,-77) | 69<br>(24,113)    | 548<br>(492,602)    | 773<br>(680,860)    | 1277<br>(1171,1373)    | 1141<br>(1080,1200)    | 859<br>(809,907)    | 237<br>(165,305)    | .    | 4801<br>(4755,4847)    |
| London             | -74<br>(-109,-40)  | 15<br>(-31,59)     | 353<br>(297,406)  | 1527<br>(1474,1578) | 1832<br>(1767,1894) | 2315<br>(2240,2386)    | 1814<br>(1774,1853)    | 1026<br>(980,1069)  | 320<br>(275,362)    | .    | 9219<br>(9185,9254)    |
| South East         | 17<br>(-66,97)     | -30<br>(-87,24)    | 257<br>(195,316)  | 678<br>(595,758)    | 916<br>(788,1036)   | 1451<br>(1298,1590)    | 1696<br>(1601,1786)    | 1258<br>(1164,1347) | 343<br>(230,449)    | .    | 6656<br>(6588,6723)    |
| South West         | -62<br>(-140,10)   | -35<br>(-85,13)    | -12<br>(-49,25)   | 399<br>(318,474)    | 393<br>(292,486)    | 700<br>(584,806)       | 791<br>(732,848)       | 422<br>(363,477)    | 153<br>(78,224)     | .    | 2794<br>(2743,2845)    |
| Wales              | -43<br>(-100,9)    | 22<br>(-12,55)     | 62<br>(32,90)     | 235<br>(196,272)    | 228<br>(179,274)    | 498<br>(447,545)       | 437<br>(408,465)       | 263<br>(234,290)    | 67<br>(32,100)      | .    | 1757<br>(1730,1784)    |
| <i>Age groups†</i> |                    |                    |                   |                     |                     |                        |                        |                     |                     |      |                        |
| All <1             | 6<br>(2,10)        | -5<br>(-9,-2)      | 3<br>(-4,8)       | 5<br>(1,8)          | -10<br>(-16,-5)     | 1<br>(-4,5)            | 8<br>(2,13)            | 2<br>(0,5)          | -16<br>(-23,-10)    | .    | 8<br>(5,11)            |
| All 01-14          | 3<br>(-1,6)        | -7<br>(-11,-4)     | -5<br>(-8,-3)     | 4<br>(2,5)          | -6<br>(-8,-4)       | -4<br>(-7,-3)          | -5<br>(-7,-3)          | -7<br>(-9,-5)       | 3<br>(1,4)          | .    | -25<br>(-26,-23)       |
| All 15-44          | 21<br>(7,35)       | -9<br>(-22,4)      | 21<br>(5,36)      | 14<br>(-3,30)       | 45<br>(27,61)       | 74<br>(53,92)          | 114<br>(96,131)        | 49<br>(27,69)       | -38<br>(-66,-14)    | .    | 284<br>(271,297)       |
| All 45-64          | 46<br>(20,72)      | 13<br>(-20,46)     | 138<br>(91,183)   | 656<br>(594,715)    | 875<br>(802,944)    | 1066<br>(974,1151)     | 1065<br>(1007,1120)    | 685<br>(615,751)    | 220<br>(137,296)    | .    | 4811<br>(4768,4853)    |
| All 65-74          | -68<br>(-133,-5)   | 1<br>(-53,53)      | 123<br>(62,182)   | 975<br>(869,1074)   | 1091<br>(977,1199)  | 1610<br>(1471,1738)    | 1463<br>(1396,1528)    | 924<br>(847,998)    | 330<br>(234,421)    | .    | 7021<br>(6963,7078)    |
| All 75-84          | -32                | 22                 | 391               | 2053                | 2574                | 3672                   | 3561                   | 2128                | 743                 | .    | 14414                  |

|               | Week ending |            |           |             |             |             |             |             |             |       | Total         |
|---------------|-------------|------------|-----------|-------------|-------------|-------------|-------------|-------------|-------------|-------|---------------|
|               | 13/3*       | 20/3       | 27/3      | 3/4         | 10/4        | 17/4        | 24/4        | 1/5         | 8/5         | 15/5  |               |
|               | (-162,93)   | (-97,136)  | (291,487) | (1912,2187) | (2352,2781) | (3441,3887) | (3446,3672) | (2001,2250) | (576,900)   | (...) | (14304,14524) |
|               | -303        | -299       | 237       | 2042        | 2956        | 5224        | 5164        |             | 1446        |       |               |
|               | (-600,-23)  | (-549,-62) | (51,416)  | (1777,2292) | (2554,3325) | (4789,5619) | (4923,5393) | 3707        | (1221,1658) | .     | 20173         |
| All 85+       |             |            |           |             |             |             |             | (3482,3920) | )           | (...) | (19975,20370) |
|               | -4          | -3         | 1         | 0           | 1           | -5          | 7           | 4           | -9          | .     | 0             |
| Males <1      | (-7,-2)     | (-7,1)     | (-2,4)    | (-4,2)      | (-4,4)      | (-8,-1)     | (3,11)      | (2,6)       | (-13,-6)    | (...) | (-2,2)        |
|               | -1          | -2         | -5        | -3          | -4          | -4          | 0           | -6          | 5           | .     | -21           |
| Males 01-14   | (-3,1)      | (-5,0)     | (-7,-3)   | (-5,-1)     | (-6,-2)     | (-6,-3)     | (-2,1)      | (-7,-4)     | (3,6)       | (...) | (-22,-19)     |
|               | 13          | -2         | 14        | 9           | 17          | 38          | 63          | 18          | -26         | .     | 143           |
| Males 15-44   | (0,25)      | (-13,8)    | (1,26)    | (-2,20)     | (3,30)      | (22,53)     | (48,77)     | (-1,35)     | (-45,-9)    | (...) | (133,153)     |
|               | 45          | 17         | 68        | 442         | 568         | 666         | 704         | 453         | 166         | .     | 3155          |
| Males 45-64   | (22,67)     | (-5,38)    | (39,95)   | (407,475)   | (525,609)   | (610,718)   | (665,741)   | (410,494)   | (113,215)   | (...) | (3128,3181)   |
|               | -17         | 4          | 121       | 678         | 724         | 1044        | 981         | 595         | 185         | .     | 4662          |
| Males 65-74   | (-52,18)    | (-34,41)   | (94,146)  | (620,732)   | (654,791)   | (966,1117)  | (931,1028)  | (551,637)   | (126,241)   | (...) | (4628,4696)   |
|               | -3          | 26         | 264       | 1271        | 1611        | 2113        | 2023        | 1131        | 424         | .     | 8540          |
| Males 75-84   | (-71,63)    | (-32,82)   | (209,317) | (1193,1346) | (1486,1728) | (1999,2219) | (1954,2090) | (1061,1198) | (338,506)   | (...) | (8481,8598)   |
|               | -51         | -58        | 193       | 1088        | 1540        | 2240        | 2143        | 1420        | 465         | .     | 9086          |
| Males 85+     | (-156,49)   | (-143,22)  | (115,268) | (991,1180)  | (1376,1691) | (2072,2394) | (2066,2217) | (1352,1485) | (369,556)   | (...) | (9013,9159)   |
|               | 10          | -3         | 1         | 5           | -11         | 5           | 1           | -2          | -7          | .     | 8             |
| Females <1    | (7,13)      | (-6,0)     | (-3,5)    | (2,8)       | (-14,-8)    | (3,7)       | (-1,3)      | (-5,0)      | (-11,-3)    | (...) | (6,10)        |
|               | 4           | -5         | 0         | 6           | -2          | 0           | -5          | -1          | -2          | .     | -4            |
| Females 01-14 | (1,6)       | (-7,-3)    | (-2,1)    | (5,8)       | (-3,-1)     | (-2,2)      | (-5,-4)     | (-3,0)      | (-4,-1)     | (...) | (-5,-3)       |
|               | 9           | -7         | 7         | 5           | 27          | 35          | 51          | 31          | -13         | .     | 142           |
| Females 15-44 | (4,13)      | (-13,-2)   | (0,13)    | (-4,13)     | (20,34)     | (27,43)     | (46,56)     | (24,39)     | (-25,-2)    | (...) | (137,147)     |
|               | 1           | -4         | 70        | 214         | 306         | 399         | 361         | 232         | 53          | .     | 1653          |
| Females 45-64 | (-8,11)     | (-18,10)   | (44,95)   | (184,242)   | (272,339)   | (362,434)   | (339,381)   | (202,259)   | (22,83)     | (...) | (1635,1671)   |
|               | -52         | -4         | 2         | 297         | 367         | 565         | 482         | 329         | 146         | .     | 2360          |
| Females 65-74 | (-86,-19)   | (-23,15)   | (-38,39)  | (248,343)   | (321,410)   | (501,624)   | (459,504)   | (294,363)   | (106,183)   | (...) | (2334,2386)   |
|               | -29         | -5         | 126       | 780         | 962         | 1558        | 1536        | 998         | 320         | .     | 5890          |
| Females 75-84 | (-93,33)    | (-71,58)   | (76,174)  | (715,842)   | (862,1055)  | (1439,1667) | (1484,1585) | (934,1059)  | (237,398)   | (...) | (5836,5944)   |
|               | -254        | -243       | 41        | 950         | 1413        | 2980        | 3019        | 2290        | 982         | .     | 47243         |
| Females 85+   | (-452,-69)  | (-410,-85) | (-76,152) | (777,1111)  | (1172,1634) | (2713,3223) | (2854,3174) | (2133,2437) | (851,1107)  | (...) | (46671,47815) |

\*week first COVID-19 related deaths were officially reported

† Sums across age groups and regions do not necessarily correspond to the England-Wales aggregate (due to missing postcodes or ages for some deaths and different models used across population strata)

Table 2: Excess all-cause deaths per 100,000 population from negative binomial regression model, 22/2/2020 to 8/5/2020

|                    | Week ending     |                 |              |                  |                  |                  |                  |                  |               |           | Total               |
|--------------------|-----------------|-----------------|--------------|------------------|------------------|------------------|------------------|------------------|---------------|-----------|---------------------|
|                    | 13/3*           | 20/3            | 27/3         | 3/4              | 10/4             | 17/4             | 24/4             | 1/5              | 8/5           | 15/5      |                     |
| England            | 0<br>(-1,0)     | 0<br>(-1,0)     | 2<br>(1,2)   | 10<br>(9,11)     | 13<br>(11,14)    | 20<br>(18,21)    | 19<br>(18,20)    | 13<br>(12,13)    | 5<br>(4,5)    | .<br>(..) | 79<br>(78,80)       |
| <i>Regions†</i>    |                 |                 |              |                  |                  |                  |                  |                  |               |           |                     |
| North East         | 0<br>(0,1)      | -1<br>(-2,-1)   | 0<br>(-1,1)  | 8<br>(7,9)       | 11<br>(9,12)     | 22<br>(21,24)    | 20<br>(19,21)    | 14<br>(13,15)    | 9<br>(8,10)   | .<br>(..) | 83<br>(82,85)       |
| North West         | 0<br>(-1,0)     | 0<br>(-1,1)     | 2<br>(1,3)   | 10<br>(9,10)     | 15<br>(14,16)    | 24<br>(22,25)    | 23<br>(22,24)    | 15<br>(14,16)    | 6<br>(5,7)    | .<br>(..) | 94<br>(93,95)       |
| Yorkshire & Humber | -1<br>(-2,0)    | -1<br>(-2,0)    | 0<br>(-1,1)  | 7<br>(6,9)       | 8<br>(7,9)       | 17<br>(16,18)    | 19<br>(18,20)    | 15<br>(14,16)    | 6<br>(5,7)    | .<br>(..) | 70<br>(70,71)       |
| East Midlands      | -1<br>(-2,0)    | 0<br>(-1,1)     | 1<br>(0,1)   | 7<br>(6,8)       | 11<br>(9,12)     | 15<br>(13,16)    | 16<br>(16,17)    | 11<br>(10,12)    | 5<br>(3,6)    | .<br>(..) | 64<br>(63,64)       |
| West Midlands      | 0<br>(-1,1)     | 0<br>(-1,1)     | 0<br>(-1,1)  | 12<br>(11,13)    | 18<br>(16,19)    | 24<br>(22,25)    | 24<br>(22,25)    | 15<br>(14,16)    | 6<br>(5,6)    | .<br>(..) | 97<br>(96,98)       |
| East               | 0<br>(-1,1)     | -2<br>(-3,-1)   | 1<br>(0,2)   | 9<br>(8,10)      | 12<br>(11,14)    | 20<br>(19,22)    | 18<br>(17,19)    | 14<br>(13,14)    | 4<br>(3,5)    | .<br>(..) | 77<br>(76,77)       |
| London             | -1<br>(-1,0)    | 0<br>(0,1)      | 4<br>(3,5)   | 17<br>(17,18)    | 20<br>(20,21)    | 26<br>(25,27)    | 20<br>(20,21)    | 11<br>(11,12)    | 4<br>(3,4)    | .<br>(..) | 102<br>(102,103)    |
| South East         | 0<br>(-1,1)     | 0<br>(-1,0)     | 3<br>(2,4)   | 7<br>(7,8)       | 10<br>(9,11)     | 16<br>(14,17)    | 18<br>(17,19)    | 14<br>(13,15)    | 4<br>(2,5)    | .<br>(..) | 72<br>(71,73)       |
| South West         | -1<br>(-2,0)    | -1<br>(-1,0)    | 0<br>(-1,1)  | 7<br>(6,8)       | 7<br>(5,9)       | 13<br>(10,14)    | 14<br>(13,15)    | 7<br>(6,8)       | 3<br>(1,4)    | .<br>(..) | 49<br>(49,50)       |
| Wales              | -1<br>(-3,0)    | 1<br>(0,2)      | 2<br>(1,3)   | 7<br>(6,9)       | 7<br>(6,9)       | 16<br>(14,17)    | 14<br>(13,15)    | 8<br>(7,9)       | 2<br>(1,3)    | .<br>(..) | 55<br>(55,56)       |
| <i>Age groups†</i> |                 |                 |              |                  |                  |                  |                  |                  |               |           |                     |
| All <1             | 1<br>(1,2)      | 0<br>(-1,0)     | 1<br>(0,2)   | 1<br>(0,2)       | -1<br>(-2,0)     | 0<br>(0,1)       | 2<br>(1,2)       | 0<br>(0,1)       | -3<br>(-4,-2) | .<br>(..) | 1<br>(1,2)          |
| All 01-14          | 0<br>(0,0)      | 0<br>(0,0)      | 0<br>(0,0)   | 0<br>(0,0)       | 0<br>(0,0)       | 0<br>(0,0)       | 0<br>(0,0)       | 0<br>(0,0)       | 0<br>(0,0)    | .<br>(..) | 0<br>(0,0)          |
| All 15-44          | 0<br>(0,0)      | 0<br>(0,0)      | 0<br>(0,0)   | 0<br>(0,0)       | 0<br>(0,0)       | 0<br>(0,0)       | 1<br>(0,1)       | 0<br>(0,0)       | 0<br>(0,0)    | .<br>(..) | 1<br>(1,1)          |
| All 45-64          | 0<br>(0,1)      | 0<br>(0,0)      | 1<br>(1,1)   | 4<br>(4,5)       | 6<br>(5,6)       | 7<br>(6,8)       | 7<br>(7,7)       | 4<br>(4,5)       | 1<br>(1,2)    | .<br>(..) | 31<br>(31,32)       |
| All 65-74          | 0<br>(-1,1)     | 1<br>(0,2)      | 3<br>(2,4)   | 18<br>(16,19)    | 20<br>(18,21)    | 28<br>(26,30)    | 26<br>(25,27)    | 15<br>(14,17)    | 6<br>(4,7)    | .<br>(..) | 118<br>(117,119)    |
| All 75-84          | -4<br>(-7,0)    | -2<br>(-5,1)    | 8<br>(5,11)  | 53<br>(49,56)    | 67<br>(60,72)    | 96<br>(90,102)   | 93<br>(90,96)    | 57<br>(54,61)    | 20<br>(15,24) | .<br>(..) | 388<br>(385,391)    |
| All 85+            | -20<br>(-40,-1) | -20<br>(-37,-4) | 16<br>(4,27) | 135<br>(117,151) | 195<br>(168,220) | 345<br>(316,371) | 341<br>(325,356) | 245<br>(230,259) | .<br>95       | .<br>(..) | 1331<br>(1318,1344) |

|               | Week ending     |                 |               |                  |                  |                  |                  |                  |                 |      |                     |  |
|---------------|-----------------|-----------------|---------------|------------------|------------------|------------------|------------------|------------------|-----------------|------|---------------------|--|
|               | 13/3*           | 20/3            | 27/3          | 3/4              | 10/4             | 17/4             | 24/4             | 1/5              | 8/5             | 15/5 | Total               |  |
|               |                 |                 |               |                  |                  |                  |                  |                  | (81,109)        |      |                     |  |
|               |                 |                 |               |                  |                  |                  |                  |                  | )               |      |                     |  |
| Males <1      | -1<br>(-2,0)    | 0<br>(-2,1)     | 1<br>(0,2)    | 0<br>(-1,1)      | 1<br>(-1,2)      | -1<br>(-2,0)     | 2<br>(1,4)       | 1<br>(1,2)       | -3<br>(-4,-2)   | .    | 0<br>(-1,1)         |  |
| Males 01-14   | 0<br>(0,0)      | 0<br>(0,0)      | 0<br>(0,0)    | 0<br>(0,0)       | 0<br>(0,0)       | 0<br>(0,0)       | 0<br>(0,0)       | 0<br>(0,0)       | 0<br>(0,0)      | .    | 0<br>(0,0)          |  |
| Males 15-44   | 0<br>(0,0)      | 0<br>(0,0)      | 0<br>(0,0)    | 0<br>(0,0)       | 0<br>(0,0)       | 0<br>(0,0)       | 1<br>(0,1)       | 0<br>(0,0)       | 0<br>(0,0)      | .    | 1<br>(1,1)          |  |
| Males 45-64   | 1<br>(0,1)      | 0<br>(0,1)      | 1<br>(1,1)    | 6<br>(5,6)       | 8<br>(7,8)       | 9<br>(8,10)      | 9<br>(9,10)      | 6<br>(5,7)       | 2<br>(2,3)      | .    | 42<br>(41,42)       |  |
| Males 65-74   | 1<br>(0,2)      | 2<br>(0,3)      | 6<br>(5,7)    | 25<br>(23,27)    | 27<br>(25,29)    | 38<br>(36,40)    | 36<br>(34,37)    | 21<br>(19,22)    | 6<br>(4,8)      | .    | 162<br>(161,164)    |  |
| Males 75-84   | -3<br>(-7,1)    | -1<br>(-5,2)    | 13<br>(10,16) | 72<br>(67,77)    | 92<br>(85,99)    | 122<br>(115,128) | 117<br>(112,121) | 67<br>(63,71)    | 25<br>(20,30)   | .    | 503<br>(500,507)    |  |
| Males 85+     | -6<br>(-25,11)  | -8<br>(-23,7)   | 37<br>(24,49) | 195<br>(178,210) | 274<br>(245,301) | 398<br>(368,424) | 380<br>(367,393) | 250<br>(238,262) | 82<br>(65,98)   | .    | 1602<br>(1589,1615) |  |
| Females <1    | 4<br>(3,5)      | 0<br>(-1,0)     | 1<br>(0,2)    | 2<br>(1,3)       | -3<br>(-4,-2)    | 2<br>(1,3)       | 1<br>(0,1)       | -1<br>(-1,0)     | -2<br>(-4,-1)   | .    | 3<br>(2,3)          |  |
| Females 01-14 | 0<br>(0,0)      | 0<br>(0,0)      | 0<br>(0,0)    | 0<br>(0,0)       | 0<br>(0,0)       | 0<br>(0,0)       | 0<br>(0,0)       | 0<br>(0,0)       | 0<br>(0,0)      | .    | 0<br>(0,0)          |  |
| Females 15-44 | 0<br>(0,0)      | 0<br>(0,0)      | 0<br>(0,0)    | 0<br>(0,0)       | 0<br>(0,0)       | 0<br>(0,0)       | 0<br>(0,0)       | 0<br>(0,0)       | 0<br>(0,0)      | .    | 1<br>(1,1)          |  |
| Females 45-64 | 0<br>(0,0)      | 0<br>(0,0)      | 1<br>(1,1)    | 3<br>(2,3)       | 4<br>(4,4)       | 5<br>(5,6)       | 5<br>(4,5)       | 3<br>(3,3)       | 1<br>(0,1)      | .    | 21<br>(21,22)       |  |
| Females 65-74 | -1<br>(-2,0)    | 1<br>(0,2)      | 1<br>(0,2)    | 11<br>(9,12)     | 13<br>(12,14)    | 19<br>(17,21)    | 17<br>(16,17)    | 11<br>(9,12)     | 5<br>(3,6)      | .    | 76<br>(75,77)       |  |
| Females 75-84 | -4<br>(-8,-1)   | -3<br>(-6,0)    | 4<br>(1,6)    | 36<br>(33,39)    | 45<br>(40,50)    | 75<br>(68,80)    | 74<br>(71,76)    | 49<br>(46,52)    | 16<br>(12,20)   | .    | 291<br>(289,294)    |  |
| Females 85+   | -28<br>(-49,-8) | -26<br>(-45,-9) | 4<br>(-9,15)  | 99<br>(81,117)   | 148<br>(122,172) | 313<br>(285,339) | 318<br>(300,334) | 241<br>(225,257) | 104<br>(90,117) | .    | 1173<br>(1160,1186) |  |

\*week first COVID-19 related deaths were officially reported

† Sums across age groups and regions do not necessarily correspond to the England-Wales aggregate due to missing postcodes or ages for some deaths and different models used across population strata)

Table 3: Excess all-cause deaths, minus those with documented COVID-19 infection, from negative binomial regression model, 22/2/2020 to 8/5/2020

|                    | Week ending        |                     |                  |                     |                    |                     |                     |                     |                       |      | Total                |
|--------------------|--------------------|---------------------|------------------|---------------------|--------------------|---------------------|---------------------|---------------------|-----------------------|------|----------------------|
|                    | 13/3*              | 20/3                | 27/3             | 3/4                 | 10/4               | 17/4                | 24/4                | 1/5                 | 8/5                   | 15/5 |                      |
| England            | -310<br>(-787,147) | -377<br>(-793,23)   | 375<br>(32,706)  | 2286<br>(1751,2795) | 1327<br>(539,2063) | 2896<br>(2008,3716) | 3148<br>(2683,3594) | 1506<br>(1029,1962) | -1192<br>(-1754,-661) | .    | 9948<br>(9376,10520) |
| <i>Regions†</i>    |                    |                     |                  |                     |                    |                     |                     |                     |                       |      |                      |
| North East         | 15<br>(-7,35)      | -33<br>(-50,-14)    | -2<br>(-12,37)   | 85<br>(193,244)     | -2<br>(244,326)    | 129<br>(560,645)    | 123<br>(510,572)    | 49<br>(337,392)     | -34<br>(215,259)      | .    | 320<br>(290,351)     |
| North West         | -26<br>(-92,40)    | -14<br>(-53,46)     | 100<br>(115,203) | 291<br>(636,779)    | 201<br>(1011,1202) | 416<br>(1663,1862)  | 489<br>(1638,1752)  | 188<br>(1047,1147)  | -124<br>(403,538)     | .    | 1487<br>(1439,1535)  |
| Yorkshire & Humber | -58<br>(-94,-23)   | -76<br>(-116,-28)   | -18<br>(-47,34)  | 238<br>(345,475)    | 61<br>(360,506)    | 244<br>(860,1003)   | 298<br>(1011,1093)  | 180<br>(777,874)    | -82<br>(298,400)      | .    | 797<br>(760,834)     |
| East Midlands      | -65<br>(-109,-22)  | -4<br>(-49,45)      | 12<br>(6,66)     | 147<br>(296,366)    | 101<br>(459,586)   | 149<br>(622,785)    | 236<br>(768,827)    | 91<br>(477,577)     | -113<br>(162,276)     | .    | 568<br>(532,603)     |
| West Midlands      | 0<br>(-61,61)      | -11<br>(-60,62)     | -71<br>(-39,31)  | 305<br>(639,767)    | 238<br>(944,1138)  | 411<br>(1308,1504)  | 522<br>(1336,1464)  | 236<br>(826,945)    | -114<br>(272,384)     | .    | 1531<br>(1483,1579)  |
| East               | -17<br>(-66,31)    | -140<br>(-201,-77)  | 57<br>(24,113)   | 265<br>(492,602)    | 209<br>(680,860)   | 442<br>(1171,1373)  | 327<br>(1080,1200)  | 228<br>(809,907)    | -136<br>(165,305)     | .    | 1286<br>(1240,1332)  |
| London             | -74<br>(-109,-40)  | -29<br>(-31,59)     | 116<br>(297,406) | 357<br>(1474,1578)  | 326<br>(1767,1894) | 497<br>(2240,2386)  | 408<br>(1774,1853)  | 241<br>(980,1069)   | -119<br>(275,362)     | .    | 1814<br>(1780,1849)  |
| South East         | 15<br>(-66,97)     | -47<br>(-87,24)     | 188<br>(195,316) | 267<br>(595,758)    | 187<br>(788,1036)  | 342<br>(1298,1590)  | 464<br>(1601,1786)  | 292<br>(1164,1347)  | -208<br>(230,449)     | .    | 1570<br>(1502,1637)  |
| South West         | -62<br>(-140,10)   | -36<br>(-85,13)     | -31<br>(-49,25)  | 244<br>(318,474)    | 95<br>(292,486)    | 199<br>(584,806)    | 260<br>(732,848)    | 18<br>(363,477)     | -123<br>(78,224)      | .    | 609<br>(558,660)     |
| Wales              | -43<br>(-100,9)    | 20<br>(-12,55)      | 41<br>(32,90)    | 101<br>(196,272)    | -76<br>(179,274)   | 89<br>(447,545)     | 24<br>(408,465)     | -18<br>(234,290)    | -144<br>(32,100)      | .    | -18<br>(-45,9)       |
| <i>Age groups†</i> |                    |                     |                  |                     |                    |                     |                     |                     |                       |      |                      |
| All <1             | 6<br>(2,10)        | -5<br>(-9,-2)       | 3<br>(-4,8)      | 5<br>(1,8)          | -10<br>(-16,-5)    | 1<br>(-4,5)         | 8<br>(2,13)         | 2<br>(0,5)          | -17<br>(-24,-11)      | .    | 7<br>(4,10)          |
| All 01-14          | 3<br>(-1,6)        | -7<br>(-11,-4)      | -5<br>(-8,-3)    | 4<br>(2,5)          | -6<br>(-8,-4)      | -6<br>(-9,-5)       | -5<br>(-7,-3)       | -7<br>(-9,-5)       | 3<br>(1,4)            | .    | -27<br>(-28,-25)     |
| All 15-44          | 21<br>(7,35)       | -10<br>(-23,3)      | 14<br>(-2,29)    | -35<br>(-52,-19)    | -33<br>(-51,-17)   | -30<br>(-51,-12)    | 5<br>(-13,22)       | -5<br>(-27,15)      | -78<br>(-106,-54)     | .    | -138<br>(-151,-125)  |
| All 45-64          | 45<br>(19,71)      | 6<br>(-27,39)       | 63<br>(16,108)   | 210<br>(148,269)    | 70<br>(-3,139)     | 46<br>(-46,131)     | 182<br>(124,237)    | 130<br>(60,196)     | -97<br>(-180,-21)     | .    | 969<br>(926,1011)    |
| All 65-74          | -69<br>(-134,-6)   | -22<br>(-76,30)     | 10<br>(-51,69)   | 274<br>(168,373)    | -128<br>(-242,-20) | 84<br>(-55,212)     | 169<br>(102,234)    | 34<br>(-43,108)     | -156<br>(-252,-65)    | .    | 1249<br>(1191,1306)  |
| All 75-84          | -35<br>(-165,90)   | -13<br>(-132,101)   | 184<br>(84,280)  | 702<br>(561,836)    | 109<br>(-113,316)  | 581<br>(350,796)    | 685<br>(570,796)    | 84<br>(-43,206)     | -493<br>(-660,-336)   | .    | 2207<br>(2097,2317)  |
| All 85+            | -303<br>(-600,-23) | -346<br>(-596,-109) | 32<br>(-154,211) | 788<br>(523,1038)   | 636<br>(234,1005)  | 1471<br>(1036,1866) | 1323<br>(1082,1552) | 574<br>(349,787)    | -404<br>(-629,-192)   | .    | 5124<br>(4926,5321)  |



|               | Week ending |             |            |           |           |            |            |           |             |      |             |
|---------------|-------------|-------------|------------|-----------|-----------|------------|------------|-----------|-------------|------|-------------|
|               | 13/3*       | 20/3        | 27/3       | 3/4       | 10/4      | 17/4       | 24/4       | 1/5       | 8/5         | 15/5 | Total       |
|               | -4          | -3          | 1          | 0         | 1         | -5         | 7          | 4         | -10         | .    | -1          |
| Males <1      | (-7,-2)     | (-7,1)      | (-2,4)     | (-4,2)    | (-4,4)    | (-8,-1)    | (3,11)     | (2,6)     | (-14,-7)    | (..) | (-3,1)      |
|               | -1          | -2          | -5         | -3        | -4        | -4         | 0          | -6        | 5           | .    | -21         |
| Males 01-14   | (-3,1)      | (-5,0)      | (-7,-3)    | (-5,-1)   | (-6,-2)   | (-6,-3)    | (-2,1)     | (-7,-4)   | (3,6)       | (..) | (-22,-19)   |
|               | 13          | -3          | 12         | -16       | -32       | -24        | -5         | -17       | -46         | .    | -113        |
| Males 15-44   | (0,25)      | (-14,7)     | (-1,24)    | (-27,-5)  | (-46,-19) | (-40,-9)   | (-20,9)    | (-36,0)   | (-65,-29)   | (..) | (-123,-103) |
|               | 44          | 14          | 36         | 158       | 42        | -3         | 117        | 83        | -47         | .    | 614         |
| Males 45-64   | (21,66)     | (-8,35)     | (7,63)     | (123,191) | (-1,83)   | (-59,49)   | (78,154)   | (40,124)  | (-100,2)    | (..) | (587,640)   |
|               | -17         | -4          | 82         | 212       | -68       | 38         | 156        | 13        | -115        | .    | 863         |
| Males 65-74   | (-52,18)    | (-42,33)    | (55,107)   | (154,266) | (-138,-1) | (-40,111)  | (106,203)  | (-31,55)  | (-174,-59)  | (..) | (829,897)   |
|               | -4          | 11          | 186        | 421       | 69        | 267        | 364        | 38        | -285        | .    | 1214        |
| Males 75-84   | (-72,62)    | (-47,67)    | (131,239)  | (343,496) | (-56,186) | (153,373)  | (295,431)  | (-32,105) | (-371,-203) | (..) | (1155,1272) |
|               | -51         | -77         | 102        | 431       | 288       | 433        | 427        | 102       | -284        | .    | 1910        |
| Males 85+     | (-156,49)   | (-162,3)    | (24,177)   | (334,523) | (124,439) | (265,587)  | (350,501)  | (34,167)  | (-380,-193) | (..) | (1837,1983) |
|               | 10          | -3          | 1          | 5         | -11       | 5          | 1          | -2        | -7          | .    | 8           |
| Females <1    | (7,13)      | (-6,0)      | (-3,5)     | (2,8)     | (-14,-8)  | (3,7)      | (-1,3)     | (-5,0)    | (-11,-3)    | (..) | (6,10)      |
|               | 4           | -5          | 0          | 6         | -2        | -2         | -5         | -1        | -2          | .    | -6          |
| Females 01-14 | (1,6)       | (-7,-3)     | (-2,1)     | (5,8)     | (-3,-1)   | (-4,0)     | (-5,-4)    | (-3,0)    | (-4,-1)     | (..) | (-7,-5)     |
|               | 9           | -7          | 1          | -17       | -1        | -6         | 10         | 12        | -33         | .    | -24         |
| Females 15-44 | (4,13)      | (-13,-2)    | (-6,7)     | (-26,-9)  | (-8,6)    | (-14,2)    | (5,15)     | (5,20)    | (-45,-22)   | (..) | (-29,-19)   |
|               | 1           | -8          | 27         | 55        | 29        | 57         | 76         | 53        | -51         | .    | 352         |
| Females 45-64 | (-8,11)     | (-22,6)     | (1,52)     | (25,83)   | (-5,62)   | (20,92)    | (54,96)    | (23,80)   | (-82,-21)   | (..) | (334,370)   |
|               | -53         | -20         | -69        | 70        | -43       | 56         | 30         | 36        | -40         | .    | 387         |
| Females 65-74 | (-87,-20)   | (-39,-1)    | (-109,-32) | (21,116)  | (-89,0)   | (-8,115)   | (7,52)     | (1,70)    | (-80,-3)    | (..) | (361,413)   |
|               | -31         | -24         | -1         | 293       | 71        | 350        | 356        | 84        | -207        | .    | 1009        |
| Females 75-84 | (-95,31)    | (-90,39)    | (-51,47)   | (228,355) | (-29,164) | (231,459)  | (304,405)  | (20,145)  | (-290,-129) | (..) | (955,1063)  |
|               | -254        | -271        | -71        | 370       | 369       | 1077       | 957        | 541       | -119        | .    | 3250        |
| Females 85+   | (-452,-69)  | (-438,-113) | (-188,40)  | (197,531) | (128,590) | (810,1320) | (792,1112) | (384,688) | (-250,6)    | (..) | (3124,3377) |

\*week first COVID-19 related deaths were officially reported

† Sums across age groups and regions do not necessarily correspond to the England-Wales aggregate due to missing postcodes or ages for some deaths and different models used across population strata)

Table 4: Excess all-cause deaths, minus those with documented COVID-19 infection, per 100,000 population, from negative binomial regression model, 22/2/2020 to 8/5/2020

|                    | Week ending     |                 |              |               |               |                 |                 |               |                  |      |                  | Total |
|--------------------|-----------------|-----------------|--------------|---------------|---------------|-----------------|-----------------|---------------|------------------|------|------------------|-------|
|                    | 13/3*           | 20/3            | 27/3         | 3/4           | 10/4          | 17/4            | 24/4            | 1/5           | 8/5              | 15/5 |                  |       |
| England            | 0<br>(-1,0)     | -1<br>(-1,0)    | 1<br>(0,1)   | 4<br>(3,5)    | 2<br>(1,4)    | 5<br>(3,6)      | 5<br>(5,6)      | 3<br>(2,3)    | -2<br>(-3,-1)    | .    | 17<br>(16,18)    |       |
| <i>Regions†</i>    |                 |                 |              |               |               |                 |                 |               |                  |      |                  |       |
| North East         | 0<br>(0,1)      | -1<br>(-2,-1)   | 0<br>(-1,1)  | 3<br>(7,9)    | 0<br>(9,12)   | 5<br>(21,24)    | 5<br>(19,21)    | 2<br>(13,15)  | -1<br>(8,10)     | .    | 12<br>(11,13)    |       |
| North West         | 0<br>(-1,0)     | 0<br>(-1,1)     | 1<br>(1,3)   | 4<br>(9,10)   | 3<br>(14,16)  | 6<br>(22,25)    | 7<br>(22,24)    | 3<br>(14,16)  | -2<br>(5,7)      | .    | 20<br>(19,21)    |       |
| Yorkshire & Humber | -1<br>(-2,0)    | -1<br>(-2,0)    | 0<br>(-1,1)  | 4<br>(6,9)    | 1<br>(7,9)    | 4<br>(16,18)    | 5<br>(18,20)    | 3<br>(14,16)  | -1<br>(5,7)      | .    | 14<br>(14,15)    |       |
| East Midlands      | -1<br>(-2,0)    | 0<br>(-1,1)     | 0<br>(0,1)   | 3<br>(6,8)    | 2<br>(9,12)   | 3<br>(13,16)    | 5<br>(16,17)    | 2<br>(10,12)  | -2<br>(3,6)      | .    | 12<br>(11,12)    |       |
| West Midlands      | 0<br>(-1,1)     | 0<br>(-1,1)     | -1<br>(-1,1) | 5<br>(11,13)  | 4<br>(16,19)  | 7<br>(22,25)    | 9<br>(22,25)    | 4<br>(14,16)  | -2<br>(5,6)      | .    | 26<br>(25,26)    |       |
| East               | 0<br>(-1,1)     | -2<br>(-3,-1)   | 1<br>(0,2)   | 4<br>(8,10)   | 3<br>(11,14)  | 7<br>(19,22)    | 5<br>(17,19)    | 4<br>(13,14)  | -2<br>(3,5)      | .    | 21<br>(20,21)    |       |
| London             | -1<br>(-1,0)    | 0<br>(0,1)      | 1<br>(3,5)   | 4<br>(17,18)  | 4<br>(20,21)  | 6<br>(25,27)    | 5<br>(20,21)    | 3<br>(11,12)  | -1<br>(3,4)      | .    | 20<br>(20,21)    |       |
| South East         | 0<br>(-1,1)     | 0<br>(-1,0)     | 2<br>(2,4)   | 3<br>(7,8)    | 2<br>(9,11)   | 4<br>(14,17)    | 5<br>(17,19)    | 3<br>(13,15)  | -2<br>(2,5)      | .    | 17<br>(16,18)    |       |
| South West         | -1<br>(-2,0)    | -1<br>(-1,0)    | 0<br>(-1,1)  | 4<br>(6,8)    | 2<br>(5,9)    | 4<br>(10,14)    | 5<br>(13,15)    | 0<br>(6,8)    | -2<br>(1,4)      | .    | 11<br>(10,12)    |       |
| Wales              | -1<br>(-3,0)    | 1<br>(0,2)      | 1<br>(1,3)   | 3<br>(6,9)    | -2<br>(6,9)   | 3<br>(14,17)    | 1<br>(13,15)    | -1<br>(7,9)   | -5<br>(1,3)      | .    | -1<br>(-1,0)     |       |
| <i>Age groups†</i> |                 |                 |              |               |               |                 |                 |               |                  |      |                  |       |
| All <1             | 1<br>(1,2)      | 0<br>(-1,0)     | 1<br>(0,2)   | 1<br>(0,2)    | -1<br>(-2,0)  | 0<br>(0,1)      | 2<br>(1,2)      | 0<br>(0,1)    | -3<br>(-4,-2)    | .    | 1<br>(1,2)       |       |
| All 01-14          | 0<br>(0,0)      | 0<br>(0,0)      | 0<br>(0,0)   | 0<br>(0,0)    | 0<br>(0,0)    | 0<br>(0,0)      | 0<br>(0,0)      | 0<br>(0,0)    | 0<br>(0,0)       | .    | 0<br>(0,0)       |       |
| All 15-44          | 0<br>(0,0)      | 0<br>(0,0)      | 0<br>(0,0)   | 0<br>(0,0)    | 0<br>(0,0)    | 0<br>(0,0)      | 0<br>(0,0)      | 0<br>(0,0)    | 0<br>(0,0)       | .    | -1<br>(-1,-1)    |       |
| All 45-64          | 0<br>(0,1)      | 0<br>(0,0)      | 1<br>(0,1)   | 2<br>(1,2)    | 1<br>(0,1)    | 1<br>(0,1)      | 2<br>(1,2)      | 1<br>(1,2)    | -1<br>(-1,0)     | .    | 6<br>(6,7)       |       |
| All 65-74          | 0<br>(-1,1)     | 1<br>(0,2)      | 2<br>(1,3)   | 7<br>(6,9)    | 1<br>(-1,3)   | 4<br>(2,6)      | 6<br>(5,7)      | 2<br>(1,3)    | -3<br>(-4,-1)    | .    | 21<br>(20,22)    |       |
| All 75-84          | -4<br>(-8,0)    | -3<br>(-6,0)    | 3<br>(0,6)   | 19<br>(16,23) | 7<br>(1,13)   | 20<br>(13,26)   | 23<br>(19,26)   | 7<br>(4,10)   | -13<br>(-18,-9)  | .    | 59<br>(56,62)    |       |
| All 85+            | -20<br>(-40,-1) | -23<br>(-40,-7) | 3<br>(-9,15) | 58<br>(40,75) | 58<br>(31,82) | 119<br>(91,146) | 109<br>(93,124) | 60<br>(45,74) | -27<br>(-41,-13) | .    | 338<br>(325,351) |       |

|               | Week ending     |                  |               |                |               |                  |                  |               |                  |      | Total            |
|---------------|-----------------|------------------|---------------|----------------|---------------|------------------|------------------|---------------|------------------|------|------------------|
|               | 13/3*           | 20/3             | 27/3          | 3/4            | 10/4          | 17/4             | 24/4             | 1/5           | 8/5              | 15/5 |                  |
| Males <1      | -1<br>(-2,0)    | 0<br>(-2,1)      | 1<br>(0,2)    | 0<br>(-1,1)    | 1<br>(-1,2)   | -1<br>(-2,0)     | 2<br>(1,4)       | 1<br>(1,2)    | -3<br>(-4,-2)    | .    | 0<br>(-1,0)      |
| Males 01-14   | 0<br>(0,0)      | 0<br>(0,0)       | 0<br>(0,0)    | 0<br>(0,0)     | 0<br>(0,0)    | 0<br>(0,0)       | 0<br>(0,0)       | 0<br>(0,0)    | 0<br>(0,0)       | .    | 0<br>(0,0)       |
| Males 15-44   | 0<br>(0,0)      | 0<br>(0,0)       | 0<br>(0,0)    | 0<br>(0,0)     | 0<br>(0,0)    | 0<br>(0,0)       | 0<br>(0,0)       | 0<br>(0,0)    | 0<br>(-1,0)      | .    | -1<br>(-1,-1)    |
| Males 45-64   | 1<br>(0,1)      | 0<br>(0,1)       | 0<br>(0,1)    | 2<br>(2,3)     | 1<br>(1,2)    | 0<br>(0,1)       | 2<br>(2,3)       | 1<br>(1,2)    | -1<br>(-1,0)     | .    | 8<br>(8,8)       |
| Males 65-74   | 1<br>(0,2)      | 1<br>(0,3)       | 3<br>(3,4)    | 11<br>(9,13)   | 2<br>(-1,4)   | 5<br>(2,7)       | 9<br>(7,10)      | 2<br>(1,4)    | -4<br>(-6,-2)    | .    | 30<br>(29,31)    |
| Males 75-84   | -3<br>(-7,1)    | -2<br>(-6,1)     | 6<br>(3,9)    | 25<br>(21,30)  | 9<br>(1,16)   | 21<br>(14,27)    | 26<br>(22,30)    | 7<br>(3,11)   | -17<br>(-22,-12) | .    | 72<br>(68,75)    |
| Males 85+     | -6<br>(-25,11)  | -12<br>(-28,2)   | 19<br>(6,31)  | 84<br>(67,100) | 71<br>(42,98) | 102<br>(73,128)  | 95<br>(82,107)   | 35<br>(23,46) | -50<br>(-67,-34) | .    | 337<br>(324,350) |
| Females <1    | 4<br>(3,5)      | 0<br>(-1,0)      | 1<br>(0,2)    | 2<br>(1,3)     | -3<br>(-4,-2) | 2<br>(1,3)       | 1<br>(0,1)       | -1<br>(-1,0)  | -2<br>(-4,-1)    | .    | 3<br>(2,3)       |
| Females 01-14 | 0<br>(0,0)      | 0<br>(0,0)       | 0<br>(0,0)    | 0<br>(0,0)     | 0<br>(0,0)    | 0<br>(0,0)       | 0<br>(0,0)       | 0<br>(0,0)    | 0<br>(0,0)       | .    | 0<br>(0,0)       |
| Females 15-44 | 0<br>(0,0)      | 0<br>(0,0)       | 1<br>(0,0)    | 1<br>(0,0)     | 1<br>(0,0)    | 1<br>(0,0)       | 1<br>(0,0)       | 1<br>(0,0)    | -1<br>(0,0)      | .    | 5<br>(0,0)       |
| Females 45-64 | 0<br>(0,0)      | 0<br>(0,0)       | 1<br>(0,1)    | 1<br>(1,1)     | 1<br>(0,1)    | 1<br>(1,1)       | 1<br>(1,1)       | 1<br>(0,1)    | -1<br>(-1,0)     | .    | 5<br>(4,5)       |
| Females 65-74 | -1<br>(-2,0)    | 1<br>(0,1)       | 0<br>(-1,1)   | 4<br>(2,5)     | 1<br>(-1,2)   | 4<br>(2,5)       | 3<br>(3,4)       | 2<br>(1,3)    | -1<br>(-3,0)     | .    | 12<br>(12,13)    |
| Females 75-84 | -4<br>(-8,-1)   | -3<br>(-7,0)     | 1<br>(-2,3)   | 14<br>(11,18)  | 6<br>(1,10)   | 19<br>(13,25)    | 20<br>(17,23)    | 7<br>(4,10)   | -10<br>(-14,-6)  | .    | 50<br>(47,53)    |
| Females 85+   | -28<br>(-49,-8) | -28<br>(-47,-11) | -6<br>(-18,6) | 43<br>(24,60)  | 50<br>(24,74) | 131<br>(102,156) | 119<br>(101,135) | 75<br>(59,91) | -13<br>(-26,1)   | .    | 343<br>(329,356) |

\*week first COVID-19 related deaths were officially reported

† Sums across age groups and regions do not necessarily correspond to the England-Wales aggregate due to missing postcodes or ages for some deaths and different models used across population strata)

## Figures

Figure 1: All-cause excess mortality by region, ranked by highest to lowest total.

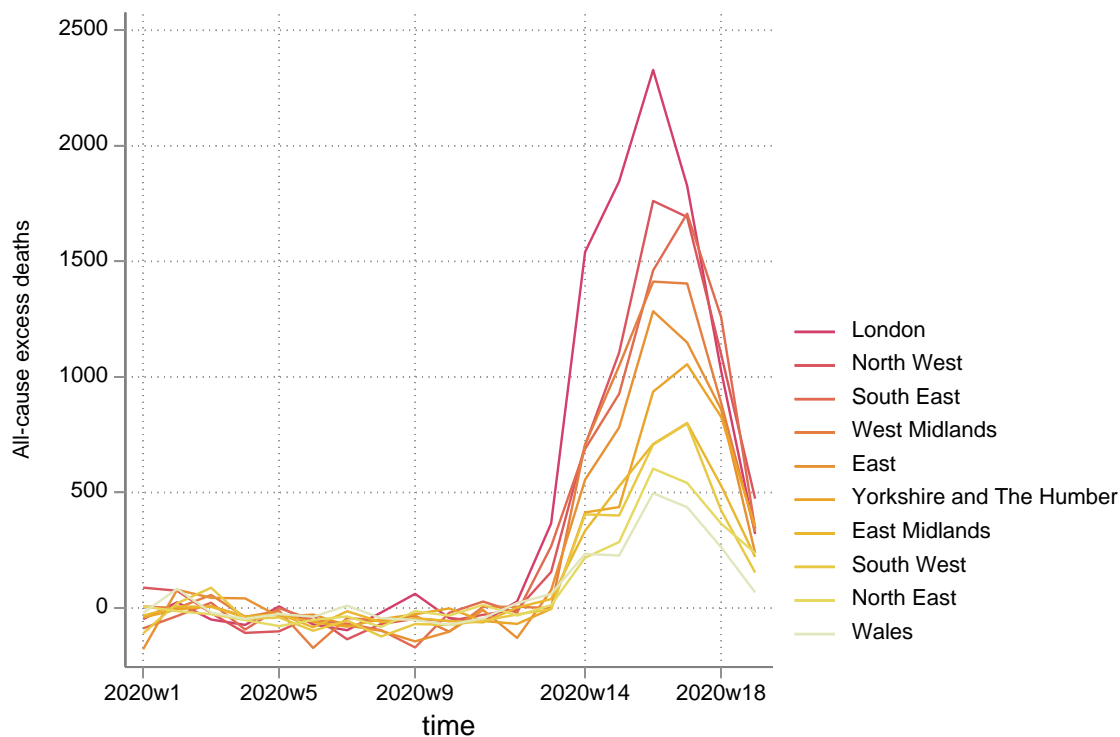

Figure 2: All-cause excess mortality per 100,000 population by region, ranked by highest to lowest total.

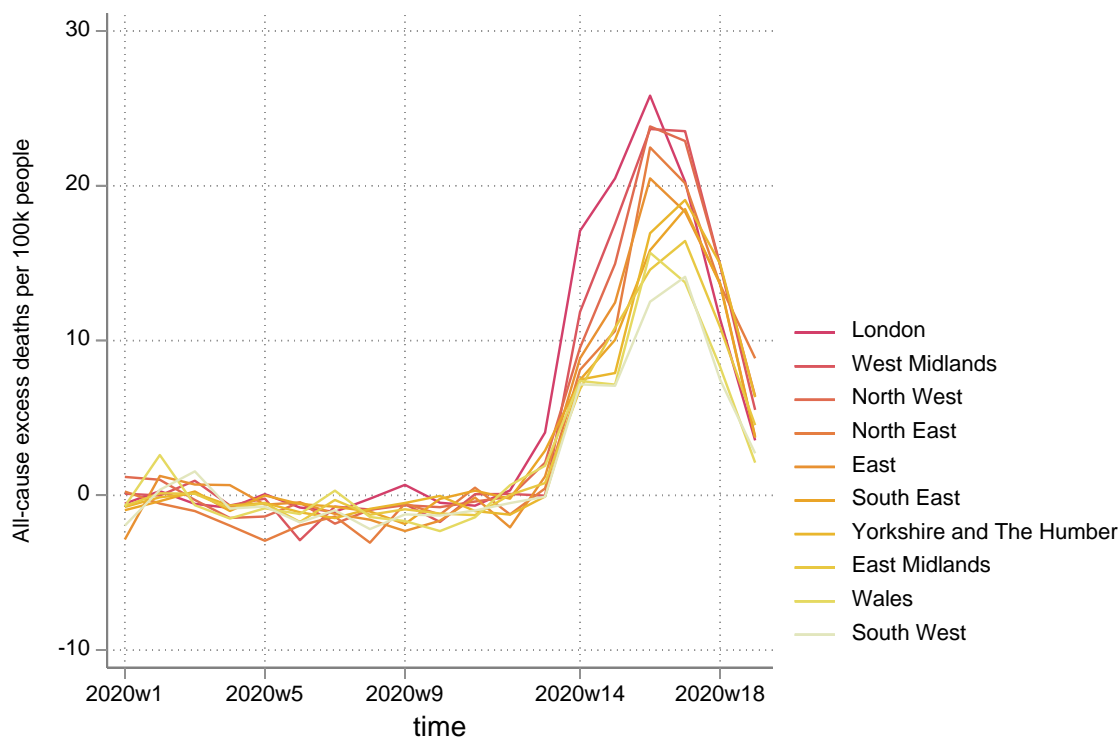

Figure 3: All-cause minus COVID-19 related excess mortality by region, ranked by highest to lowest total.

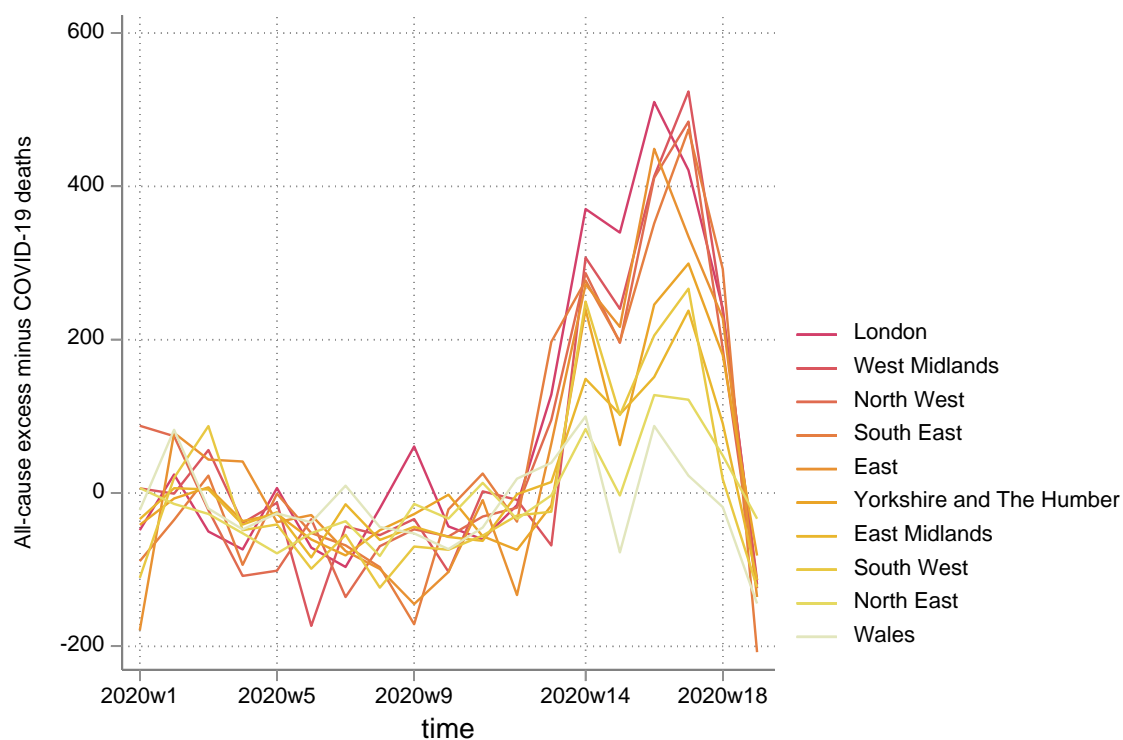

Figure 4: All-cause minus COVID-19 related excess mortality per 100,000 population by region, ranked by highest to lowest total.

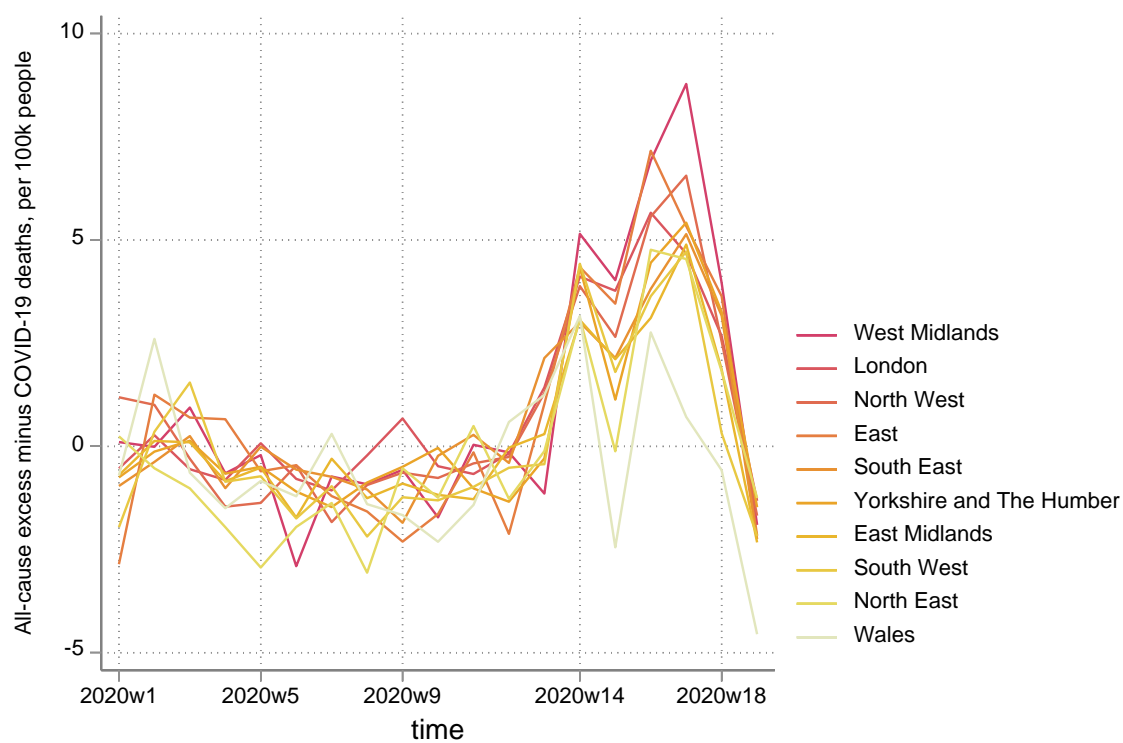

# Appendix 3 to excess mortality in England and Wales during the 2020 COVID19 pandemic

Evangelos Kontopantelis

Mamas A Mamas

John Deanfield

Miqdad Asaria

Tim Doran

May 27, 2020

## Contents

|          |                                                                                                 |          |
|----------|-------------------------------------------------------------------------------------------------|----------|
| <b>1</b> | <b>All-cause excess deaths, from 2020 week 1</b>                                                | <b>2</b> |
| <b>2</b> | <b>All-cause minus COVID-19 related excess deaths, from 2020 week 1</b>                         | <b>4</b> |
| <b>3</b> | <b>All-cause excess deaths, per 100,000 population, from 2020 week 1</b>                        | <b>6</b> |
| <b>4</b> | <b>All-cause excess deaths minus COVID-19 related, per 100,000 population, from 2020 week 1</b> | <b>8</b> |

# 1 All-cause excess deaths, from 2020 week 1

Figure 1: All-cause excess deaths, by region

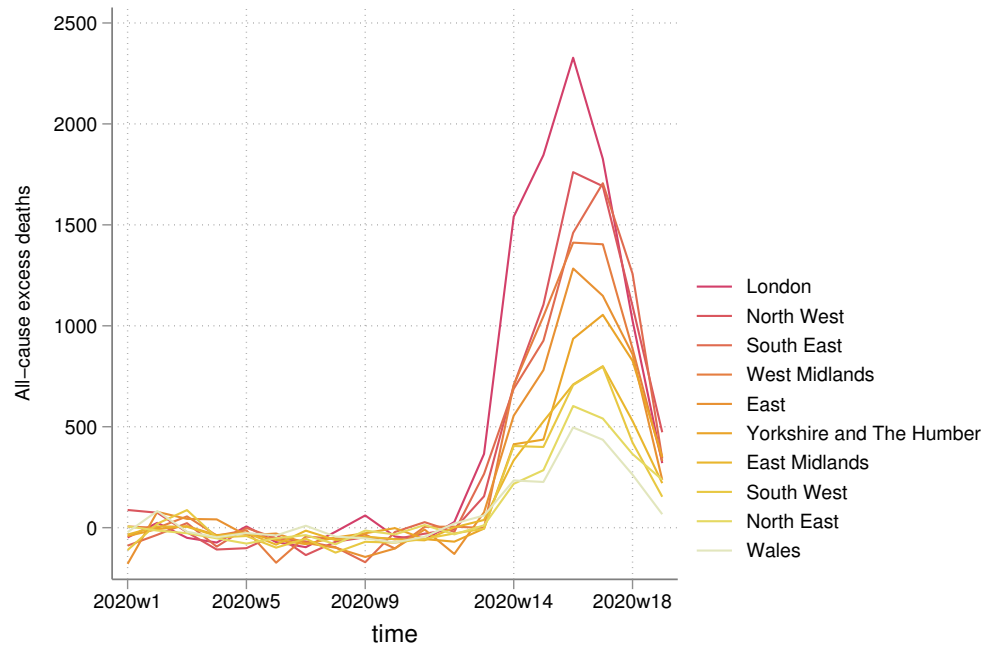

Figure 2: All-cause excess deaths, by age group

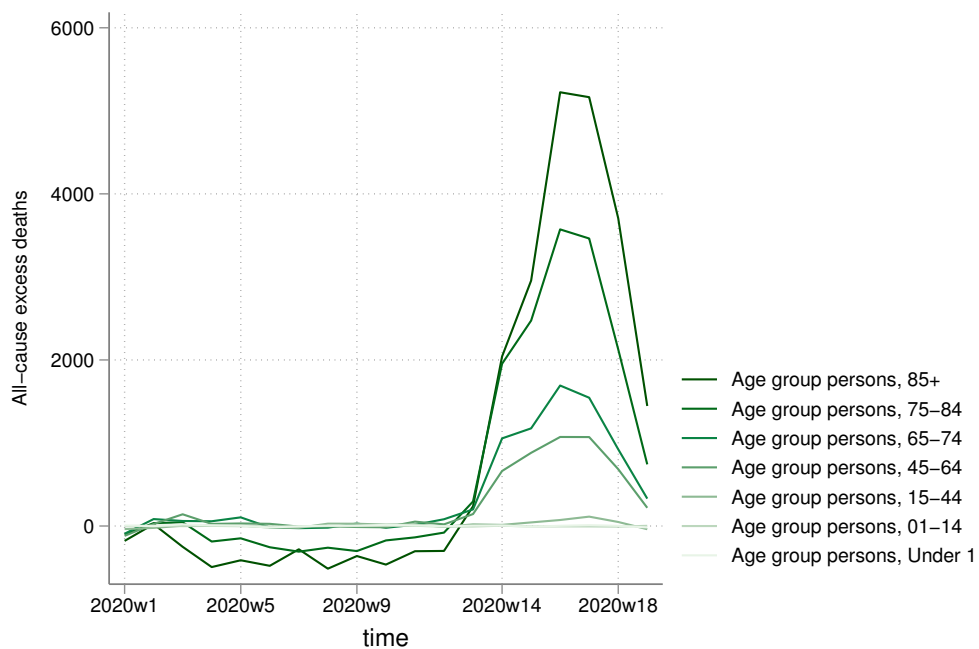

Figure 3: All-cause excess deaths, by age group and sex

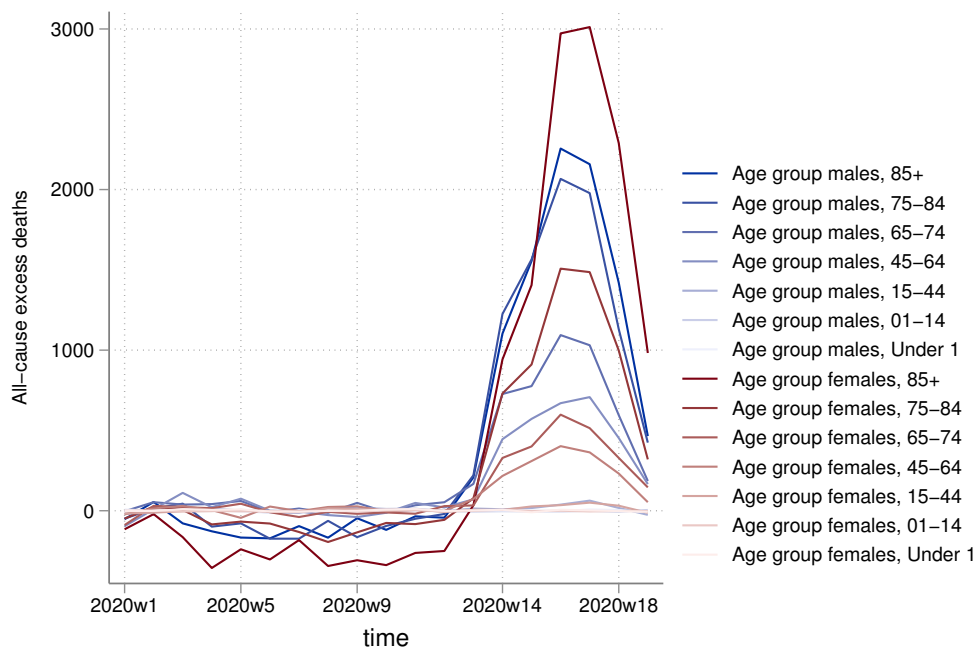



## 2 All-cause minus COVID-19 related excess deaths, from 2020 week 1

Figure 4: All-cause minus COVID-19 excess deaths, by region

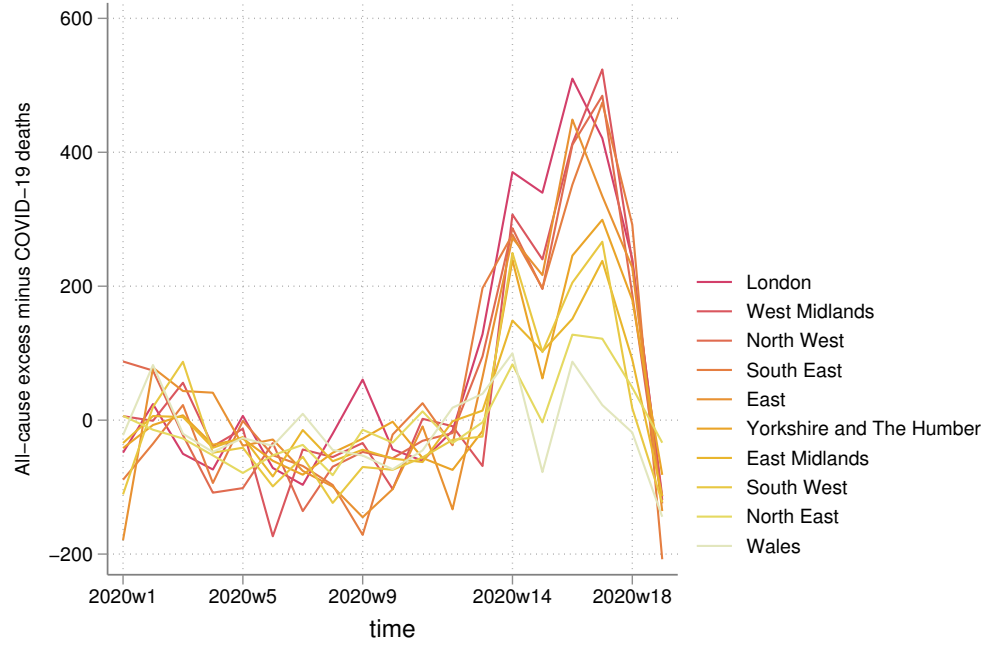

Figure 5: All-cause minus COVID-19 excess deaths, by age group

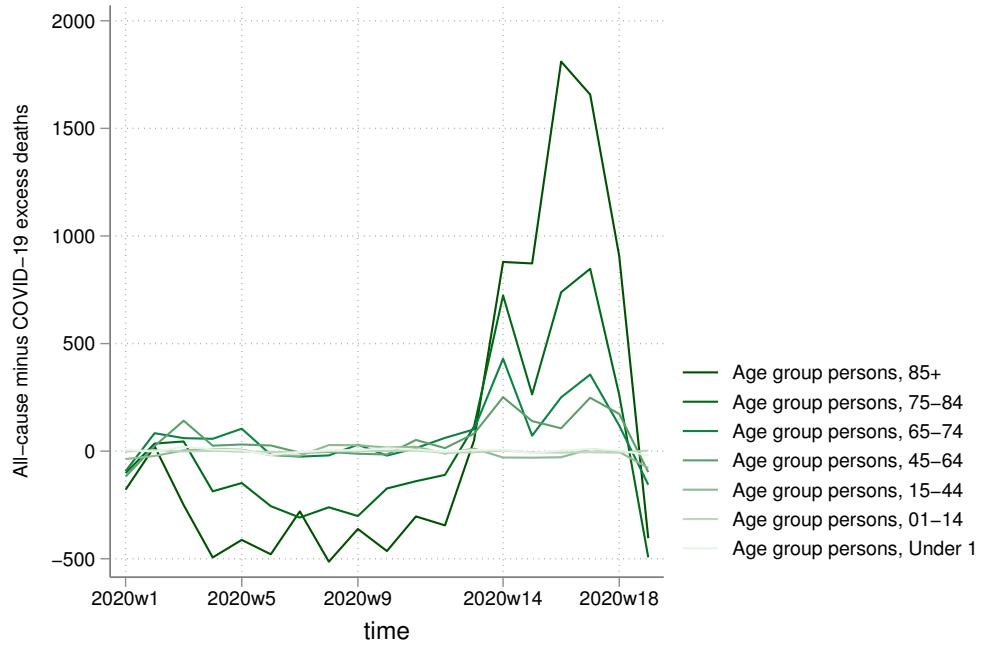

Figure 6: All-cause minus COVID-19 excess deaths, by age group and sex

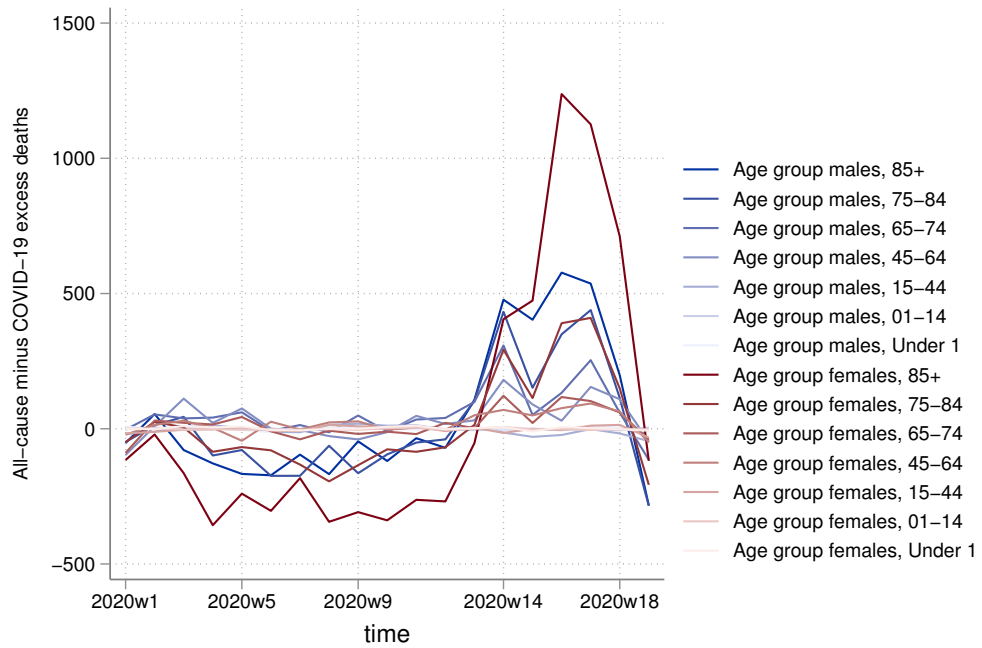

### 3 All-cause excess deaths, per 100,000 population, from 2020 week 1

Figure 7: All-cause excess deaths per 100k, by region

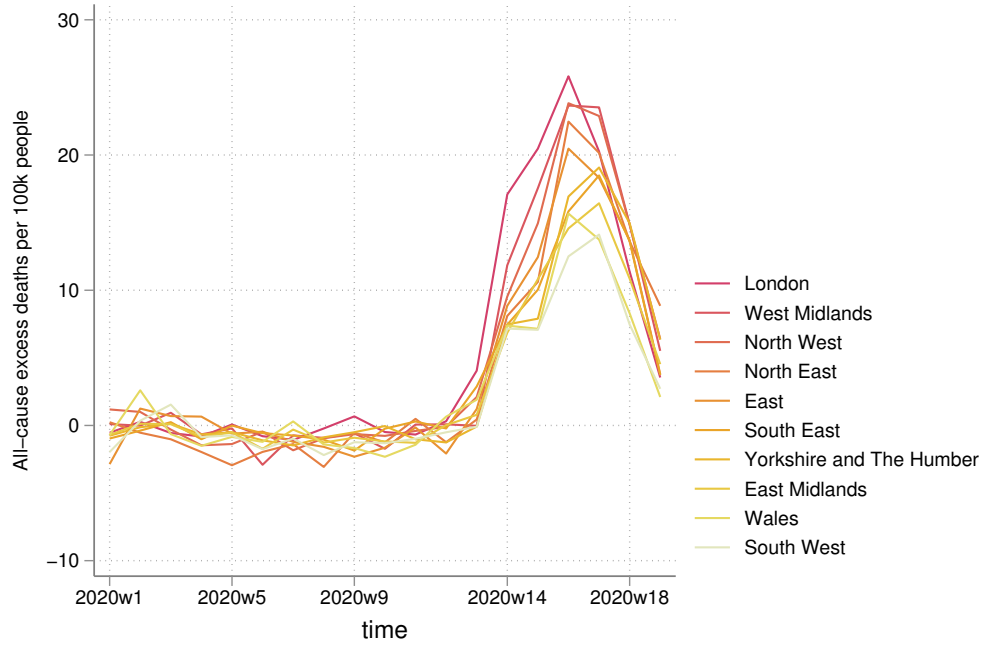

Figure 8: All-cause excess deaths per 100k, by age group

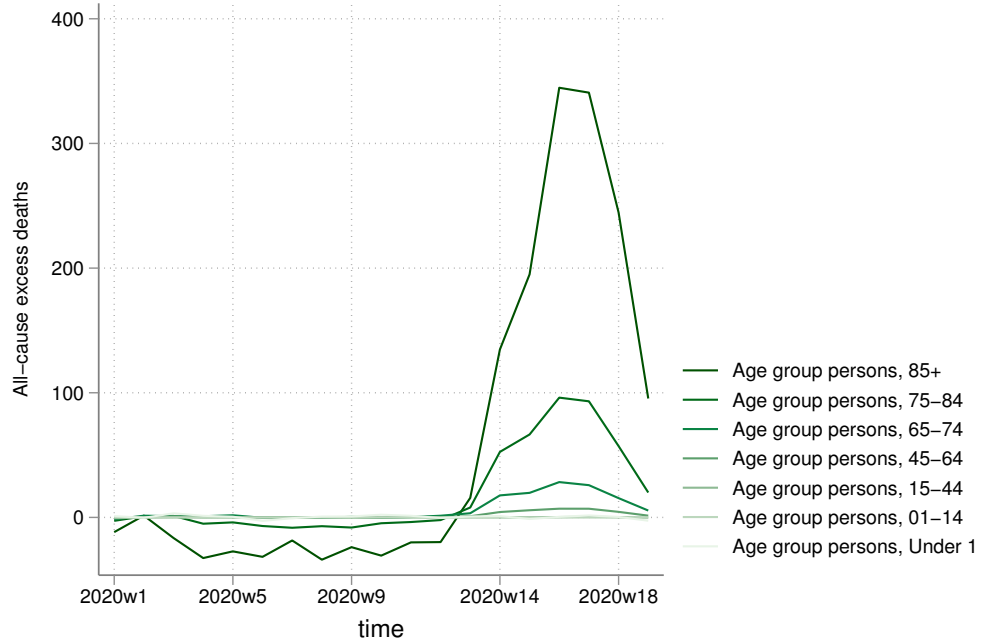

Figure 9: All-cause excess deaths per 100k, by age group and sex

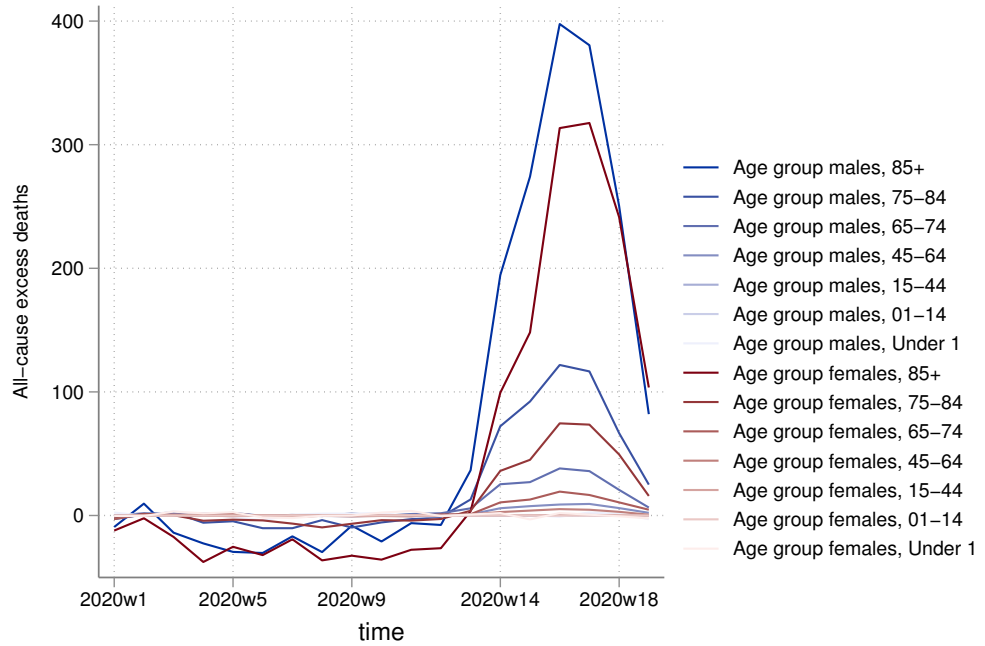

#### 4 All-cause excess deaths minus COVID-19 related, per 100,000 population, from 2020 week 1

Figure 10: All-cause minus COVID-19 excess deaths per 100k, by region

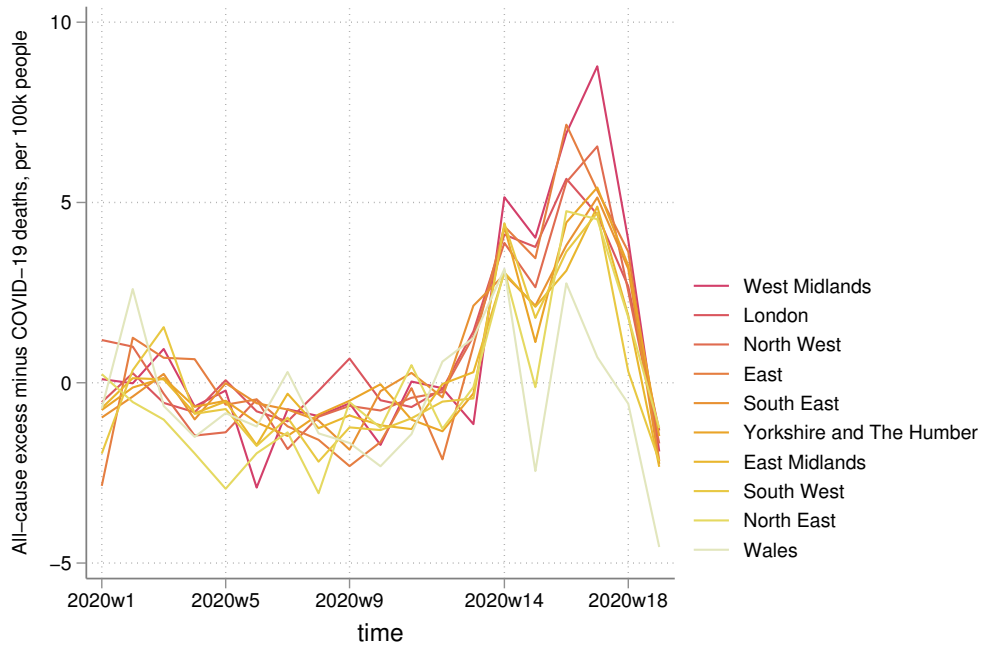

Figure 11: All-cause minus COVID-19 excess deaths per 100k, by age group

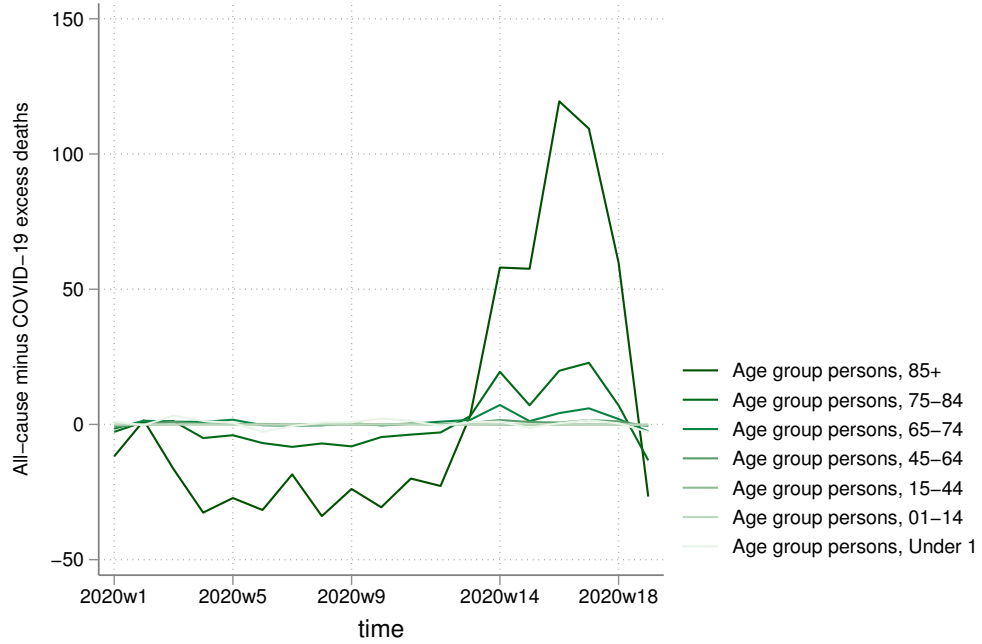

Figure 12: All-cause minus COVID-19 excess deaths per 100k, by age group and sex

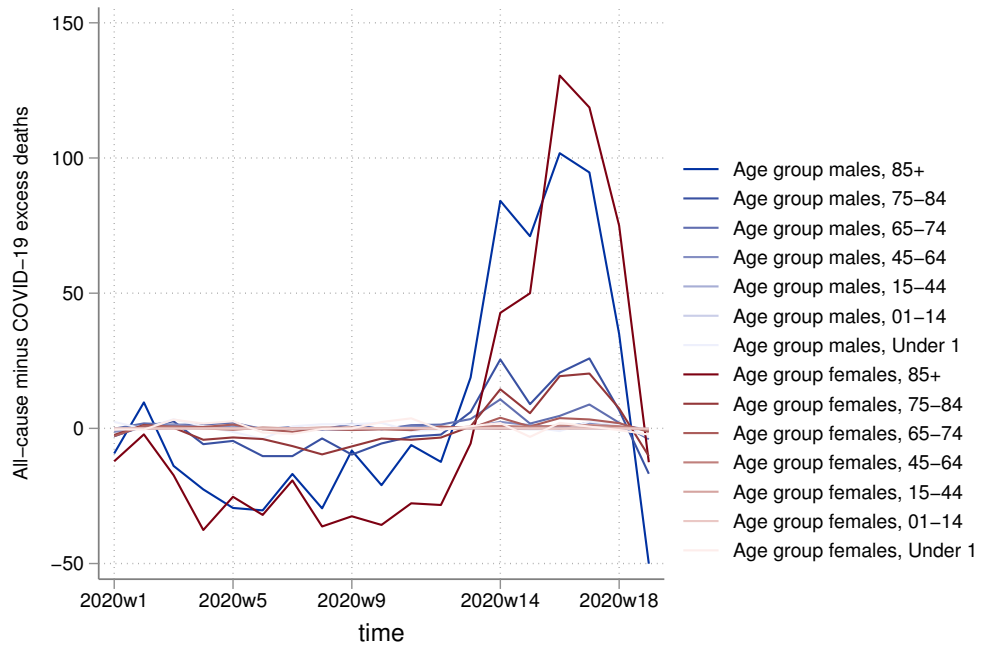

# Appendix 1 to excess mortality in England and Wales during the 2020 COVID19 pandemic

Evangelos Kontopantelis  
Mamas A Mamas  
John Deanfield  
Miqdad Asaria  
Tim Doran

May 27, 2020

## Contents

|          |                                                                        |           |
|----------|------------------------------------------------------------------------|-----------|
| <b>1</b> | <b>England-Wales aggregates</b>                                        | <b>10</b> |
| 1.1      | Time trend . . . . .                                                   | 10        |
| 1.2      | Time trend and Negative Binomial Regression model . . . . .            | 12        |
| 1.3      | Excess number of deaths: all causes . . . . .                          | 14        |
| 1.4      | Excess number of deaths: all causes minus COVID19 deaths . . . . .     | 16        |
| 1.5      | Excess number of deaths: all causes minus respiratory deaths . . . . . | 18        |
| <b>2</b> | <b>Regional</b>                                                        | <b>20</b> |
| 2.1      | Time trends . . . . .                                                  | 20        |
| 2.2      | North East . . . . .                                                   | 22        |
| 2.3      | North West . . . . .                                                   | 27        |
| 2.4      | Yorkshire and the Humber . . . . .                                     | 32        |
| 2.5      | East Midlands . . . . .                                                | 37        |
| 2.6      | West Midlands . . . . .                                                | 42        |
| 2.7      | East . . . . .                                                         | 47        |
| 2.8      | London . . . . .                                                       | 52        |
| 2.9      | South East . . . . .                                                   | 57        |
| 2.10     | South West . . . . .                                                   | 62        |
| 2.11     | Wales . . . . .                                                        | 67        |
| <b>3</b> | <b>Age groups, people</b>                                              | <b>72</b> |
| 3.1      | Time trends . . . . .                                                  | 72        |
| 3.2      | All aged under 1 . . . . .                                             | 74        |
| 3.3      | All aged 01-14 . . . . .                                               | 79        |
| 3.4      | All aged 15-44 . . . . .                                               | 84        |
| 3.5      | All aged 45-64 . . . . .                                               | 89        |

|          |                                |            |
|----------|--------------------------------|------------|
| 3.6      | All aged 65-74 . . . . .       | 94         |
| 3.7      | All aged 75-84 . . . . .       | 99         |
| 3.8      | All aged 85+ . . . . .         | 104        |
| <b>4</b> | <b>Age groups, males</b>       | <b>109</b> |
| 4.1      | Time trends . . . . .          | 109        |
| 4.2      | Males aged under 1 . . . . .   | 111        |
| 4.3      | Males aged 01-14 . . . . .     | 116        |
| 4.4      | Males aged 15-44 . . . . .     | 121        |
| 4.5      | Males aged 45-64 . . . . .     | 126        |
| 4.6      | Males aged 65-74 . . . . .     | 131        |
| 4.7      | Males aged 75-84 . . . . .     | 136        |
| 4.8      | Males aged 85+ . . . . .       | 141        |
| <b>5</b> | <b>Age groups, females</b>     | <b>146</b> |
| 5.1      | Time trends . . . . .          | 146        |
| 5.2      | Females aged under 1 . . . . . | 148        |
| 5.3      | Females aged 01-14 . . . . .   | 153        |
| 5.4      | Females aged 15-44 . . . . .   | 158        |
| 5.5      | Females aged 45-64 . . . . .   | 163        |
| 5.6      | Females aged 65-74 . . . . .   | 168        |
| 5.7      | Females aged 75-84 . . . . .   | 173        |
| 5.8      | Females aged 85+ . . . . .     | 178        |

## List of Figures

|    |                                                                   |    |
|----|-------------------------------------------------------------------|----|
| 1  | Mortality time trend, from 2010 week 1 . . . . .                  | 10 |
| 2  | Mortality time trend, from 2019 week 1 . . . . .                  | 11 |
| 3  | Mortality time trend, from 2020 week 1 . . . . .                  | 11 |
| 4  | Mortality time trend and model, from 2010 week 1 . . . . .        | 12 |
| 5  | Mortality time trend and model, from 2019 week 1 . . . . .        | 13 |
| 6  | Mortality time trend and model, from 2020 week 1 . . . . .        | 13 |
| 7  | All-cause excess deaths, from 2010 week 1 . . . . .               | 14 |
| 8  | All-cause excess deaths, from 2019 week 1 . . . . .               | 15 |
| 9  | All-cause excess deaths, from 2020 week 1 . . . . .               | 15 |
| 10 | All-cause excess deaths minus COVID19, from 2010 week 1 . . . . . | 16 |
| 11 | All-cause excess deaths minus COVID19, from 2019 week 1 . . . . . | 17 |
| 12 | All-cause excess deaths minus COVID19, from 2020 week 1 . . . . . | 17 |
| 13 | All-cause excess deaths minus COVID19, from 2010 week 1 . . . . . | 18 |
| 14 | All-cause excess deaths minus COVID19, from 2019 week 1 . . . . . | 19 |
| 15 | All-cause excess deaths minus COVID19, from 2020 week 1 . . . . . | 19 |
| 16 | Regional mortality time trends, from 2010 week 1 . . . . .        | 20 |
| 17 | Regional mortality time trends, from 2019 week 1 . . . . .        | 21 |
| 18 | Regional mortality time trends, from 2020 week 1 . . . . .        | 21 |
| 19 | NE Mortality time trend and model, from 2010 week 1 . . . . .     | 22 |



|    |                                                                        |    |
|----|------------------------------------------------------------------------|----|
| 20 | NE Mortality time trend and model, from 2019 week 1 . . . . .          | 23 |
| 21 | NE Mortality time trend and model, from 2020 week 1 . . . . .          | 23 |
| 22 | NE all-cause excess deaths, from 2010 week 1 . . . . .                 | 24 |
| 23 | NE all-cause excess deaths, from 2019 week 1 . . . . .                 | 24 |
| 24 | NE all-cause excess deaths, from 2020 week 1 . . . . .                 | 25 |
| 25 | NE all-cause excess deaths minus COVID19, from 2010 week 1 . . . . .   | 25 |
| 26 | NE all-cause excess deaths minus COVID19, from 2019 week 1 . . . . .   | 26 |
| 27 | NE all-cause excess deaths minus COVID19, from 2020 week 1 . . . . .   | 26 |
| 28 | NW Mortality time trend and model, from 2010 week 1 . . . . .          | 27 |
| 29 | NW Mortality time trend and model, from 2019 week 1 . . . . .          | 28 |
| 30 | NW Mortality time trend and model, from 2020 week 1 . . . . .          | 28 |
| 31 | NW all-cause excess deaths, from 2010 week 1 . . . . .                 | 29 |
| 32 | NW all-cause excess deaths, from 2019 week 1 . . . . .                 | 29 |
| 33 | NW all-cause excess deaths, from 2020 week 1 . . . . .                 | 30 |
| 34 | NW all-cause excess deaths minus COVID19, from 2010 week 1 . . . . .   | 30 |
| 35 | NW all-cause excess deaths minus COVID19, from 2019 week 1 . . . . .   | 31 |
| 36 | NW all-cause excess deaths minus COVID19, from 2020 week 1 . . . . .   | 31 |
| 37 | YatH Mortality time trend and model, from 2010 week 1 . . . . .        | 32 |
| 38 | YatH Mortality time trend and model, from 2019 week 1 . . . . .        | 33 |
| 39 | YatH Mortality time trend and model, from 2020 week 1 . . . . .        | 33 |
| 40 | YatH all-cause excess deaths, from 2010 week 1 . . . . .               | 34 |
| 41 | YatH all-cause excess deaths, from 2019 week 1 . . . . .               | 34 |
| 42 | YatH all-cause excess deaths, from 2020 week 1 . . . . .               | 35 |
| 43 | YatH all-cause excess deaths minus COVID19, from 2010 week 1 . . . . . | 35 |
| 44 | YatH all-cause excess deaths minus COVID19, from 2019 week 1 . . . . . | 36 |
| 45 | YatH all-cause excess deaths minus COVID19, from 2020 week 1 . . . . . | 36 |
| 46 | EMD Mortality time trend and model, from 2010 week 1 . . . . .         | 37 |
| 47 | EMD Mortality time trend and model, from 2019 week 1 . . . . .         | 38 |
| 48 | EMD Mortality time trend and model, from 2020 week 1 . . . . .         | 38 |
| 49 | EMD all-cause excess deaths, from 2010 week 1 . . . . .                | 39 |
| 50 | EMD all-cause excess deaths, from 2019 week 1 . . . . .                | 39 |
| 51 | EMD all-cause excess deaths, from 2020 week 1 . . . . .                | 40 |
| 52 | EMD all-cause excess deaths minus COVID19, from 2010 week 1 . . . . .  | 40 |
| 53 | EMD all-cause excess deaths minus COVID19, from 2019 week 1 . . . . .  | 41 |
| 54 | EMD all-cause excess deaths minus COVID19, from 2020 week 1 . . . . .  | 41 |
| 55 | WMD Mortality time trend and model, from 2010 week 1 . . . . .         | 42 |
| 56 | WMD Mortality time trend and model, from 2019 week 1 . . . . .         | 43 |
| 57 | WMD Mortality time trend and model, from 2020 week 1 . . . . .         | 43 |
| 58 | WMD all-cause excess deaths, from 2010 week 1 . . . . .                | 44 |
| 59 | WMD all-cause excess deaths, from 2019 week 1 . . . . .                | 44 |
| 60 | WMD all-cause excess deaths, from 2020 week 1 . . . . .                | 45 |
| 61 | WMD all-cause excess deaths minus COVID19, from 2010 week 1 . . . . .  | 45 |
| 62 | WMD all-cause excess deaths minus COVID19, from 2019 week 1 . . . . .  | 46 |
| 63 | WMD all-cause excess deaths minus COVID19, from 2020 week 1 . . . . .  | 46 |
| 64 | East Mortality time trend and model, from 2010 week 1 . . . . .        | 47 |
| 65 | East Mortality time trend and model, from 2019 week 1 . . . . .        | 48 |

|     |                                                                  |    |
|-----|------------------------------------------------------------------|----|
| 66  | East Mortality time trend and model, from 2020 week 1 . . . . .  | 48 |
| 67  | East all-cause excess deaths, from 2010 week 1 . . . . .         | 49 |
| 68  | East all-cause excess deaths, from 2019 week 1 . . . . .         | 49 |
| 69  | East all-cause excess deaths, from 2020 week 1 . . . . .         | 50 |
| 70  | East all-cause excess deaths minus COVID19, from 2010 week 1 .   | 50 |
| 71  | East all-cause excess deaths minus COVID19, from 2019 week 1 .   | 51 |
| 72  | East all-cause excess deaths minus COVID19, from 2020 week 1 .   | 51 |
| 73  | London Mortality time trend and model, from 2010 week 1 . . . .  | 52 |
| 74  | London Mortality time trend and model, from 2019 week 1 . . . .  | 53 |
| 75  | London Mortality time trend and model, from 2020 week 1 . . . .  | 53 |
| 76  | London all-cause excess deaths, from 2010 week 1 . . . . .       | 54 |
| 77  | London all-cause excess deaths, from 2019 week 1 . . . . .       | 54 |
| 78  | London all-cause excess deaths, from 2020 week 1 . . . . .       | 55 |
| 79  | London all-cause excess deaths minus COVID19, from 2010 week 1   | 55 |
| 80  | London all-cause excess deaths minus COVID19, from 2019 week 1   | 56 |
| 81  | London all-cause excess deaths minus COVID19, from 2020 week 1   | 56 |
| 82  | SE Mortality time trend and model, from 2010 week 1 . . . . .    | 57 |
| 83  | SE Mortality time trend and model, from 2019 week 1 . . . . .    | 58 |
| 84  | SE Mortality time trend and model, from 2020 week 1 . . . . .    | 58 |
| 85  | SE all-cause excess deaths, from 2010 week 1 . . . . .           | 59 |
| 86  | SE all-cause excess deaths, from 2019 week 1 . . . . .           | 59 |
| 87  | SE all-cause excess deaths, from 2020 week 1 . . . . .           | 60 |
| 88  | SE all-cause excess deaths minus COVID19, from 2010 week 1 . .   | 60 |
| 89  | SE all-cause excess deaths minus COVID19, from 2019 week 1 . .   | 61 |
| 90  | SE all-cause excess deaths minus COVID19, from 2020 week 1 . .   | 61 |
| 91  | SW Mortality time trend and model, from 2010 week 1 . . . . .    | 62 |
| 92  | SE Mortality time trend and model, from 2019 week 1 . . . . .    | 63 |
| 93  | SW Mortality time trend and model, from 2020 week 1 . . . . .    | 63 |
| 94  | SW all-cause excess deaths, from 2010 week 1 . . . . .           | 64 |
| 95  | SW all-cause excess deaths, from 2019 week 1 . . . . .           | 64 |
| 96  | SW all-cause excess deaths, from 2020 week 1 . . . . .           | 65 |
| 97  | SW all-cause excess deaths minus COVID19, from 2010 week 1 .     | 65 |
| 98  | SW all-cause excess deaths minus COVID19, from 2019 week 1 .     | 66 |
| 99  | SW all-cause excess deaths minus COVID19, from 2020 week 1 .     | 66 |
| 100 | Wales Mortality time trend and model, from 2010 week 1 . . . . . | 67 |
| 101 | SE Mortality time trend and model, from 2019 week 1 . . . . .    | 68 |
| 102 | Wales Mortality time trend and model, from 2020 week 1 . . . . . | 68 |
| 103 | Wales all-cause excess deaths, from 2010 week 1 . . . . .        | 69 |
| 104 | Wales all-cause excess deaths, from 2019 week 1 . . . . .        | 69 |
| 105 | Wales all-cause excess deaths, from 2020 week 1 . . . . .        | 70 |
| 106 | Wales all-cause excess deaths minus COVID19, from 2010 week 1    | 70 |
| 107 | Wales all-cause excess deaths minus COVID19, from 2019 week 1    | 71 |
| 108 | Wales all-cause excess deaths minus COVID19, from 2020 week 1    | 71 |
| 109 | All age group mortality time trends, from 2010 week 1 . . . . .  | 72 |
| 110 | All age group mortality time trends, from 2019 week 1 . . . . .  | 73 |
| 111 | All age group mortality time trends, from 2020 week 1 . . . . .  | 73 |

|     |                                                                  |    |
|-----|------------------------------------------------------------------|----|
| 112 | All < 1 mortality time trend and model, from 2010 week 1 . . . . | 74 |
| 113 | All < 1 mortality time trend and model, from 2019 week 1 . . . . | 75 |
| 114 | All < 1 mortality time trend and model, from 2020 week 1 . . . . | 75 |
| 115 | All < 1 all-cause excess deaths, from 2010 week 1 . . . . .      | 76 |
| 116 | All < 1 all-cause excess deaths, from 2019 week 1 . . . . .      | 76 |
| 117 | All < 1 all-cause excess deaths, from 2020 week 1 . . . . .      | 77 |
| 118 | All < 1 all-cause excess deaths minus COVID19, from 2010 week 1  | 77 |
| 119 | All < 1 all-cause excess deaths minus COVID19, from 2019 week 1  | 78 |
| 120 | All < 1 all-cause excess deaths minus COVID19, from 2020 week 1  | 78 |
| 121 | All 01-14 mortality time trend and model, from 2010 week 1 . . . | 79 |
| 122 | All 01-14 mortality time trend and model, from 2019 week 1 . . . | 80 |
| 123 | All 01-14 mortality time trend and model, from 2020 week 1 . . . | 80 |
| 124 | All 01-14 all-cause excess deaths, from 2010 week 1 . . . . .    | 81 |
| 125 | All 01-14 all-cause excess deaths, from 2019 week 1 . . . . .    | 81 |
| 126 | All 01-14 all-cause excess deaths, from 2020 week 1 . . . . .    | 82 |
| 127 | All 01-14 all-cause excess deaths (–COVID19), from 2010 week 1   | 82 |
| 128 | All 01-14 all-cause excess deaths (–COVID19), from 2019 week 1   | 83 |
| 129 | All 01-14 all-cause excess deaths (–COVID19), from 2020 week 1   | 83 |
| 130 | All 15-44 mortality time trend and model, from 2010 week 1 . . . | 84 |
| 131 | All 15-44 mortality time trend and model, from 2019 week 1 . . . | 85 |
| 132 | All 15-44 mortality time trend and model, from 2020 week 1 . . . | 85 |
| 133 | All 15-44 all-cause excess deaths, from 2010 week 1 . . . . .    | 86 |
| 134 | All 15-44 all-cause excess deaths, from 2019 week 1 . . . . .    | 86 |
| 135 | All 15-44 all-cause excess deaths, from 2020 week 1 . . . . .    | 87 |
| 136 | All 15-44 all-cause excess deaths (–COVID19), from 2010 week 1   | 87 |
| 137 | All 15-44 all-cause excess deaths (–COVID19), from 2019 week 1   | 88 |
| 138 | All 15-44 all-cause excess deaths (–COVID19), from 2020 week 1   | 88 |
| 139 | All 45-64 mortality time trend and model, from 2010 week 1 . . . | 89 |
| 140 | All 45-64 mortality time trend and model, from 2019 week 1 . . . | 90 |
| 141 | All 45-64 mortality time trend and model, from 2020 week 1 . . . | 90 |
| 142 | All 45-64 all-cause excess deaths, from 2010 week 1 . . . . .    | 91 |
| 143 | All 45-64 all-cause excess deaths, from 2019 week 1 . . . . .    | 91 |
| 144 | All 45-64 all-cause excess deaths, from 2020 week 1 . . . . .    | 92 |
| 145 | All 45-64 all-cause excess deaths (–COVID19), from 2010 week 1   | 92 |
| 146 | All 45-64 all-cause excess deaths (–COVID19), from 2019 week 1   | 93 |
| 147 | All 45-64 all-cause excess deaths (–COVID19), from 2020 week 1   | 93 |
| 148 | All 65-74 mortality time trend and model, from 2010 week 1 . . . | 94 |
| 149 | All 65-74 mortality time trend and model, from 2019 week 1 . . . | 95 |
| 150 | All 65-74 mortality time trend and model, from 2020 week 1 . . . | 95 |
| 151 | All 65-74 all-cause excess deaths, from 2010 week 1 . . . . .    | 96 |
| 152 | All 65-74 all-cause excess deaths, from 2019 week 1 . . . . .    | 96 |
| 153 | All 65-74 all-cause excess deaths, from 2020 week 1 . . . . .    | 97 |
| 154 | All 65-74 all-cause excess deaths (–COVID19), from 2010 week 1   | 97 |
| 155 | All 65-74 all-cause excess deaths (–COVID19), from 2019 week 1   | 98 |
| 156 | All 65-74 all-cause excess deaths (–COVID19), from 2020 week 1   | 98 |
| 157 | All 75-84 mortality time trend and model, from 2010 week 1 . . . | 99 |

|     |                                                                   |     |
|-----|-------------------------------------------------------------------|-----|
| 158 | All 75-84 mortality time trend and model, from 2019 week 1 . . .  | 100 |
| 159 | All 75-84 mortality time trend and model, from 2020 week 1 . . .  | 100 |
| 160 | All 75-84 all-cause excess deaths, from 2010 week 1 . . . . .     | 101 |
| 161 | All 75-84 all-cause excess deaths, from 2019 week 1 . . . . .     | 101 |
| 162 | All 75-84 all-cause excess deaths, from 2020 week 1 . . . . .     | 102 |
| 163 | All 75-84 all-cause excess deaths (–COVID19), from 2010 week 1    | 102 |
| 164 | All 75-84 all-cause excess deaths (–COVID19), from 2019 week 1    | 103 |
| 165 | All 75-84 all-cause excess deaths (–COVID19), from 2020 week 1    | 103 |
| 166 | All 85+ mortality time trend and model, from 2010 week 1 . . .    | 104 |
| 167 | All 85+ mortality time trend and model, from 2019 week 1 . . .    | 105 |
| 168 | All 85+ mortality time trend and model, from 2020 week 1 . . .    | 105 |
| 169 | All 85+ all-cause excess deaths, from 2010 week 1 . . . . .       | 106 |
| 170 | All 85+ all-cause excess deaths, from 2019 week 1 . . . . .       | 106 |
| 171 | All 85+ all-cause excess deaths, from 2020 week 1 . . . . .       | 107 |
| 172 | All 85+ all-cause excess deaths (–COVID19), from 2010 week 1      | 107 |
| 173 | All 85+ all-cause excess deaths (–COVID19), from 2019 week 1      | 108 |
| 174 | All 85+ all-cause excess deaths (–COVID19), from 2020 week 1      | 108 |
| 175 | Male age group mortality time trends, from 2010 wk1 . . . . .     | 109 |
| 176 | Male age group mortality time trends, from 2019 wk1 . . . . .     | 110 |
| 177 | Male age group mortality time trends, from 2020 wk1 . . . . .     | 110 |
| 178 | Males < 1 mortality time trend and model, from 2010 wk1 . . . .   | 111 |
| 179 | Males < 1 mortality time trend and model, from 2019 wk1 . . . .   | 112 |
| 180 | Males < 1 mortality time trend and model, from 2020 wk1 . . . .   | 112 |
| 181 | Males < 1 all-cause excess deaths, from 2010 wk1 . . . . .        | 113 |
| 182 | Males < 1 all-cause excess deaths, from 2019 wk1 . . . . .        | 113 |
| 183 | Males < 1 all-cause excess deaths, from 2020 wk1 . . . . .        | 114 |
| 184 | Males < 1 all-cause excess deaths minus COVID19, from 2010 wk1114 |     |
| 185 | Males < 1 all-cause excess deaths minus COVID19, from 2019 wk1115 |     |
| 186 | Males < 1 all-cause excess deaths minus COVID19, from 2020 wk1115 |     |
| 187 | Males 01-14 mortality time trend and model, from 2010 wk1 . . .   | 116 |
| 188 | Males 01-14 mortality time trend and model, from 2019 wk1 . . .   | 117 |
| 189 | Males 01-14 mortality time trend and model, from 2020 wk1 . . .   | 117 |
| 190 | Males 01-14 all-cause excess deaths, from 2010 wk1 . . . . .      | 118 |
| 191 | Males 01-14 all-cause excess deaths, from 2019 wk1 . . . . .      | 118 |
| 192 | Males 01-14 all-cause excess deaths, from 2020 wk1 . . . . .      | 119 |
| 193 | Males 01-14 all-cause excess deaths (–COVID19), from 2010 wk1     | 119 |
| 194 | Males 01-14 all-cause excess deaths (–COVID19), from 2019 wk1     | 120 |
| 195 | Males 01-14 all-cause excess deaths (–COVID19), from 2020 wk1     | 120 |
| 196 | Males 15-44 mortality time trend and model, from 2010 wk1 . . .   | 121 |
| 197 | Males 15-44 mortality time trend and model, from 2019 wk1 . . .   | 122 |
| 198 | Males 15-44 mortality time trend and model, from 2020 wk1 . . .   | 122 |
| 199 | Males 15-44 all-cause excess deaths, from 2010 wk1 . . . . .      | 123 |
| 200 | Males 15-44 all-cause excess deaths, from 2019 wk1 . . . . .      | 123 |
| 201 | Males 15-44 all-cause excess deaths, from 2020 wk1 . . . . .      | 124 |
| 202 | Males 15-44 all-cause excess deaths (–COVID19), from 2010 wk1     | 124 |
| 203 | Males 15-44 all-cause excess deaths (–COVID19), from 2019 wk1     | 125 |

|     |                                                                 |     |
|-----|-----------------------------------------------------------------|-----|
| 204 | Males 15-44 all-cause excess deaths (–COVID19), from 2020 wk1   | 125 |
| 205 | Males 45-64 mortality time trend and model, from 2010 wk1 . . . | 126 |
| 206 | Males 45-64 mortality time trend and model, from 2019 wk1 . . . | 127 |
| 207 | Males 45-64 mortality time trend and model, from 2020 wk1 . . . | 127 |
| 208 | Males 45-64 all-cause excess deaths, from 2010 wk1 . . . . .    | 128 |
| 209 | Males 45-64 all-cause excess deaths, from 2019 wk1 . . . . .    | 128 |
| 210 | Males 45-64 all-cause excess deaths, from 2020 wk1 . . . . .    | 129 |
| 211 | Males 45-64 all-cause excess deaths (–COVID19), from 2010 wk1   | 129 |
| 212 | Males 45-64 all-cause excess deaths (–COVID19), from 2019 wk1   | 130 |
| 213 | Males 45-64 all-cause excess deaths (–COVID19), from 2020 wk1   | 130 |
| 214 | Males 65-74 mortality time trend and model, from 2010 wk1 . . . | 131 |
| 215 | Males 65-74 mortality time trend and model, from 2019 wk1 . . . | 132 |
| 216 | Males 65-74 mortality time trend and model, from 2020 wk1 . . . | 132 |
| 217 | Males 65-74 all-cause excess deaths, from 2010 wk1 . . . . .    | 133 |
| 218 | Males 65-74 all-cause excess deaths, from 2019 wk1 . . . . .    | 133 |
| 219 | Males 65-74 all-cause excess deaths, from 2020 wk1 . . . . .    | 134 |
| 220 | Males 65-74 all-cause excess deaths (–COVID19), from 2010 wk1   | 134 |
| 221 | Males 65-74 all-cause excess deaths (–COVID19), from 2019 wk1   | 135 |
| 222 | Males 65-74 all-cause excess deaths (–COVID19), from 2020 wk1   | 135 |
| 223 | Males 75-84 mortality time trend and model, from 2010 wk1 . . . | 136 |
| 224 | Males 75-84 mortality time trend and model, from 2019 wk1 . . . | 137 |
| 225 | Males 75-84 mortality time trend and model, from 2020 wk1 . . . | 137 |
| 226 | Males 75-84 all-cause excess deaths, from 2010 wk1 . . . . .    | 138 |
| 227 | Males 75-84 all-cause excess deaths, from 2019 wk1 . . . . .    | 138 |
| 228 | Males 75-84 all-cause excess deaths, from 2020 wk1 . . . . .    | 139 |
| 229 | Males 75-84 all-cause excess deaths (–COVID19), from 2010 wk1   | 139 |
| 230 | Males 75-84 all-cause excess deaths (–COVID19), from 2019 wk1   | 140 |
| 231 | Males 75-84 all-cause excess deaths (–COVID19), from 2020 wk1   | 140 |
| 232 | Males 85+ mortality time trend and model, from 2010 wk1 . . .   | 141 |
| 233 | Males 85+ mortality time trend and model, from 2019 wk1 . . .   | 142 |
| 234 | Males 85+ mortality time trend and model, from 2020 wk1 . . .   | 142 |
| 235 | Males 85+ all-cause excess deaths, from 2010 wk1 . . . . .      | 143 |
| 236 | Males 85+ all-cause excess deaths, from 2019 wk1 . . . . .      | 143 |
| 237 | Males 85+ all-cause excess deaths, from 2020 wk1 . . . . .      | 144 |
| 238 | Males 85+ all-cause excess deaths (–COVID19), from 2010 wk1     | 144 |
| 239 | Males 85+ all-cause excess deaths (–COVID19), from 2019 wk1     | 145 |
| 240 | Males 85+ all-cause excess deaths (–COVID19), from 2020 wk1     | 145 |
| 241 | Female age group mortality time trends, fm 2010 wk1 . . . . .   | 146 |
| 242 | Female age group mortality time trends, fm 2019 wk1 . . . . .   | 147 |
| 243 | Female age group mortality time trends, fm 2020 wk1 . . . . .   | 147 |
| 244 | Females < 1 mortality time trend and model, fm 2010 wk1 . . .   | 148 |
| 245 | Females < 1 mortality time trend and model, fm 2019 wk1 . . .   | 149 |
| 246 | Females < 1 mortality time trend and model, fm 2020 wk1 . . .   | 149 |
| 247 | Females < 1 all-cause excess deaths, fm 2010 wk1 . . . . .      | 150 |
| 248 | Females < 1 all-cause excess deaths, fm 2019 wk1 . . . . .      | 150 |
| 249 | Females < 1 all-cause excess deaths, fm 2020 wk1 . . . . .      | 151 |

|     |                                                                |     |
|-----|----------------------------------------------------------------|-----|
| 250 | Females < 1 all-cause excess deaths minus COVID19, fm 2010 wk1 | 151 |
| 251 | Females < 1 all-cause excess deaths minus COVID19, fm 2019 wk1 | 152 |
| 252 | Females < 1 all-cause excess deaths minus COVID19, fm 2020 wk1 | 152 |
| 253 | Females 01-14 mortality time trend and model, fm 2010 wk1      | 153 |
| 254 | Females 01-14 mortality time trend and model, fm 2019 wk1      | 154 |
| 255 | Females 01-14 mortality time trend and model, fm 2020 wk1      | 154 |
| 256 | Females 01-14 all-cause excess deaths, fm 2010 wk1             | 155 |
| 257 | Females 01-14 all-cause excess deaths, fm 2019 wk1             | 155 |
| 258 | Females 01-14 all-cause excess deaths, fm 2020 wk1             | 156 |
| 259 | Females 01-14 all-cause excess deaths (-COVID19), fm 2010 wk1  | 156 |
| 260 | Females 01-14 all-cause excess deaths (-COVID19), fm 2019 wk1  | 157 |
| 261 | Females 01-14 all-cause excess deaths (-COVID19), fm 2020 wk1  | 157 |
| 262 | Females 15-44 mortality time trend and model, fm 2010 wk1      | 158 |
| 263 | Females 15-44 mortality time trend and model, fm 2019 wk1      | 159 |
| 264 | Females 15-44 mortality time trend and model, fm 2020 wk1      | 159 |
| 265 | Females 15-44 all-cause excess deaths, fm 2010 wk1             | 160 |
| 266 | Females 15-44 all-cause excess deaths, fm 2019 wk1             | 160 |
| 267 | Females 15-44 all-cause excess deaths, fm 2020 wk1             | 161 |
| 268 | Females 15-44 all-cause excess deaths (-COVID19), fm 2010 wk1  | 161 |
| 269 | Females 15-44 all-cause excess deaths (-COVID19), fm 2019 wk1  | 162 |
| 270 | Females 15-44 all-cause excess deaths (-COVID19), fm 2020 wk1  | 162 |
| 271 | Females 45-64 mortality time trend and model, fm 2010 wk1      | 163 |
| 272 | Females 45-64 mortality time trend and model, fm 2019 wk1      | 164 |
| 273 | Females 45-64 mortality time trend and model, fm 2020 wk1      | 164 |
| 274 | Females 45-64 all-cause excess deaths, fm 2010 wk1             | 165 |
| 275 | Females 45-64 all-cause excess deaths, fm 2019 wk1             | 165 |
| 276 | Females 45-64 all-cause excess deaths, fm 2020 wk1             | 166 |
| 277 | Females 45-64 all-cause excess deaths (-COVID19), fm 2010 wk1  | 166 |
| 278 | Females 45-64 all-cause excess deaths (-COVID19), fm 2019 wk1  | 167 |
| 279 | Females 45-64 all-cause excess deaths (-COVID19), fm 2020 wk1  | 167 |
| 280 | Females 65-74 mortality time trend and model, fm 2010 wk1      | 168 |
| 281 | Females 65-74 mortality time trend and model, fm 2019 wk1      | 169 |
| 282 | Females 65-74 mortality time trend and model, fm 2020 wk1      | 169 |
| 283 | Females 65-74 all-cause excess deaths, fm 2010 wk1             | 170 |
| 284 | Females 65-74 all-cause excess deaths, fm 2019 wk1             | 170 |
| 285 | Females 65-74 all-cause excess deaths, fm 2020 wk1             | 171 |
| 286 | Females 65-74 all-cause excess deaths (-COVID19), fm 2010 wk1  | 171 |
| 287 | Females 65-74 all-cause excess deaths (-COVID19), fm 2019 wk1  | 172 |
| 288 | Females 65-74 all-cause excess deaths (-COVID19), fm 2020 wk1  | 172 |
| 289 | Females 75-84 mortality time trend and model, fm 2010 wk1      | 173 |
| 290 | Females 75-84 mortality time trend and model, fm 2019 wk1      | 174 |
| 291 | Females 75-84 mortality time trend and model, fm 2020 wk1      | 174 |
| 292 | Females 75-84 all-cause excess deaths, fm 2010 wk1             | 175 |
| 293 | Females 75-84 all-cause excess deaths, fm 2019 wk1             | 175 |
| 294 | Females 75-84 all-cause excess deaths, fm 2020 wk1             | 176 |
| 295 | Females 75-84 all-cause excess deaths (-COVID19), fm 2010 wk1  | 176 |

|     |                                                               |     |
|-----|---------------------------------------------------------------|-----|
| 296 | Females 75-84 all-cause excess deaths (–COVID19), fm 2019 wk1 | 177 |
| 297 | Females 75-84 all-cause excess deaths (–COVID19), fm 2020 wk1 | 177 |
| 298 | Females 85+ mortality time trend and model, fm 2010 wk1 . . . | 178 |
| 299 | Females 85+ mortality time trend and model, fm 2019 wk1 . . . | 179 |
| 300 | Females 85+ mortality time trend and model, fm 2020 wk1 . . . | 179 |
| 301 | Females 85+ all-cause excess deaths, fm 2010 wk1 . . . . .    | 180 |
| 302 | Females 85+ all-cause excess deaths, fm 2019 wk1 . . . . .    | 180 |
| 303 | Females 85+ all-cause excess deaths, fm 2020 wk1 . . . . .    | 181 |
| 304 | Females 85+ all-cause excess deaths (–COVID19), fm 2010 wk1   | 181 |
| 305 | Females 85+ all-cause excess deaths (–COVID19), fm 2019 wk1   | 182 |
| 306 | Females 85+ all-cause excess deaths (–COVID19), fm 2020 wk1   | 182 |

# 1 England-Wales aggregates

## 1.1 Time trend

Figure 1: Mortality time trend, from 2010 week 1

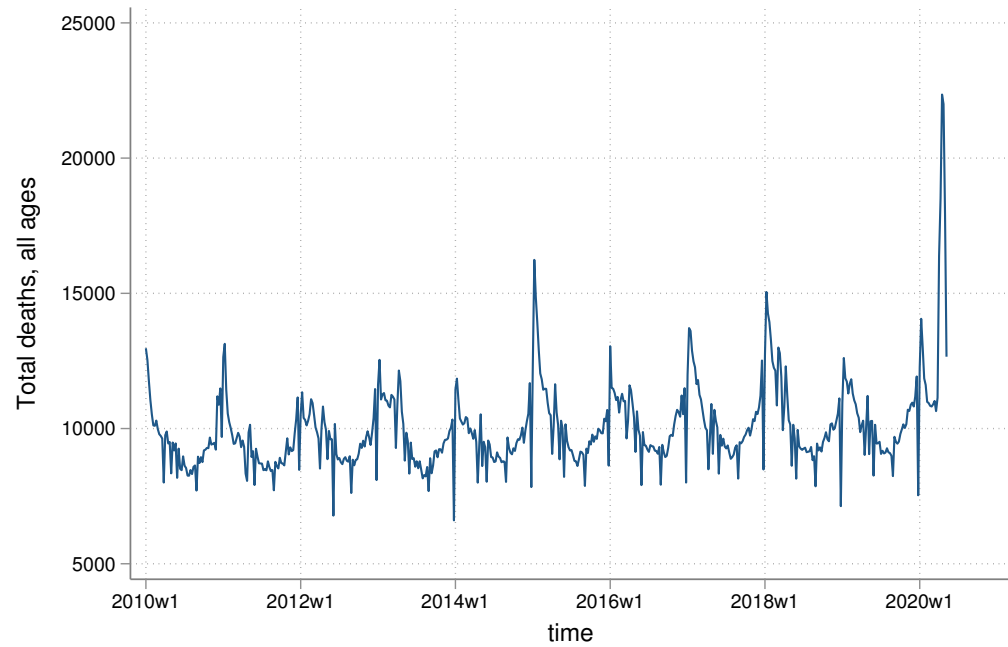



Figure 2: Mortality time trend, from 2019 week 1

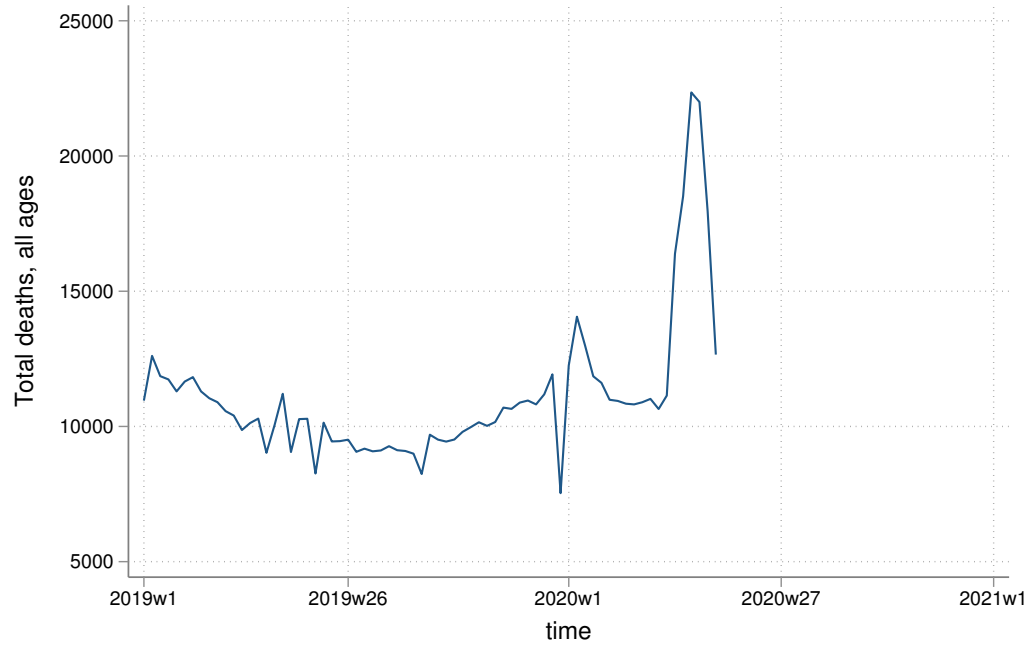

Figure 3: Mortality time trend, from 2020 week 1

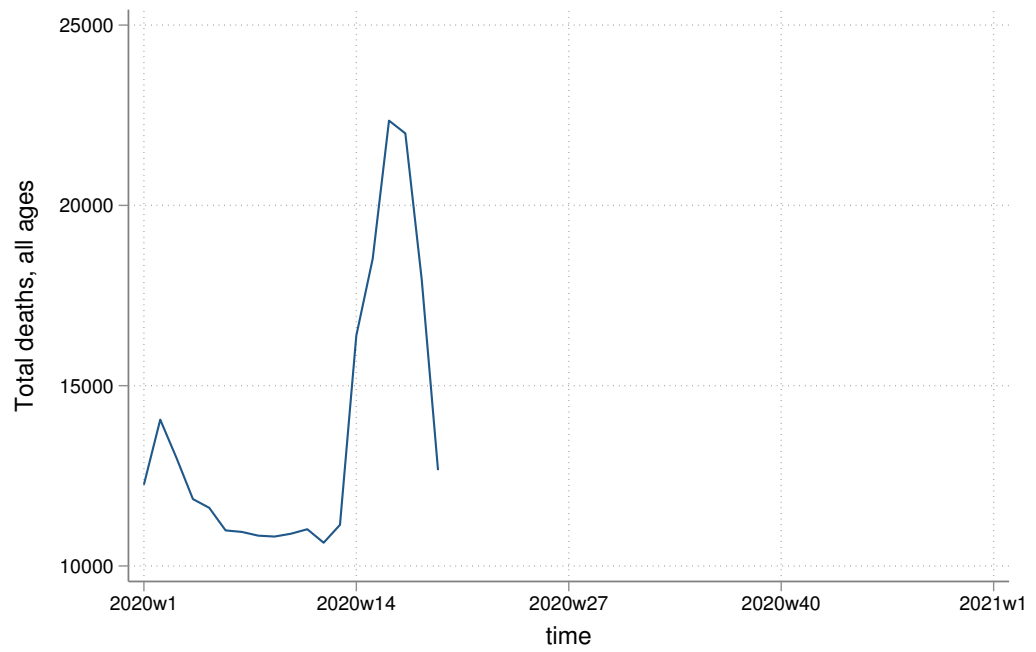

## 1.2 Time trend and Negative Binomial Regression model

Figure 4: Mortality time trend and model, from 2010 week 1

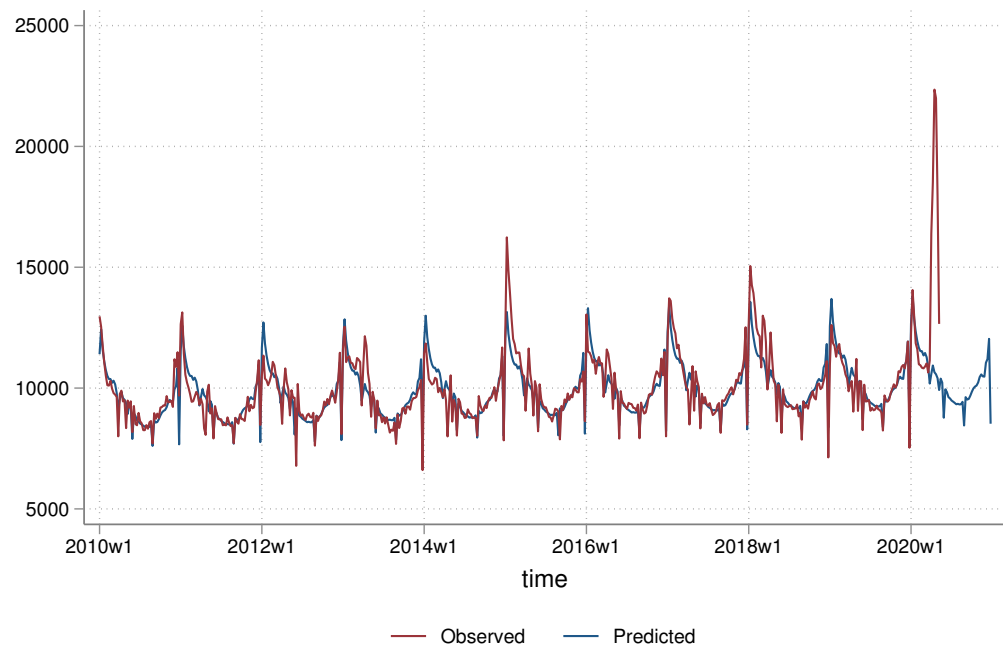

Figure 5: Mortality time trend and model, from 2019 week 1

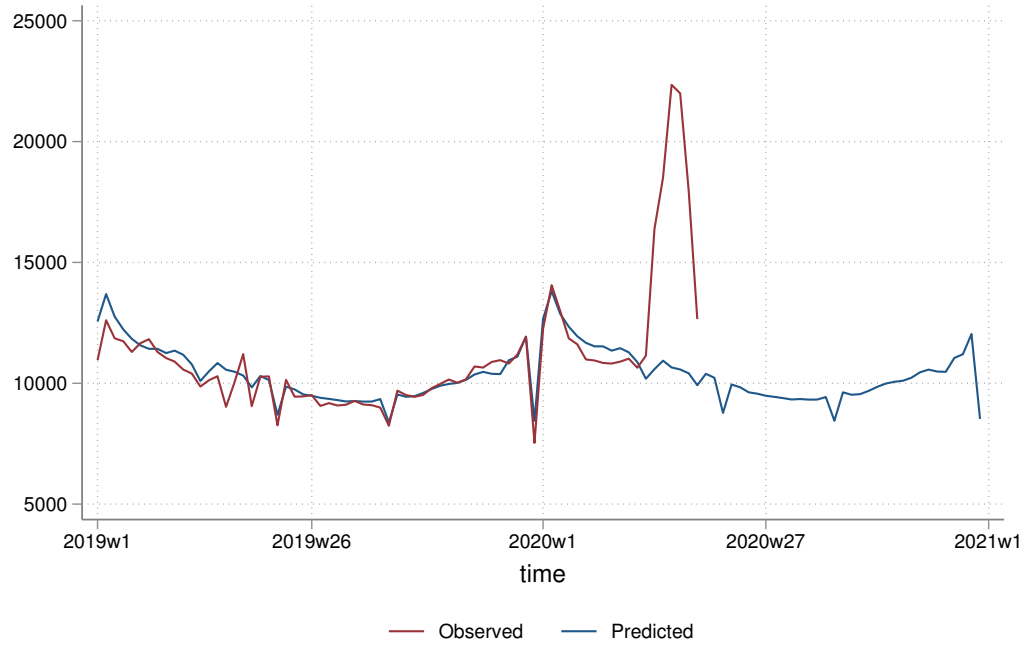

Figure 6: Mortality time trend and model, from 2020 week 1

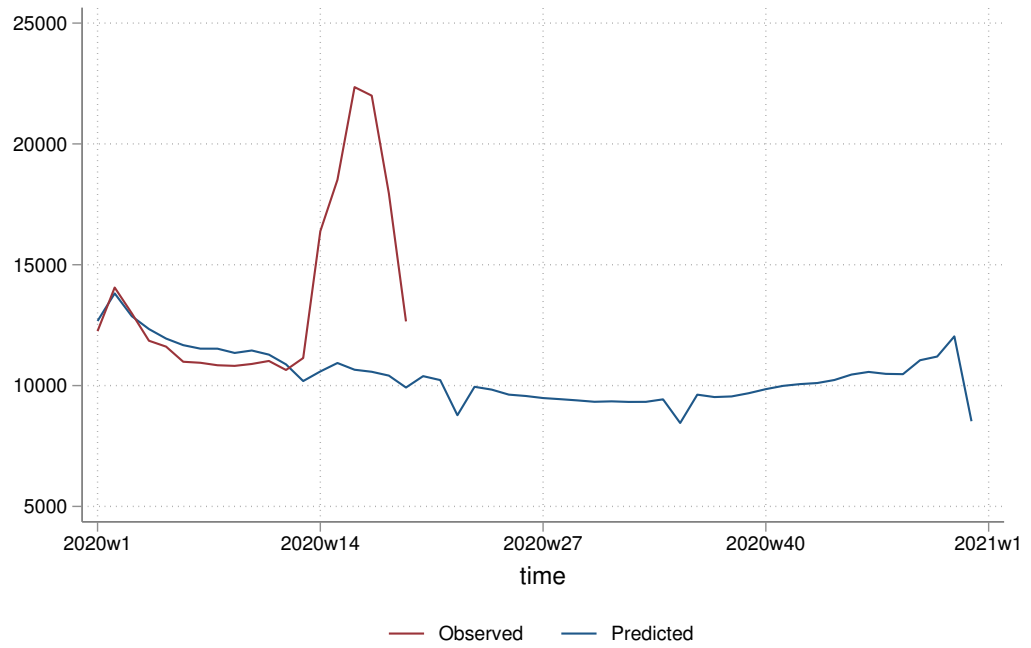

### 1.3 Excess number of deaths: all causes

Figure 7: All-cause excess deaths, from 2010 week 1

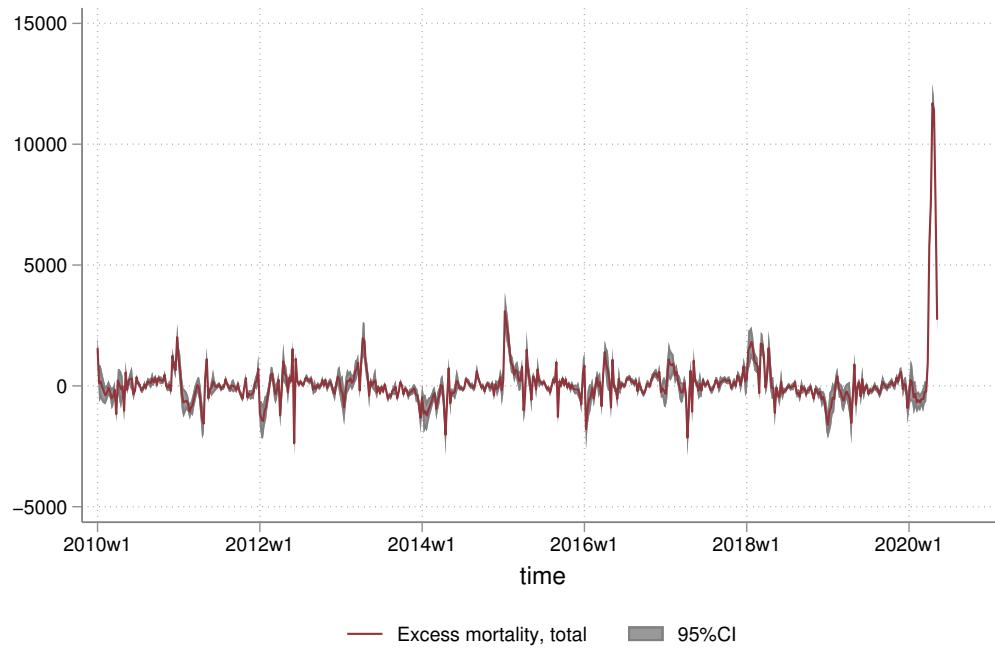

Figure 8: All-cause excess deaths, from 2019 week 1

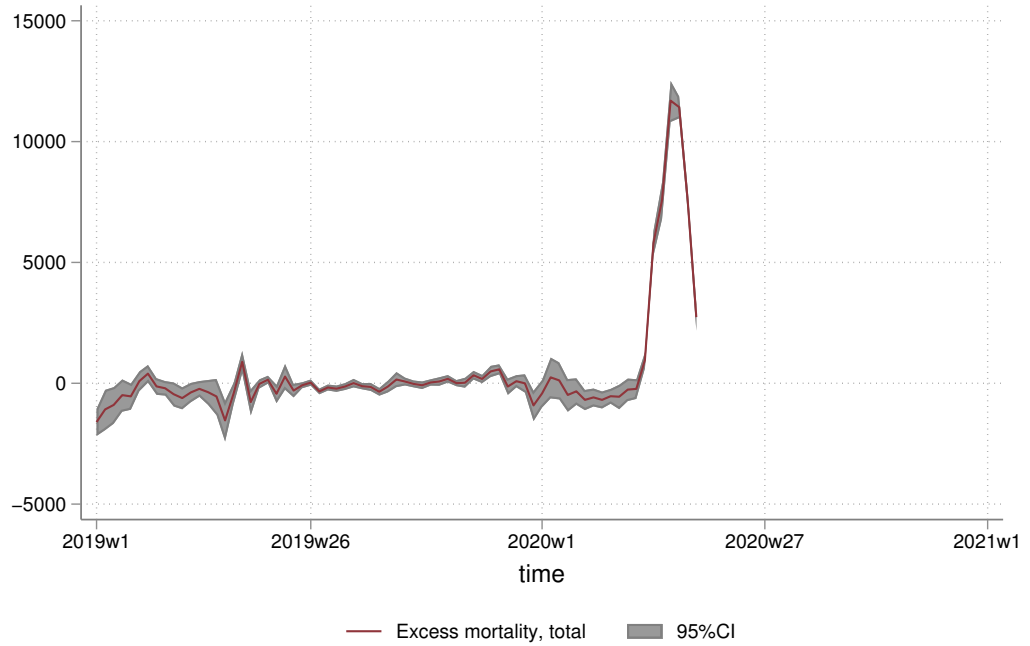

Figure 9: All-cause excess deaths, from 2020 week 1

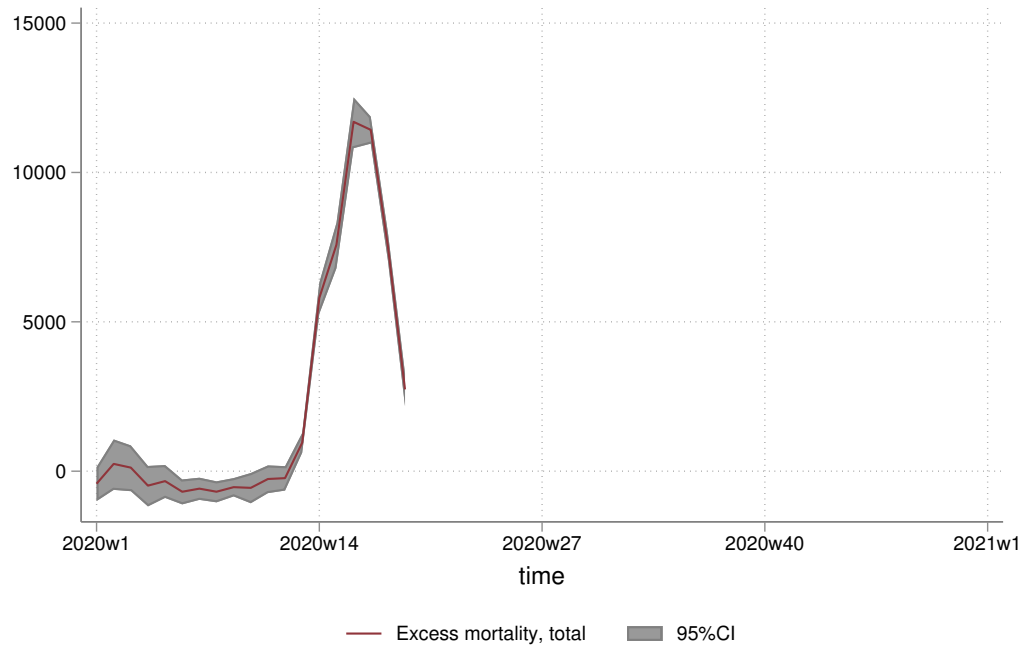

#### 1.4 Excess number of deaths: all causes minus COVID19 deaths

Excluding deaths where COVID19 was mentioned in the death certificate (ICD10 U07.1 and U07.2). A condition mentioned in the death certificate may be the main reason or a contributory reason to the cause of death.

Figure 10: All-cause excess deaths minus COVID19, from 2010 week 1

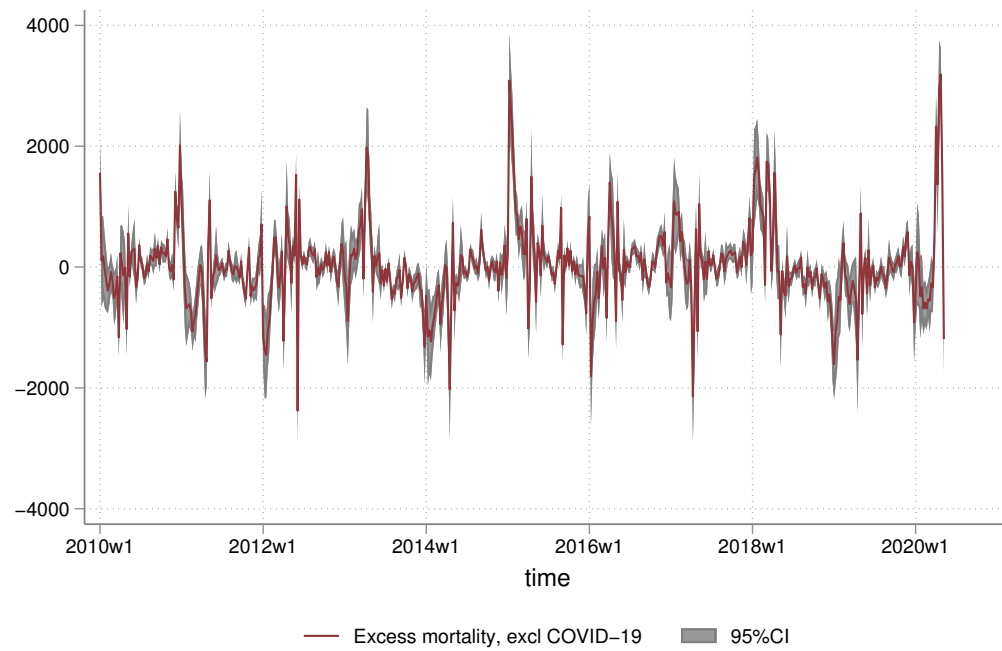

Figure 11: All-cause excess deaths minus COVID19, from 2019 week 1

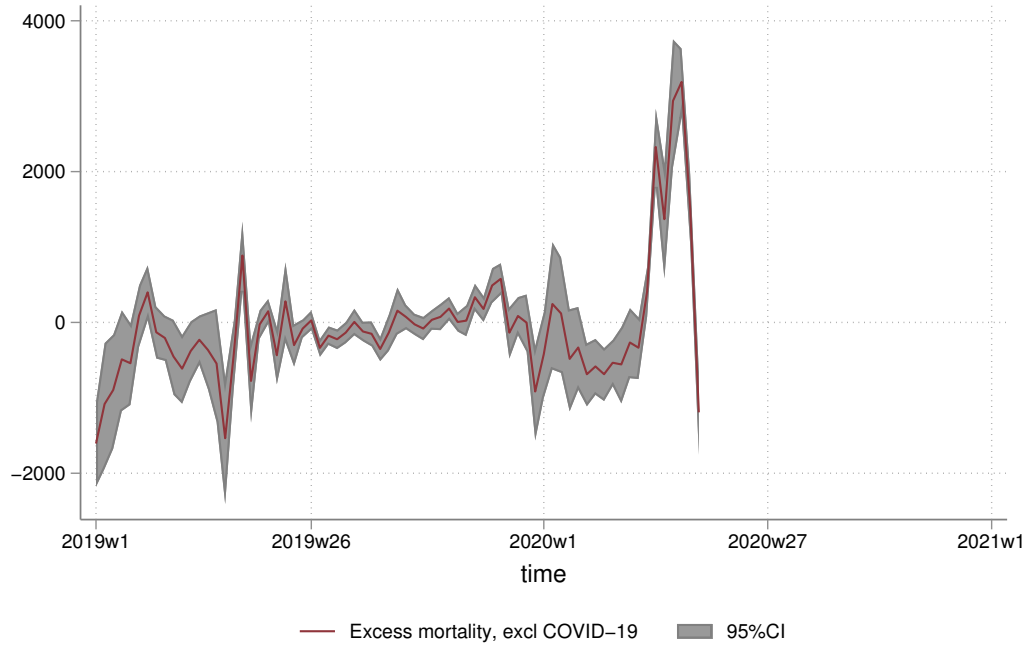

Figure 12: All-cause excess deaths minus COVID19, from 2020 week 1

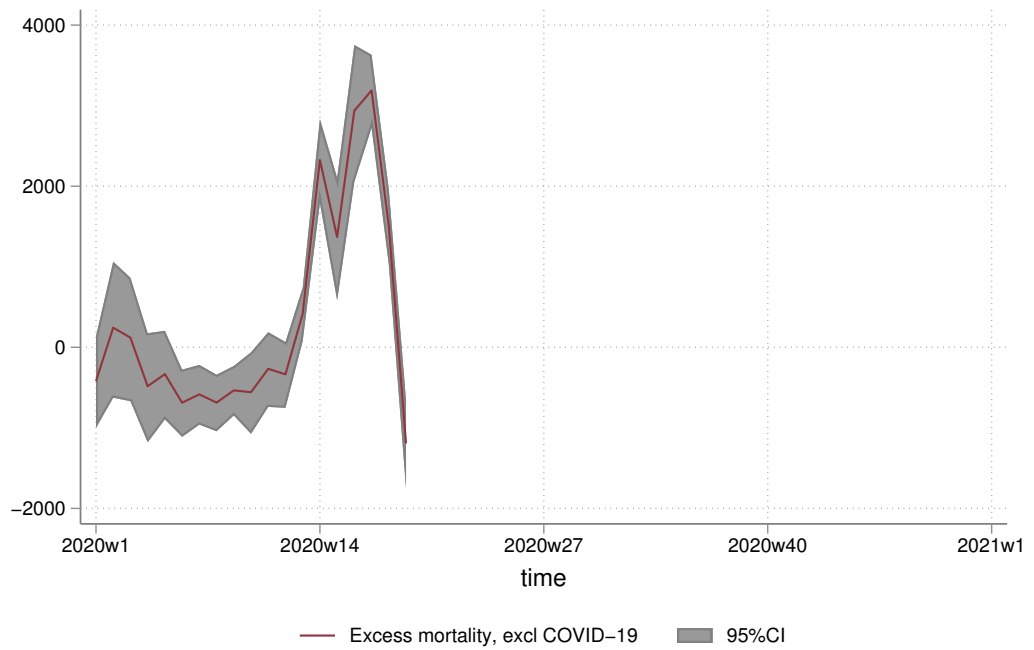

## 1.5 Excess number of deaths: all causes minus respiratory deaths

Excluding deaths where the underlying cause of death has been recorded as respiratory (ICD-10 codes J00-J99), and excluded deaths at age under 28 days. Underlying cause of death, as reported in England and Wales, is compatible with WHO recommendations using ICD rules (with small changes in 2011 and 2014), and is obtained from the death certificate. The underlying cause of death is defined by the WHO as the disease or injury that initiated the series of events that led directly to death, or the circumstances of the accident or violence that produced the fatal injury (ONS 2020).

Figure 13: All-cause excess deaths minus COVID19, from 2010 week 1

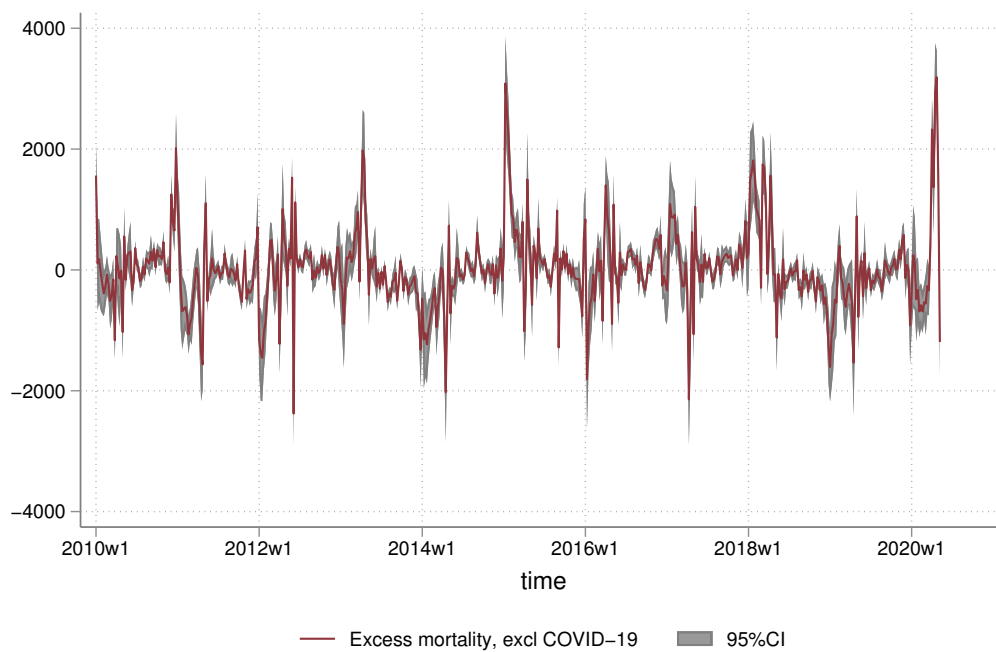



Figure 14: All-cause excess deaths minus COVID19, from 2019 week 1



Figure 15: All-cause excess deaths minus COVID19, from 2020 week 1



## 2 Regional

### 2.1 Time trends

Figure 16: Regional mortality time trends, from 2010 week 1

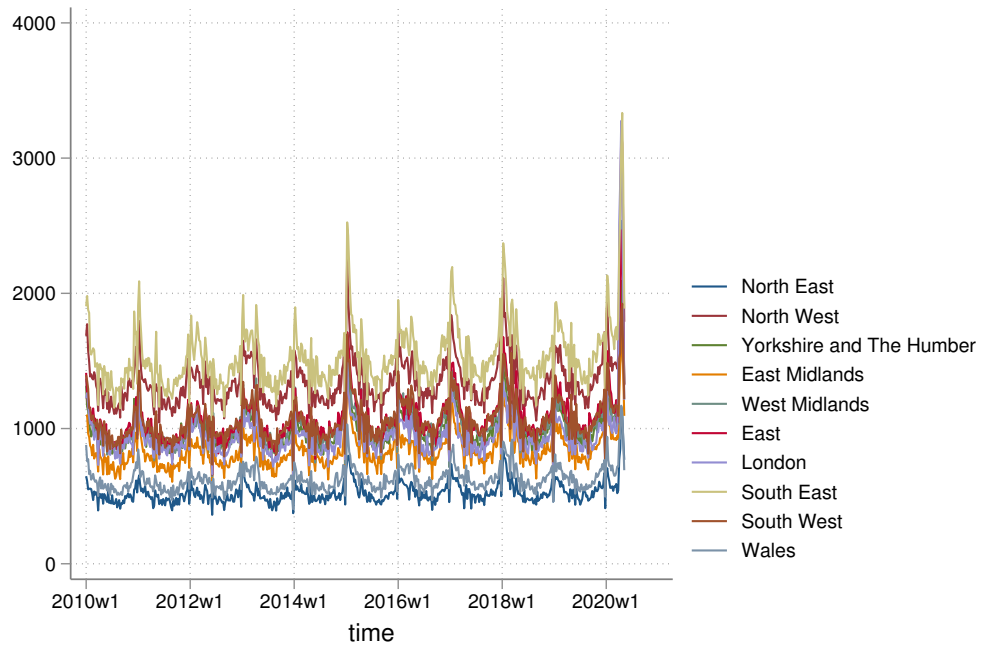

Figure 17: Regional mortality time trends, from 2019 week 1

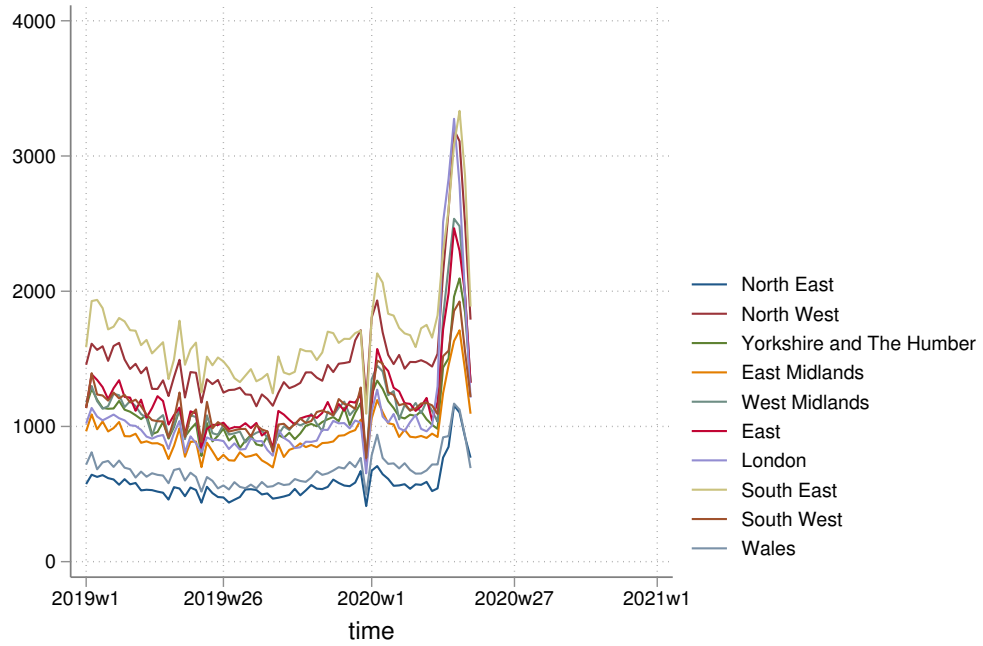

Figure 18: Regional mortality time trends, from 2020 week 1

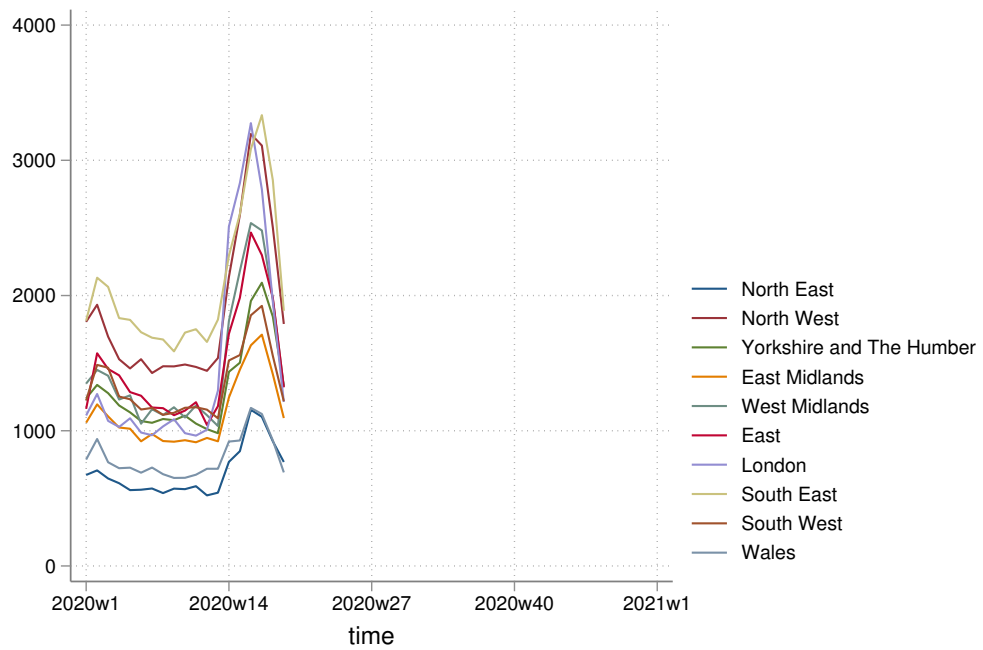

## 2.2 North East

Figure 19: NE Mortality time trend and model, from 2010 week 1

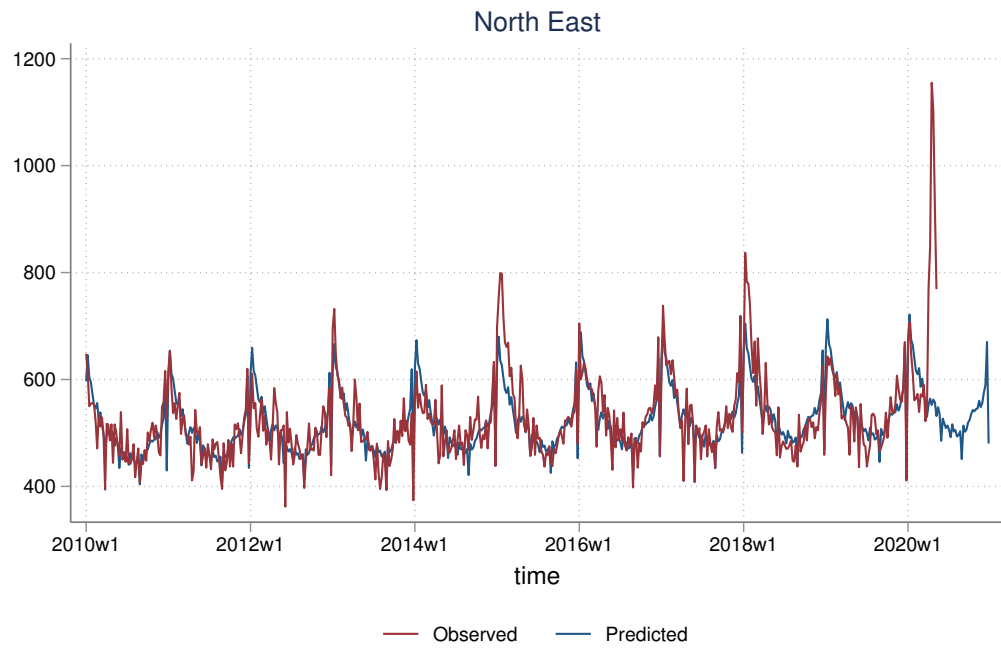

Figure 20: NE Mortality time trend and model, from 2019 week 1

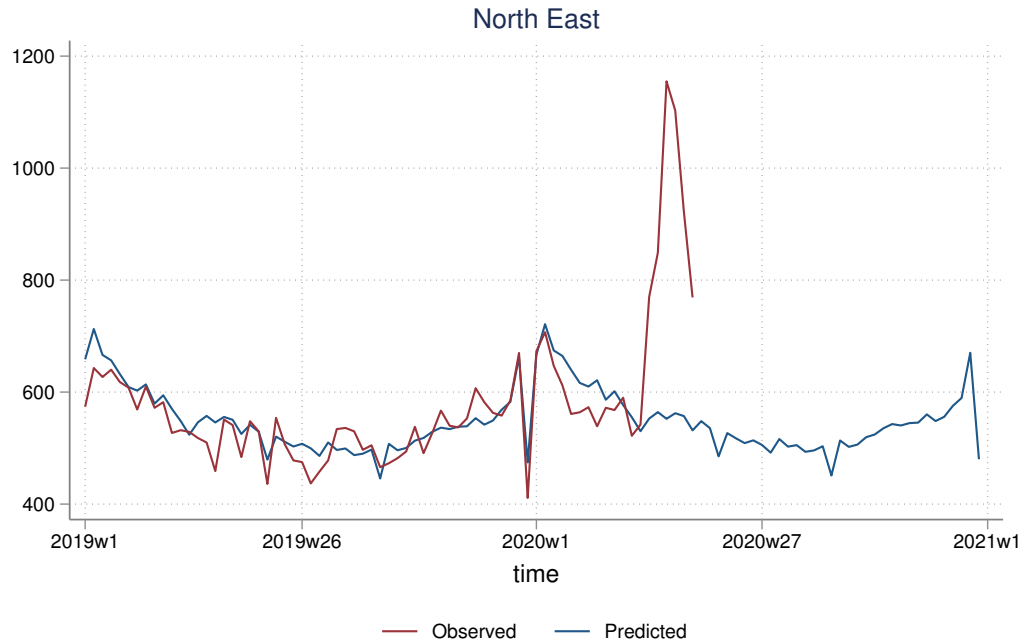

Figure 21: NE Mortality time trend and model, from 2020 week 1

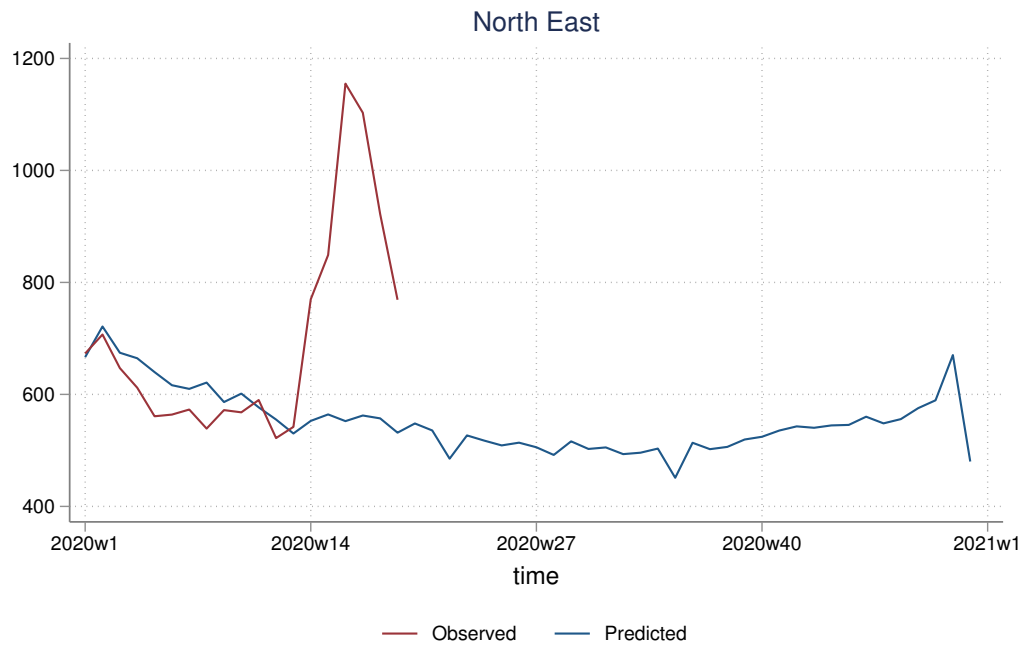

Figure 22: NE all-cause excess deaths, from 2010 week 1

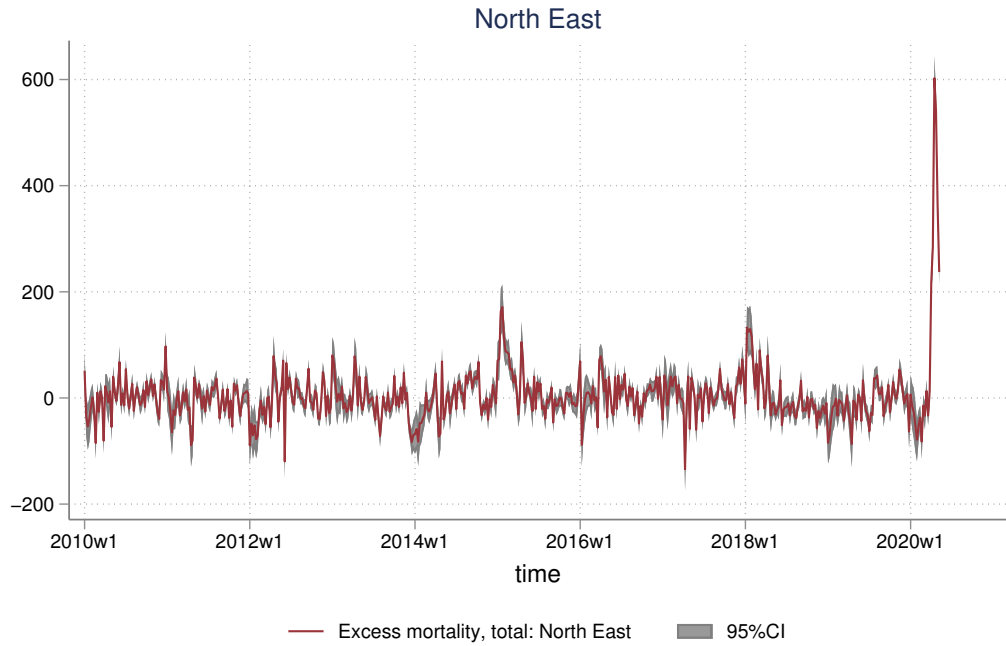

Figure 23: NE all-cause excess deaths, from 2019 week 1

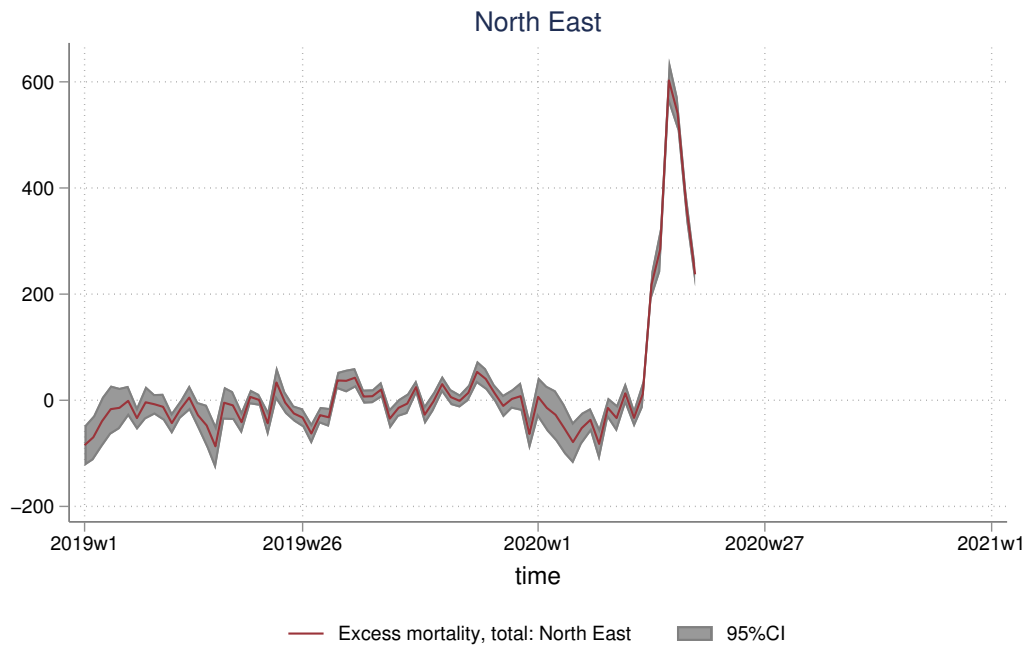

Figure 24: NE all-cause excess deaths, from 2020 week 1

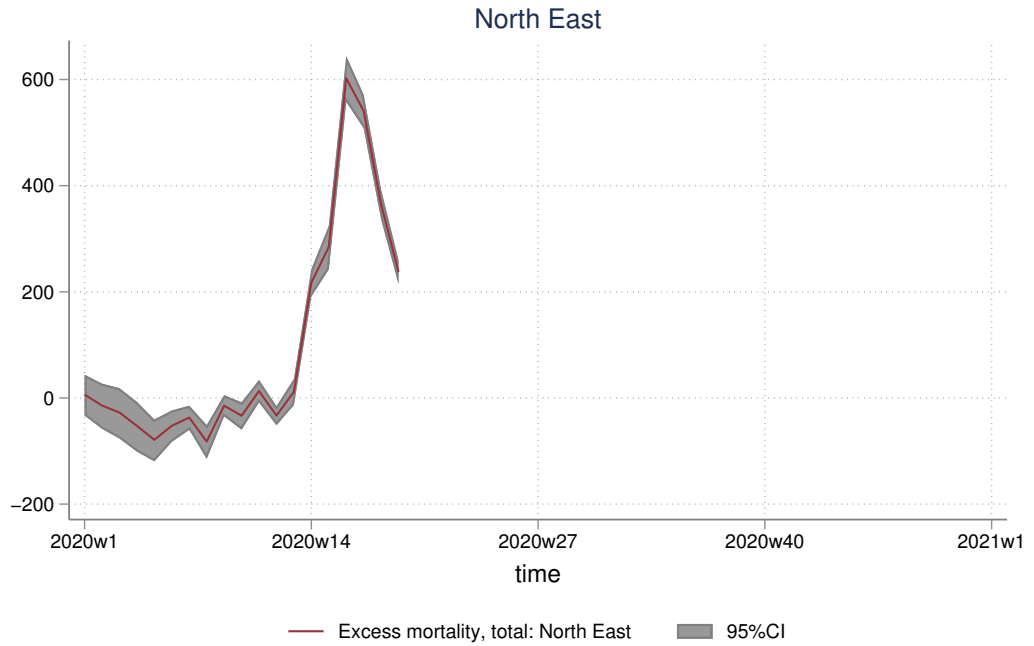

Figure 25: NE all-cause excess deaths minus COVID19, from 2010 week 1

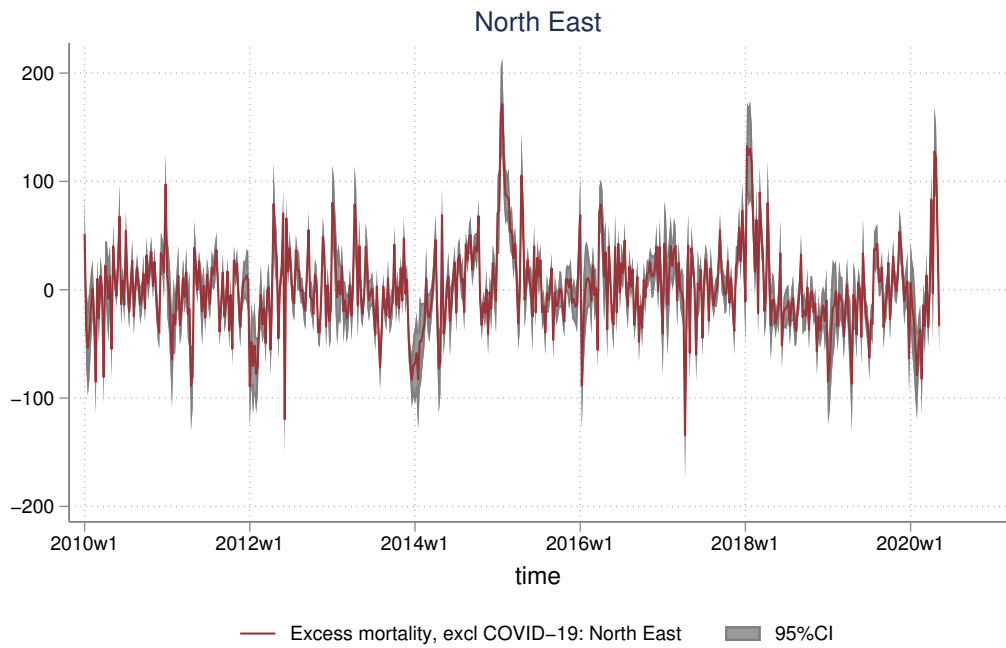

Figure 26: NE all-cause excess deaths minus COVID19, from 2019 week 1

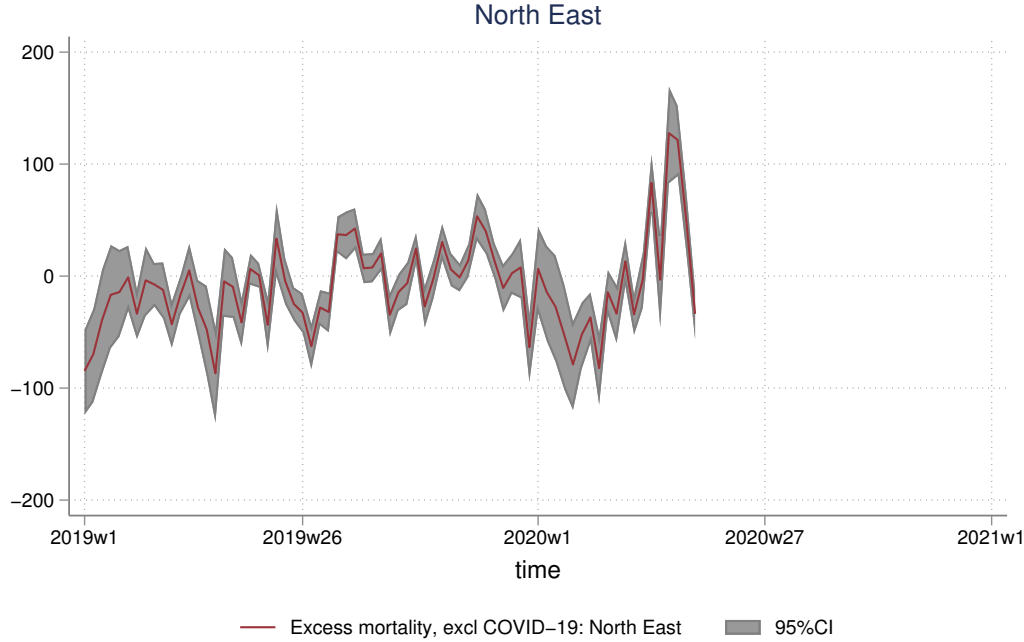

Figure 27: NE all-cause excess deaths minus COVID19, from 2020 week 1

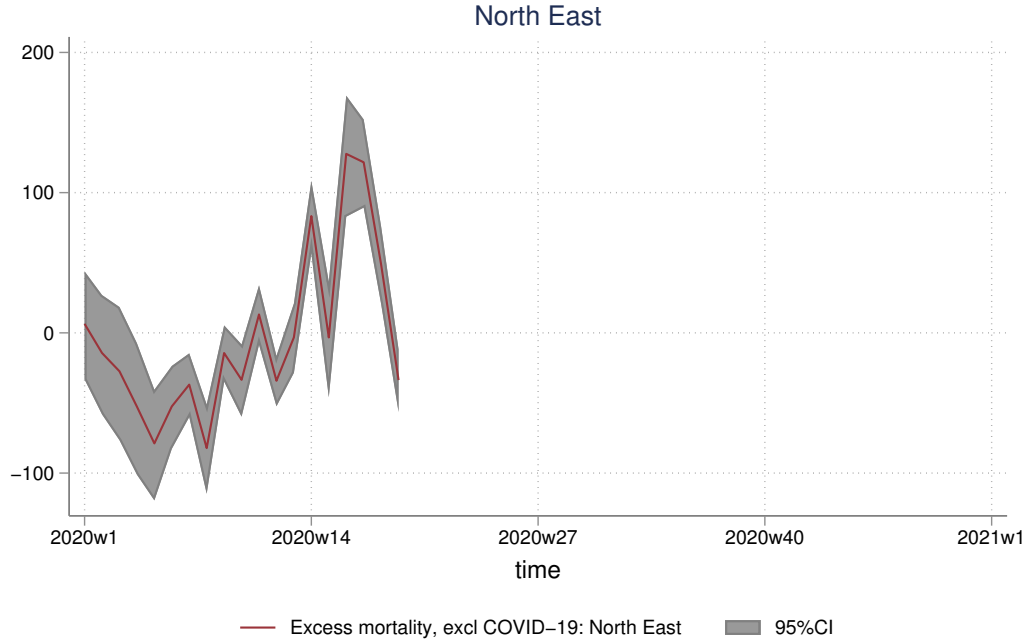



### 2.3 North West

Figure 28: NW Mortality time trend and model, from 2010 week 1

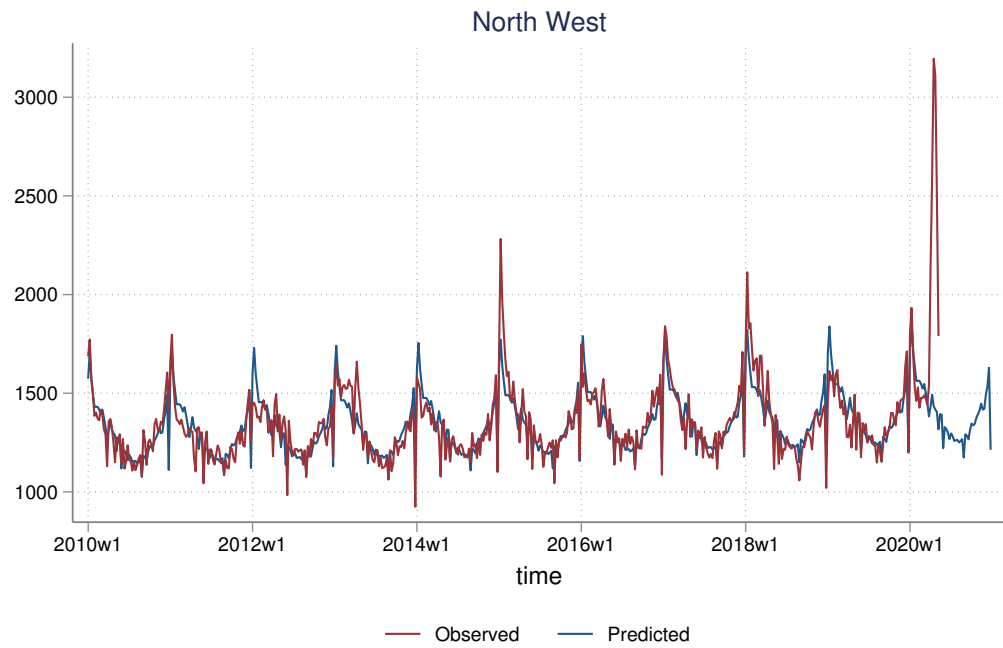

Figure 29: NW Mortality time trend and model, from 2019 week 1

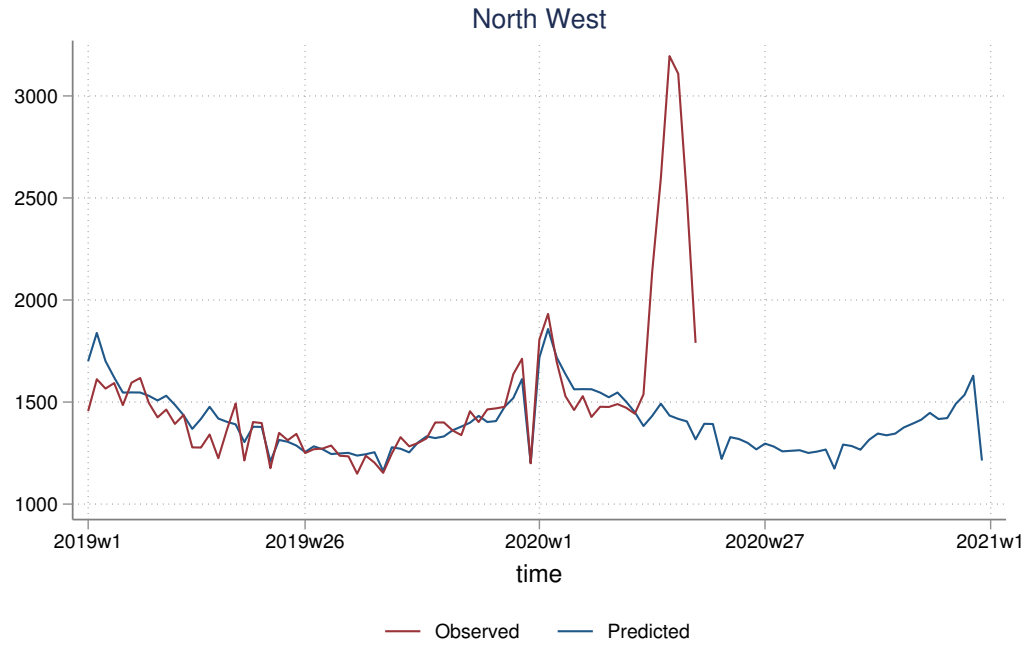

Figure 30: NW Mortality time trend and model, from 2020 week 1

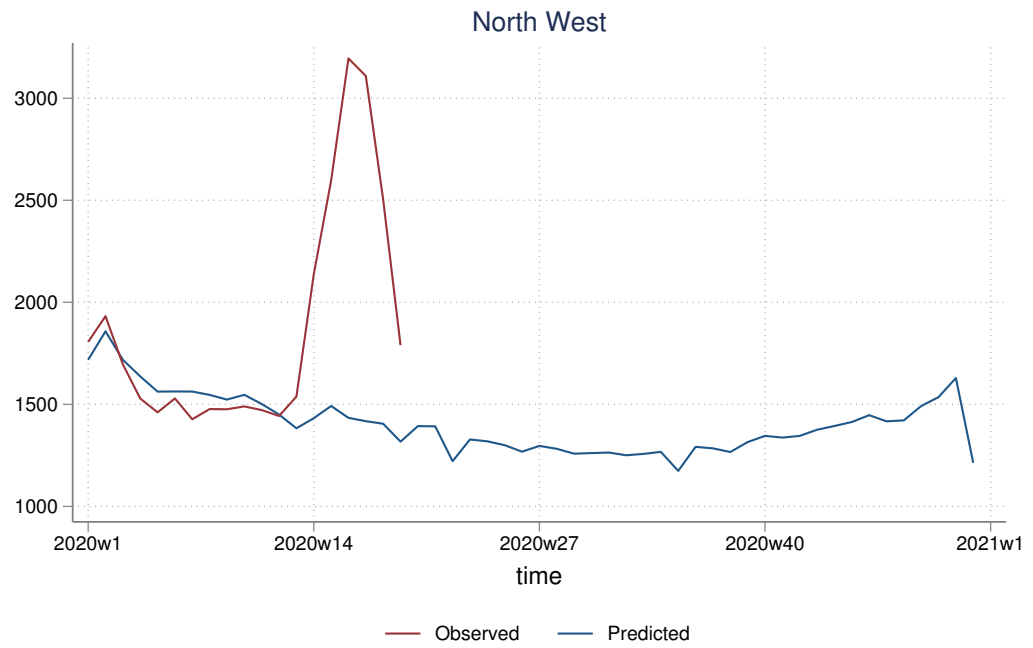

Figure 31: NW all-cause excess deaths, from 2010 week 1

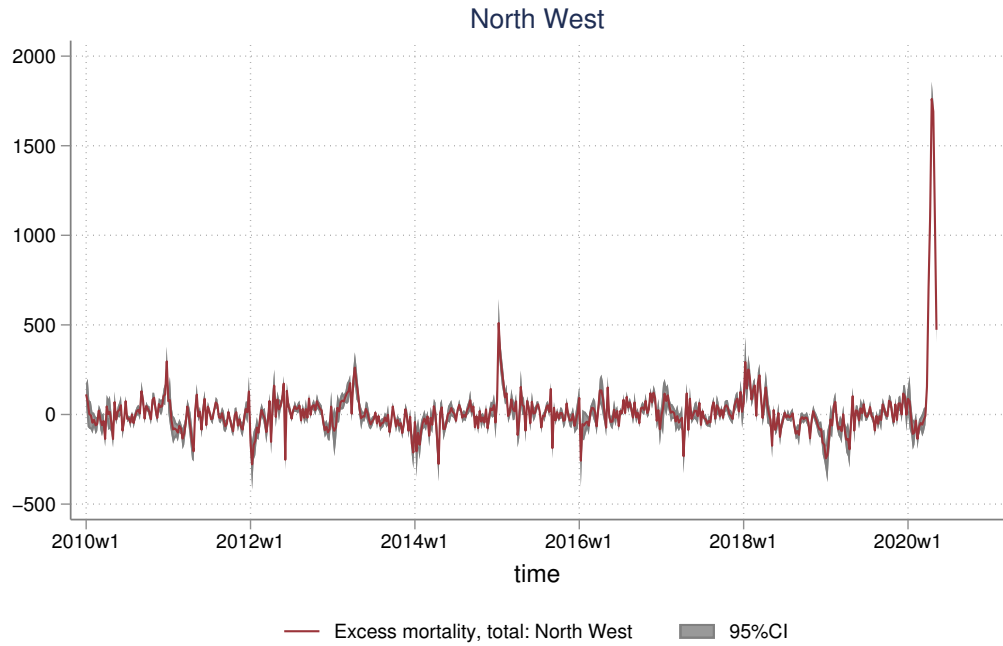

Figure 32: NW all-cause excess deaths, from 2019 week 1

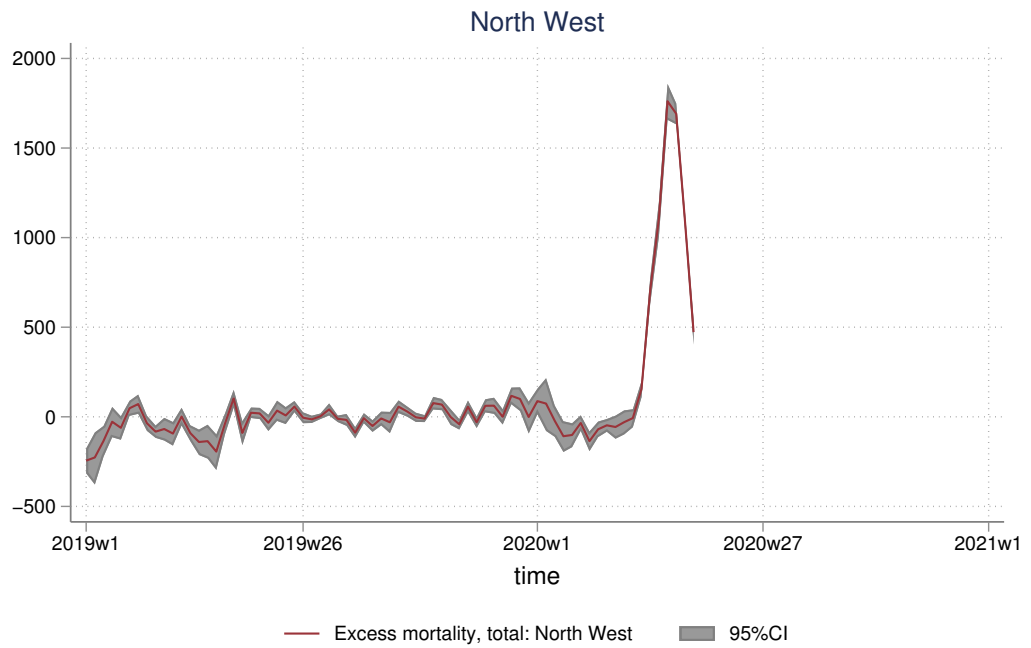

Figure 33: NW all-cause excess deaths, from 2020 week 1

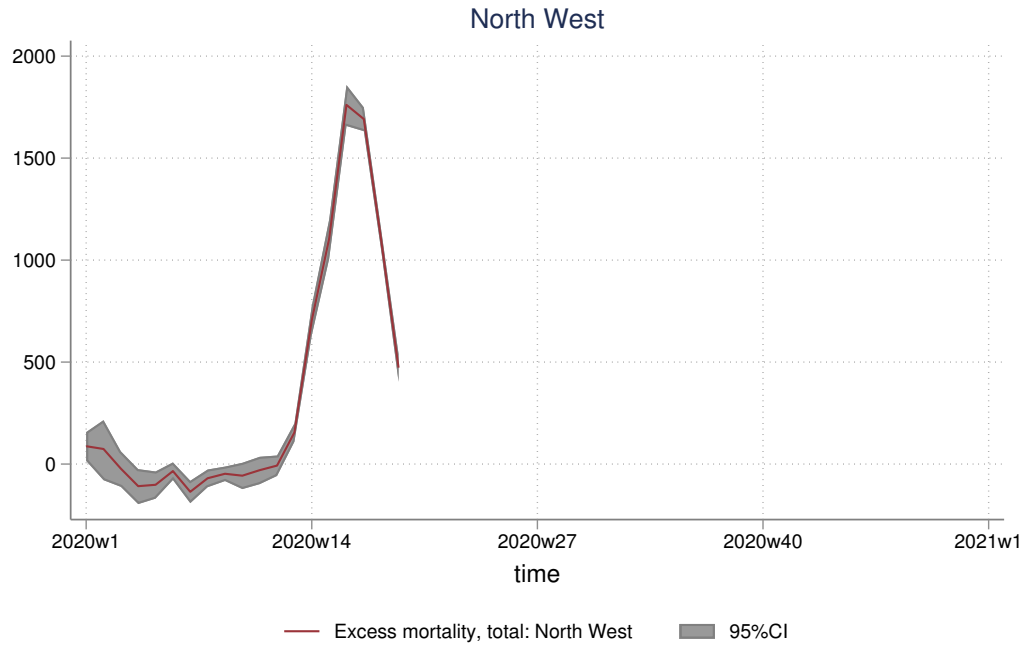

Figure 34: NW all-cause excess deaths minus COVID19, from 2010 week 1

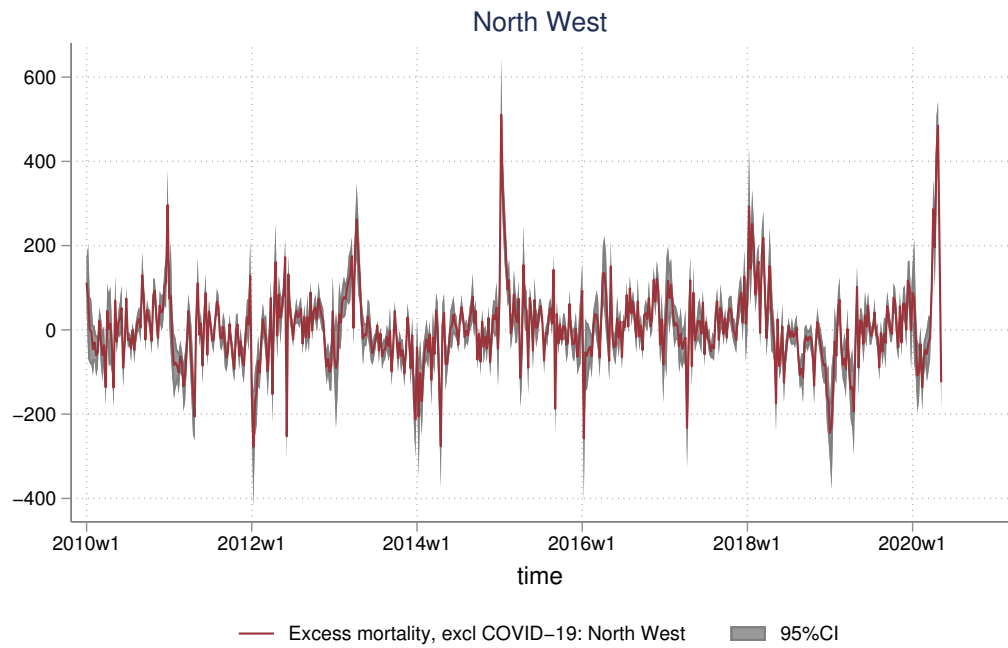

Figure 35: NW all-cause excess deaths minus COVID19, from 2019 week 1

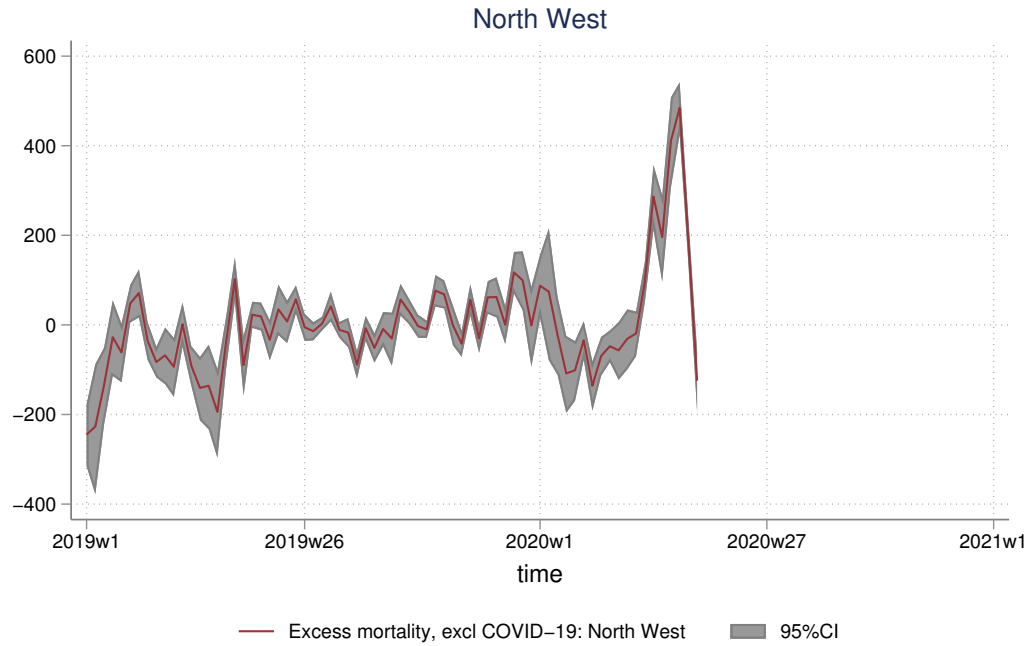

Figure 36: NW all-cause excess deaths minus COVID19, from 2020 week 1

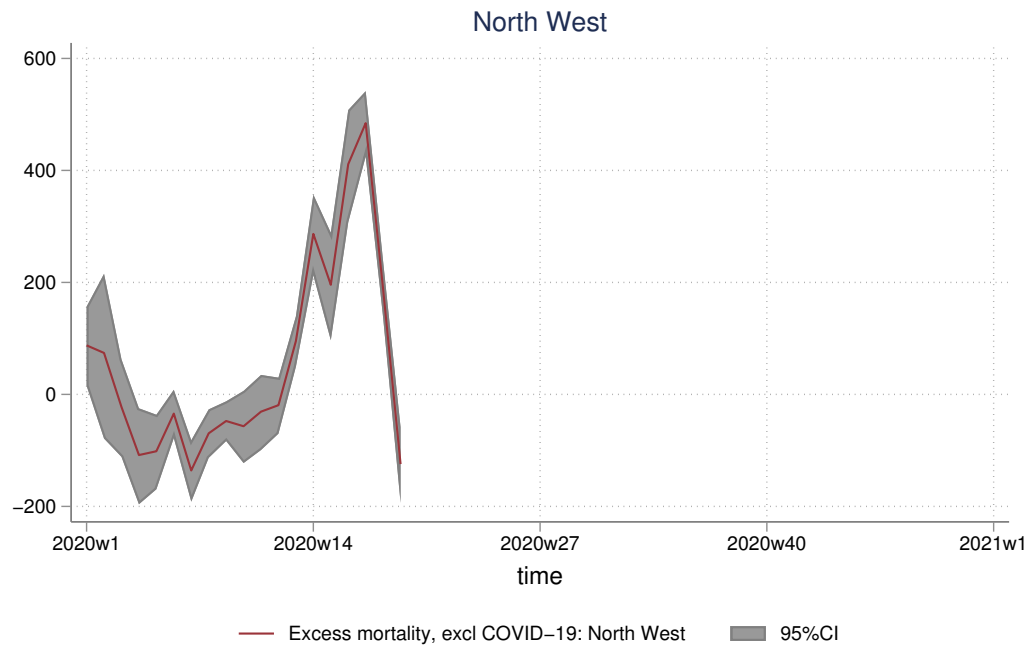

## 2.4 Yorkshire and the Humber

Figure 37: Yath Mortality time trend and model, from 2010 week 1

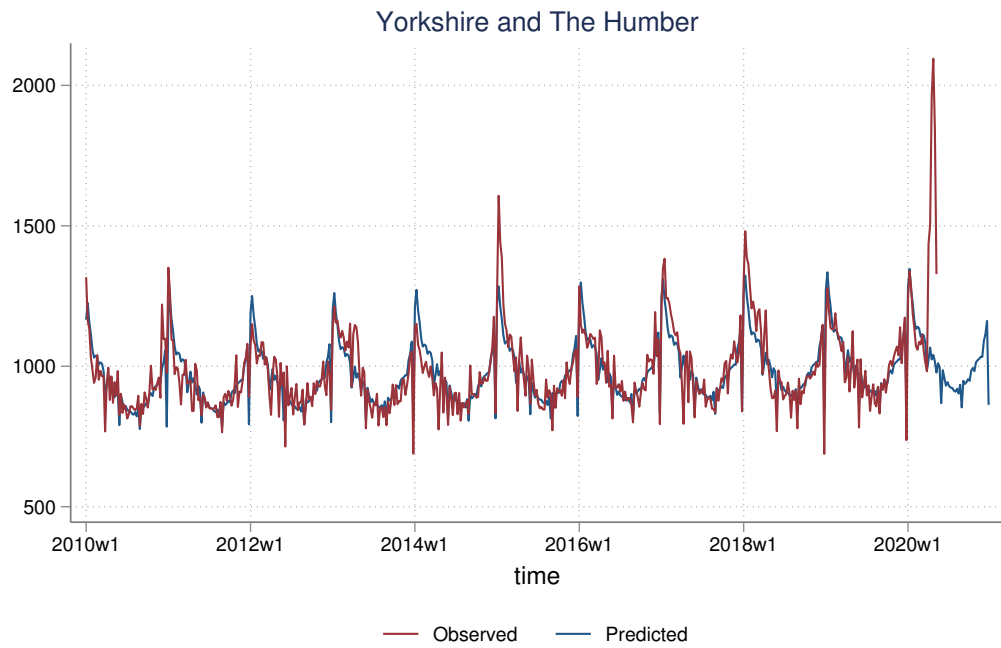

Figure 38: Yath Mortality time trend and model, from 2019 week 1

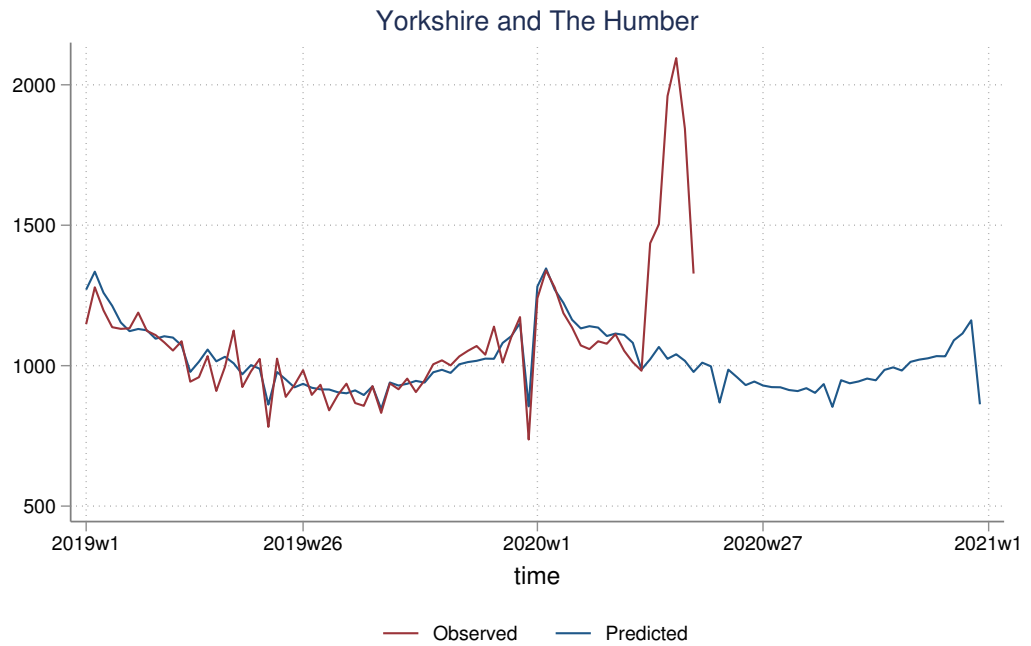

Figure 39: Yath Mortality time trend and model, from 2020 week 1

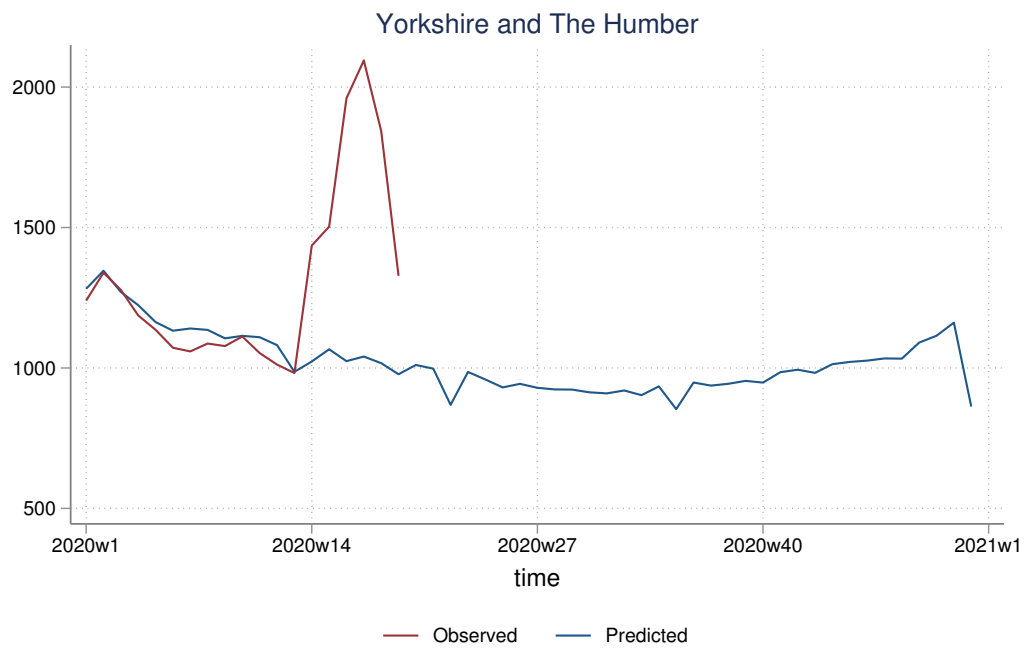

Figure 40: YatH all-cause excess deaths, from 2010 week 1

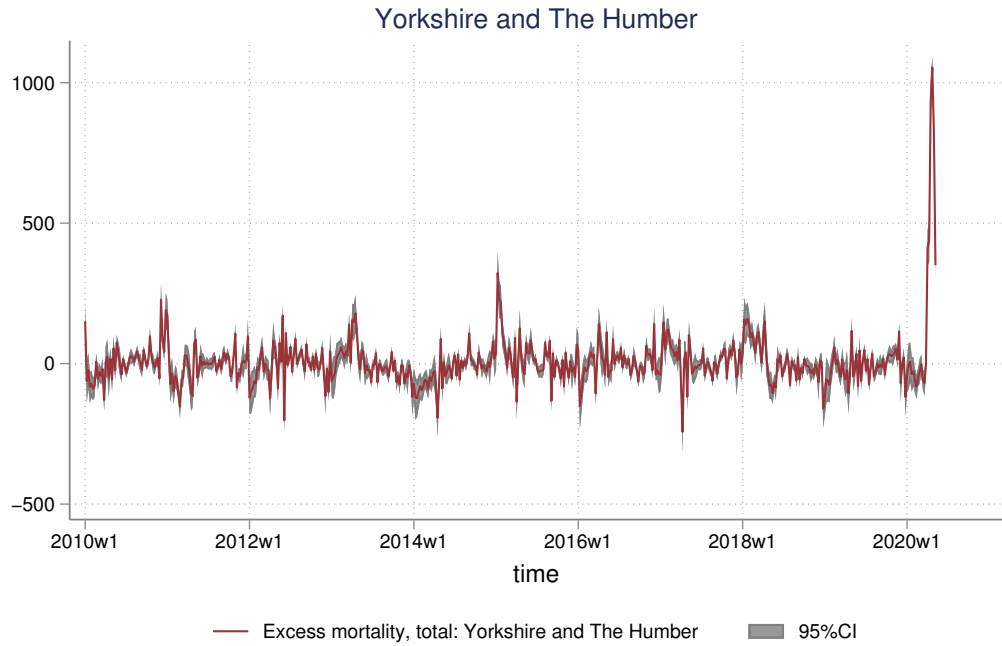

Figure 41: YatH all-cause excess deaths, from 2019 week 1

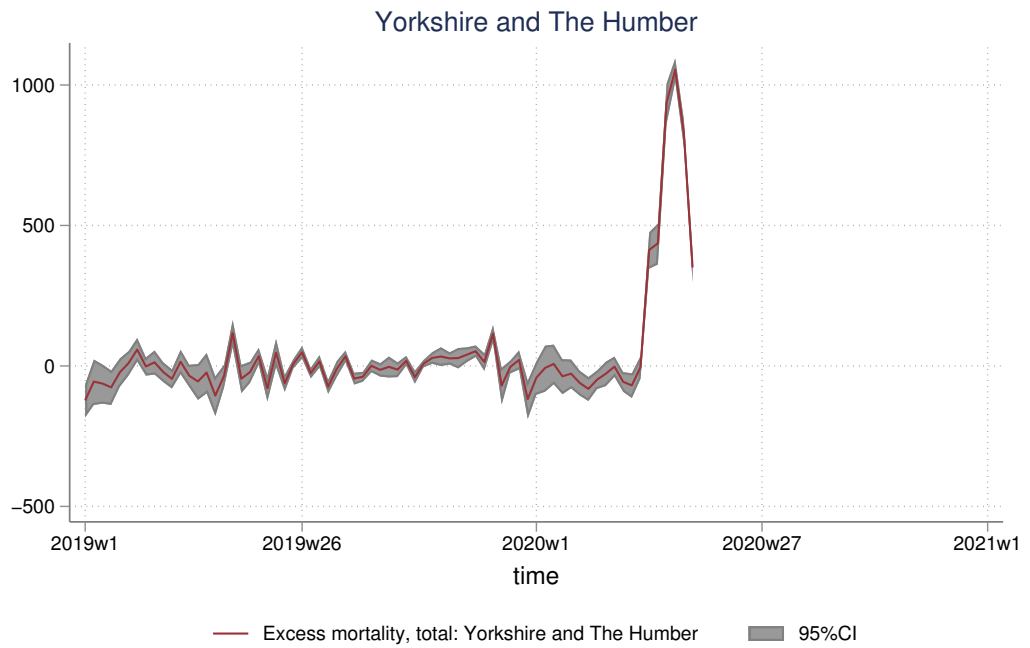



Figure 42: YatH all-cause excess deaths, from 2020 week 1

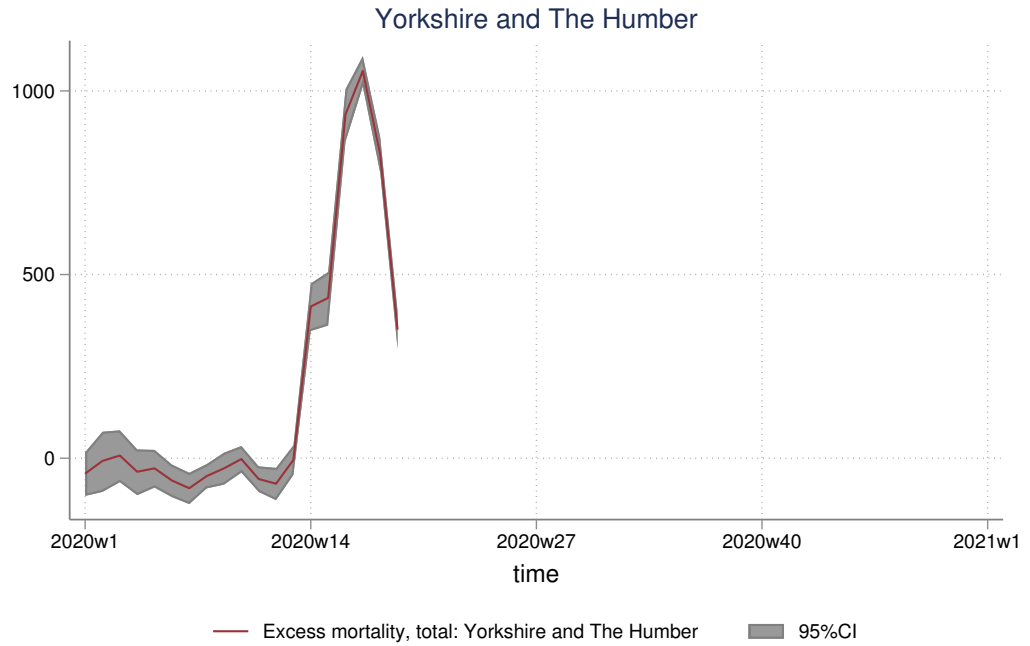

Figure 43: YatH all-cause excess deaths minus COVID19, from 2010 week 1

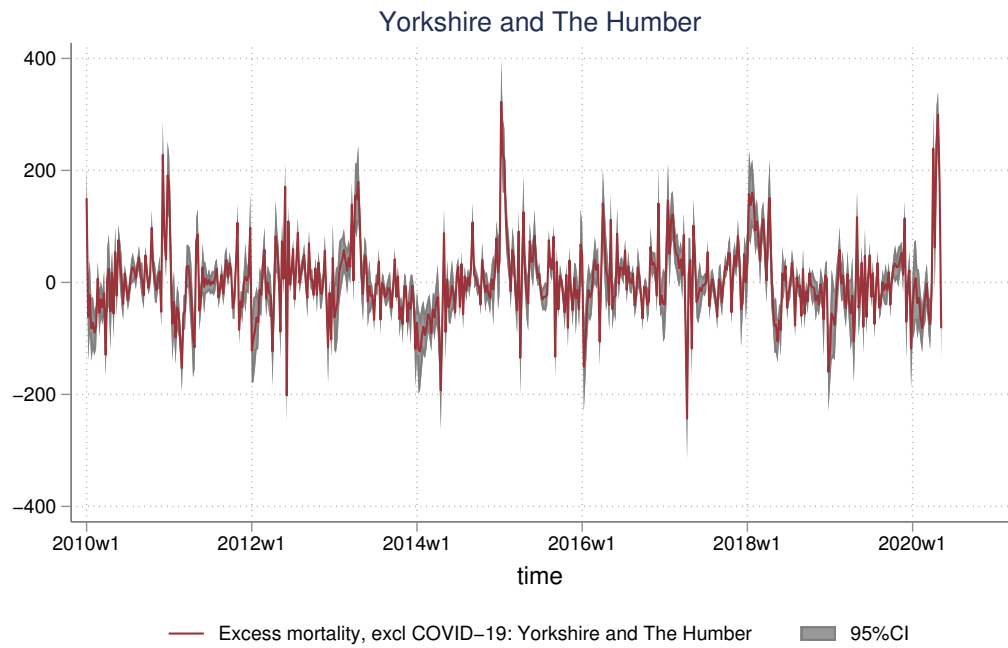

Figure 44: YatH all-cause excess deaths minus COVID19, from 2019 week 1

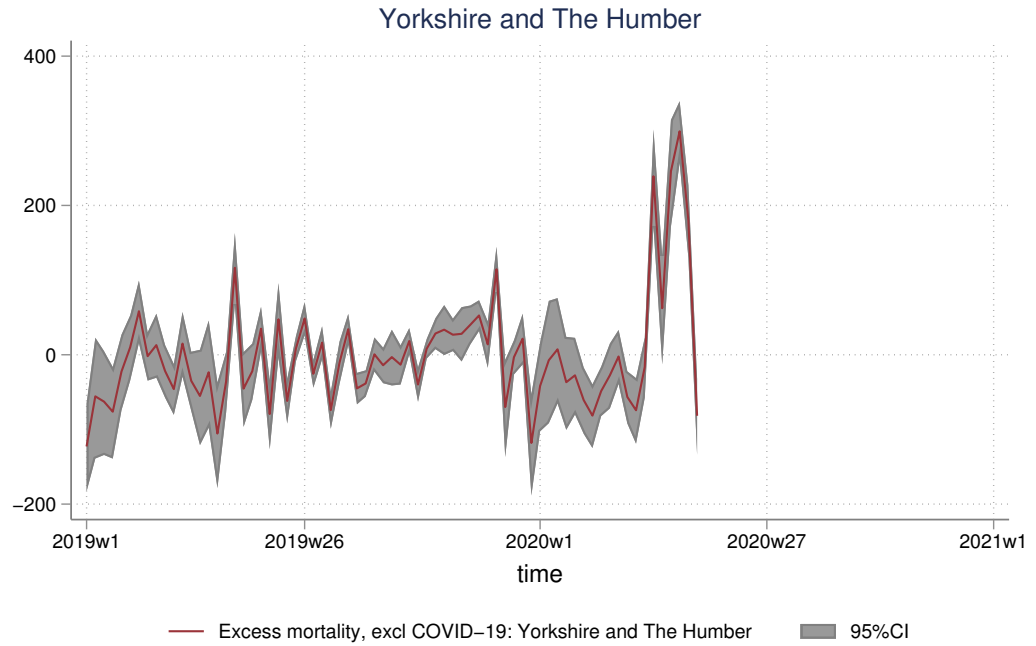

Figure 45: YatH all-cause excess deaths minus COVID19, from 2020 week 1

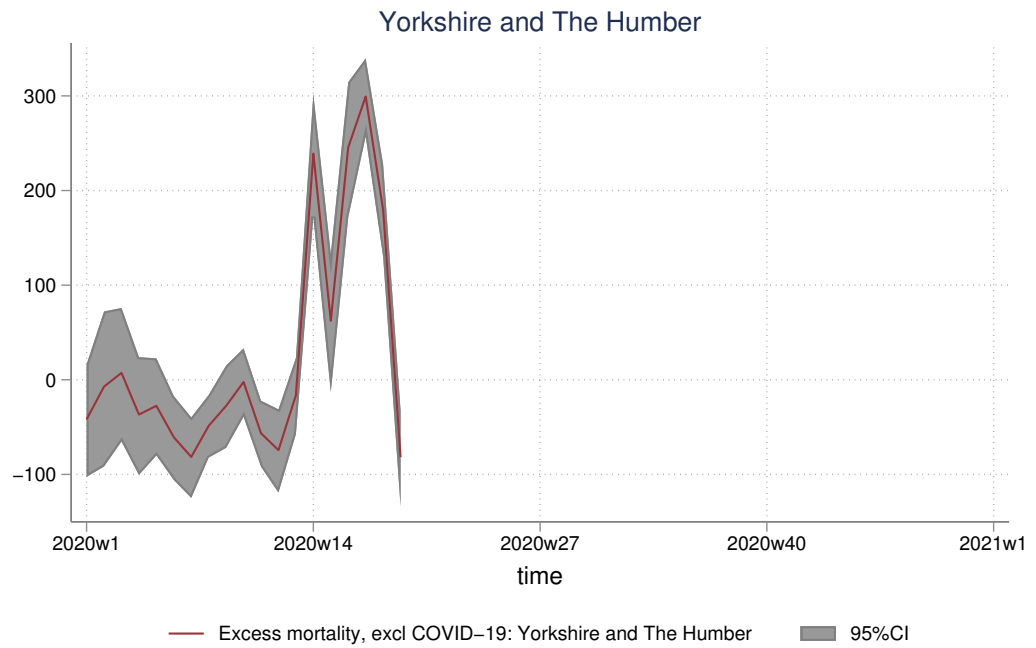

## 2.5 East Midlands

Figure 46: EMD Mortality time trend and model, from 2010 week 1

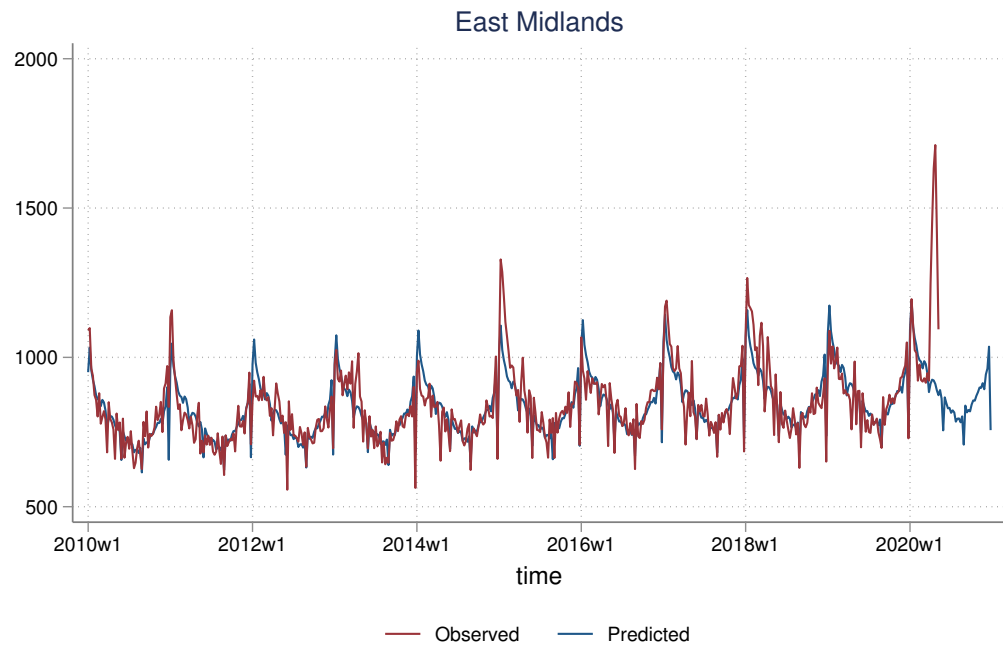

Figure 47: EMD Mortality time trend and model, from 2019 week 1

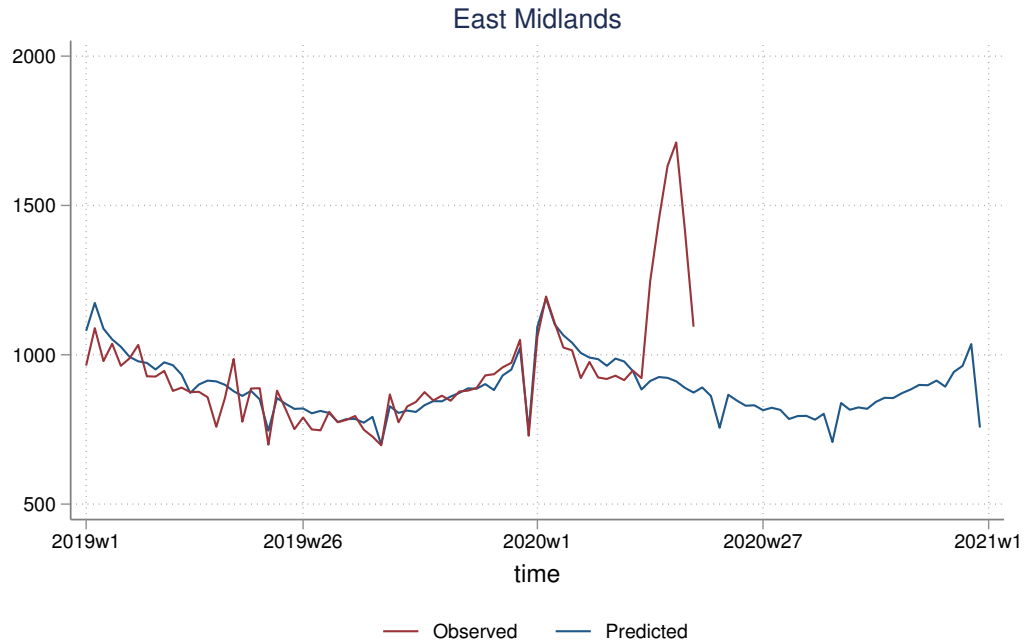

Figure 48: EMD Mortality time trend and model, from 2020 week 1

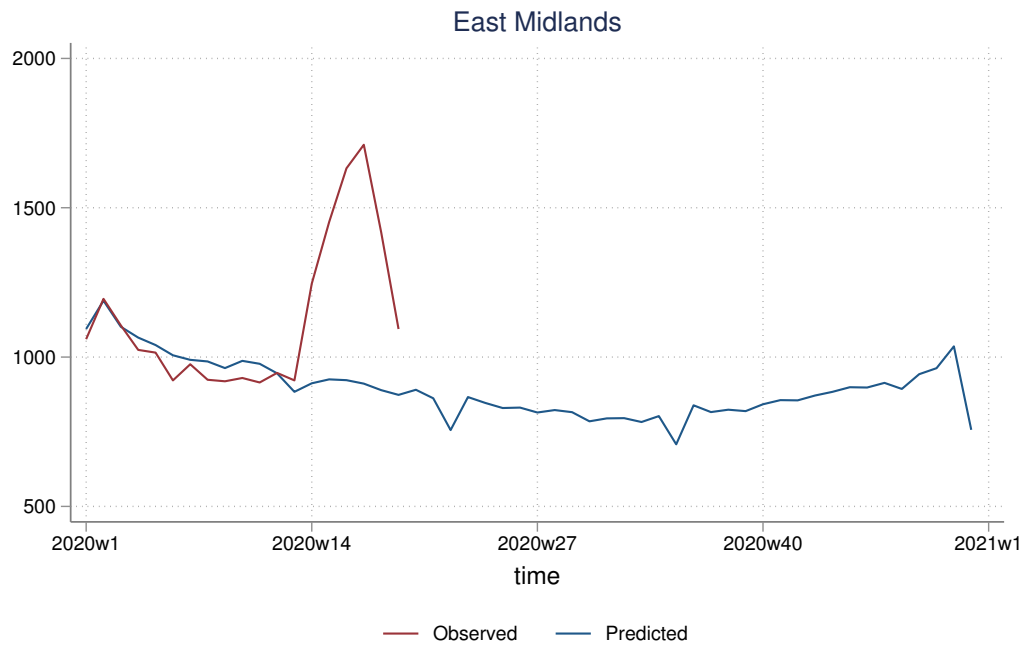

Figure 49: EMD all-cause excess deaths, from 2010 week 1

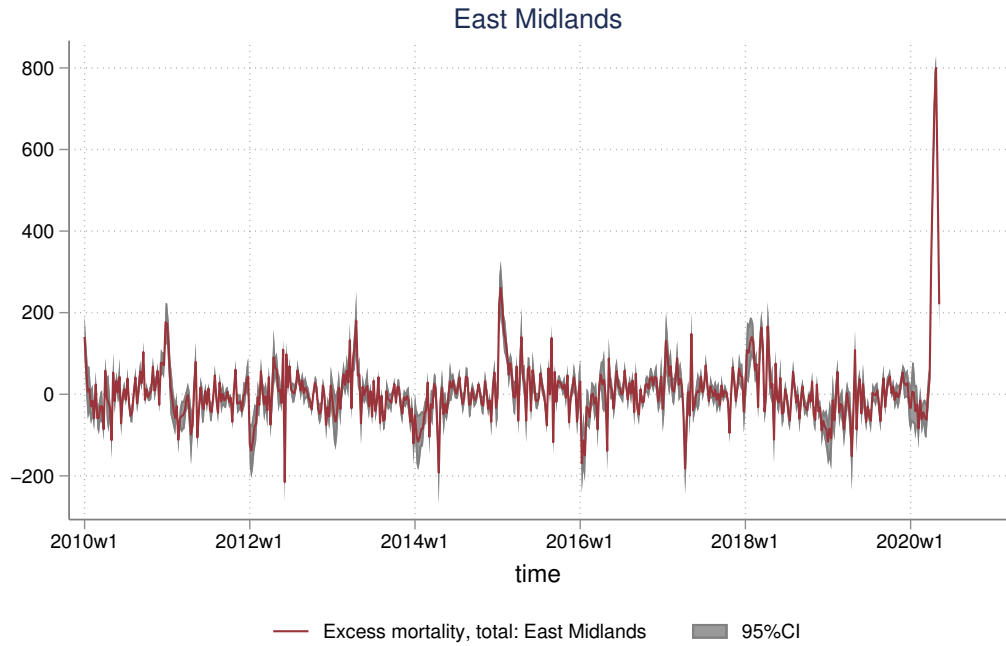

Figure 50: EMD all-cause excess deaths, from 2019 week 1

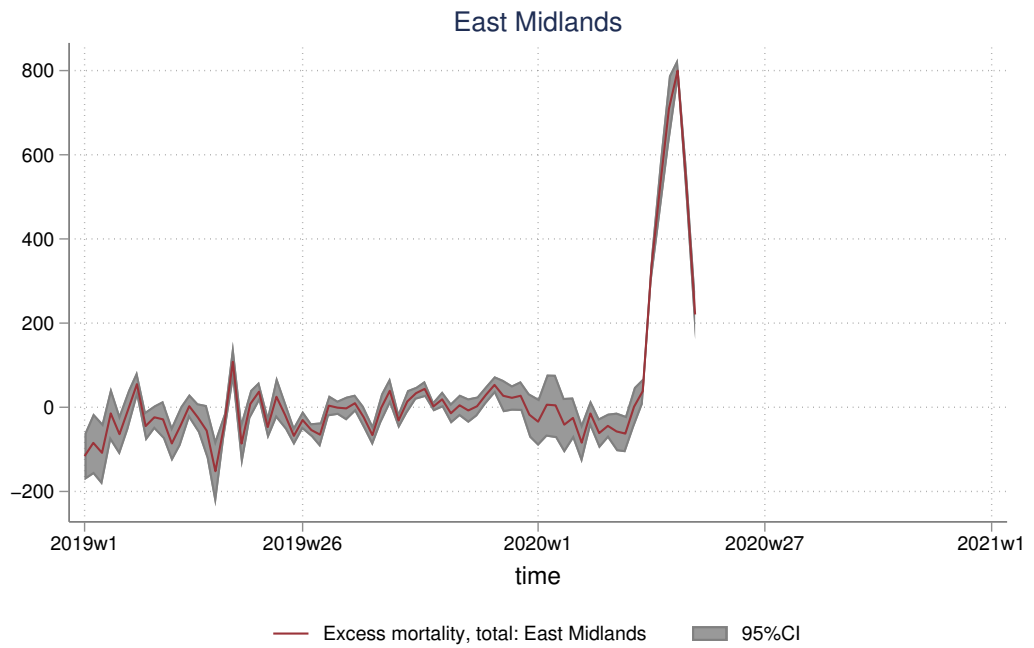

Figure 51: EMD all-cause excess deaths, from 2020 week 1

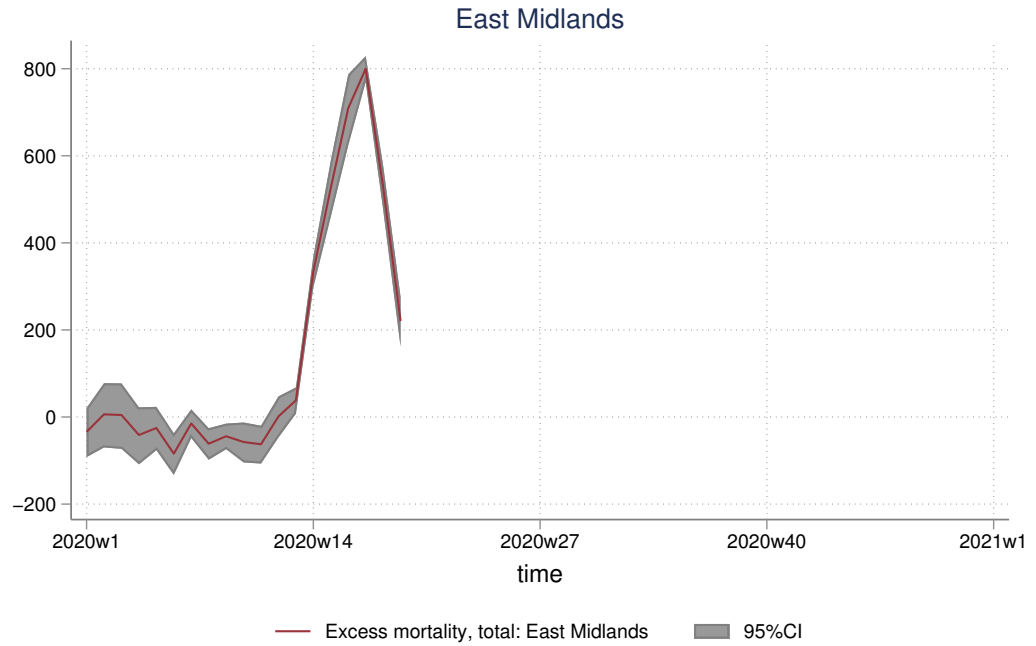

Figure 52: EMD all-cause excess deaths minus COVID19, from 2010 week 1

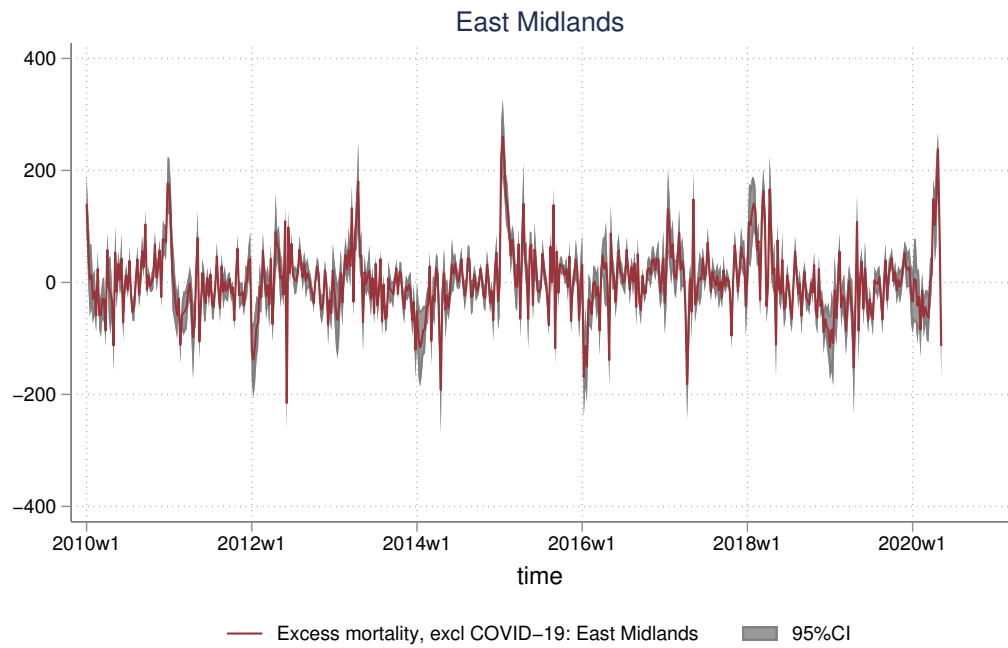

Figure 53: EMD all-cause excess deaths minus COVID19, from 2019 week 1

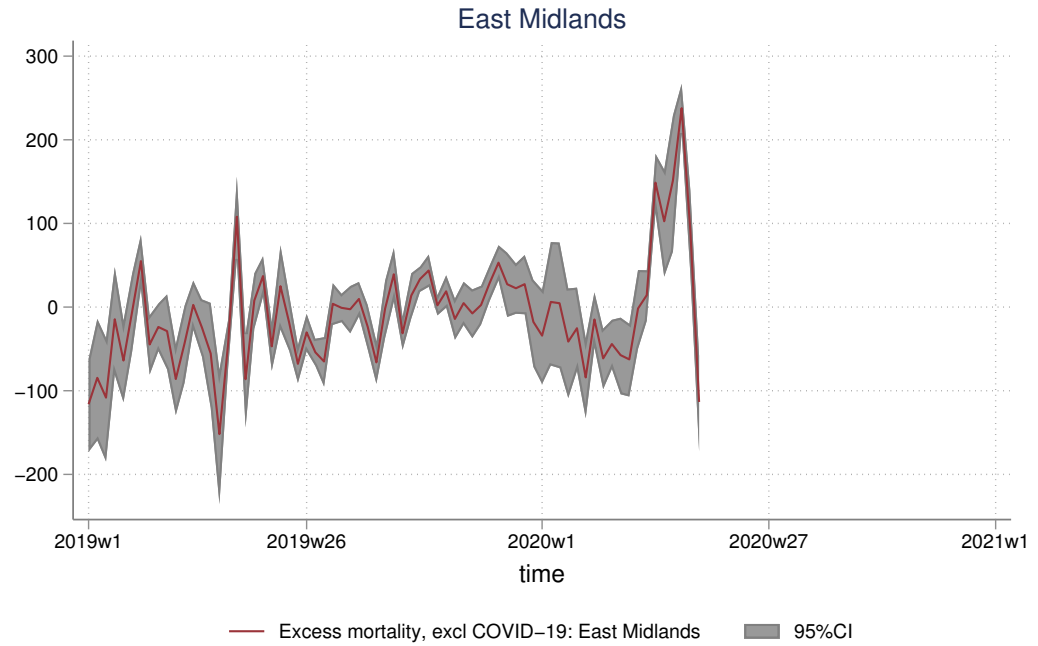

Figure 54: EMD all-cause excess deaths minus COVID19, from 2020 week 1

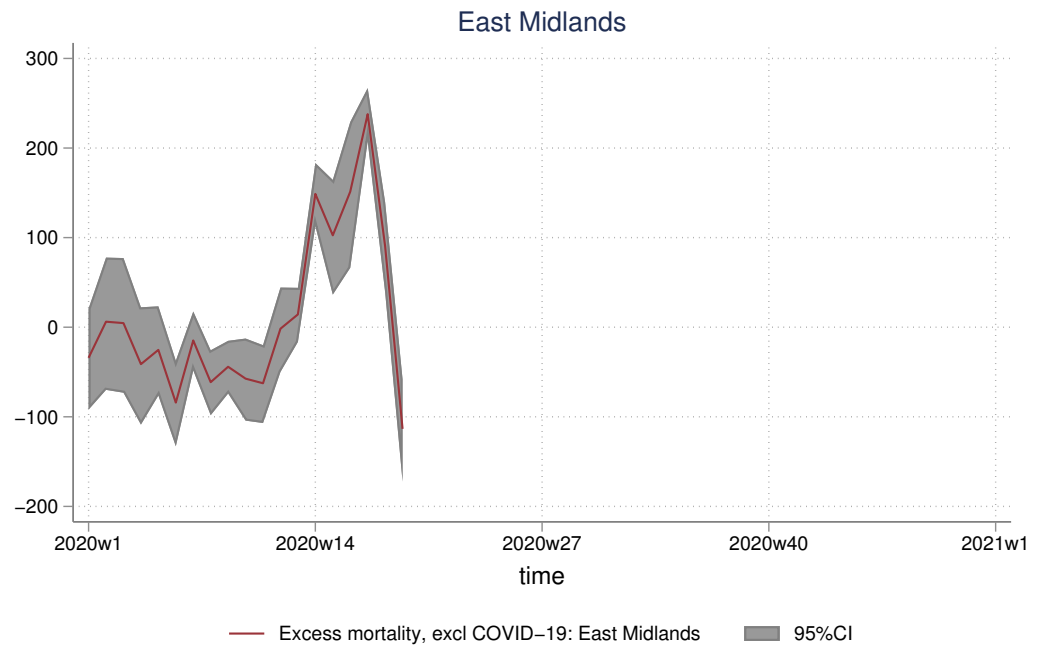

## 2.6 West Midlands

Figure 55: WMD Mortality time trend and model, from 2010 week 1

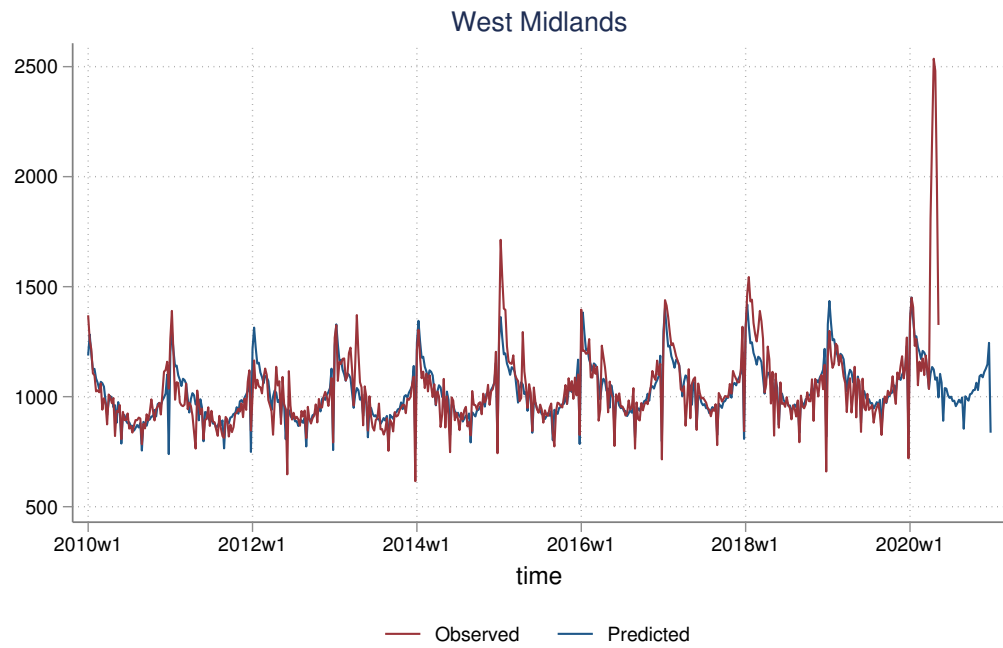



Figure 56: WMD Mortality time trend and model, from 2019 week 1

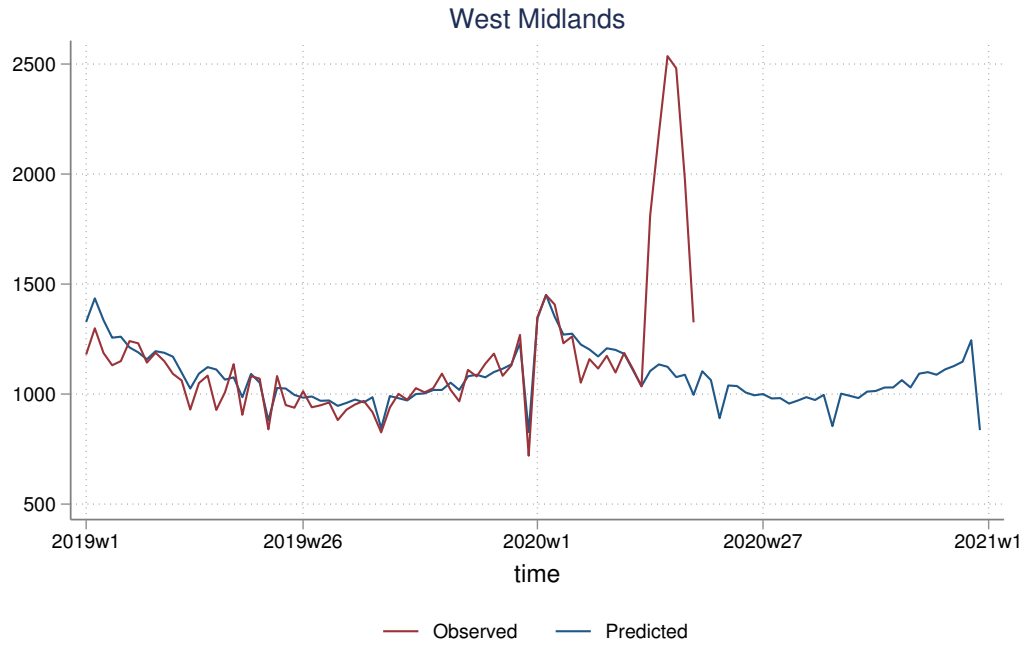

Figure 57: WMD Mortality time trend and model, from 2020 week 1

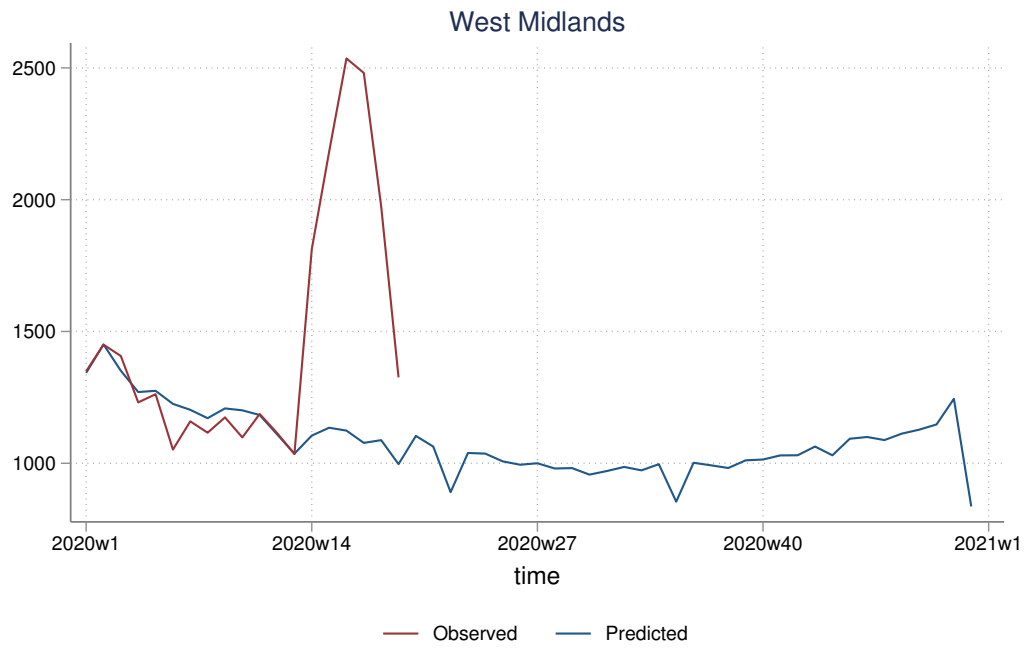

Figure 58: WMD all-cause excess deaths, from 2010 week 1

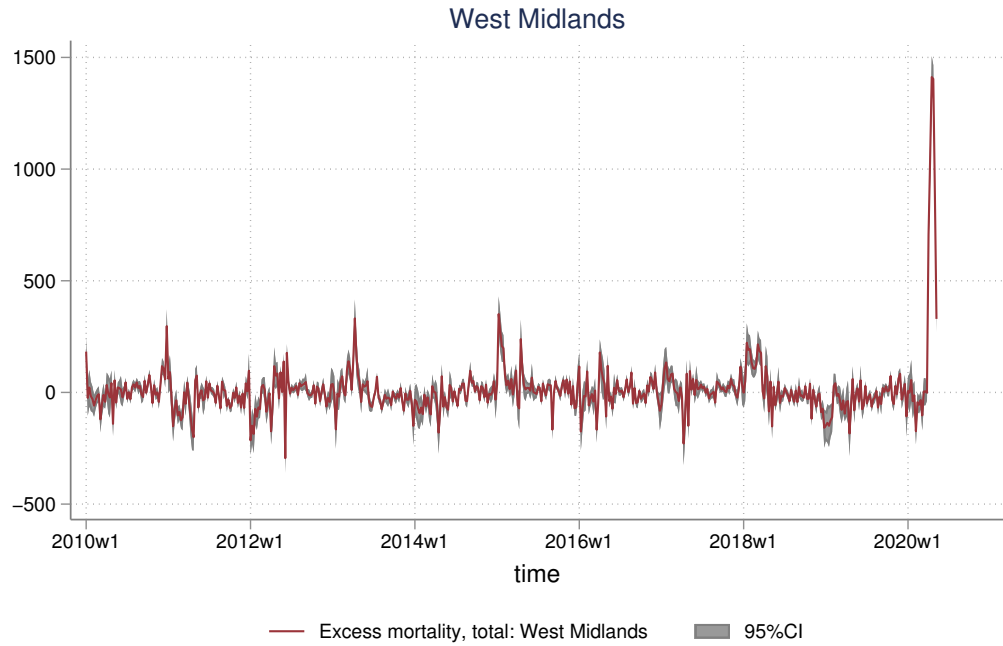

Figure 59: WMD all-cause excess deaths, from 2019 week 1

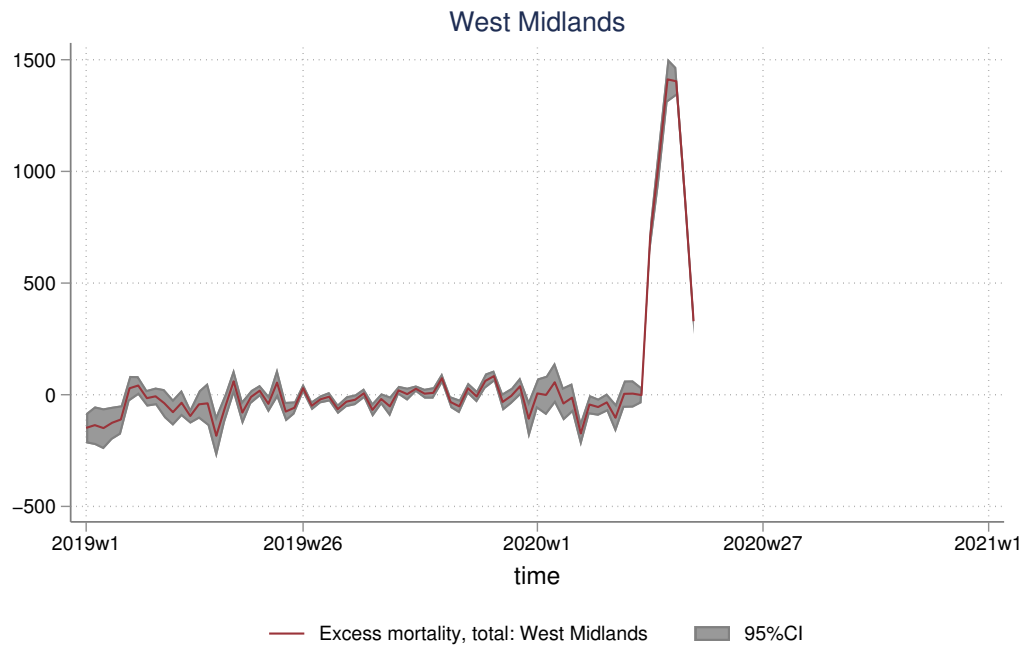

Figure 60: WMD all-cause excess deaths, from 2020 week 1

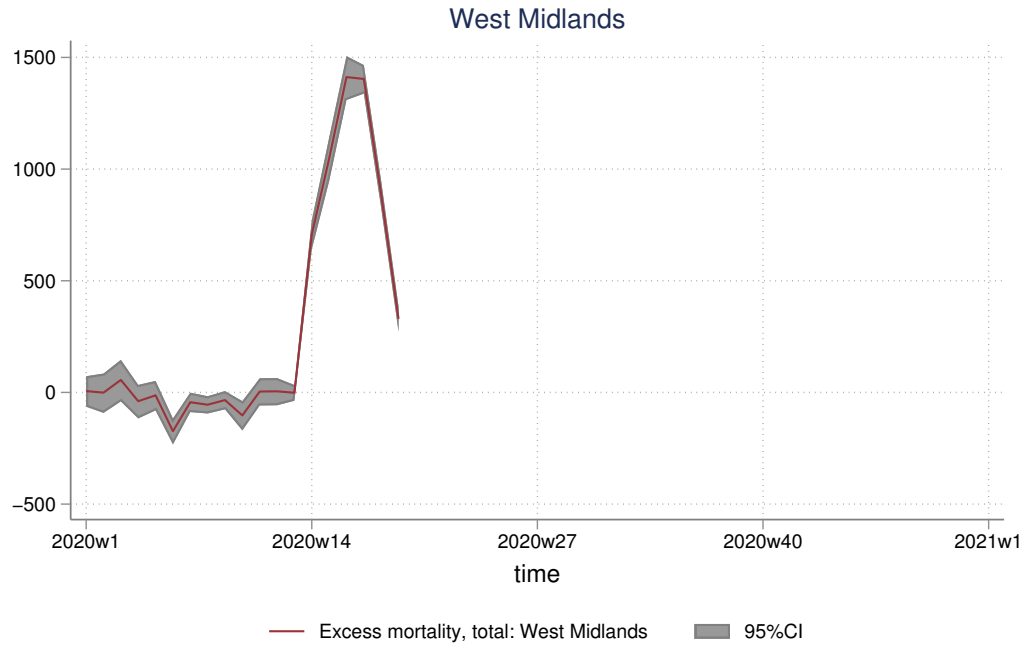

Figure 61: WMD all-cause excess deaths minus COVID19, from 2010 week 1

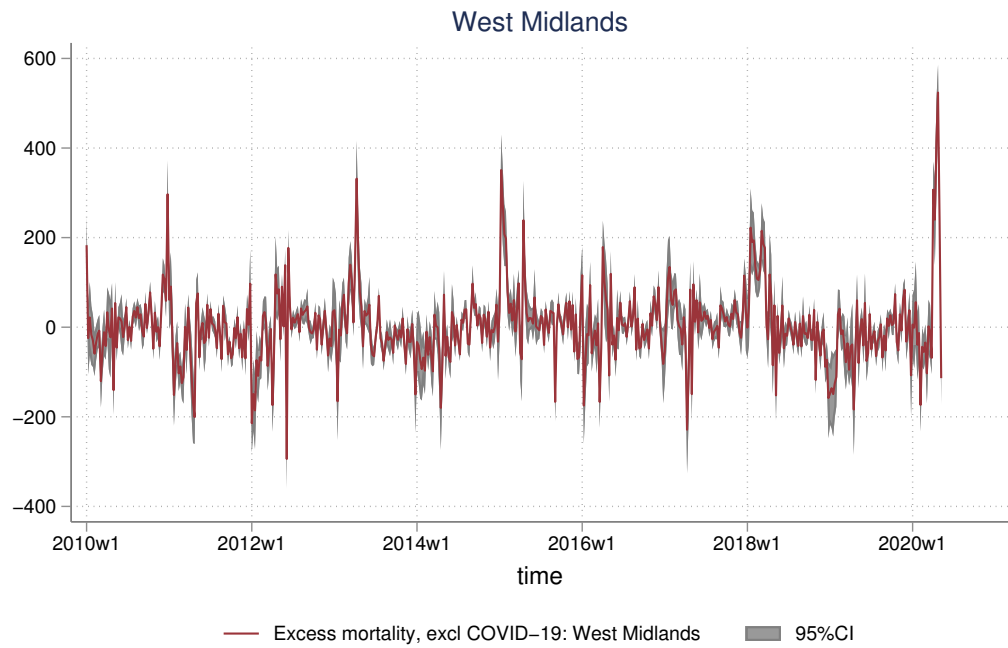

Figure 62: WMD all-cause excess deaths minus COVID19, from 2019 week 1

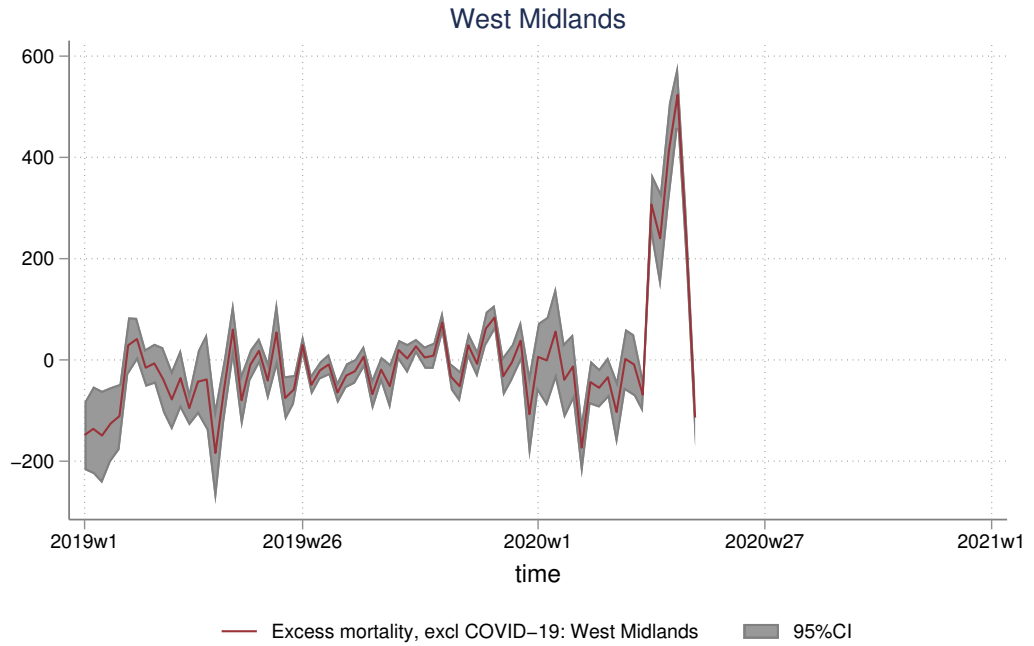

Figure 63: WMD all-cause excess deaths minus COVID19, from 2020 week 1

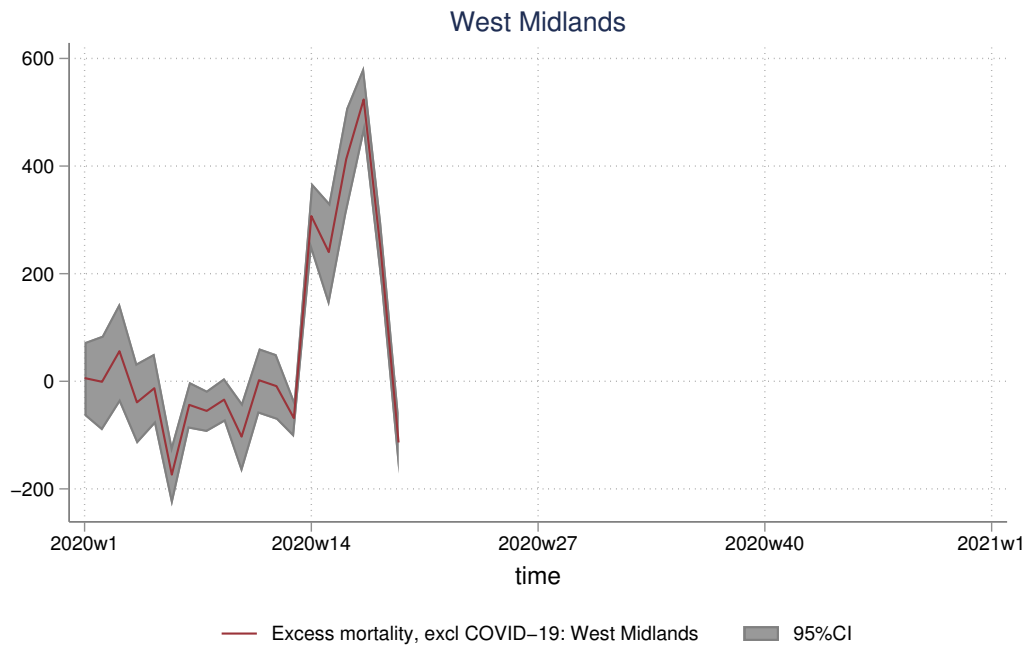

## 2.7 East

Figure 64: East Mortality time trend and model, from 2010 week 1

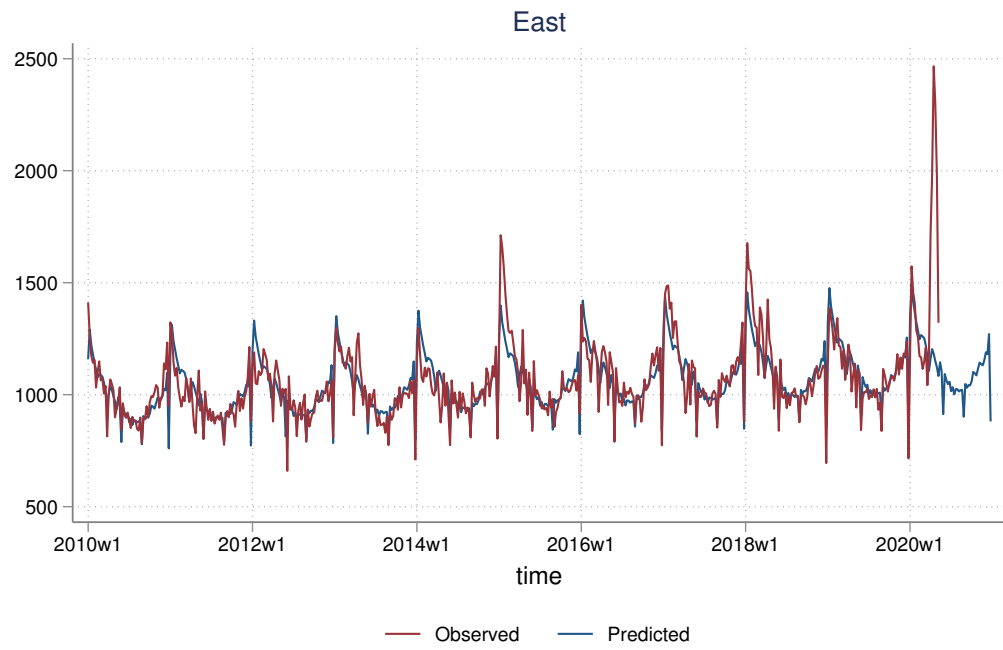

Figure 65: East Mortality time trend and model, from 2019 week 1

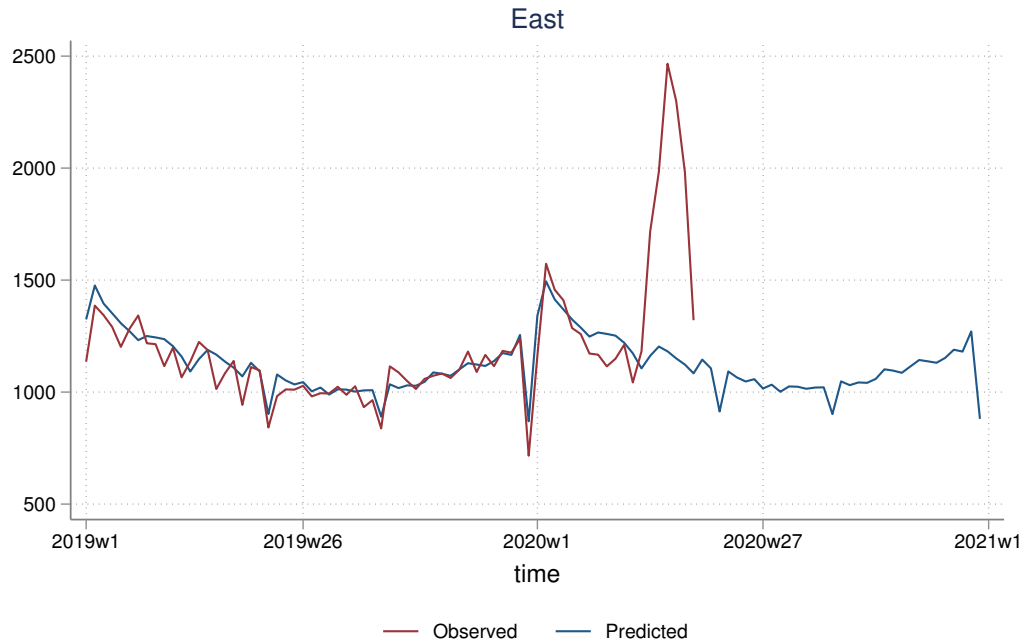

Figure 66: East Mortality time trend and model, from 2020 week 1

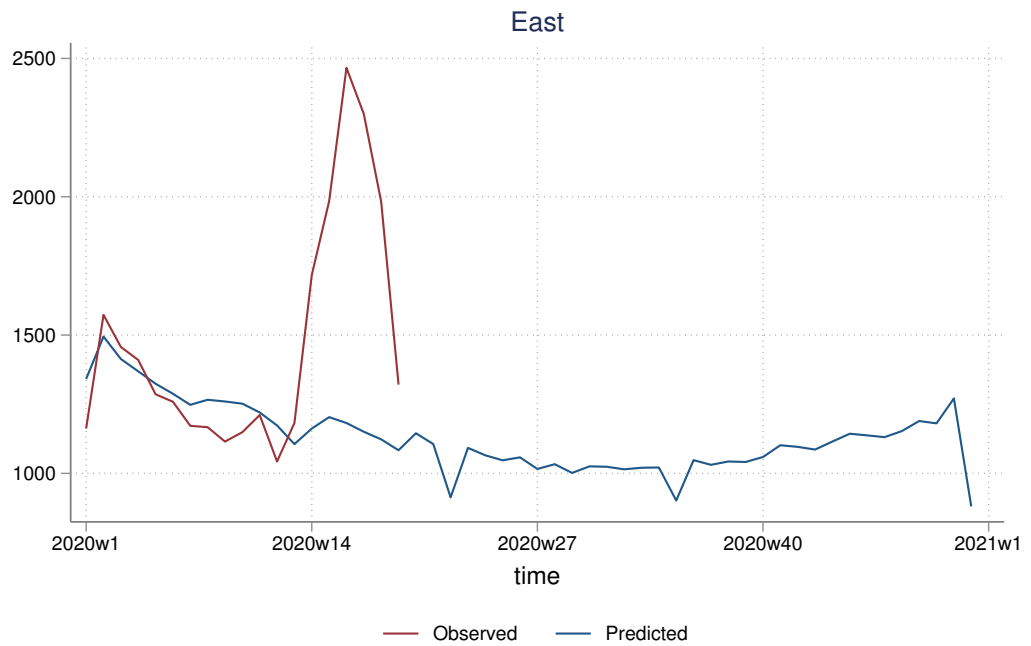

Figure 67: East all-cause excess deaths, from 2010 week 1

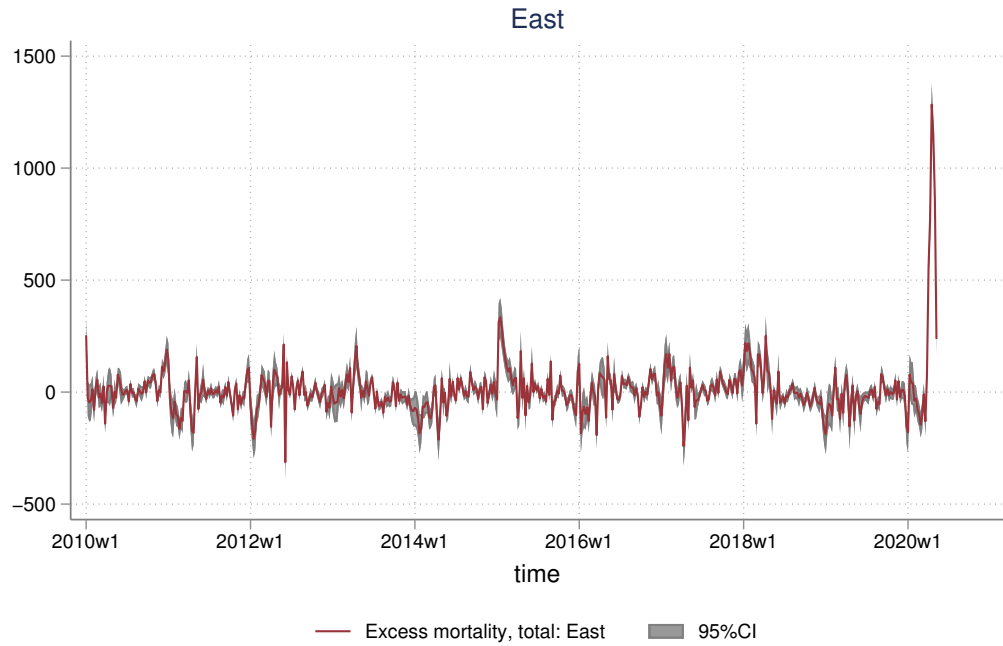

Figure 68: East all-cause excess deaths, from 2019 week 1

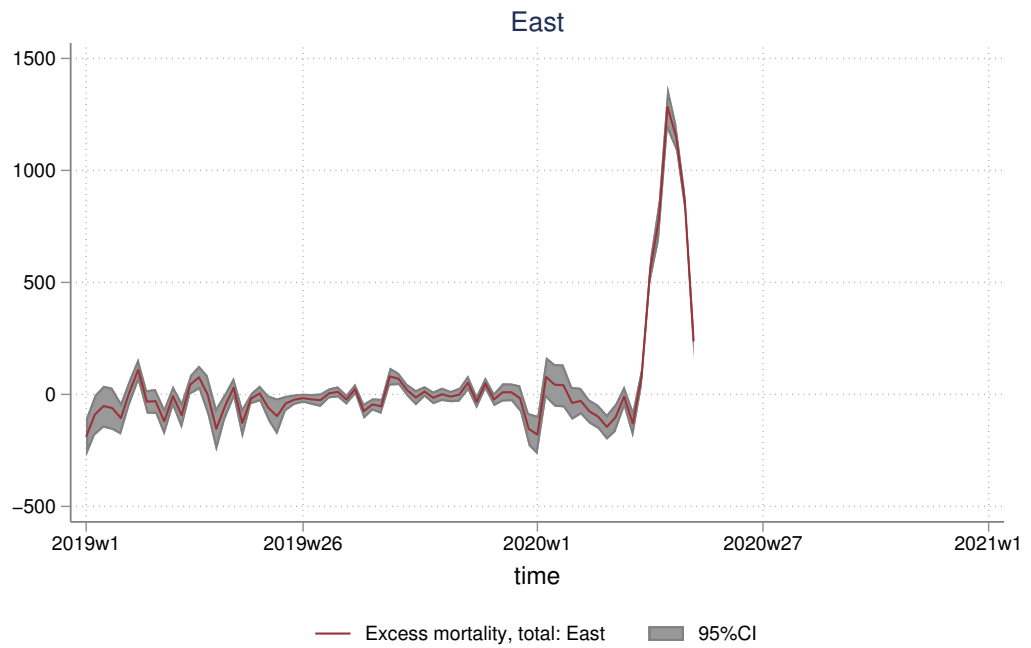

Figure 69: East all-cause excess deaths, from 2020 week 1

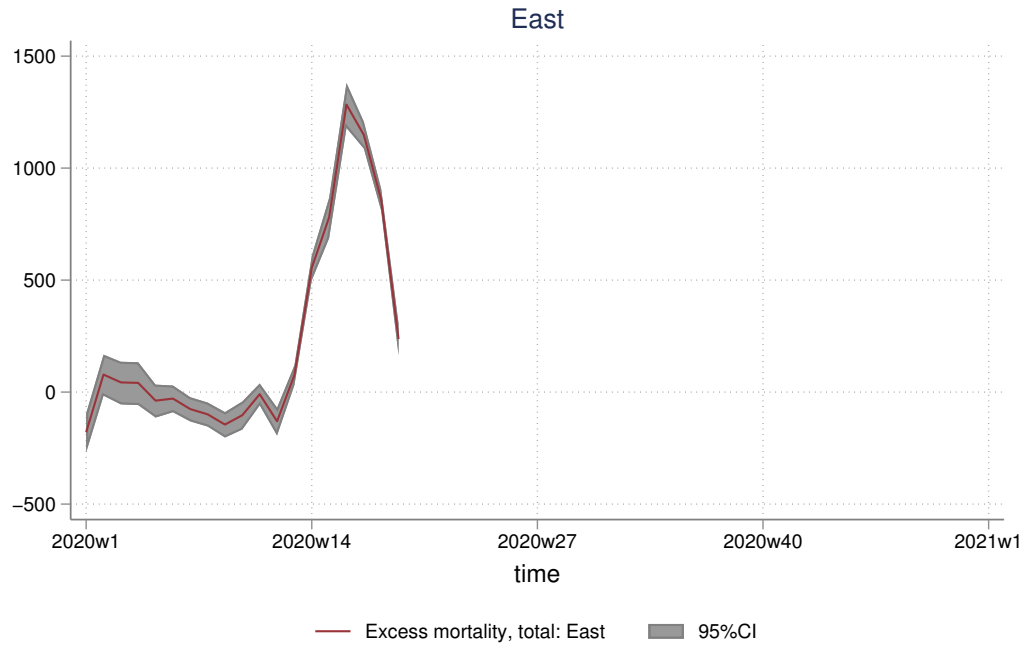

Figure 70: East all-cause excess deaths minus COVID19, from 2010 week 1

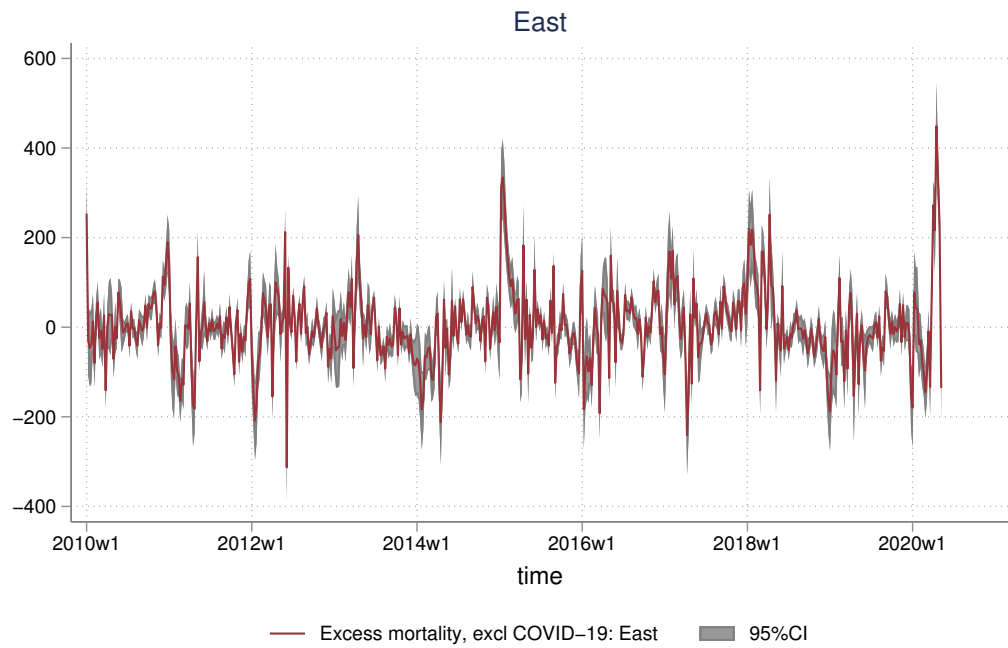



Figure 71: East all-cause excess deaths minus COVID19, from 2019 week 1

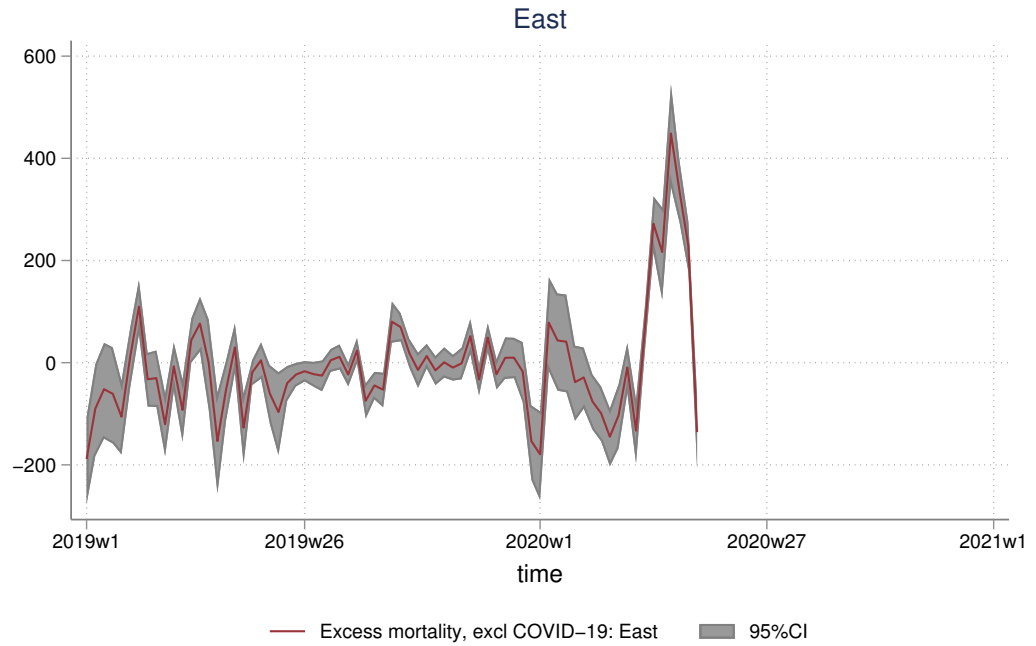

Figure 72: East all-cause excess deaths minus COVID19, from 2020 week 1

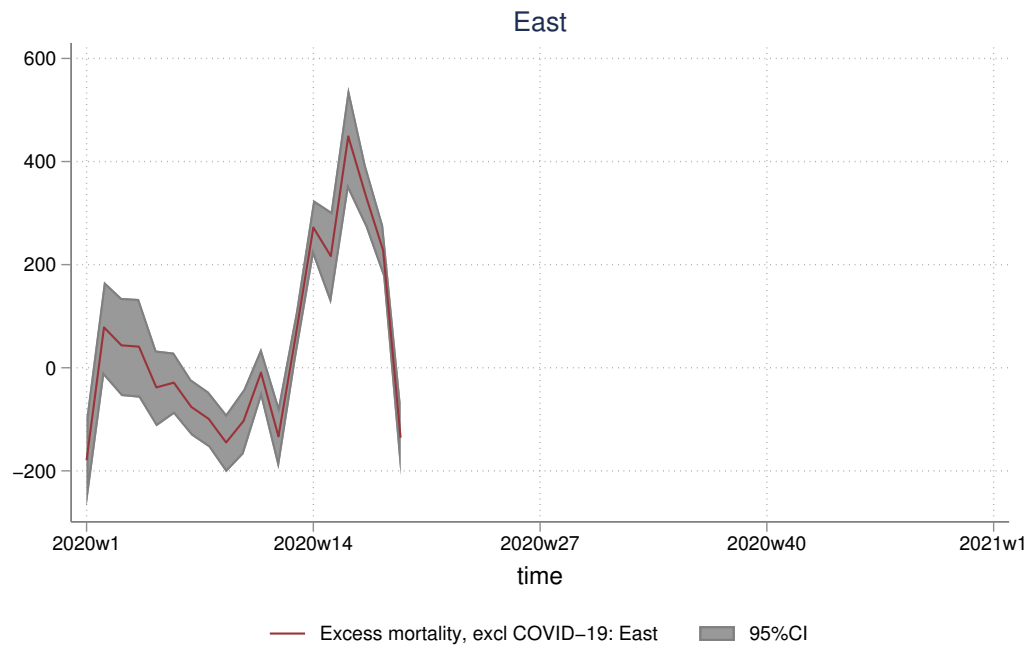

## 2.8 London

Figure 73: London Mortality time trend and model, from 2010 week 1

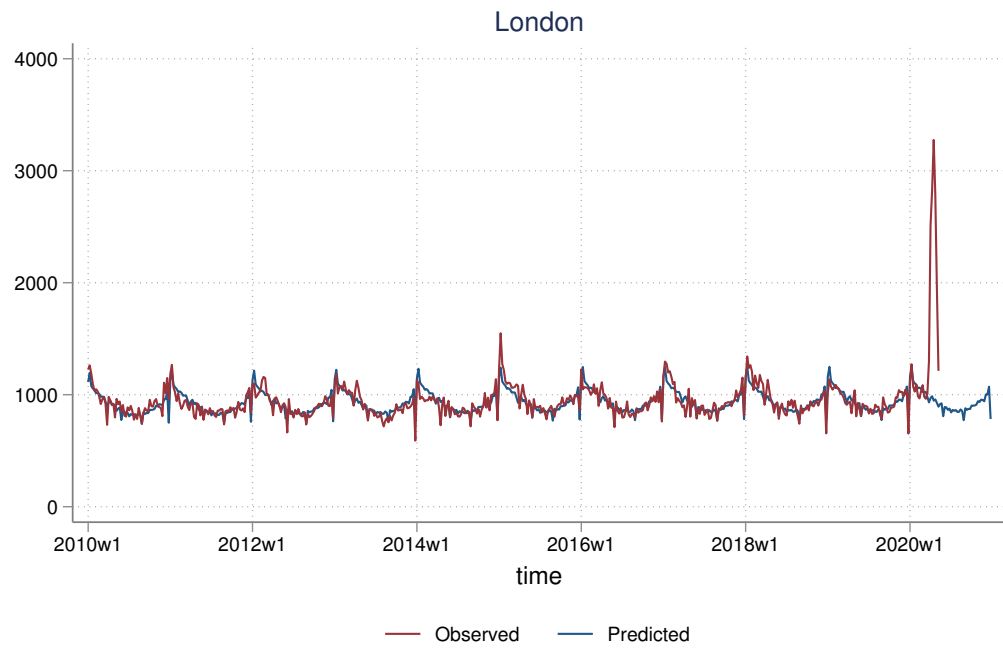

Figure 74: London Mortality time trend and model, from 2019 week 1

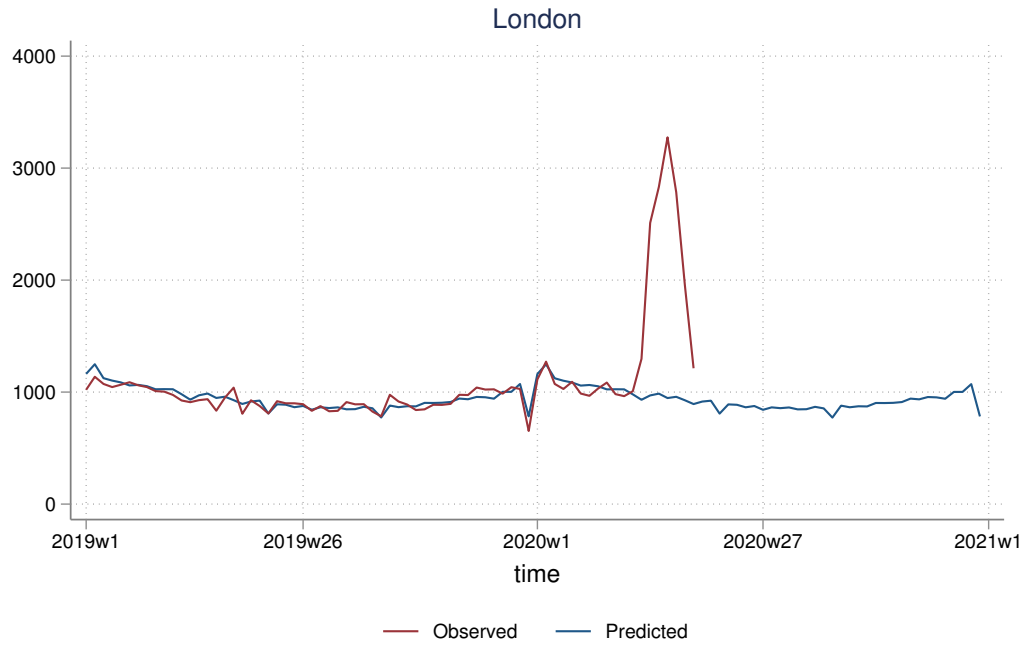

Figure 75: London Mortality time trend and model, from 2020 week 1

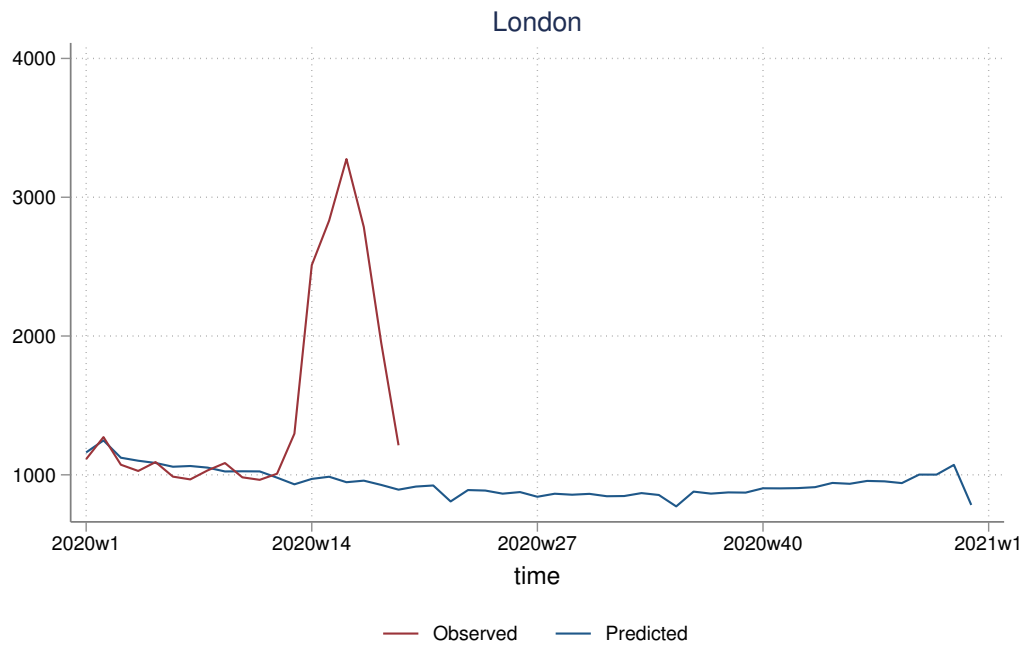

Figure 76: London all-cause excess deaths, from 2010 week 1

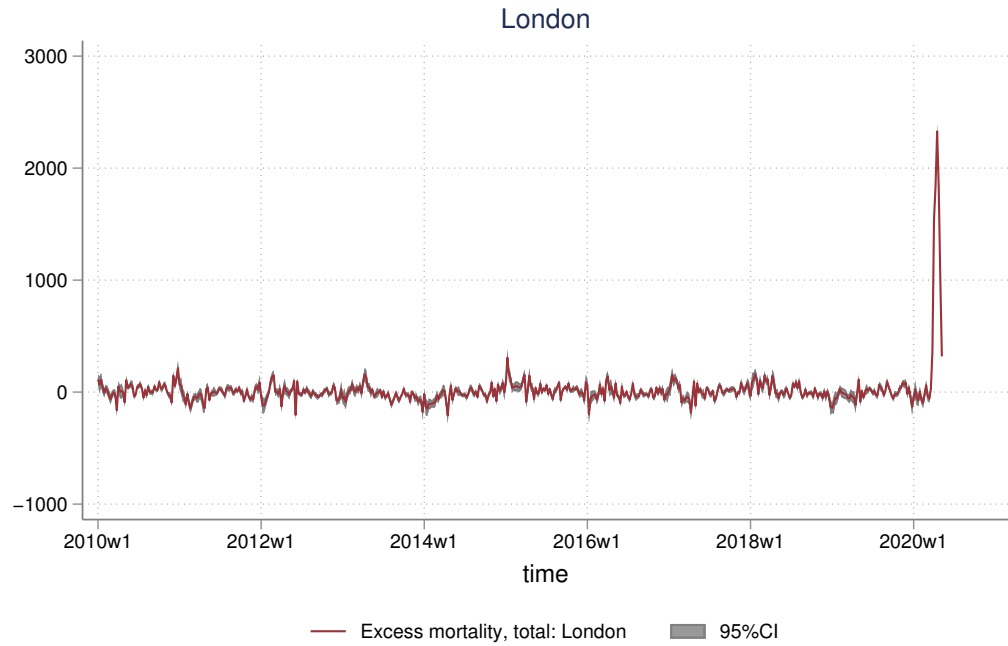

Figure 77: London all-cause excess deaths, from 2019 week 1

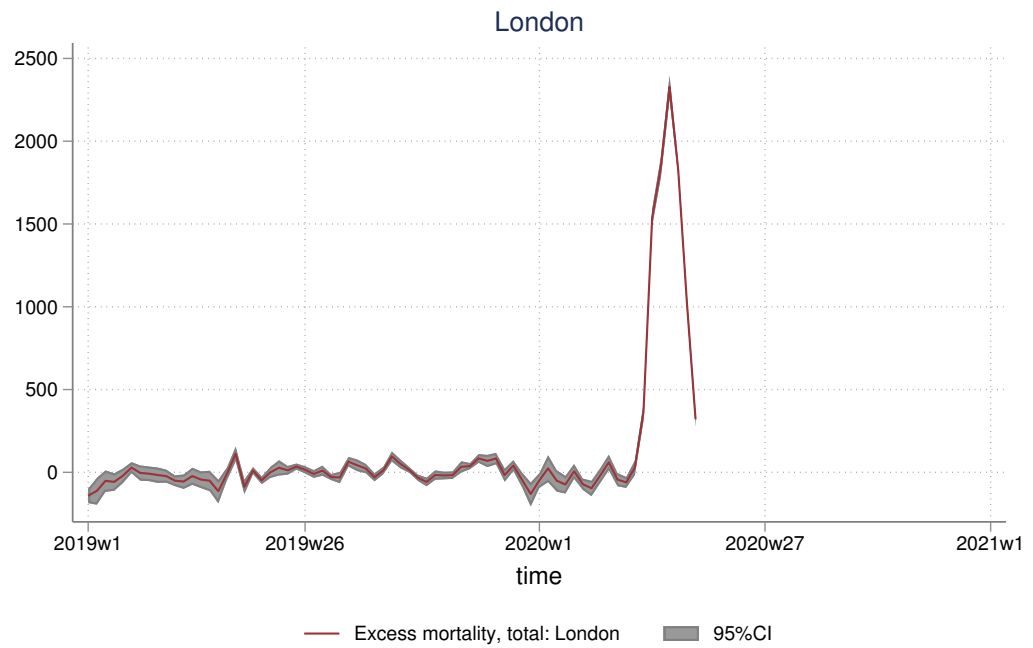

Figure 78: London all-cause excess deaths, from 2020 week 1

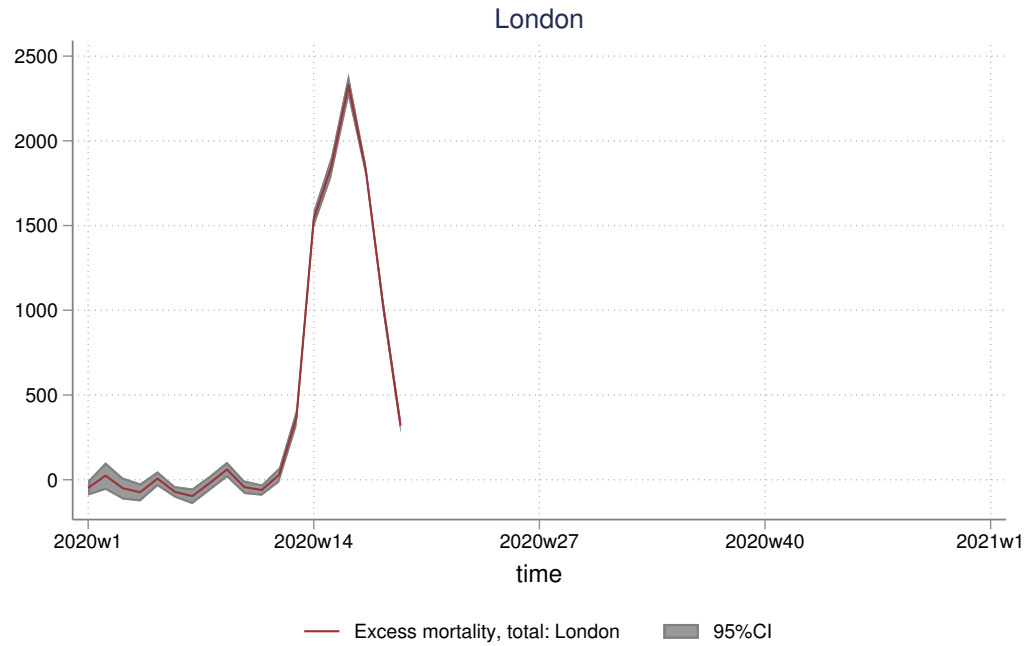

Figure 79: London all-cause excess deaths minus COVID19, from 2010 week 1

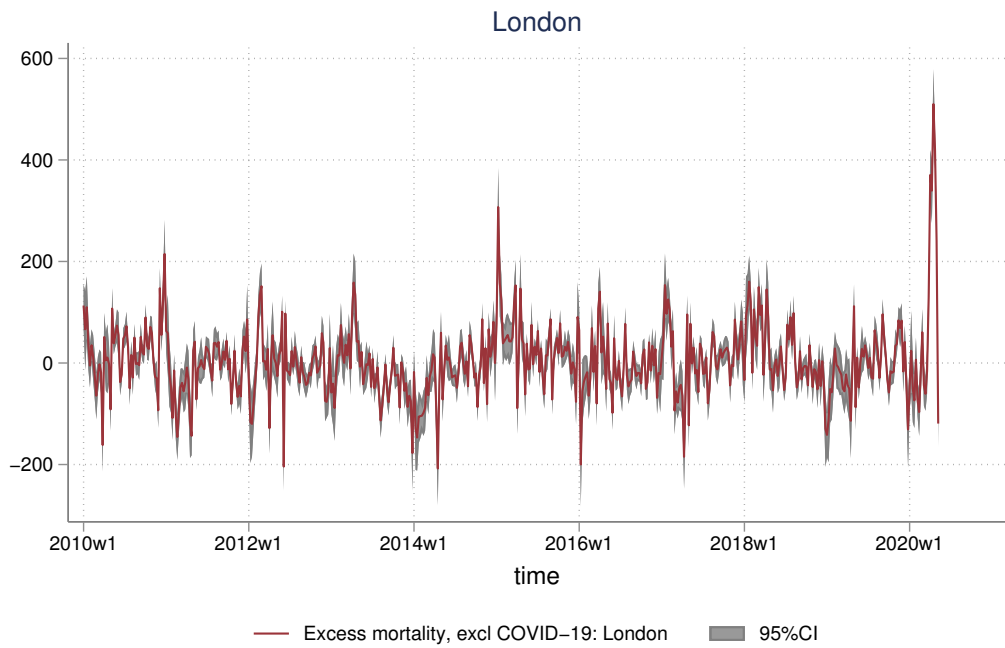

Figure 80: London all-cause excess deaths minus COVID19, from 2019 week 1

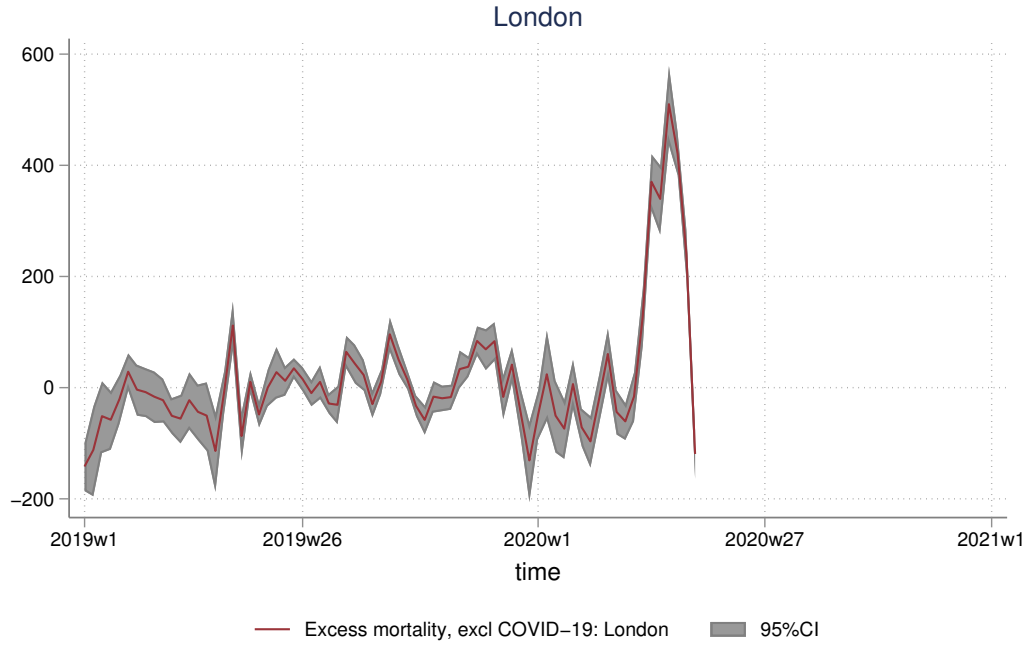

Figure 81: London all-cause excess deaths minus COVID19, from 2020 week 1

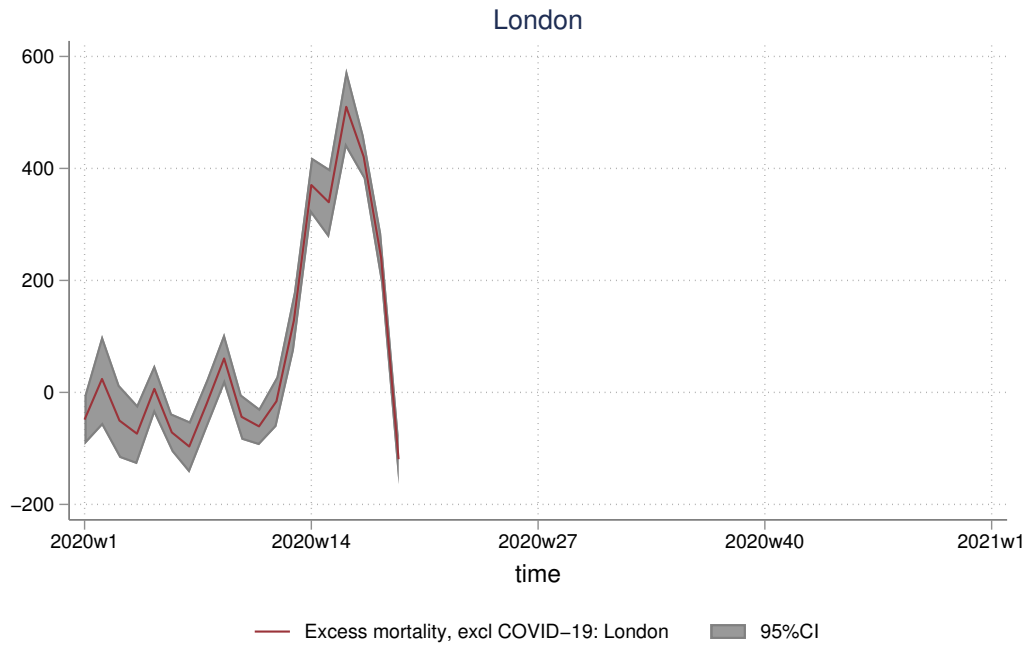

## 2.9 South East

Figure 82: SE Mortality time trend and model, from 2010 week 1

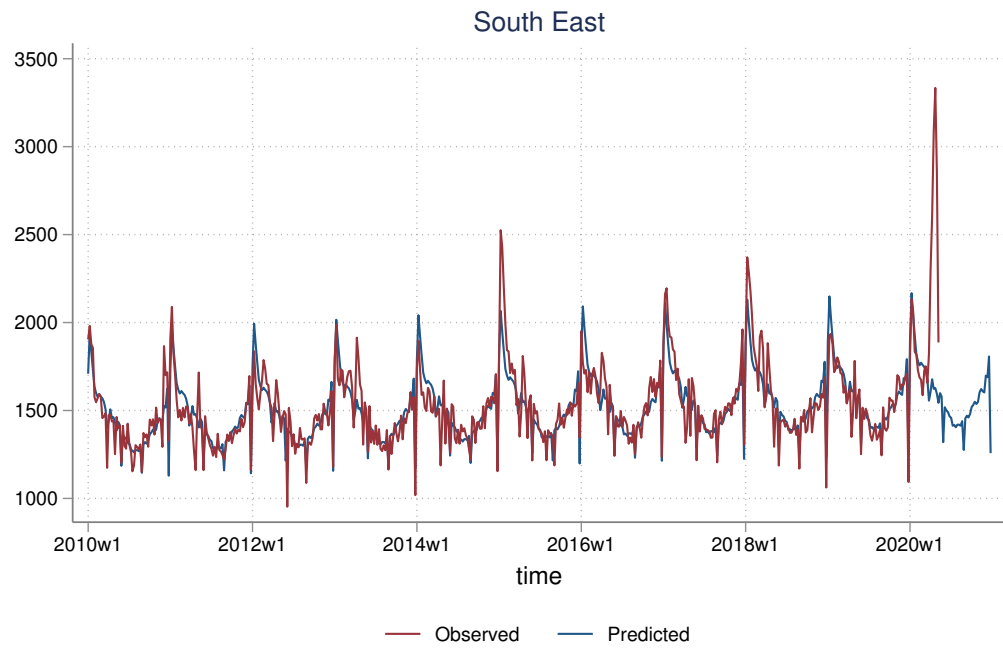

Figure 83: SE Mortality time trend and model, from 2019 week 1

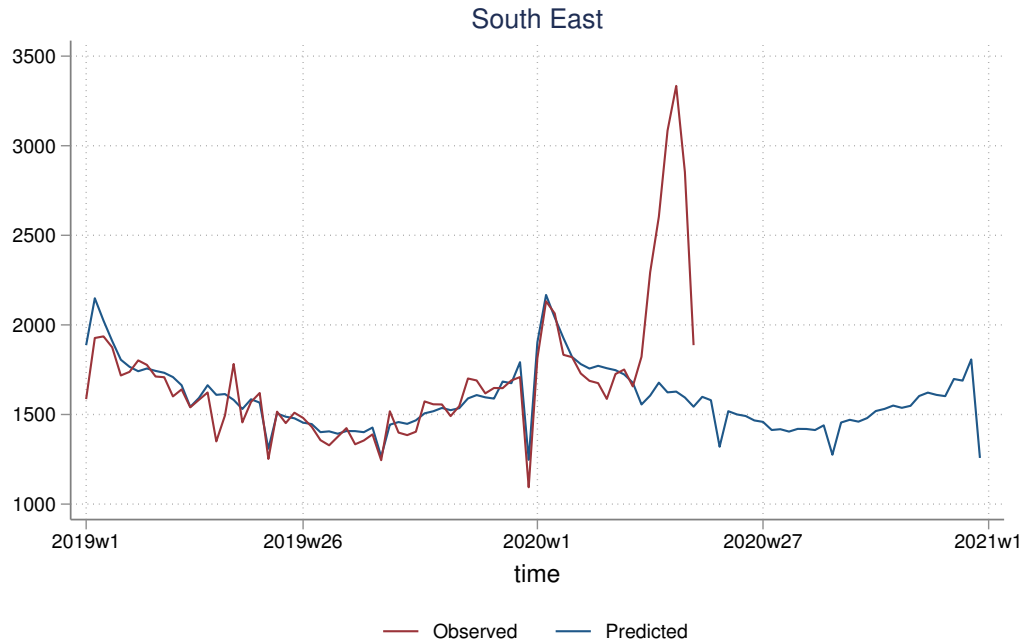

Figure 84: SE Mortality time trend and model, from 2020 week 1

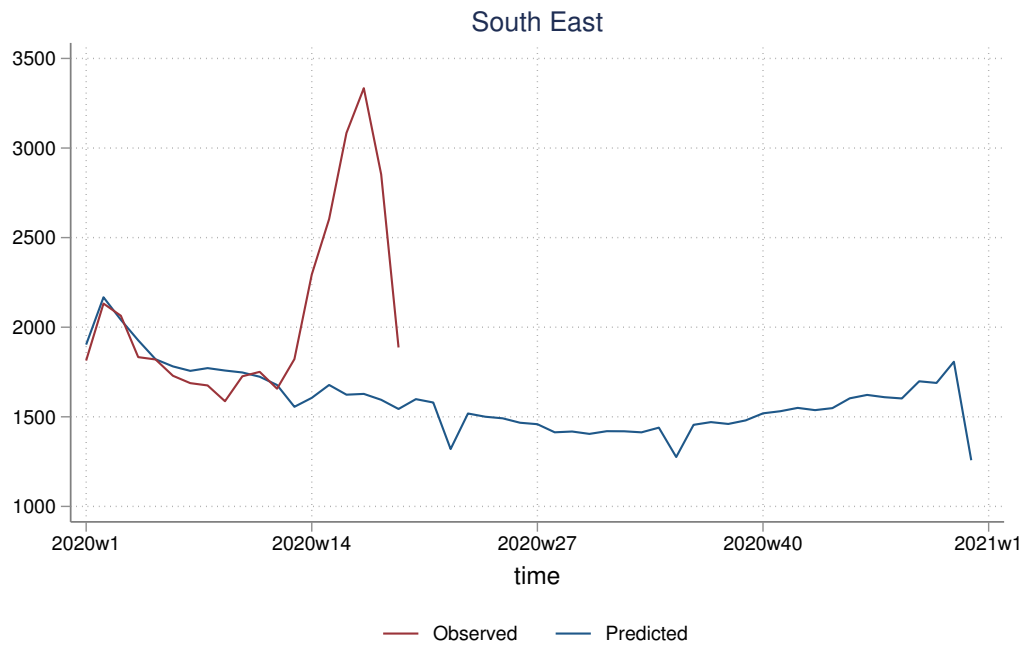



Figure 85: SE all-cause excess deaths, from 2010 week 1

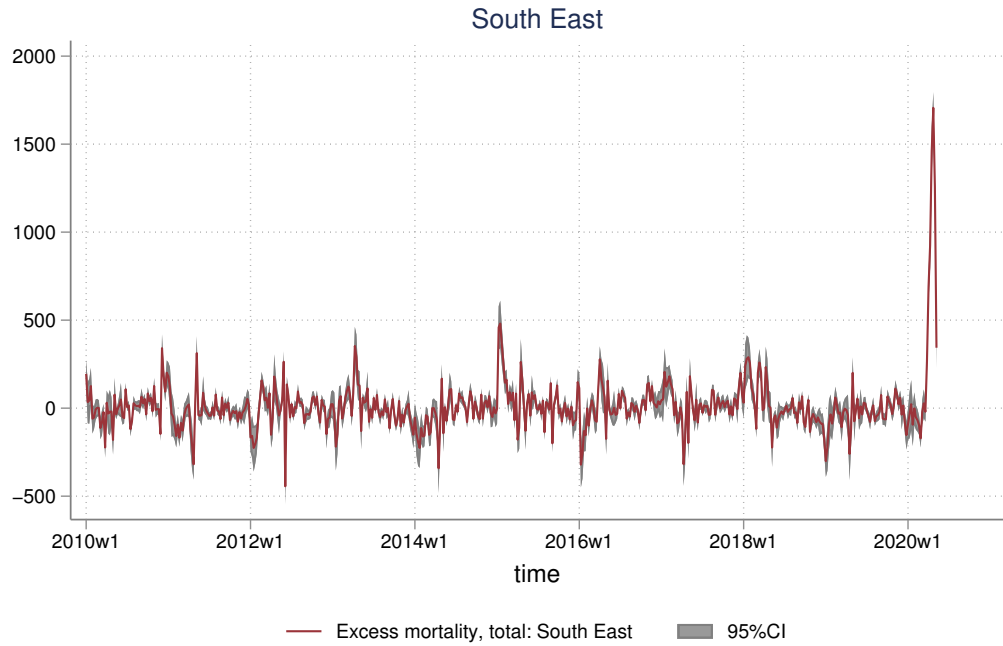

Figure 86: SE all-cause excess deaths, from 2019 week 1

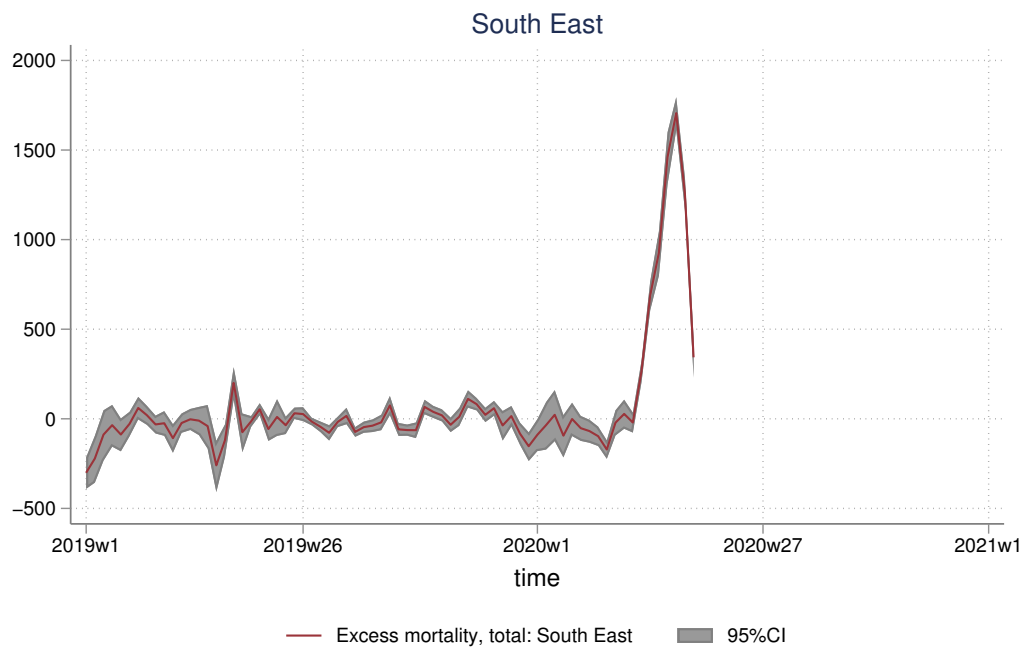

Figure 87: SE all-cause excess deaths, from 2020 week 1

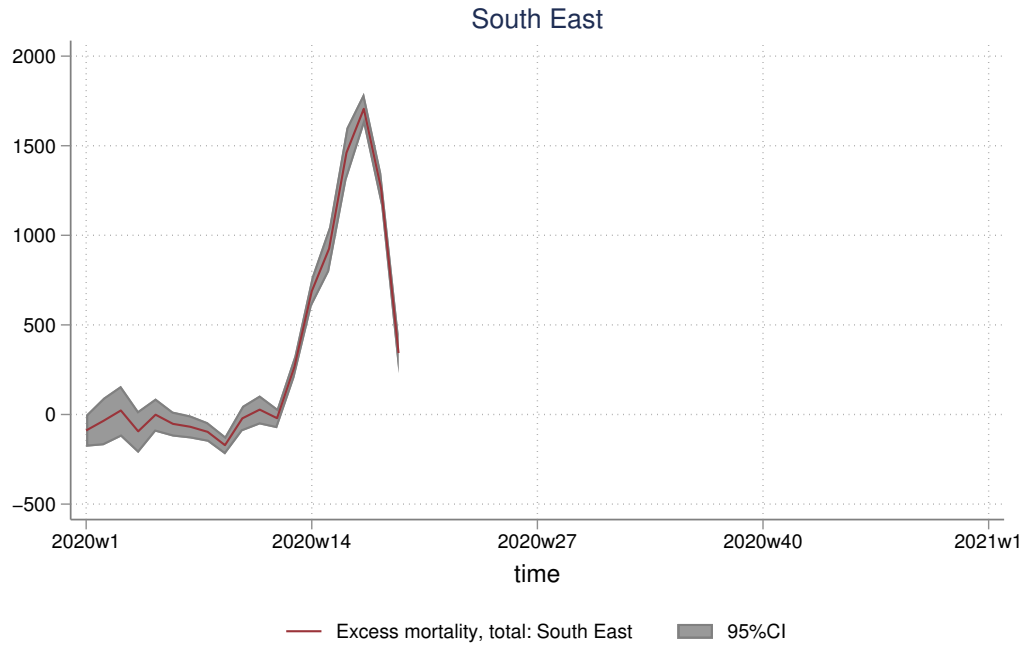

Figure 88: SE all-cause excess deaths minus COVID19, from 2010 week 1

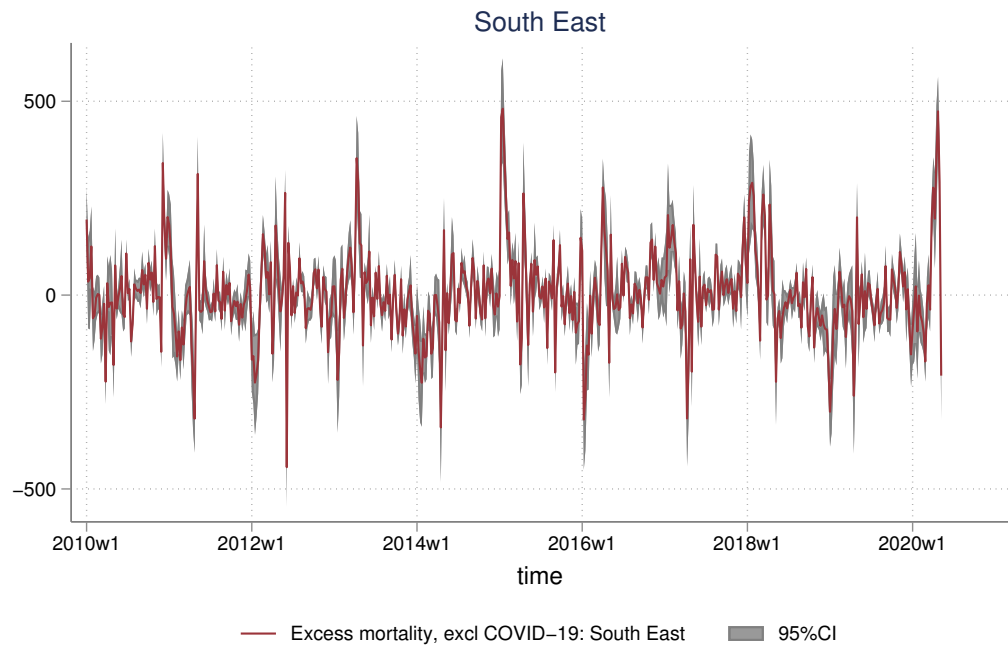

Figure 89: SE all-cause excess deaths minus COVID19, from 2019 week 1

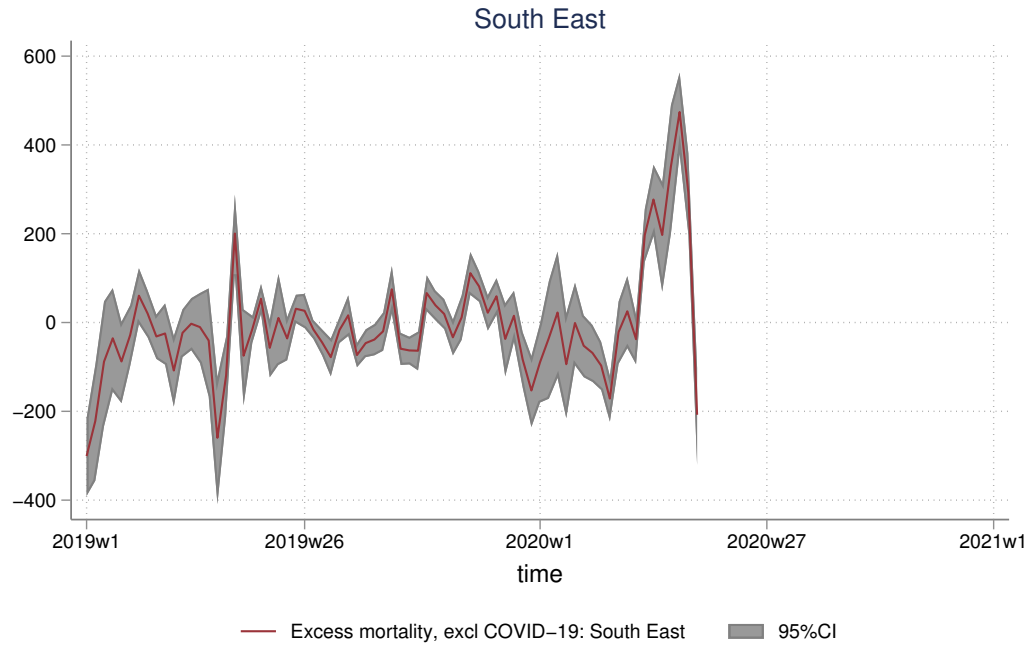

Figure 90: SE all-cause excess deaths minus COVID19, from 2020 week 1

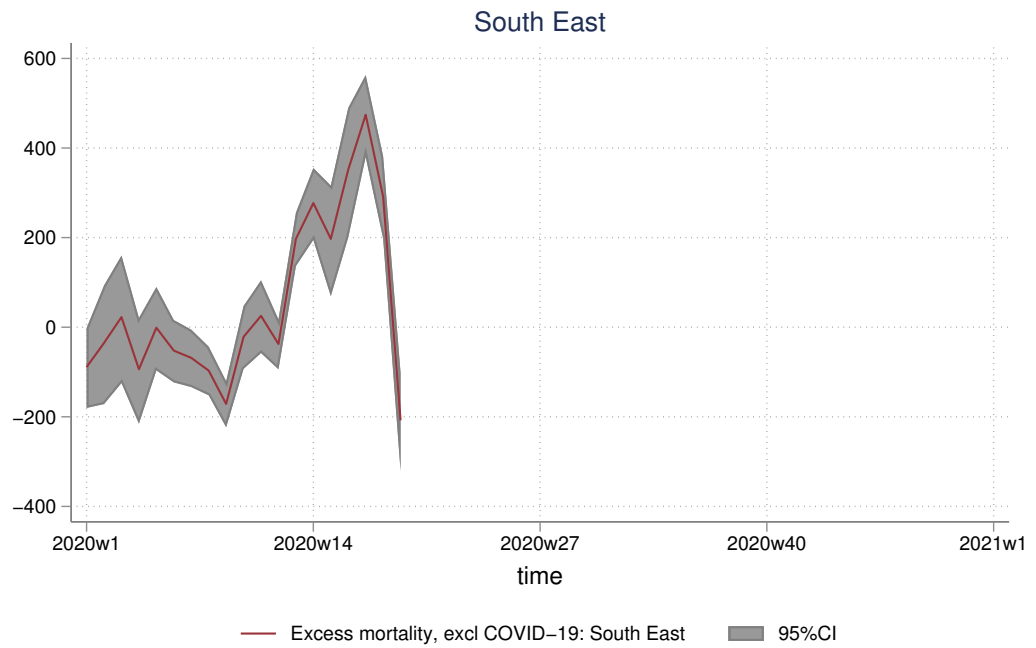

## 2.10 South West

Figure 91: SW Mortality time trend and model, from 2010 week 1

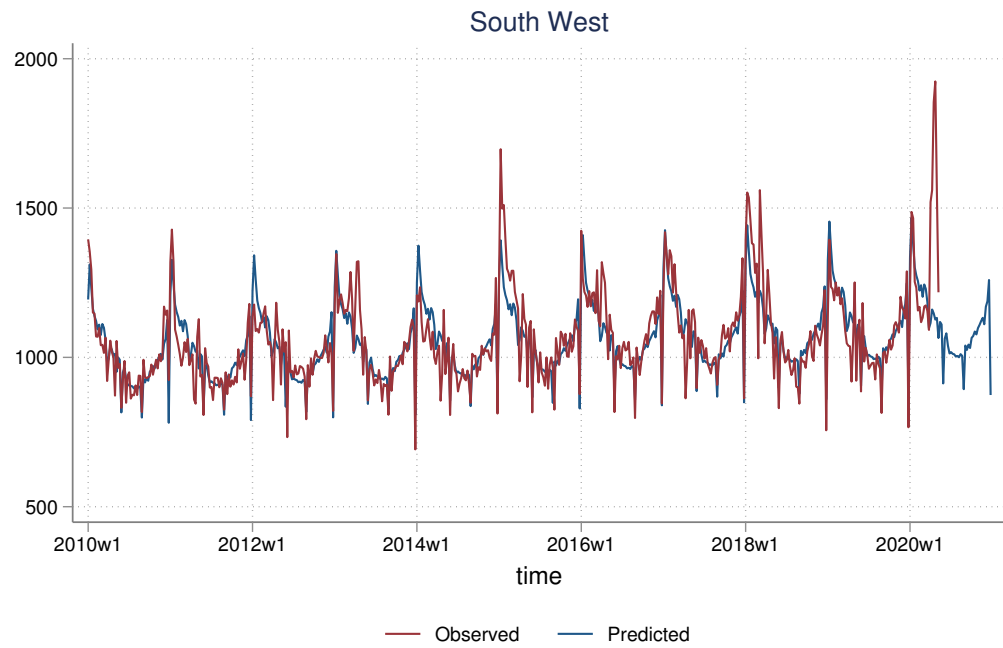

Figure 92: SE Mortality time trend and model, from 2019 week 1

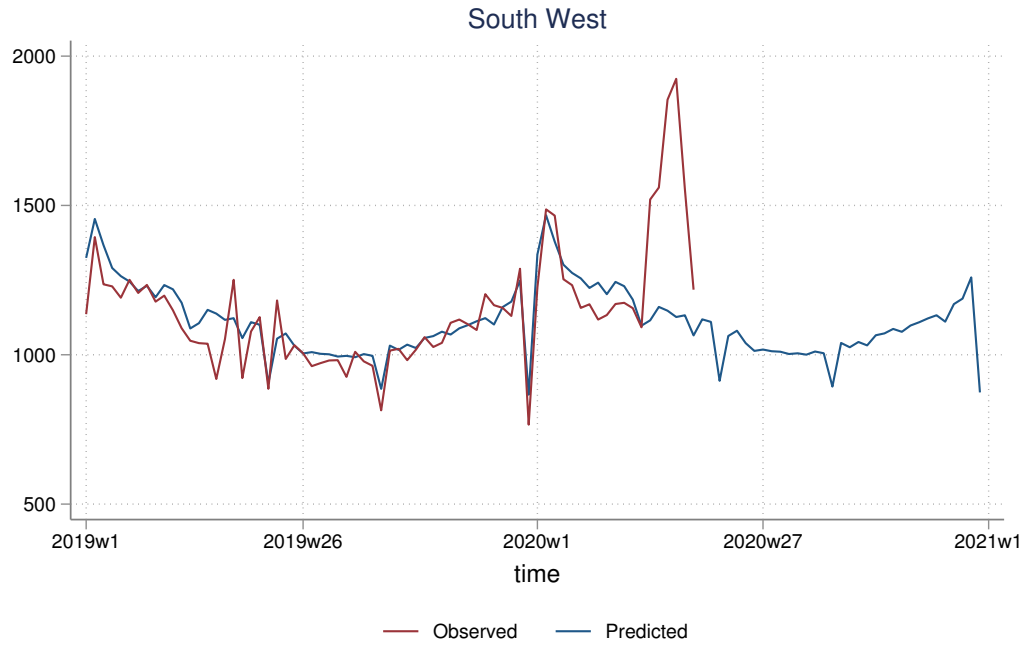

Figure 93: SW Mortality time trend and model, from 2020 week 1

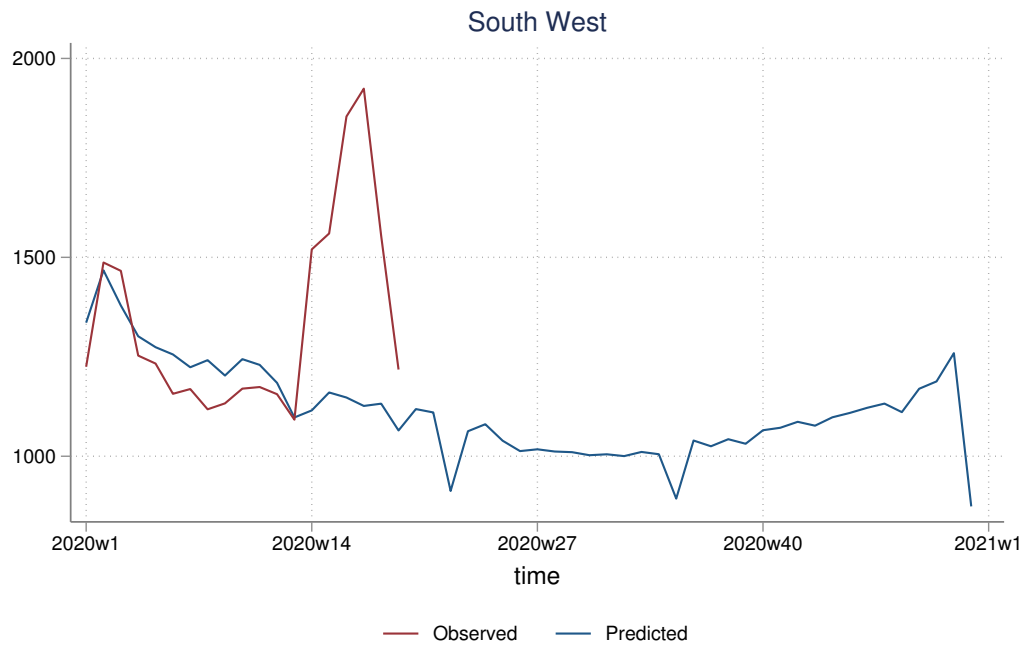

Figure 94: SW all-cause excess deaths, from 2010 week 1

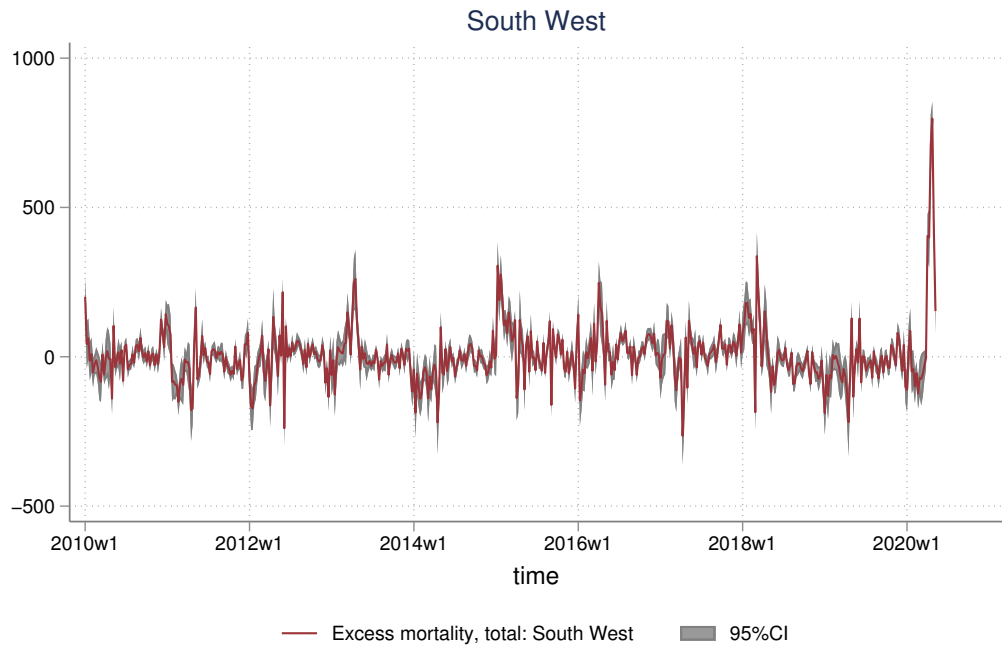

Figure 95: SW all-cause excess deaths, from 2019 week 1

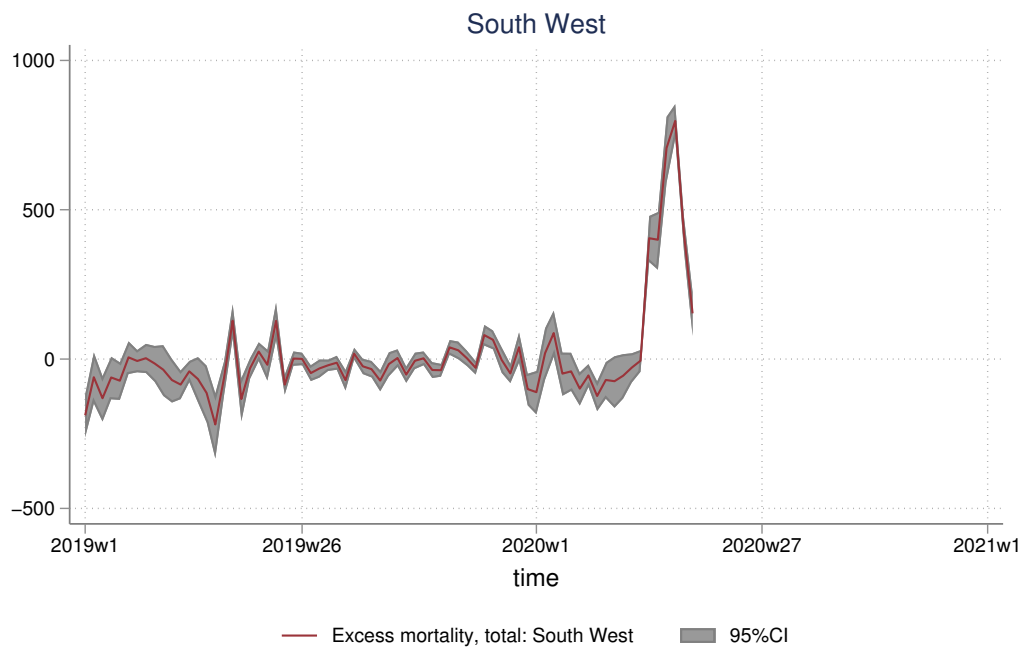

Figure 96: SW all-cause excess deaths, from 2020 week 1

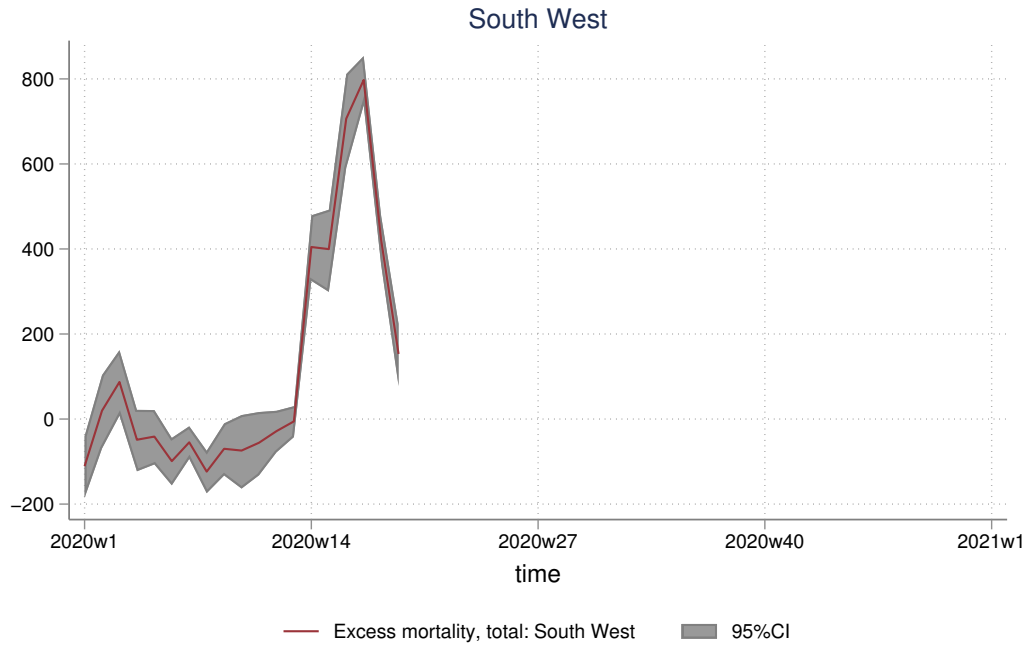

Figure 97: SW all-cause excess deaths minus COVID19, from 2010 week 1

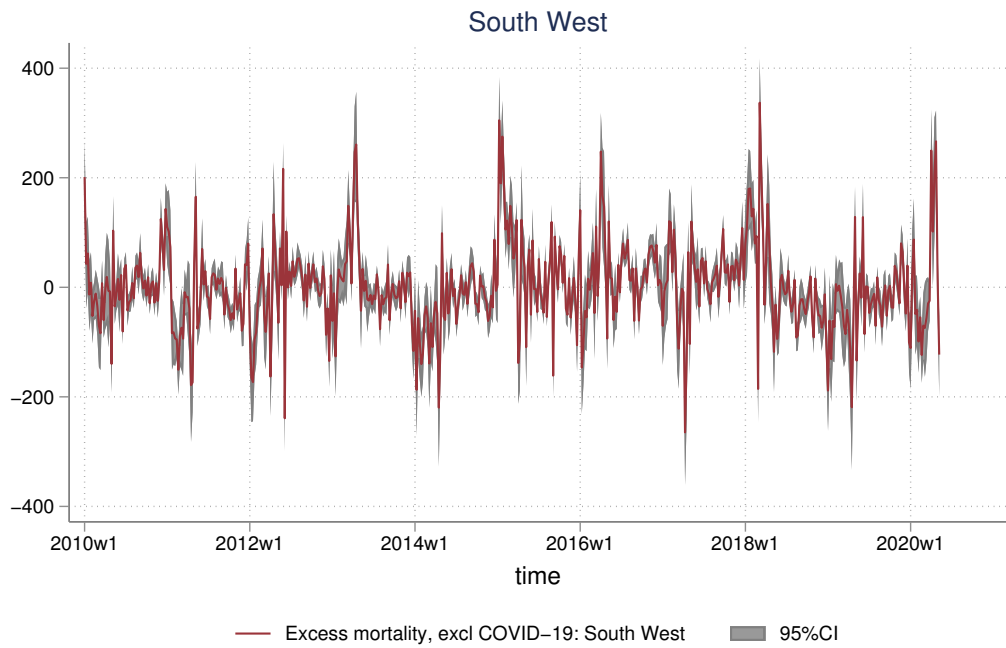

Figure 98: SW all-cause excess deaths minus COVID19, from 2019 week 1

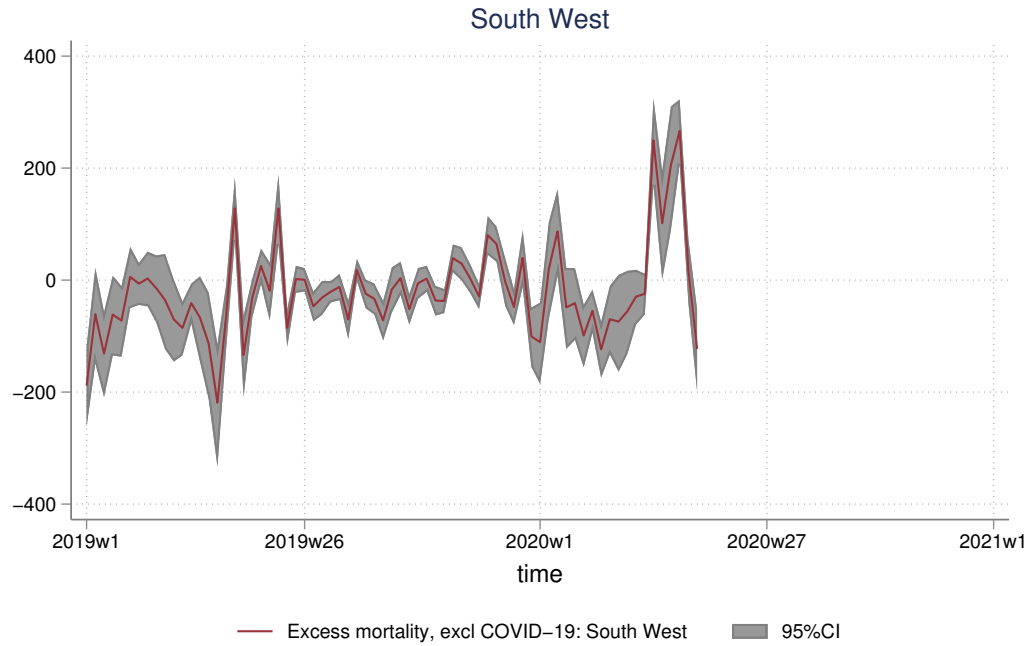

Figure 99: SW all-cause excess deaths minus COVID19, from 2020 week 1

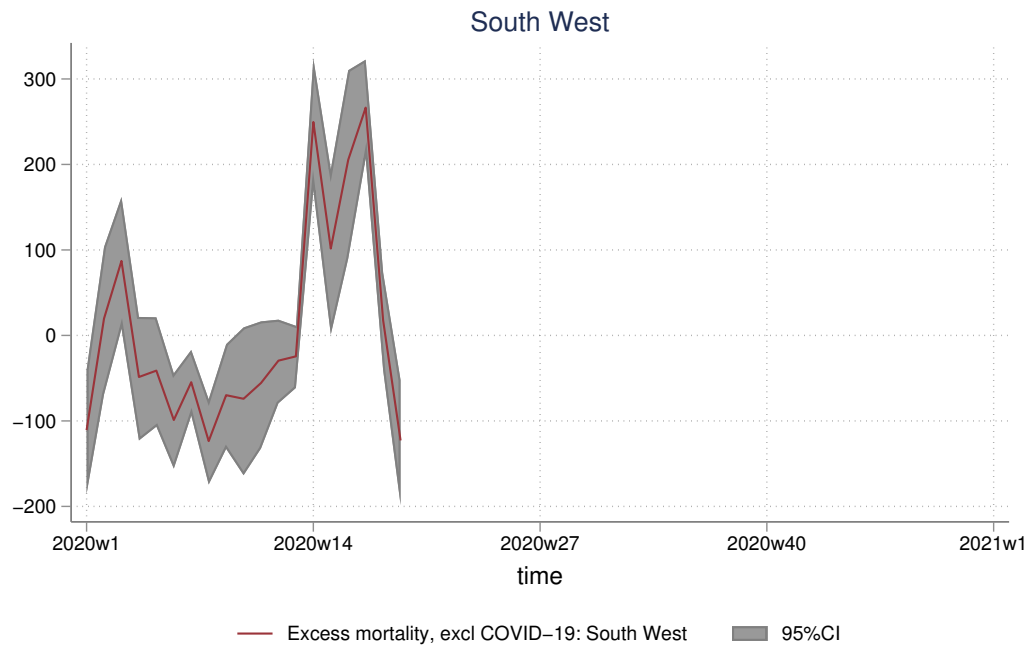



## 2.11 Wales

Figure 100: Wales Mortality time trend and model, from 2010 week 1

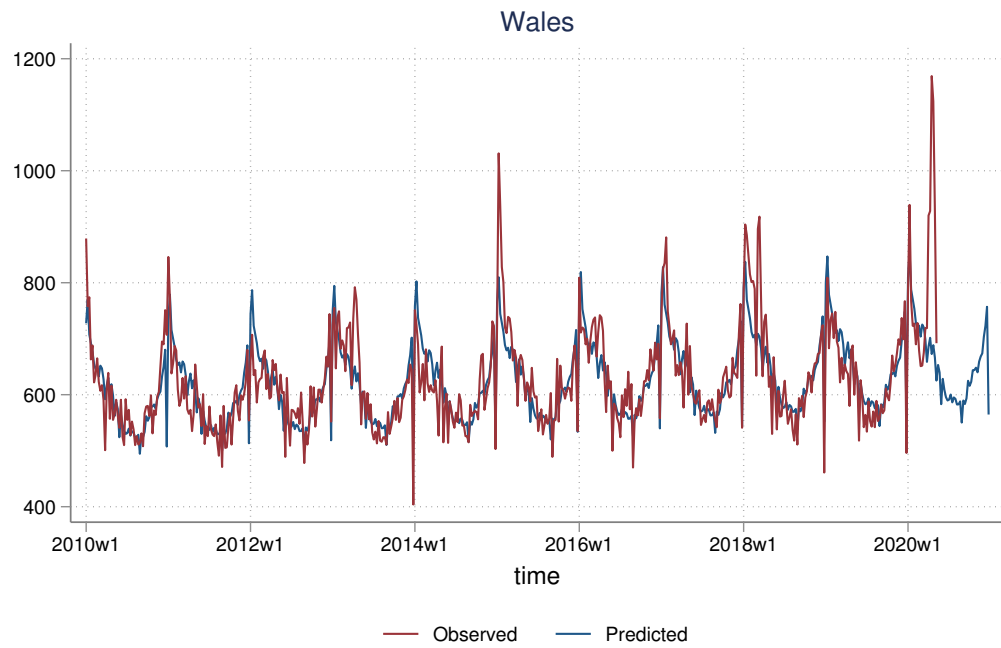

Figure 101: SE Mortality time trend and model, from 2019 week 1

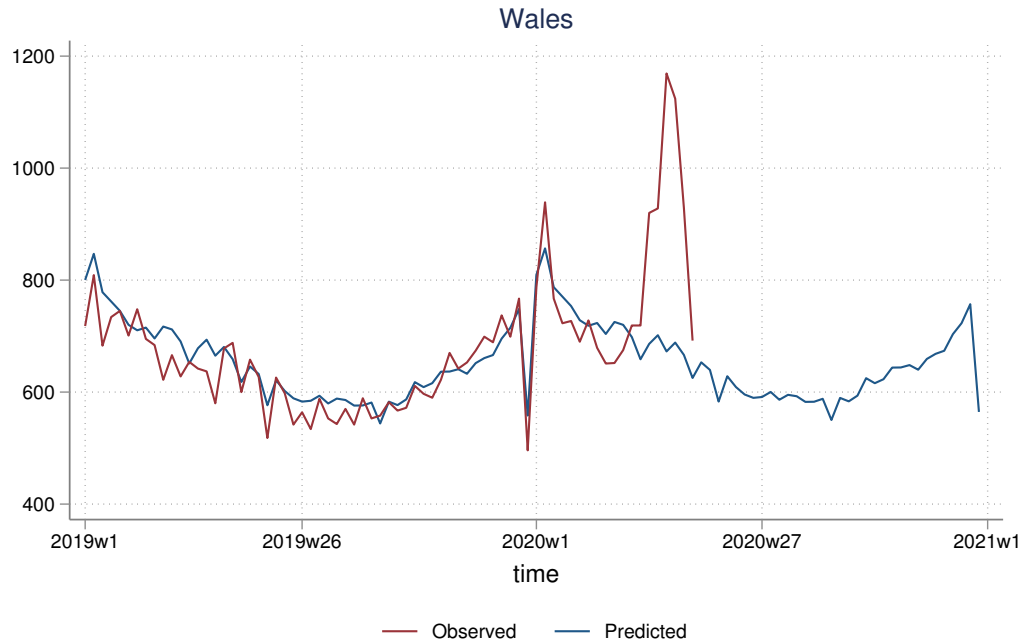

Figure 102: Wales Mortality time trend and model, from 2020 week 1

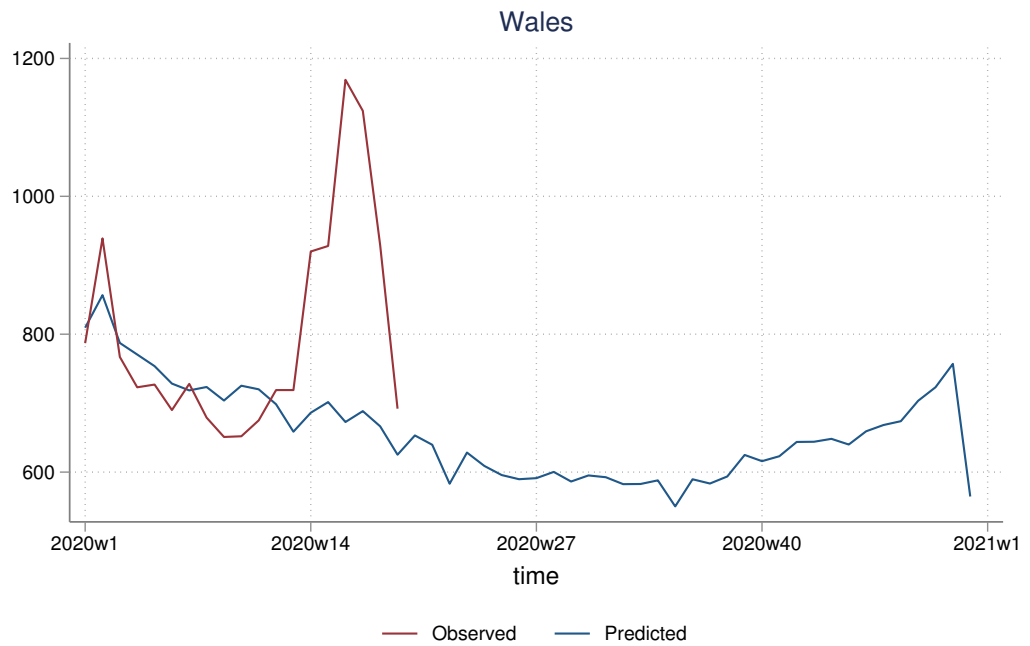

Figure 103: Wales all-cause excess deaths, from 2010 week 1

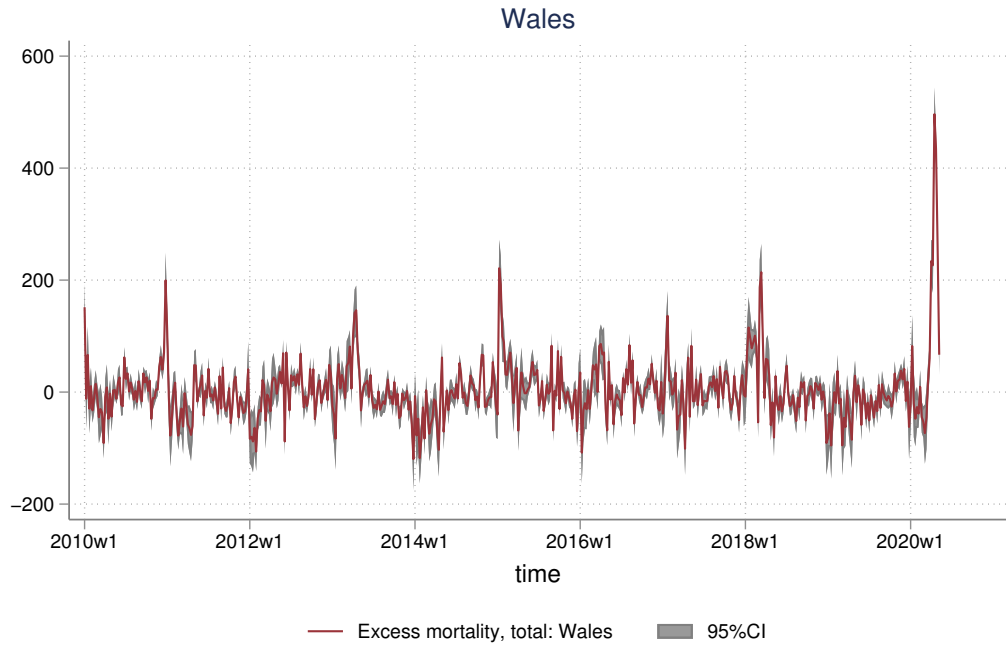

Figure 104: Wales all-cause excess deaths, from 2019 week 1

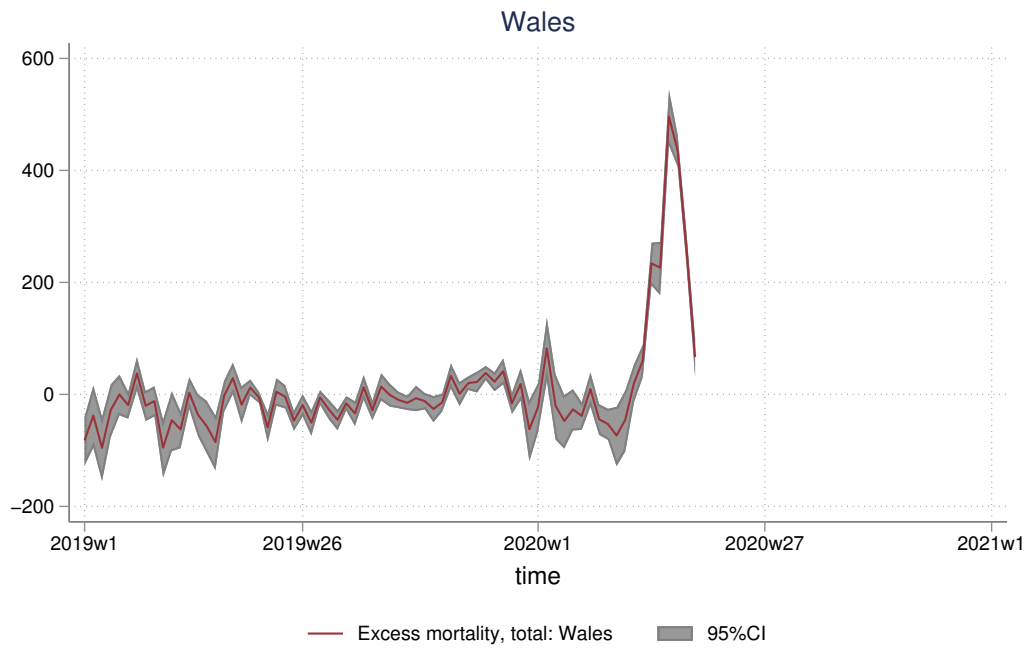

Figure 105: Wales all-cause excess deaths, from 2020 week 1

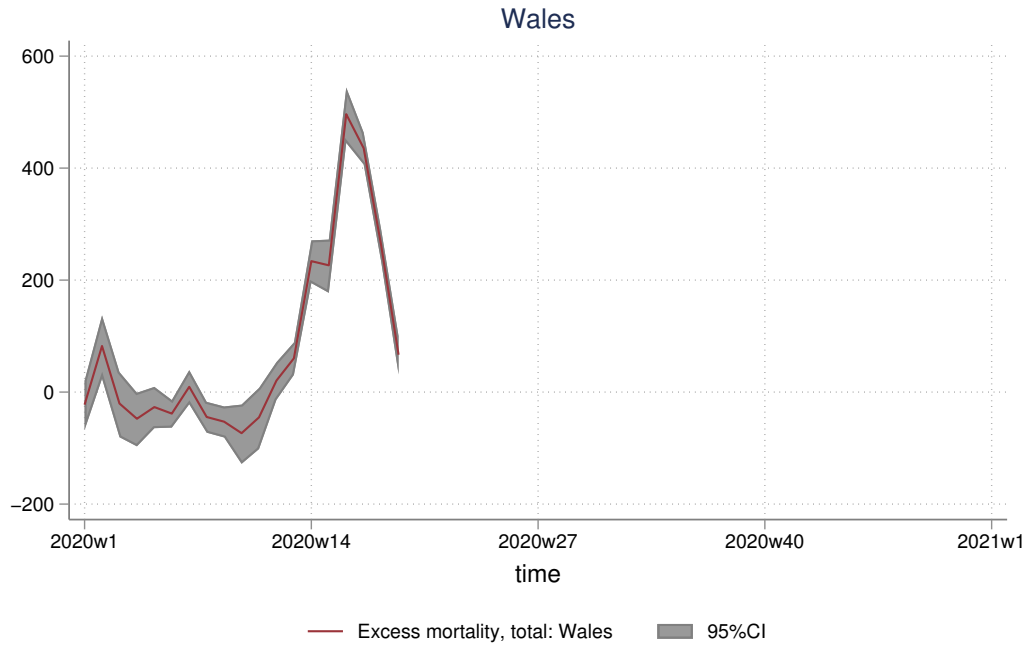

Figure 106: Wales all-cause excess deaths minus COVID19, from 2010 week 1

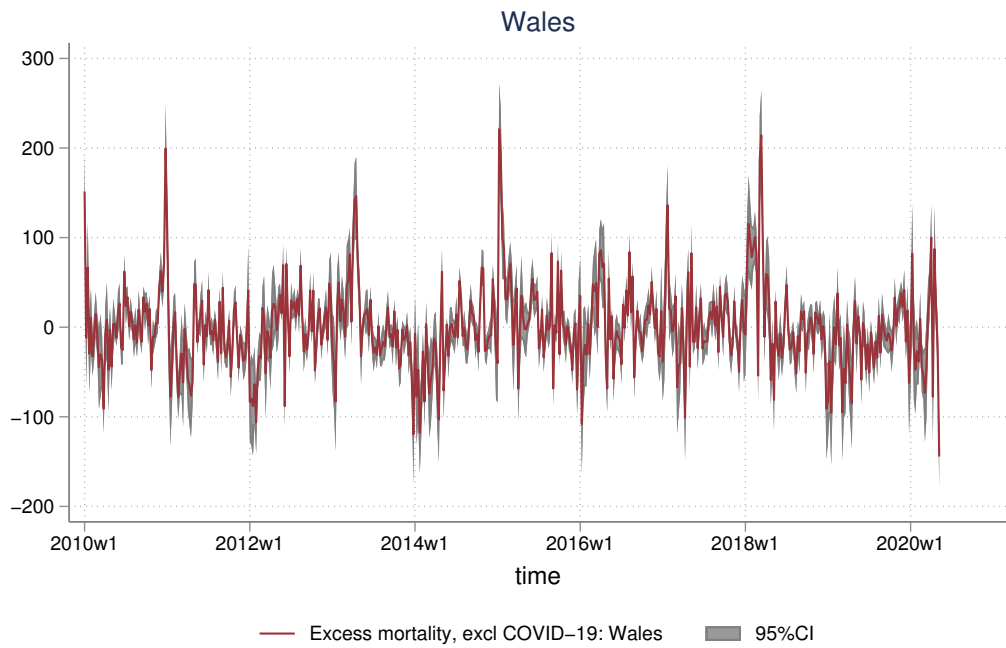

Figure 107: Wales all-cause excess deaths minus COVID19, from 2019 week 1

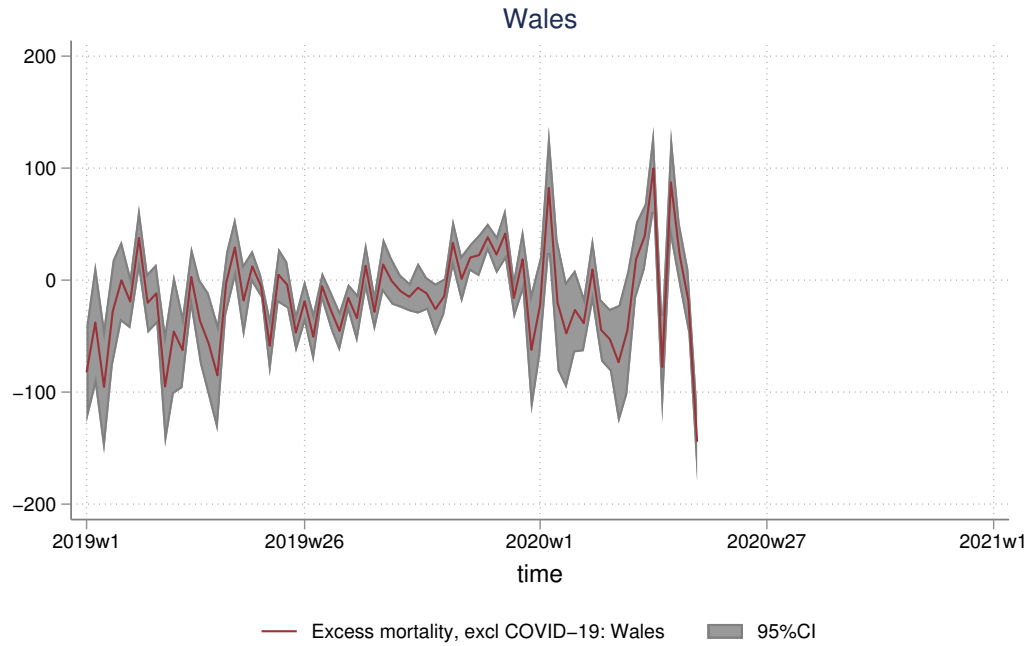

Figure 108: Wales all-cause excess deaths minus COVID19, from 2020 week 1

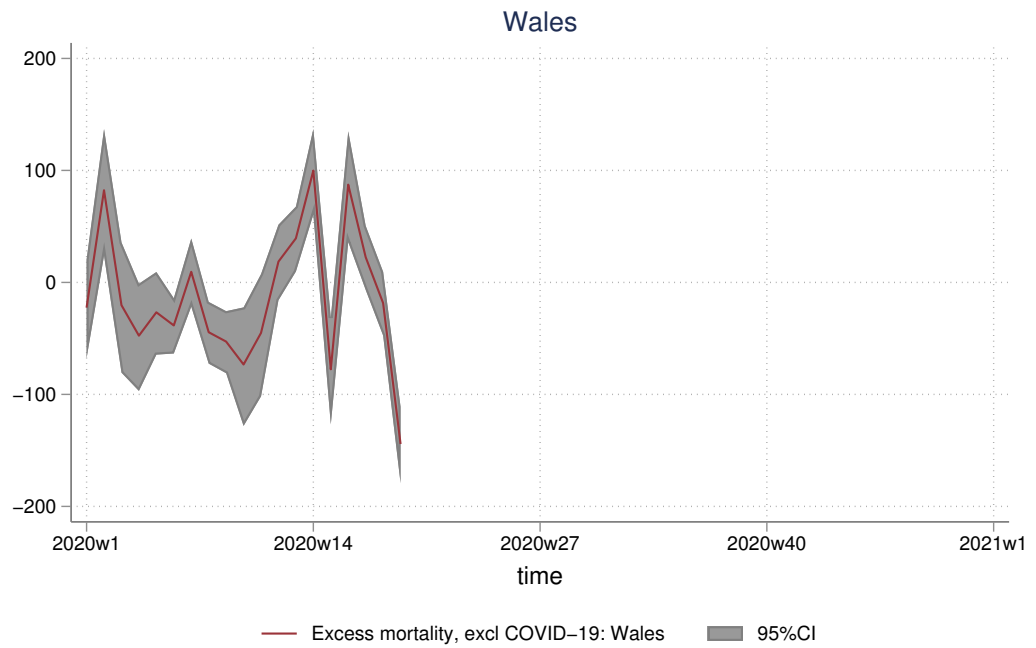

### 3 Age groups, people

#### 3.1 Time trends

Figure 109: All age group mortality time trends, from 2010 week 1

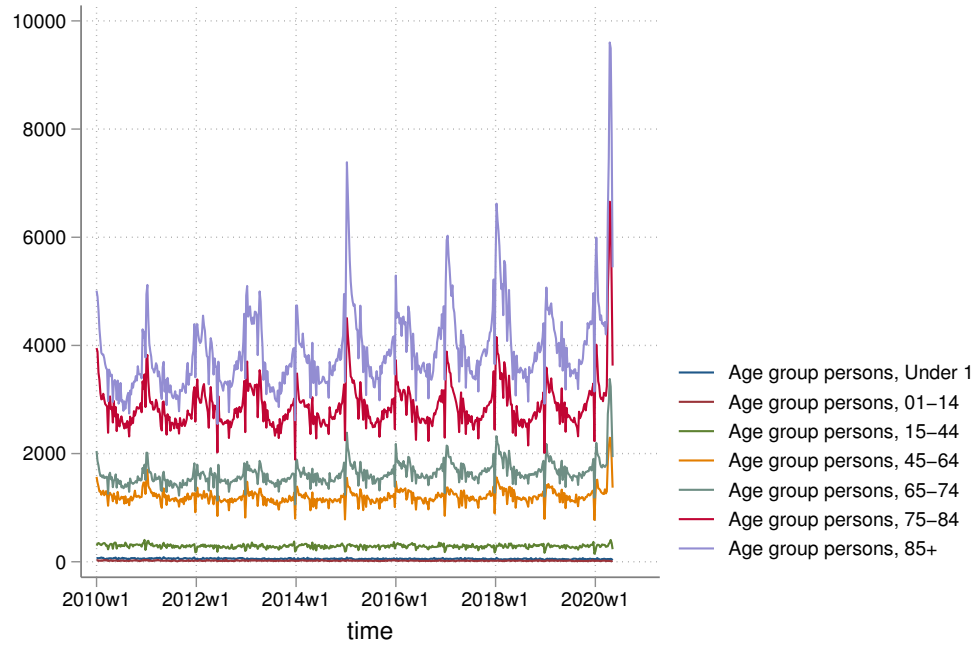

Figure 110: All age group mortality time trends, from 2019 week 1

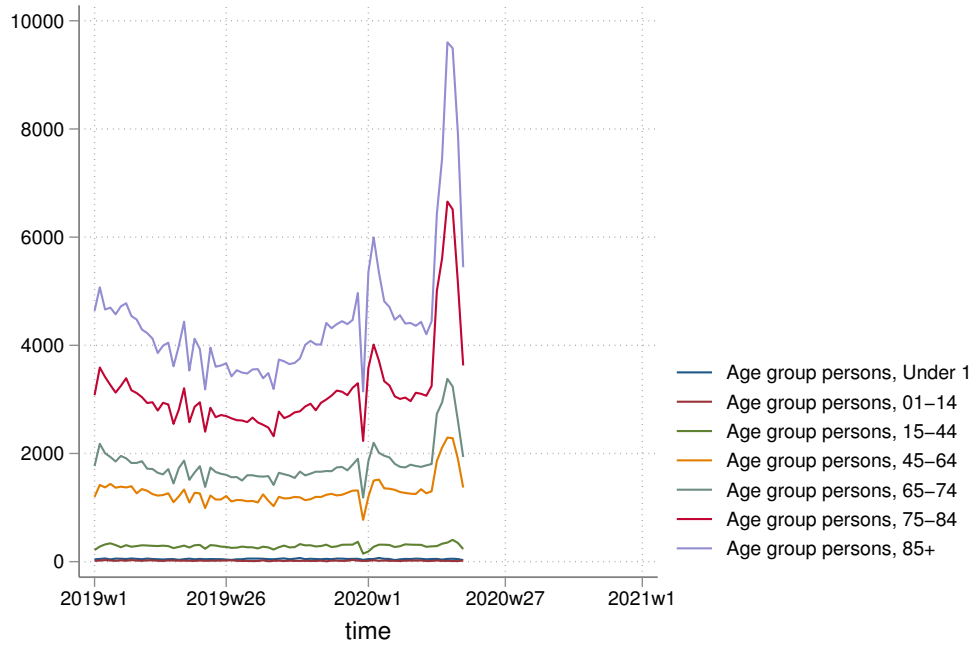

Figure 111: All age group mortality time trends, from 2020 week 1

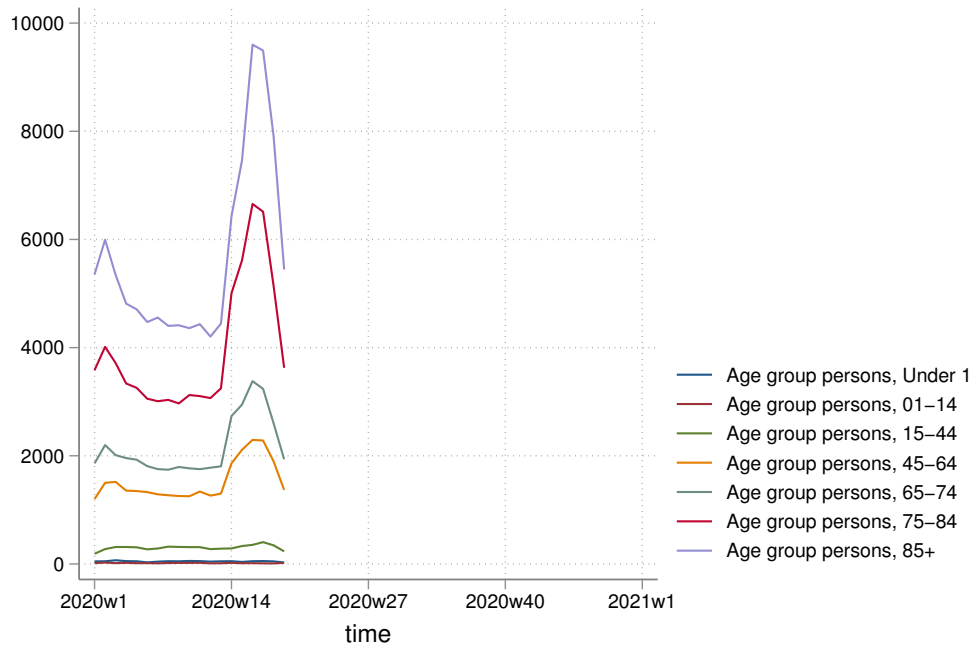

### 3.2 All aged under 1

Figure 112: All < 1 mortality time trend and model, from 2010 week 1

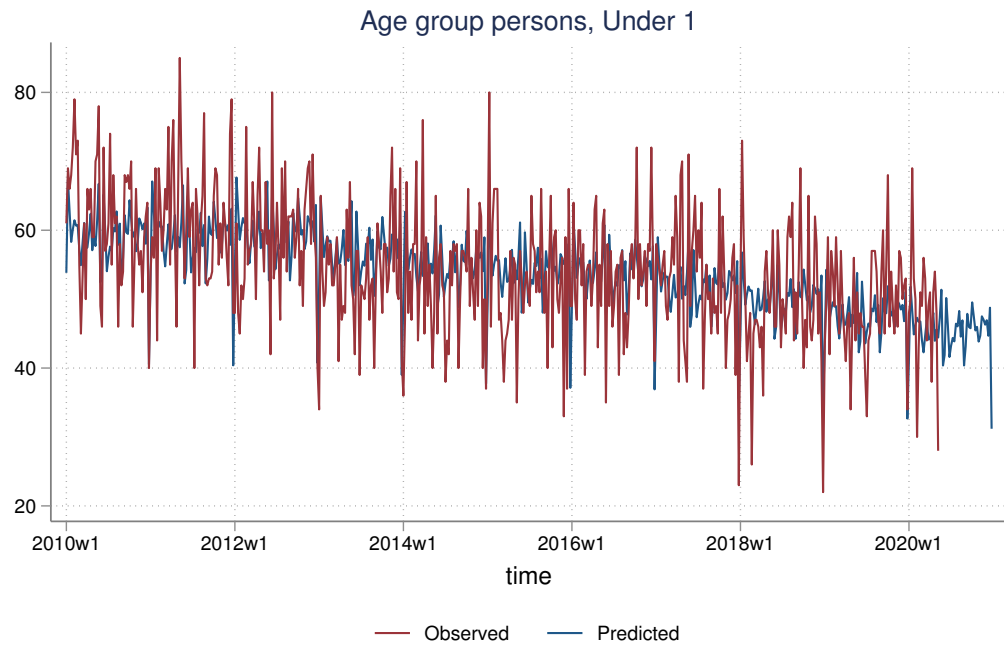



Figure 113: All < 1 mortality time trend and model, from 2019 week 1

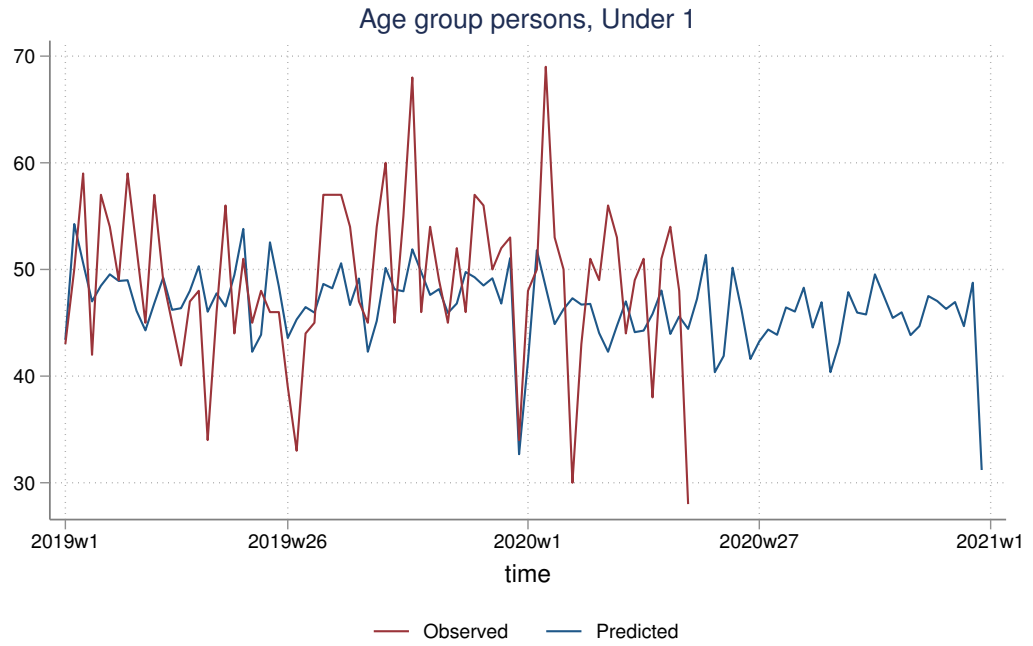

Figure 114: All < 1 mortality time trend and model, from 2020 week 1

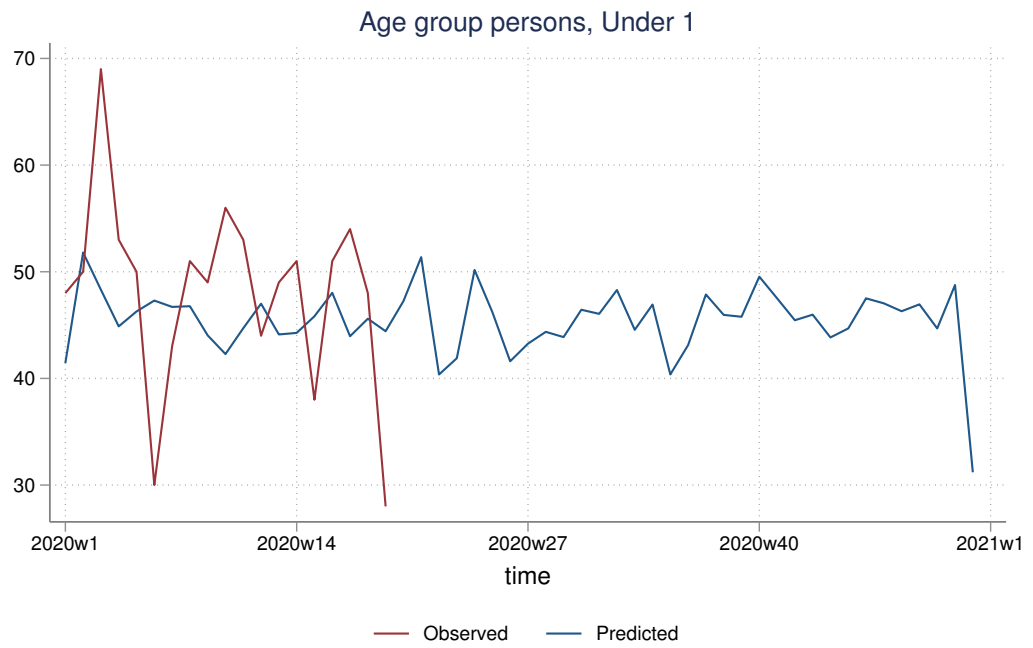

Figure 115: All < 1 all-cause excess deaths, from 2010 week 1

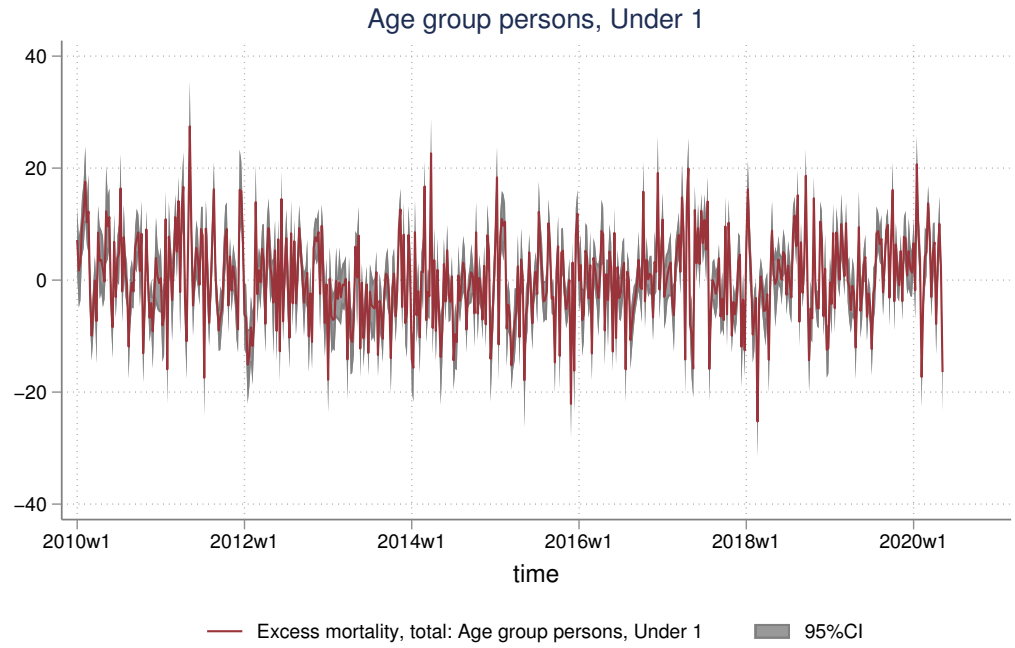

Figure 116: All < 1 all-cause excess deaths, from 2019 week 1

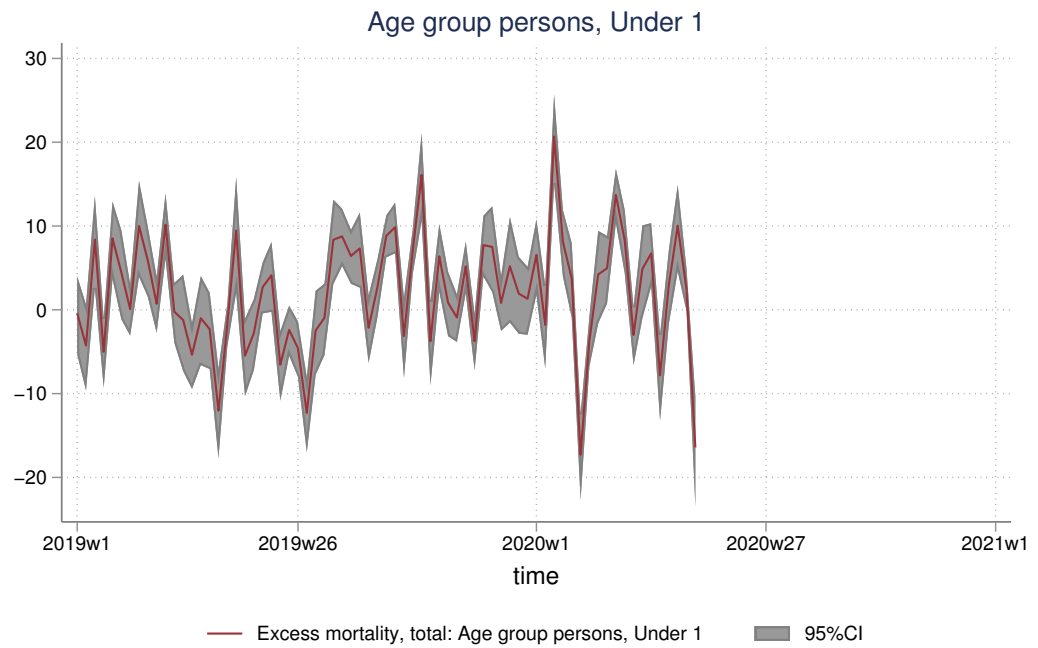

Figure 117: All < 1 all-cause excess deaths, from 2020 week 1

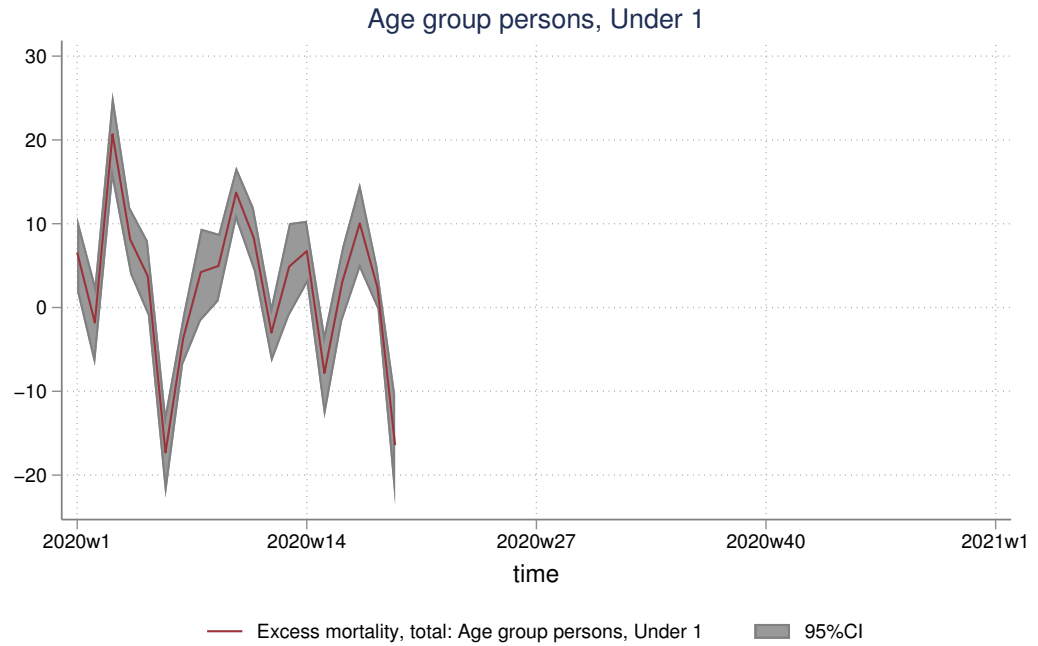

Figure 118: All < 1 all-cause excess deaths minus COVID19, from 2010 week 1

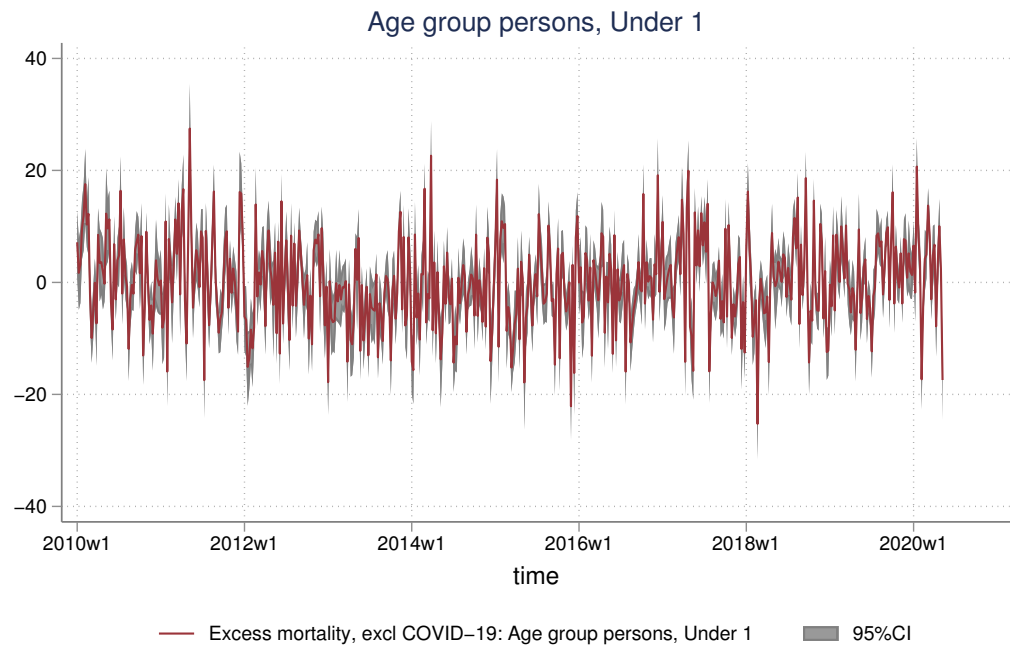

Figure 119: All < 1 all-cause excess deaths minus COVID19, from 2019 week 1

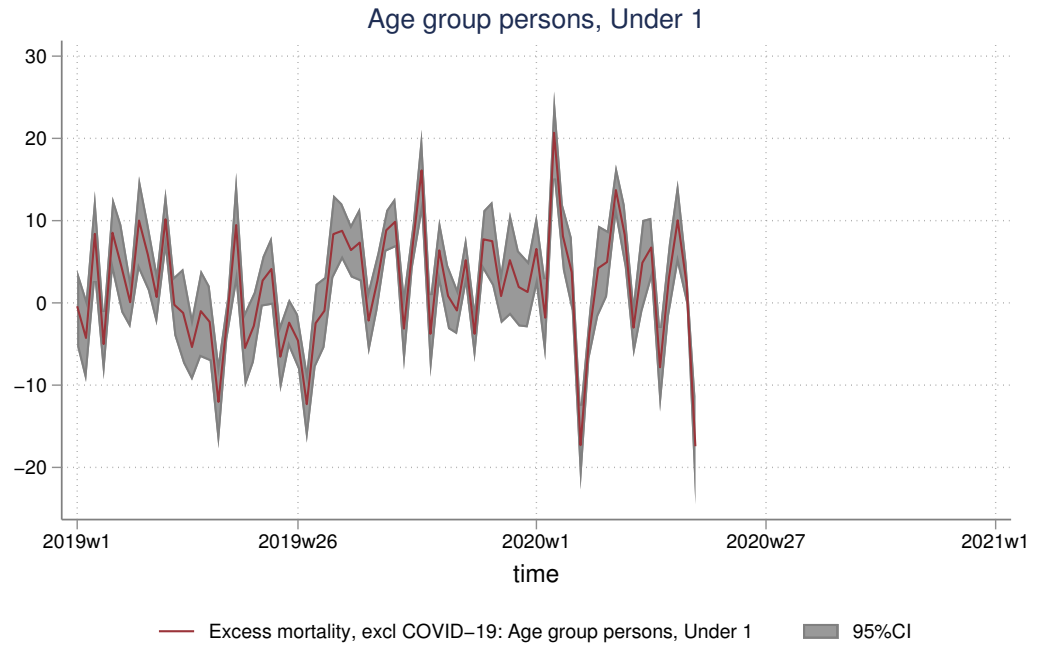

Figure 120: All < 1 all-cause excess deaths minus COVID19, from 2020 week 1

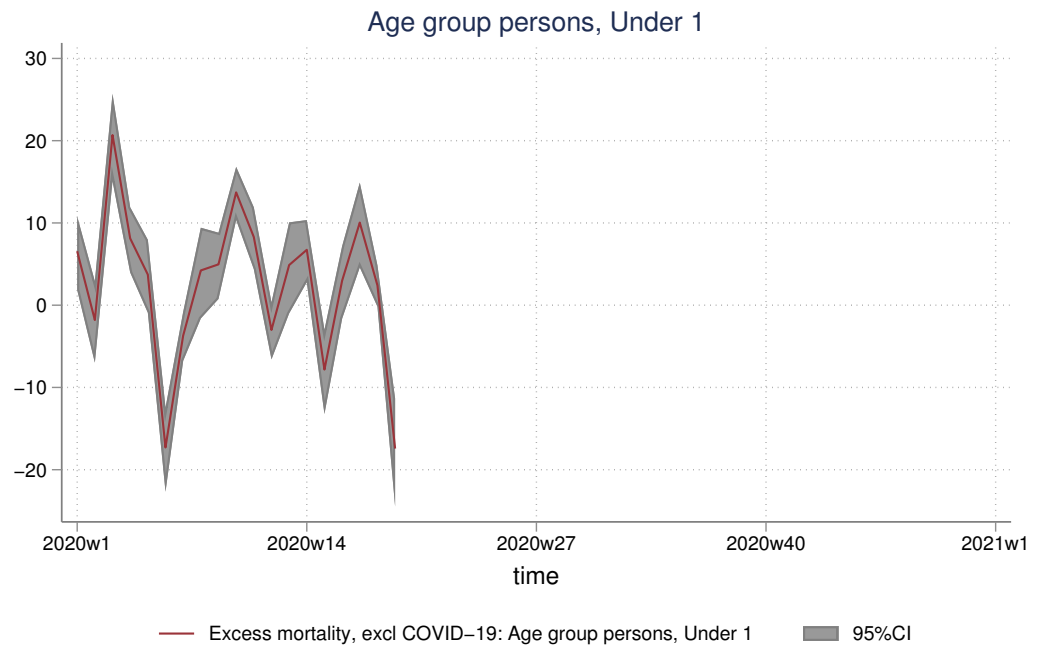

### 3.3 All aged 01-14

Figure 121: All 01-14 mortality time trend and model, from 2010 week 1

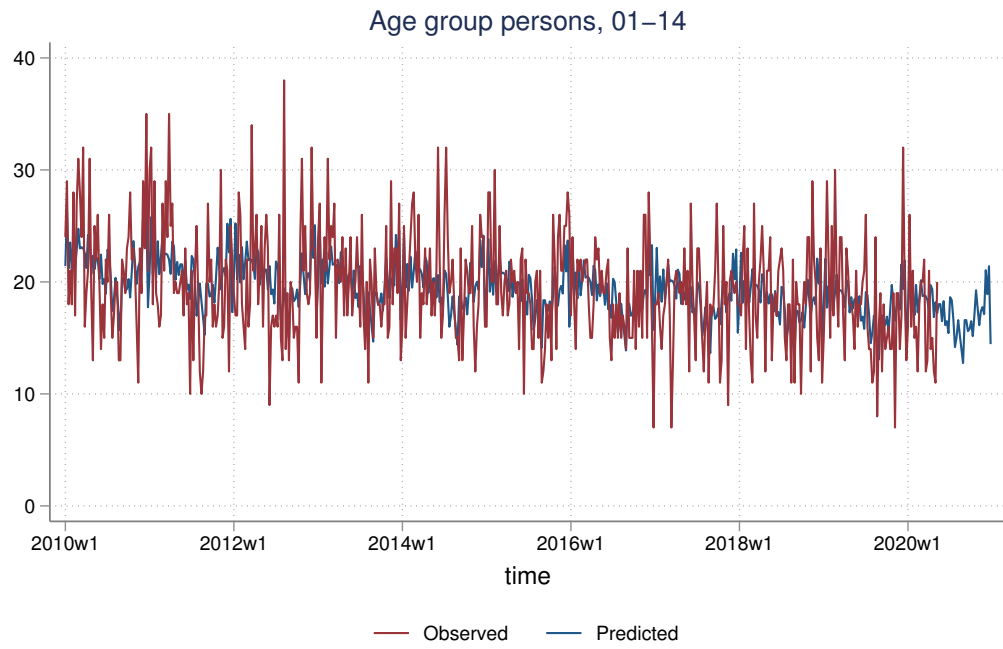

Figure 122: All 01-14 mortality time trend and model, from 2019 week 1

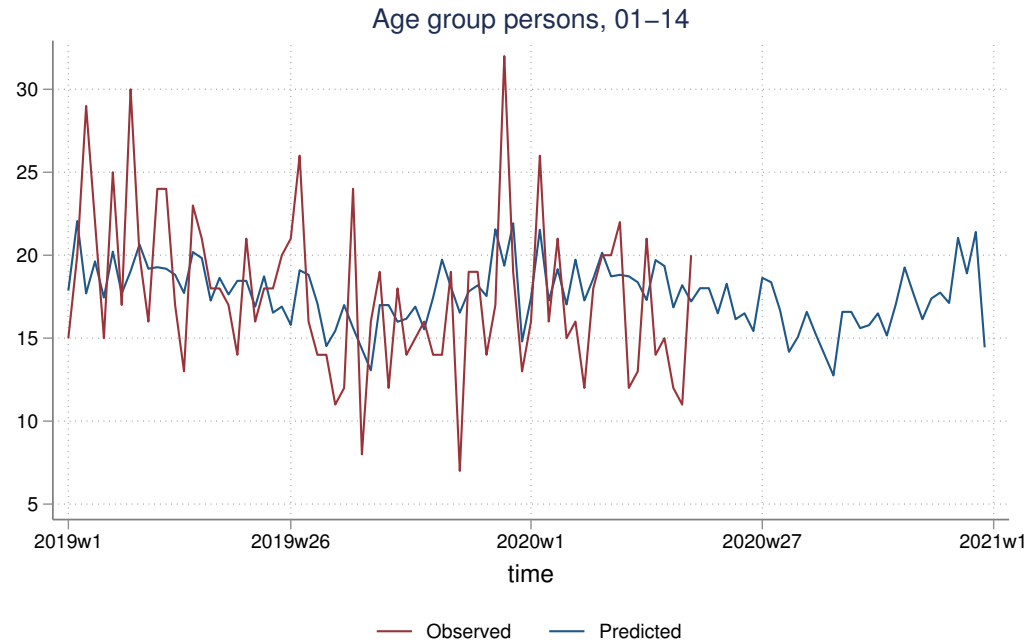

Figure 123: All 01-14 mortality time trend and model, from 2020 week 1

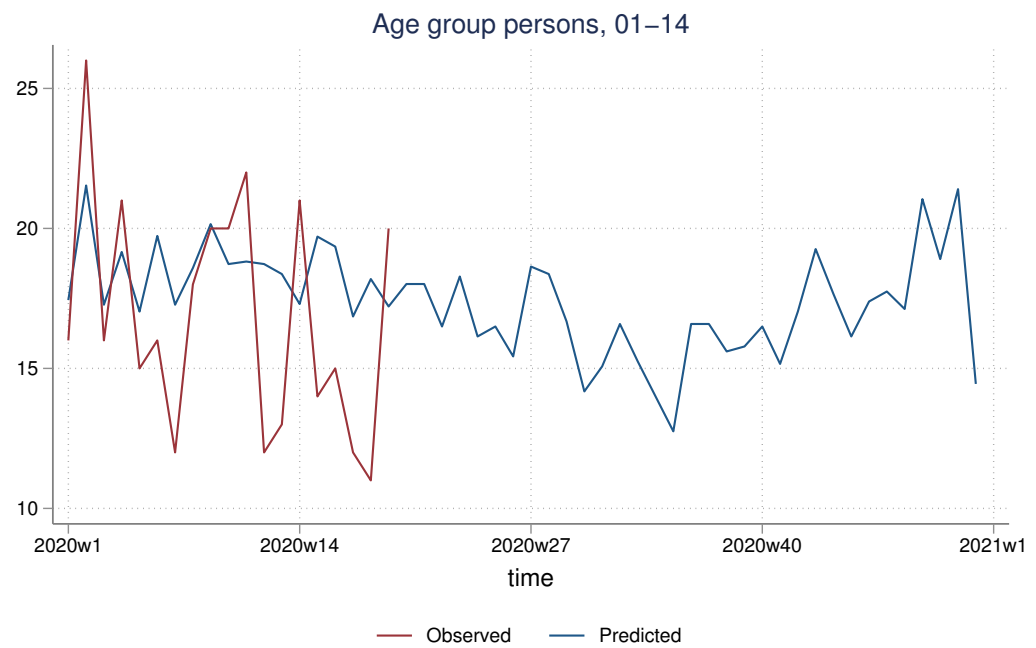

Figure 124: All 01-14 all-cause excess deaths, from 2010 week 1

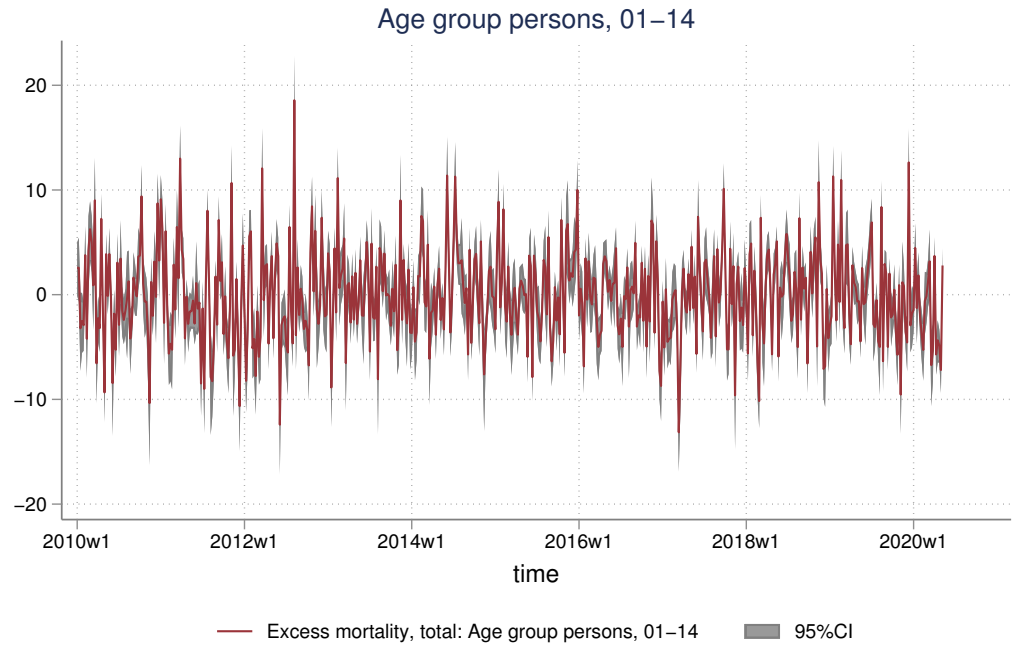

Figure 125: All 01-14 all-cause excess deaths, from 2019 week 1

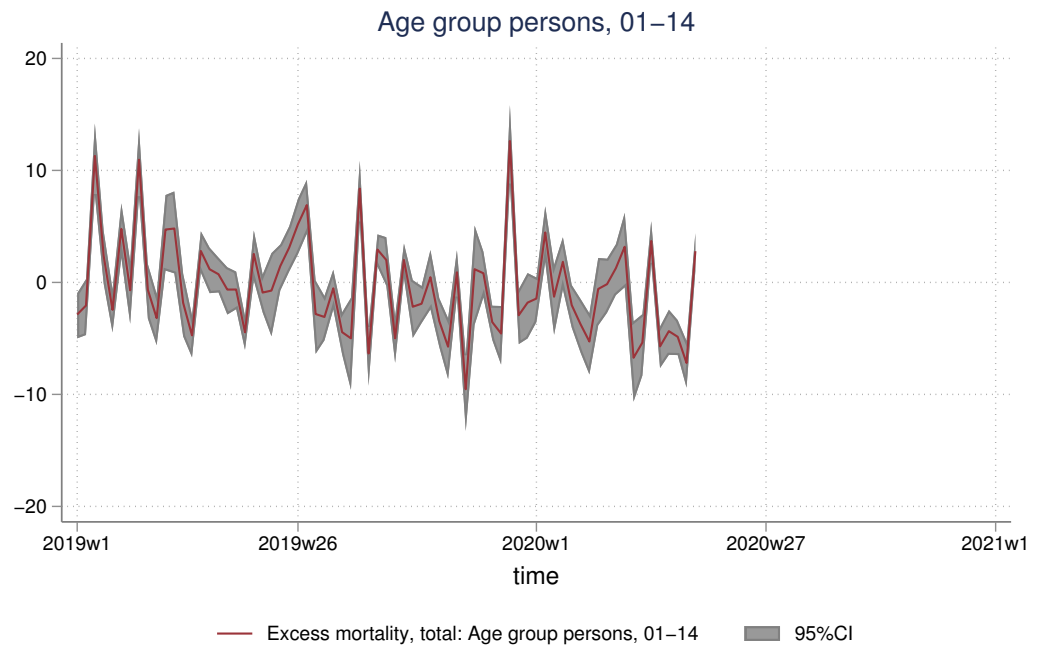

Figure 126: All 01-14 all-cause excess deaths, from 2020 week 1

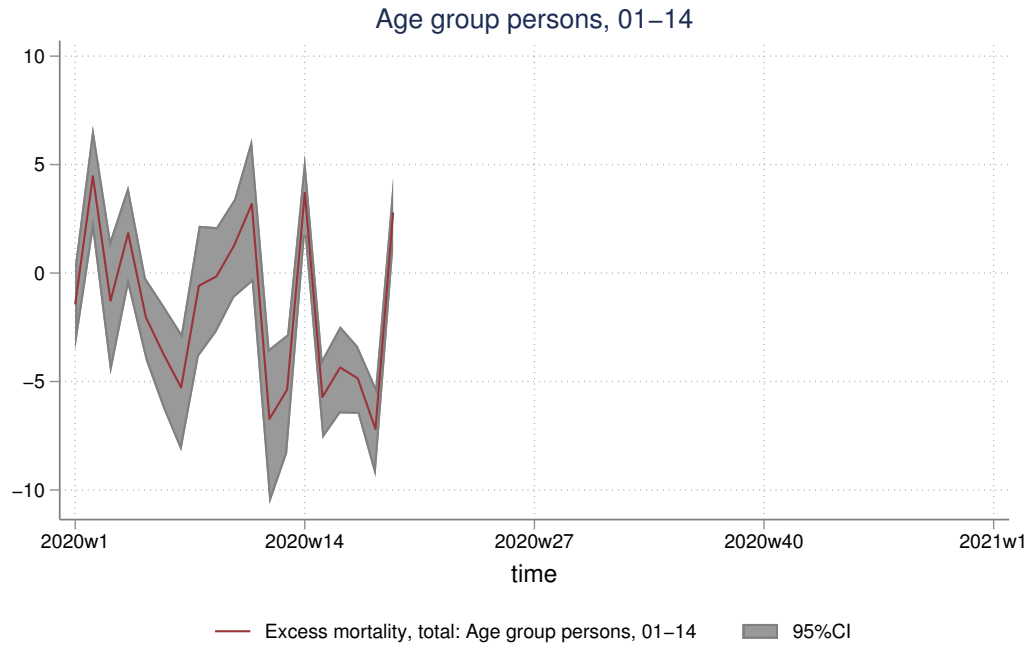

Figure 127: All 01-14 all-cause excess deaths (-COVID19), from 2010 week 1

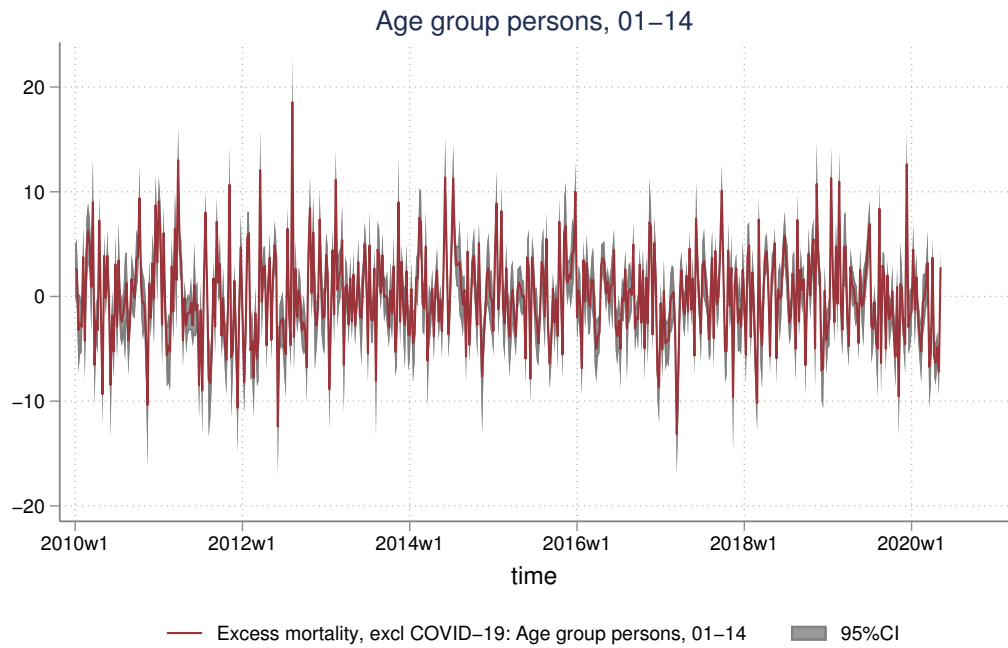



Figure 128: All 01-14 all-cause excess deaths (–COVID19), from 2019 week 1

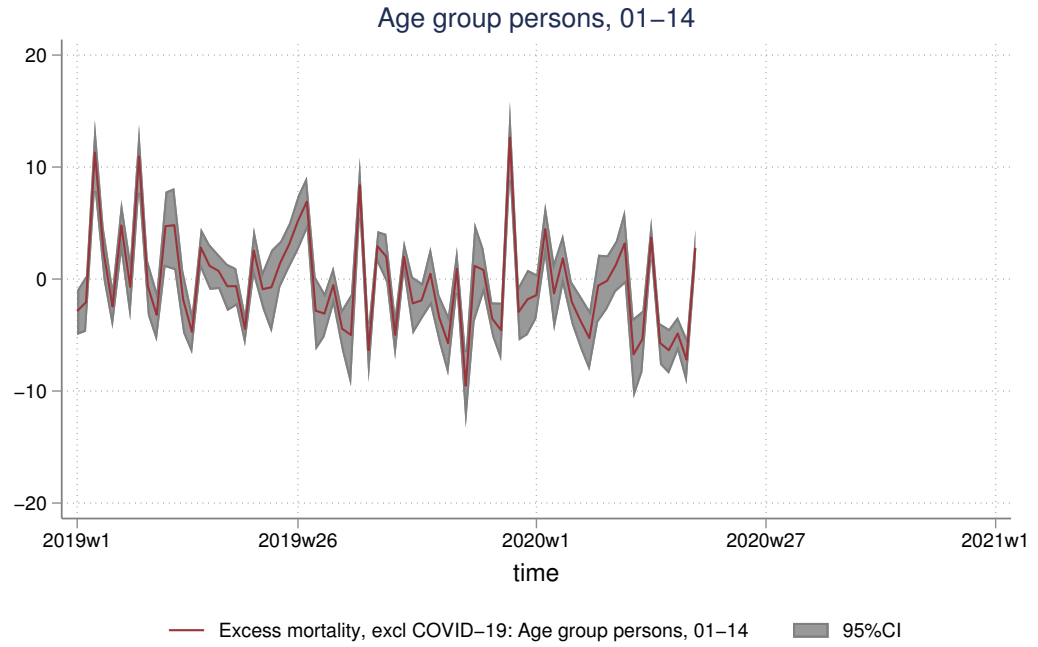

Figure 129: All 01-14 all-cause excess deaths (–COVID19), from 2020 week 1

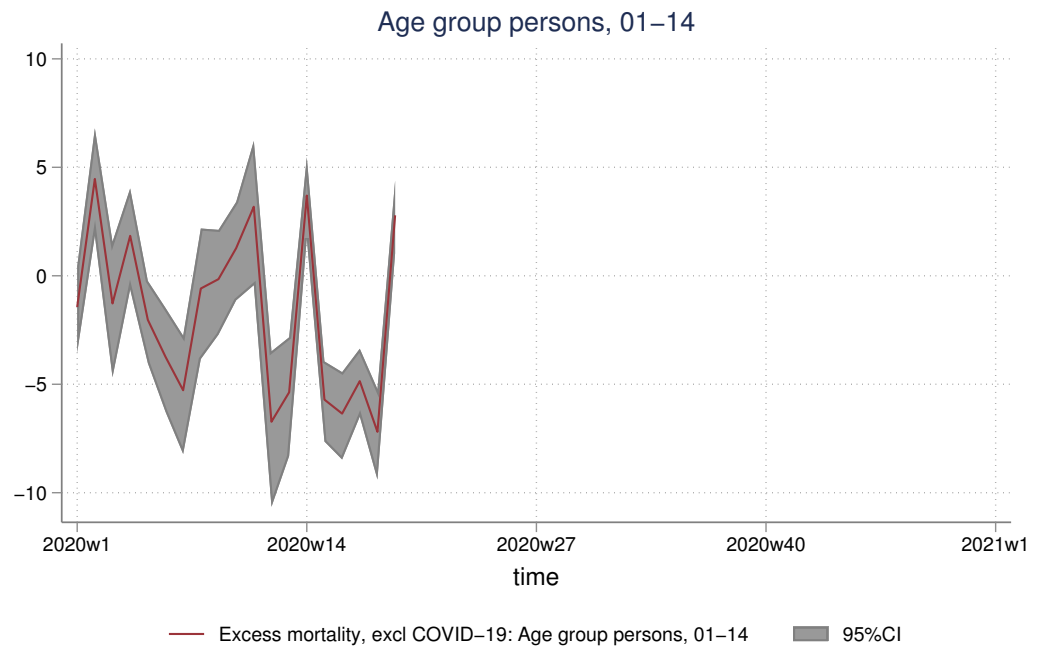

### 3.4 All aged 15-44

Figure 130: All 15-44 mortality time trend and model, from 2010 week 1

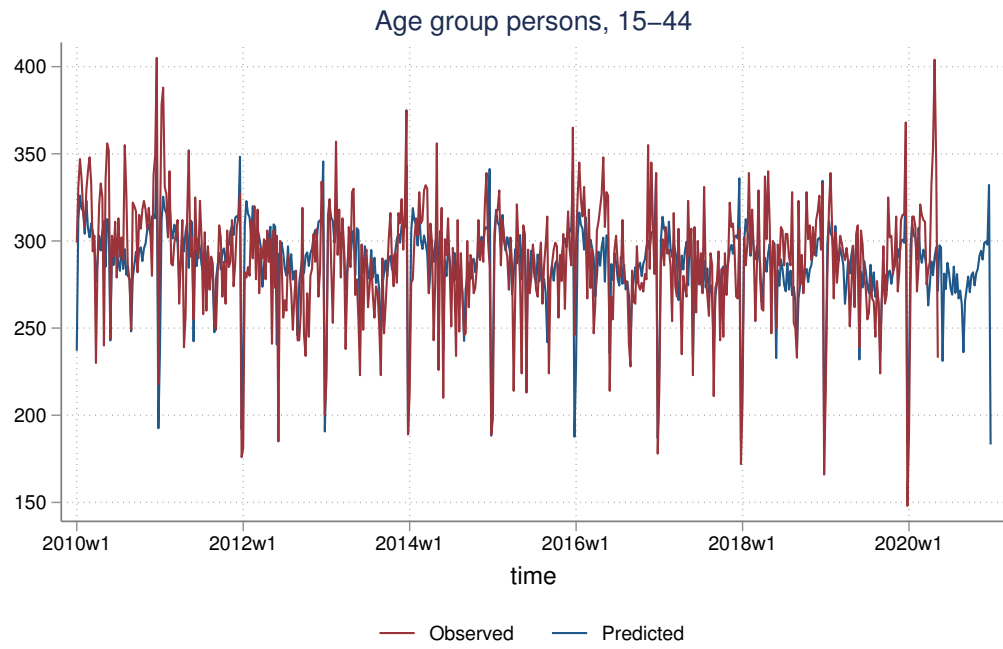

Figure 131: All 15-44 mortality time trend and model, from 2019 week 1

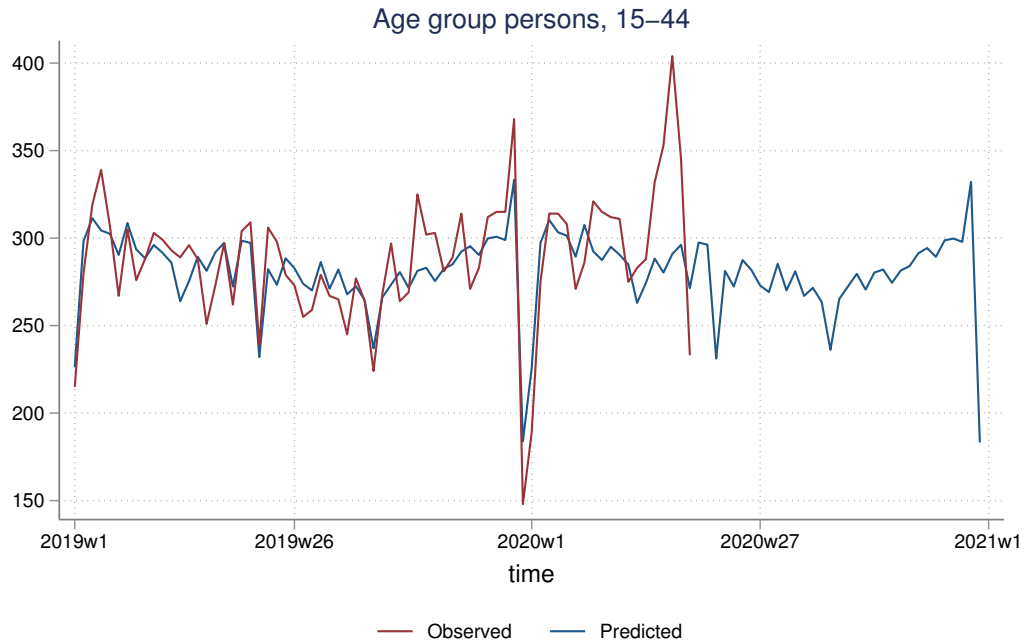

Figure 132: All 15-44 mortality time trend and model, from 2020 week 1

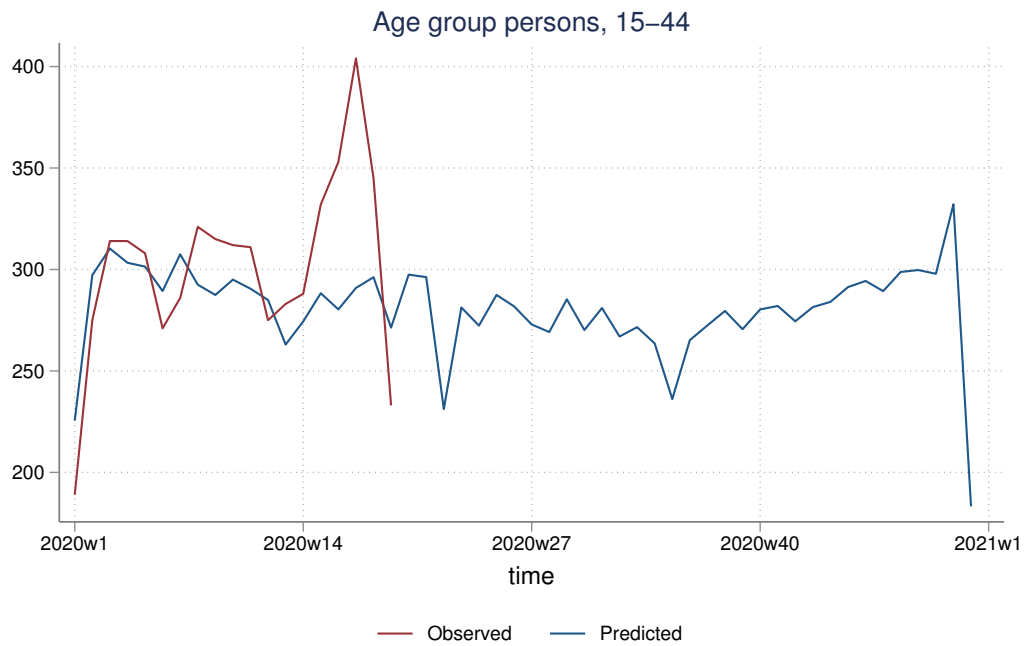

Figure 133: All 15-44 all-cause excess deaths, from 2010 week 1

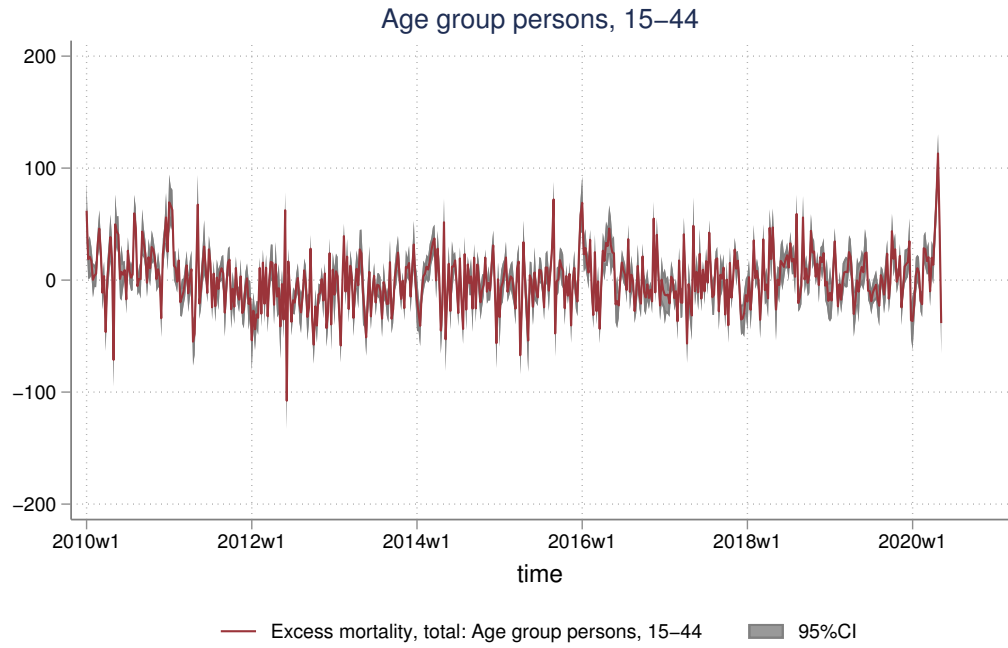

Figure 134: All 15-44 all-cause excess deaths, from 2019 week 1

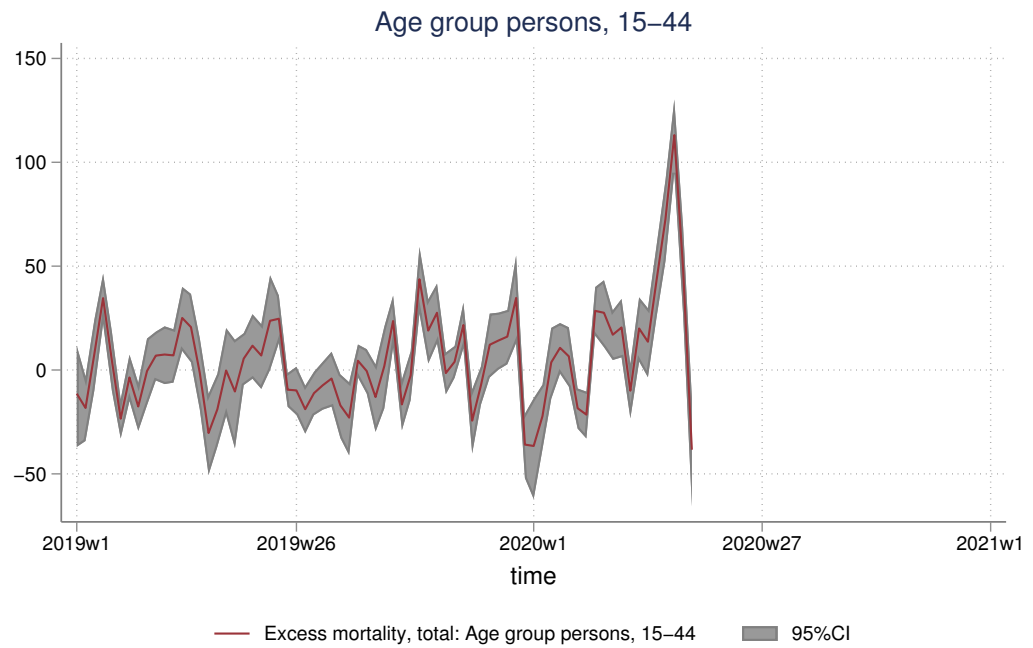

Figure 135: All 15-44 all-cause excess deaths, from 2020 week 1

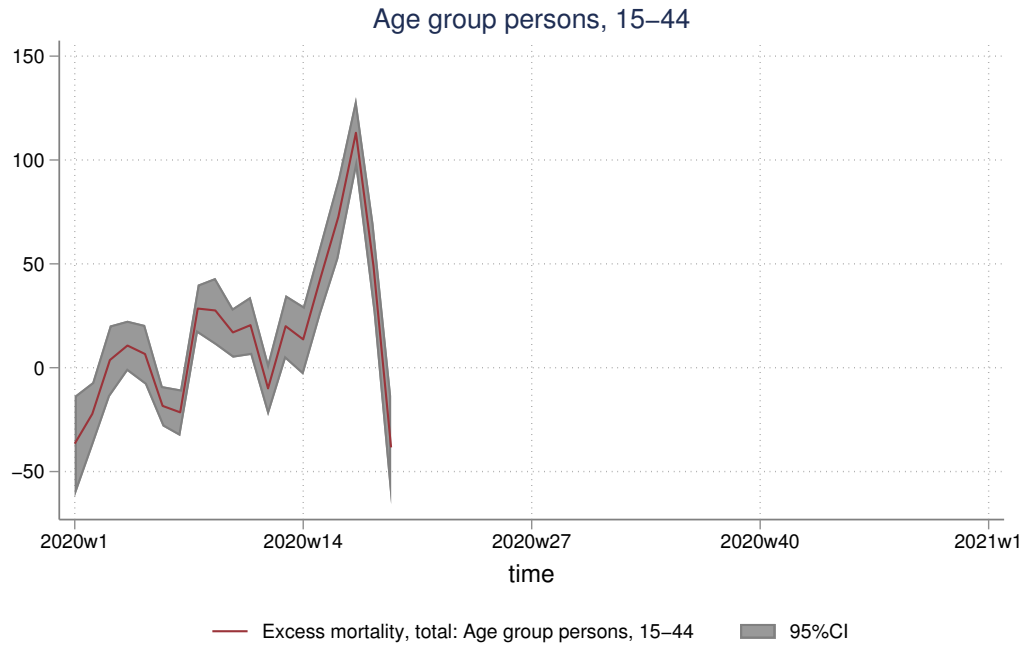

Figure 136: All 15-44 all-cause excess deaths (-COVID19), from 2010 week 1

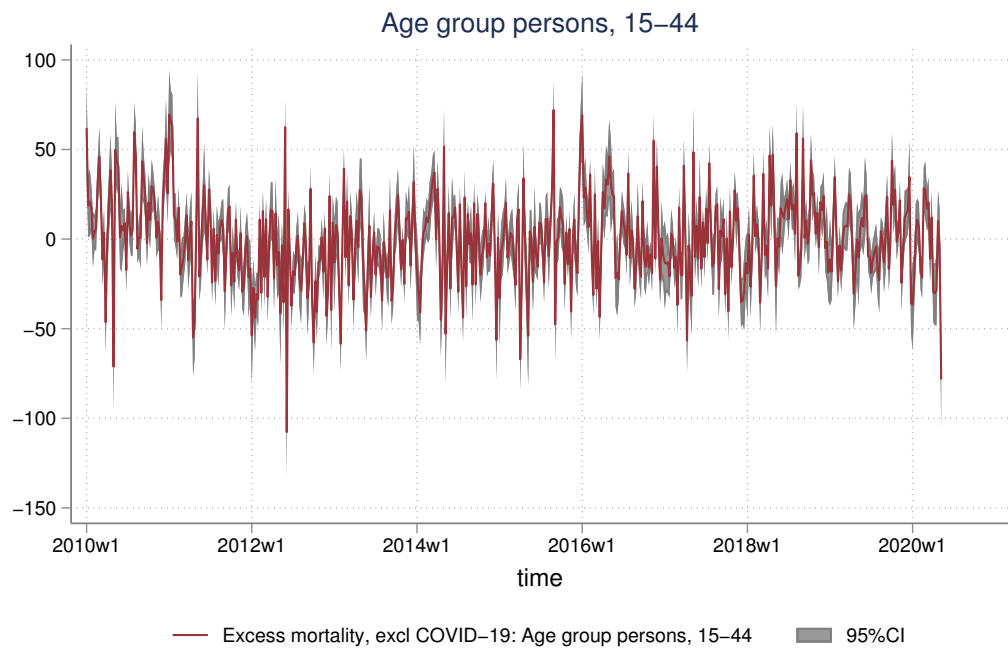

Figure 137: All 15-44 all-cause excess deaths (-COVID19), from 2019 week 1

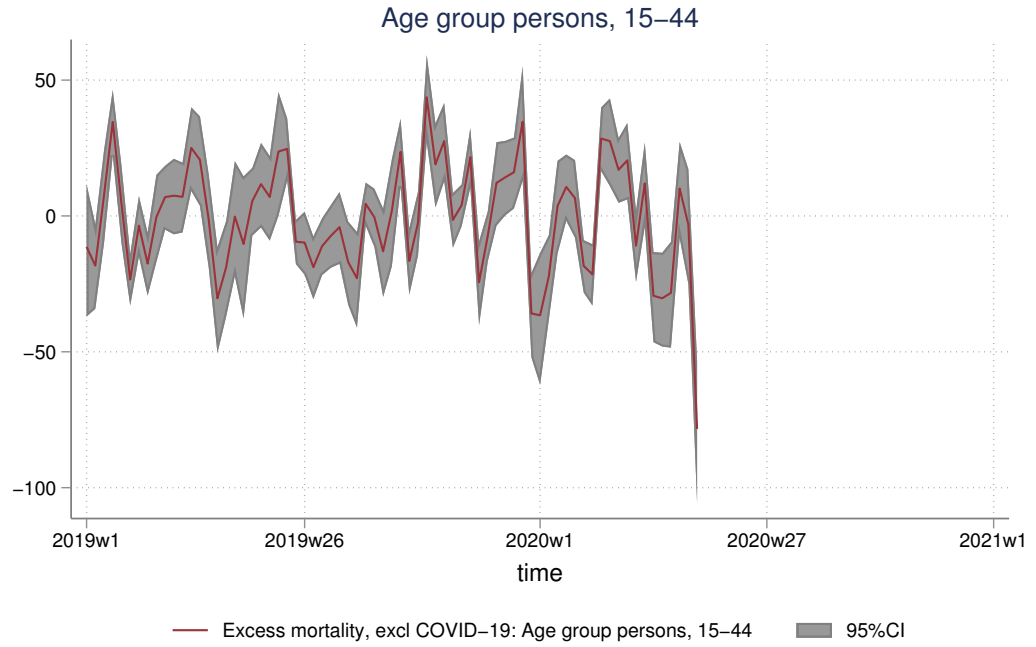

Figure 138: All 15-44 all-cause excess deaths (-COVID19), from 2020 week 1

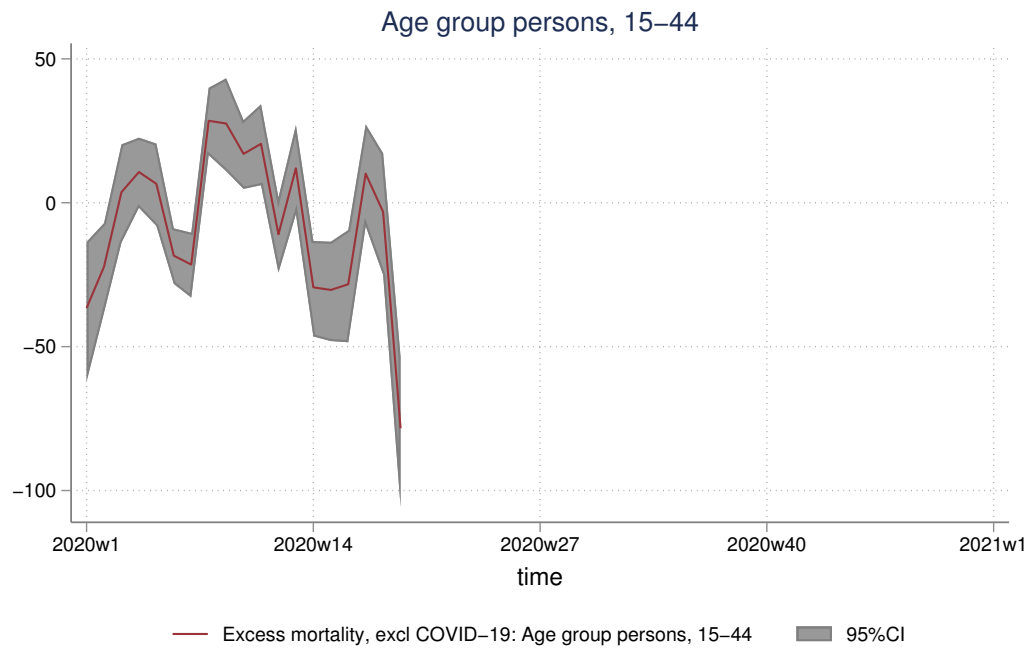

### 3.5 All aged 45-64

Figure 139: All 45-64 mortality time trend and model, from 2010 week 1

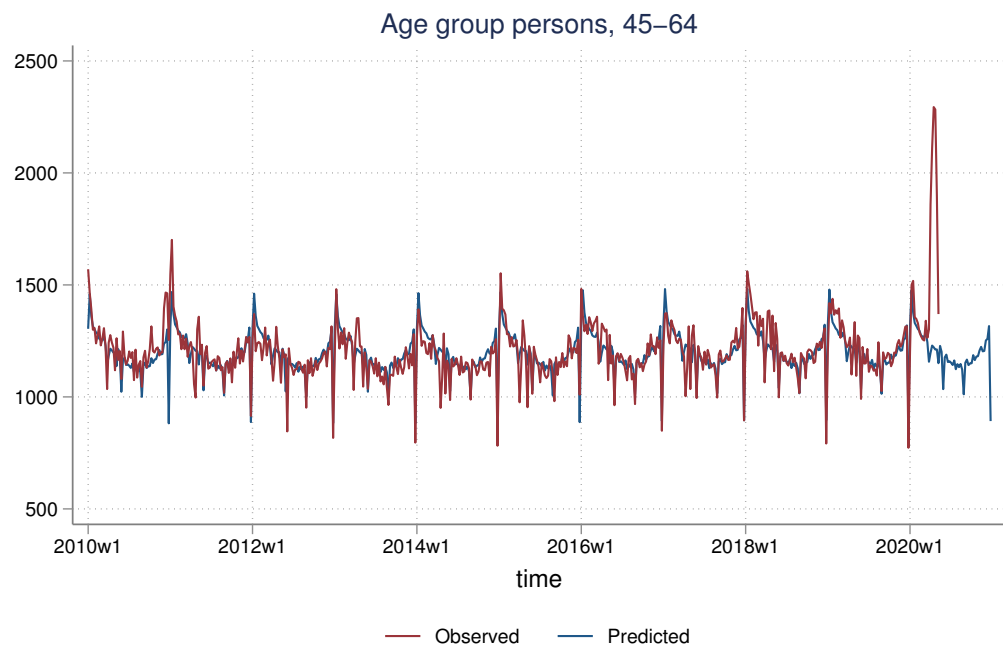

Figure 140: All 45-64 mortality time trend and model, from 2019 week 1

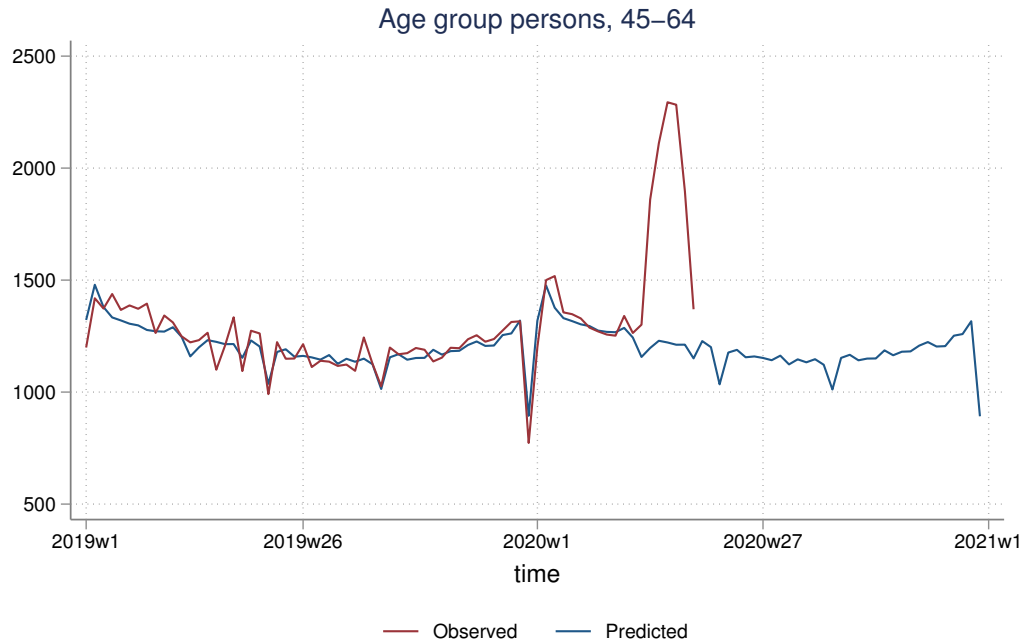

Figure 141: All 45-64 mortality time trend and model, from 2020 week 1

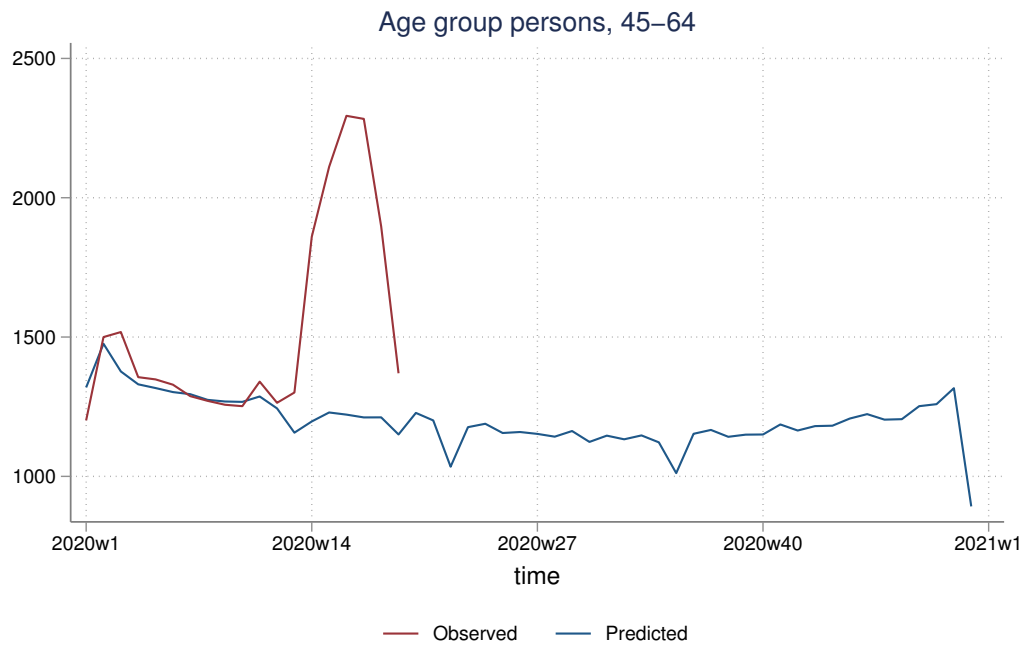



Figure 142: All 45-64 all-cause excess deaths, from 2010 week 1

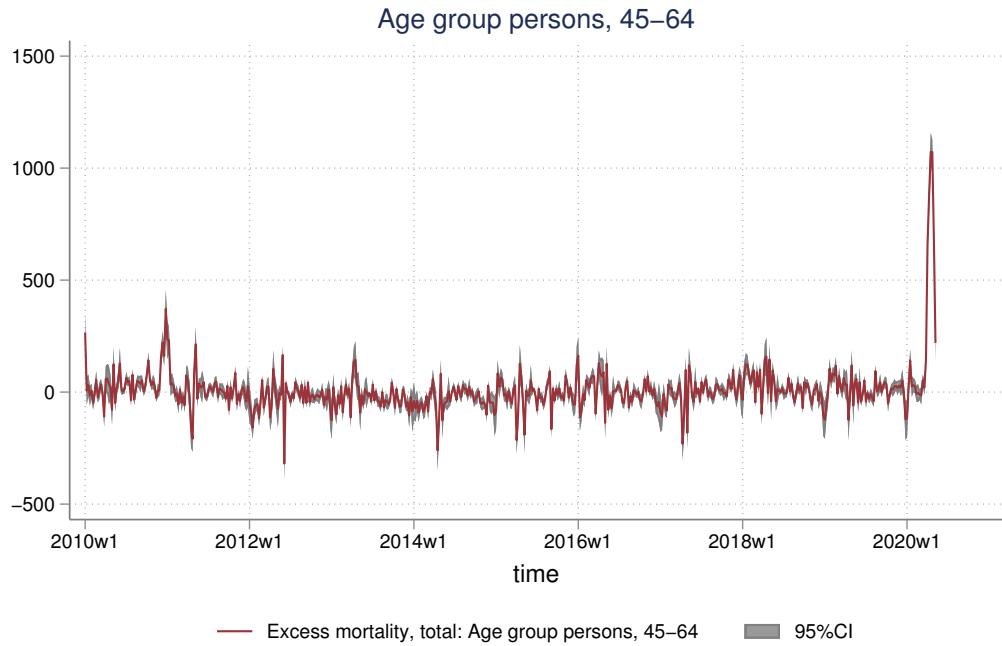

Figure 143: All 45-64 all-cause excess deaths, from 2019 week 1

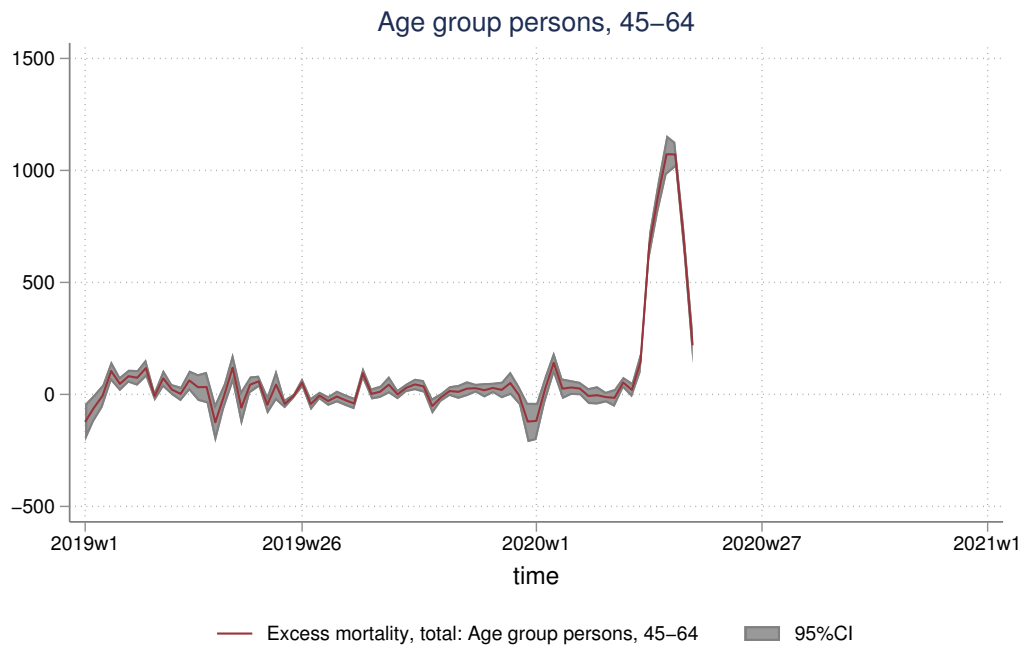

Figure 144: All 45-64 all-cause excess deaths, from 2020 week 1

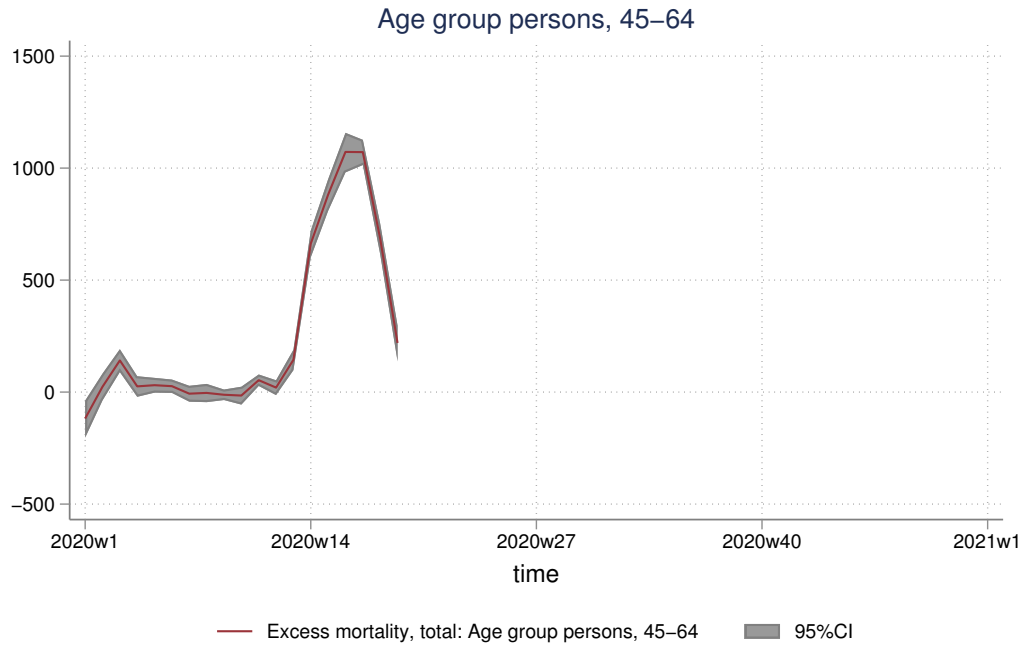

Figure 145: All 45-64 all-cause excess deaths (-COVID19), from 2010 week 1

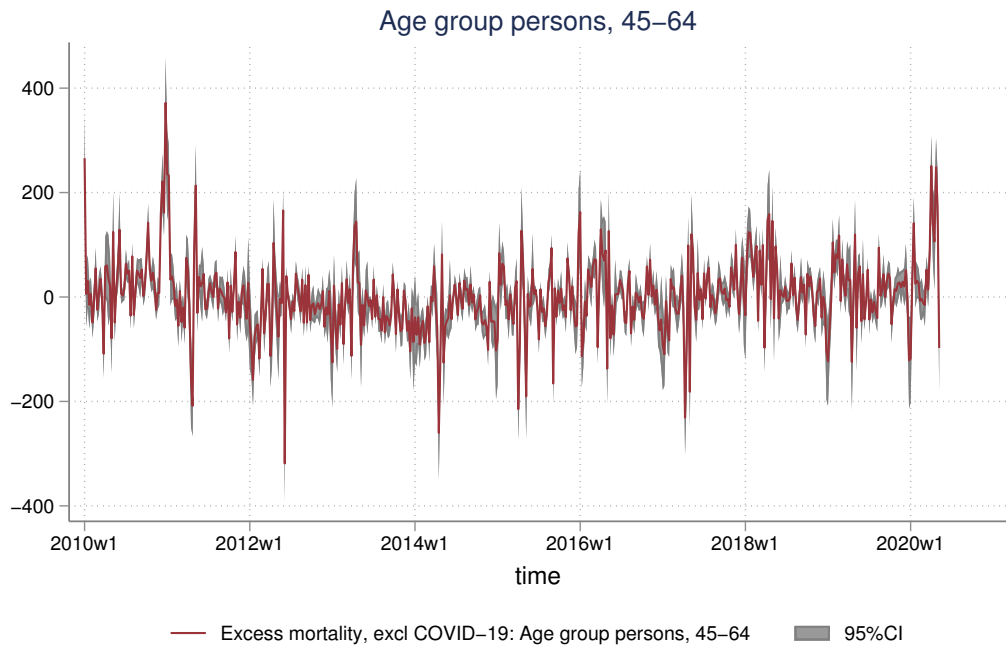

Figure 146: All 45-64 all-cause excess deaths (-COVID19), from 2019 week 1

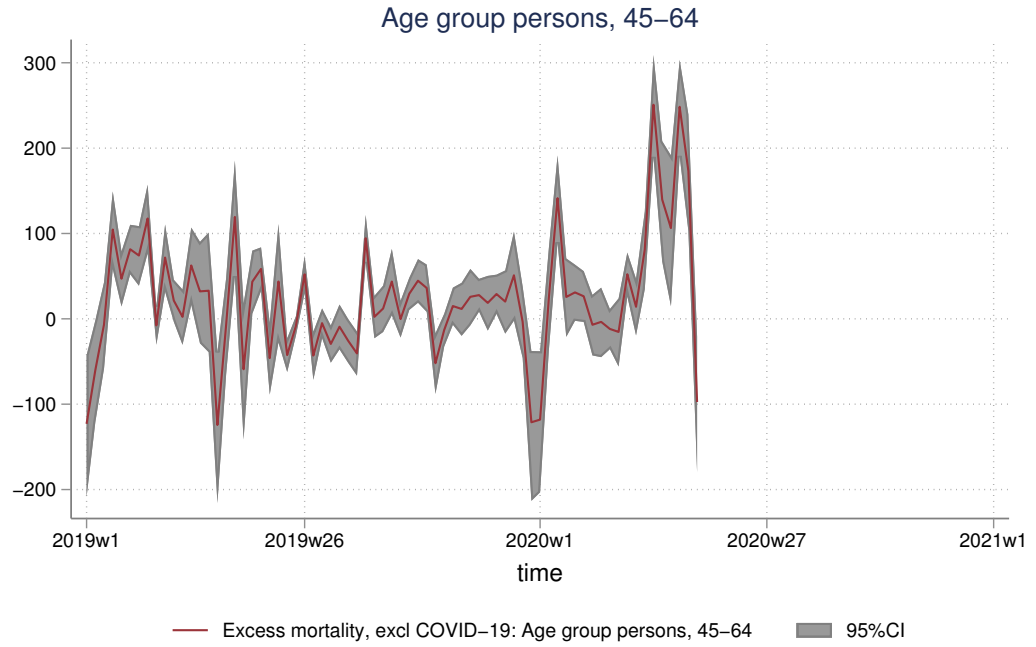

Figure 147: All 45-64 all-cause excess deaths (-COVID19), from 2020 week 1

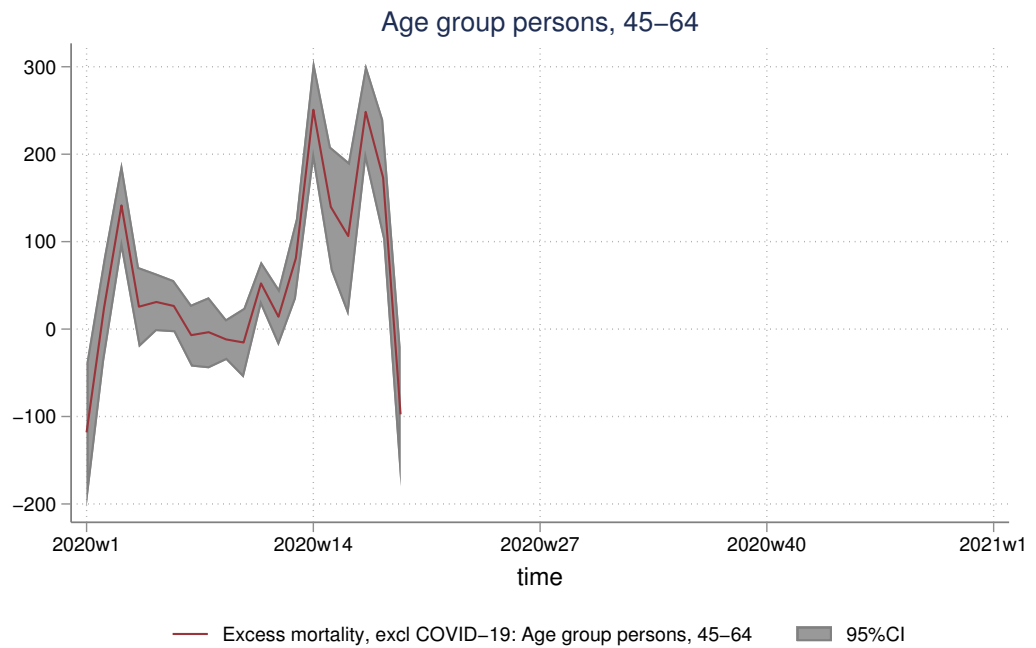

### 3.6 All aged 65-74

Figure 148: All 65-74 mortality time trend and model, from 2010 week 1

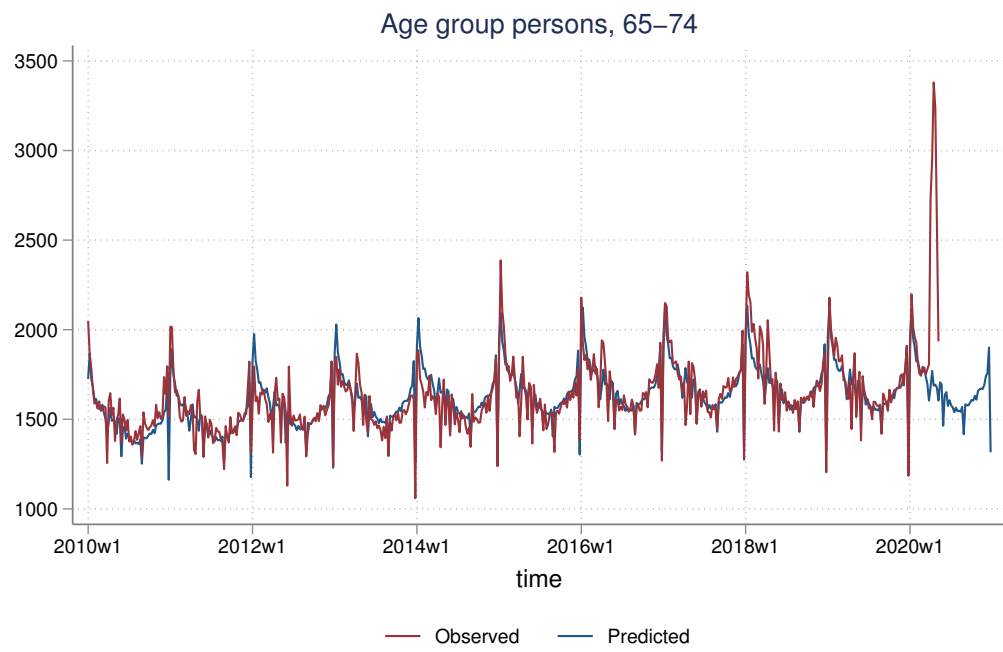

Figure 149: All 65-74 mortality time trend and model, from 2019 week 1

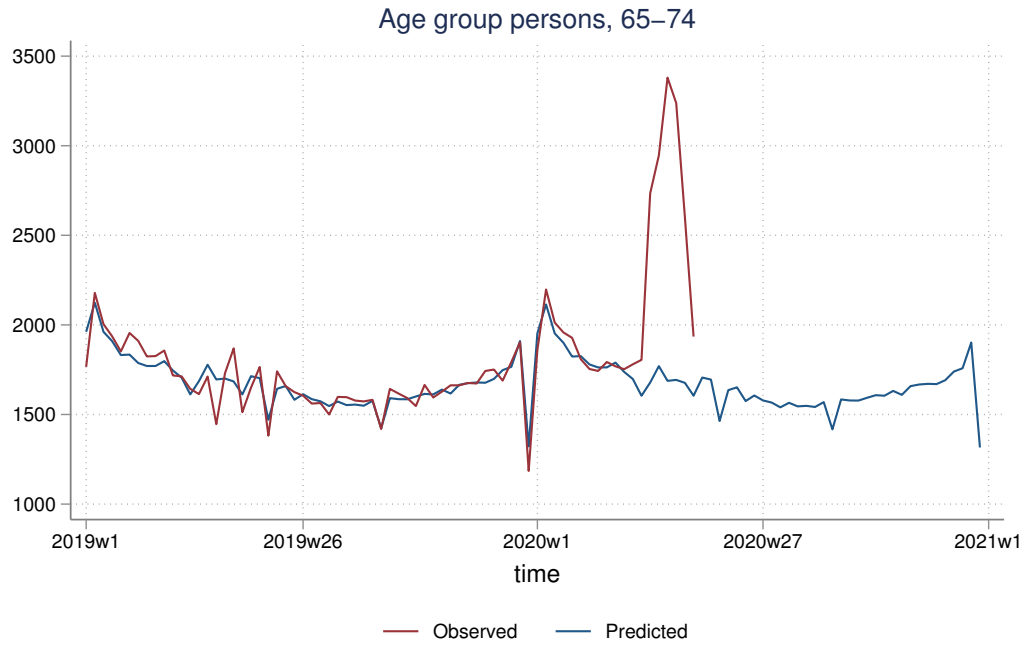

Figure 150: All 65-74 mortality time trend and model, from 2020 week 1

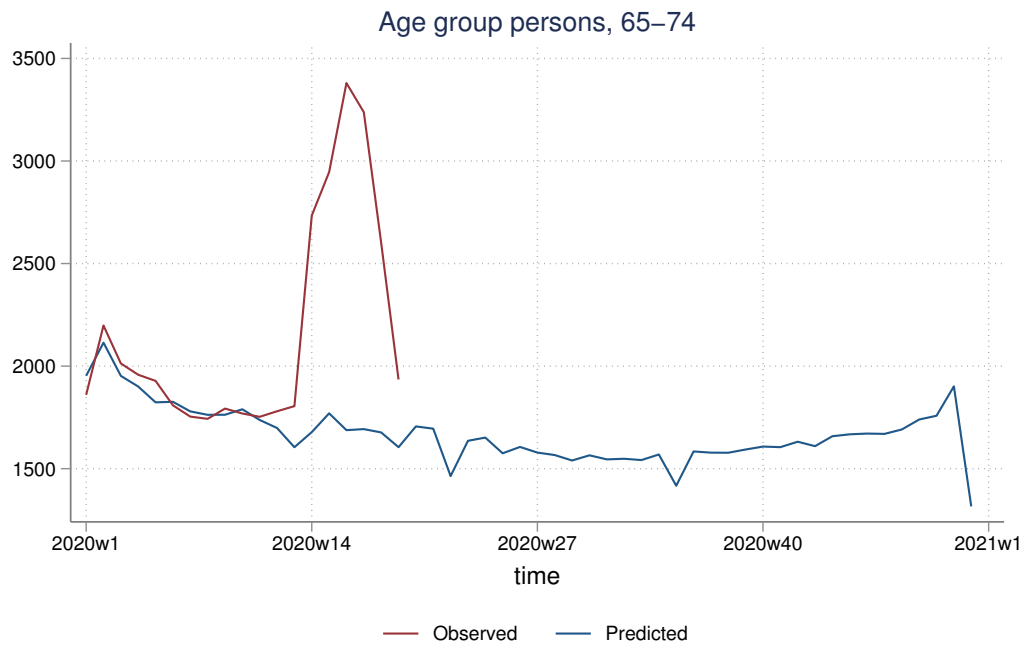

Figure 151: All 65-74 all-cause excess deaths, from 2010 week 1

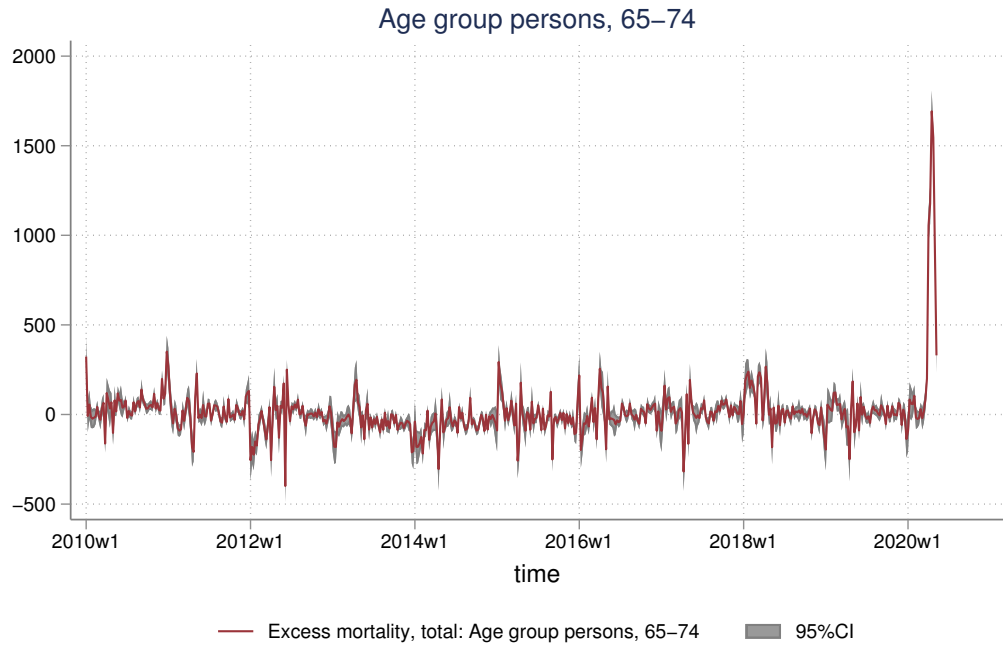

Figure 152: All 65-74 all-cause excess deaths, from 2019 week 1

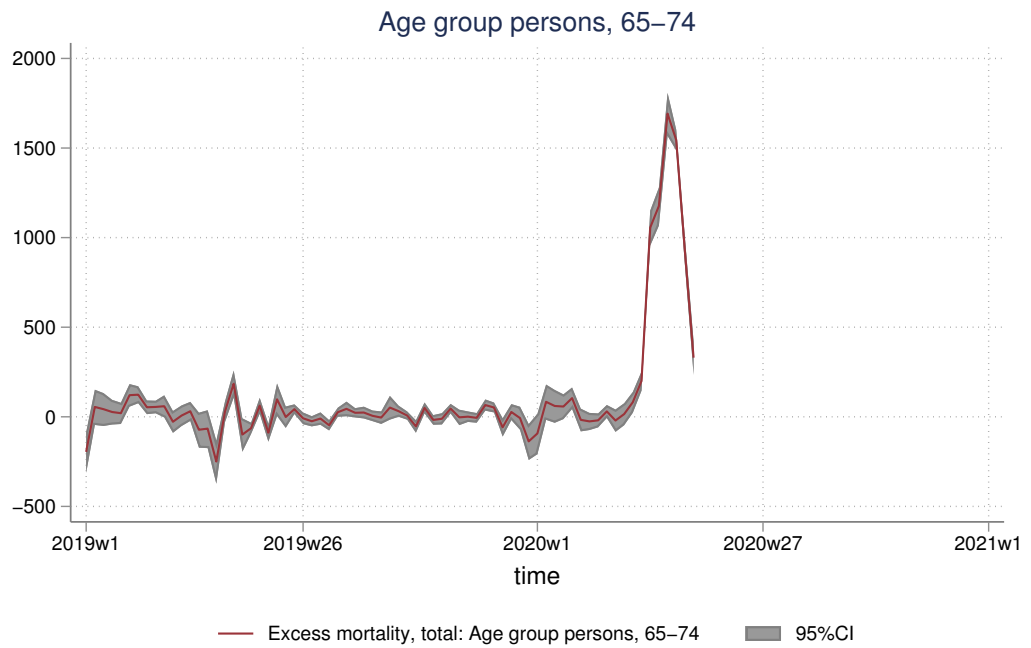

Figure 153: All 65-74 all-cause excess deaths, from 2020 week 1

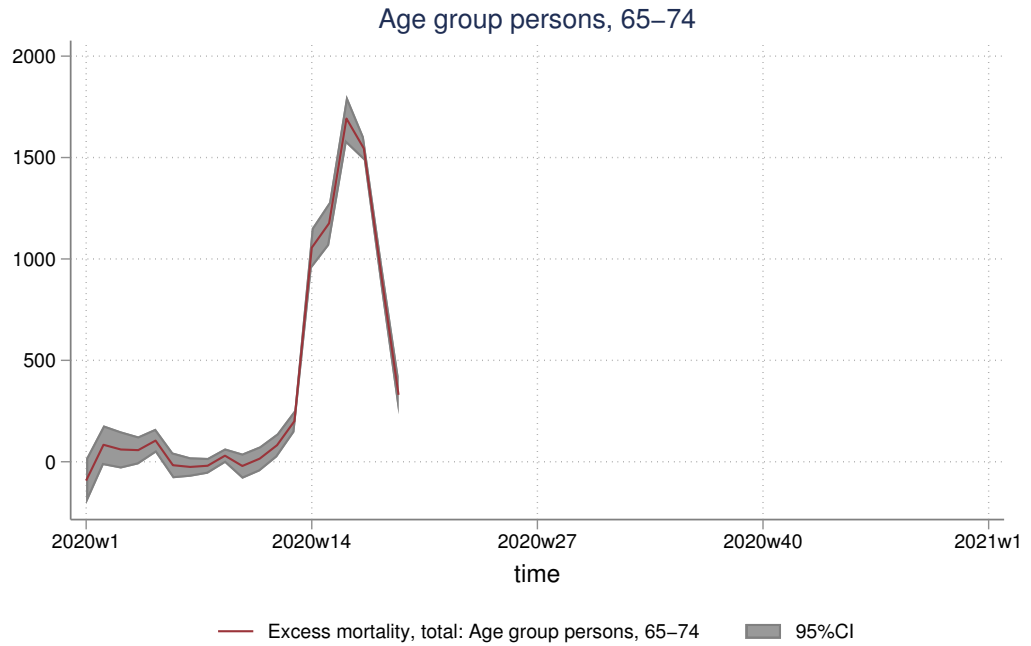

Figure 154: All 65-74 all-cause excess deaths (-COVID19), from 2010 week 1

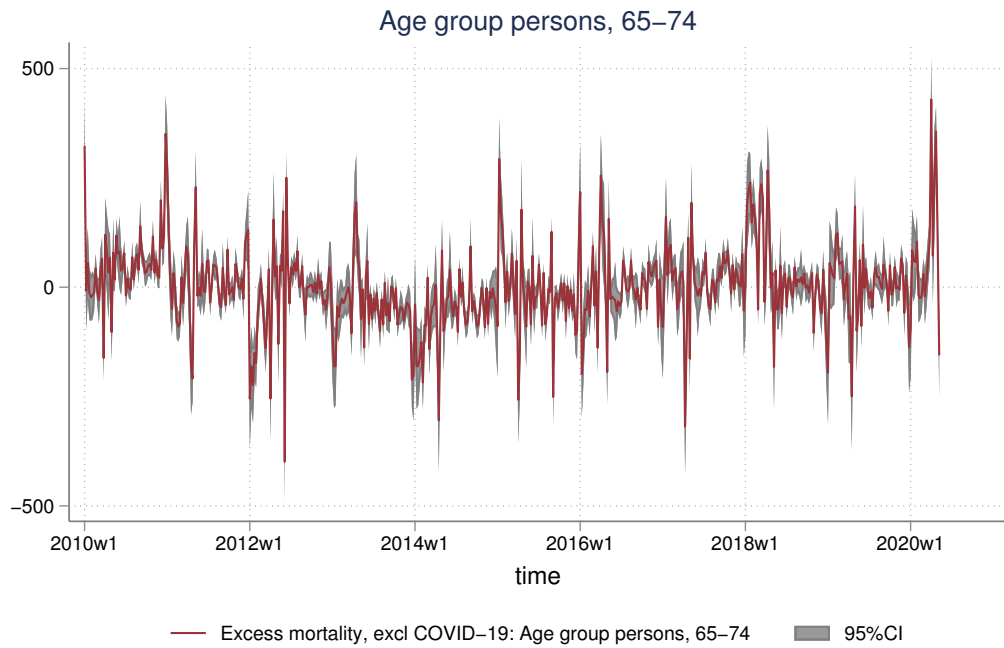

Figure 155: All 65-74 all-cause excess deaths (-COVID19), from 2019 week 1

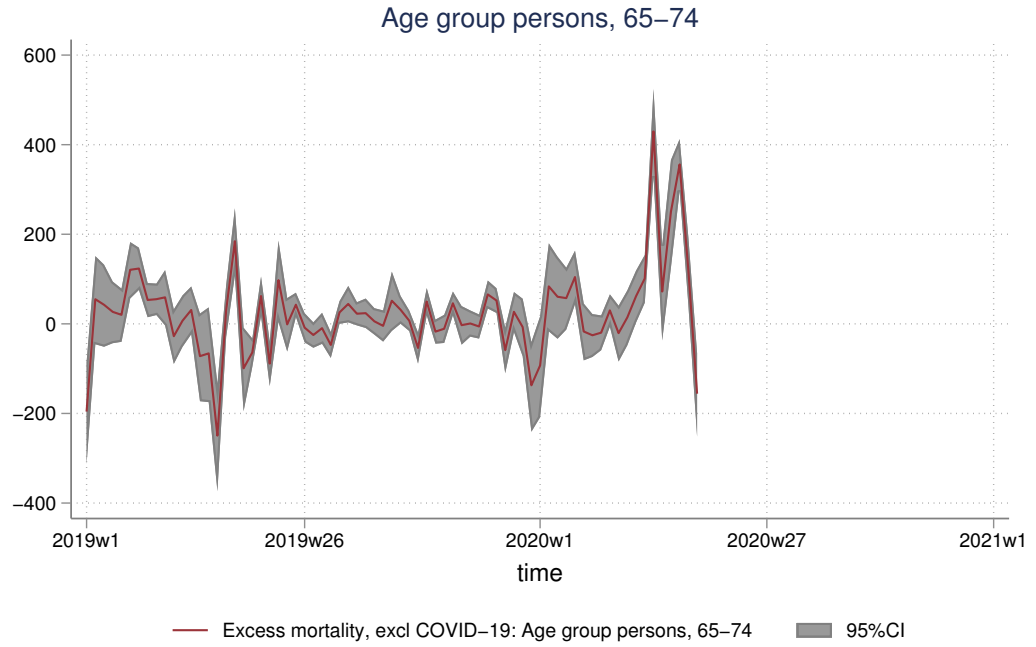

Figure 156: All 65-74 all-cause excess deaths (-COVID19), from 2020 week 1

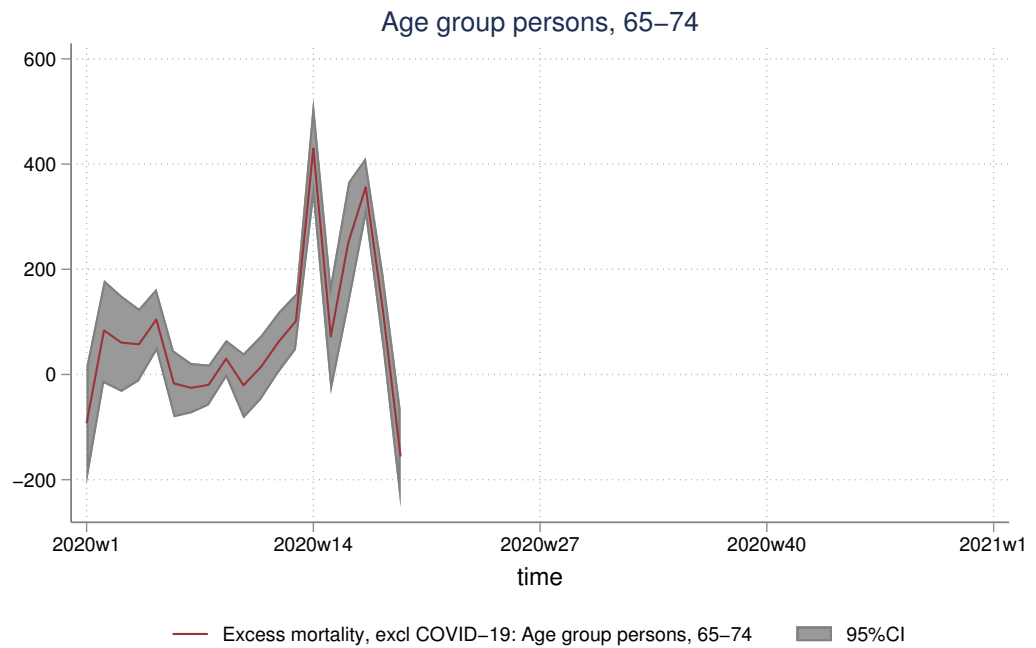



### 3.7 All aged 75-84

Figure 157: All 75-84 mortality time trend and model, from 2010 week 1

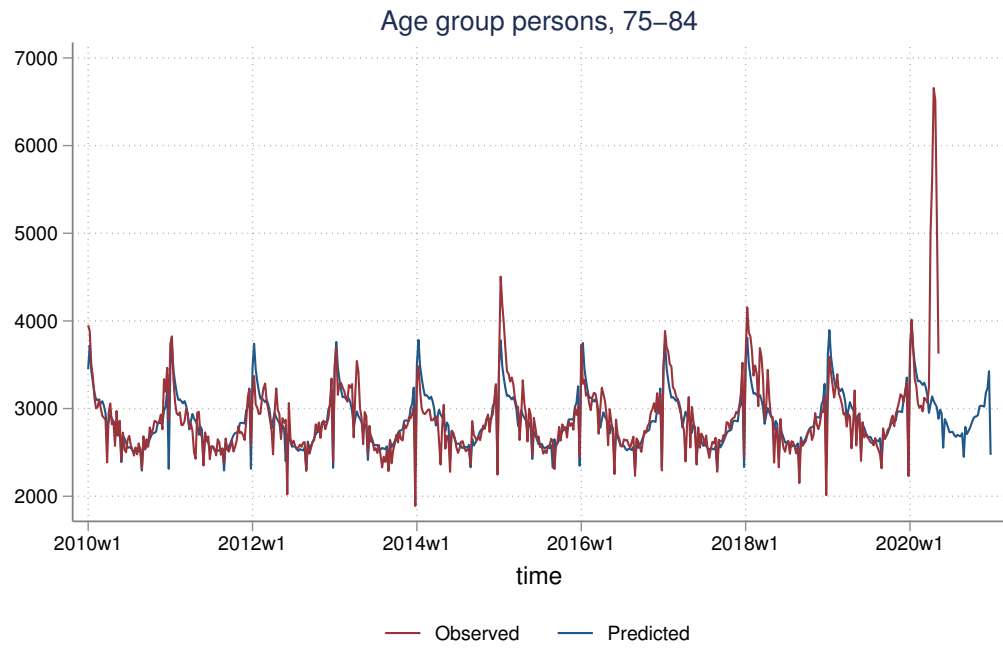

Figure 158: All 75-84 mortality time trend and model, from 2019 week 1

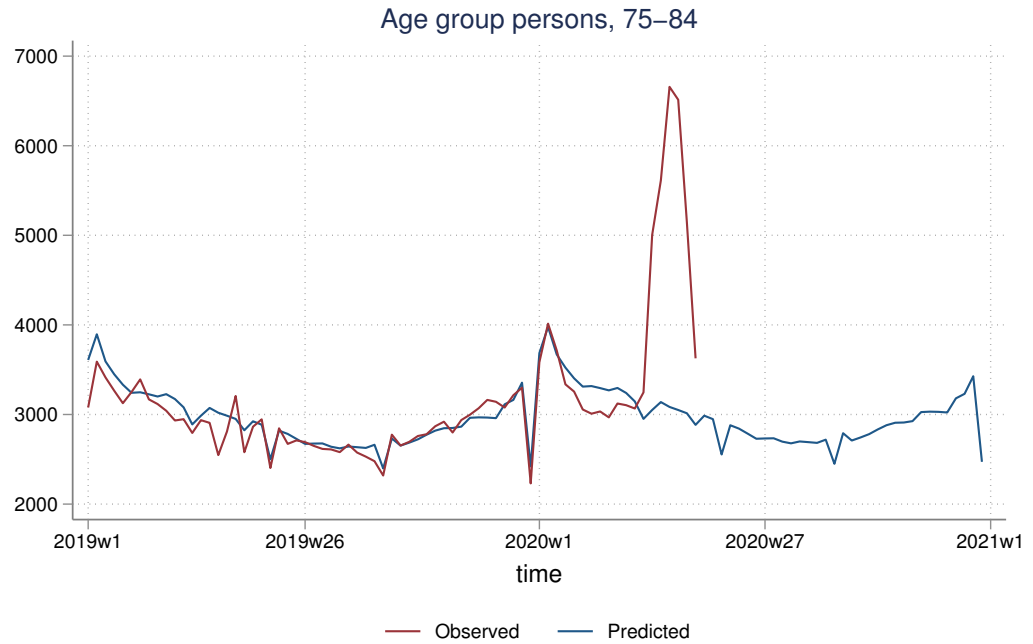

Figure 159: All 75-84 mortality time trend and model, from 2020 week 1

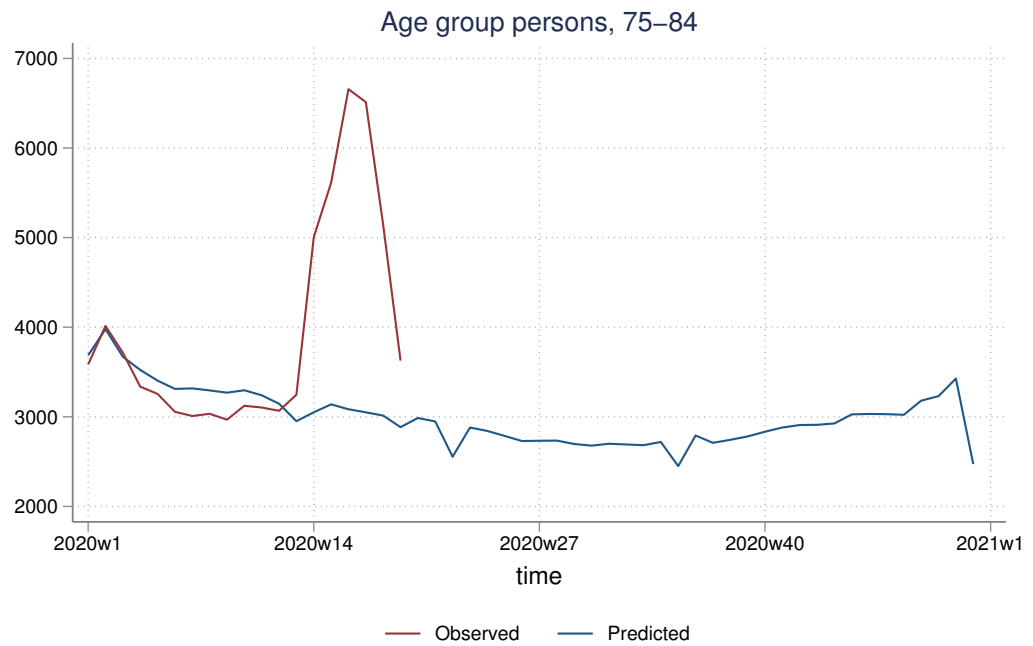

Figure 160: All 75-84 all-cause excess deaths, from 2010 week 1

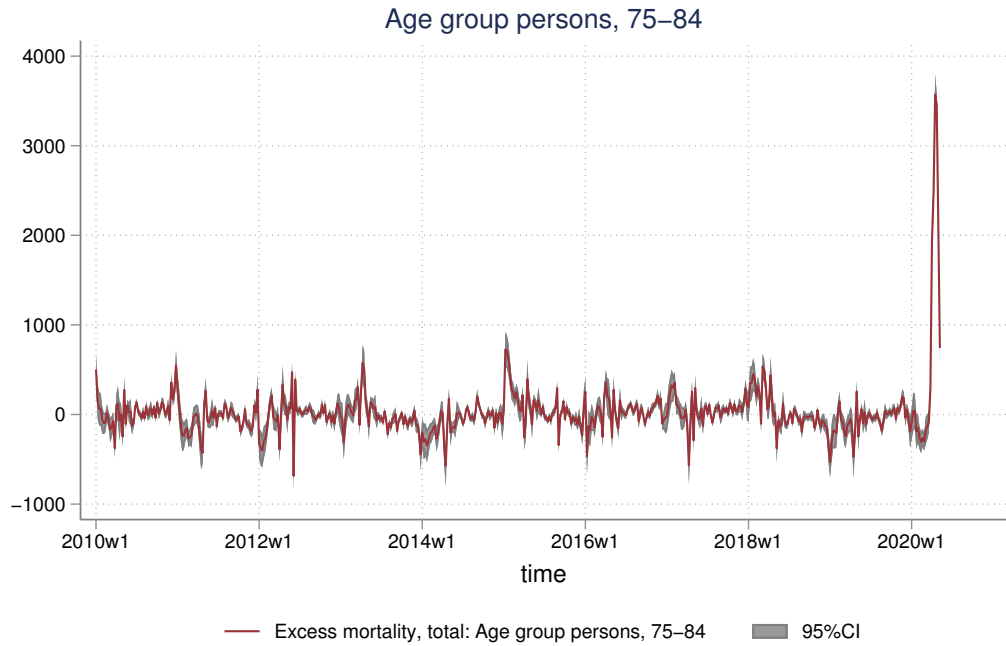

Figure 161: All 75-84 all-cause excess deaths, from 2019 week 1

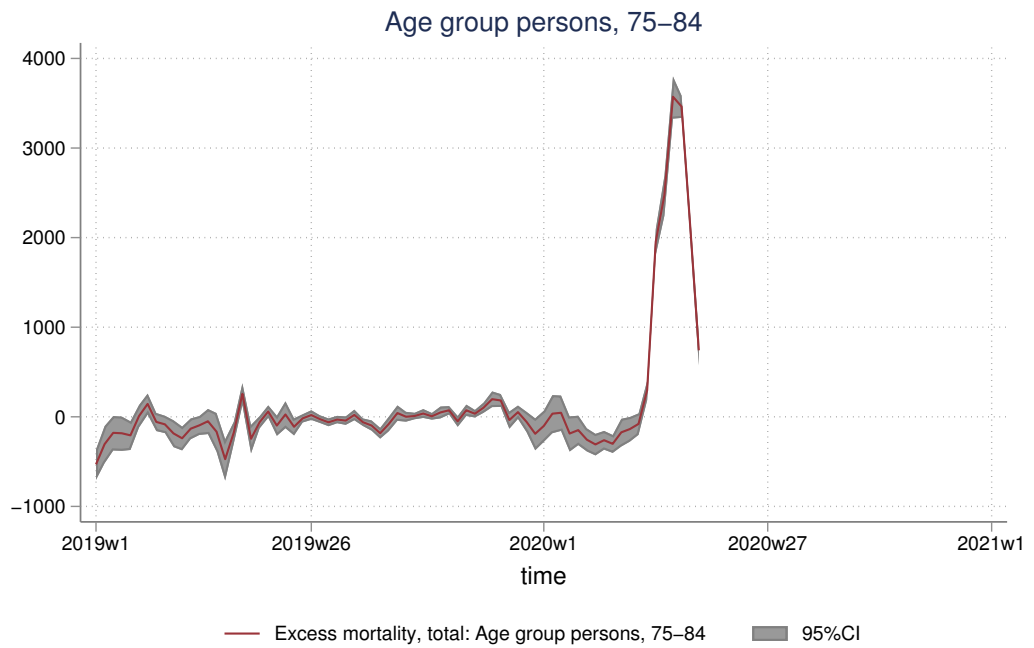

Figure 162: All 75-84 all-cause excess deaths, from 2020 week 1

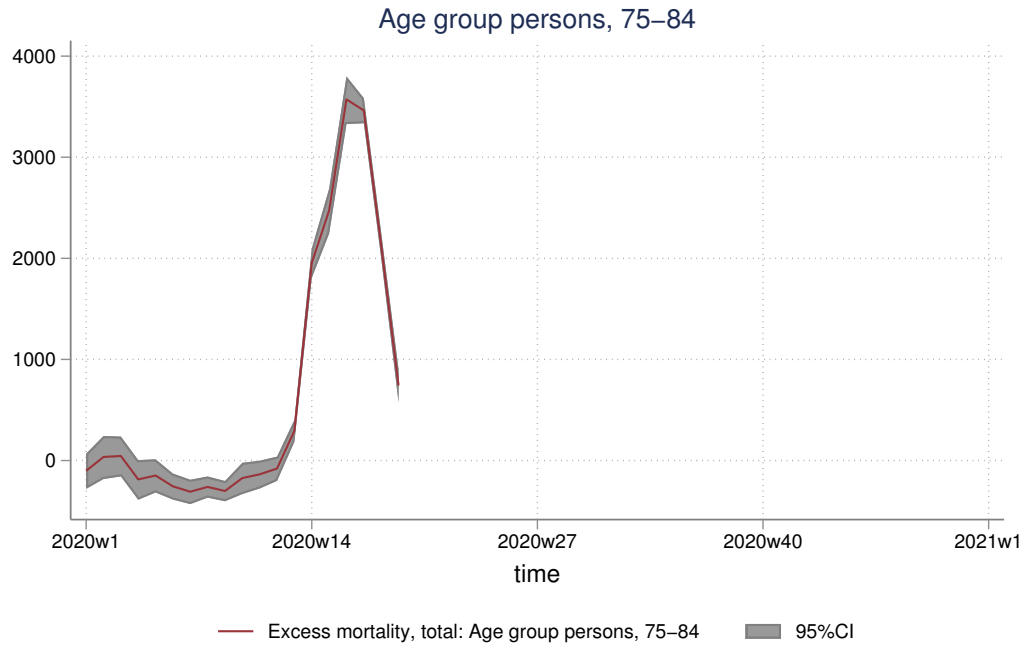

Figure 163: All 75-84 all-cause excess deaths (–COVID19), from 2010 week 1

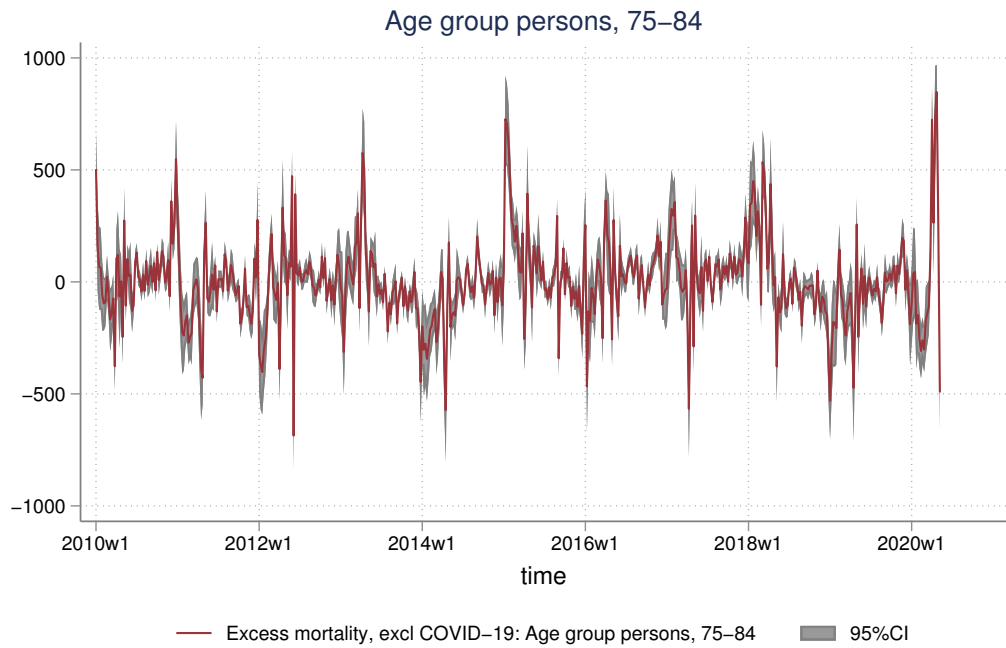

Figure 164: All 75-84 all-cause excess deaths (-COVID19), from 2019 week 1

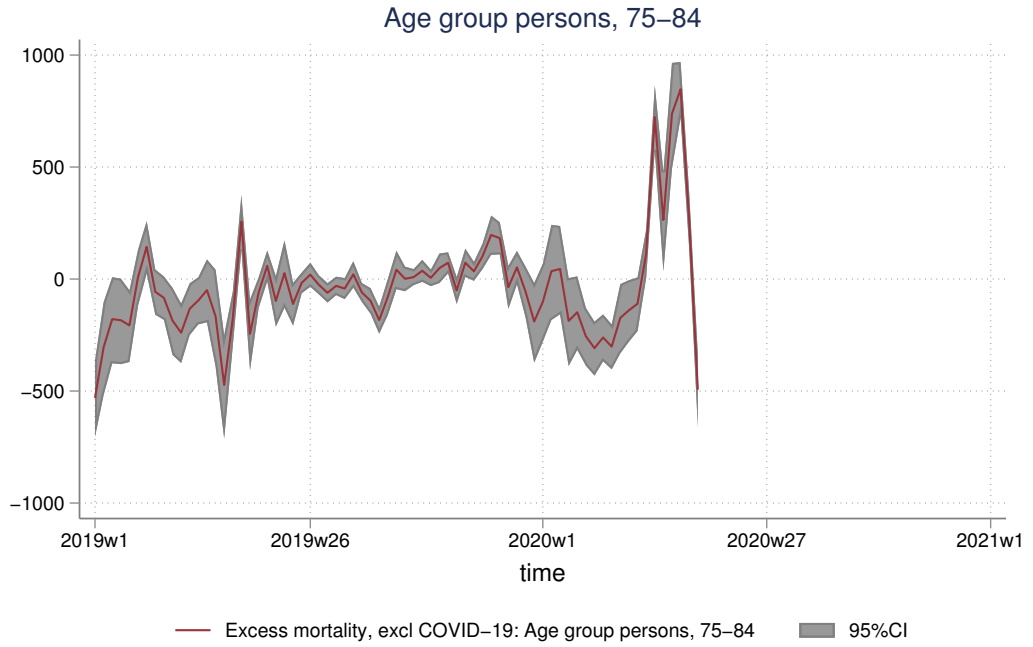

Figure 165: All 75-84 all-cause excess deaths (-COVID19), from 2020 week 1

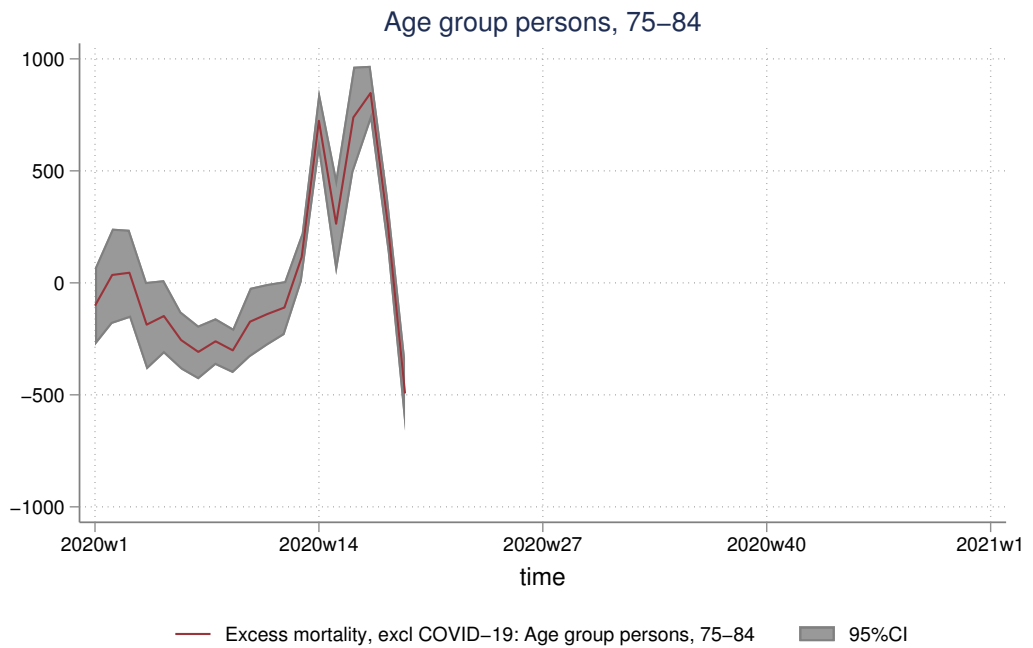

### 3.8 All aged 85+

Figure 166: All 85+ mortality time trend and model, from 2010 week 1

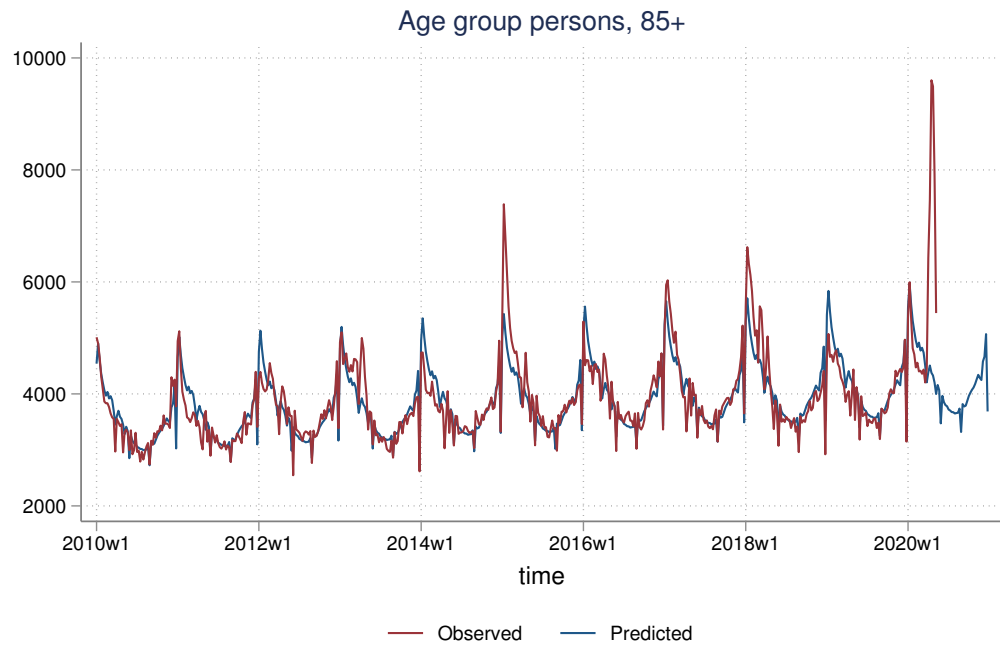

Figure 167: All 85+ mortality time trend and model, from 2019 week 1

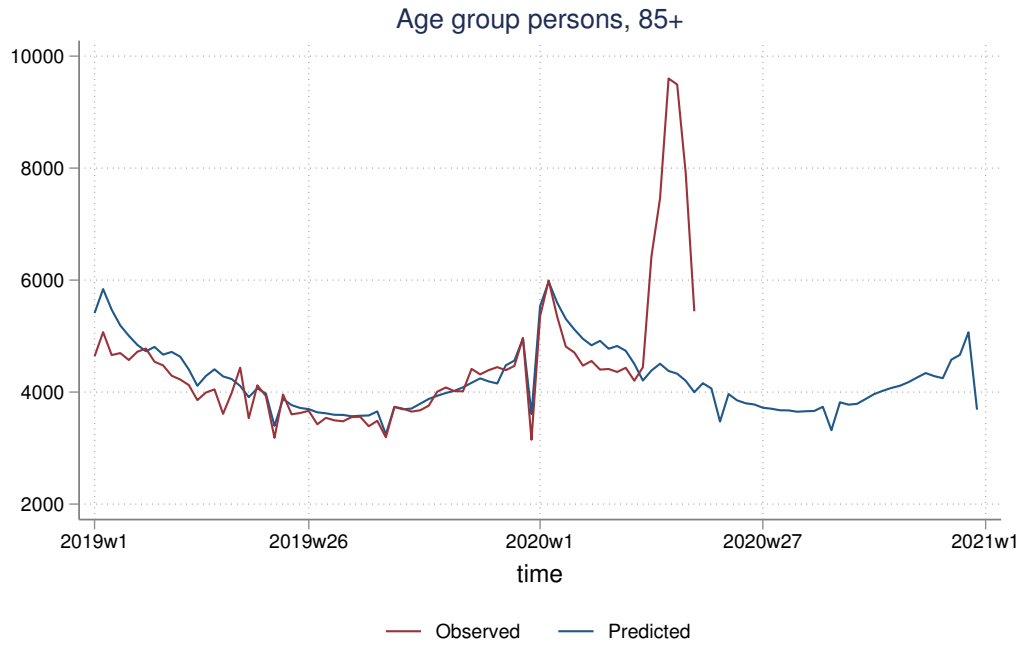

Figure 168: All 85+ mortality time trend and model, from 2020 week 1

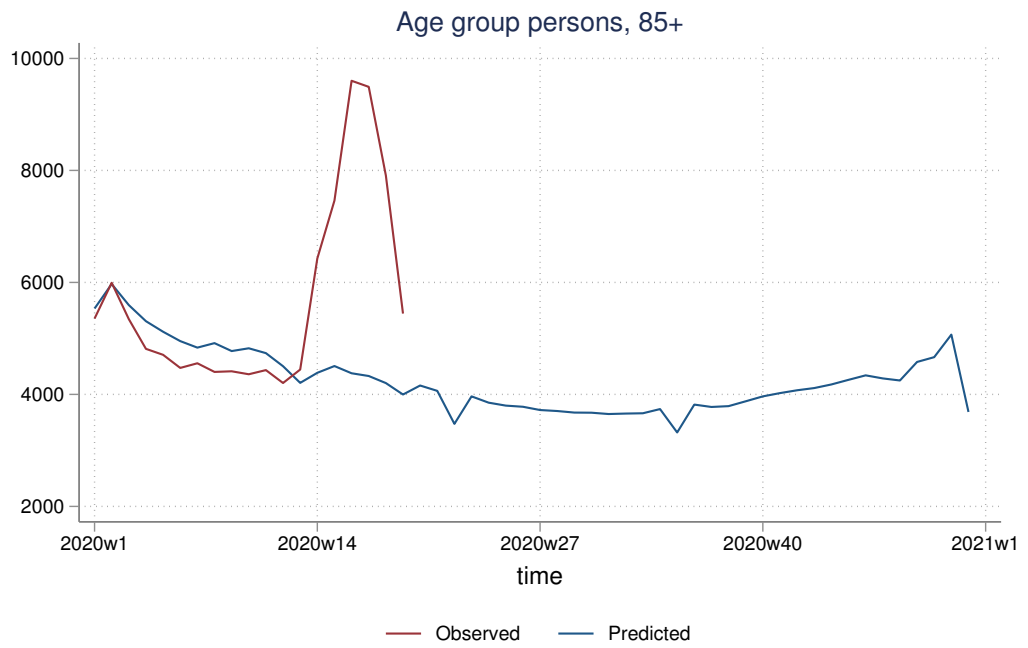

Figure 169: All 85+ all-cause excess deaths, from 2010 week 1

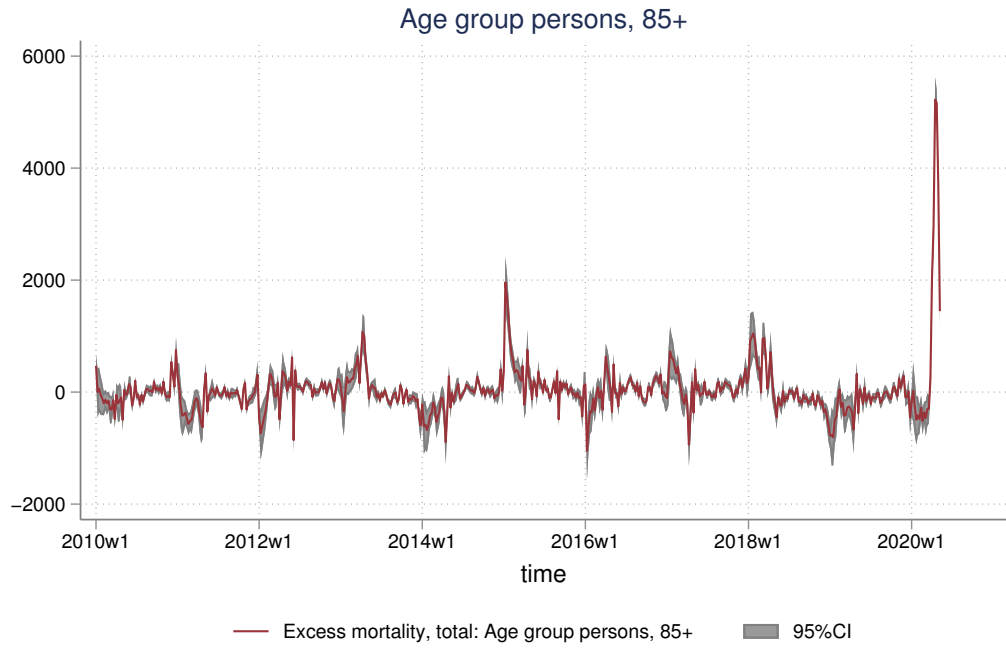

Figure 170: All 85+ all-cause excess deaths, from 2019 week 1

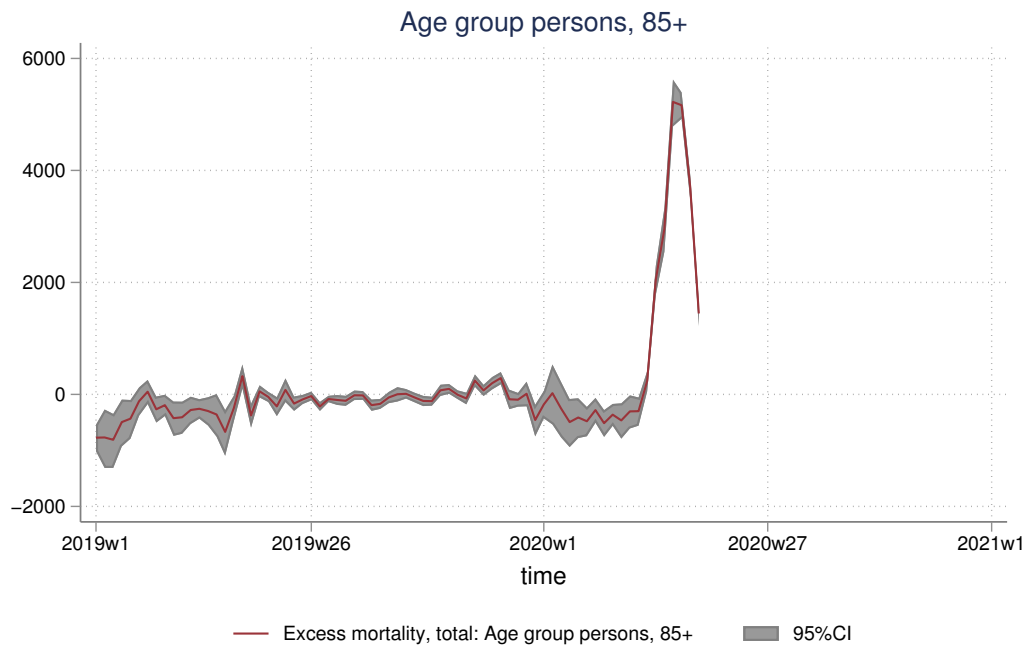



Figure 171: All 85+ all-cause excess deaths, from 2020 week 1

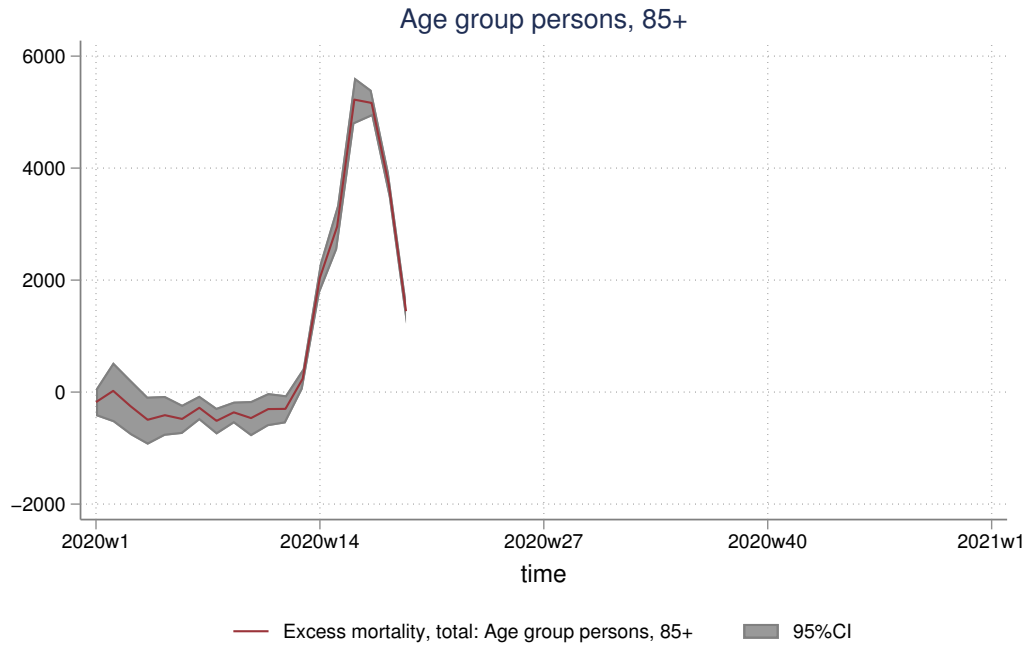

Figure 172: All 85+ all-cause excess deaths (-COVID19), from 2010 week 1

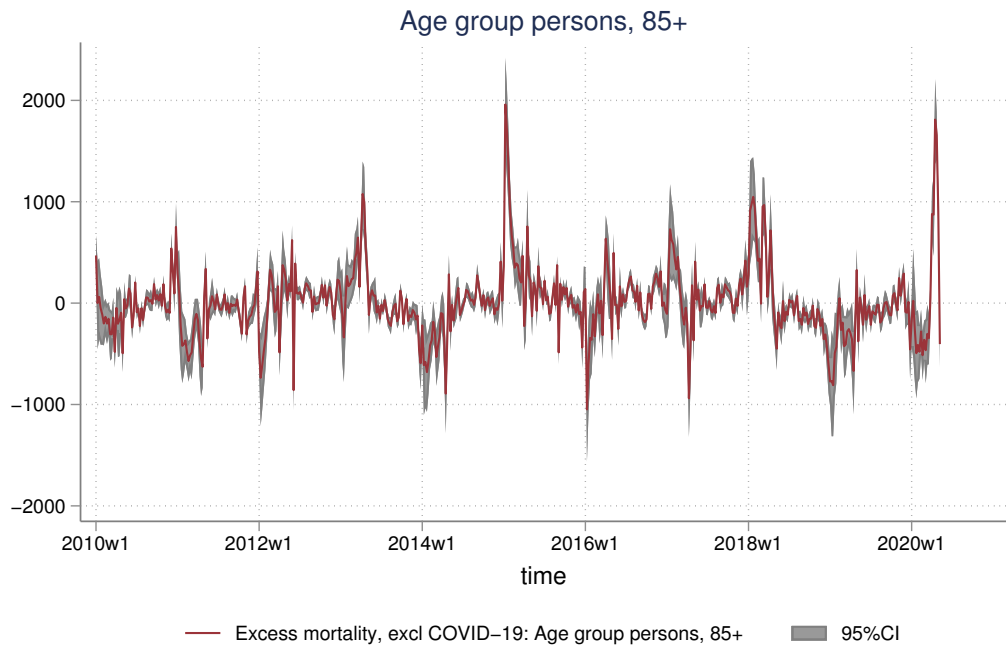

Figure 173: All 85+ all-cause excess deaths (-COVID19), from 2019 week 1

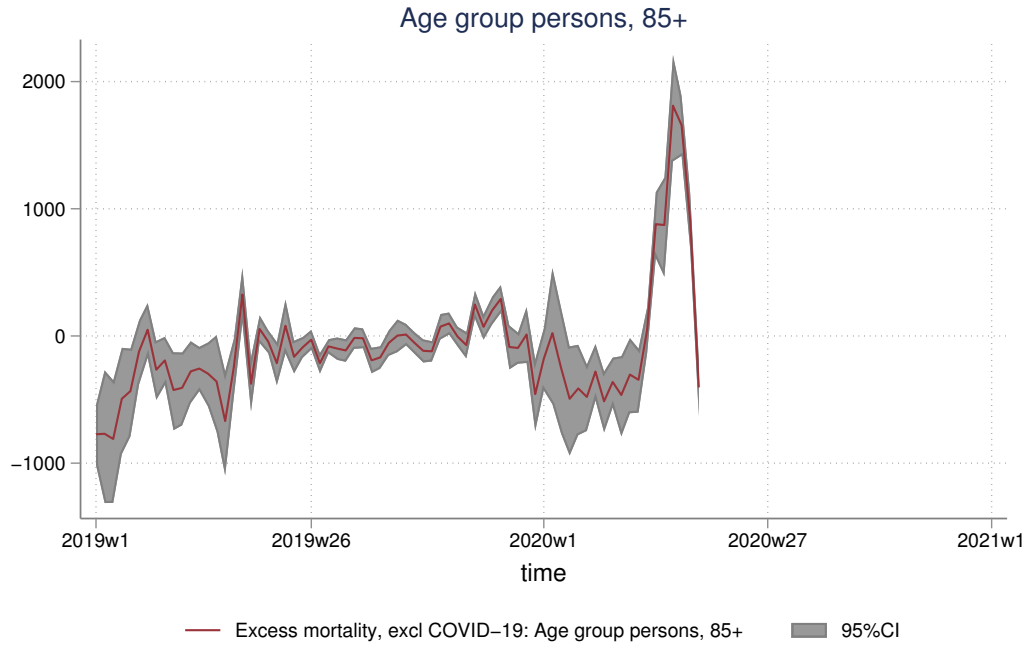

Figure 174: All 85+ all-cause excess deaths (-COVID19), from 2020 week 1

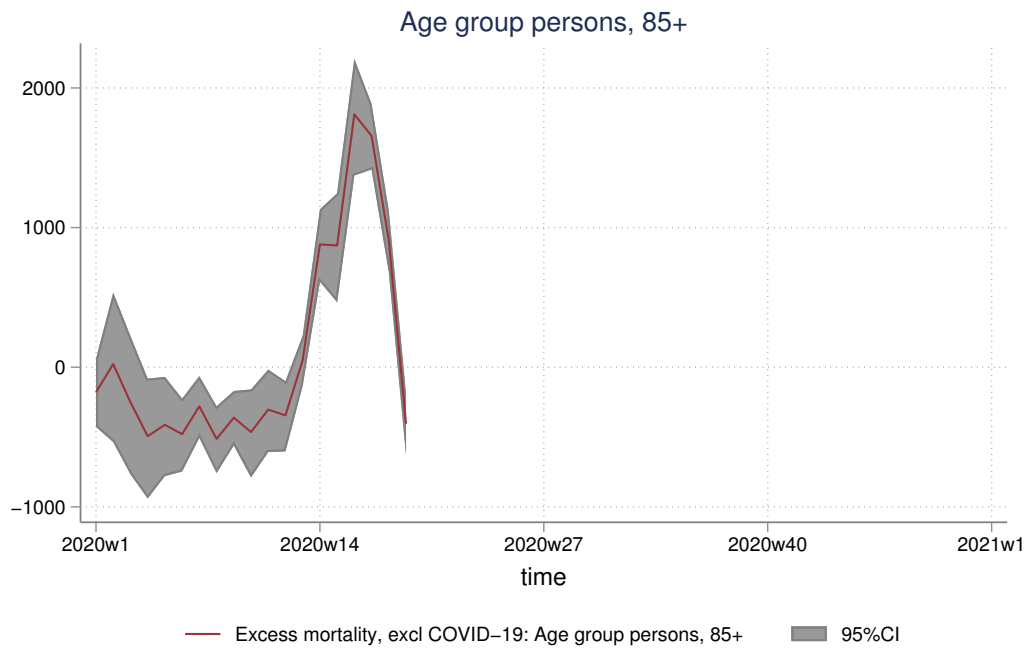

## 4 Age groups, males

### 4.1 Time trends

Figure 175: Male age group mortality time trends, from 2010 wk1

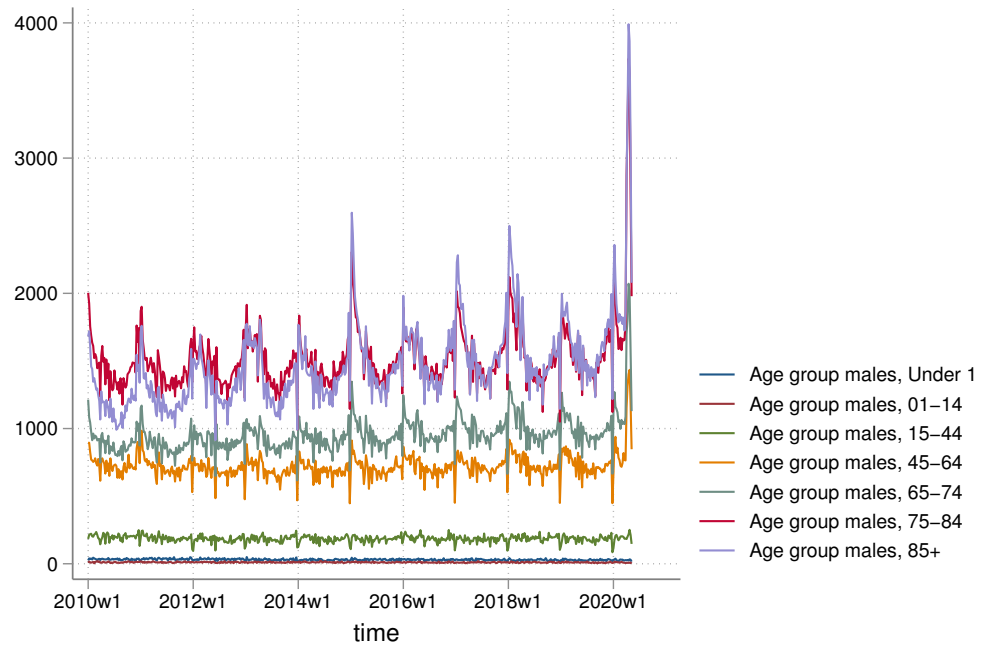

Figure 176: Male age group mortality time trends, from 2019 wk1

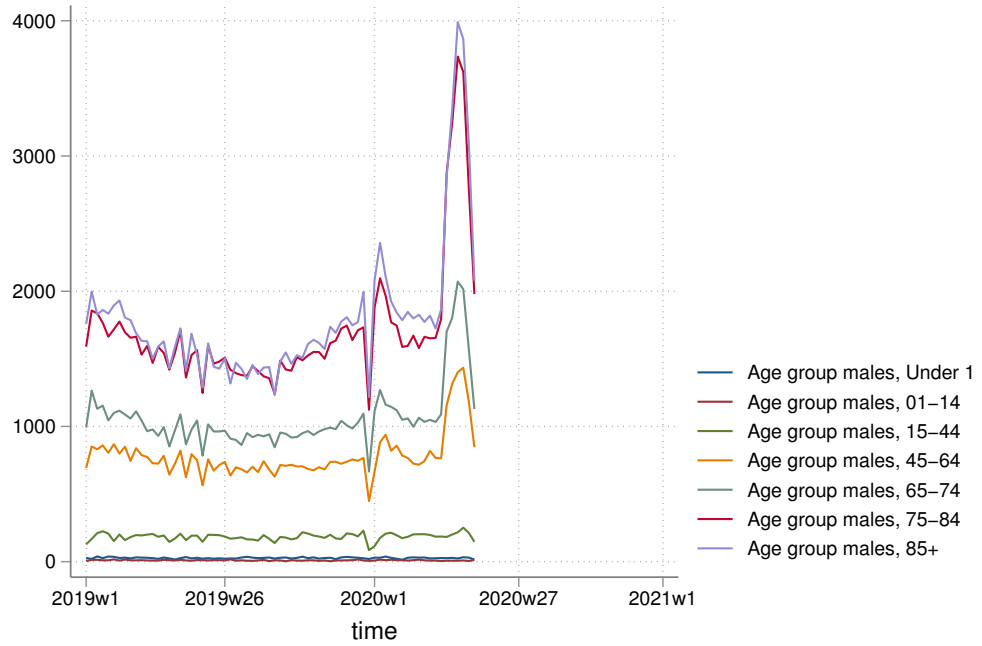

Figure 177: Male age group mortality time trends, from 2020 wk1

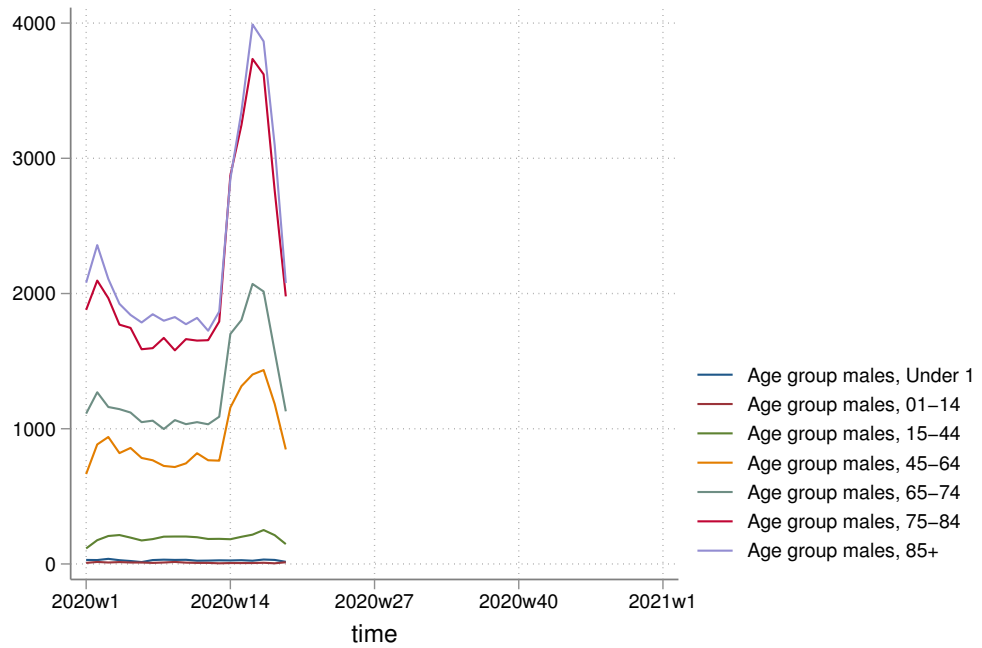

## 4.2 Males aged under 1

Figure 178: Males < 1 mortality time trend and model, from 2010 wk1

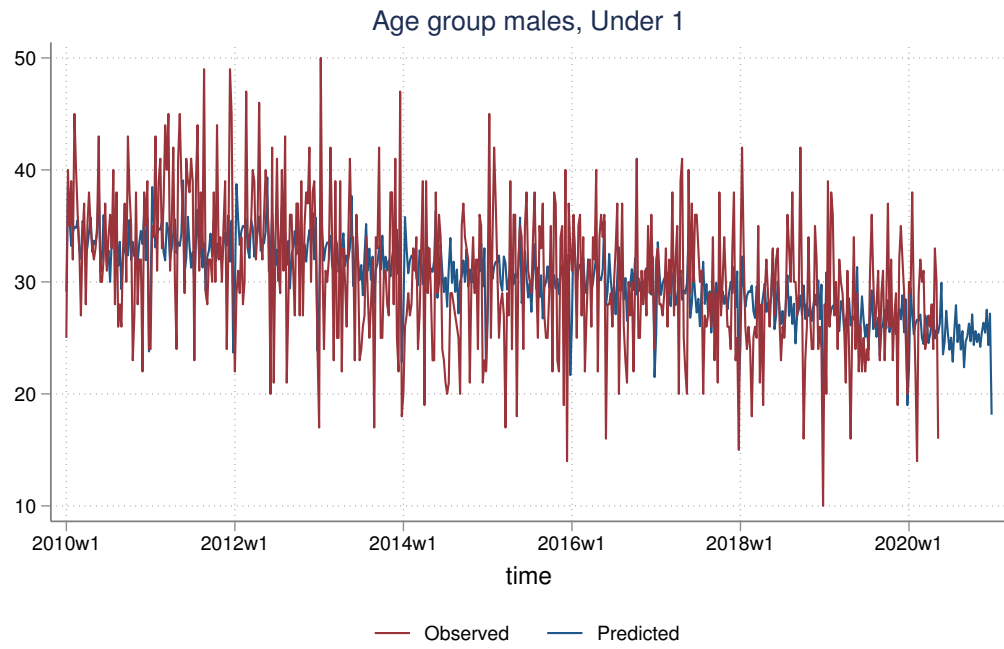

Figure 179: Males < 1 mortality time trend and model, from 2019 wk1

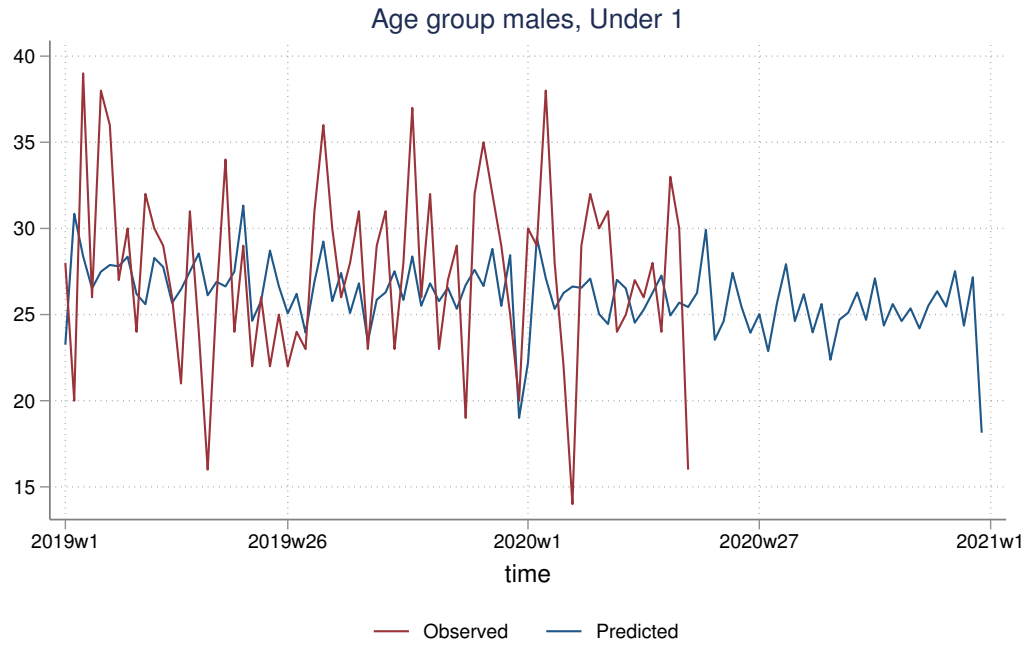

Figure 180: Males < 1 mortality time trend and model, from 2020 wk1

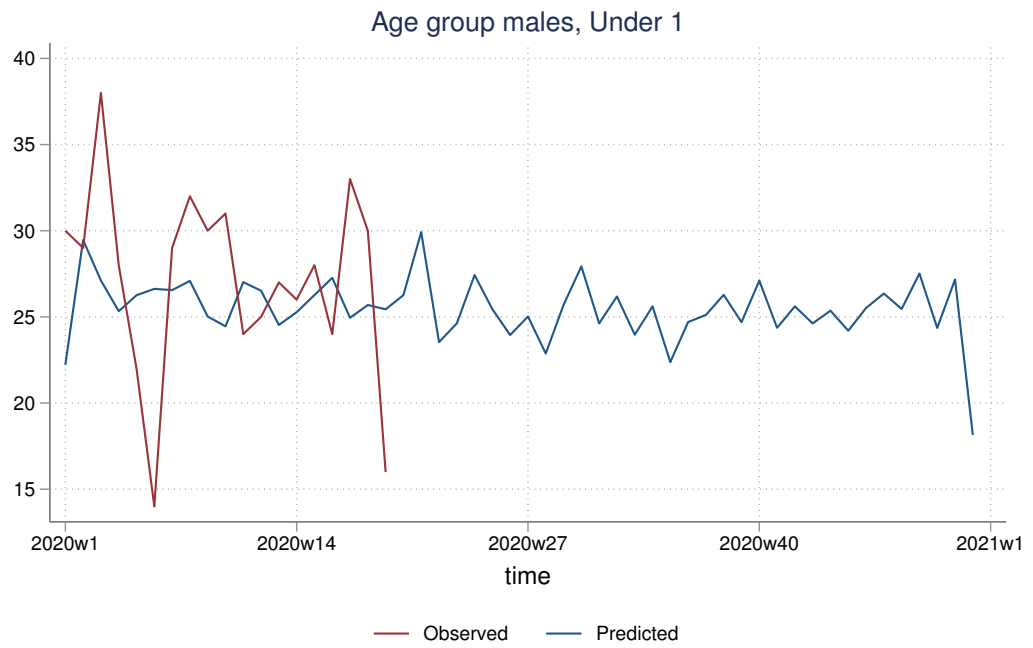

Figure 181: Males < 1 all-cause excess deaths, from 2010 wk1

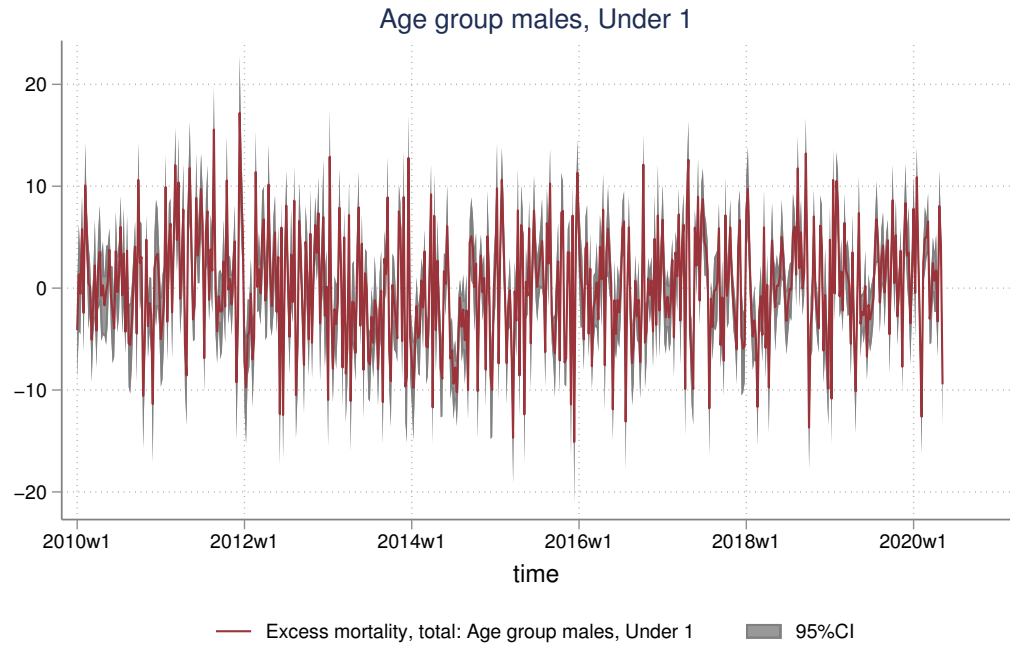

Figure 182: Males < 1 all-cause excess deaths, from 2019 wk1

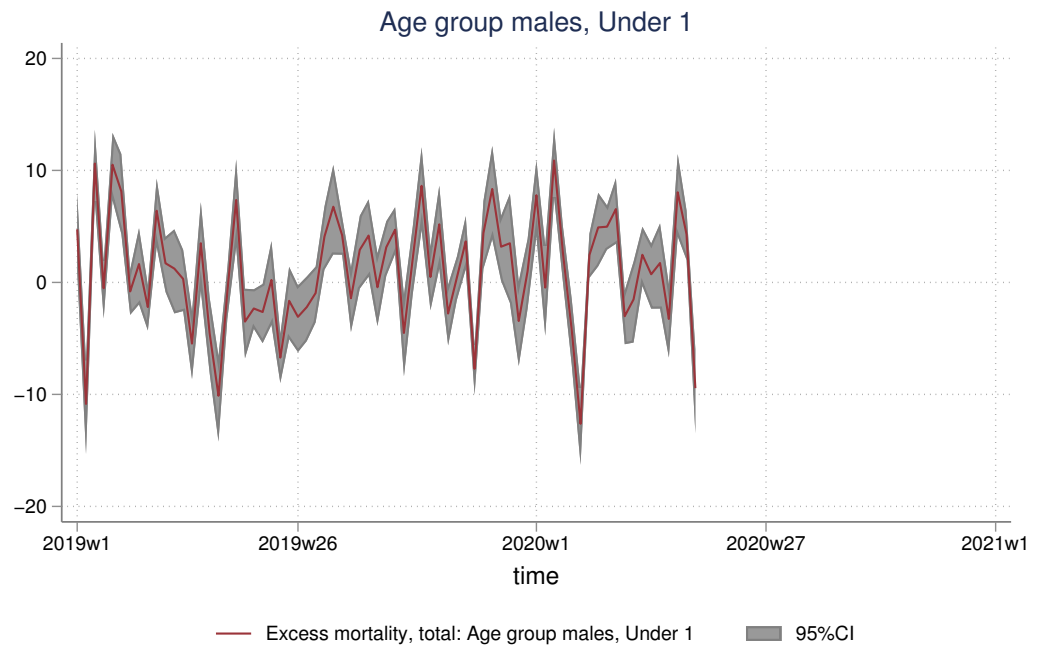

Figure 183: Males < 1 all-cause excess deaths, from 2020 wk1

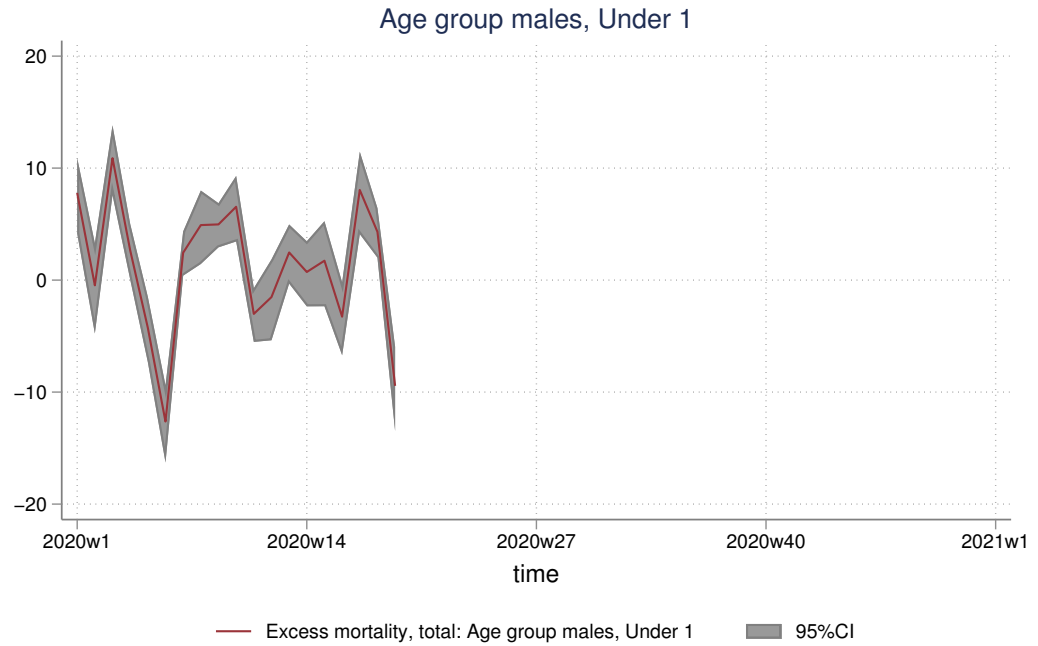

Figure 184: Males < 1 all-cause excess deaths minus COVID19, from 2010 wk1

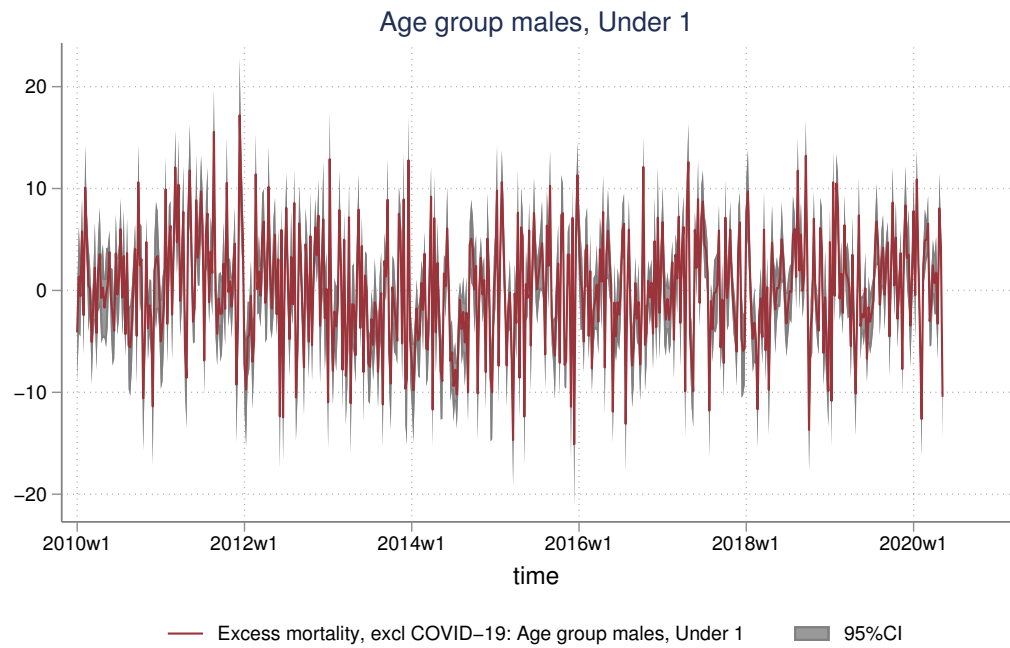



Figure 185: Males < 1 all-cause excess deaths minus COVID19, from 2019 wk1

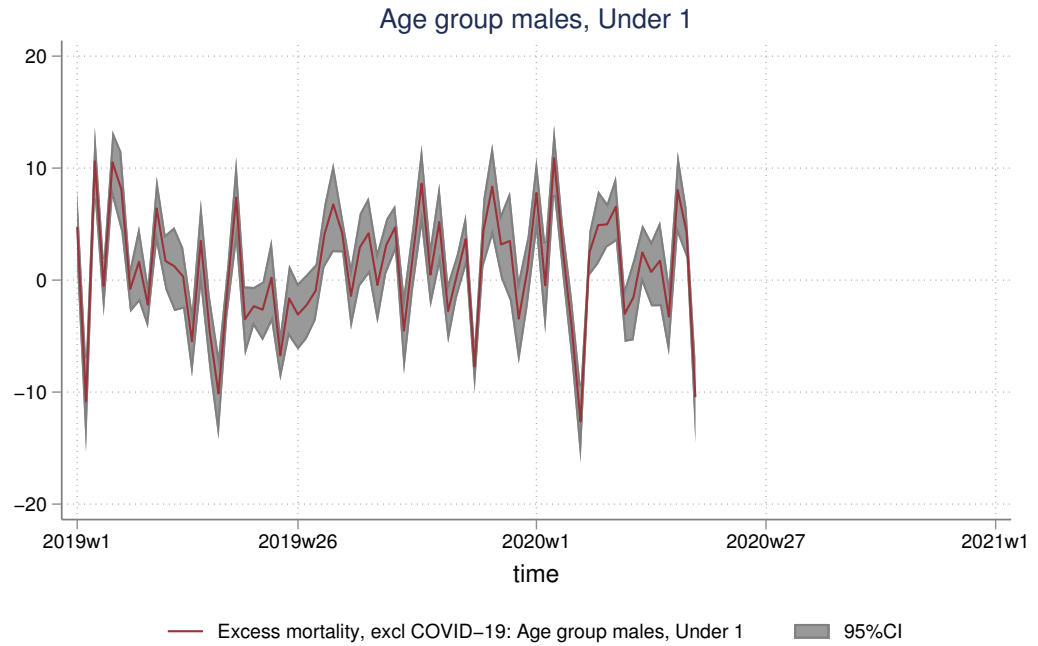

Figure 186: Males < 1 all-cause excess deaths minus COVID19, from 2020 wk1

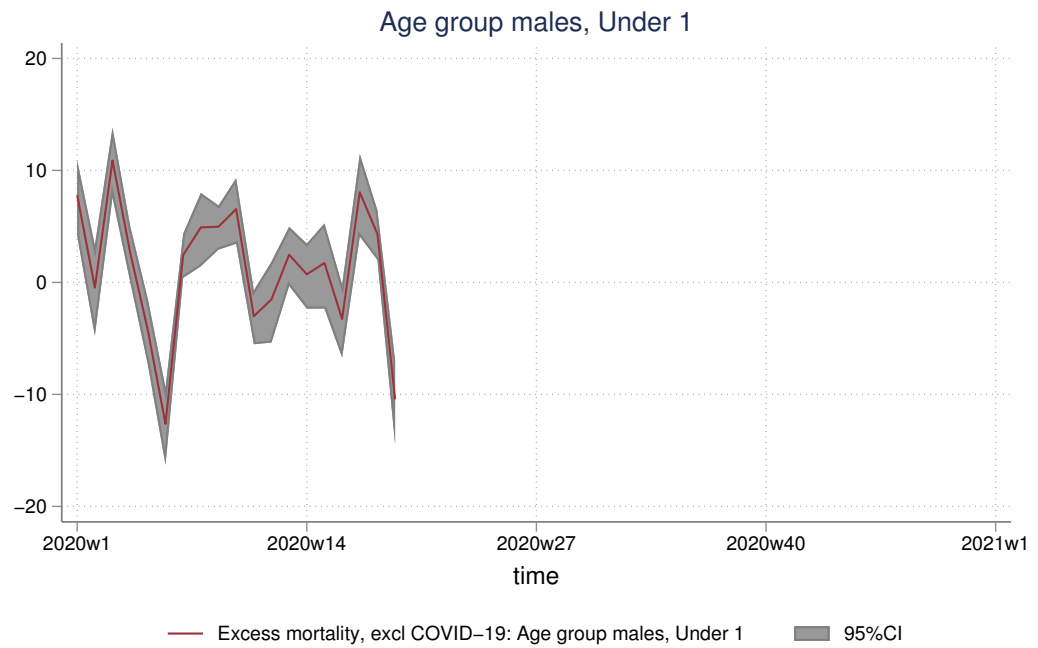

### 4.3 Males aged 01-14

Figure 187: Males 01-14 mortality time trend and model, from 2010 wk1

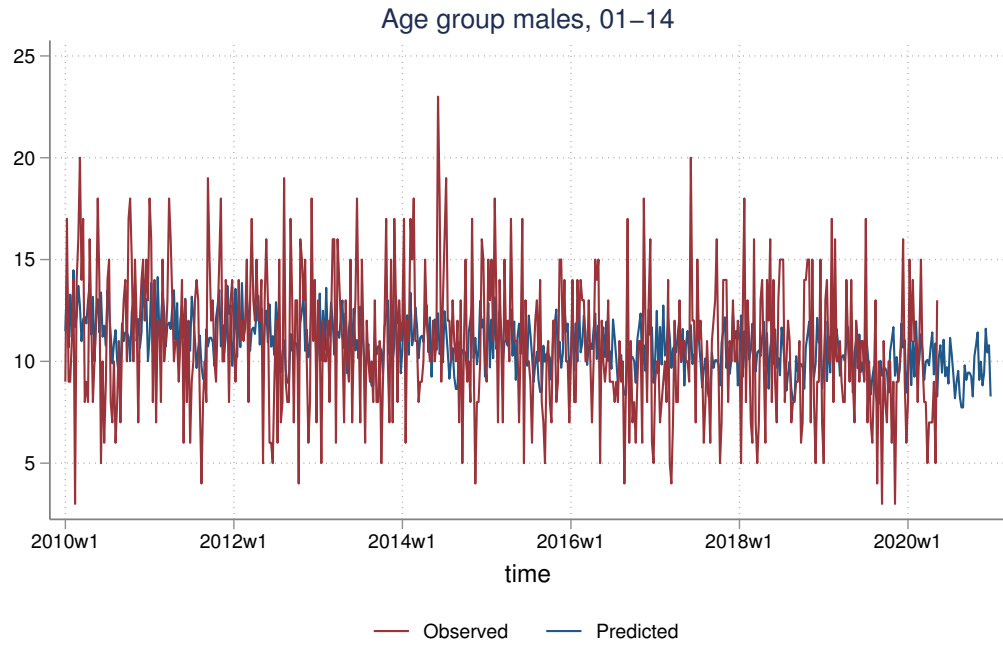

Figure 188: Males 01-14 mortality time trend and model, from 2019 wk1

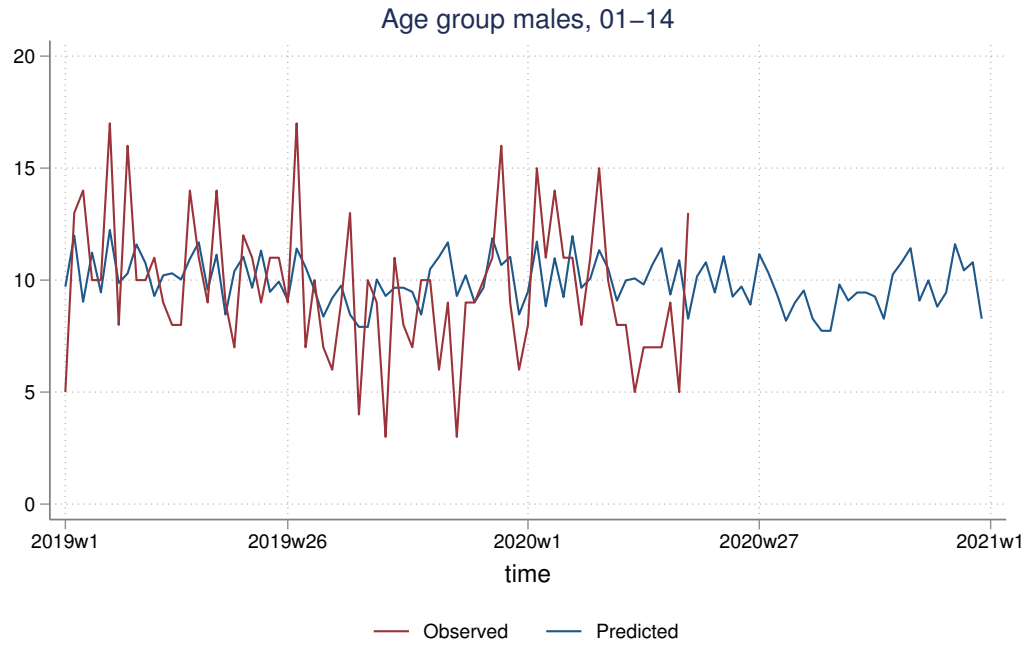

Figure 189: Males 01-14 mortality time trend and model, from 2020 wk1

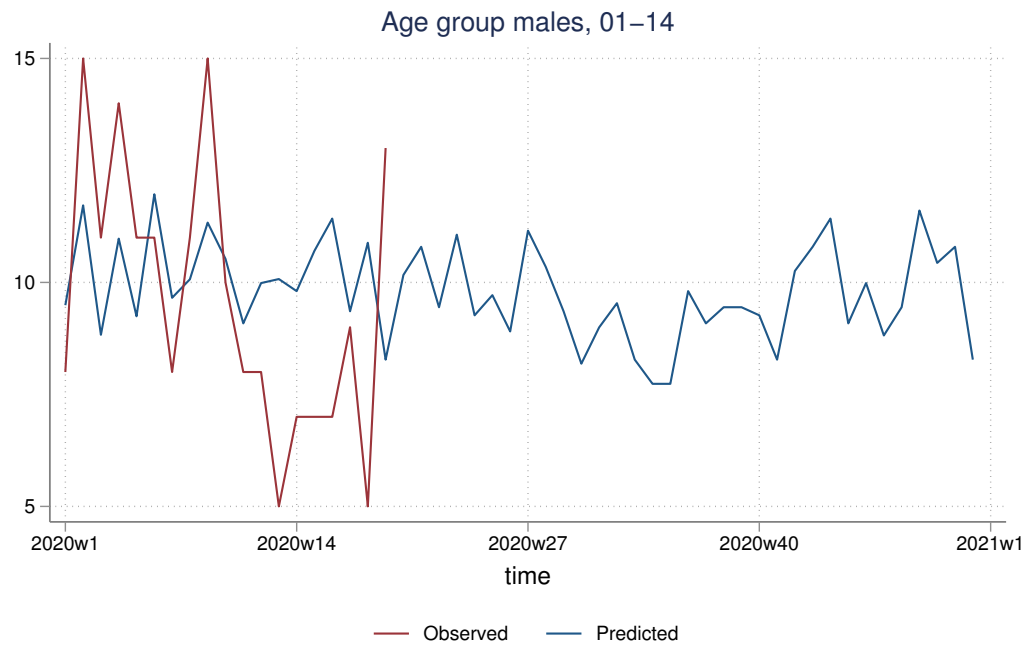

Figure 190: Males 01-14 all-cause excess deaths, from 2010 wk1

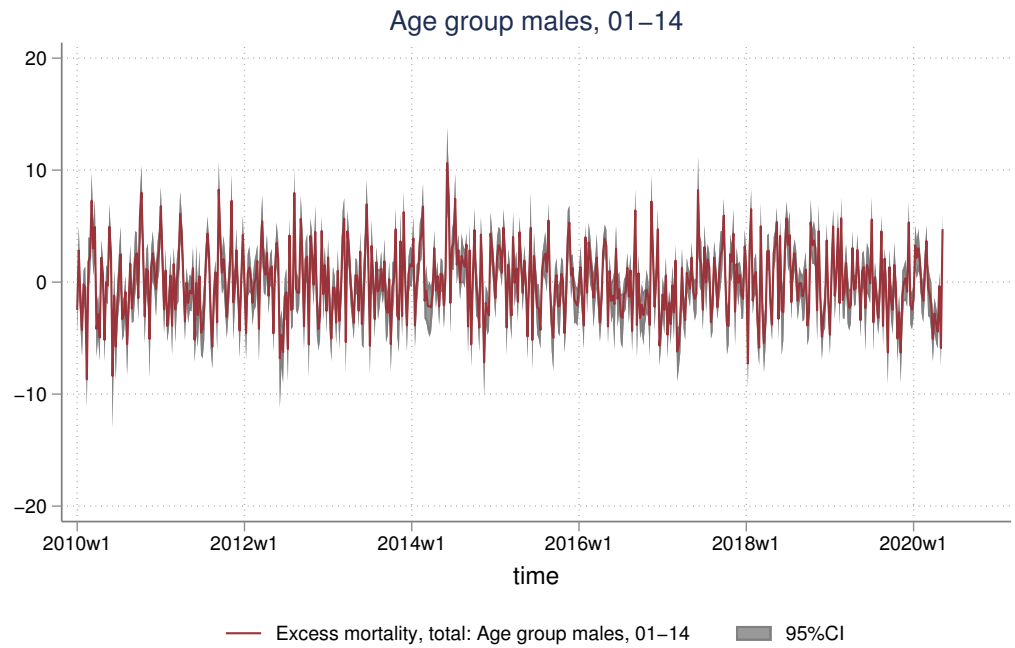

Figure 191: Males 01-14 all-cause excess deaths, from 2019 wk1

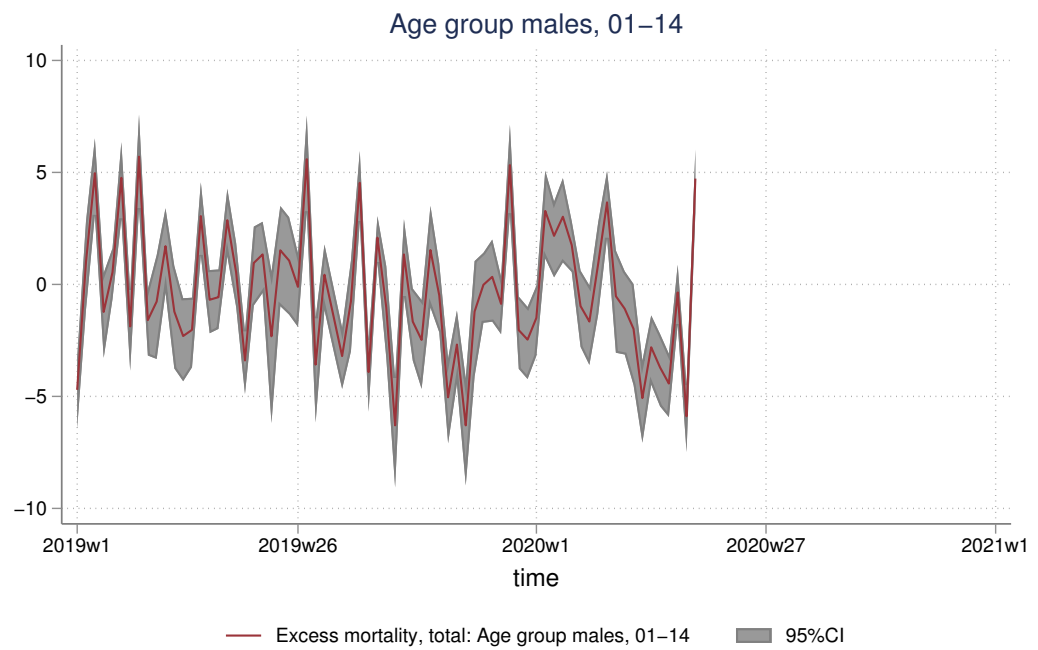

Figure 192: Males 01-14 all-cause excess deaths, from 2020 wk1

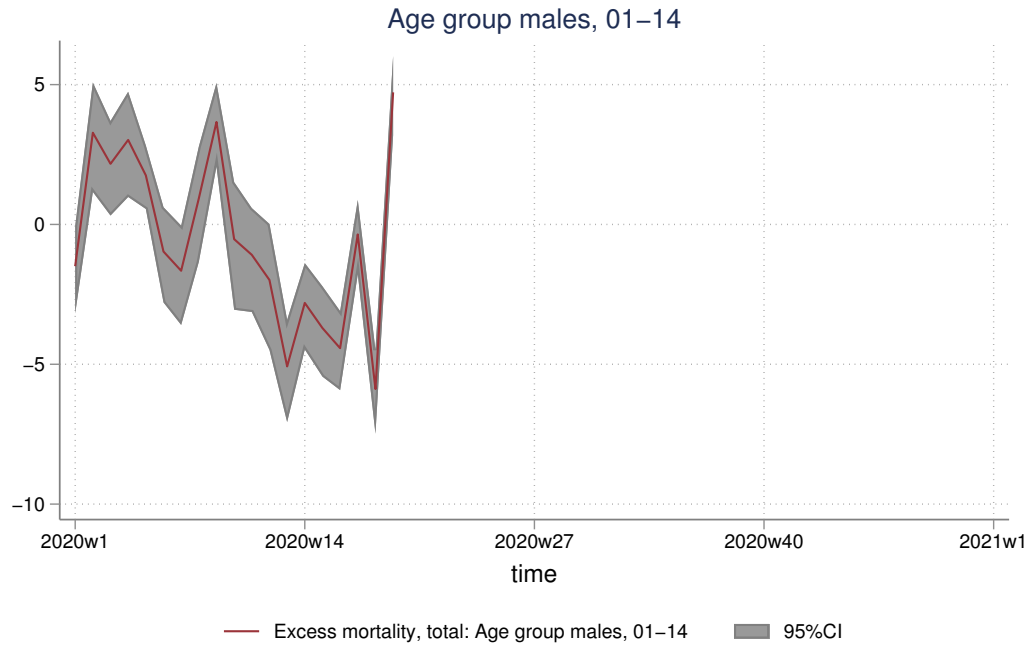

Figure 193: Males 01-14 all-cause excess deaths (-COVID19), from 2010 wk1

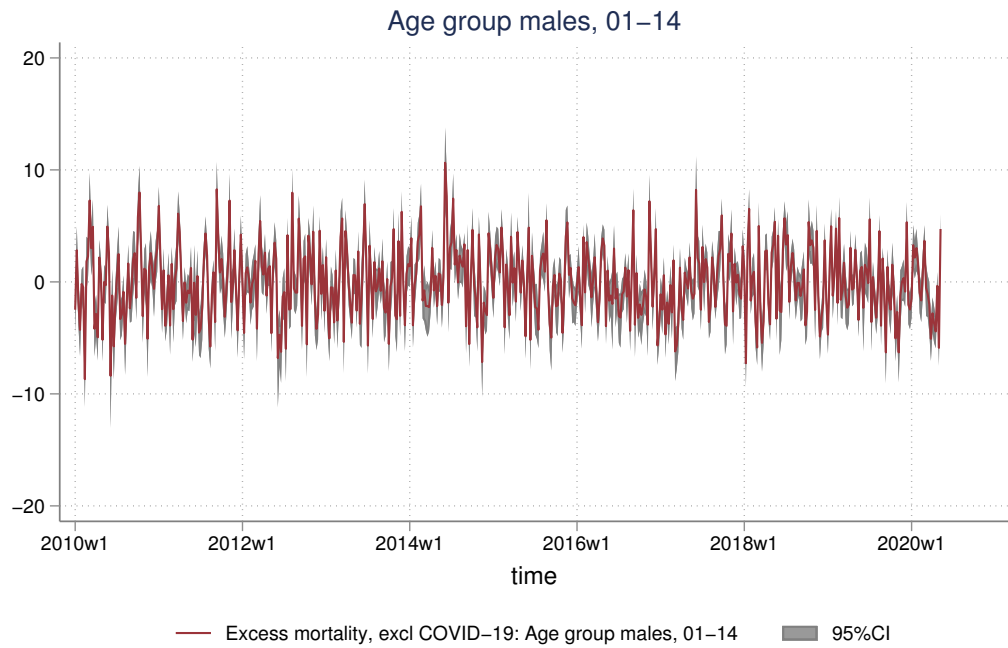

Figure 194: Males 01-14 all-cause excess deaths (-COVID19), from 2019 wk1

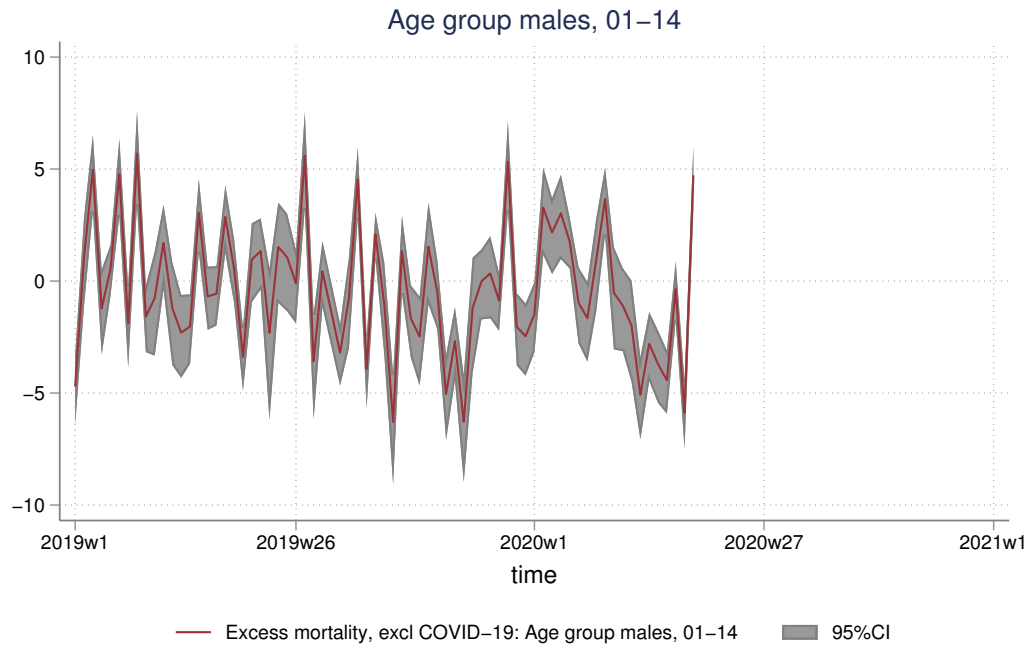

Figure 195: Males 01-14 all-cause excess deaths (-COVID19), from 2020 wk1

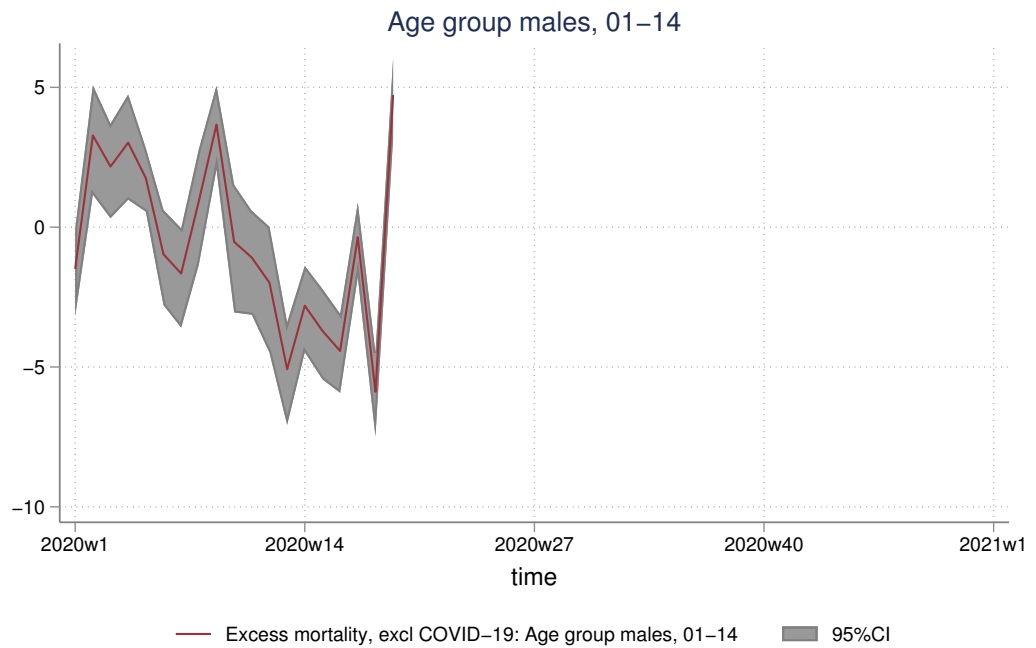

#### 4.4 Males aged 15-44

Figure 196: Males 15-44 mortality time trend and model, from 2010 wk1

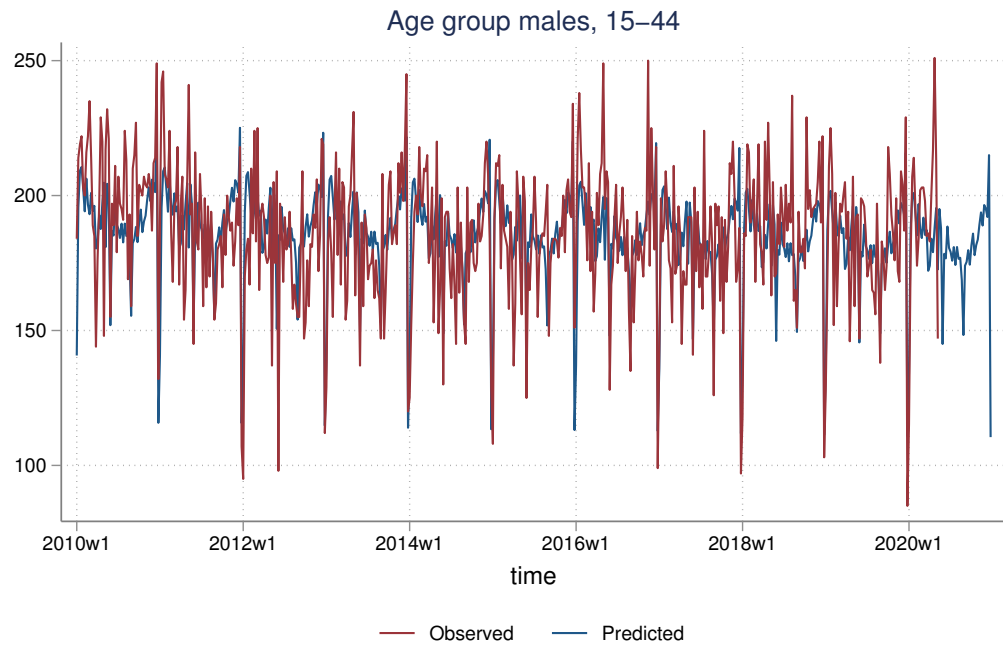

Figure 197: Males 15-44 mortality time trend and model, from 2019 wk1

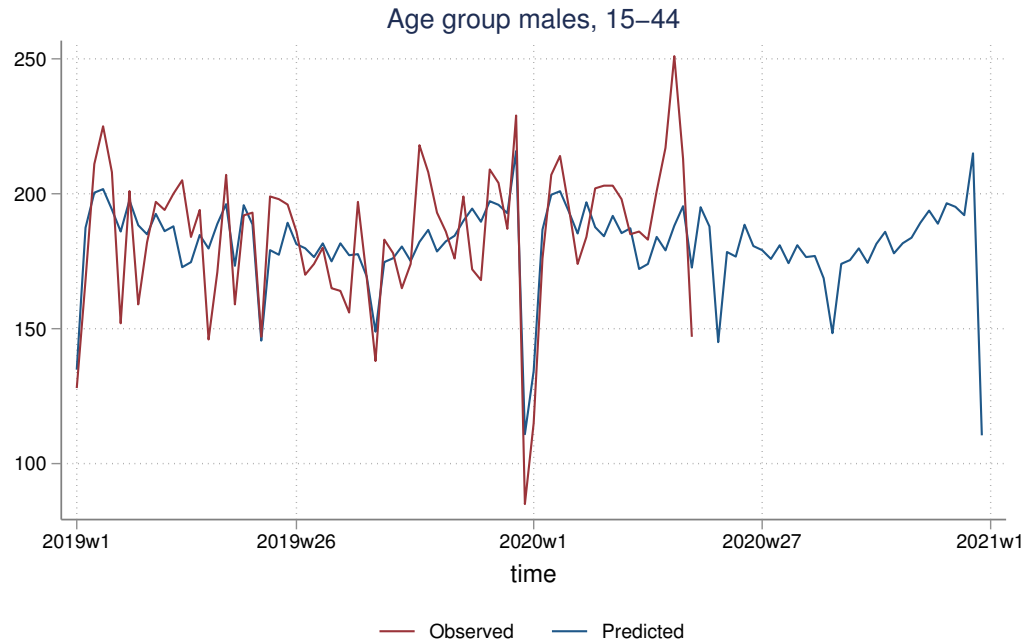

Figure 198: Males 15-44 mortality time trend and model, from 2020 wk1

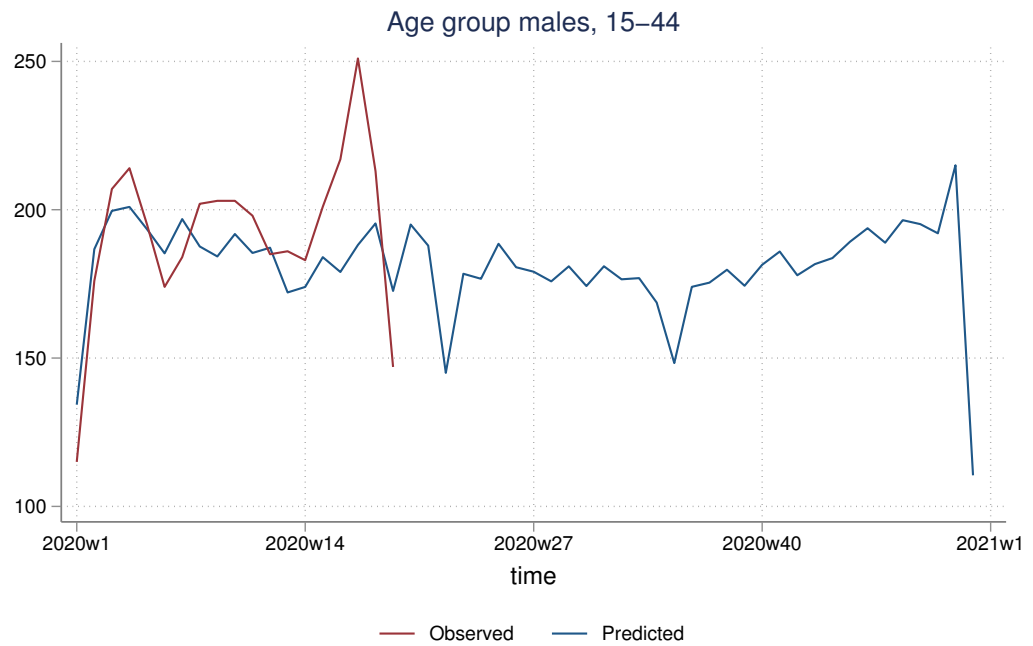



Figure 199: Males 15-44 all-cause excess deaths, from 2010 wk1

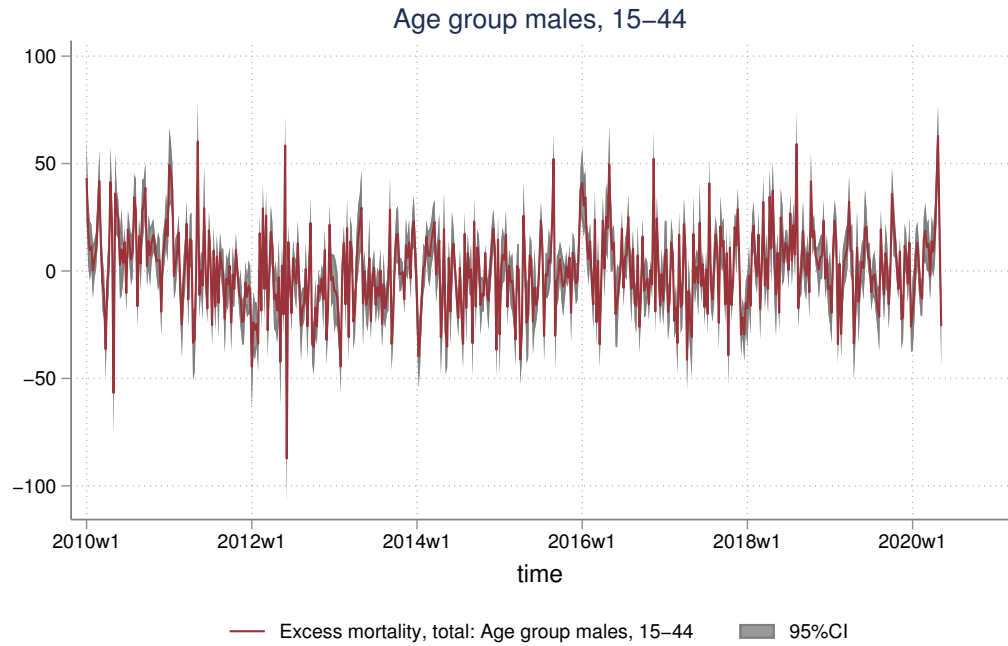

Figure 200: Males 15-44 all-cause excess deaths, from 2019 wk1

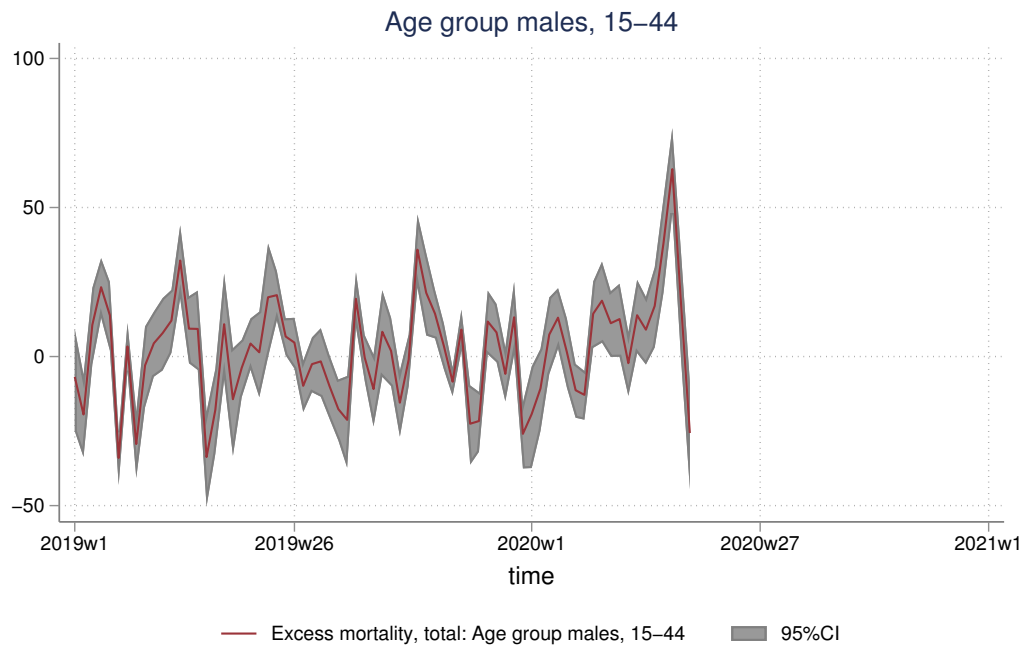

Figure 201: Males 15-44 all-cause excess deaths, from 2020 wk1

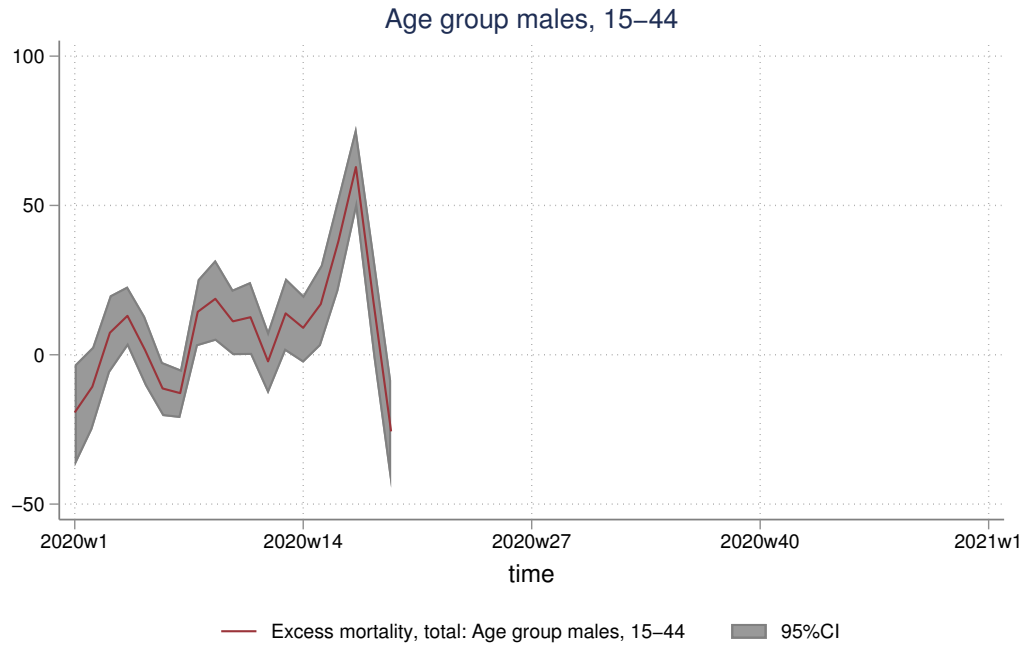

Figure 202: Males 15-44 all-cause excess deaths (-COVID19), from 2010 wk1

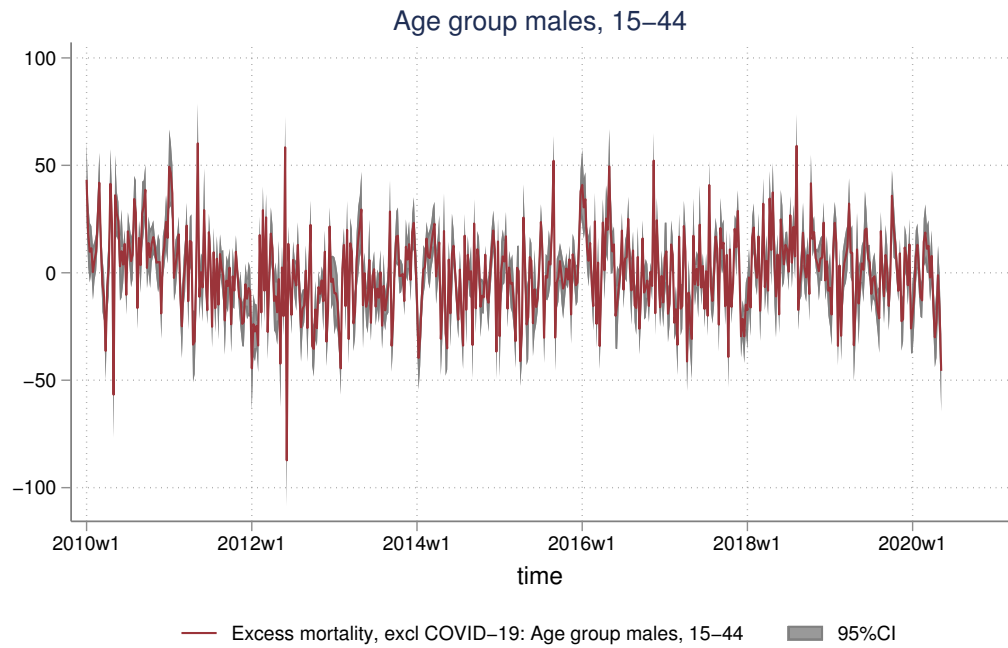

Figure 203: Males 15-44 all-cause excess deaths (-COVID19), from 2019 wk1

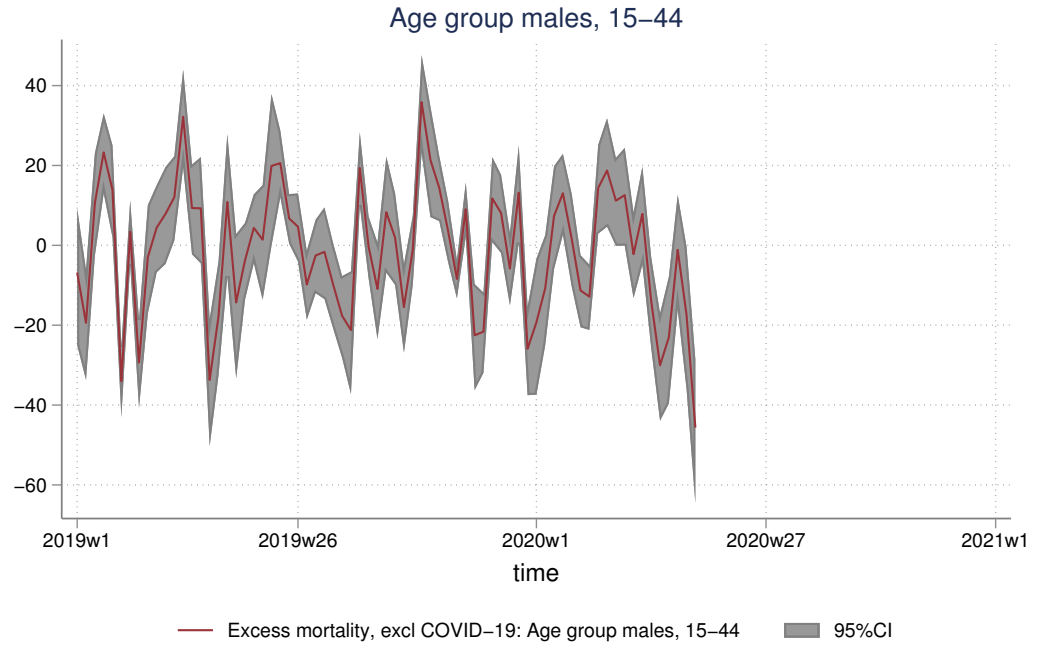

Figure 204: Males 15-44 all-cause excess deaths (-COVID19), from 2020 wk1

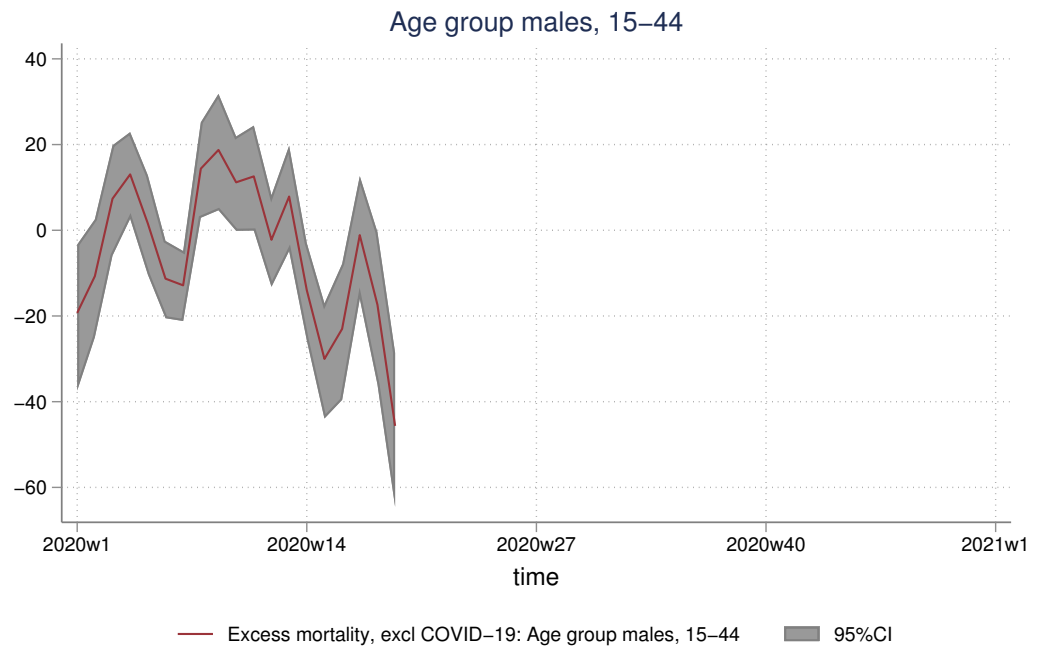

## 4.5 Males aged 45-64

Figure 205: Males 45-64 mortality time trend and model, from 2010 wk1

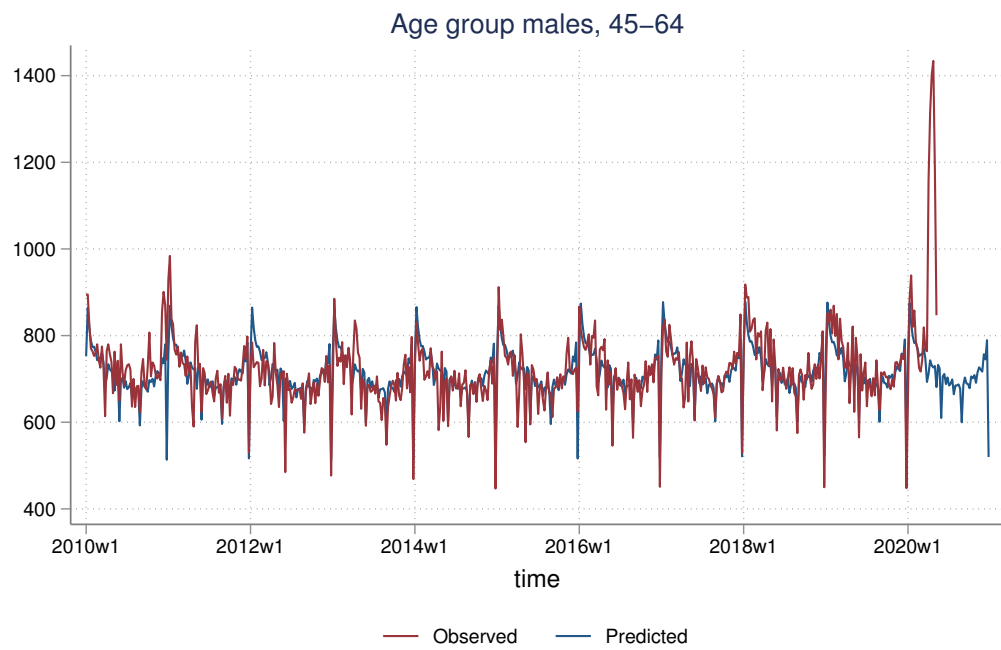

Figure 206: Males 45-64 mortality time trend and model, from 2019 wk1

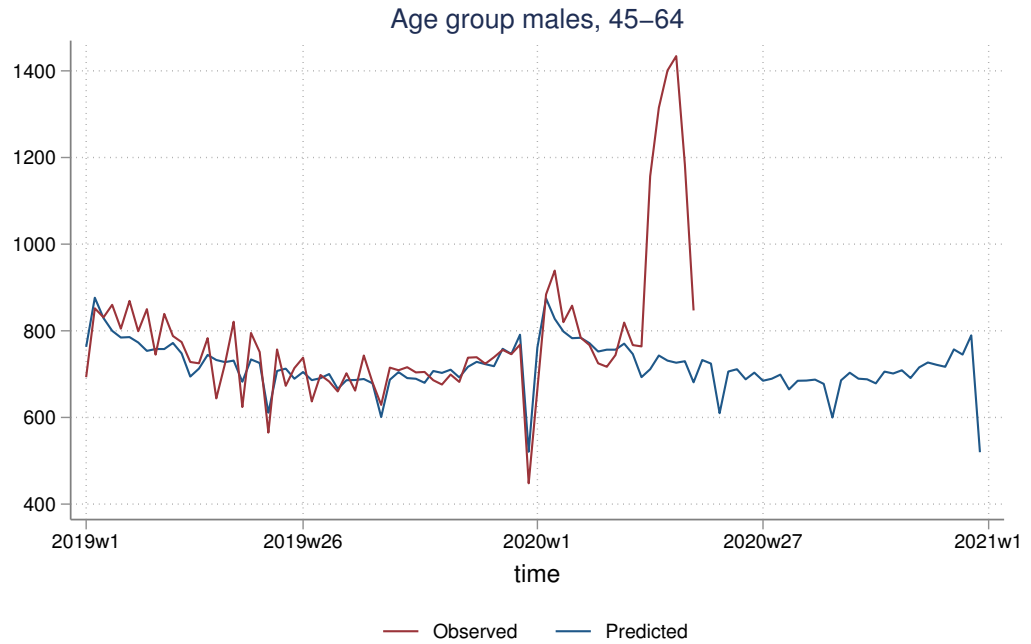

Figure 207: Males 45-64 mortality time trend and model, from 2020 wk1

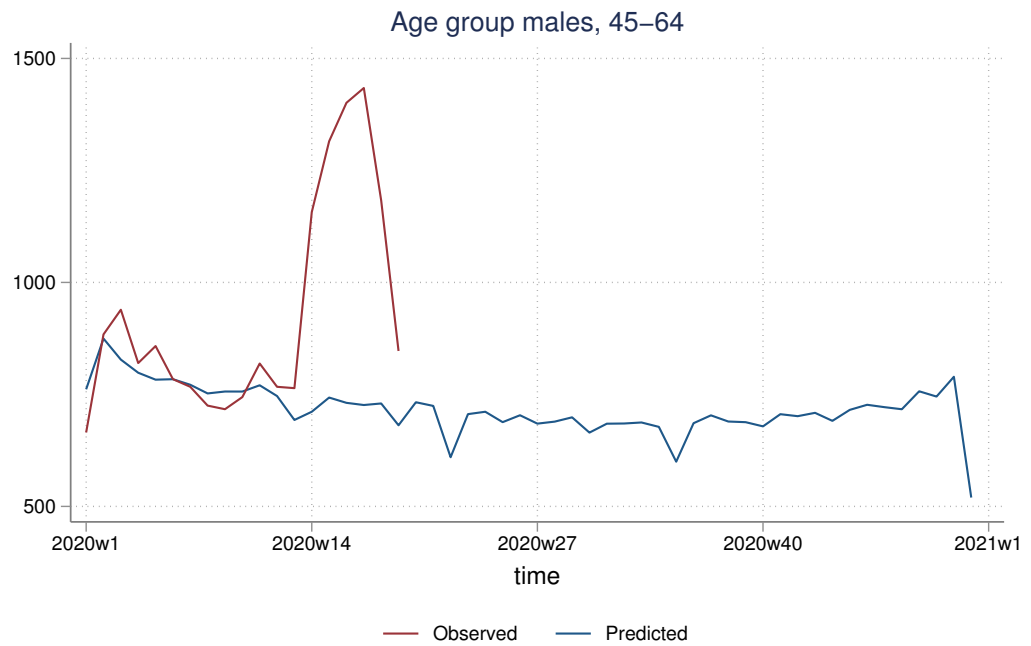

Figure 208: Males 45-64 all-cause excess deaths, from 2010 wk1

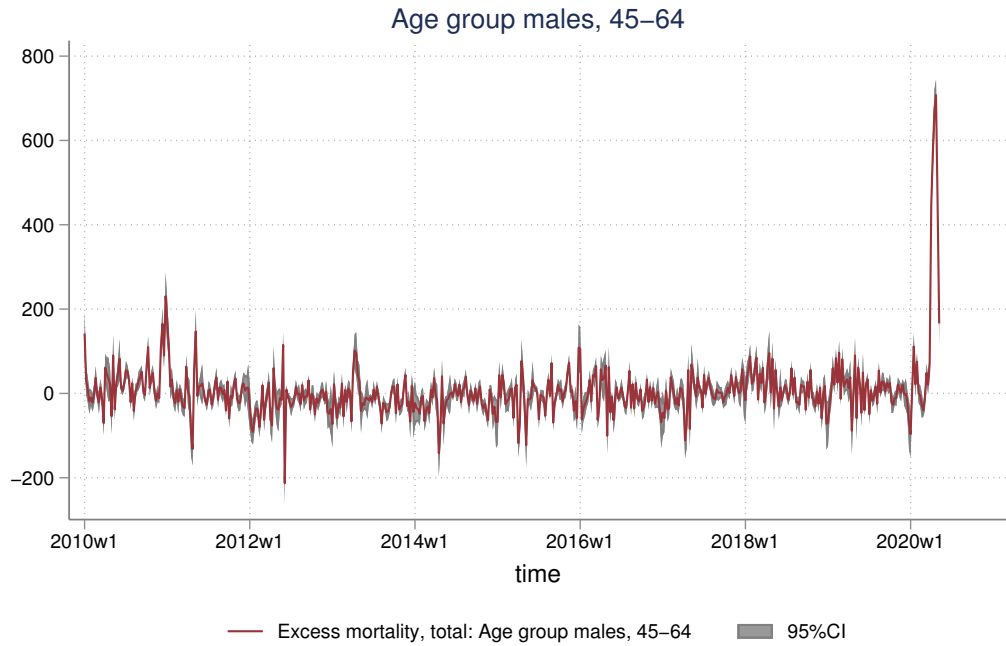

Figure 209: Males 45-64 all-cause excess deaths, from 2019 wk1

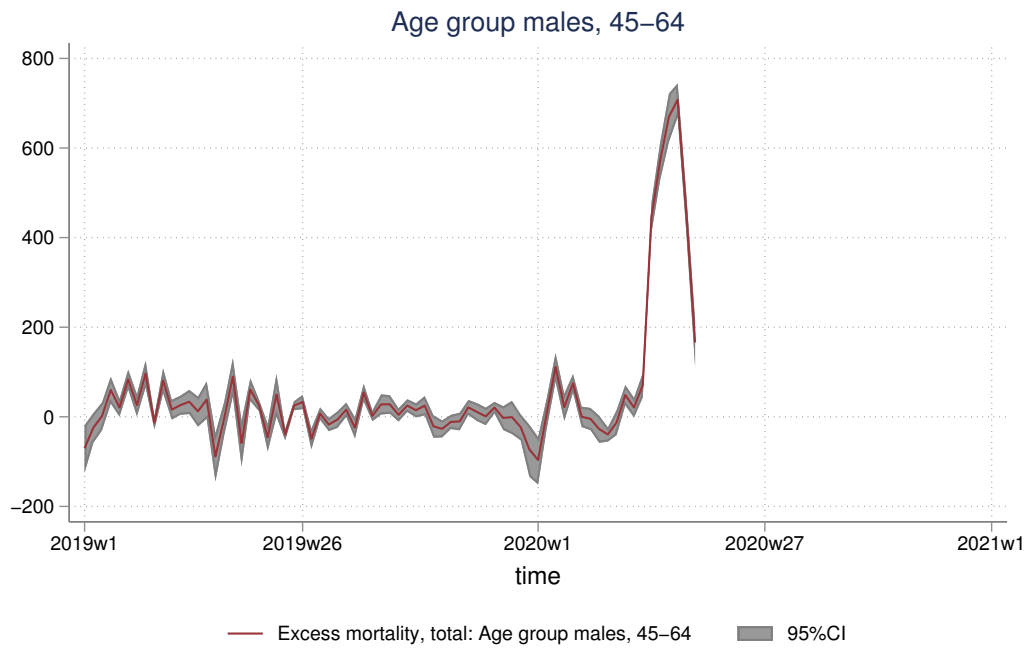

Figure 210: Males 45-64 all-cause excess deaths, from 2020 wk1

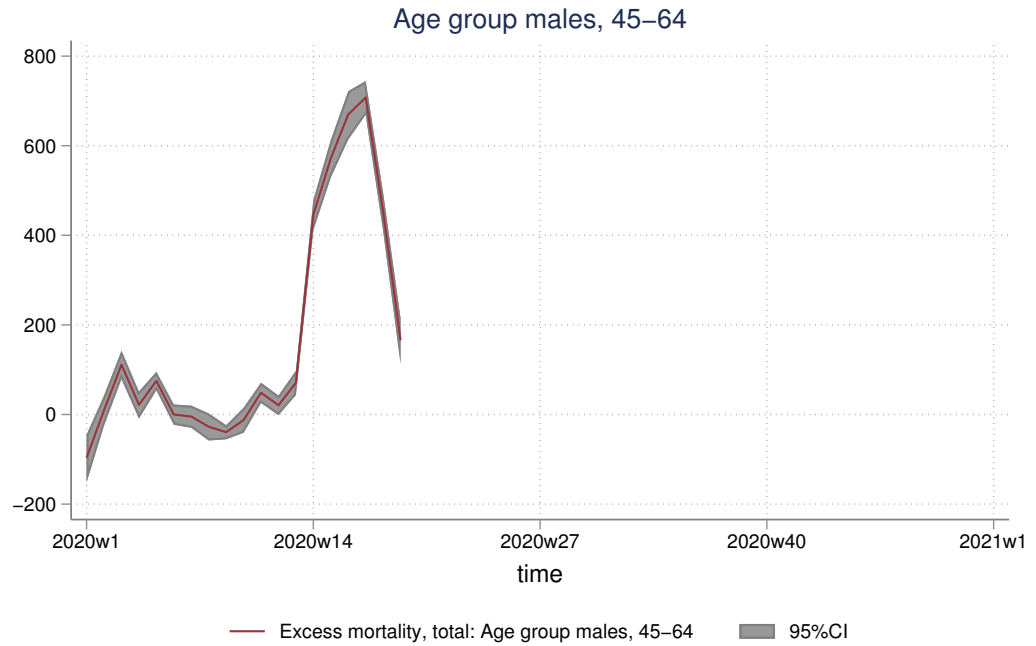

Figure 211: Males 45-64 all-cause excess deaths (-COVID19), from 2010 wk1

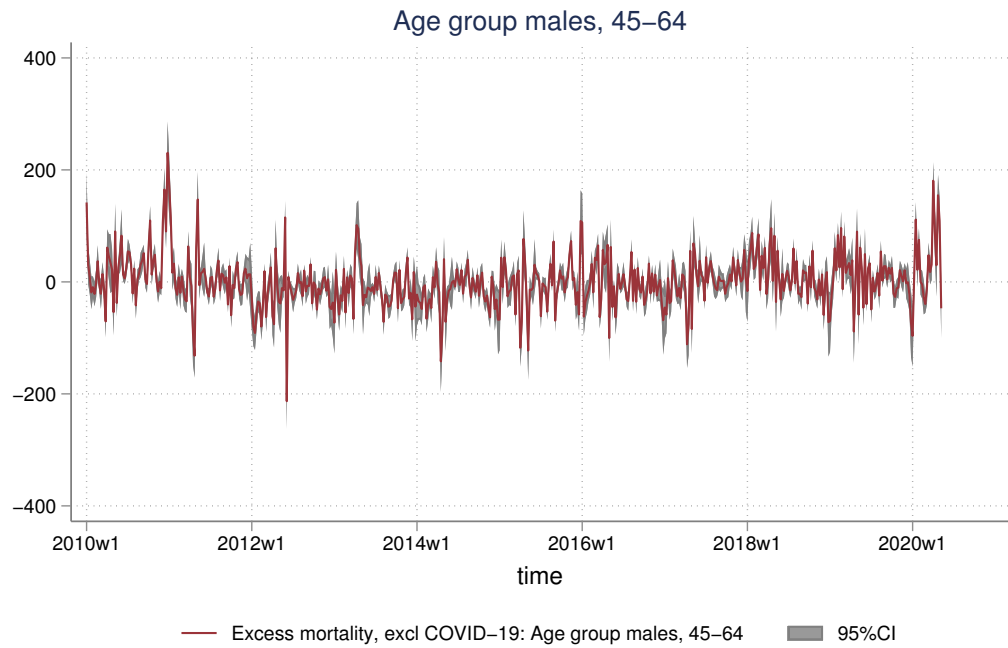

Figure 212: Males 45-64 all-cause excess deaths (-COVID19), from 2019 wk1

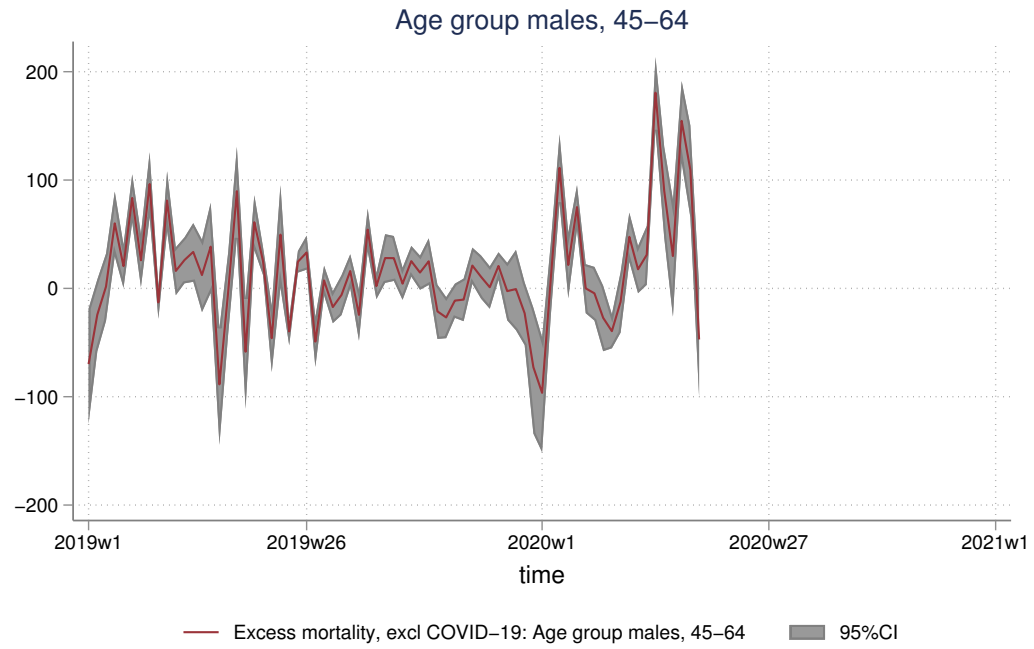

Figure 213: Males 45-64 all-cause excess deaths (-COVID19), from 2020 wk1

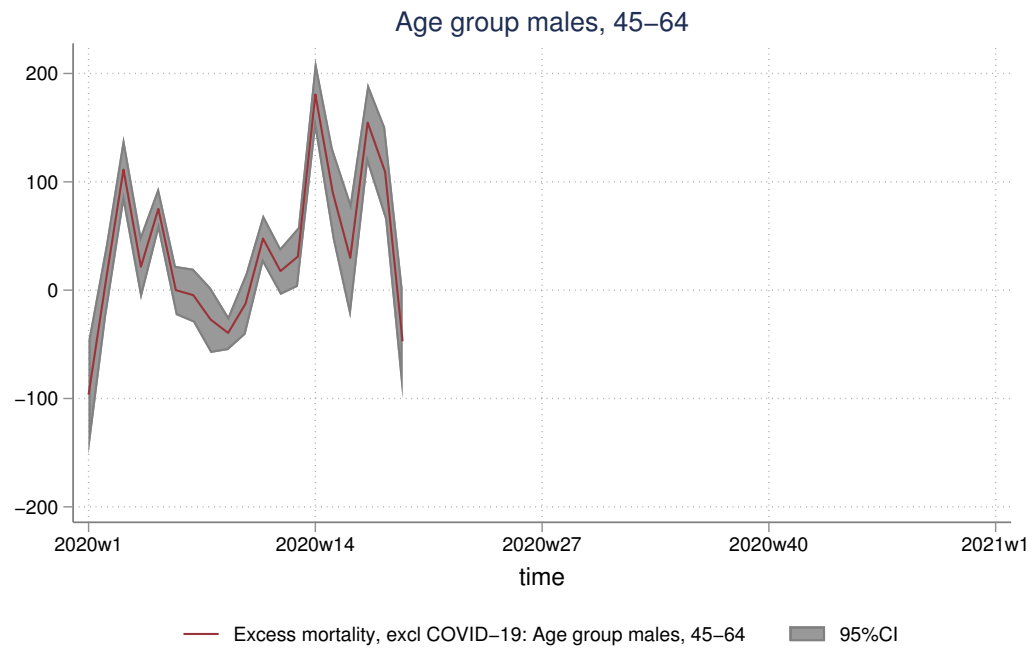



## 4.6 Males aged 65-74

Figure 214: Males 65-74 mortality time trend and model, from 2010 wk1

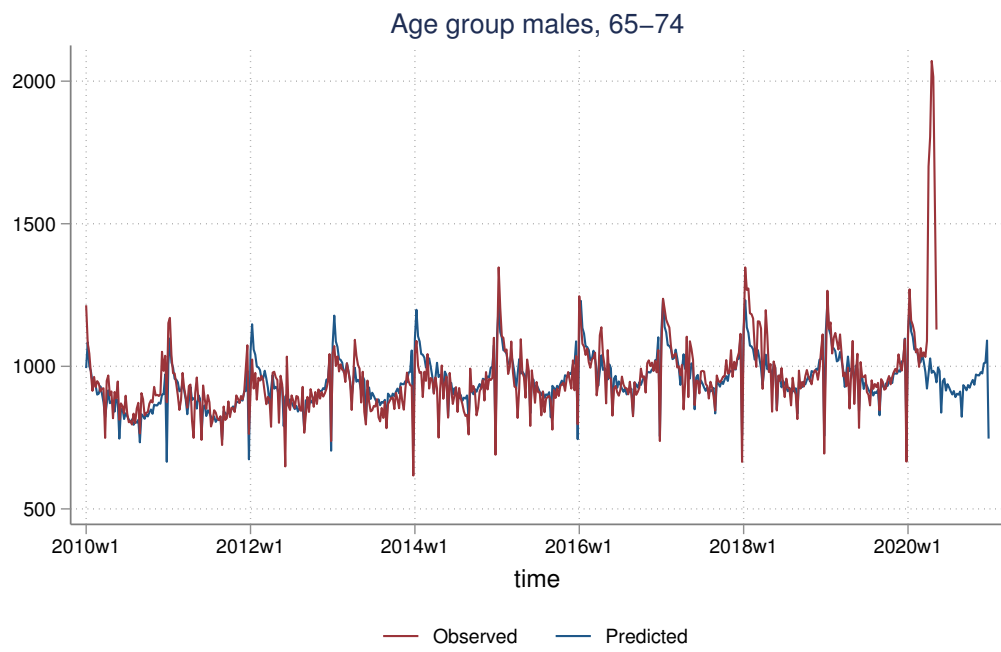

Figure 215: Males 65-74 mortality time trend and model, from 2019 wk1

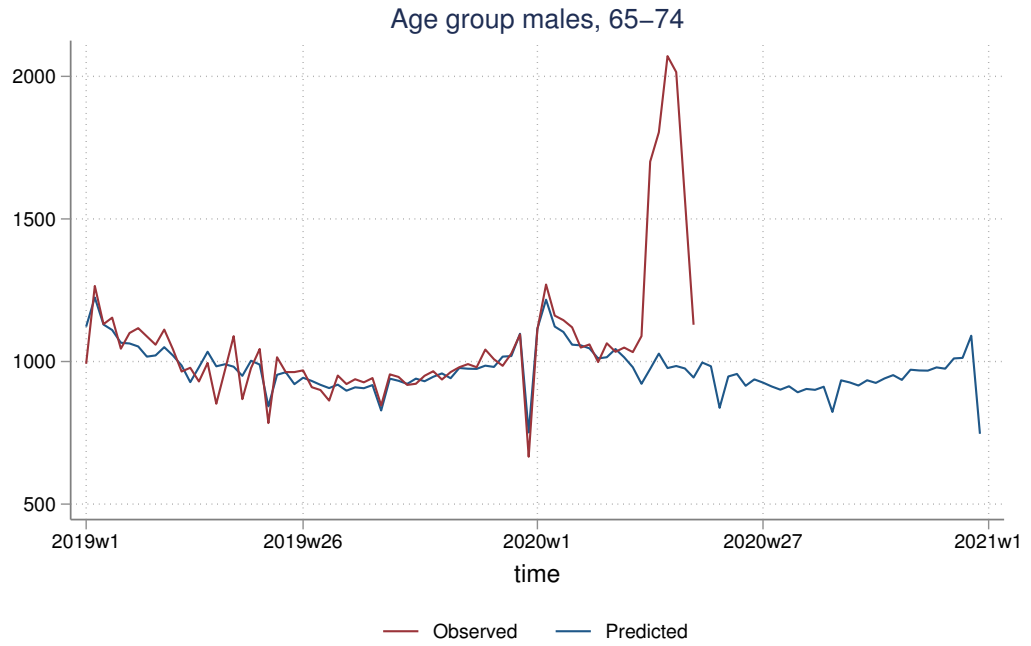

Figure 216: Males 65-74 mortality time trend and model, from 2020 wk1

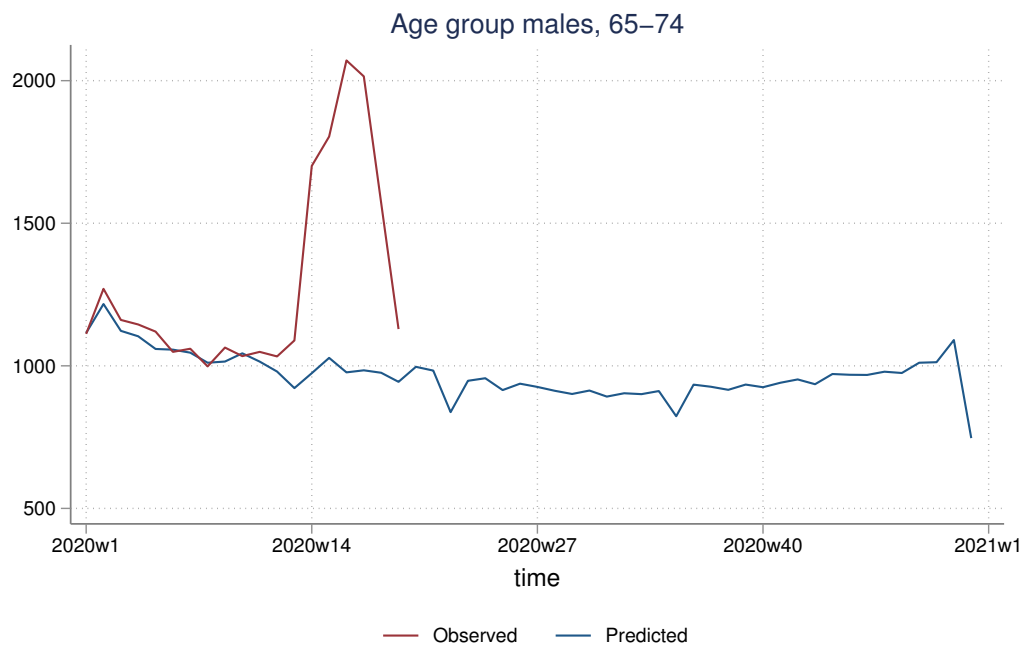

Figure 217: Males 65-74 all-cause excess deaths, from 2010 wk1

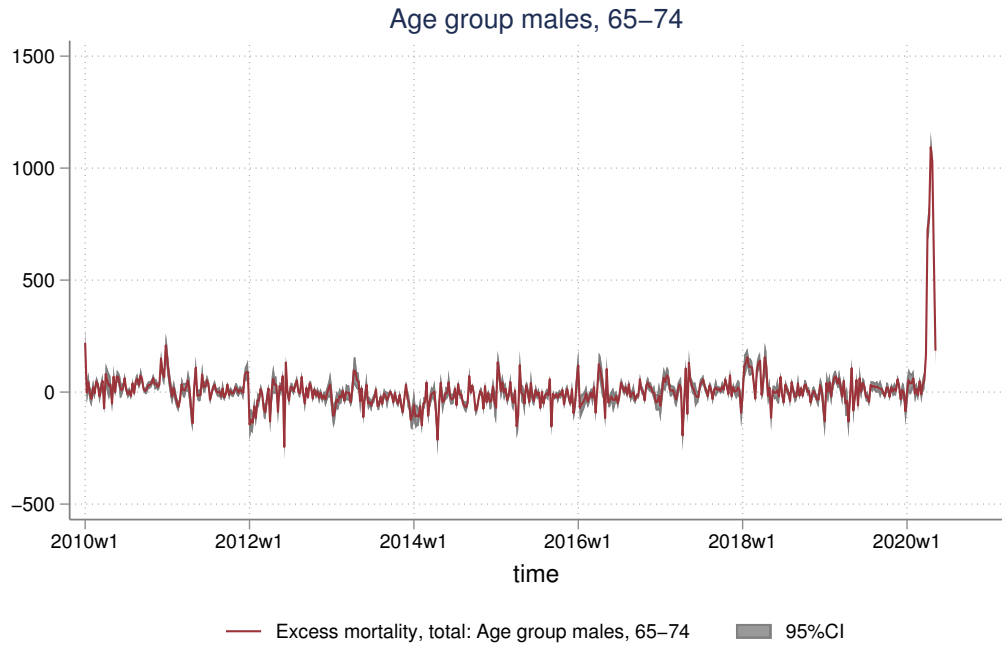

Figure 218: Males 65-74 all-cause excess deaths, from 2019 wk1

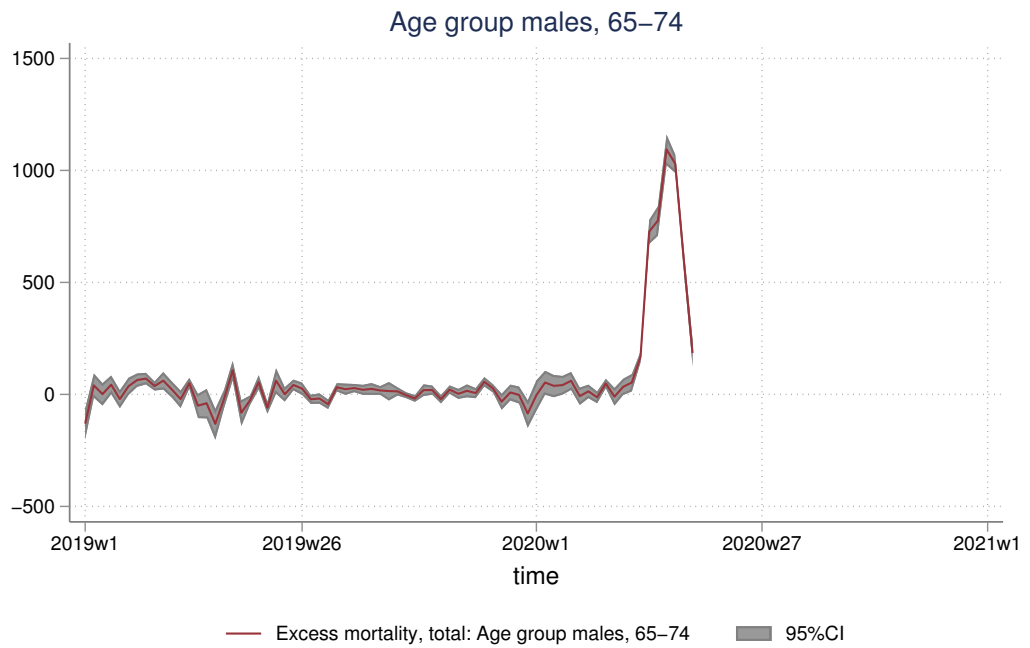

Figure 219: Males 65-74 all-cause excess deaths, from 2020 wk1

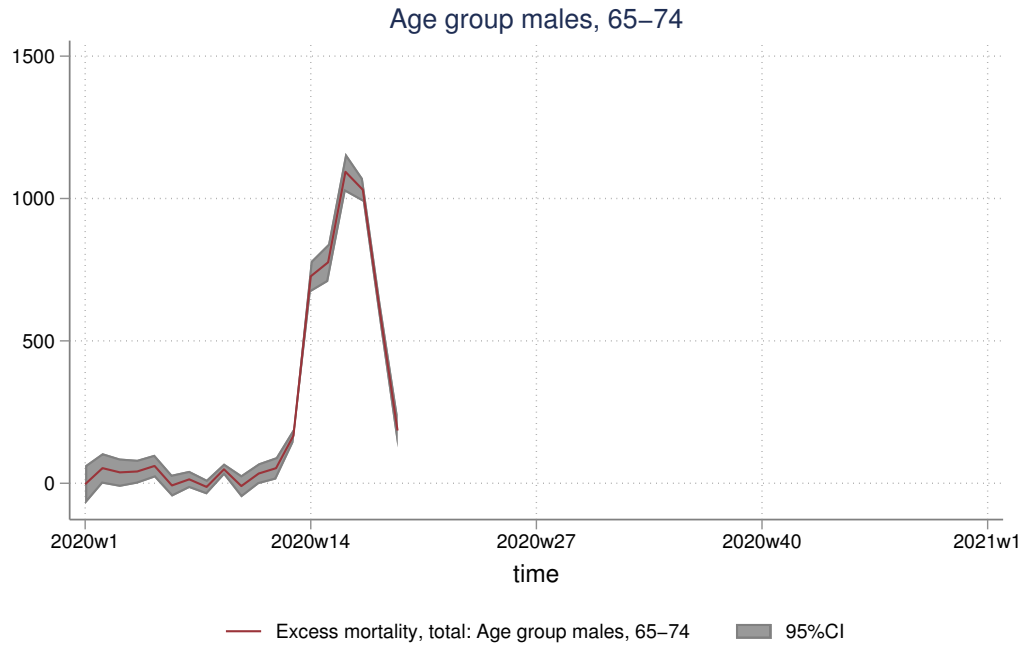

Figure 220: Males 65-74 all-cause excess deaths (-COVID19), from 2010 wk1

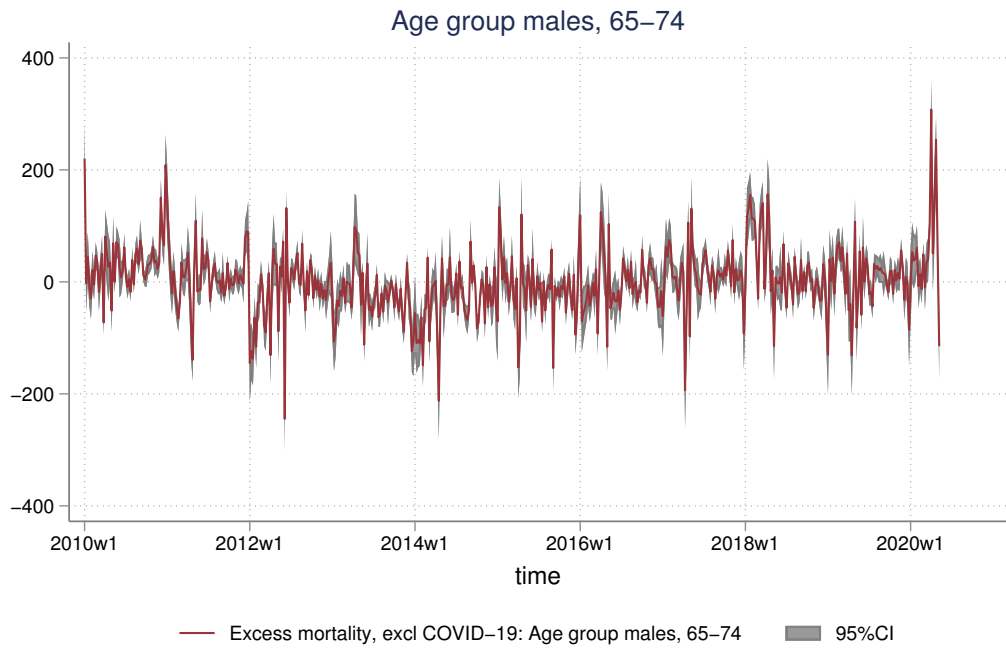

Figure 221: Males 65-74 all-cause excess deaths (-COVID19), from 2019 wk1

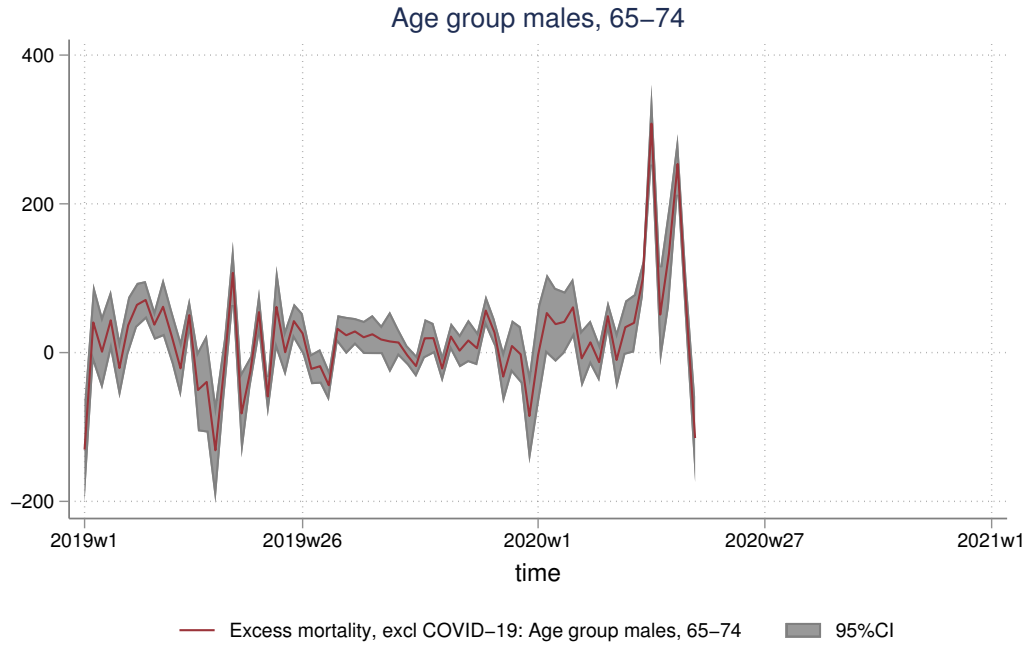

Figure 222: Males 65-74 all-cause excess deaths (-COVID19), from 2020 wk1

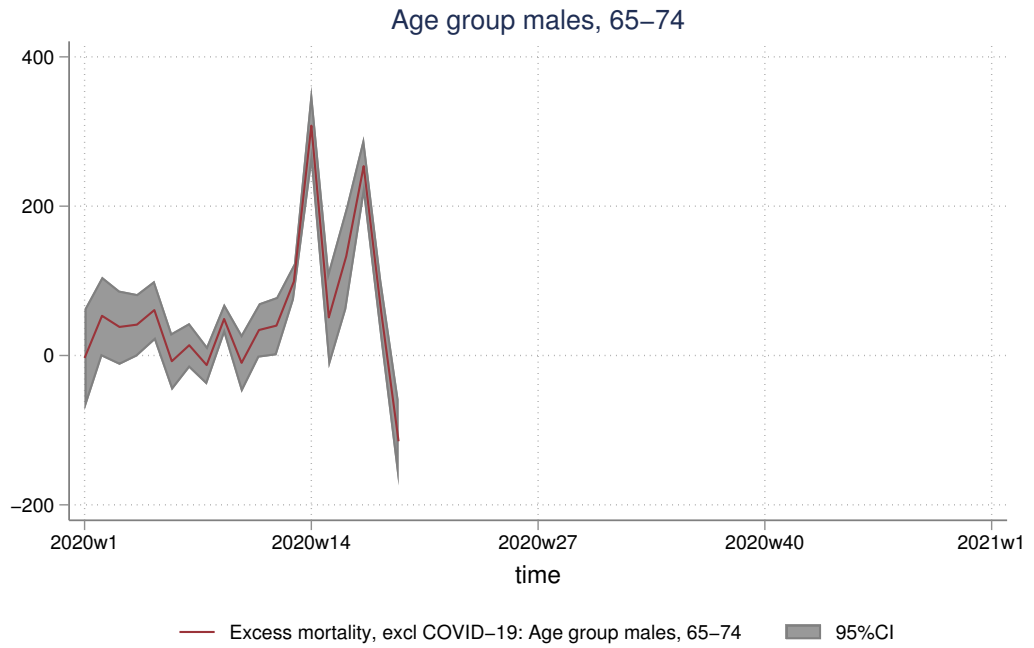

## 4.7 Males aged 75-84

Figure 223: Males 75-84 mortality time trend and model, from 2010 wk1

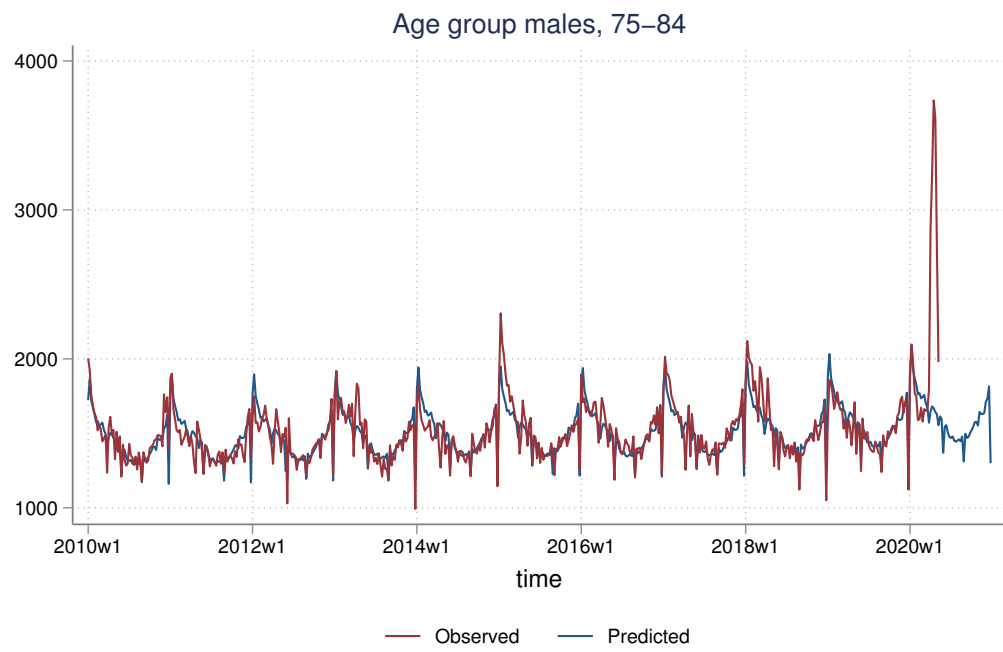

Figure 224: Males 75-84 mortality time trend and model, from 2019 wk1

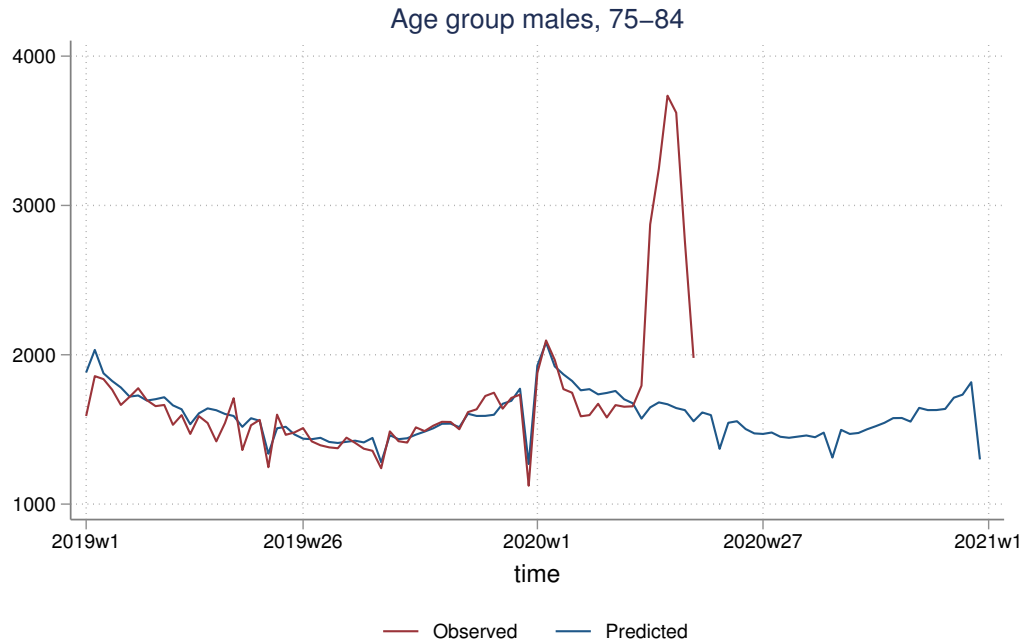

Figure 225: Males 75-84 mortality time trend and model, from 2020 wk1

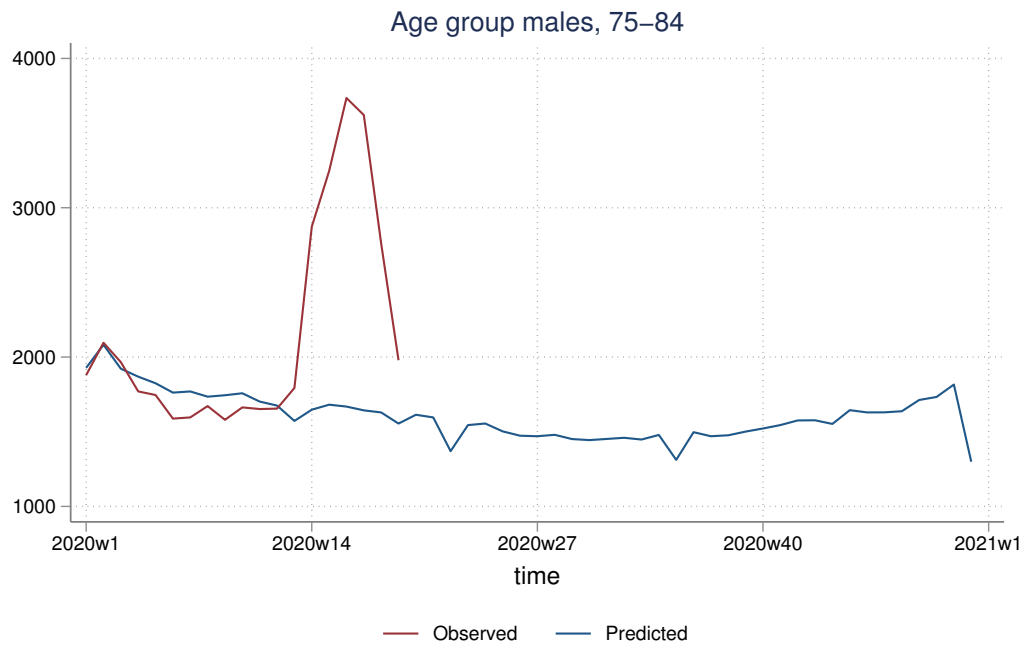

Figure 226: Males 75-84 all-cause excess deaths, from 2010 wk1

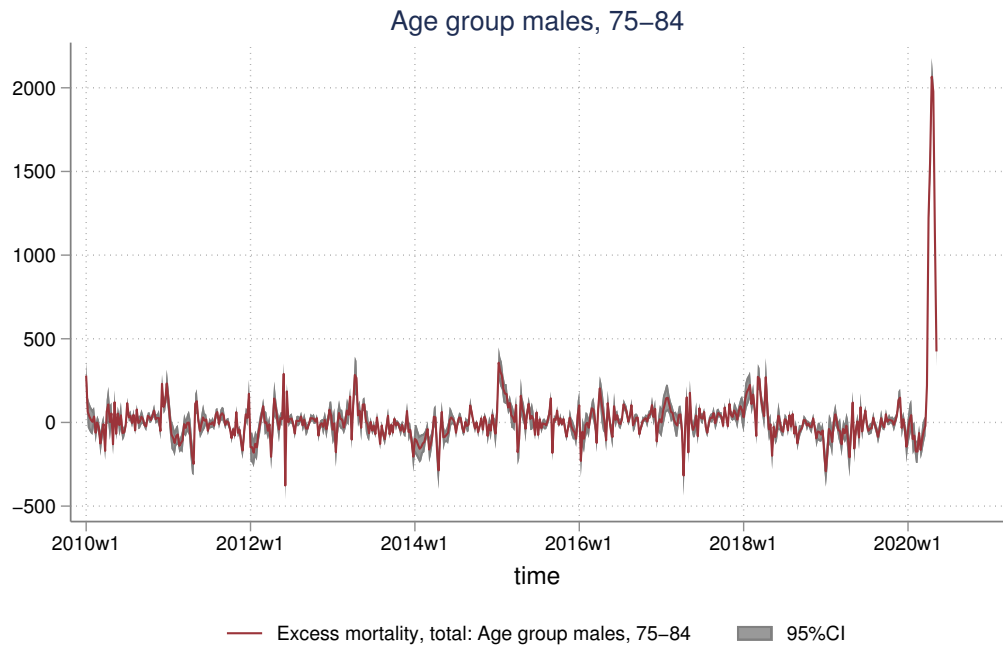

Figure 227: Males 75-84 all-cause excess deaths, from 2019 wk1

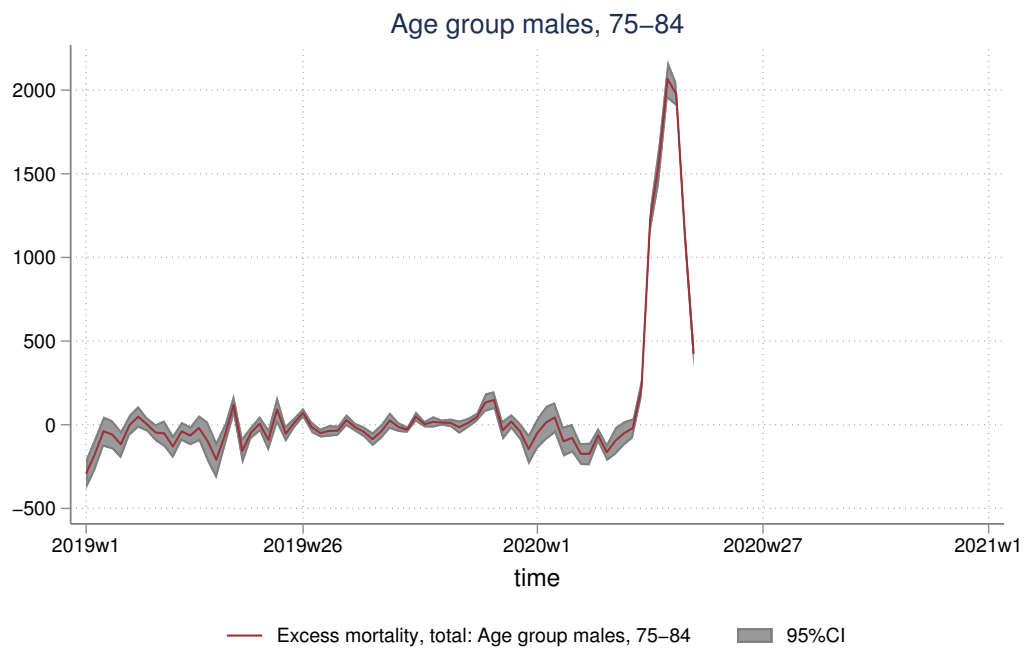



Figure 228: Males 75-84 all-cause excess deaths, from 2020 wk1

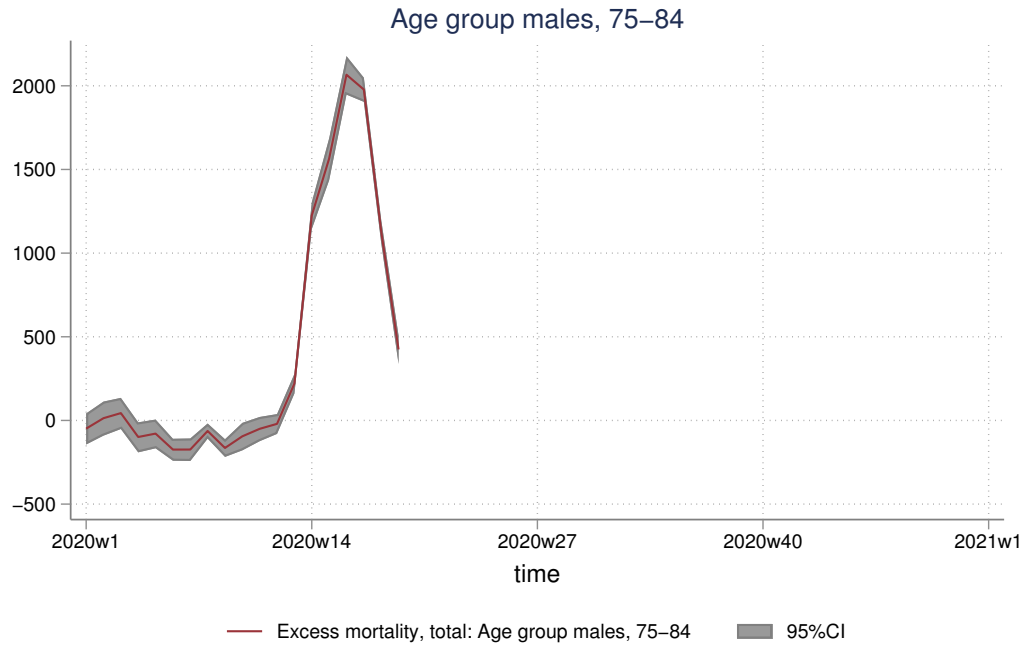

Figure 229: Males 75-84 all-cause excess deaths (-COVID19), from 2010 wk1

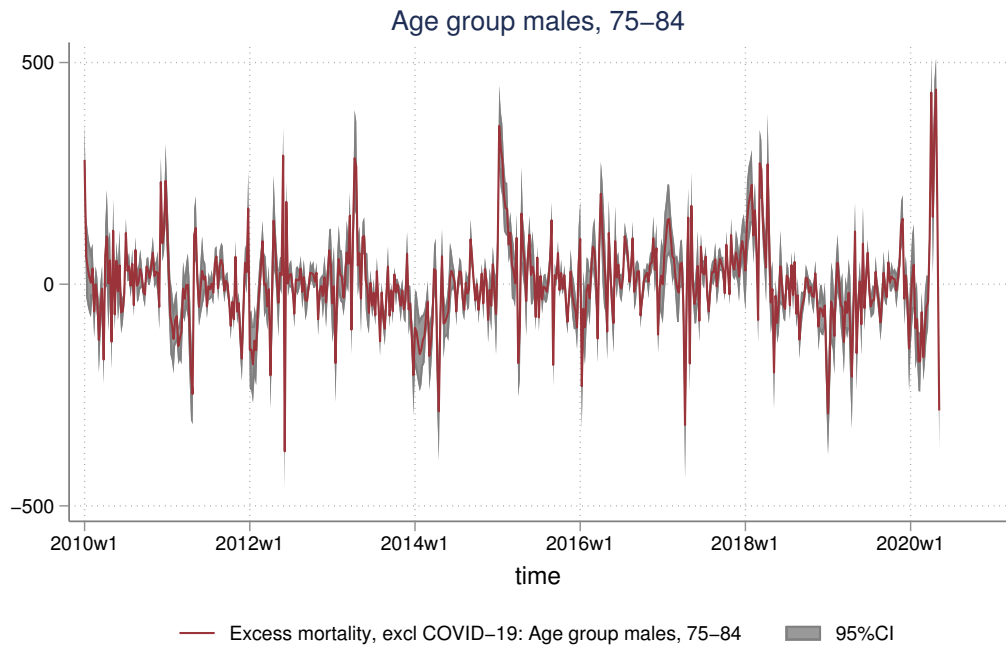

Figure 230: Males 75-84 all-cause excess deaths (-COVID19), from 2019 wk1

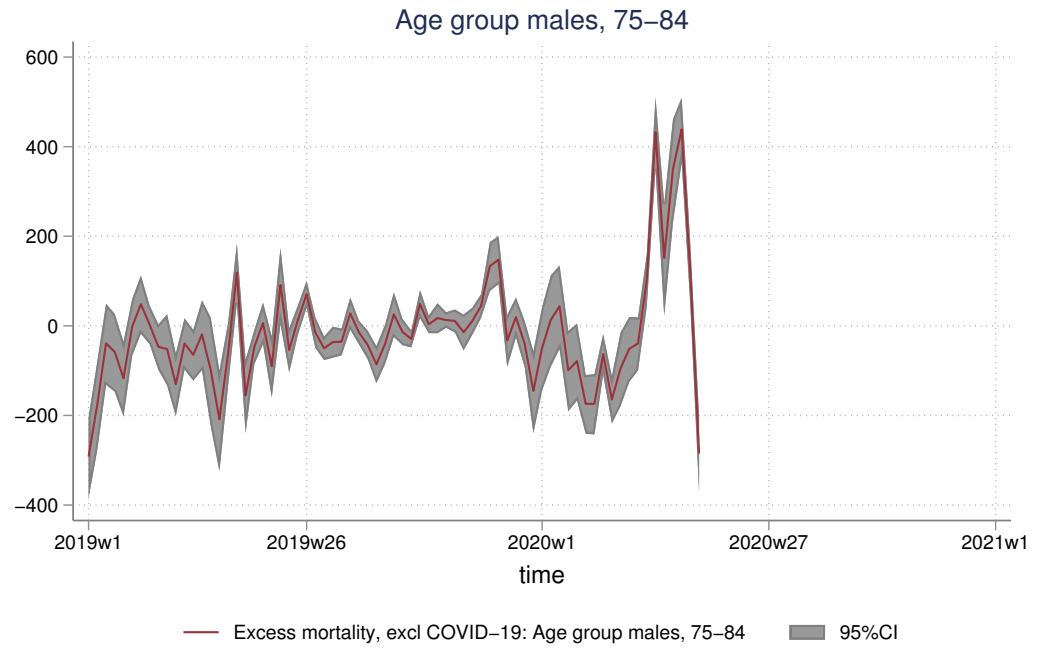

Figure 231: Males 75-84 all-cause excess deaths (-COVID19), from 2020 wk1

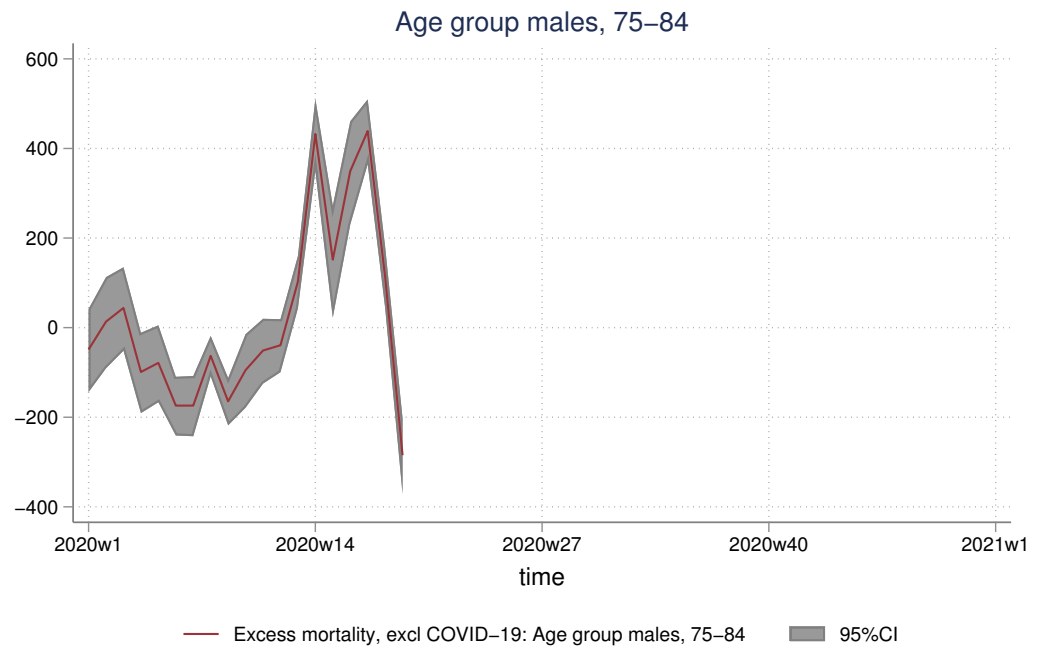

## 4.8 Males aged 85+

Figure 232: Males 85+ mortality time trend and model, from 2010 wk1

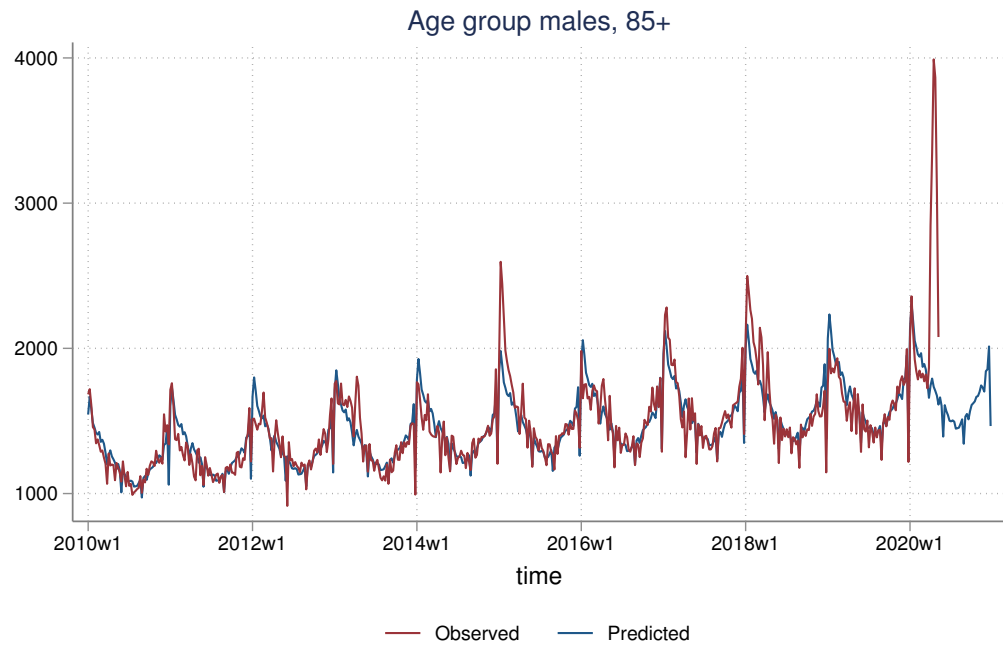

Figure 233: Males 85+ mortality time trend and model, from 2019 wk1

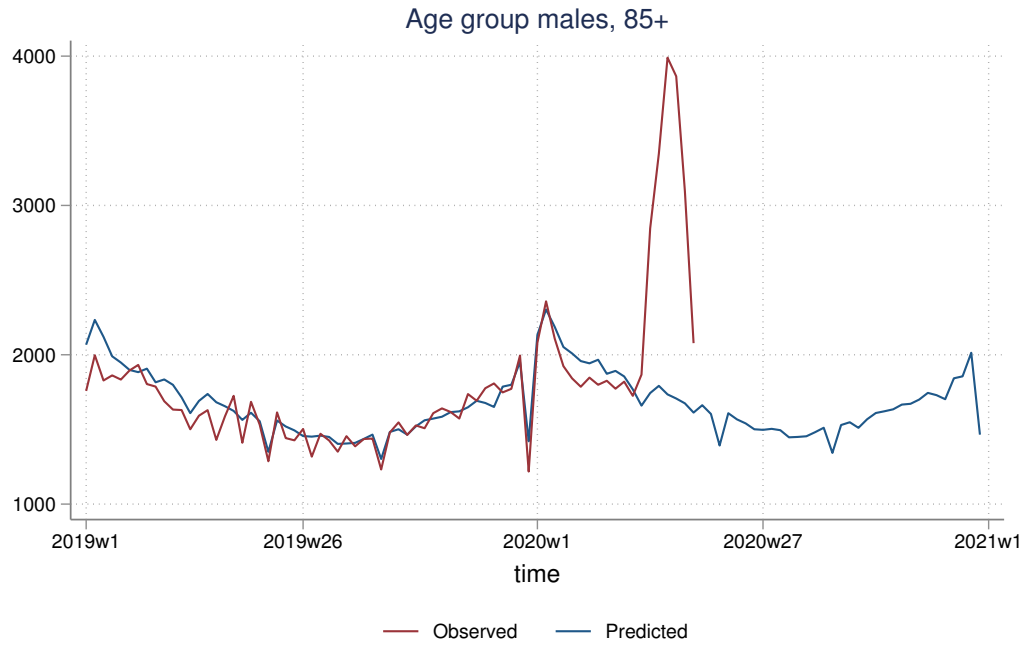

Figure 234: Males 85+ mortality time trend and model, from 2020 wk1

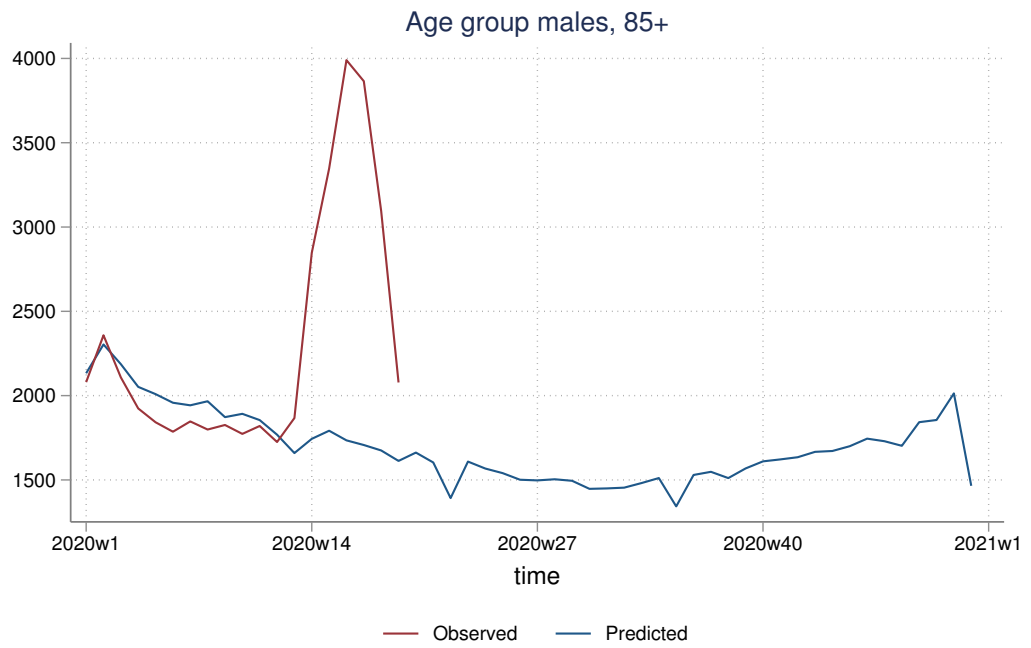

Figure 235: Males 85+ all-cause excess deaths, from 2010 wk1

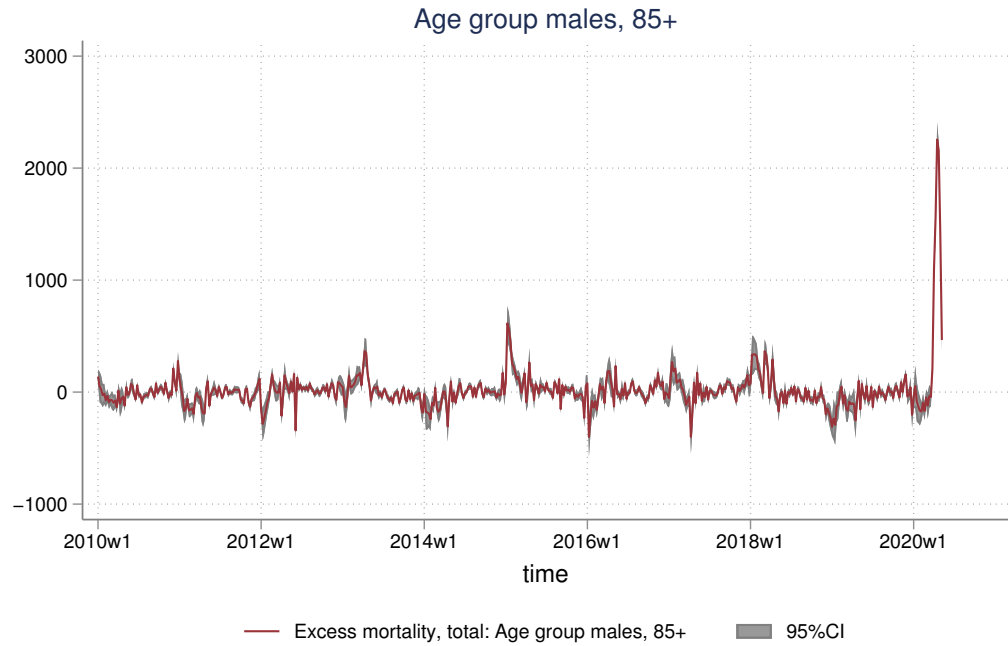

Figure 236: Males 85+ all-cause excess deaths, from 2019 wk1

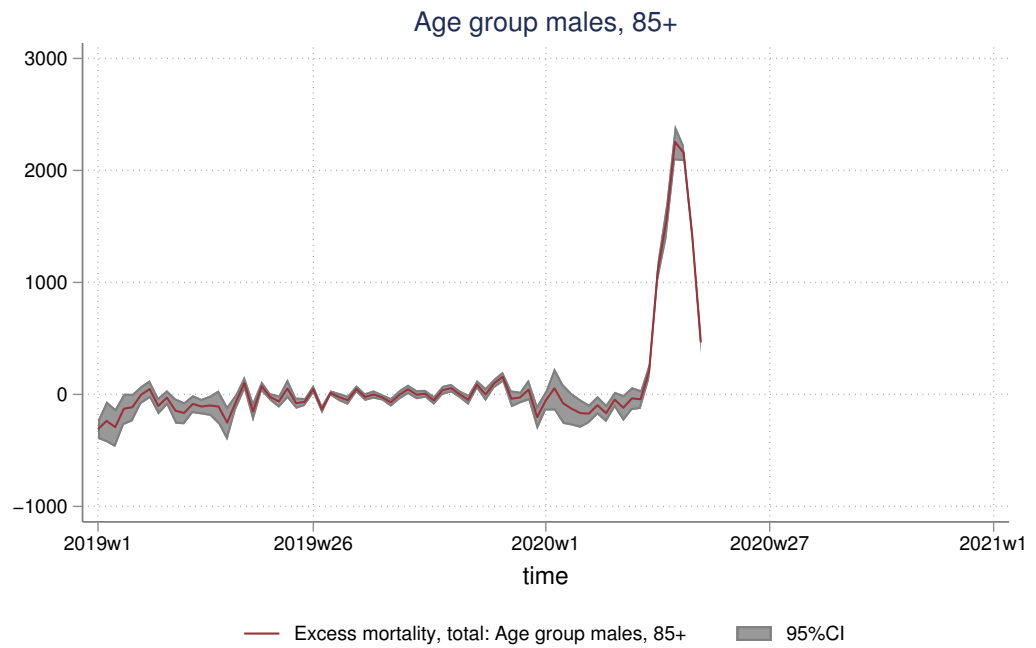

Figure 237: Males 85+ all-cause excess deaths, from 2020 wk1

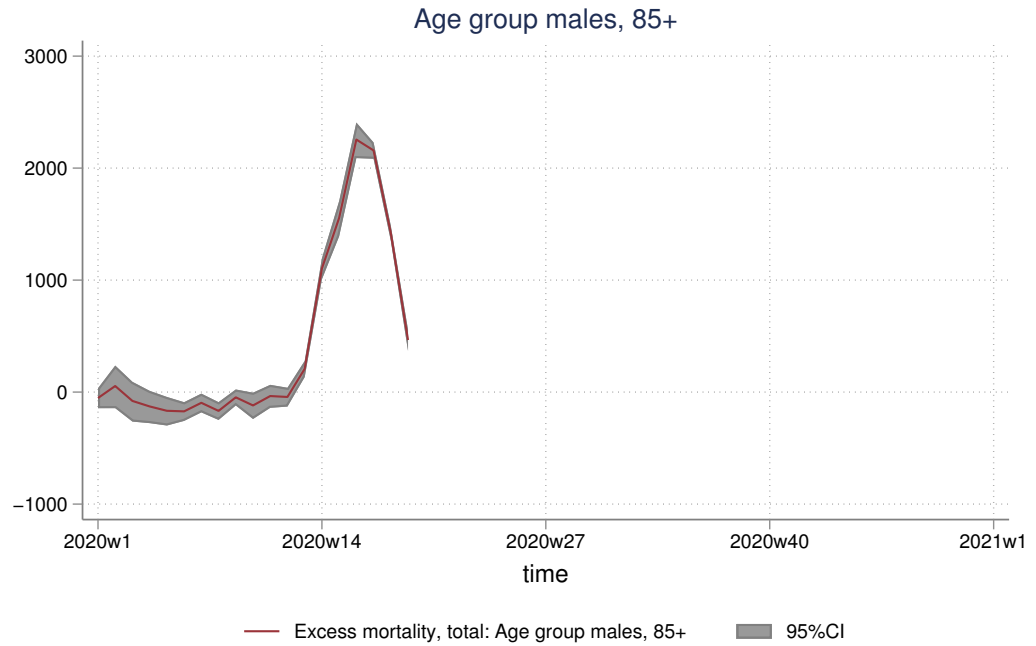

Figure 238: Males 85+ all-cause excess deaths (-COVID19), from 2010 wk1

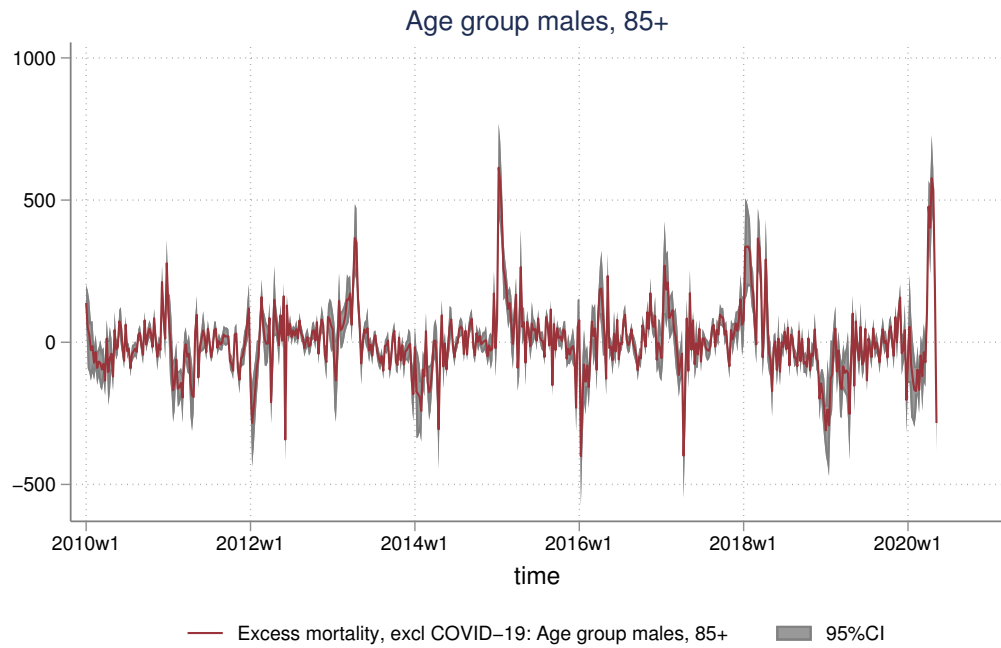

Figure 239: Males 85+ all-cause excess deaths (-COVID19), from 2019 wk1

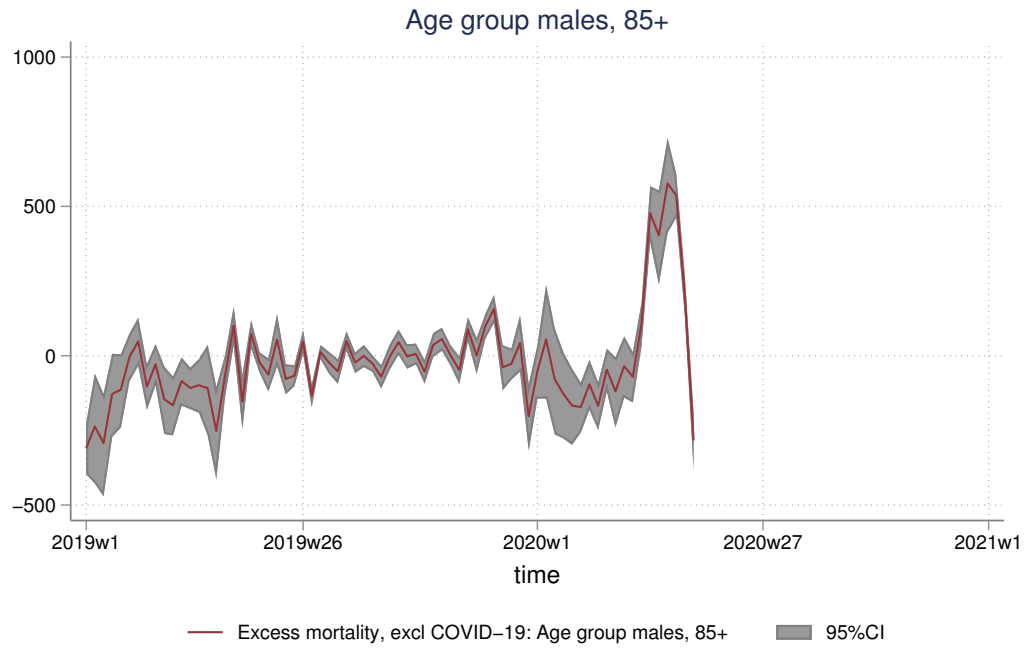

Figure 240: Males 85+ all-cause excess deaths (-COVID19), from 2020 wk1

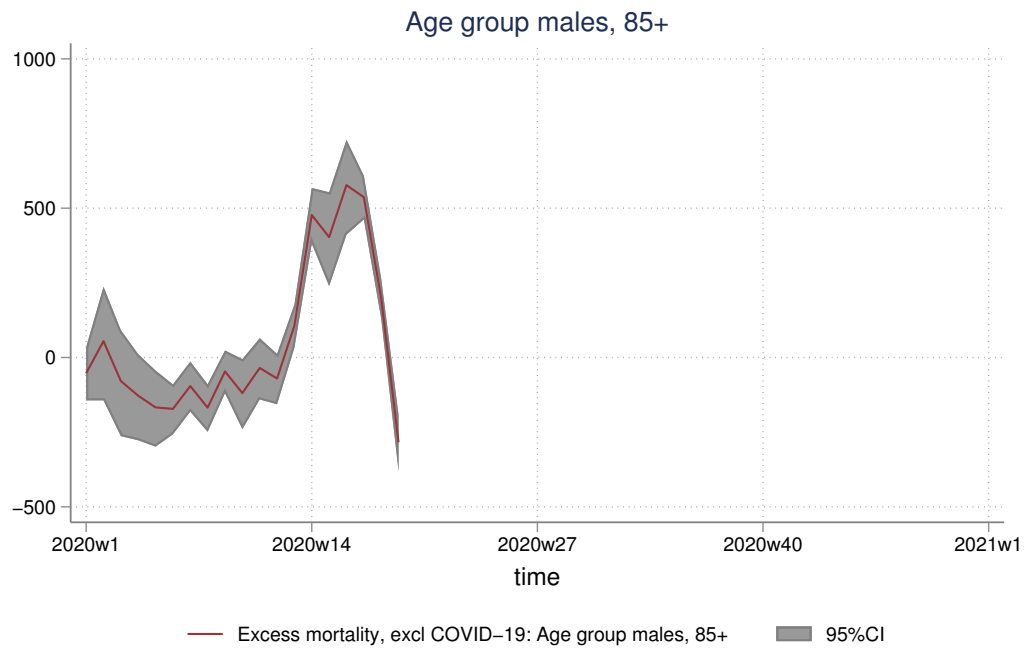

## 5 Age groups, females

### 5.1 Time trends

Figure 241: Female age group mortality time trends, fm 2010 wk1

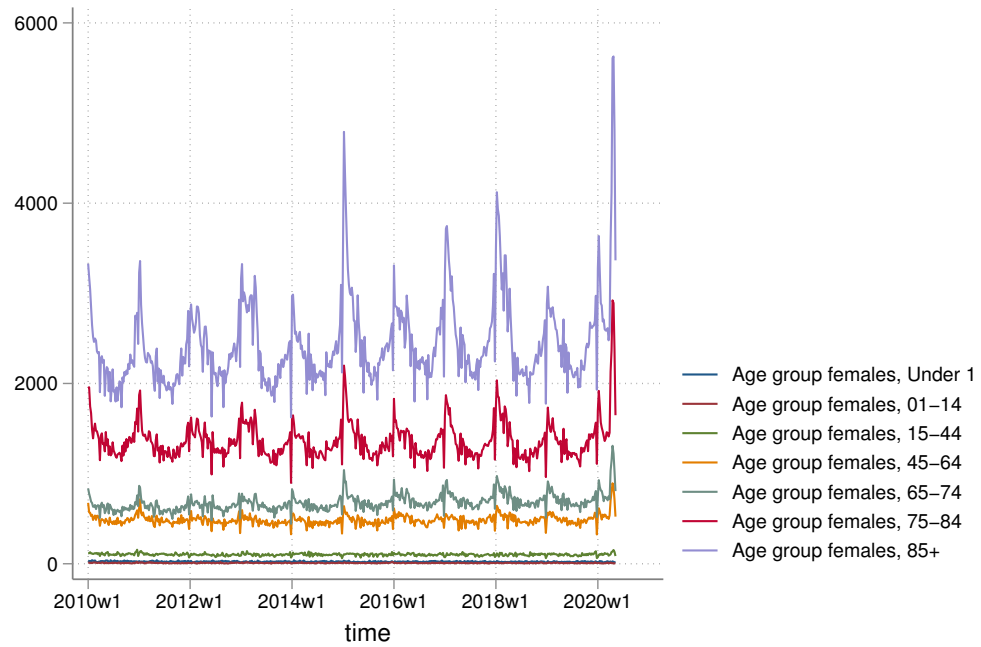



Figure 242: Female age group mortality time trends, fm 2019 wk1

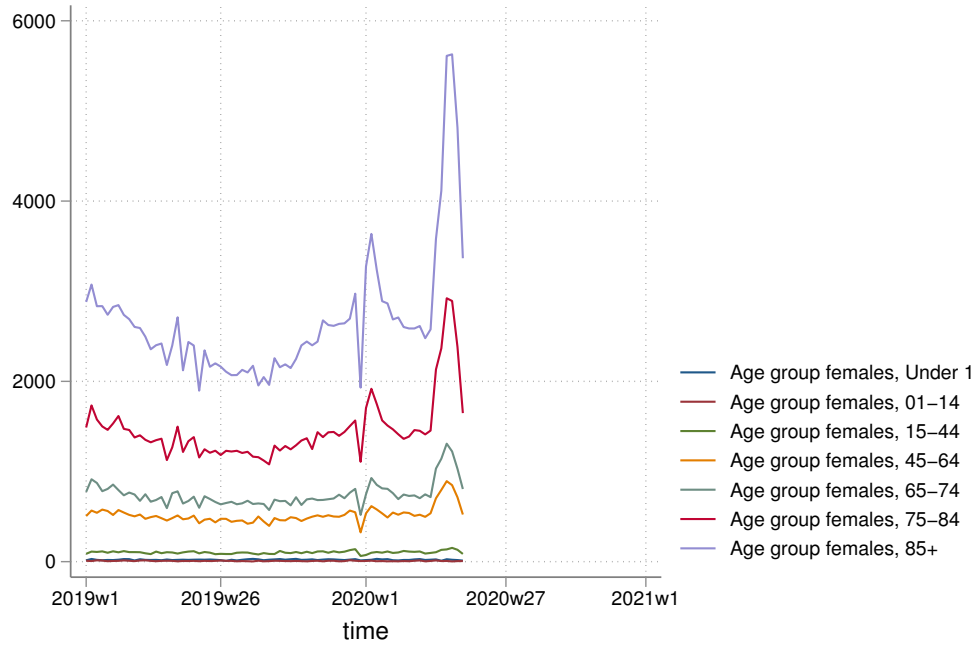

Figure 243: Female age group mortality time trends, fm 2020 wk1

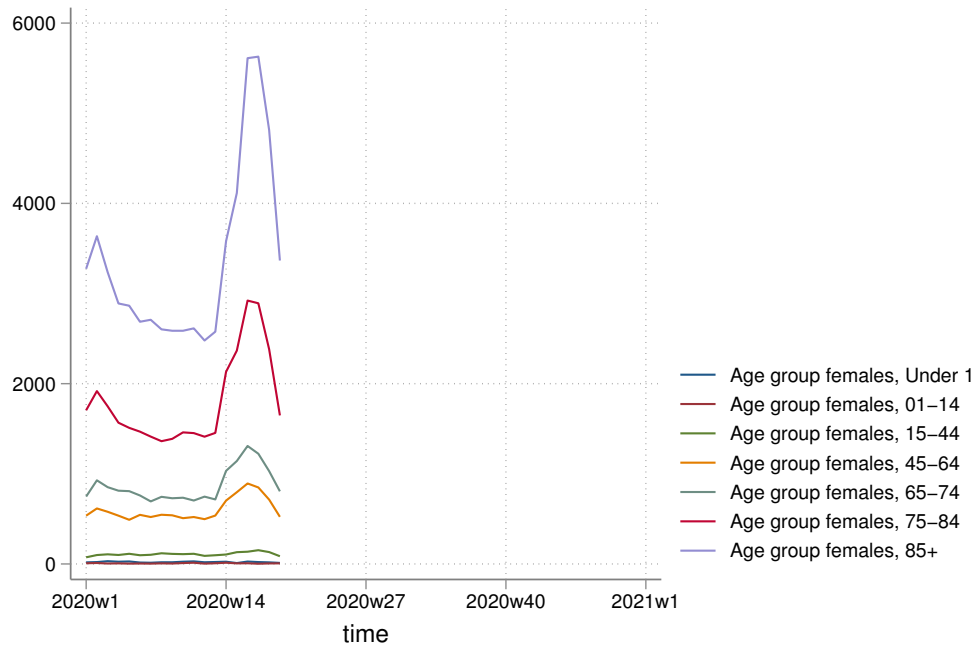

## 5.2 Females aged under 1

Figure 244: Females < 1 mortality time trend and model, fm 2010 wk1

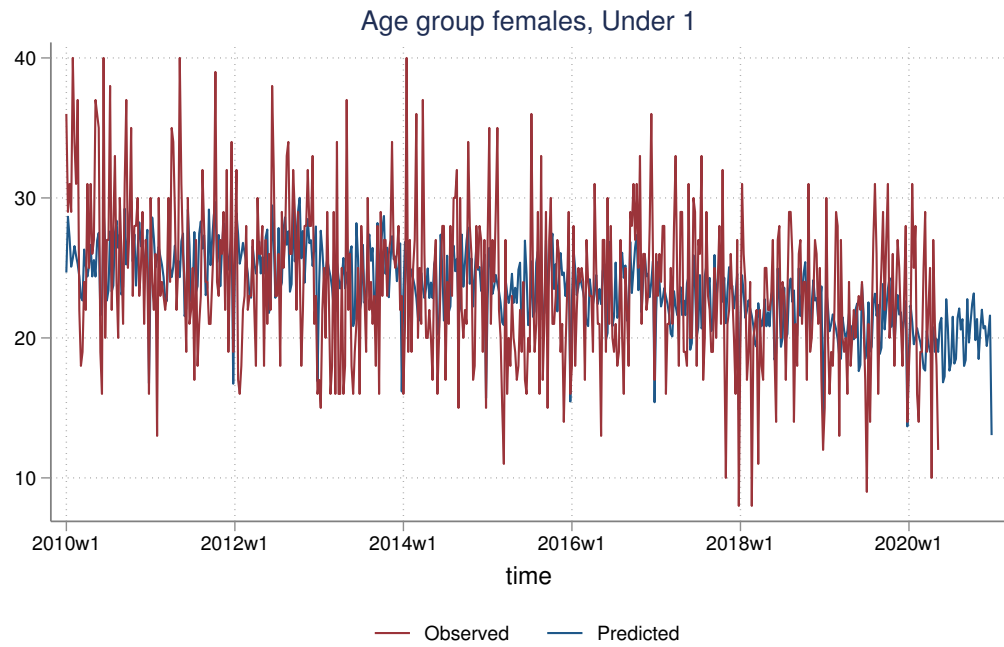

Figure 245: Females < 1 mortality time trend and model, fm 2019 wk1

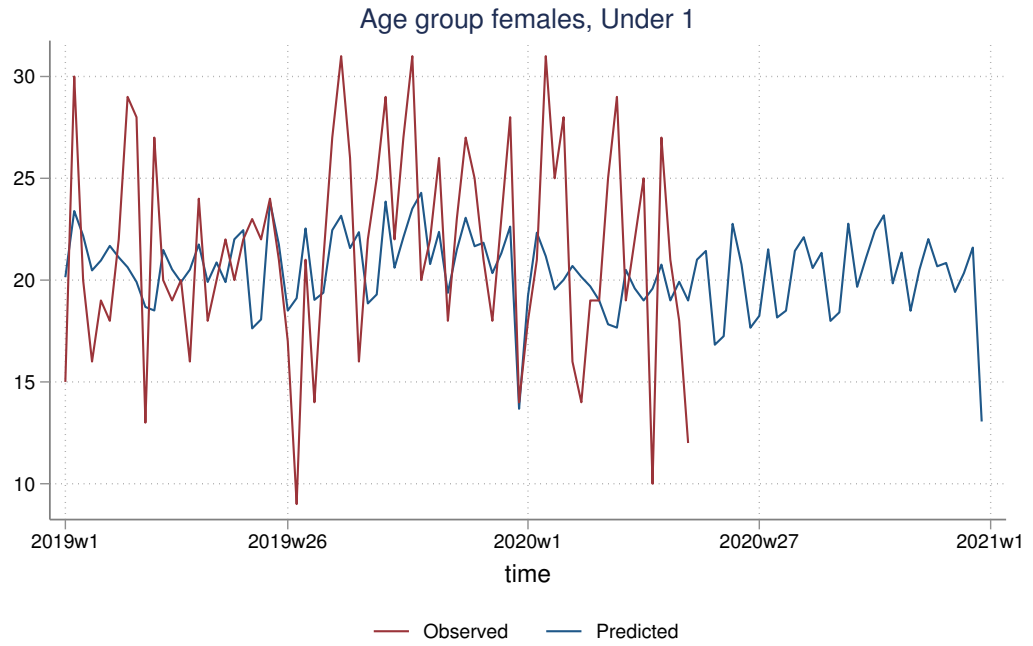

Figure 246: Females < 1 mortality time trend and model, fm 2020 wk1

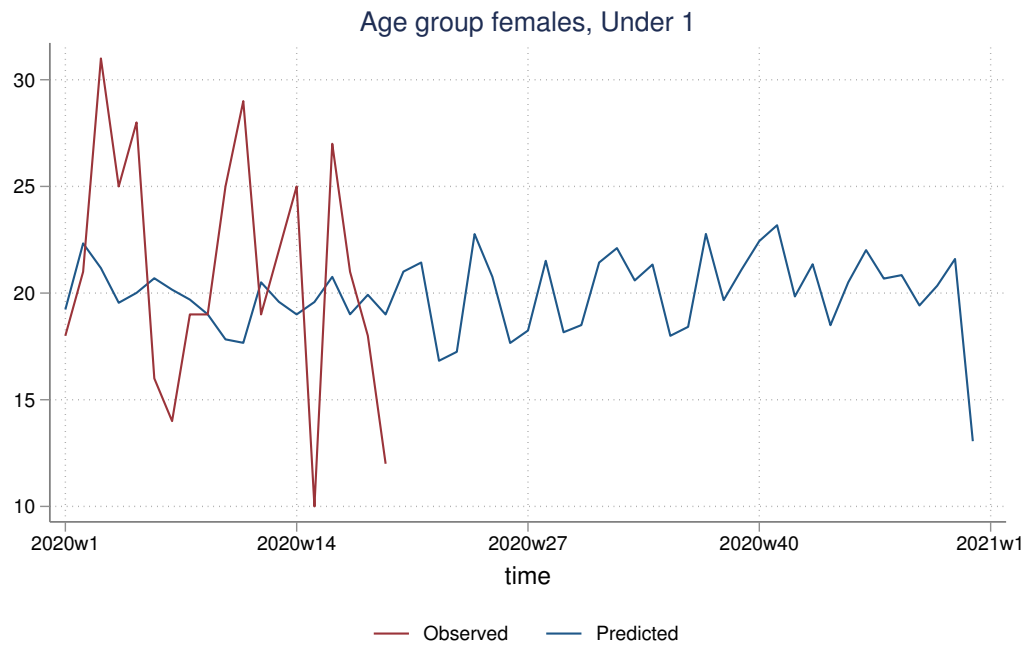

Figure 247: Females < 1 all-cause excess deaths, fm 2010 wk1

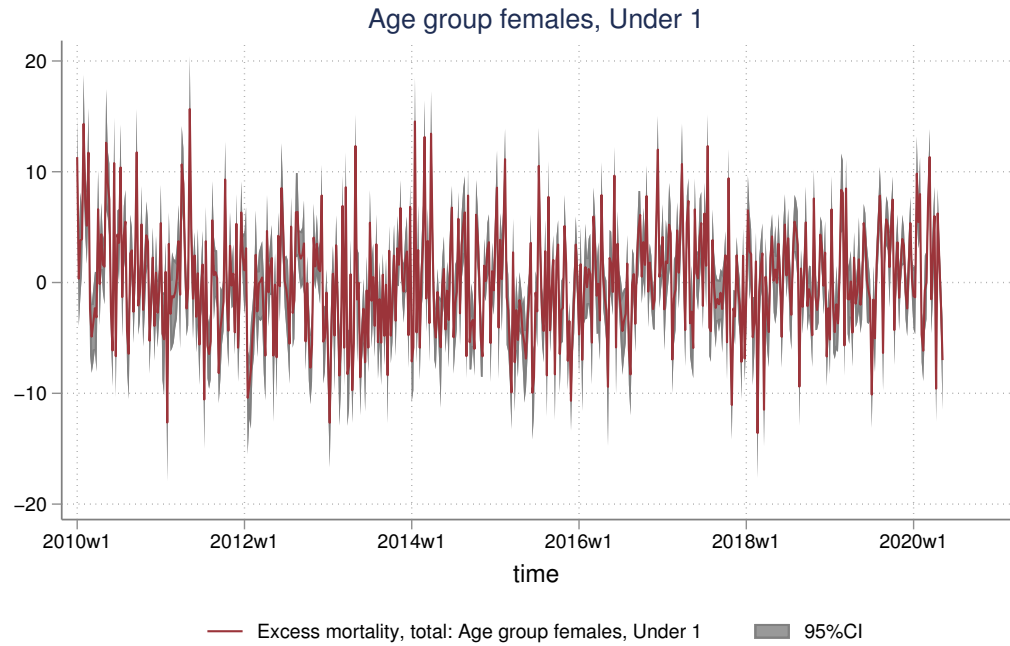

Figure 248: Females < 1 all-cause excess deaths, fm 2019 wk1

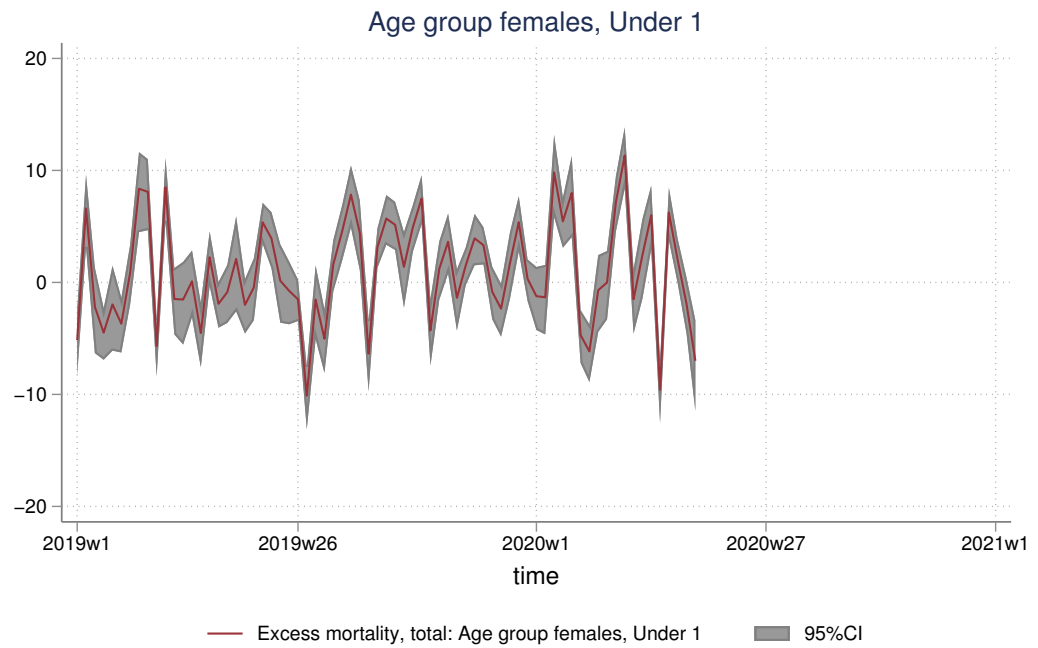

Figure 249: Females < 1 all-cause excess deaths, fm 2020 wk1

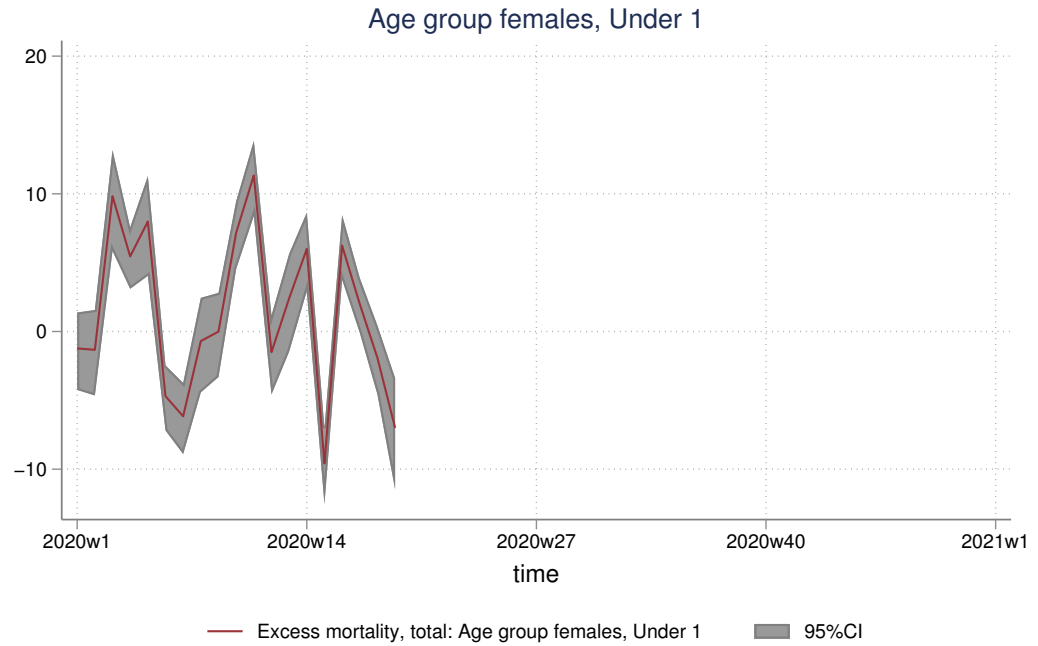

Figure 250: Females < 1 all-cause excess deaths minus COVID19, fm 2010 wk1

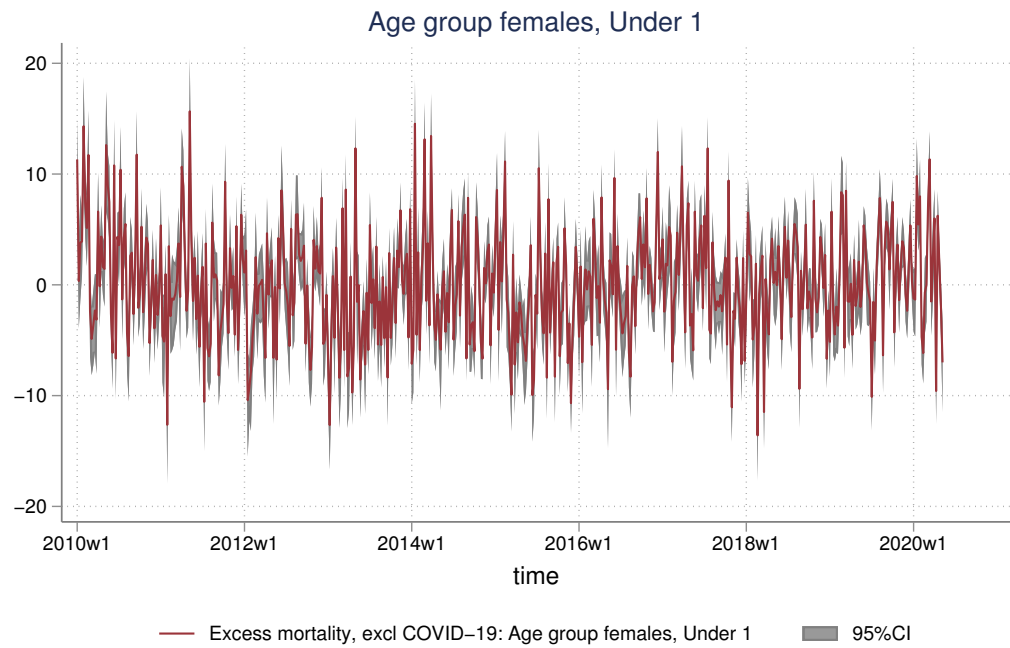

Figure 251: Females < 1 all-cause excess deaths minus COVID19, fm 2019 wk1

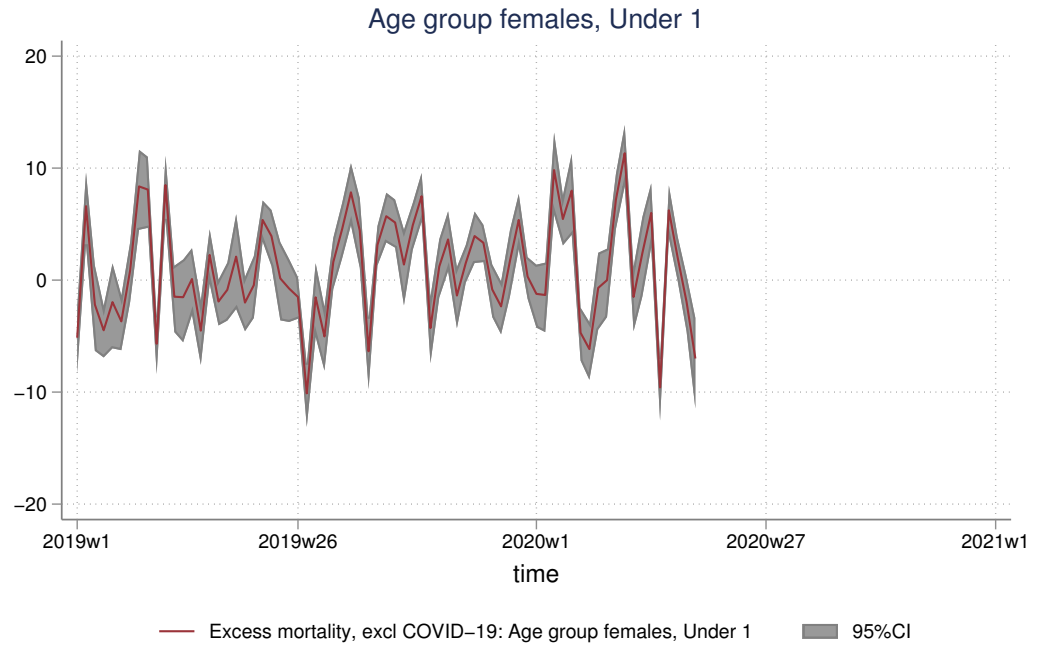

Figure 252: Females < 1 all-cause excess deaths minus COVID19, fm 2020 wk1

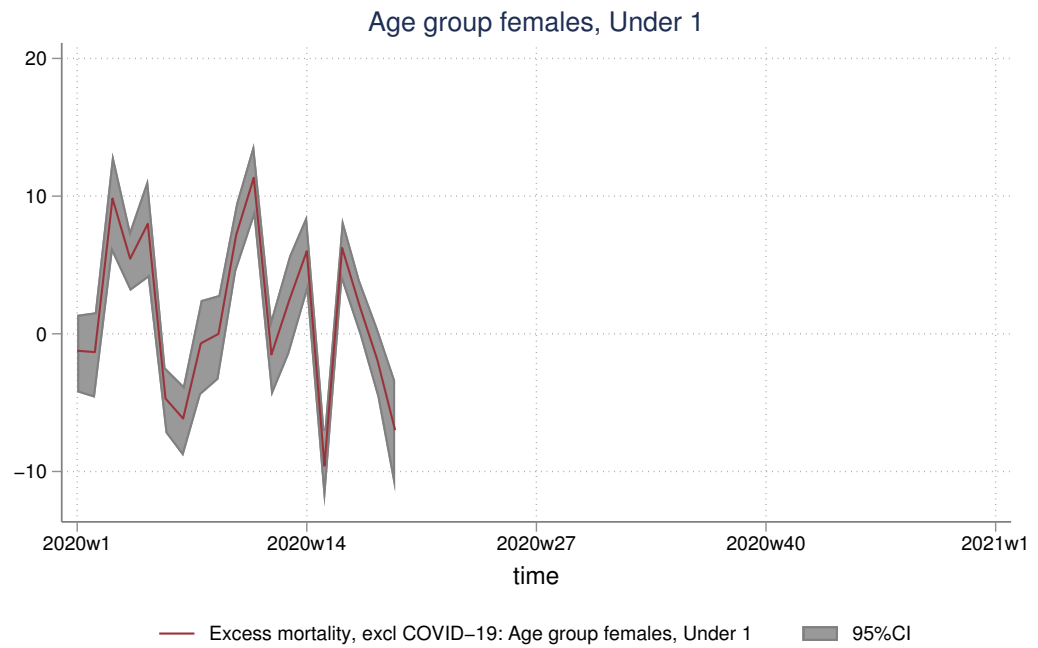

### 5.3 Females aged 01-14

Figure 253: Females 01-14 mortality time trend and model, fm 2010 wk1

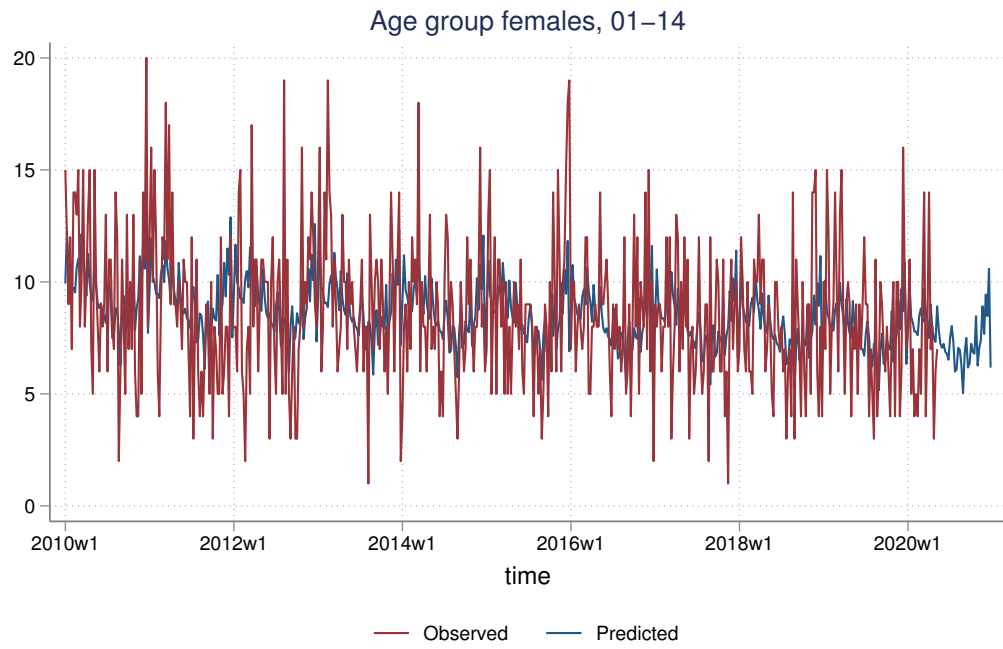

Figure 254: Females 01-14 mortality time trend and model, fm 2019 wk1

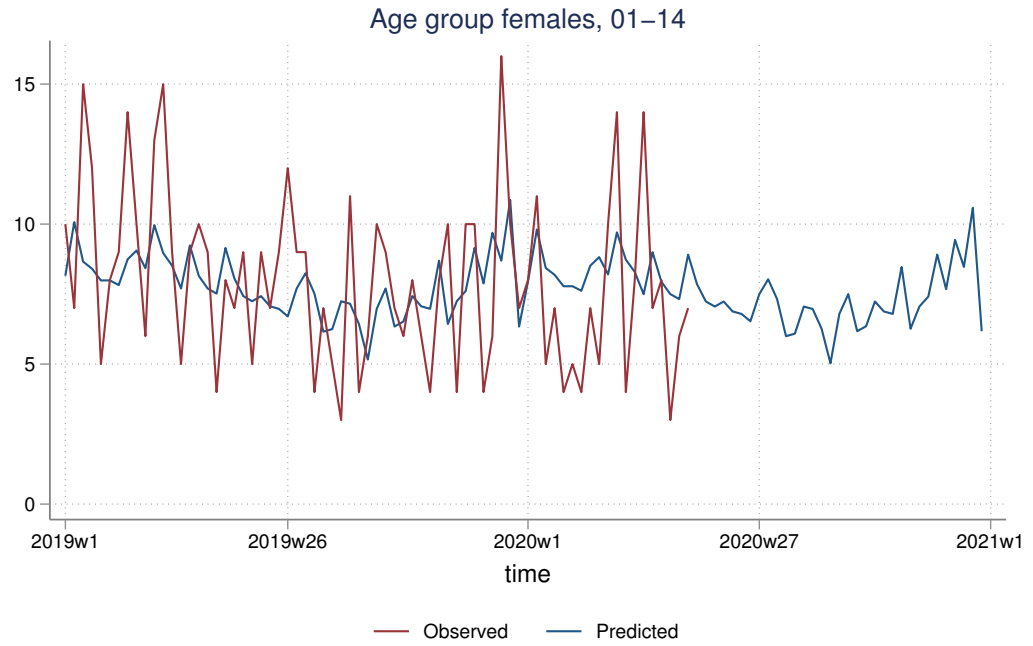

Figure 255: Females 01-14 mortality time trend and model, fm 2020 wk1

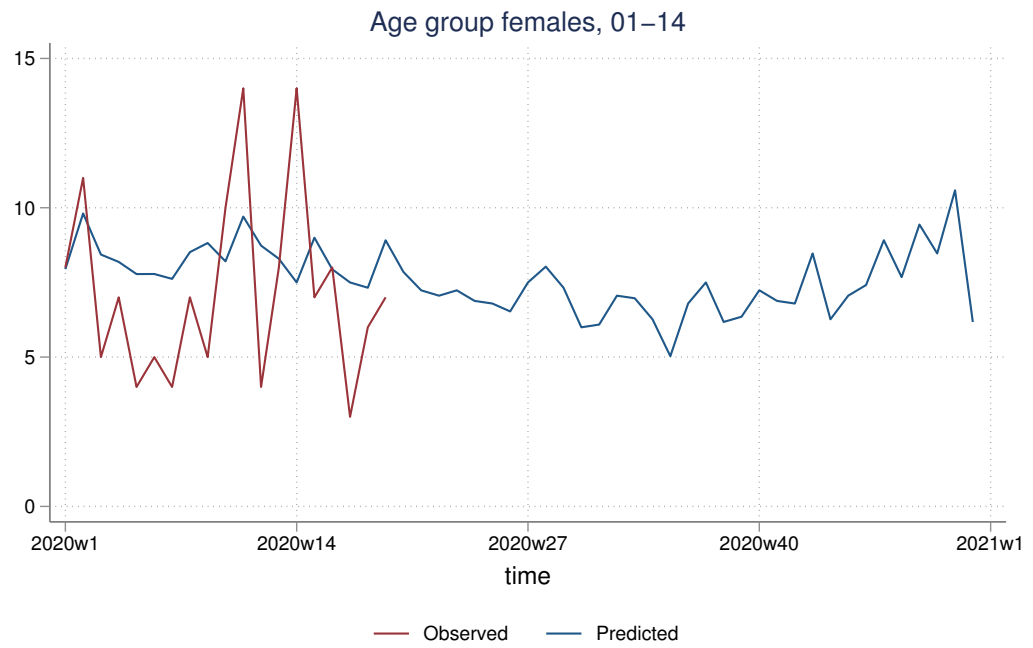



Figure 256: Females 01-14 all-cause excess deaths, fm 2010 wk1

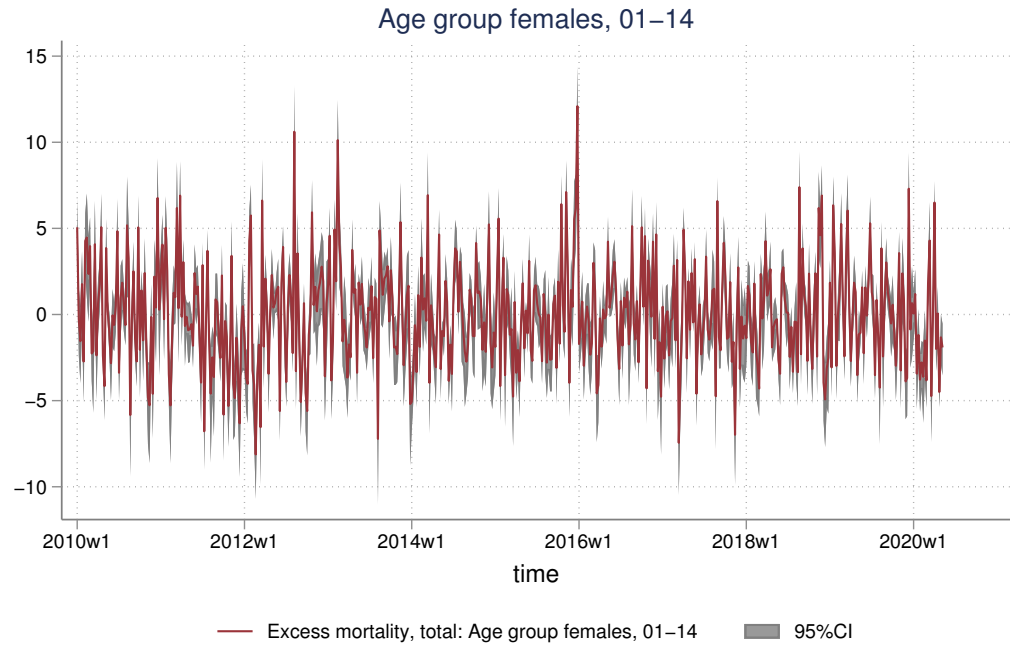

Figure 257: Females 01-14 all-cause excess deaths, fm 2019 wk1

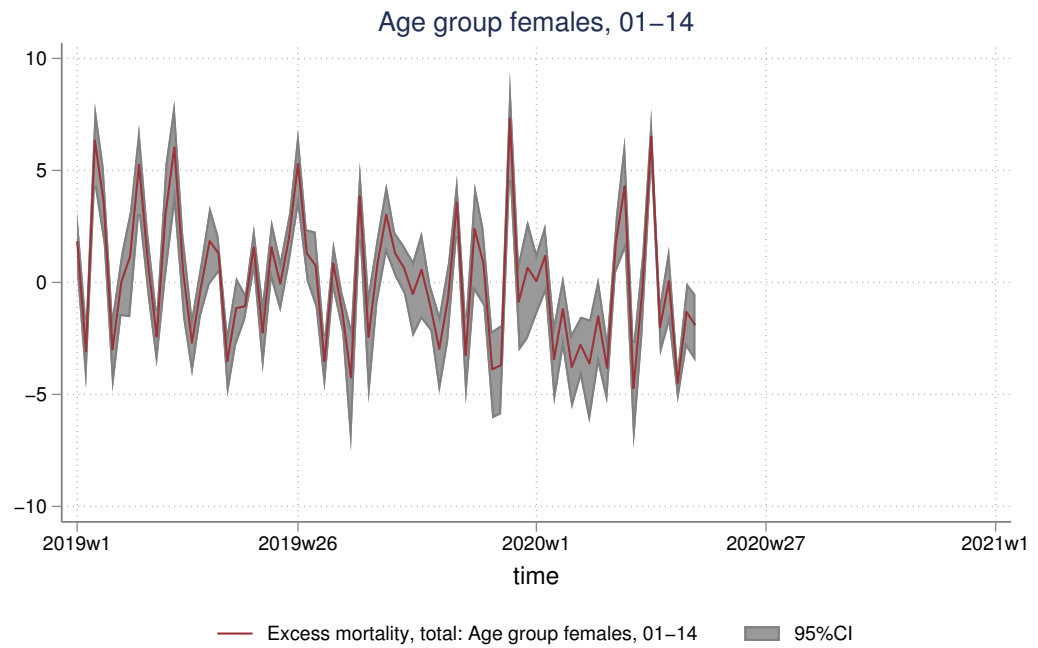

Figure 258: Females 01-14 all-cause excess deaths, fm 2020 wk1

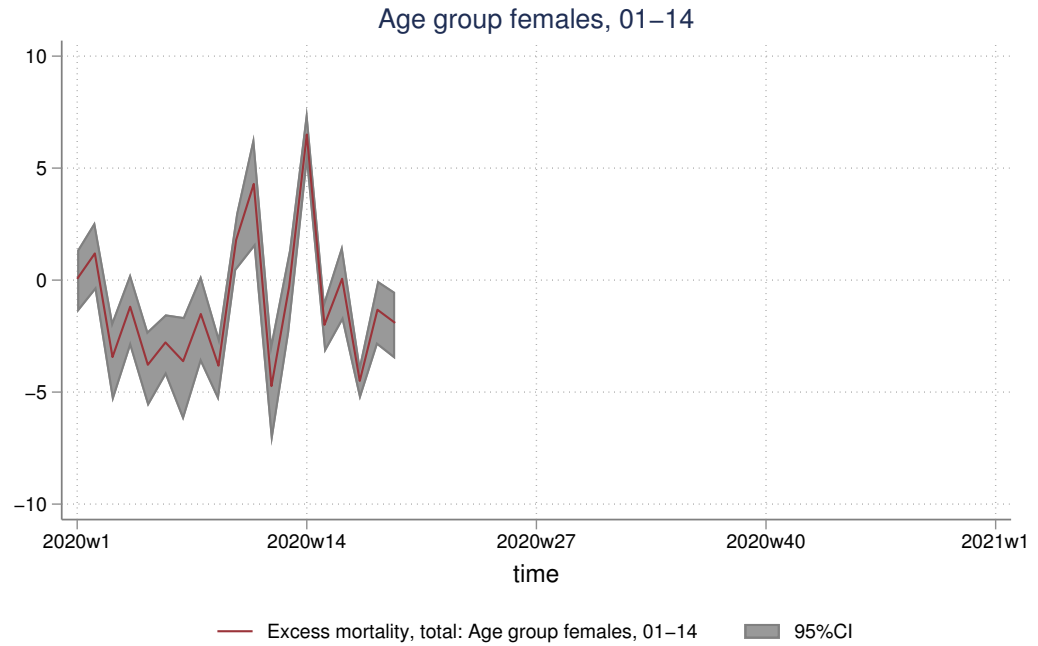

Figure 259: Females 01-14 all-cause excess deaths (-COVID19), fm 2010 wk1

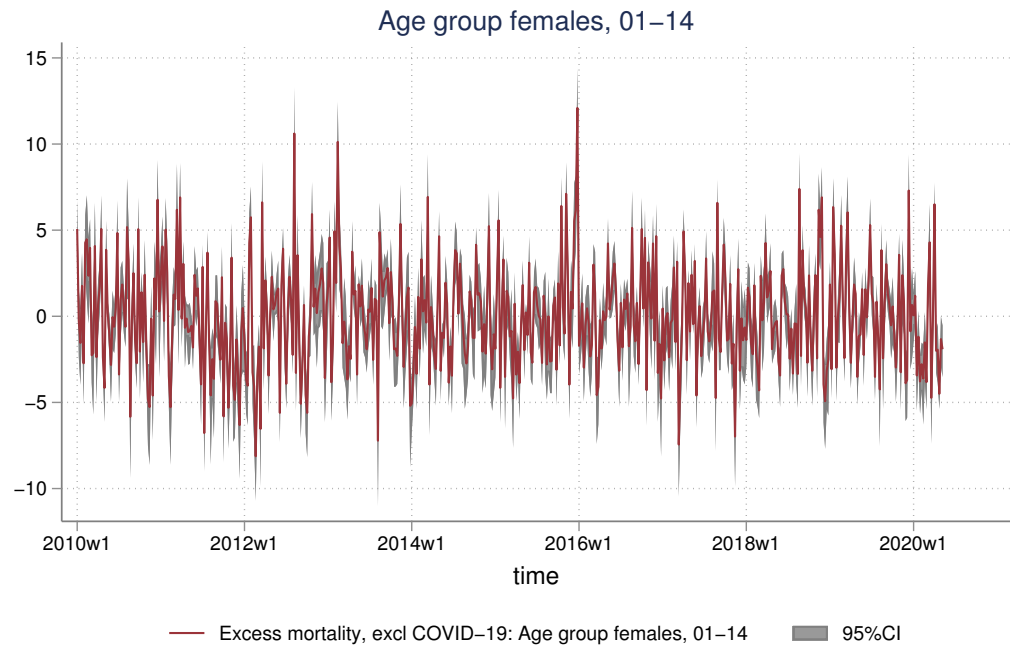

Figure 260: Females 01-14 all-cause excess deaths (-COVID19), fm 2019 wk1

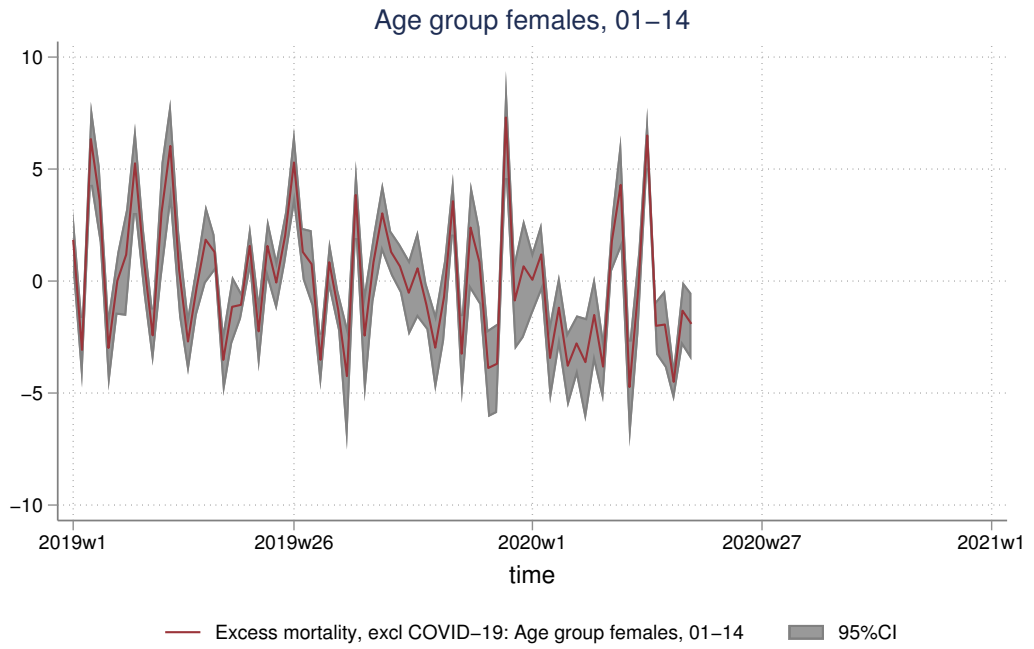

Figure 261: Females 01-14 all-cause excess deaths (-COVID19), fm 2020 wk1

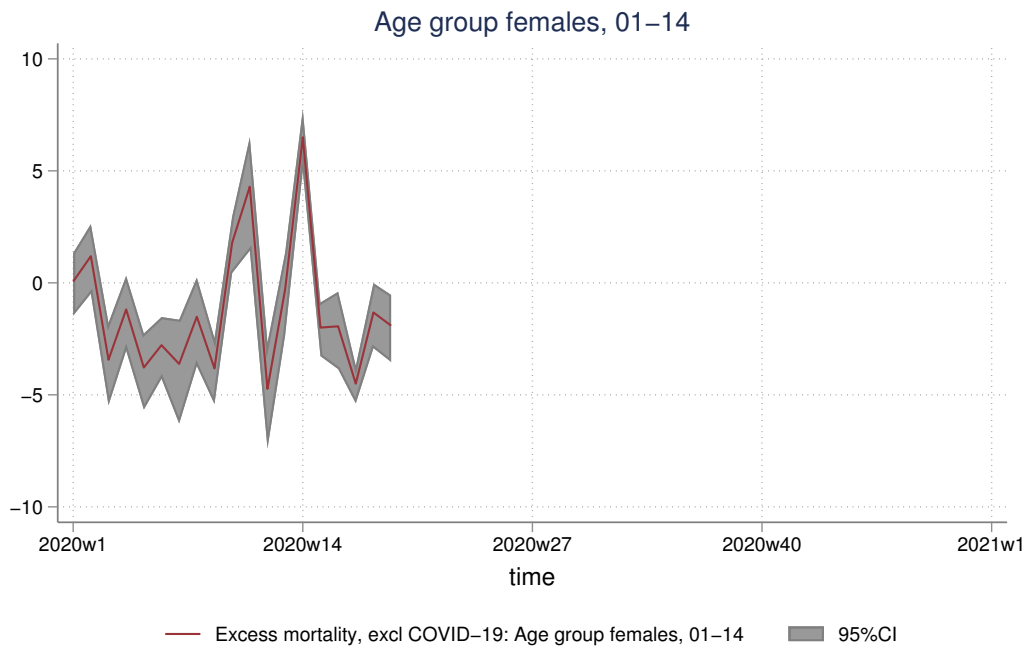

## 5.4 Females aged 15-44

Figure 262: Females 15-44 mortality time trend and model, fm 2010 wk1

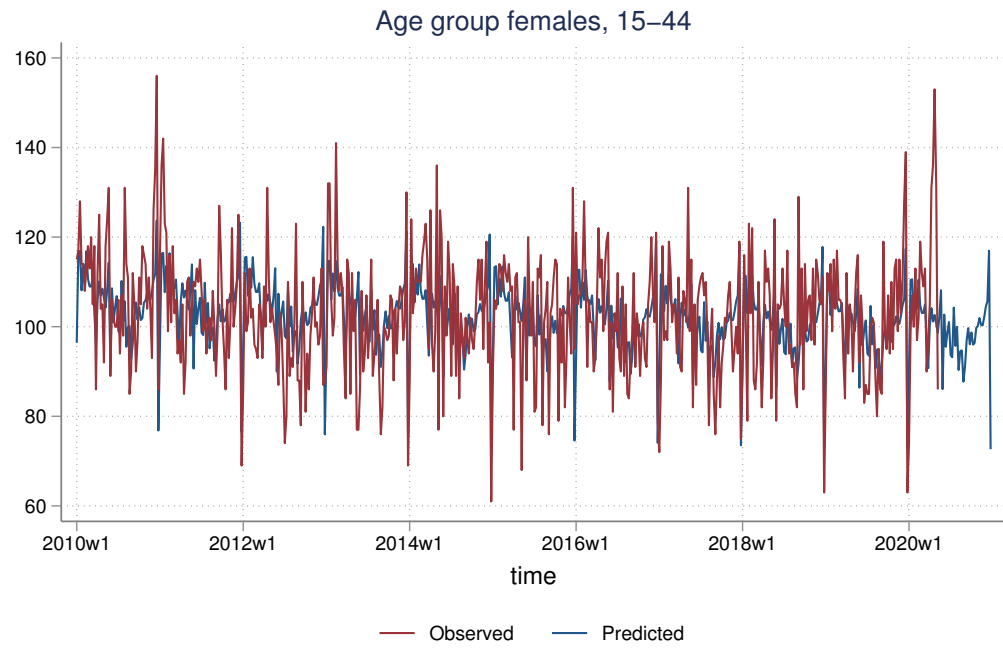

Figure 263: Females 15-44 mortality time trend and model, fm 2019 wk1

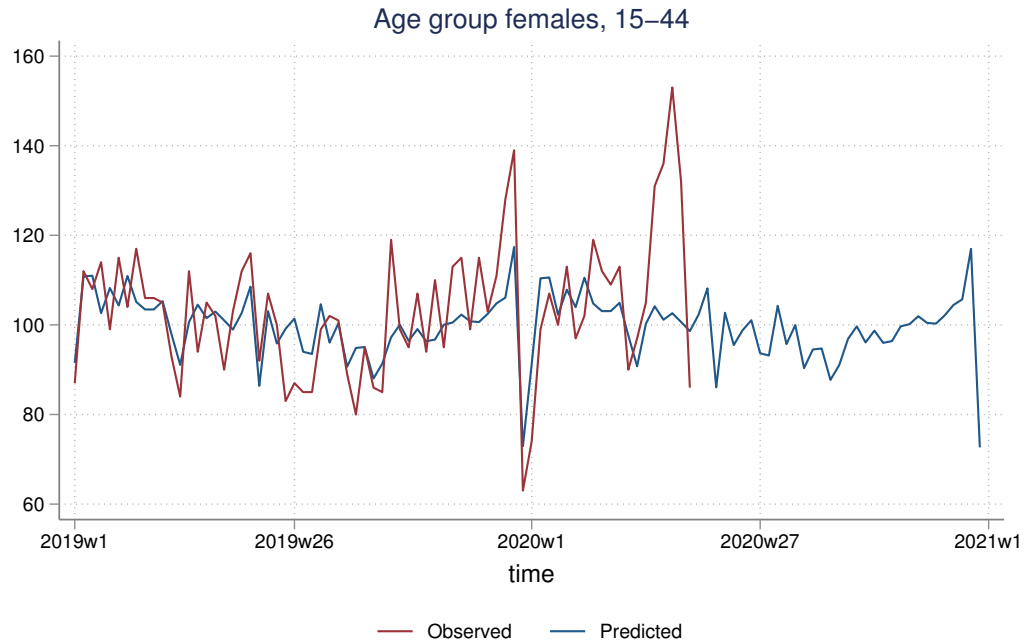

Figure 264: Females 15-44 mortality time trend and model, fm 2020 wk1

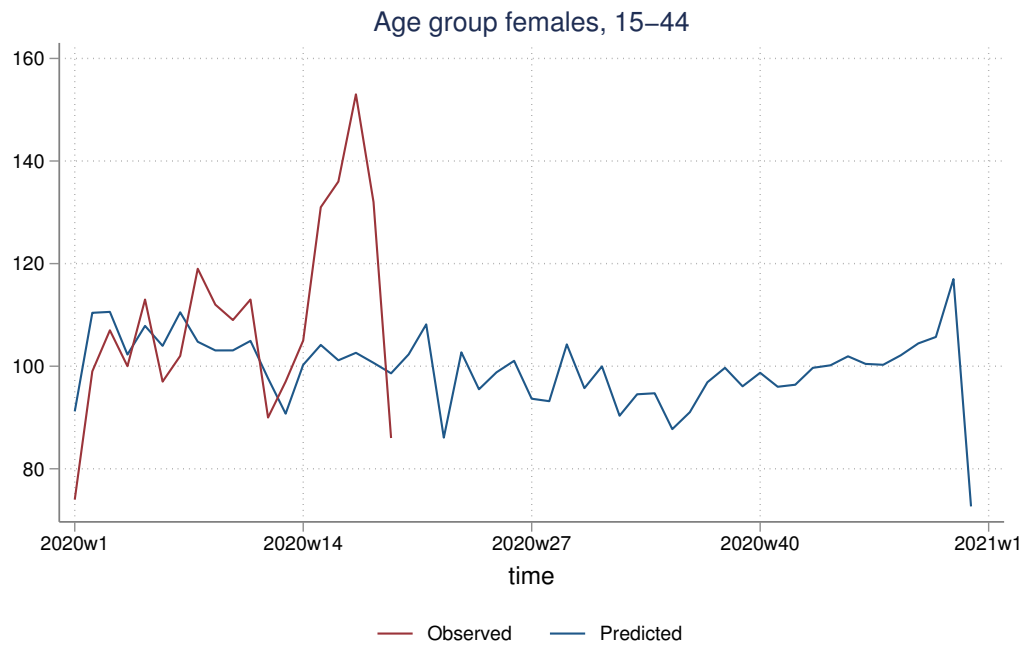

Figure 265: Females 15-44 all-cause excess deaths, fm 2010 wk1

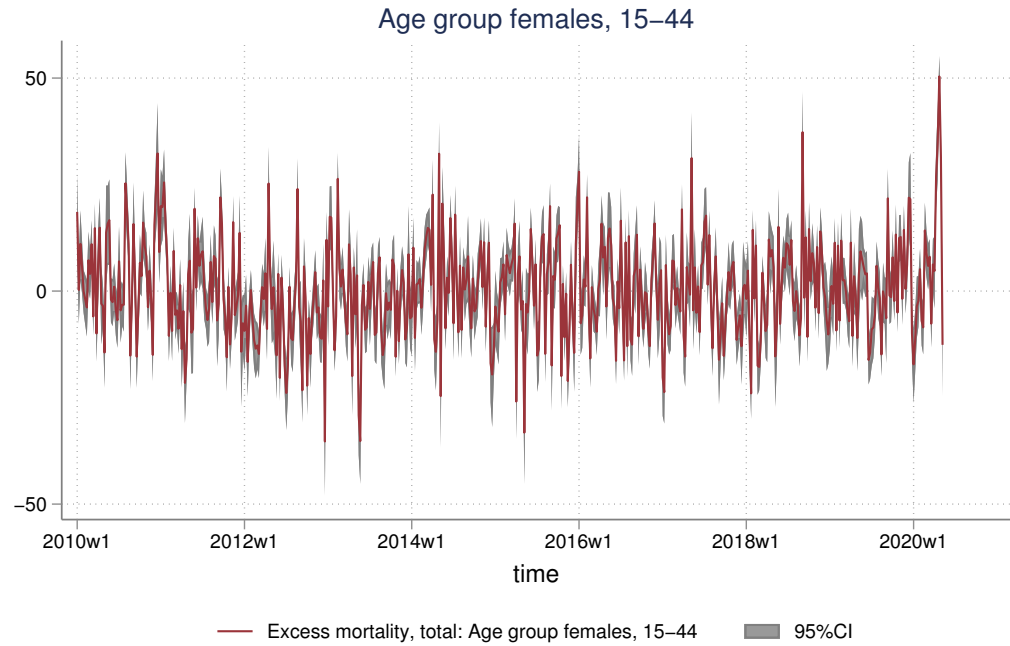

Figure 266: Females 15-44 all-cause excess deaths, fm 2019 wk1

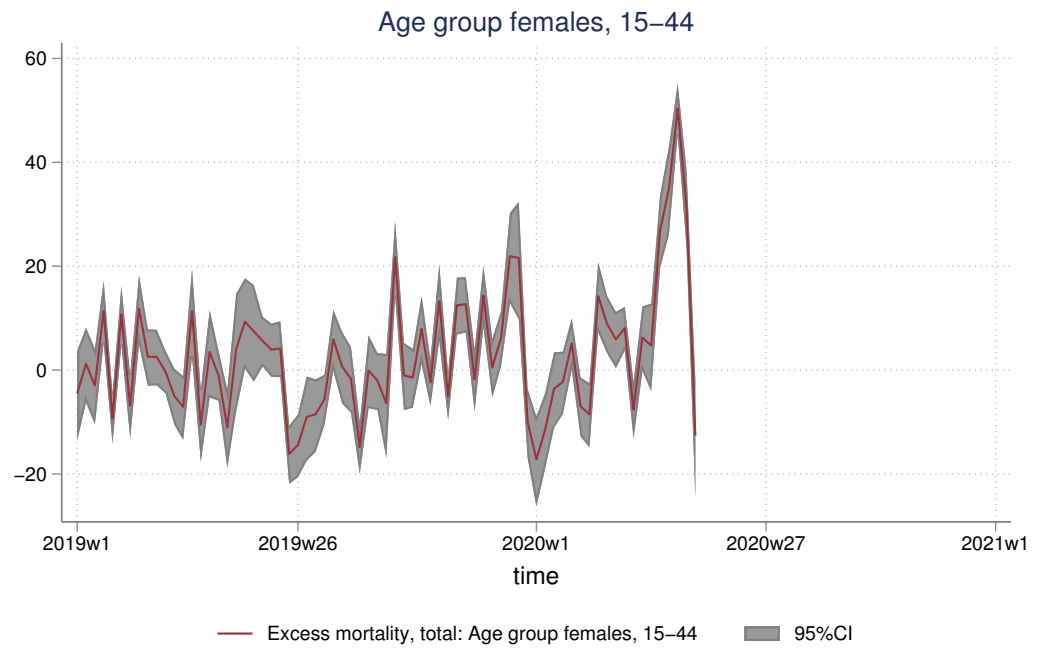

Figure 267: Females 15-44 all-cause excess deaths, fm 2020 wk1

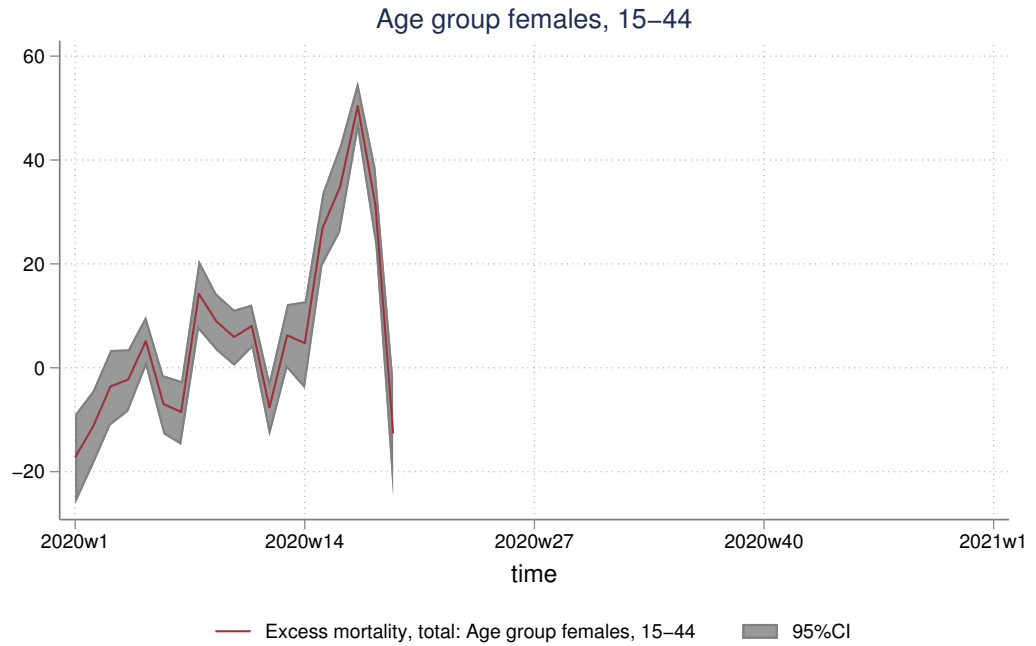

Figure 268: Females 15-44 all-cause excess deaths (-COVID19), fm 2010 wk1

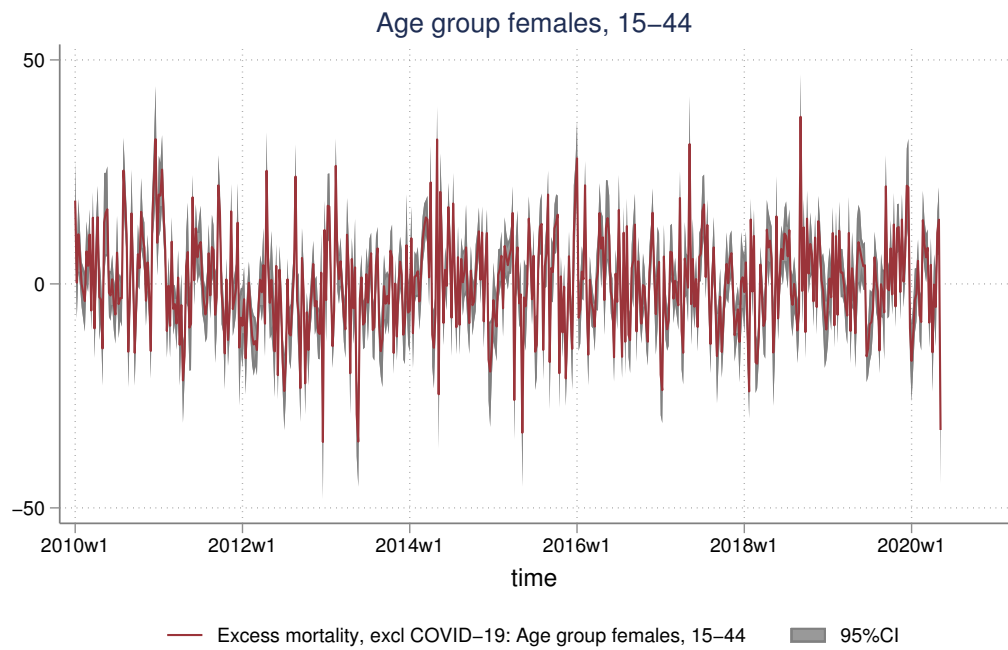

Figure 269: Females 15-44 all-cause excess deaths (-COVID19), fm 2019 wk1

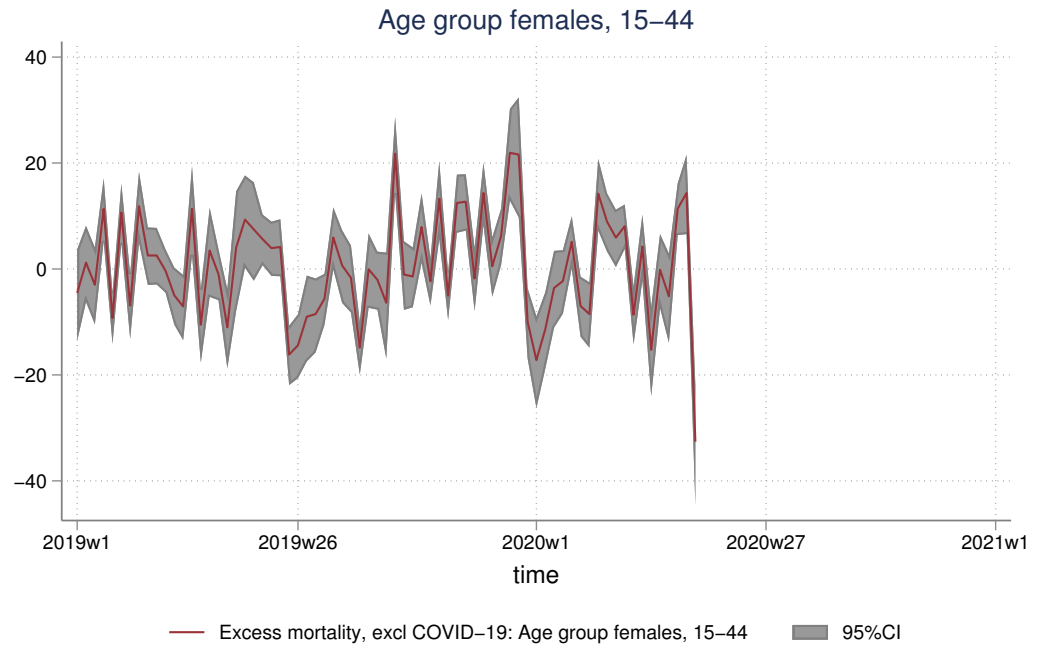

Figure 270: Females 15-44 all-cause excess deaths (-COVID19), fm 2020 wk1

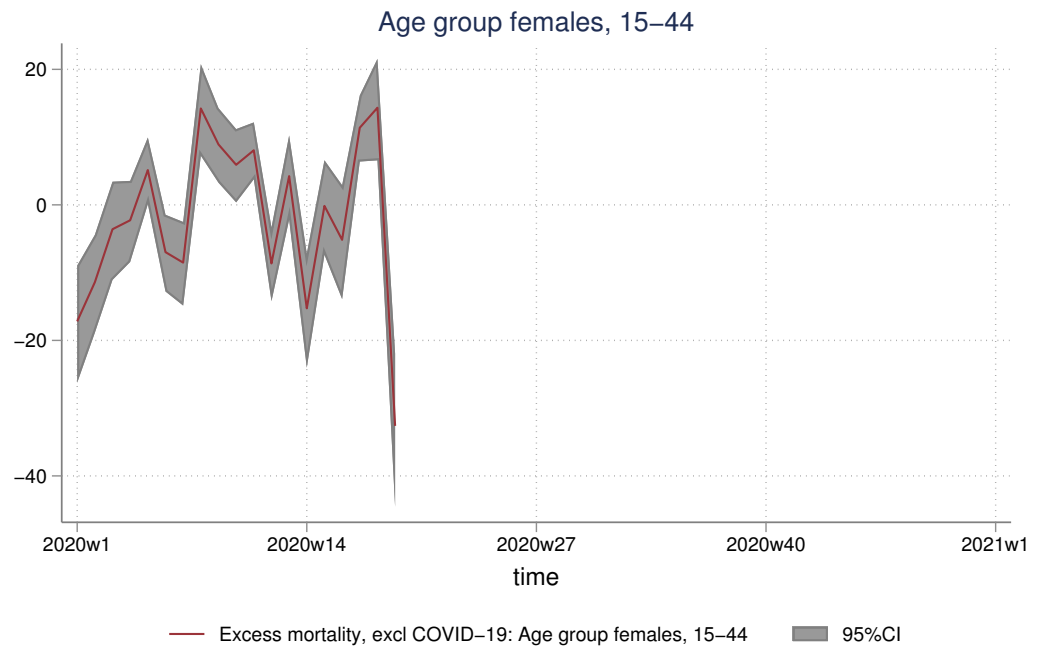



## 5.5 Females aged 45-64

Figure 271: Females 45-64 mortality time trend and model, fm 2010 wk1

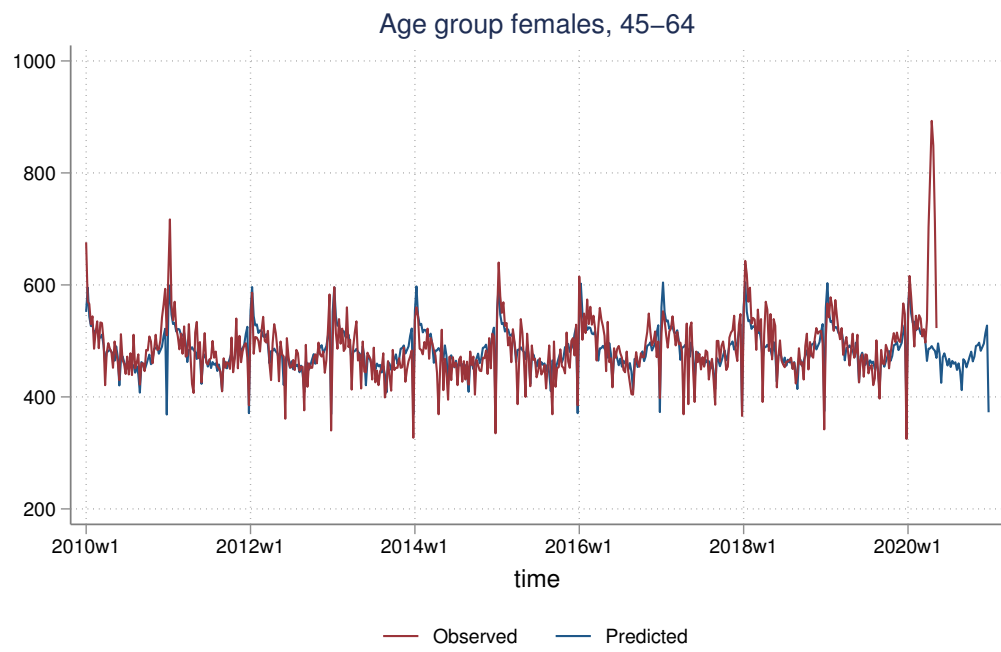

Figure 272: Females 45-64 mortality time trend and model, fm 2019 wk1

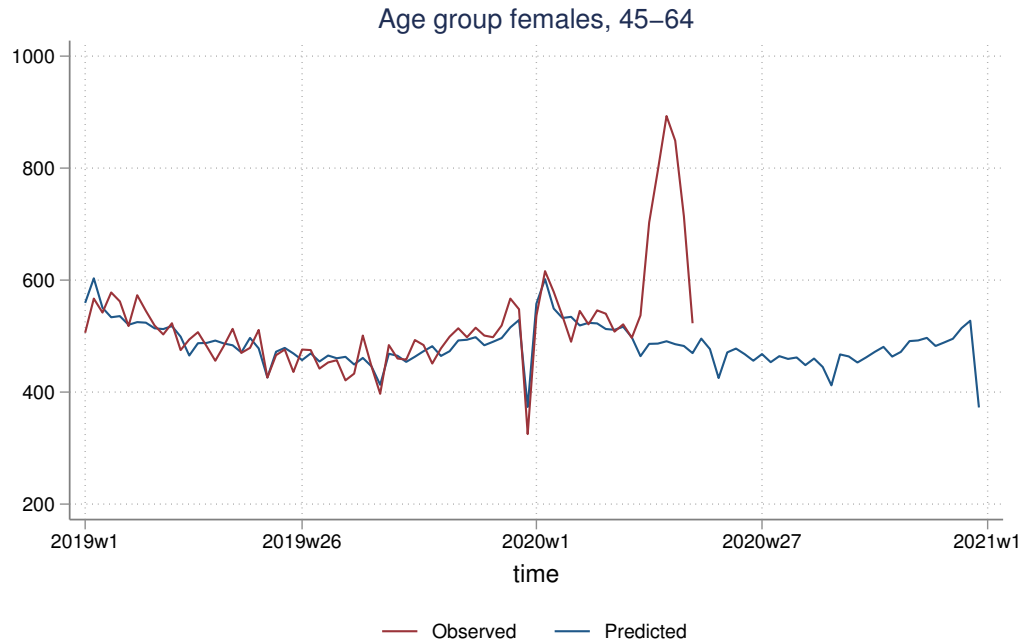

Figure 273: Females 45-64 mortality time trend and model, fm 2020 wk1

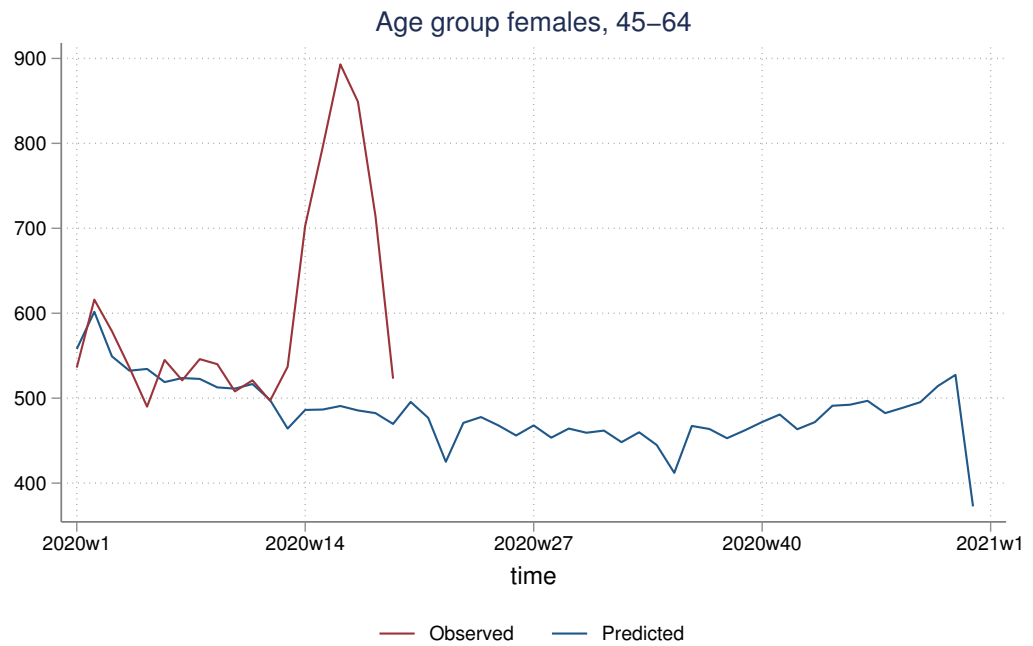

Figure 274: Females 45-64 all-cause excess deaths, fm 2010 wk1

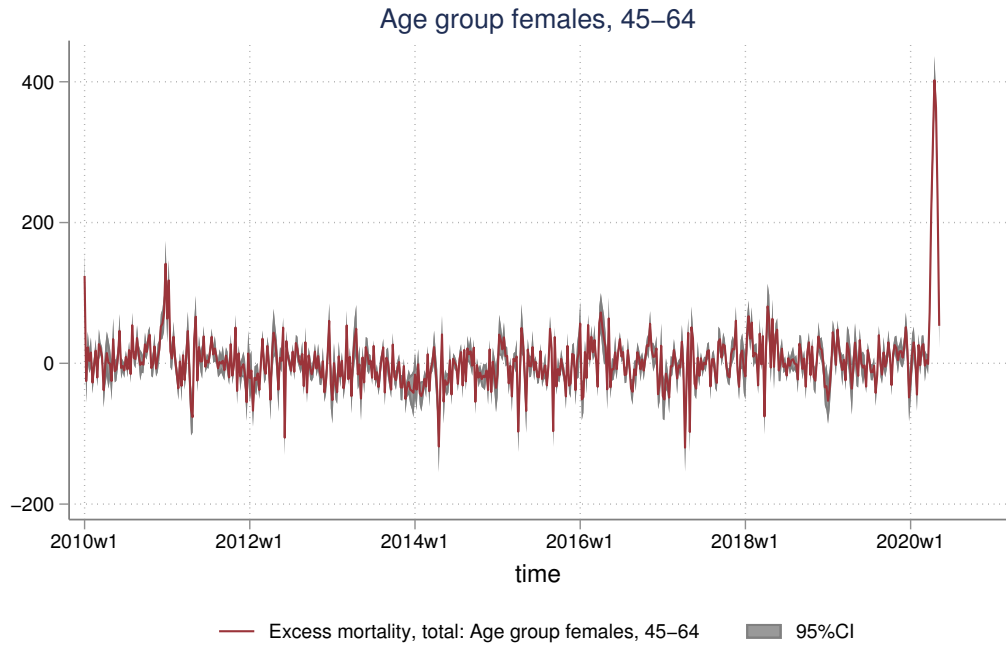

Figure 275: Females 45-64 all-cause excess deaths, fm 2019 wk1

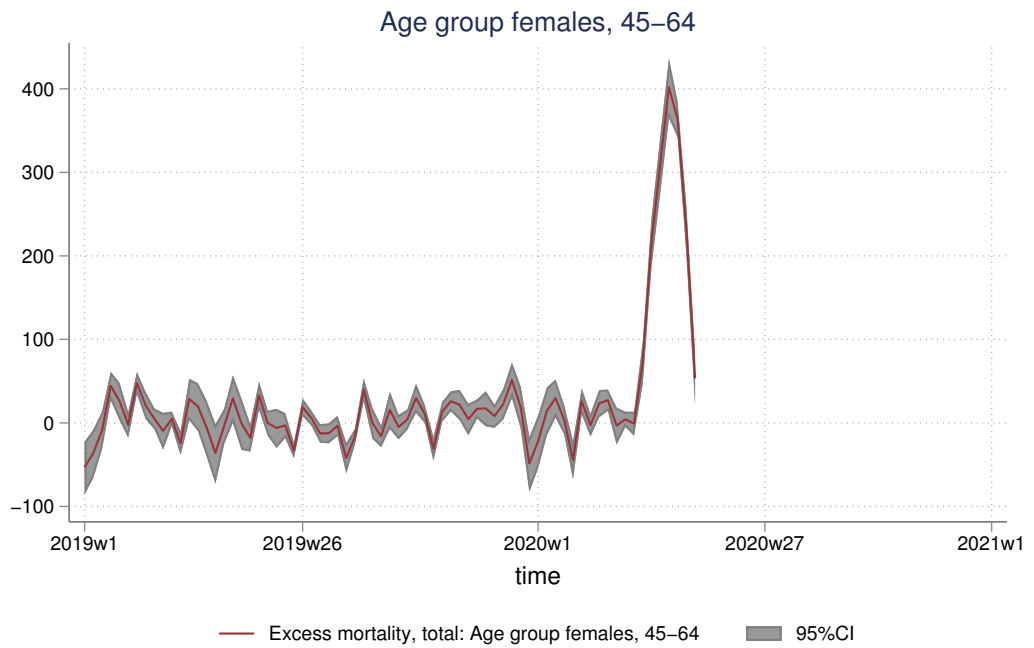

Figure 276: Females 45-64 all-cause excess deaths, fm 2020 wk1

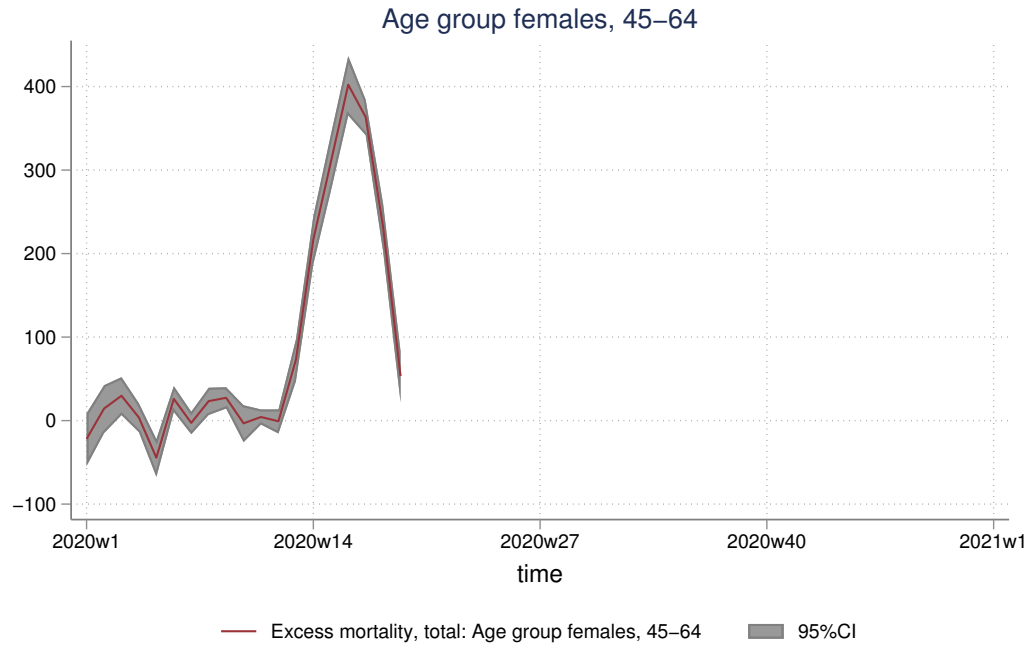

Figure 277: Females 45-64 all-cause excess deaths (-COVID19), fm 2010 wk1

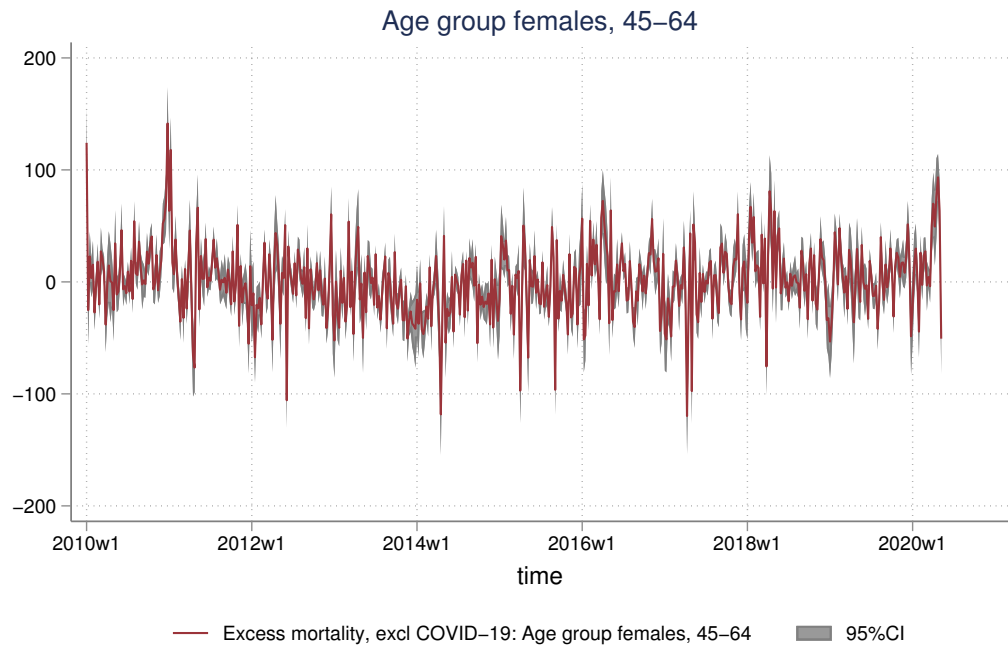

Figure 278: Females 45-64 all-cause excess deaths (-COVID19), fm 2019 wk1

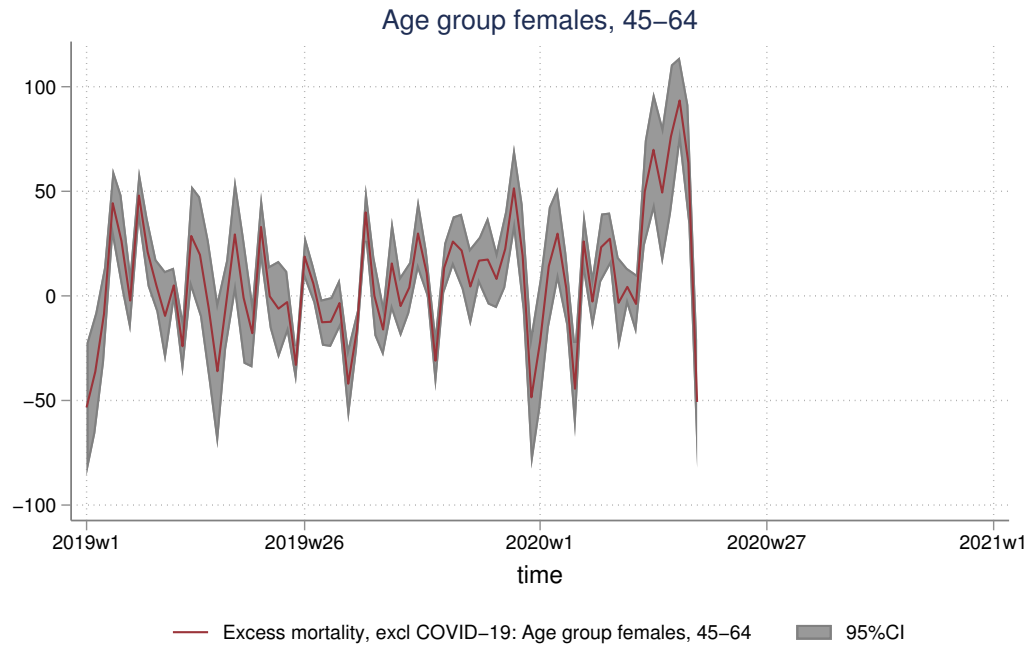

Figure 279: Females 45-64 all-cause excess deaths (-COVID19), fm 2020 wk1

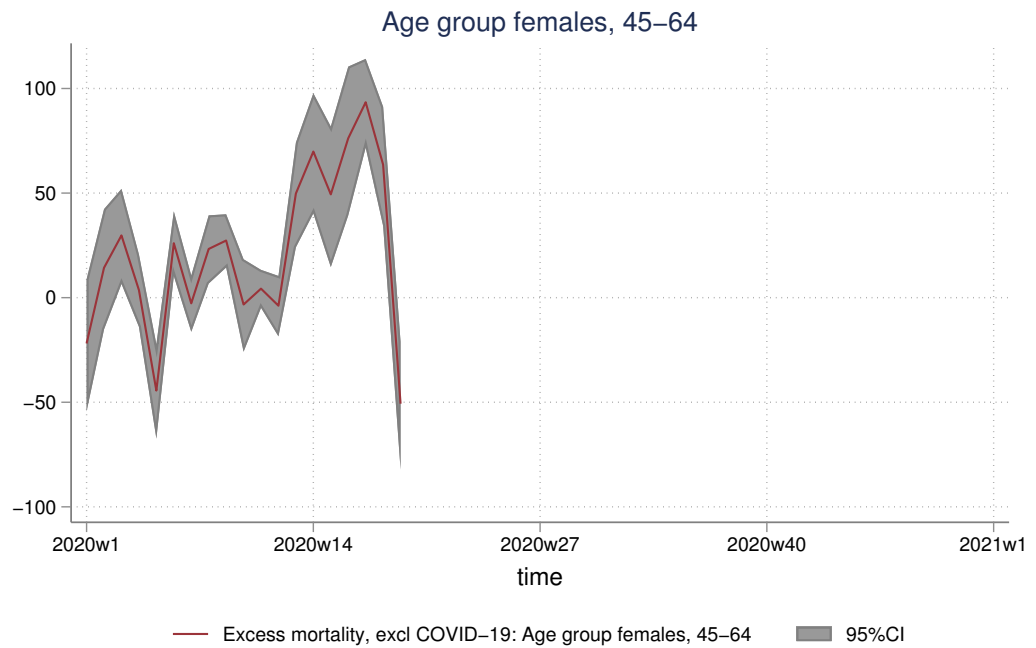

## 5.6 Females aged 65-74

Figure 280: Females 65-74 mortality time trend and model, fm 2010 wk1

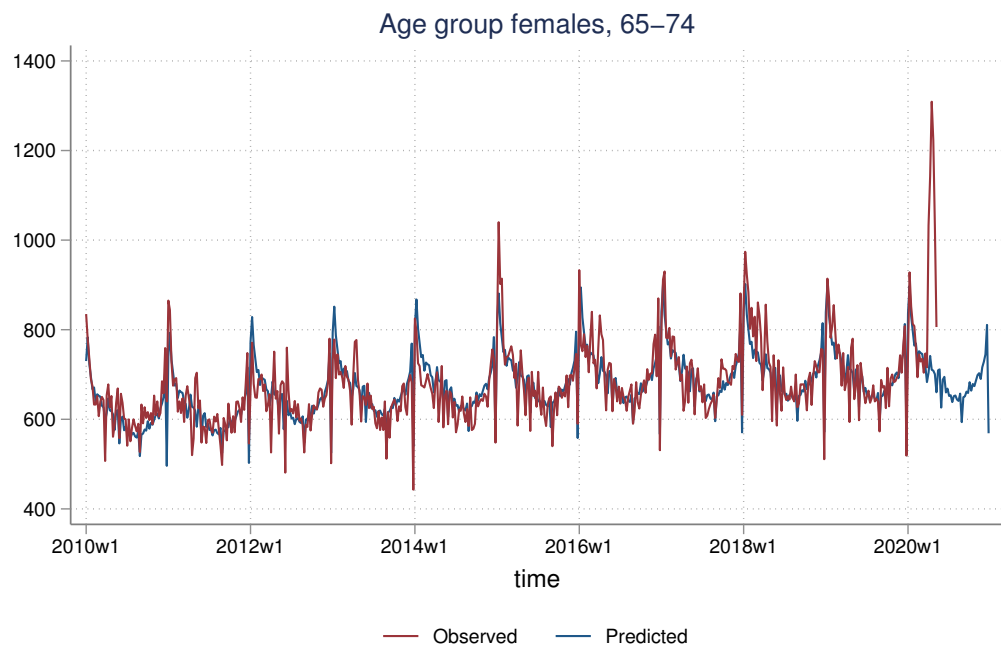

Figure 281: Females 65-74 mortality time trend and model, fm 2019 wk1

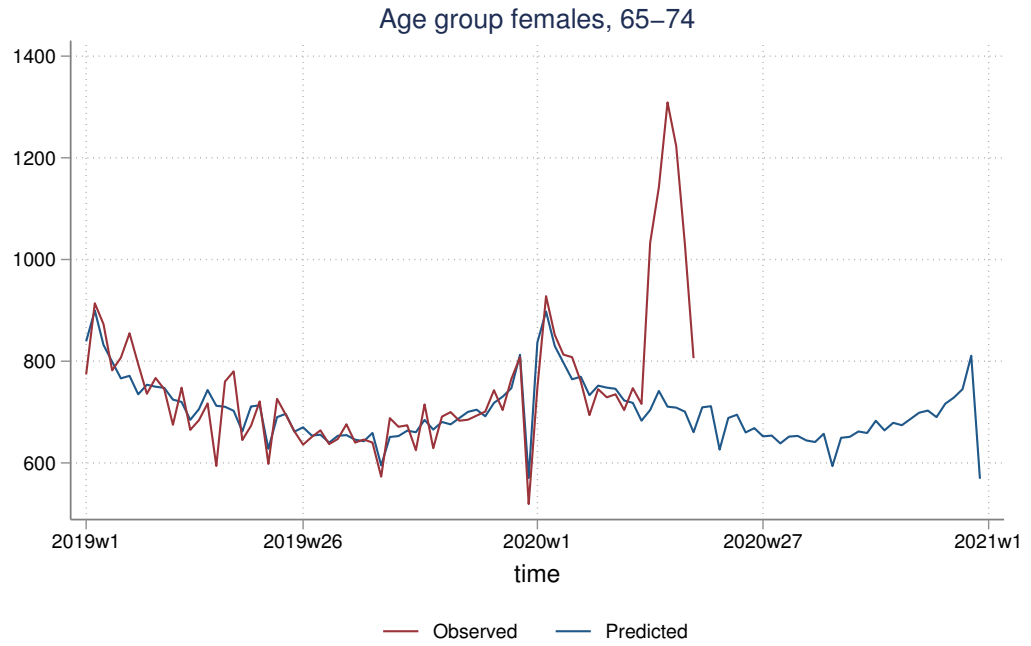

Figure 282: Females 65-74 mortality time trend and model, fm 2020 wk1

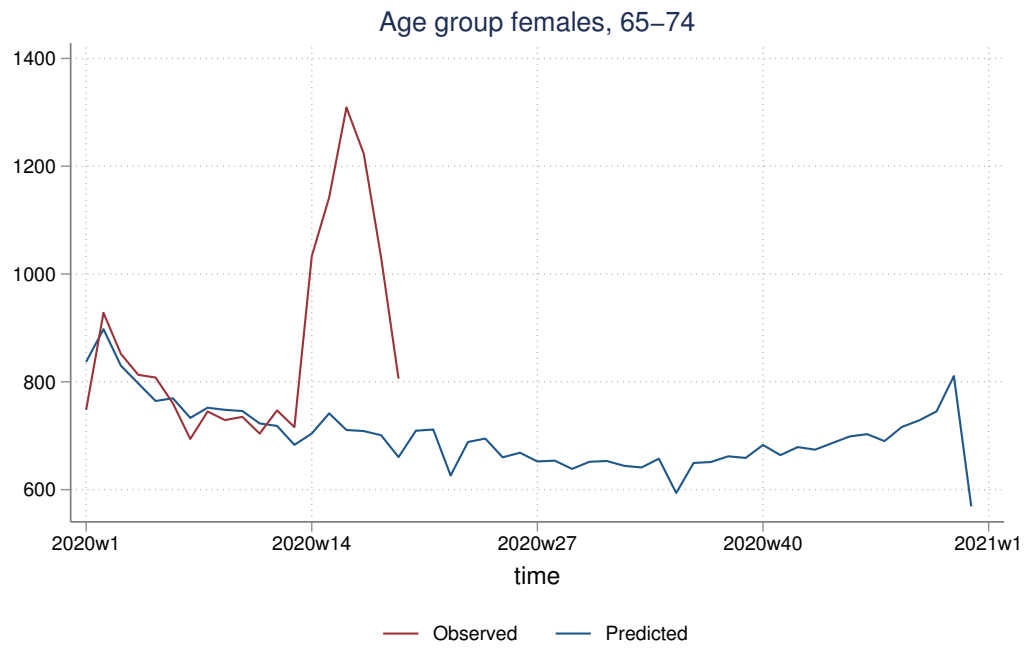

Figure 283: Females 65-74 all-cause excess deaths, fm 2010 wk1

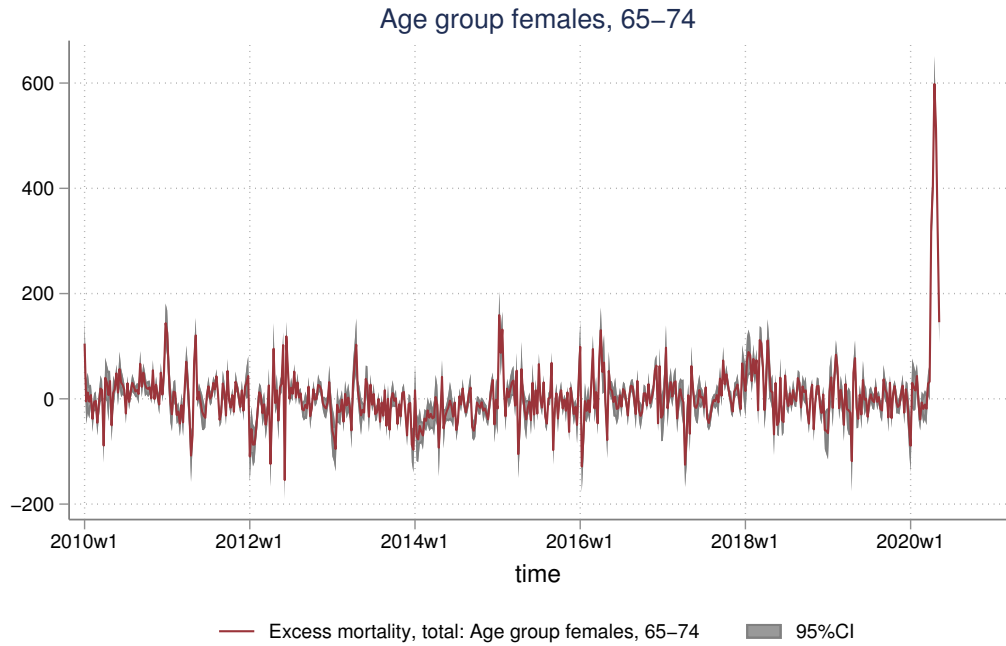

Figure 284: Females 65-74 all-cause excess deaths, fm 2019 wk1

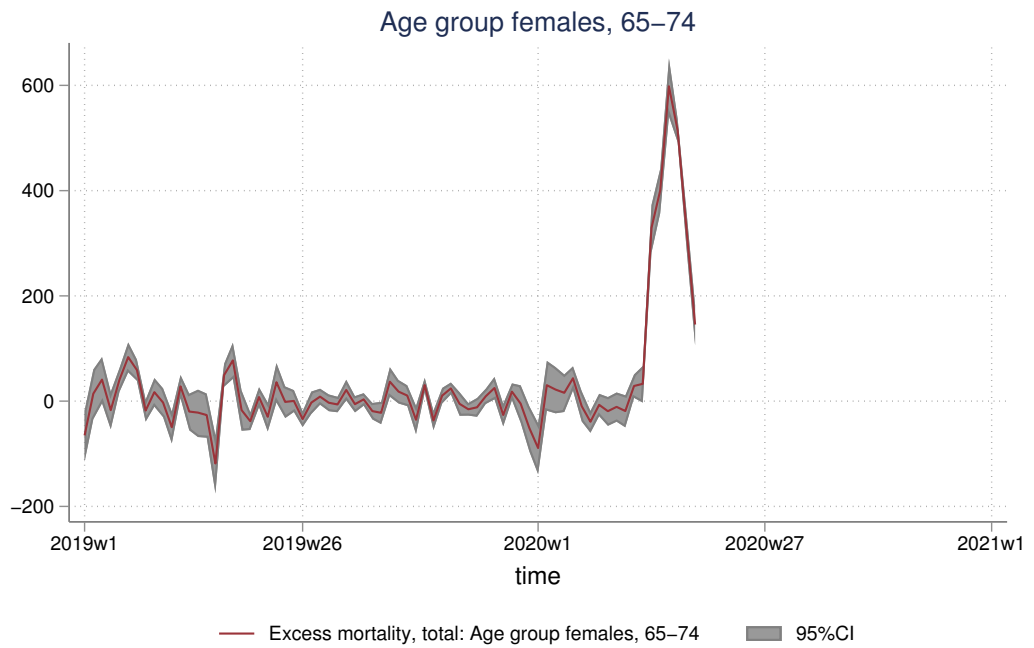



Figure 285: Females 65-74 all-cause excess deaths, fm 2020 wk1

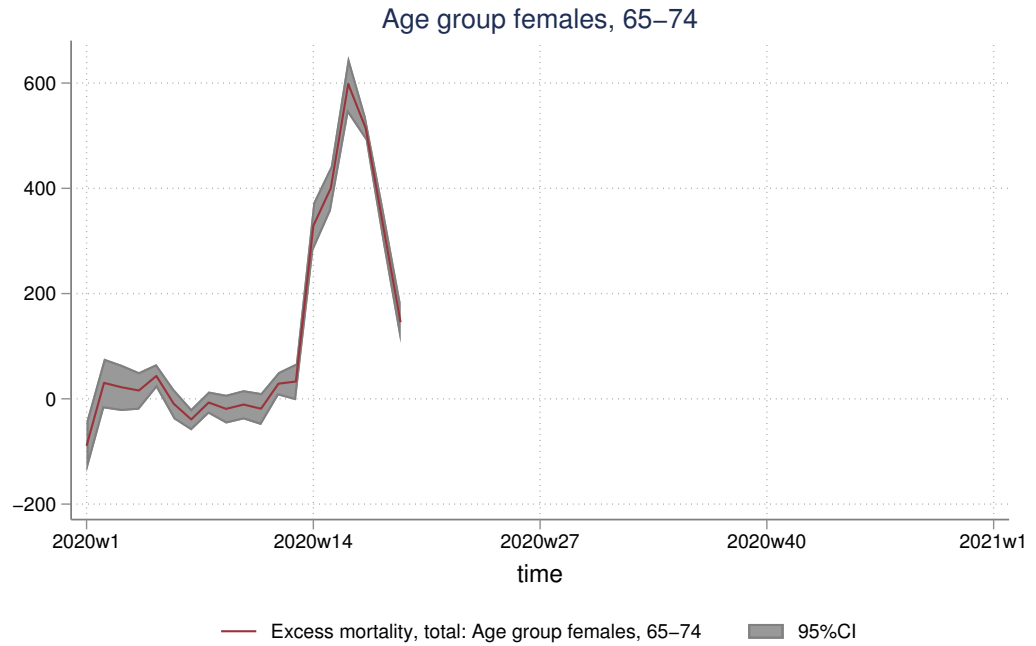

Figure 286: Females 65-74 all-cause excess deaths (-COVID19), fm 2010 wk1

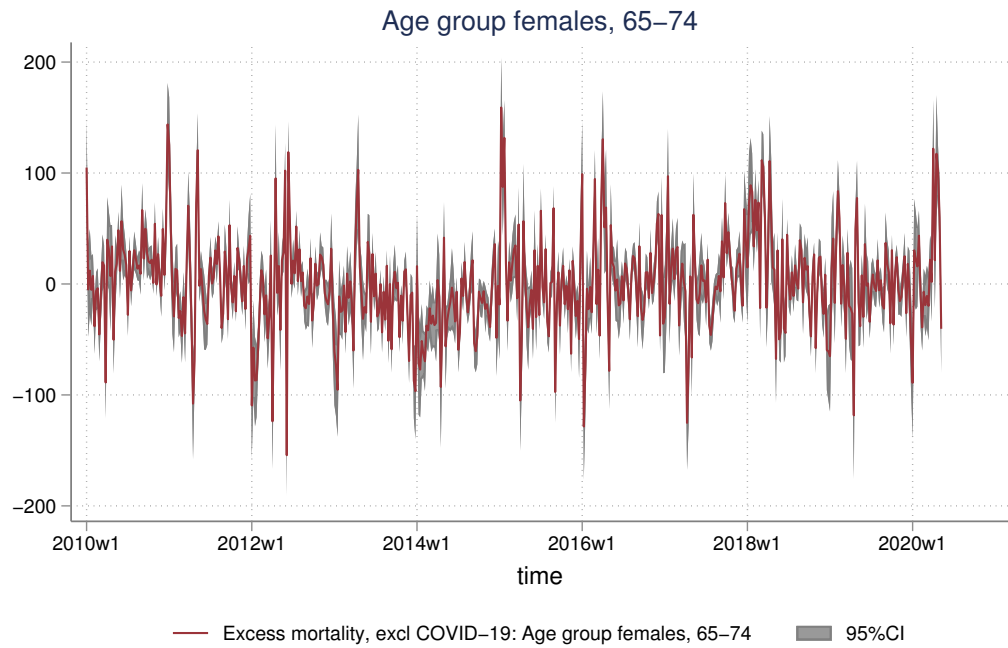

Figure 287: Females 65-74 all-cause excess deaths (-COVID19), fm 2019 wk1

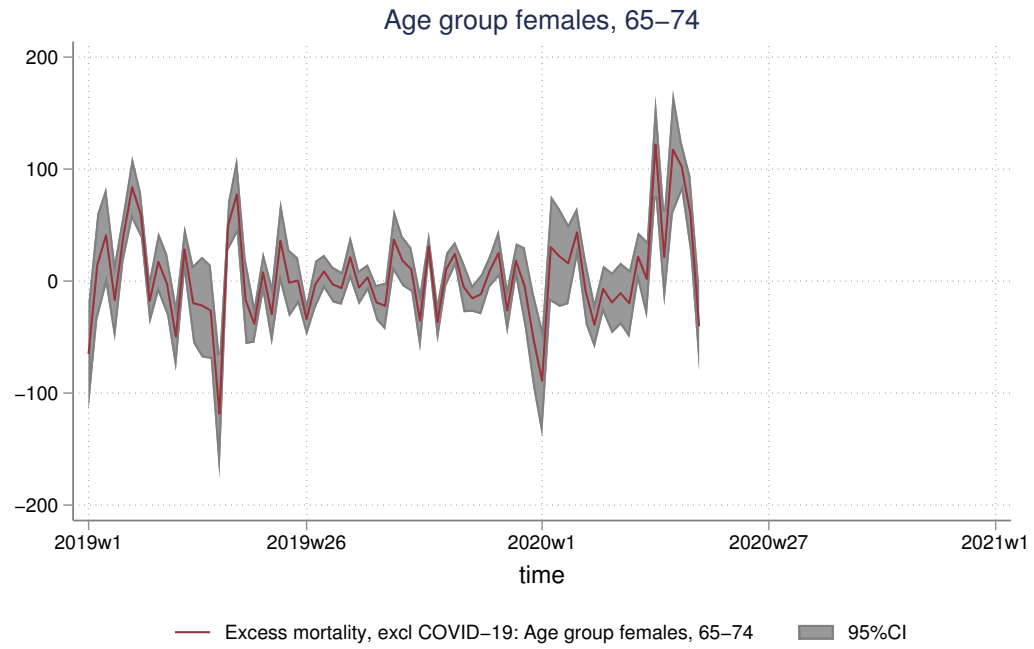

Figure 288: Females 65-74 all-cause excess deaths (-COVID19), fm 2020 wk1

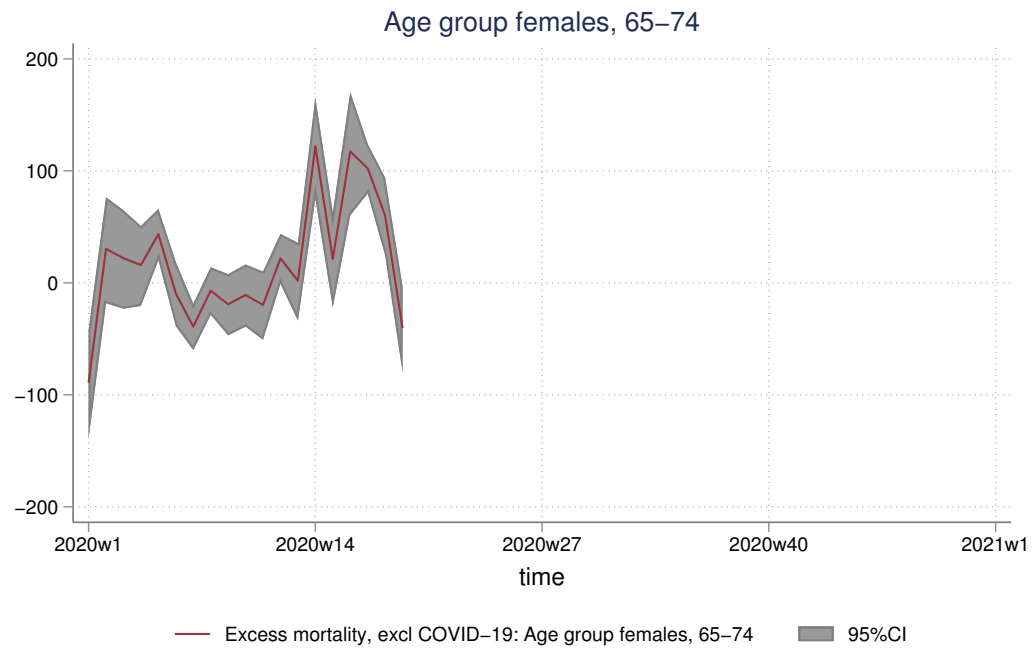

## 5.7 Females aged 75-84

Figure 289: Females 75-84 mortality time trend and model, fm 2010 wk1

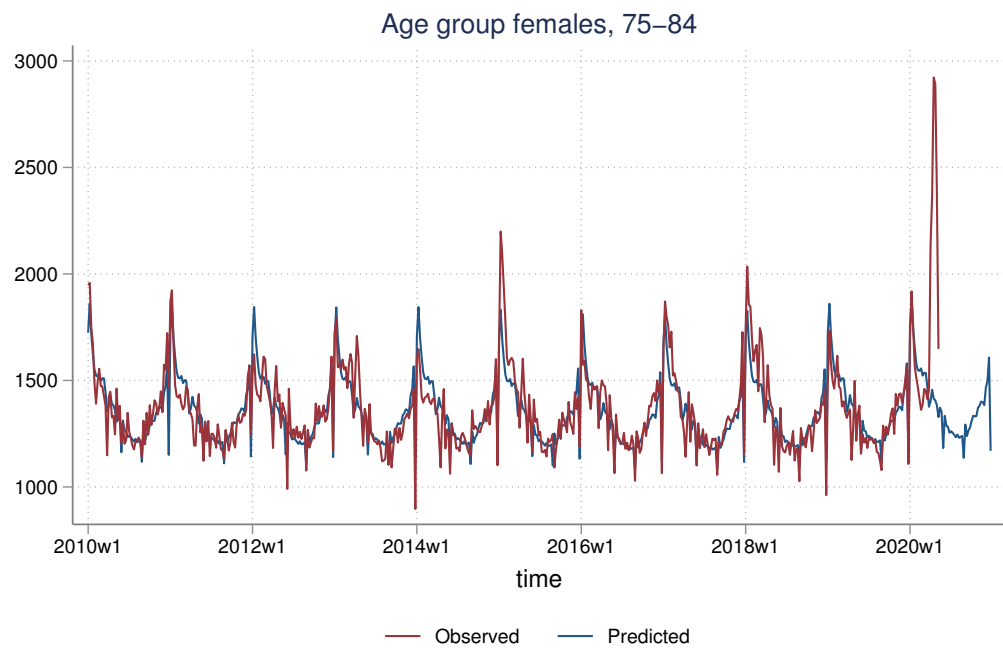

Figure 290: Females 75-84 mortality time trend and model, fm 2019 wk1

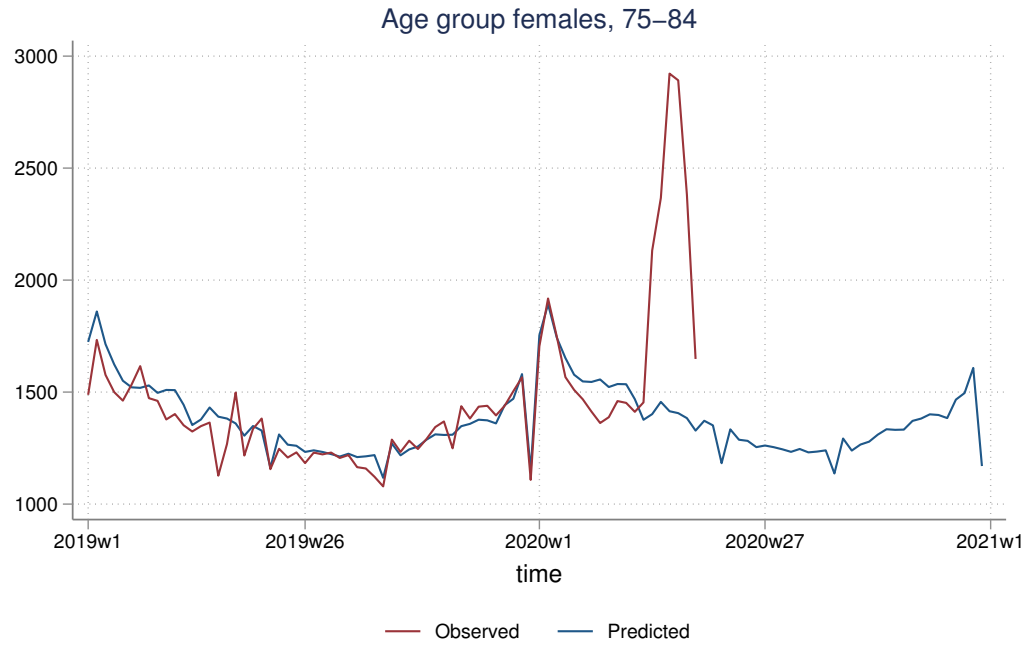

Figure 291: Females 75-84 mortality time trend and model, fm 2020 wk1

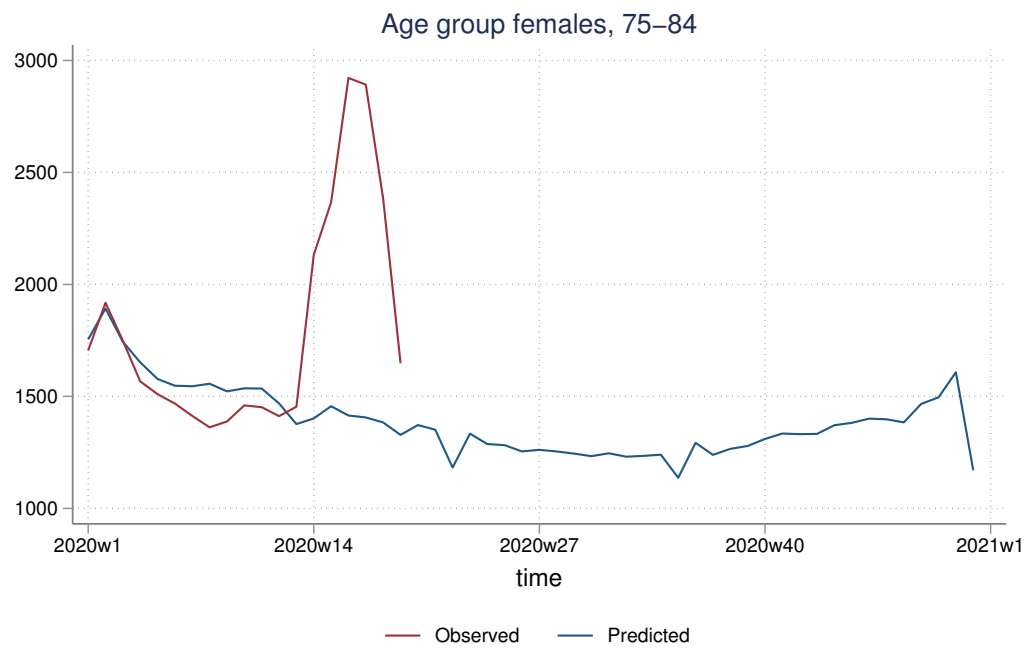

Figure 292: Females 75-84 all-cause excess deaths, fm 2010 wk1

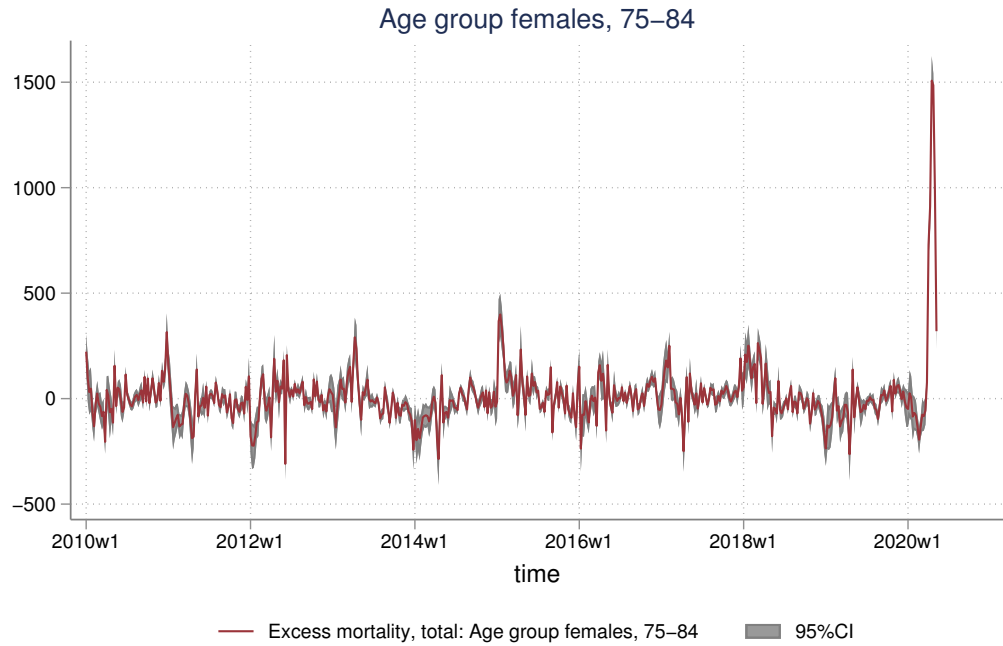

Figure 293: Females 75-84 all-cause excess deaths, fm 2019 wk1

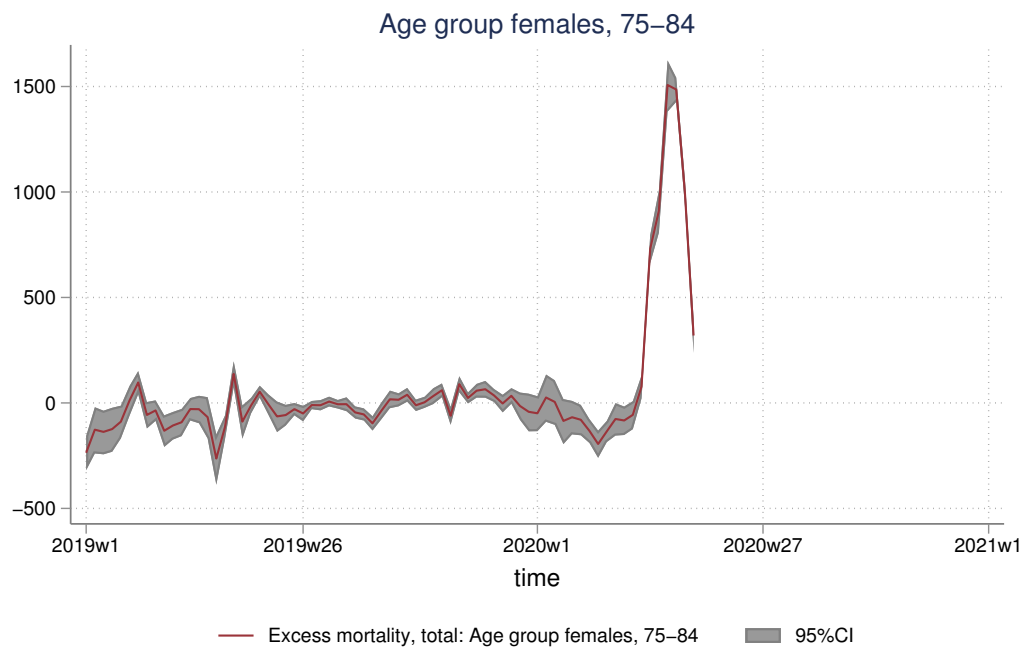

Figure 294: Females 75-84 all-cause excess deaths, fm 2020 wk1

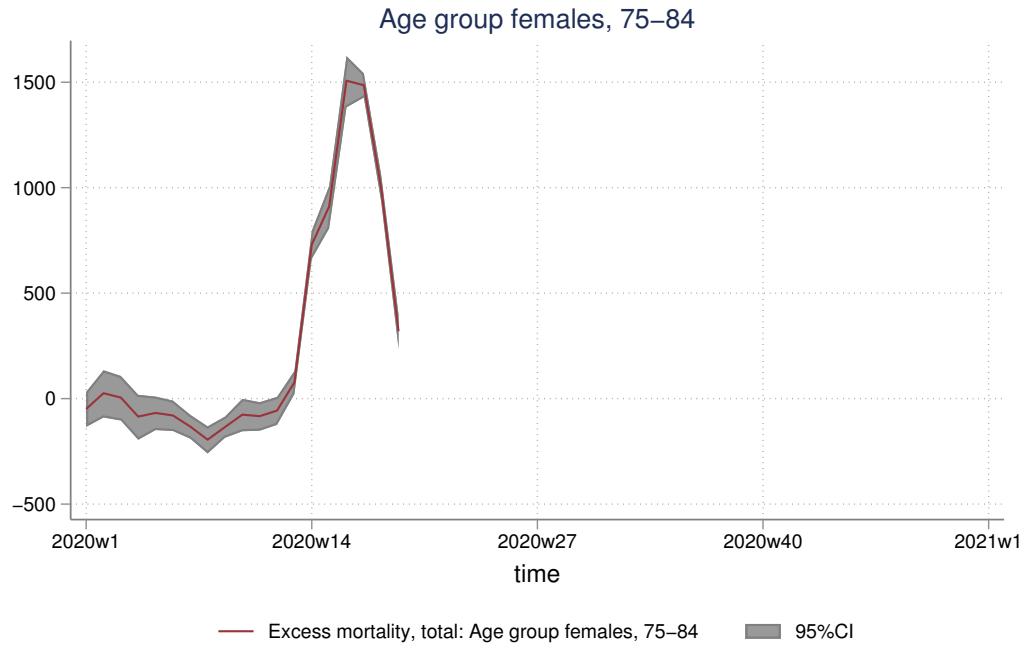

Figure 295: Females 75-84 all-cause excess deaths (–COVID19), fm 2010 wk1

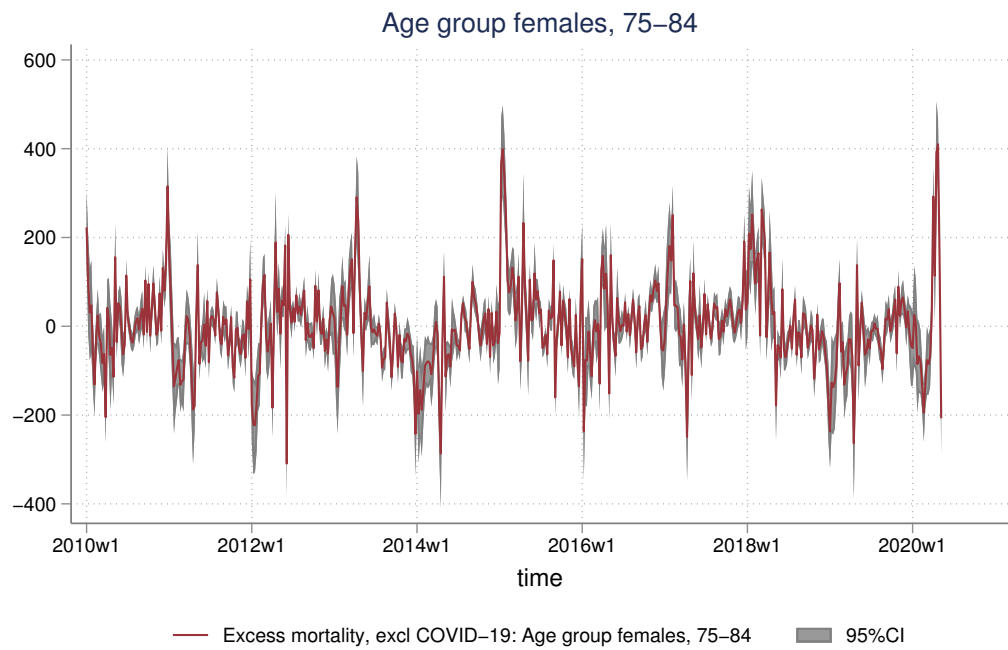

Figure 296: Females 75-84 all-cause excess deaths (-COVID19), fm 2019 wk1

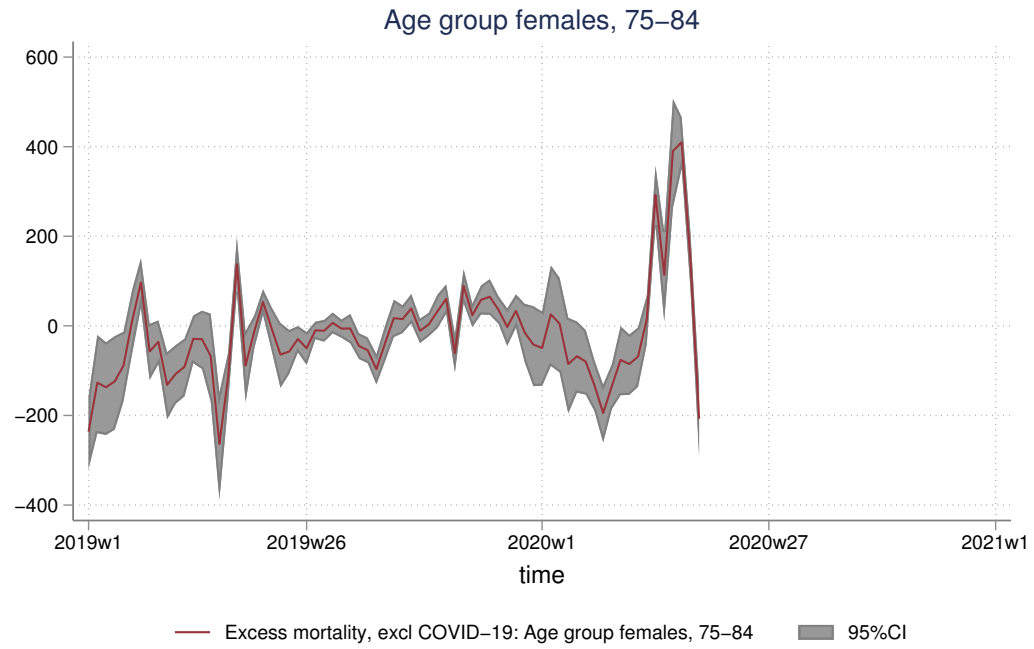

Figure 297: Females 75-84 all-cause excess deaths (-COVID19), fm 2020 wk1

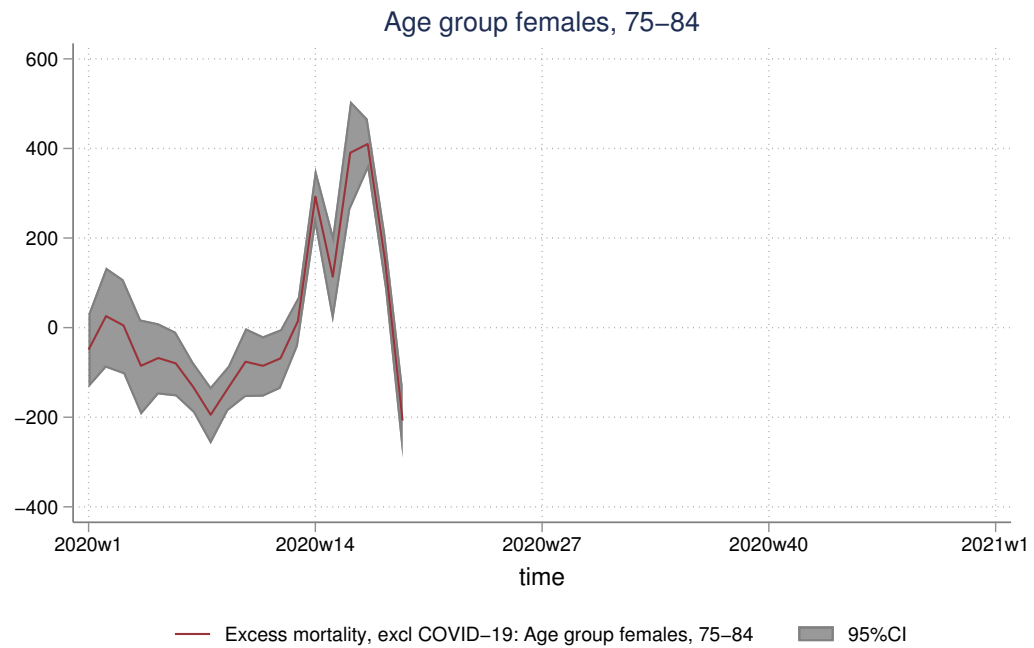

## 5.8 Females aged 85+

Figure 298: Females 85+ mortality time trend and model, fm 2010 wk1

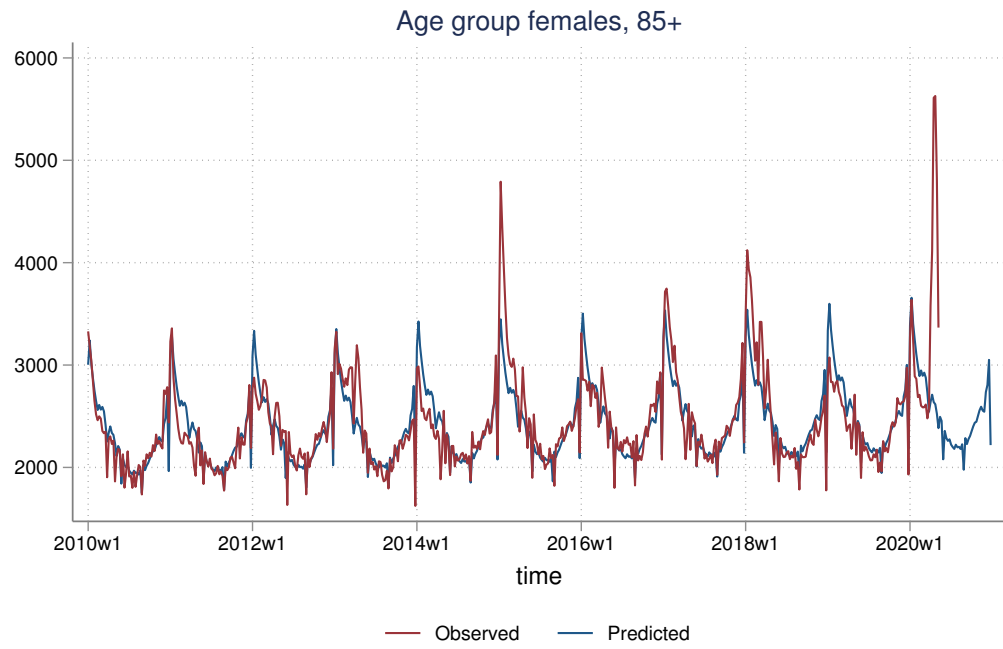



Figure 299: Females 85+ mortality time trend and model, fm 2019 wk1

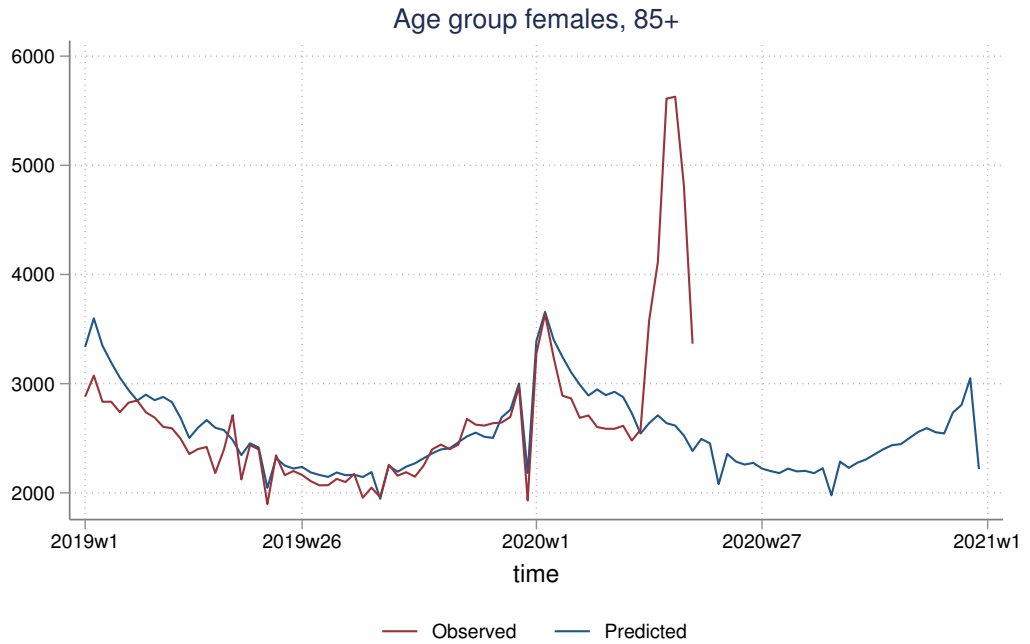

Figure 300: Females 85+ mortality time trend and model, fm 2020 wk1

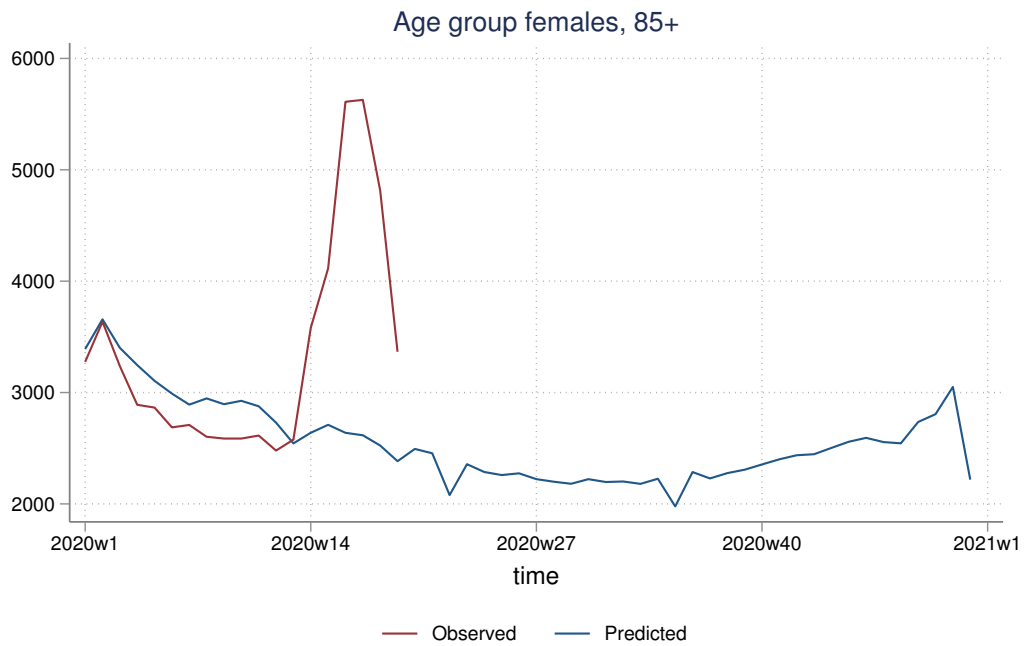

Figure 301: Females 85+ all-cause excess deaths, fm 2010 wk1

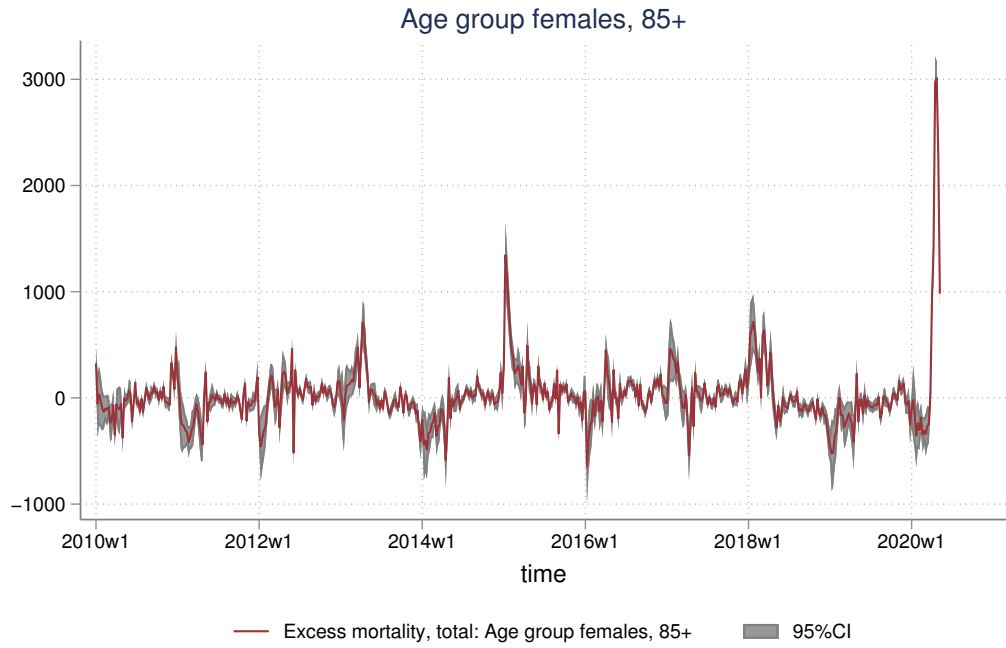

Figure 302: Females 85+ all-cause excess deaths, fm 2019 wk1

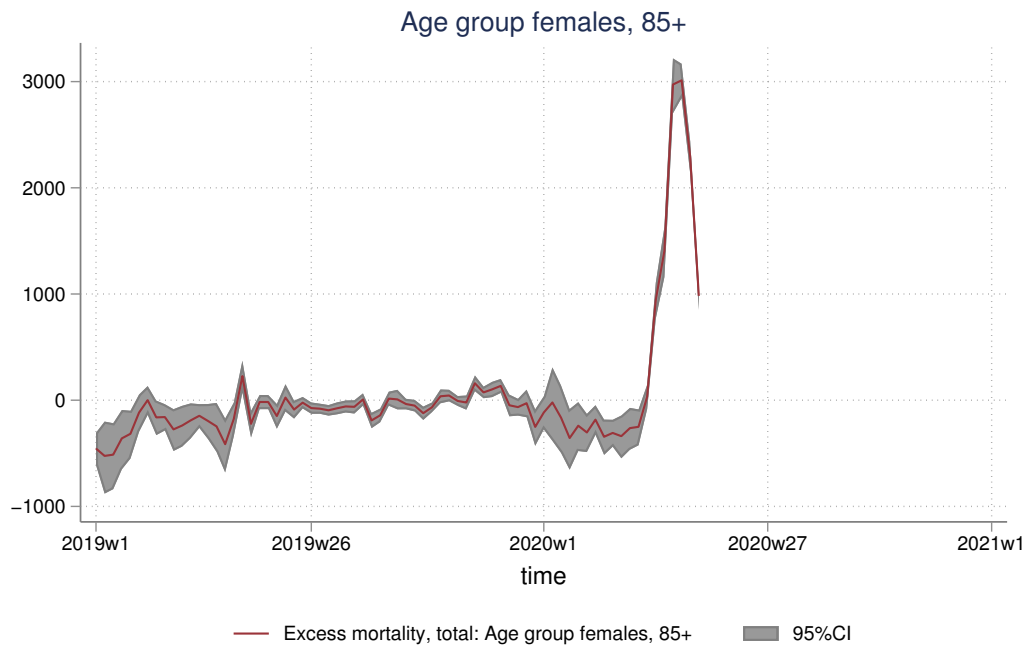

Figure 303: Females 85+ all-cause excess deaths, fm 2020 wk1

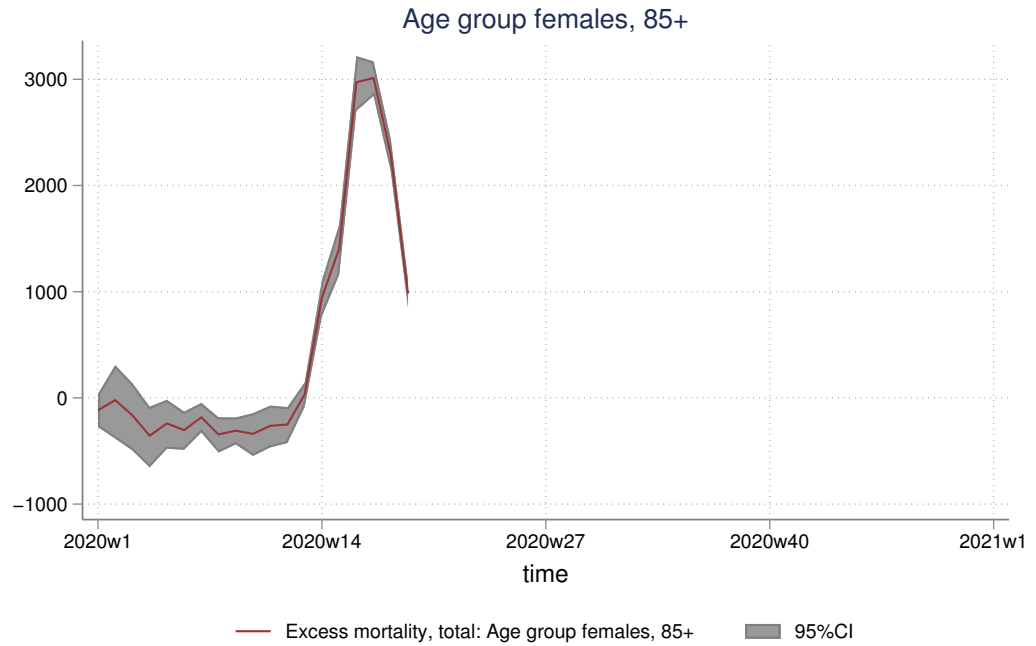

Figure 304: Females 85+ all-cause excess deaths (-COVID19), fm 2010 wk1

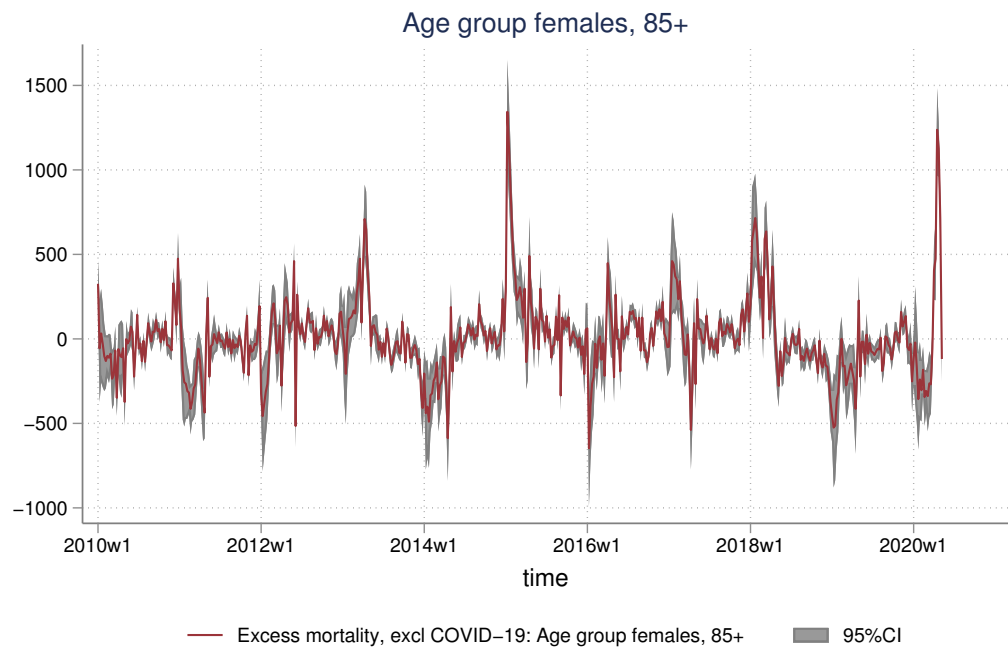

Figure 305: Females 85+ all-cause excess deaths (-COVID19), fm 2019 wk1

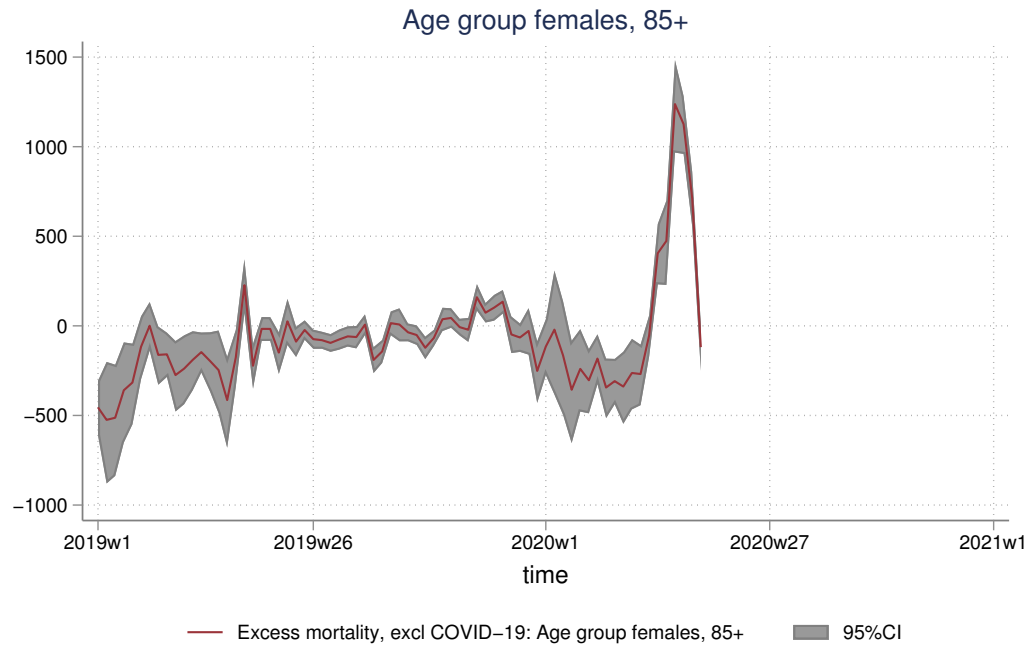

Figure 306: Females 85+ all-cause excess deaths (-COVID19), fm 2020 wk1

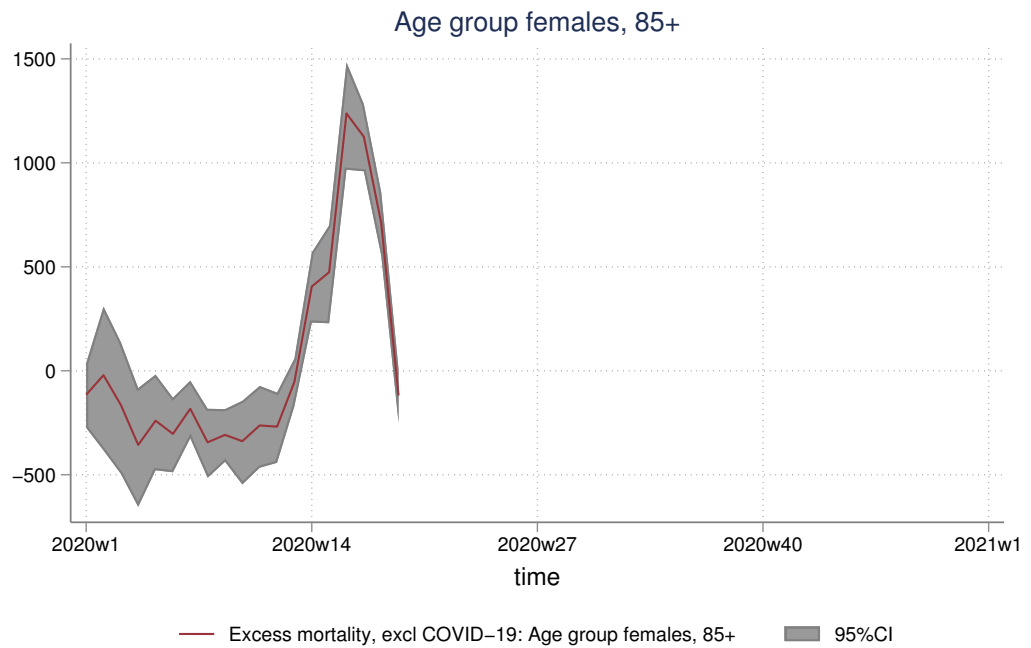

## References

ONS (2020), *User guide to mortality statistics*. Accessed: 2020-05-06.

**URL:** <https://www.ons.gov.uk/peoplepopulationandcommunity/birthsdeathsandmarriages/deaths/methodologies/userguidetomortalitystatisticsjuly2017>

# Appendix 2 to excess mortality in England and Wales during the 2020 COVID19 pandemic

Evangelos Kontopantelis  
Mamas A Mamas  
John Deanfield  
Miqdad Asaria  
Tim Doran

May 27, 2020

## Contents

|          |                                                                        |           |
|----------|------------------------------------------------------------------------|-----------|
| <b>1</b> | <b>England-Wales aggregates, per 100k population</b>                   | <b>10</b> |
| 1.1      | Time trend . . . . .                                                   | 10        |
| 1.2      | Time trend and Negative Binomial Regression model . . . . .            | 12        |
| 1.3      | Excess number of deaths: all causes . . . . .                          | 14        |
| 1.4      | Excess number of deaths: all causes minus COVID19 deaths . . . . .     | 16        |
| 1.5      | Excess number of deaths: all causes minus respiratory deaths . . . . . | 18        |
| <b>2</b> | <b>Regional, per 100k population</b>                                   | <b>20</b> |
| 2.1      | Time trends . . . . .                                                  | 20        |
| 2.2      | North East . . . . .                                                   | 22        |
| 2.3      | North West . . . . .                                                   | 27        |
| 2.4      | Yorkshire and the Humber . . . . .                                     | 32        |
| 2.5      | East Midlands . . . . .                                                | 37        |
| 2.6      | West Midlands . . . . .                                                | 42        |
| 2.7      | East . . . . .                                                         | 47        |
| 2.8      | London . . . . .                                                       | 52        |
| 2.9      | South East . . . . .                                                   | 57        |
| 2.10     | South West . . . . .                                                   | 62        |
| 2.11     | Wales . . . . .                                                        | 67        |
| <b>3</b> | <b>Age groups, per 100k people</b>                                     | <b>72</b> |
| 3.1      | Time trends . . . . .                                                  | 72        |
| 3.2      | All aged under 1 . . . . .                                             | 74        |
| 3.3      | All aged 01-14 . . . . .                                               | 79        |
| 3.4      | All aged 15-44 . . . . .                                               | 84        |
| 3.5      | All aged 45-64 . . . . .                                               | 89        |

|          |                                     |            |
|----------|-------------------------------------|------------|
| 3.6      | All aged 65-74 . . . . .            | 94         |
| 3.7      | All aged 75-84 . . . . .            | 99         |
| 3.8      | All aged 85+ . . . . .              | 104        |
| <b>4</b> | <b>Age groups, per 100k males</b>   | <b>109</b> |
| 4.1      | Time trends . . . . .               | 109        |
| 4.2      | Males aged under 1 . . . . .        | 111        |
| 4.3      | Males aged 01-14 . . . . .          | 116        |
| 4.4      | Males aged 15-44 . . . . .          | 121        |
| 4.5      | Males aged 45-64 . . . . .          | 126        |
| 4.6      | Males aged 65-74 . . . . .          | 131        |
| 4.7      | Males aged 75-84 . . . . .          | 136        |
| 4.8      | Males aged 85+ . . . . .            | 141        |
| <b>5</b> | <b>Age groups, per 100k females</b> | <b>146</b> |
| 5.1      | Time trends . . . . .               | 146        |
| 5.2      | Females aged under 1 . . . . .      | 148        |
| 5.3      | Females aged 01-14 . . . . .        | 153        |
| 5.4      | Females aged 15-44 . . . . .        | 158        |
| 5.5      | Females aged 45-64 . . . . .        | 163        |
| 5.6      | Females aged 65-74 . . . . .        | 168        |
| 5.7      | Females aged 75-84 . . . . .        | 173        |
| 5.8      | Females aged 85+ . . . . .          | 178        |

## List of Figures

|    |                                                                   |    |
|----|-------------------------------------------------------------------|----|
| 1  | Mortality time trend, from 2010 week 1 . . . . .                  | 10 |
| 2  | Mortality time trend, from 2019 week 1 . . . . .                  | 11 |
| 3  | Mortality time trend, from 2020 week 1 . . . . .                  | 11 |
| 4  | Mortality time trend and model, from 2010 week 1 . . . . .        | 12 |
| 5  | Mortality time trend and model, from 2019 week 1 . . . . .        | 13 |
| 6  | Mortality time trend and model, from 2020 week 1 . . . . .        | 13 |
| 7  | All-cause excess deaths, from 2010 week 1 . . . . .               | 14 |
| 8  | All-cause excess deaths, from 2019 week 1 . . . . .               | 15 |
| 9  | All-cause excess deaths, from 2020 week 1 . . . . .               | 15 |
| 10 | All-cause excess deaths minus COVID19, from 2010 week 1 . . . . . | 16 |
| 11 | All-cause excess deaths minus COVID19, from 2019 week 1 . . . . . | 17 |
| 12 | All-cause excess deaths minus COVID19, from 2020 week 1 . . . . . | 17 |
| 13 | All-cause excess deaths minus COVID19, from 2010 week 1 . . . . . | 18 |
| 14 | All-cause excess deaths minus COVID19, from 2019 week 1 . . . . . | 19 |
| 15 | All-cause excess deaths minus COVID19, from 2020 week 1 . . . . . | 19 |
| 16 | Regional mortality time trends, from 2010 week 1 . . . . .        | 20 |
| 17 | Regional mortality time trends, from 2019 week 1 . . . . .        | 21 |
| 18 | Regional mortality time trends, from 2020 week 1 . . . . .        | 21 |
| 19 | NE Mortality time trend and model, from 2010 week 1 . . . . .     | 22 |

|    |                                                                        |    |
|----|------------------------------------------------------------------------|----|
| 20 | NE Mortality time trend and model, from 2019 week 1 . . . . .          | 23 |
| 21 | NE Mortality time trend and model, from 2020 week 1 . . . . .          | 23 |
| 22 | NE all-cause excess deaths, from 2010 week 1 . . . . .                 | 24 |
| 23 | NE all-cause excess deaths, from 2019 week 1 . . . . .                 | 24 |
| 24 | NE all-cause excess deaths, from 2020 week 1 . . . . .                 | 25 |
| 25 | NE all-cause excess deaths minus COVID19, from 2010 week 1 . . . . .   | 25 |
| 26 | NE all-cause excess deaths minus COVID19, from 2019 week 1 . . . . .   | 26 |
| 27 | NE all-cause excess deaths minus COVID19, from 2020 week 1 . . . . .   | 26 |
| 28 | NW Mortality time trend and model, from 2010 week 1 . . . . .          | 27 |
| 29 | NW Mortality time trend and model, from 2019 week 1 . . . . .          | 28 |
| 30 | NW Mortality time trend and model, from 2020 week 1 . . . . .          | 28 |
| 31 | NW all-cause excess deaths, from 2010 week 1 . . . . .                 | 29 |
| 32 | NW all-cause excess deaths, from 2019 week 1 . . . . .                 | 29 |
| 33 | NW all-cause excess deaths, from 2020 week 1 . . . . .                 | 30 |
| 34 | NW all-cause excess deaths minus COVID19, from 2010 week 1 . . . . .   | 30 |
| 35 | NW all-cause excess deaths minus COVID19, from 2019 week 1 . . . . .   | 31 |
| 36 | NW all-cause excess deaths minus COVID19, from 2020 week 1 . . . . .   | 31 |
| 37 | YatH Mortality time trend and model, from 2010 week 1 . . . . .        | 32 |
| 38 | YatH Mortality time trend and model, from 2019 week 1 . . . . .        | 33 |
| 39 | YatH Mortality time trend and model, from 2020 week 1 . . . . .        | 33 |
| 40 | YatH all-cause excess deaths, from 2010 week 1 . . . . .               | 34 |
| 41 | YatH all-cause excess deaths, from 2019 week 1 . . . . .               | 34 |
| 42 | YatH all-cause excess deaths, from 2020 week 1 . . . . .               | 35 |
| 43 | YatH all-cause excess deaths minus COVID19, from 2010 week 1 . . . . . | 35 |
| 44 | YatH all-cause excess deaths minus COVID19, from 2019 week 1 . . . . . | 36 |
| 45 | YatH all-cause excess deaths minus COVID19, from 2020 week 1 . . . . . | 36 |
| 46 | EMD Mortality time trend and model, from 2010 week 1 . . . . .         | 37 |
| 47 | EMD Mortality time trend and model, from 2019 week 1 . . . . .         | 38 |
| 48 | EMD Mortality time trend and model, from 2020 week 1 . . . . .         | 38 |
| 49 | EMD all-cause excess deaths, from 2010 week 1 . . . . .                | 39 |
| 50 | EMD all-cause excess deaths, from 2019 week 1 . . . . .                | 39 |
| 51 | EMD all-cause excess deaths, from 2020 week 1 . . . . .                | 40 |
| 52 | EMD all-cause excess deaths minus COVID19, from 2010 week 1 . . . . .  | 40 |
| 53 | EMD all-cause excess deaths minus COVID19, from 2019 week 1 . . . . .  | 41 |
| 54 | EMD all-cause excess deaths minus COVID19, from 2020 week 1 . . . . .  | 41 |
| 55 | WMD Mortality time trend and model, from 2010 week 1 . . . . .         | 42 |
| 56 | WMD Mortality time trend and model, from 2019 week 1 . . . . .         | 43 |
| 57 | WMD Mortality time trend and model, from 2020 week 1 . . . . .         | 43 |
| 58 | WMD all-cause excess deaths, from 2010 week 1 . . . . .                | 44 |
| 59 | WMD all-cause excess deaths, from 2019 week 1 . . . . .                | 44 |
| 60 | WMD all-cause excess deaths, from 2020 week 1 . . . . .                | 45 |
| 61 | WMD all-cause excess deaths minus COVID19, from 2010 week 1 . . . . .  | 45 |
| 62 | WMD all-cause excess deaths minus COVID19, from 2019 week 1 . . . . .  | 46 |
| 63 | WMD all-cause excess deaths minus COVID19, from 2020 week 1 . . . . .  | 46 |
| 64 | East Mortality time trend and model, from 2010 week 1 . . . . .        | 47 |
| 65 | East Mortality time trend and model, from 2019 week 1 . . . . .        | 48 |



|     |                                                                  |    |
|-----|------------------------------------------------------------------|----|
| 66  | East Mortality time trend and model, from 2020 week 1 . . . . .  | 48 |
| 67  | East all-cause excess deaths, from 2010 week 1 . . . . .         | 49 |
| 68  | East all-cause excess deaths, from 2019 week 1 . . . . .         | 49 |
| 69  | East all-cause excess deaths, from 2020 week 1 . . . . .         | 50 |
| 70  | East all-cause excess deaths minus COVID19, from 2010 week 1 .   | 50 |
| 71  | East all-cause excess deaths minus COVID19, from 2019 week 1 .   | 51 |
| 72  | East all-cause excess deaths minus COVID19, from 2020 week 1 .   | 51 |
| 73  | London Mortality time trend and model, from 2010 week 1 . . . .  | 52 |
| 74  | London Mortality time trend and model, from 2019 week 1 . . . .  | 53 |
| 75  | London Mortality time trend and model, from 2020 week 1 . . . .  | 53 |
| 76  | London all-cause excess deaths, from 2010 week 1 . . . . .       | 54 |
| 77  | London all-cause excess deaths, from 2019 week 1 . . . . .       | 54 |
| 78  | London all-cause excess deaths, from 2020 week 1 . . . . .       | 55 |
| 79  | London all-cause excess deaths minus COVID19, from 2010 week 1   | 55 |
| 80  | London all-cause excess deaths minus COVID19, from 2019 week 1   | 56 |
| 81  | London all-cause excess deaths minus COVID19, from 2020 week 1   | 56 |
| 82  | SE Mortality time trend and model, from 2010 week 1 . . . . .    | 57 |
| 83  | SE Mortality time trend and model, from 2019 week 1 . . . . .    | 58 |
| 84  | SE Mortality time trend and model, from 2020 week 1 . . . . .    | 58 |
| 85  | SE all-cause excess deaths, from 2010 week 1 . . . . .           | 59 |
| 86  | SE all-cause excess deaths, from 2019 week 1 . . . . .           | 59 |
| 87  | SE all-cause excess deaths, from 2020 week 1 . . . . .           | 60 |
| 88  | SE all-cause excess deaths minus COVID19, from 2010 week 1 . .   | 60 |
| 89  | SE all-cause excess deaths minus COVID19, from 2019 week 1 . .   | 61 |
| 90  | SE all-cause excess deaths minus COVID19, from 2020 week 1 . .   | 61 |
| 91  | SW Mortality time trend and model, from 2010 week 1 . . . . .    | 62 |
| 92  | SE Mortality time trend and model, from 2019 week 1 . . . . .    | 63 |
| 93  | SW Mortality time trend and model, from 2020 week 1 . . . . .    | 63 |
| 94  | SW all-cause excess deaths, from 2010 week 1 . . . . .           | 64 |
| 95  | SW all-cause excess deaths, from 2019 week 1 . . . . .           | 64 |
| 96  | SW all-cause excess deaths, from 2020 week 1 . . . . .           | 65 |
| 97  | SW all-cause excess deaths minus COVID19, from 2010 week 1 .     | 65 |
| 98  | SW all-cause excess deaths minus COVID19, from 2019 week 1 .     | 66 |
| 99  | SW all-cause excess deaths minus COVID19, from 2020 week 1 .     | 66 |
| 100 | Wales Mortality time trend and model, from 2010 week 1 . . . . . | 67 |
| 101 | SE Mortality time trend and model, from 2019 week 1 . . . . .    | 68 |
| 102 | Wales Mortality time trend and model, from 2020 week 1 . . . . . | 68 |
| 103 | Wales all-cause excess deaths, from 2010 week 1 . . . . .        | 69 |
| 104 | Wales all-cause excess deaths, from 2019 week 1 . . . . .        | 69 |
| 105 | Wales all-cause excess deaths, from 2020 week 1 . . . . .        | 70 |
| 106 | Wales all-cause excess deaths minus COVID19, from 2010 week 1    | 70 |
| 107 | Wales all-cause excess deaths minus COVID19, from 2019 week 1    | 71 |
| 108 | Wales all-cause excess deaths minus COVID19, from 2020 week 1    | 71 |
| 109 | All age group mortality time trends, from 2010 week 1 . . . . .  | 72 |
| 110 | All age group mortality time trends, from 2019 week 1 . . . . .  | 73 |
| 111 | All age group mortality time trends, from 2020 week 1 . . . . .  | 73 |

|     |                                                                  |    |
|-----|------------------------------------------------------------------|----|
| 112 | All < 1 mortality time trend and model, from 2010 week 1 . . . . | 74 |
| 113 | All < 1 mortality time trend and model, from 2019 week 1 . . . . | 75 |
| 114 | All < 1 mortality time trend and model, from 2020 week 1 . . . . | 75 |
| 115 | All < 1 all-cause excess deaths, from 2010 week 1 . . . . .      | 76 |
| 116 | All < 1 all-cause excess deaths, from 2019 week 1 . . . . .      | 76 |
| 117 | All < 1 all-cause excess deaths, from 2020 week 1 . . . . .      | 77 |
| 118 | All < 1 all-cause excess deaths minus COVID19, from 2010 week 1  | 77 |
| 119 | All < 1 all-cause excess deaths minus COVID19, from 2019 week 1  | 78 |
| 120 | All < 1 all-cause excess deaths minus COVID19, from 2020 week 1  | 78 |
| 121 | All 01-14 mortality time trend and model, from 2010 week 1 . . . | 79 |
| 122 | All 01-14 mortality time trend and model, from 2019 week 1 . . . | 80 |
| 123 | All 01-14 mortality time trend and model, from 2020 week 1 . . . | 80 |
| 124 | All 01-14 all-cause excess deaths, from 2010 week 1 . . . . .    | 81 |
| 125 | All 01-14 all-cause excess deaths, from 2019 week 1 . . . . .    | 81 |
| 126 | All 01-14 all-cause excess deaths, from 2020 week 1 . . . . .    | 82 |
| 127 | All 01-14 all-cause excess deaths (–COVID19), from 2010 week 1   | 82 |
| 128 | All 01-14 all-cause excess deaths (–COVID19), from 2019 week 1   | 83 |
| 129 | All 01-14 all-cause excess deaths (–COVID19), from 2020 week 1   | 83 |
| 130 | All 15-44 mortality time trend and model, from 2010 week 1 . . . | 84 |
| 131 | All 15-44 mortality time trend and model, from 2019 week 1 . . . | 85 |
| 132 | All 15-44 mortality time trend and model, from 2020 week 1 . . . | 85 |
| 133 | All 15-44 all-cause excess deaths, from 2010 week 1 . . . . .    | 86 |
| 134 | All 15-44 all-cause excess deaths, from 2019 week 1 . . . . .    | 86 |
| 135 | All 15-44 all-cause excess deaths, from 2020 week 1 . . . . .    | 87 |
| 136 | All 15-44 all-cause excess deaths (–COVID19), from 2010 week 1   | 87 |
| 137 | All 15-44 all-cause excess deaths (–COVID19), from 2019 week 1   | 88 |
| 138 | All 15-44 all-cause excess deaths (–COVID19), from 2020 week 1   | 88 |
| 139 | All 45-64 mortality time trend and model, from 2010 week 1 . . . | 89 |
| 140 | All 45-64 mortality time trend and model, from 2019 week 1 . . . | 90 |
| 141 | All 45-64 mortality time trend and model, from 2020 week 1 . . . | 90 |
| 142 | All 45-64 all-cause excess deaths, from 2010 week 1 . . . . .    | 91 |
| 143 | All 45-64 all-cause excess deaths, from 2019 week 1 . . . . .    | 91 |
| 144 | All 45-64 all-cause excess deaths, from 2020 week 1 . . . . .    | 92 |
| 145 | All 45-64 all-cause excess deaths (–COVID19), from 2010 week 1   | 92 |
| 146 | All 45-64 all-cause excess deaths (–COVID19), from 2019 week 1   | 93 |
| 147 | All 45-64 all-cause excess deaths (–COVID19), from 2020 week 1   | 93 |
| 148 | All 65-74 mortality time trend and model, from 2010 week 1 . . . | 94 |
| 149 | All 65-74 mortality time trend and model, from 2019 week 1 . . . | 95 |
| 150 | All 65-74 mortality time trend and model, from 2020 week 1 . . . | 95 |
| 151 | All 65-74 all-cause excess deaths, from 2010 week 1 . . . . .    | 96 |
| 152 | All 65-74 all-cause excess deaths, from 2019 week 1 . . . . .    | 96 |
| 153 | All 65-74 all-cause excess deaths, from 2020 week 1 . . . . .    | 97 |
| 154 | All 65-74 all-cause excess deaths (–COVID19), from 2010 week 1   | 97 |
| 155 | All 65-74 all-cause excess deaths (–COVID19), from 2019 week 1   | 98 |
| 156 | All 65-74 all-cause excess deaths (–COVID19), from 2020 week 1   | 98 |
| 157 | All 75-84 mortality time trend and model, from 2010 week 1 . . . | 99 |

|     |                                                                   |     |
|-----|-------------------------------------------------------------------|-----|
| 158 | All 75-84 mortality time trend and model, from 2019 week 1 . . .  | 100 |
| 159 | All 75-84 mortality time trend and model, from 2020 week 1 . . .  | 100 |
| 160 | All 75-84 all-cause excess deaths, from 2010 week 1 . . . . .     | 101 |
| 161 | All 75-84 all-cause excess deaths, from 2019 week 1 . . . . .     | 101 |
| 162 | All 75-84 all-cause excess deaths, from 2020 week 1 . . . . .     | 102 |
| 163 | All 75-84 all-cause excess deaths (–COVID19), from 2010 week 1    | 102 |
| 164 | All 75-84 all-cause excess deaths (–COVID19), from 2019 week 1    | 103 |
| 165 | All 75-84 all-cause excess deaths (–COVID19), from 2020 week 1    | 103 |
| 166 | All 85+ mortality time trend and model, from 2010 week 1 . . .    | 104 |
| 167 | All 85+ mortality time trend and model, from 2019 week 1 . . .    | 105 |
| 168 | All 85+ mortality time trend and model, from 2020 week 1 . . .    | 105 |
| 169 | All 85+ all-cause excess deaths, from 2010 week 1 . . . . .       | 106 |
| 170 | All 85+ all-cause excess deaths, from 2019 week 1 . . . . .       | 106 |
| 171 | All 85+ all-cause excess deaths, from 2020 week 1 . . . . .       | 107 |
| 172 | All 85+ all-cause excess deaths (–COVID19), from 2010 week 1      | 107 |
| 173 | All 85+ all-cause excess deaths (–COVID19), from 2019 week 1      | 108 |
| 174 | All 85+ all-cause excess deaths (–COVID19), from 2020 week 1      | 108 |
| 175 | Male age group mortality time trends, from 2010 wk1 . . . . .     | 109 |
| 176 | Male age group mortality time trends, from 2019 wk1 . . . . .     | 110 |
| 177 | Male age group mortality time trends, from 2020 wk1 . . . . .     | 110 |
| 178 | Males < 1 mortality time trend and model, from 2010 wk1 . . . .   | 111 |
| 179 | Males < 1 mortality time trend and model, from 2019 wk1 . . . .   | 112 |
| 180 | Males < 1 mortality time trend and model, from 2020 wk1 . . . .   | 112 |
| 181 | Males < 1 all-cause excess deaths, from 2010 wk1 . . . . .        | 113 |
| 182 | Males < 1 all-cause excess deaths, from 2019 wk1 . . . . .        | 113 |
| 183 | Males < 1 all-cause excess deaths, from 2020 wk1 . . . . .        | 114 |
| 184 | Males < 1 all-cause excess deaths minus COVID19, from 2010 wk1114 |     |
| 185 | Males < 1 all-cause excess deaths minus COVID19, from 2019 wk1115 |     |
| 186 | Males < 1 all-cause excess deaths minus COVID19, from 2020 wk1115 |     |
| 187 | Males 01-14 mortality time trend and model, from 2010 wk1 . . .   | 116 |
| 188 | Males 01-14 mortality time trend and model, from 2019 wk1 . . .   | 117 |
| 189 | Males 01-14 mortality time trend and model, from 2020 wk1 . . .   | 117 |
| 190 | Males 01-14 all-cause excess deaths, from 2010 wk1 . . . . .      | 118 |
| 191 | Males 01-14 all-cause excess deaths, from 2019 wk1 . . . . .      | 118 |
| 192 | Males 01-14 all-cause excess deaths, from 2020 wk1 . . . . .      | 119 |
| 193 | Males 01-14 all-cause excess deaths (–COVID19), from 2010 wk1     | 119 |
| 194 | Males 01-14 all-cause excess deaths (–COVID19), from 2019 wk1     | 120 |
| 195 | Males 01-14 all-cause excess deaths (–COVID19), from 2020 wk1     | 120 |
| 196 | Males 15-44 mortality time trend and model, from 2010 wk1 . . .   | 121 |
| 197 | Males 15-44 mortality time trend and model, from 2019 wk1 . . .   | 122 |
| 198 | Males 15-44 mortality time trend and model, from 2020 wk1 . . .   | 122 |
| 199 | Males 15-44 all-cause excess deaths, from 2010 wk1 . . . . .      | 123 |
| 200 | Males 15-44 all-cause excess deaths, from 2019 wk1 . . . . .      | 123 |
| 201 | Males 15-44 all-cause excess deaths, from 2020 wk1 . . . . .      | 124 |
| 202 | Males 15-44 all-cause excess deaths (–COVID19), from 2010 wk1     | 124 |
| 203 | Males 15-44 all-cause excess deaths (–COVID19), from 2019 wk1     | 125 |

|     |                                                                 |     |
|-----|-----------------------------------------------------------------|-----|
| 204 | Males 15-44 all-cause excess deaths (–COVID19), from 2020 wk1   | 125 |
| 205 | Males 45-64 mortality time trend and model, from 2010 wk1 . . . | 126 |
| 206 | Males 45-64 mortality time trend and model, from 2019 wk1 . . . | 127 |
| 207 | Males 45-64 mortality time trend and model, from 2020 wk1 . . . | 127 |
| 208 | Males 45-64 all-cause excess deaths, from 2010 wk1 . . . . .    | 128 |
| 209 | Males 45-64 all-cause excess deaths, from 2019 wk1 . . . . .    | 128 |
| 210 | Males 45-64 all-cause excess deaths, from 2020 wk1 . . . . .    | 129 |
| 211 | Males 45-64 all-cause excess deaths (–COVID19), from 2010 wk1   | 129 |
| 212 | Males 45-64 all-cause excess deaths (–COVID19), from 2019 wk1   | 130 |
| 213 | Males 45-64 all-cause excess deaths (–COVID19), from 2020 wk1   | 130 |
| 214 | Males 65-74 mortality time trend and model, from 2010 wk1 . . . | 131 |
| 215 | Males 65-74 mortality time trend and model, from 2019 wk1 . . . | 132 |
| 216 | Males 65-74 mortality time trend and model, from 2020 wk1 . . . | 132 |
| 217 | Males 65-74 all-cause excess deaths, from 2010 wk1 . . . . .    | 133 |
| 218 | Males 65-74 all-cause excess deaths, from 2019 wk1 . . . . .    | 133 |
| 219 | Males 65-74 all-cause excess deaths, from 2020 wk1 . . . . .    | 134 |
| 220 | Males 65-74 all-cause excess deaths (–COVID19), from 2010 wk1   | 134 |
| 221 | Males 65-74 all-cause excess deaths (–COVID19), from 2019 wk1   | 135 |
| 222 | Males 65-74 all-cause excess deaths (–COVID19), from 2020 wk1   | 135 |
| 223 | Males 75-84 mortality time trend and model, from 2010 wk1 . . . | 136 |
| 224 | Males 75-84 mortality time trend and model, from 2019 wk1 . . . | 137 |
| 225 | Males 75-84 mortality time trend and model, from 2020 wk1 . . . | 137 |
| 226 | Males 75-84 all-cause excess deaths, from 2010 wk1 . . . . .    | 138 |
| 227 | Males 75-84 all-cause excess deaths, from 2019 wk1 . . . . .    | 138 |
| 228 | Males 75-84 all-cause excess deaths, from 2020 wk1 . . . . .    | 139 |
| 229 | Males 75-84 all-cause excess deaths (–COVID19), from 2010 wk1   | 139 |
| 230 | Males 75-84 all-cause excess deaths (–COVID19), from 2019 wk1   | 140 |
| 231 | Males 75-84 all-cause excess deaths (–COVID19), from 2020 wk1   | 140 |
| 232 | Males 85+ mortality time trend and model, from 2010 wk1 . . .   | 141 |
| 233 | Males 85+ mortality time trend and model, from 2019 wk1 . . .   | 142 |
| 234 | Males 85+ mortality time trend and model, from 2020 wk1 . . .   | 142 |
| 235 | Males 85+ all-cause excess deaths, from 2010 wk1 . . . . .      | 143 |
| 236 | Males 85+ all-cause excess deaths, from 2019 wk1 . . . . .      | 143 |
| 237 | Males 85+ all-cause excess deaths, from 2020 wk1 . . . . .      | 144 |
| 238 | Males 85+ all-cause excess deaths (–COVID19), from 2010 wk1     | 144 |
| 239 | Males 85+ all-cause excess deaths (–COVID19), from 2019 wk1     | 145 |
| 240 | Males 85+ all-cause excess deaths (–COVID19), from 2020 wk1     | 145 |
| 241 | Female age group mortality time trends, fm 2010 wk1 . . . . .   | 146 |
| 242 | Female age group mortality time trends, fm 2019 wk1 . . . . .   | 147 |
| 243 | Female age group mortality time trends, fm 2020 wk1 . . . . .   | 147 |
| 244 | Females < 1 mortality time trend and model, fm 2010 wk1 . . .   | 148 |
| 245 | Females < 1 mortality time trend and model, fm 2019 wk1 . . .   | 149 |
| 246 | Females < 1 mortality time trend and model, fm 2020 wk1 . . .   | 149 |
| 247 | Females < 1 all-cause excess deaths, fm 2010 wk1 . . . . .      | 150 |
| 248 | Females < 1 all-cause excess deaths, fm 2019 wk1 . . . . .      | 150 |
| 249 | Females < 1 all-cause excess deaths, fm 2020 wk1 . . . . .      | 151 |

|     |                                                                |     |
|-----|----------------------------------------------------------------|-----|
| 250 | Females < 1 all-cause excess deaths minus COVID19, fm 2010 wk1 | 151 |
| 251 | Females < 1 all-cause excess deaths minus COVID19, fm 2019 wk1 | 152 |
| 252 | Females < 1 all-cause excess deaths minus COVID19, fm 2020 wk1 | 152 |
| 253 | Females 01-14 mortality time trend and model, fm 2010 wk1      | 153 |
| 254 | Females 01-14 mortality time trend and model, fm 2019 wk1      | 154 |
| 255 | Females 01-14 mortality time trend and model, fm 2020 wk1      | 154 |
| 256 | Females 01-14 all-cause excess deaths, fm 2010 wk1             | 155 |
| 257 | Females 01-14 all-cause excess deaths, fm 2019 wk1             | 155 |
| 258 | Females 01-14 all-cause excess deaths, fm 2020 wk1             | 156 |
| 259 | Females 01-14 all-cause excess deaths (-COVID19), fm 2010 wk1  | 156 |
| 260 | Females 01-14 all-cause excess deaths (-COVID19), fm 2019 wk1  | 157 |
| 261 | Females 01-14 all-cause excess deaths (-COVID19), fm 2020 wk1  | 157 |
| 262 | Females 15-44 mortality time trend and model, fm 2010 wk1      | 158 |
| 263 | Females 15-44 mortality time trend and model, fm 2019 wk1      | 159 |
| 264 | Females 15-44 mortality time trend and model, fm 2020 wk1      | 159 |
| 265 | Females 15-44 all-cause excess deaths, fm 2010 wk1             | 160 |
| 266 | Females 15-44 all-cause excess deaths, fm 2019 wk1             | 160 |
| 267 | Females 15-44 all-cause excess deaths, fm 2020 wk1             | 161 |
| 268 | Females 15-44 all-cause excess deaths (-COVID19), fm 2010 wk1  | 161 |
| 269 | Females 15-44 all-cause excess deaths (-COVID19), fm 2019 wk1  | 162 |
| 270 | Females 15-44 all-cause excess deaths (-COVID19), fm 2020 wk1  | 162 |
| 271 | Females 45-64 mortality time trend and model, fm 2010 wk1      | 163 |
| 272 | Females 45-64 mortality time trend and model, fm 2019 wk1      | 164 |
| 273 | Females 45-64 mortality time trend and model, fm 2020 wk1      | 164 |
| 274 | Females 45-64 all-cause excess deaths, fm 2010 wk1             | 165 |
| 275 | Females 45-64 all-cause excess deaths, fm 2019 wk1             | 165 |
| 276 | Females 45-64 all-cause excess deaths, fm 2020 wk1             | 166 |
| 277 | Females 45-64 all-cause excess deaths (-COVID19), fm 2010 wk1  | 166 |
| 278 | Females 45-64 all-cause excess deaths (-COVID19), fm 2019 wk1  | 167 |
| 279 | Females 45-64 all-cause excess deaths (-COVID19), fm 2020 wk1  | 167 |
| 280 | Females 65-74 mortality time trend and model, fm 2010 wk1      | 168 |
| 281 | Females 65-74 mortality time trend and model, fm 2019 wk1      | 169 |
| 282 | Females 65-74 mortality time trend and model, fm 2020 wk1      | 169 |
| 283 | Females 65-74 all-cause excess deaths, fm 2010 wk1             | 170 |
| 284 | Females 65-74 all-cause excess deaths, fm 2019 wk1             | 170 |
| 285 | Females 65-74 all-cause excess deaths, fm 2020 wk1             | 171 |
| 286 | Females 65-74 all-cause excess deaths (-COVID19), fm 2010 wk1  | 171 |
| 287 | Females 65-74 all-cause excess deaths (-COVID19), fm 2019 wk1  | 172 |
| 288 | Females 65-74 all-cause excess deaths (-COVID19), fm 2020 wk1  | 172 |
| 289 | Females 75-84 mortality time trend and model, fm 2010 wk1      | 173 |
| 290 | Females 75-84 mortality time trend and model, fm 2019 wk1      | 174 |
| 291 | Females 75-84 mortality time trend and model, fm 2020 wk1      | 174 |
| 292 | Females 75-84 all-cause excess deaths, fm 2010 wk1             | 175 |
| 293 | Females 75-84 all-cause excess deaths, fm 2019 wk1             | 175 |
| 294 | Females 75-84 all-cause excess deaths, fm 2020 wk1             | 176 |
| 295 | Females 75-84 all-cause excess deaths (-COVID19), fm 2010 wk1  | 176 |

|     |                                                               |     |
|-----|---------------------------------------------------------------|-----|
| 296 | Females 75-84 all-cause excess deaths (–COVID19), fm 2019 wk1 | 177 |
| 297 | Females 75-84 all-cause excess deaths (–COVID19), fm 2020 wk1 | 177 |
| 298 | Females 85+ mortality time trend and model, fm 2010 wk1 . . . | 178 |
| 299 | Females 85+ mortality time trend and model, fm 2019 wk1 . . . | 179 |
| 300 | Females 85+ mortality time trend and model, fm 2020 wk1 . . . | 179 |
| 301 | Females 85+ all-cause excess deaths, fm 2010 wk1 . . . . .    | 180 |
| 302 | Females 85+ all-cause excess deaths, fm 2019 wk1 . . . . .    | 180 |
| 303 | Females 85+ all-cause excess deaths, fm 2020 wk1 . . . . .    | 181 |
| 304 | Females 85+ all-cause excess deaths (–COVID19), fm 2010 wk1   | 181 |
| 305 | Females 85+ all-cause excess deaths (–COVID19), fm 2019 wk1   | 182 |
| 306 | Females 85+ all-cause excess deaths (–COVID19), fm 2020 wk1   | 182 |

# 1 England-Wales aggregates, per 100k population

## 1.1 Time trend

Figure 1: Mortality time trend, from 2010 week 1

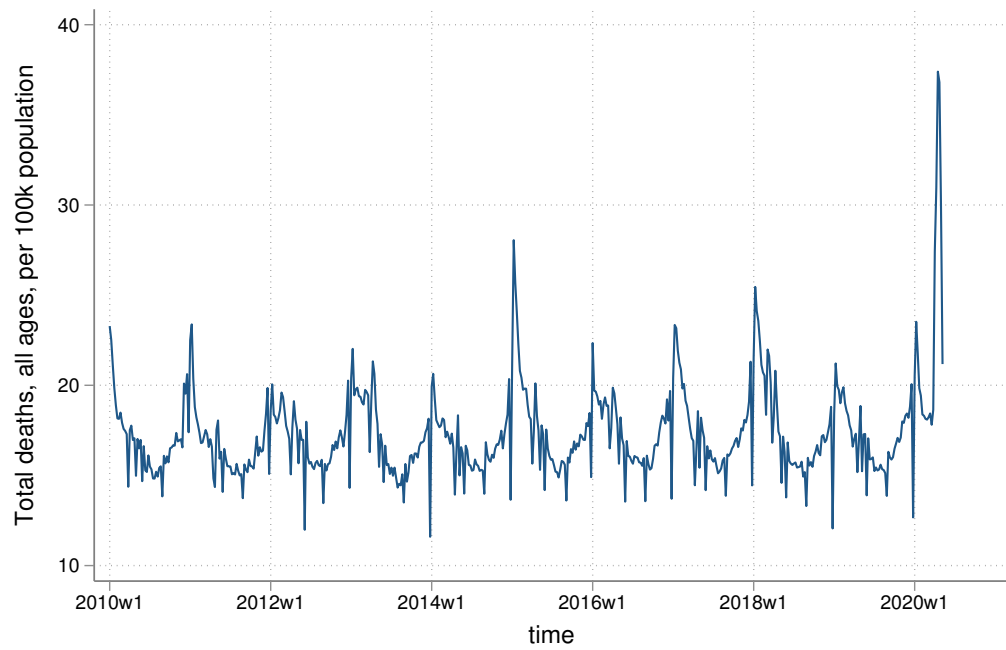

Figure 2: Mortality time trend, from 2019 week 1

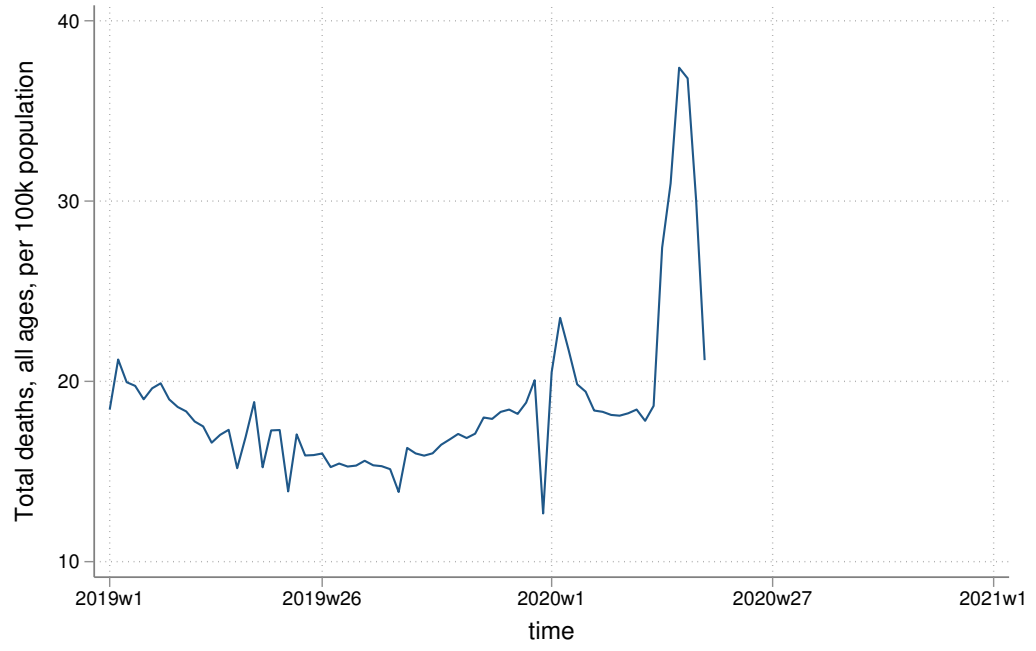

Figure 3: Mortality time trend, from 2020 week 1

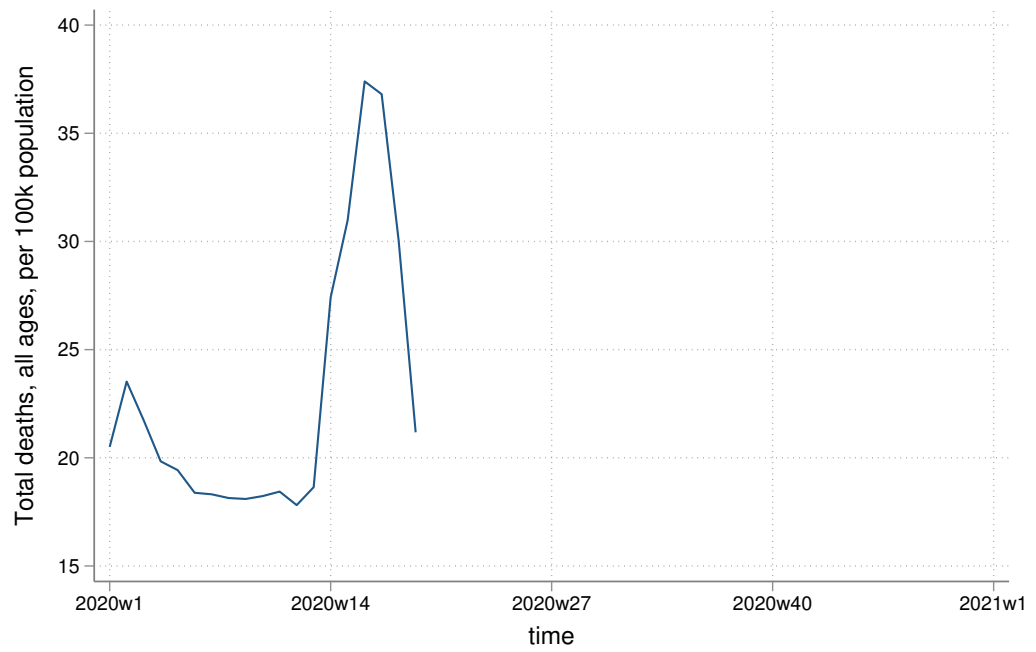



## 1.2 Time trend and Negative Binomial Regression model

Figure 4: Mortality time trend and model, from 2010 week 1

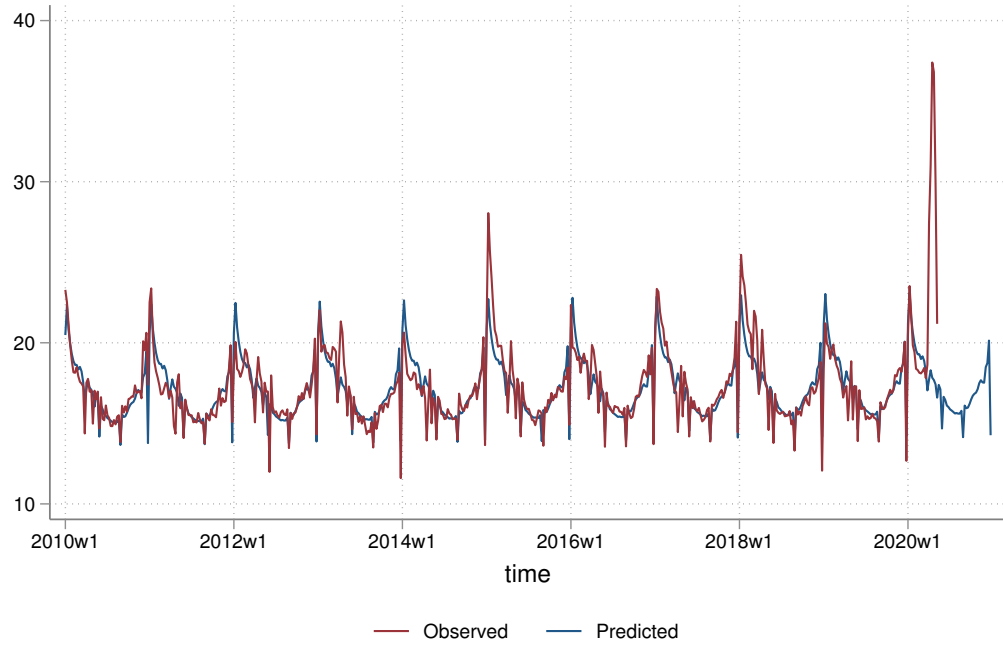

Figure 5: Mortality time trend and model, from 2019 week 1

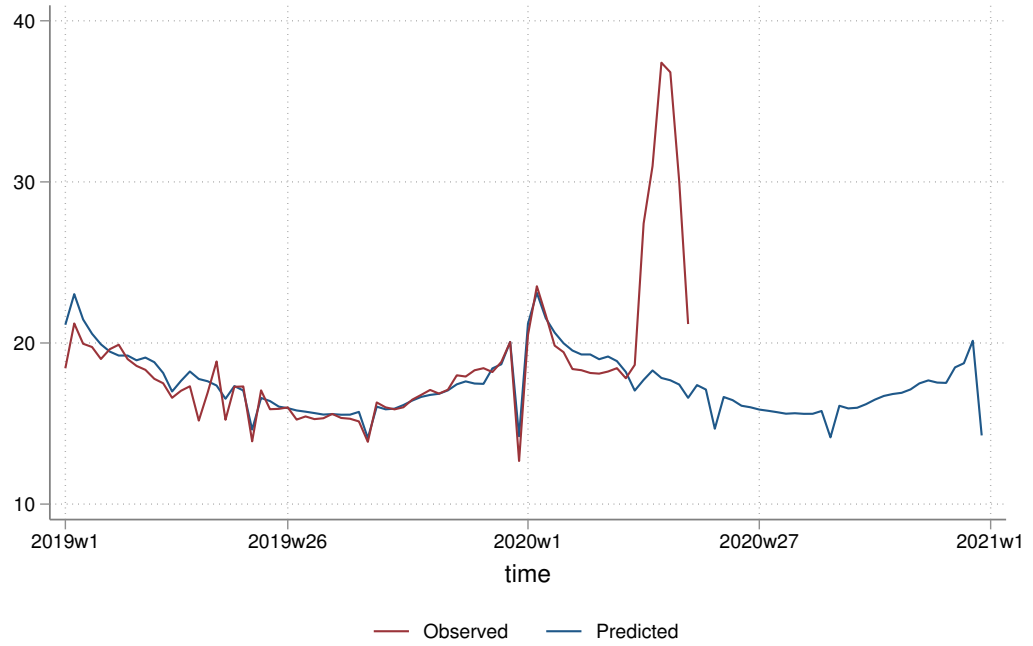

Figure 6: Mortality time trend and model, from 2020 week 1

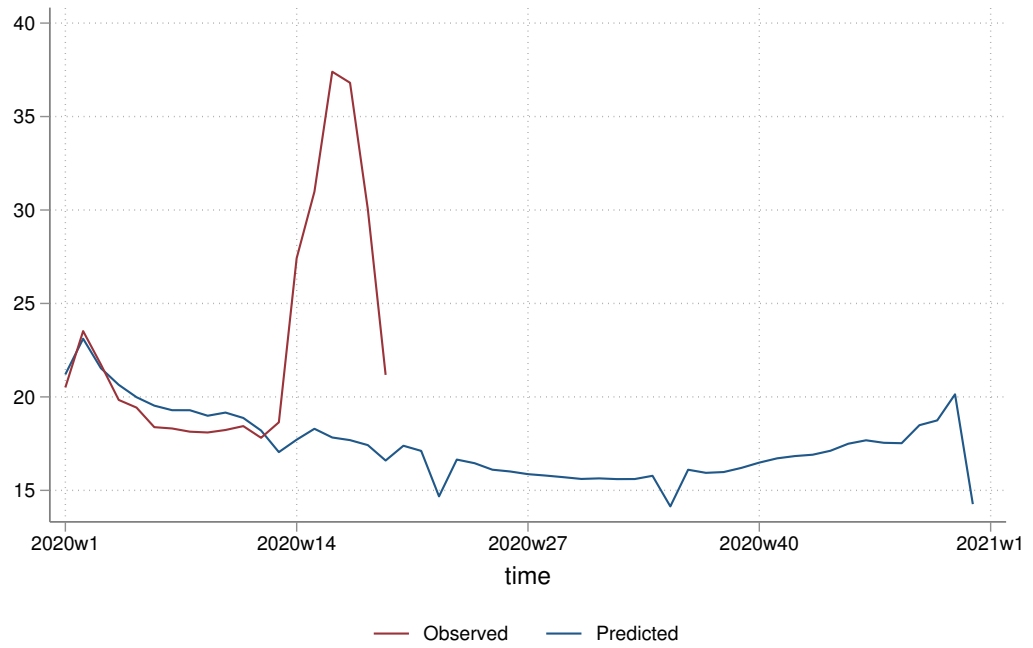

### 1.3 Excess number of deaths: all causes

Figure 7: All-cause excess deaths, from 2010 week 1

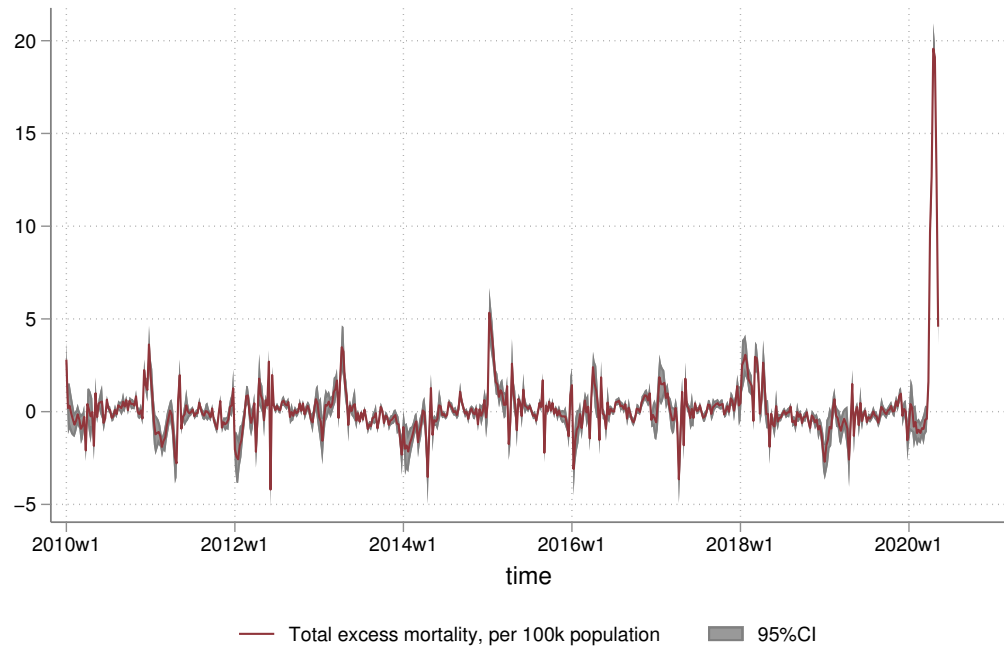

Figure 8: All-cause excess deaths, from 2019 week 1

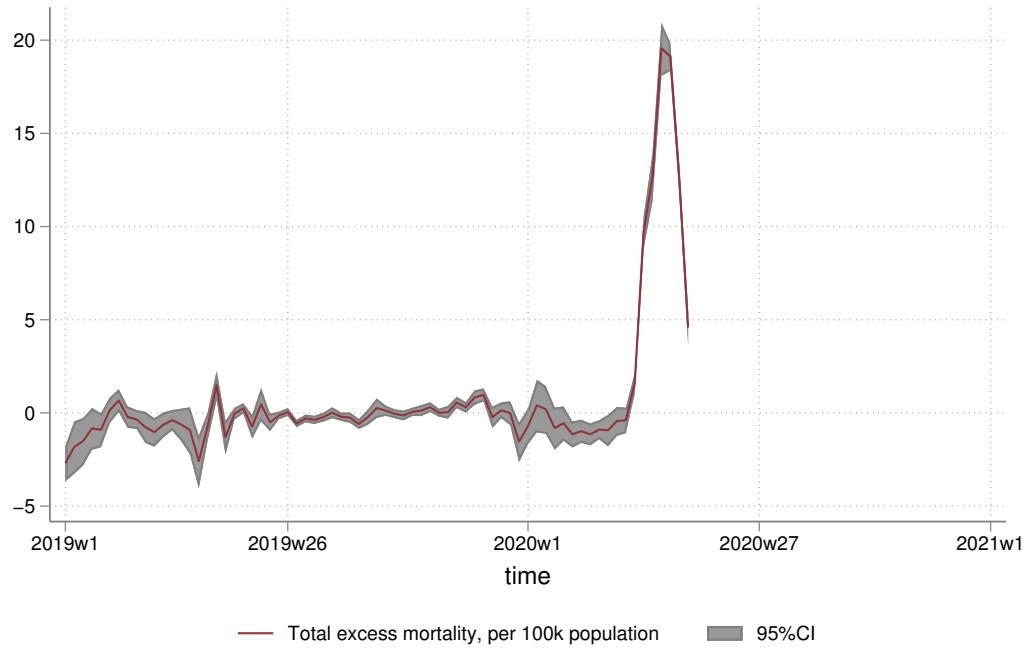

Figure 9: All-cause excess deaths, from 2020 week 1

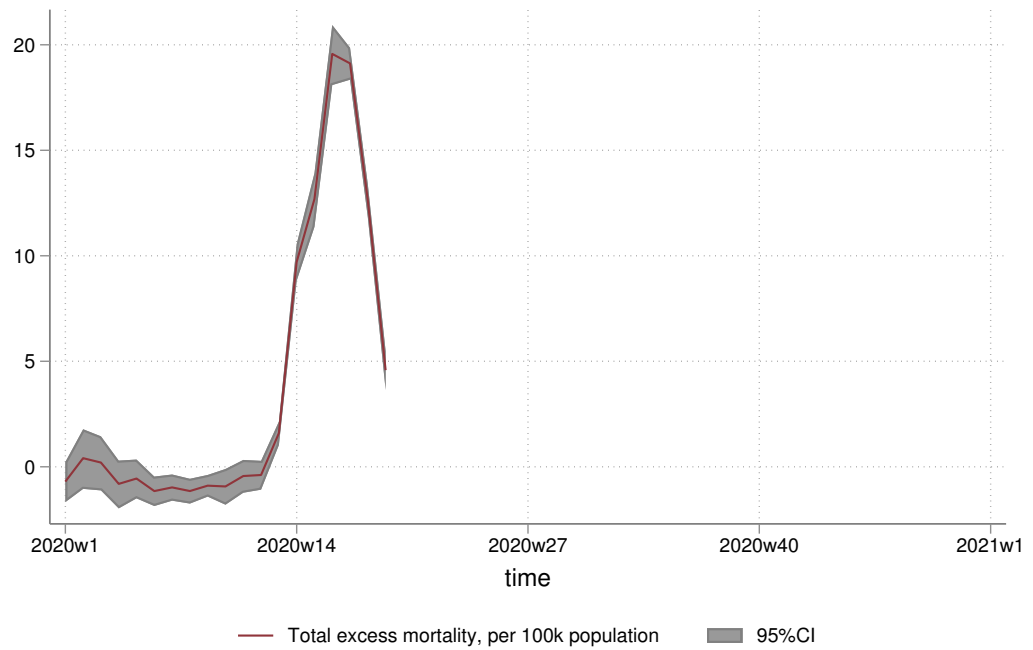

#### 1.4 Excess number of deaths: all causes minus COVID19 deaths

Excluding deaths where COVID19 was mentioned in the death certificate (ICD10 U07.1 and U07.2). A condition mentioned in the death certificate may be the main reason or a contributory reason to the cause of death.

Figure 10: All-cause excess deaths minus COVID19, from 2010 week 1

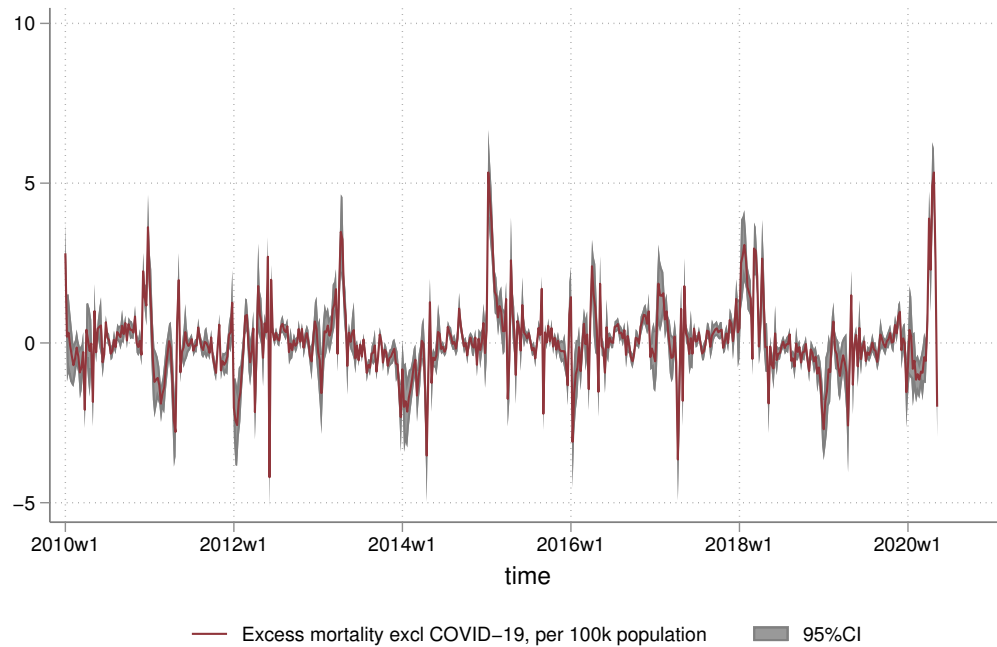

Figure 11: All-cause excess deaths minus COVID19, from 2019 week 1

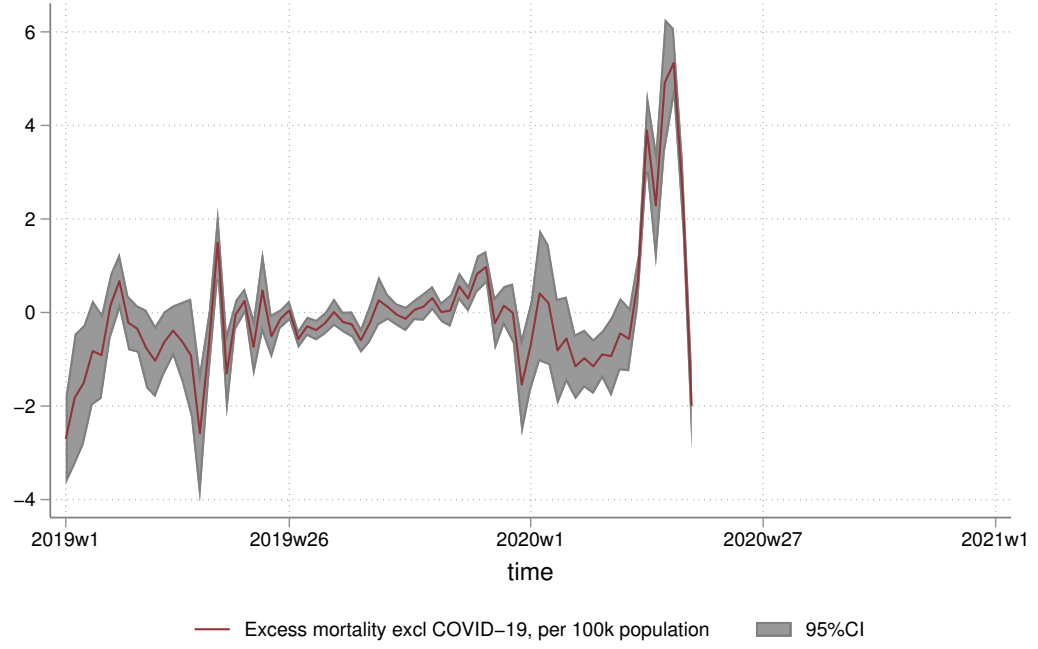

Figure 12: All-cause excess deaths minus COVID19, from 2020 week 1

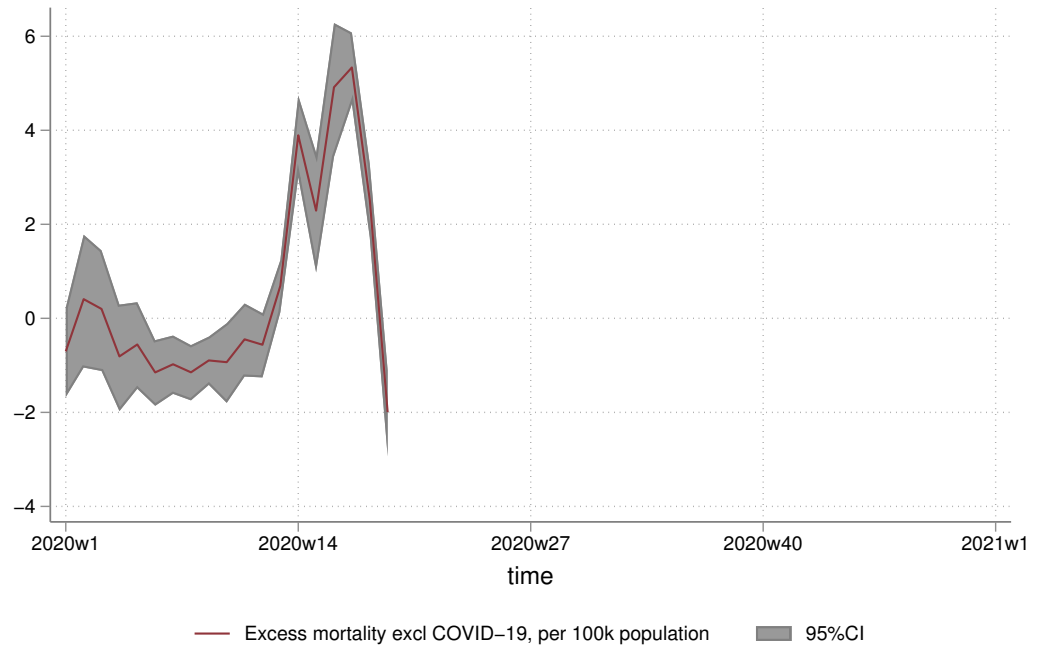

## 1.5 Excess number of deaths: all causes minus respiratory deaths

Excluding deaths where the underlying cause of death has been recorded as respiratory (ICD-10 codes J00-J99), and excluded deaths at age under 28 days. Underlying cause of death, as reported in England and Wales, is compatible with WHO recommendations using ICD rules (with small changes in 2011 and 2014), and is obtained from the death certificate. The underlying cause of death is defined by the WHO as the disease or injury that initiated the series of events that led directly to death, or the circumstances of the accident or violence that produced the fatal injury (ONS 2020).

Figure 13: All-cause excess deaths minus COVID19, from 2010 week 1

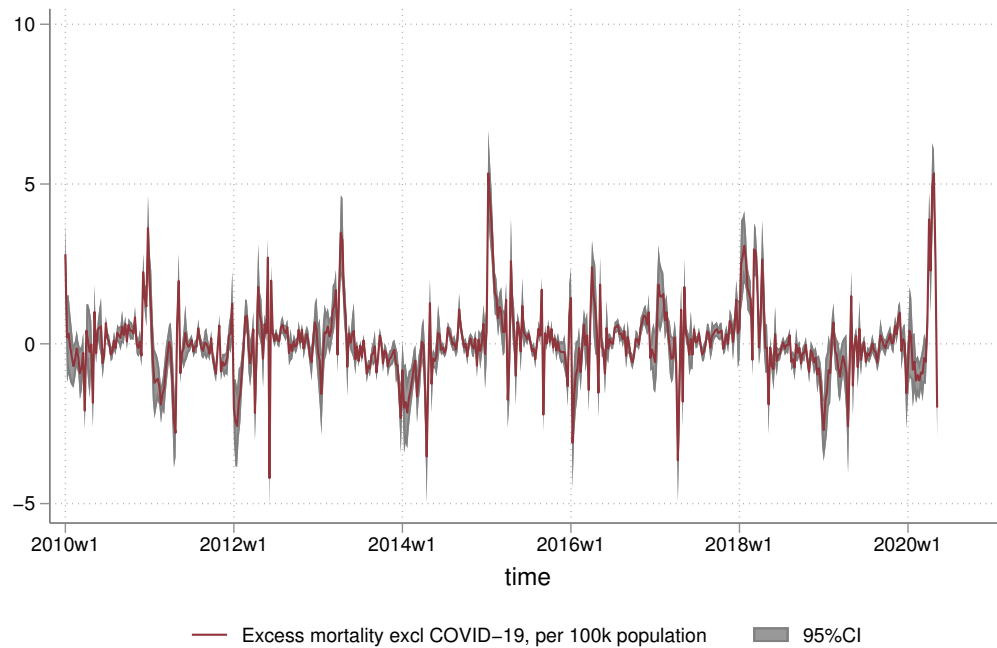

Figure 14: All-cause excess deaths minus COVID19, from 2019 week 1



Figure 15: All-cause excess deaths minus COVID19, from 2020 week 1





## 2 Regional, per 100k population

### 2.1 Time trends

Figure 16: Regional mortality time trends, from 2010 week 1

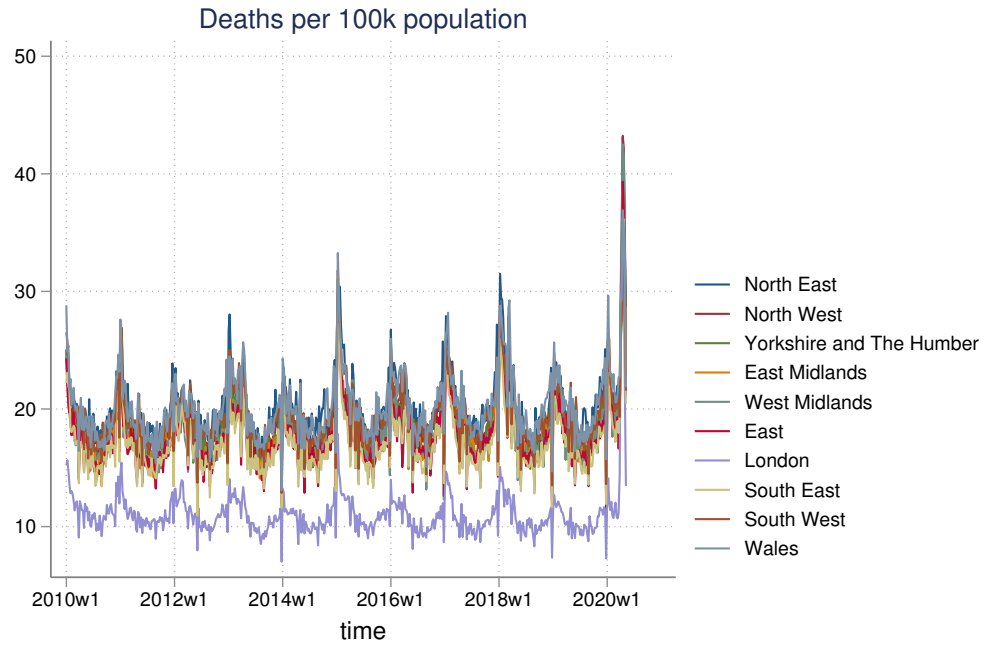

Figure 17: Regional mortality time trends, from 2019 week 1

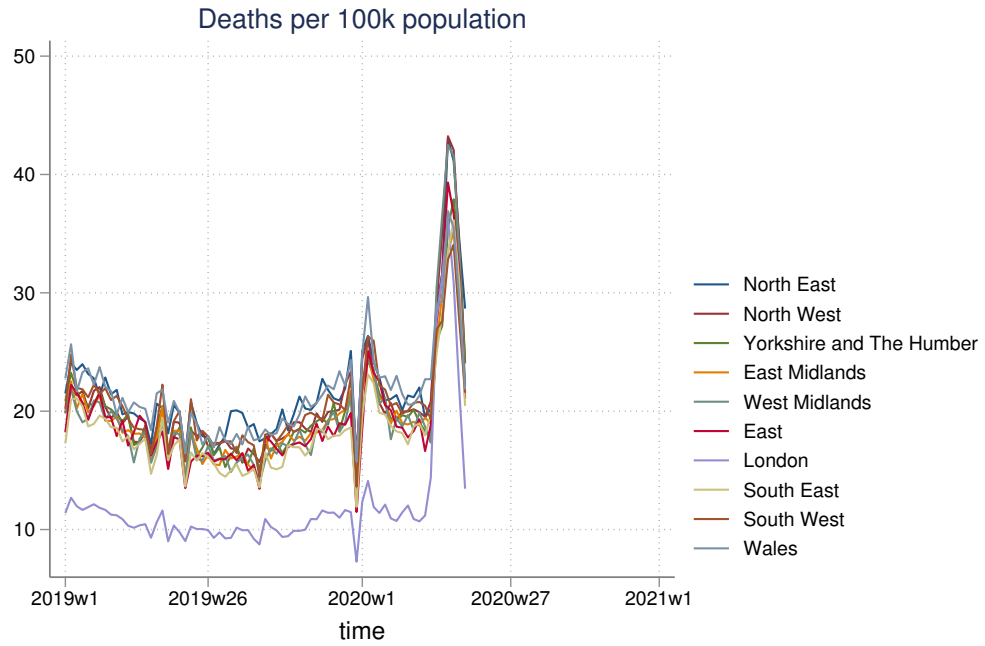

Figure 18: Regional mortality time trends, from 2020 week 1

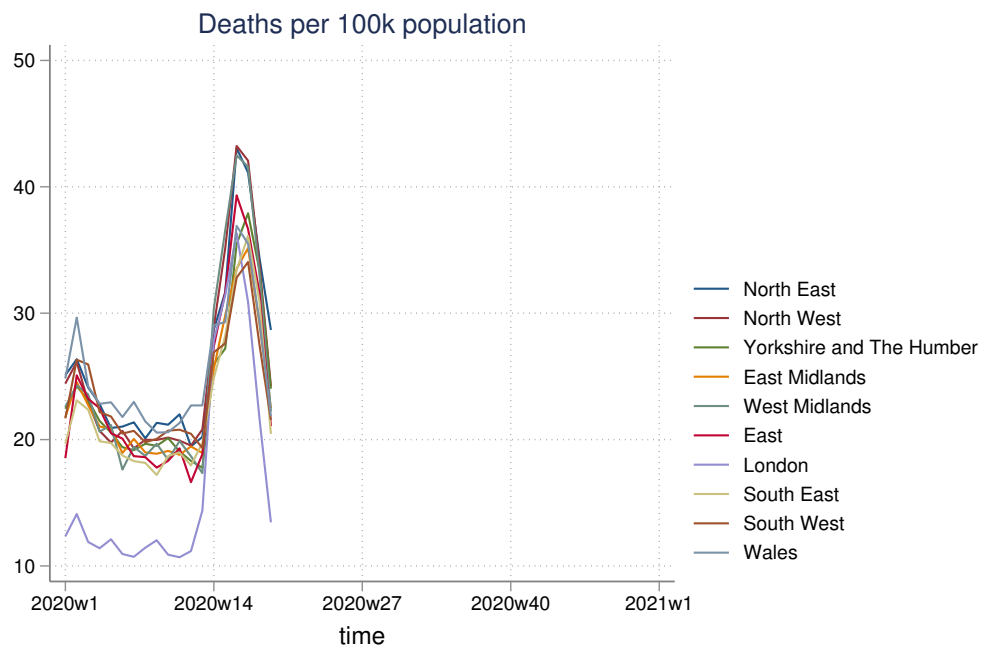

## 2.2 North East

Figure 19: NE Mortality time trend and model, from 2010 week 1

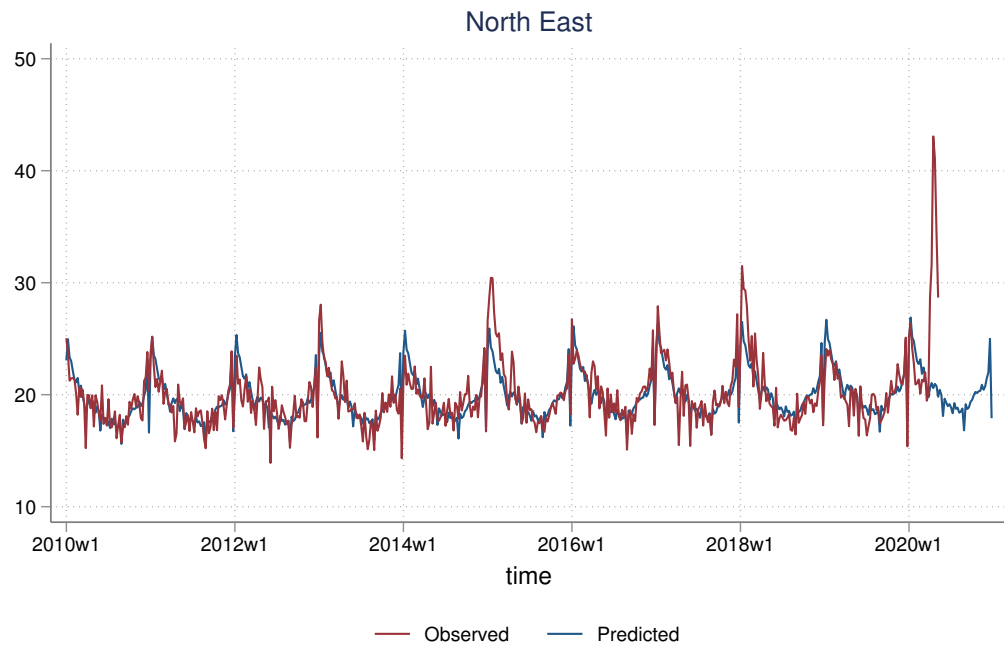

Figure 20: NE Mortality time trend and model, from 2019 week 1

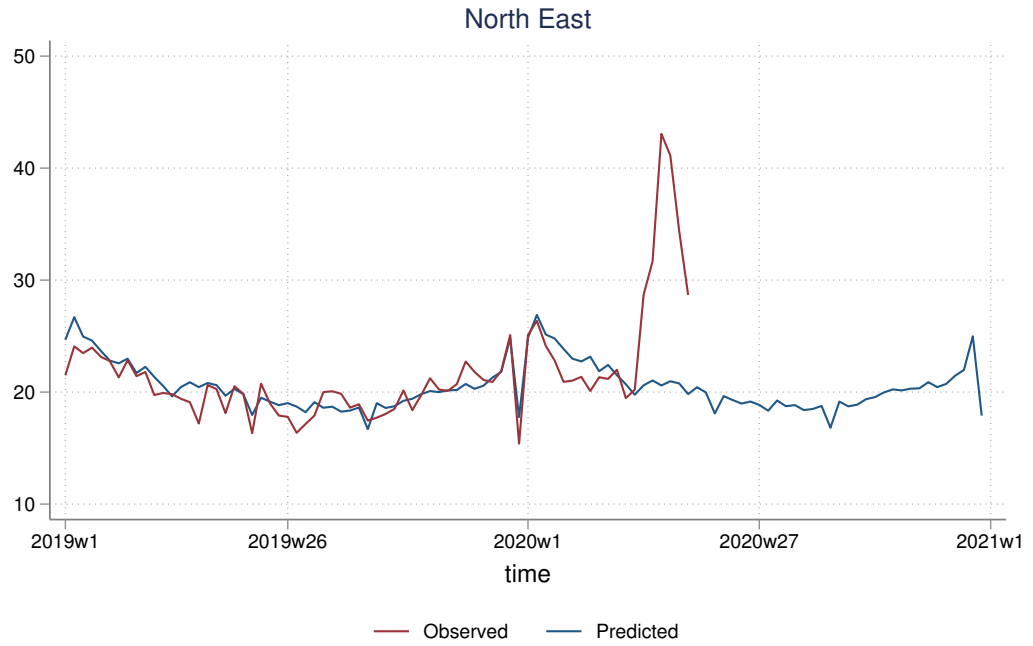

Figure 21: NE Mortality time trend and model, from 2020 week 1

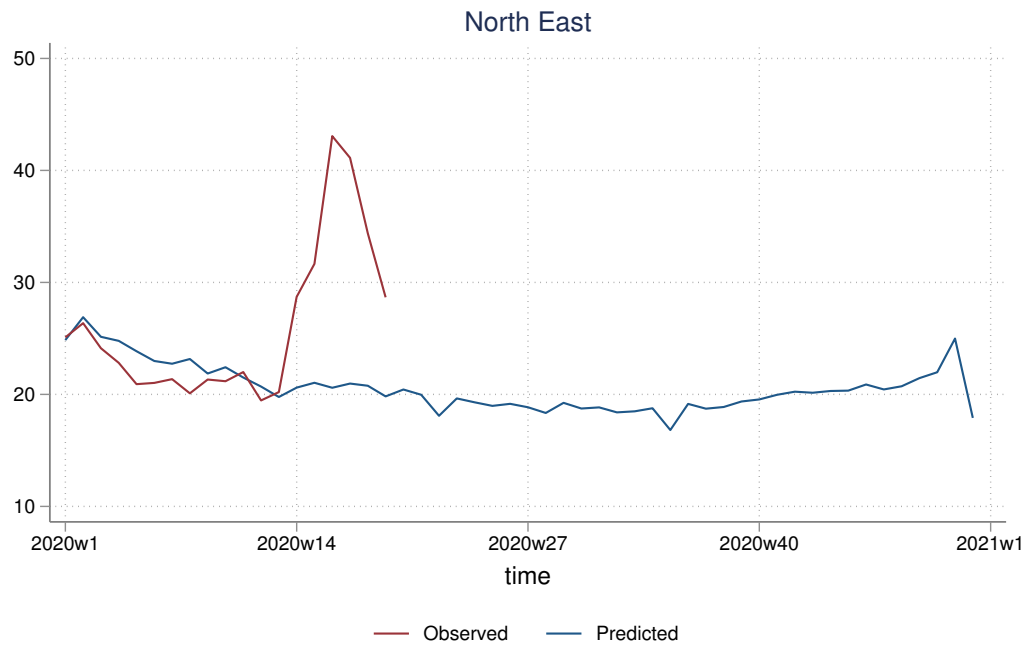

Figure 22: NE all-cause excess deaths, from 2010 week 1

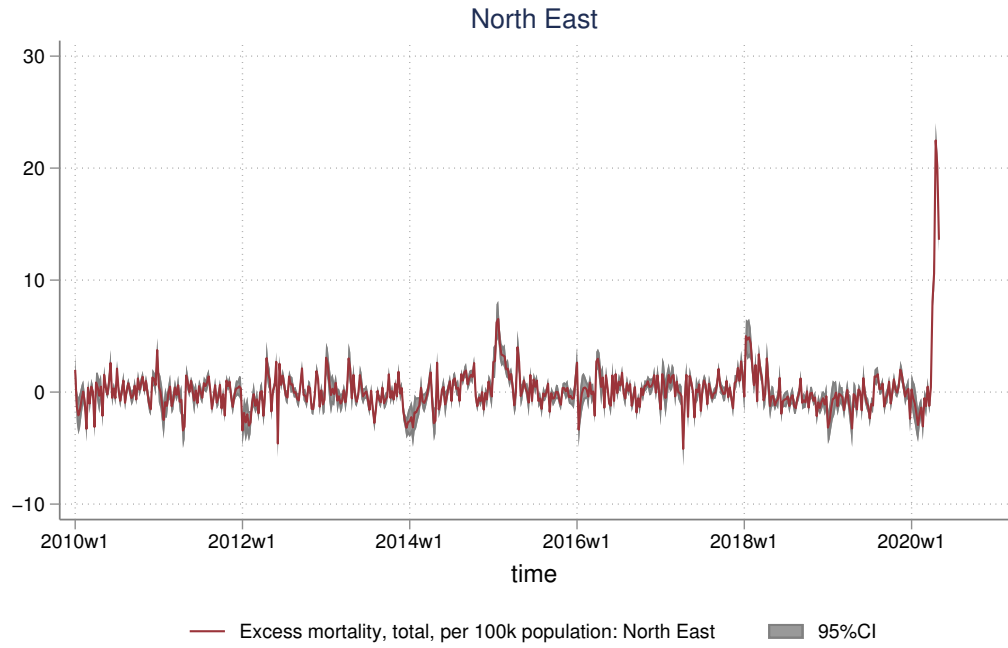

Figure 23: NE all-cause excess deaths, from 2019 week 1

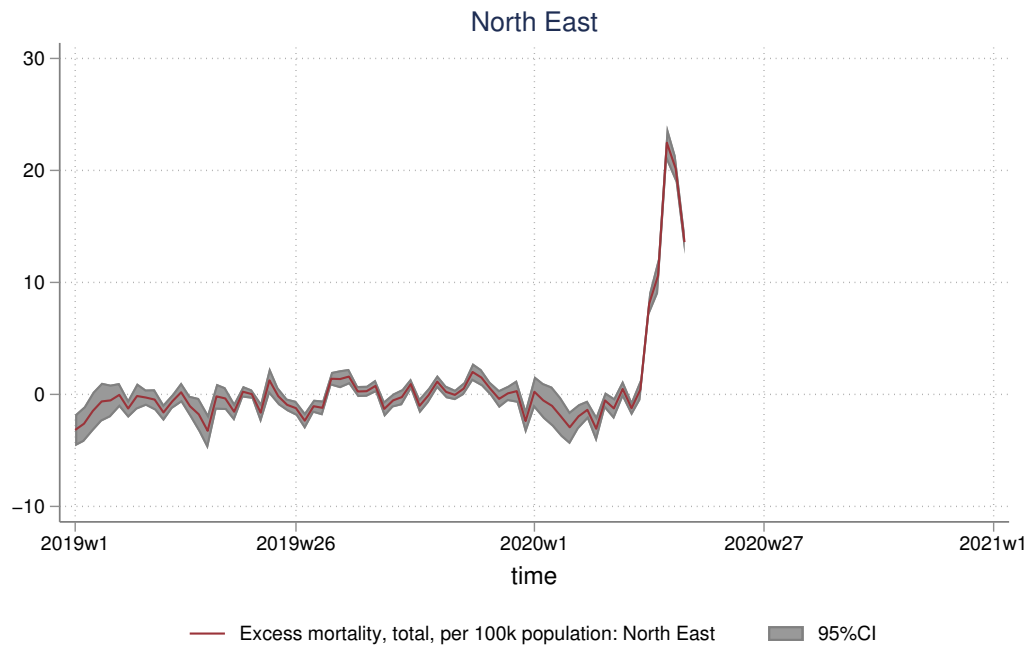

Figure 24: NE all-cause excess deaths, from 2020 week 1

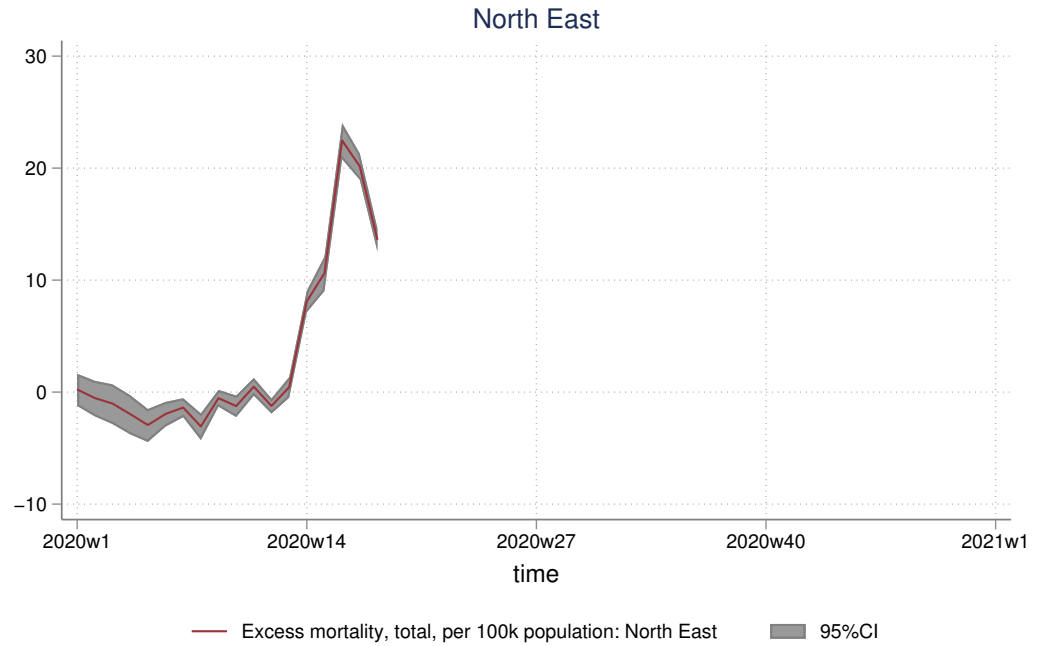

Figure 25: NE all-cause excess deaths minus COVID19, from 2010 week 1

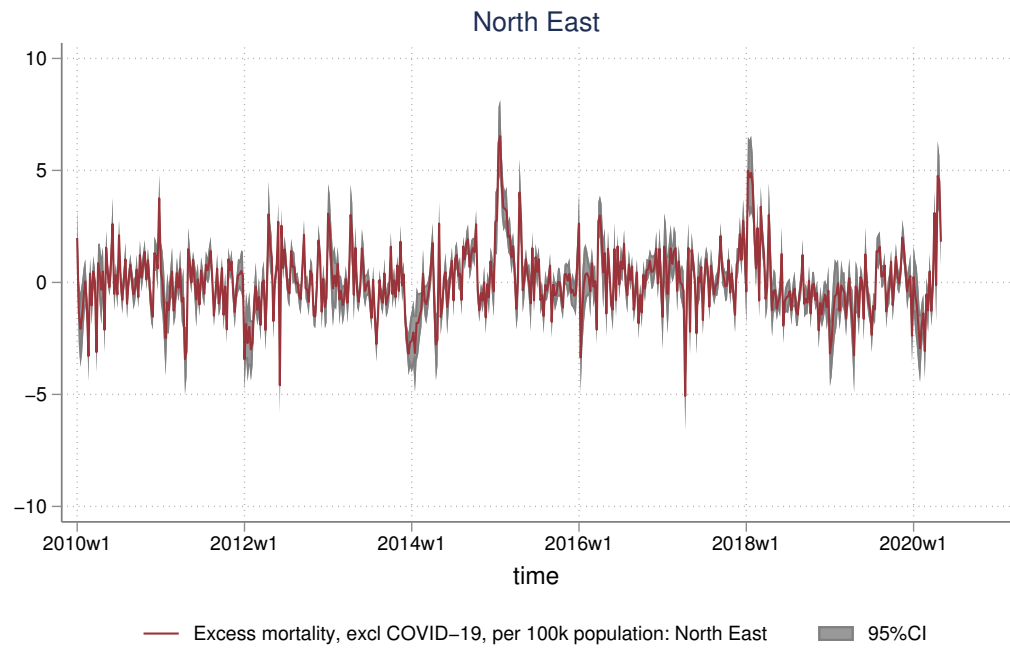

Figure 26: NE all-cause excess deaths minus COVID19, from 2019 week 1

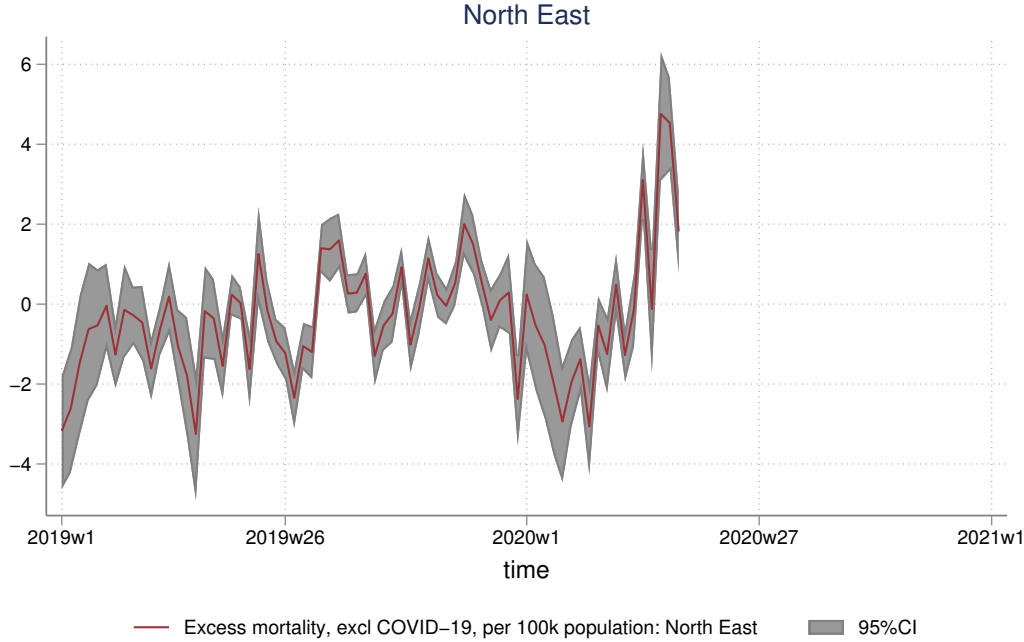

Figure 27: NE all-cause excess deaths minus COVID19, from 2020 week 1

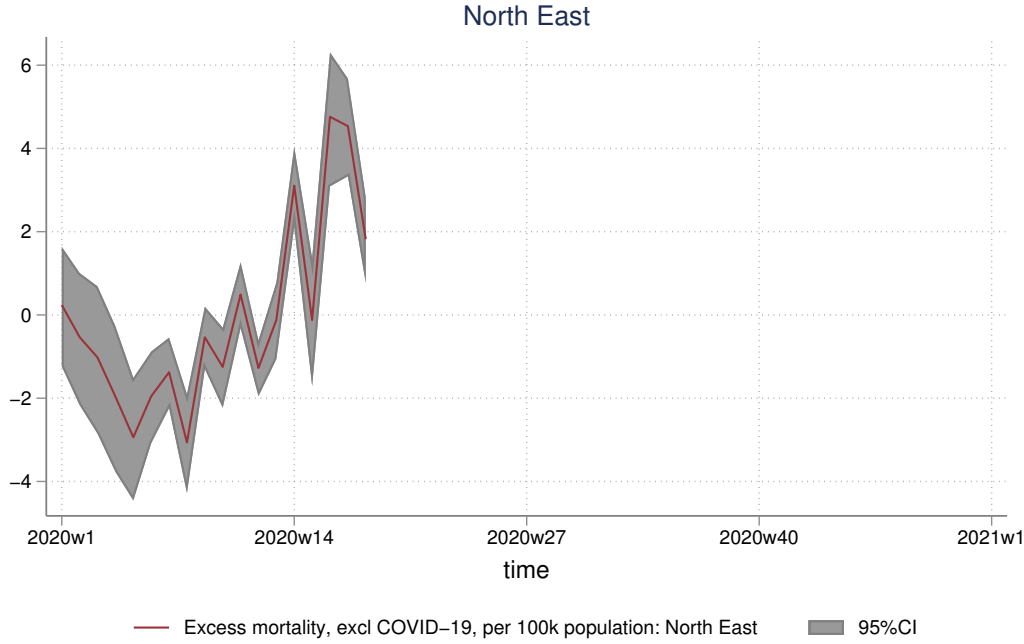

### 2.3 North West

Figure 28: NW Mortality time trend and model, from 2010 week 1

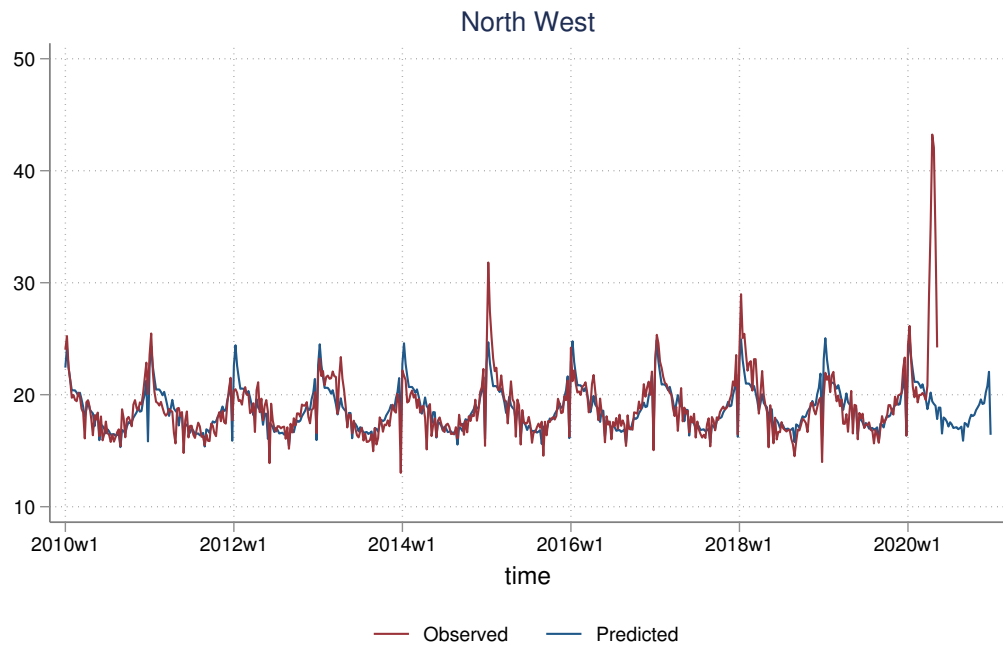



Figure 29: NW Mortality time trend and model, from 2019 week 1

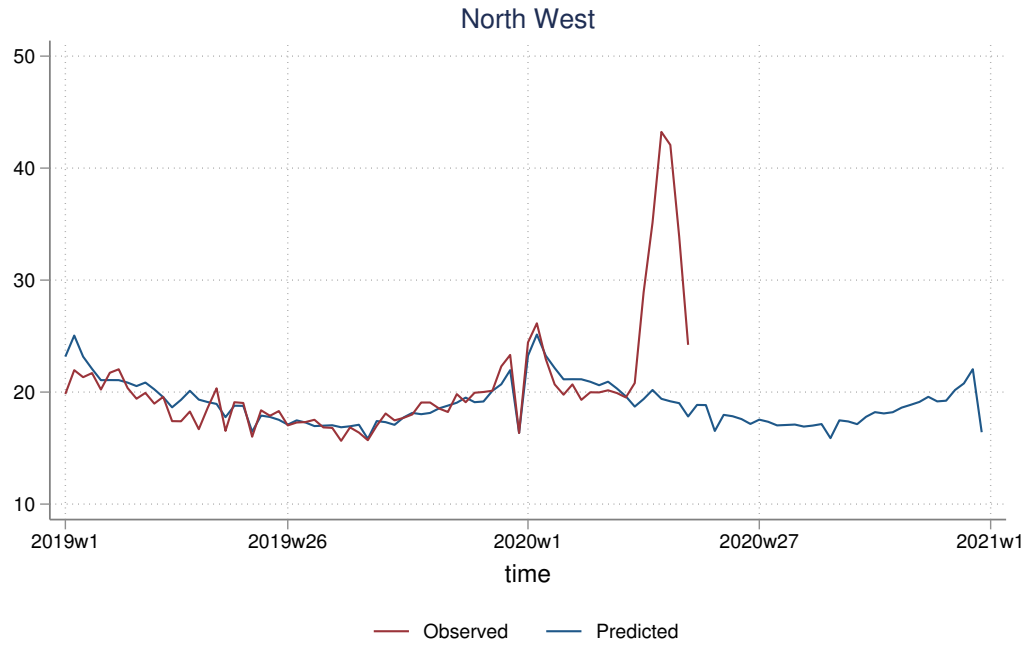

Figure 30: NW Mortality time trend and model, from 2020 week 1

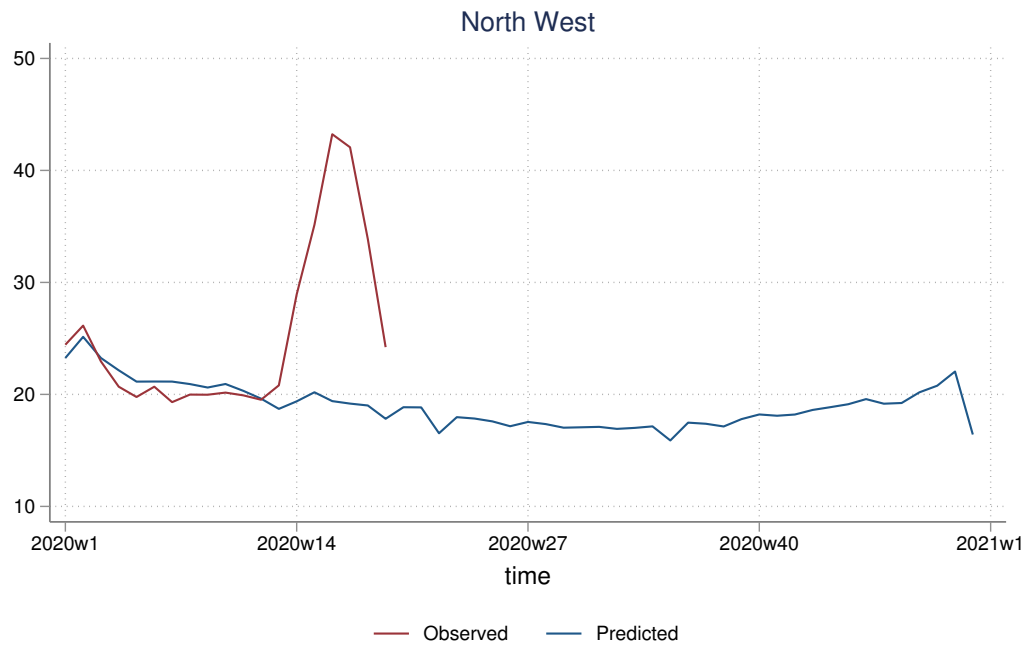

Figure 31: NW all-cause excess deaths, from 2010 week 1

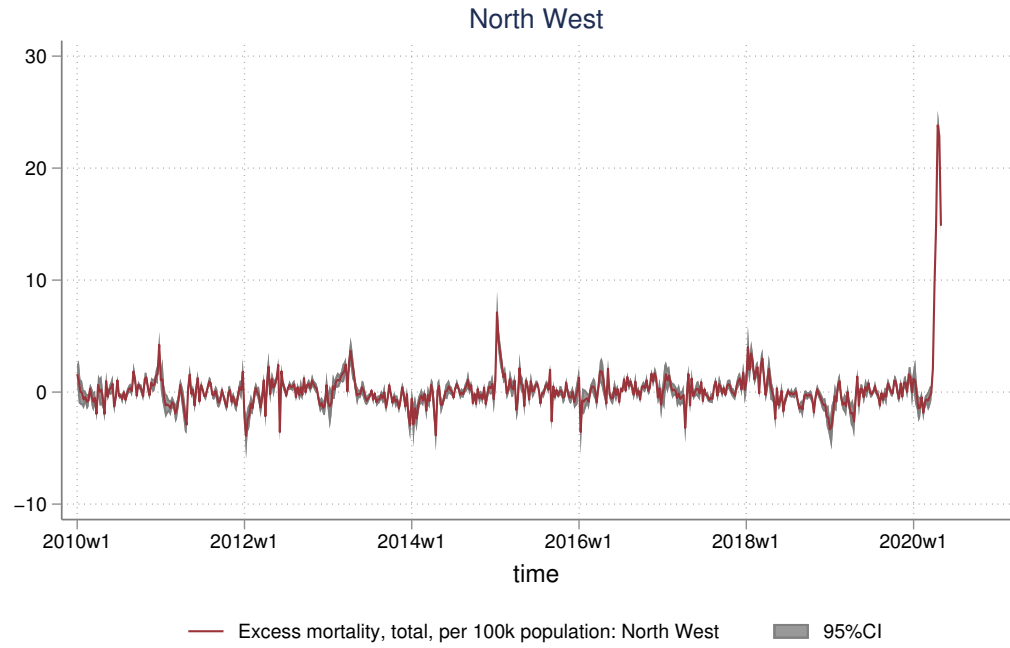

Figure 32: NW all-cause excess deaths, from 2019 week 1

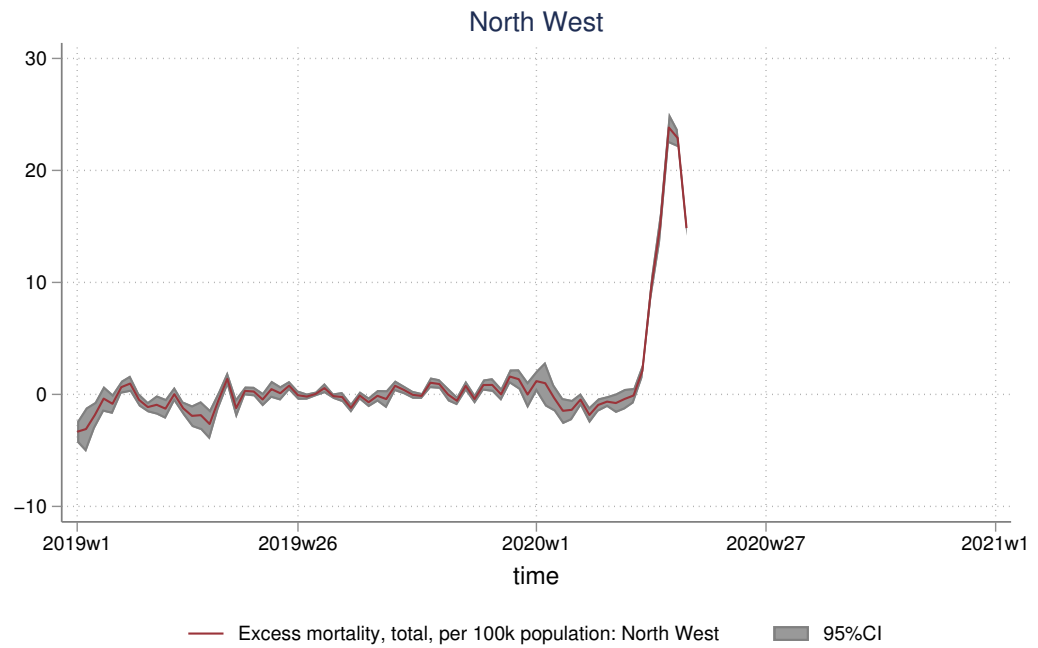

Figure 33: NW all-cause excess deaths, from 2020 week 1

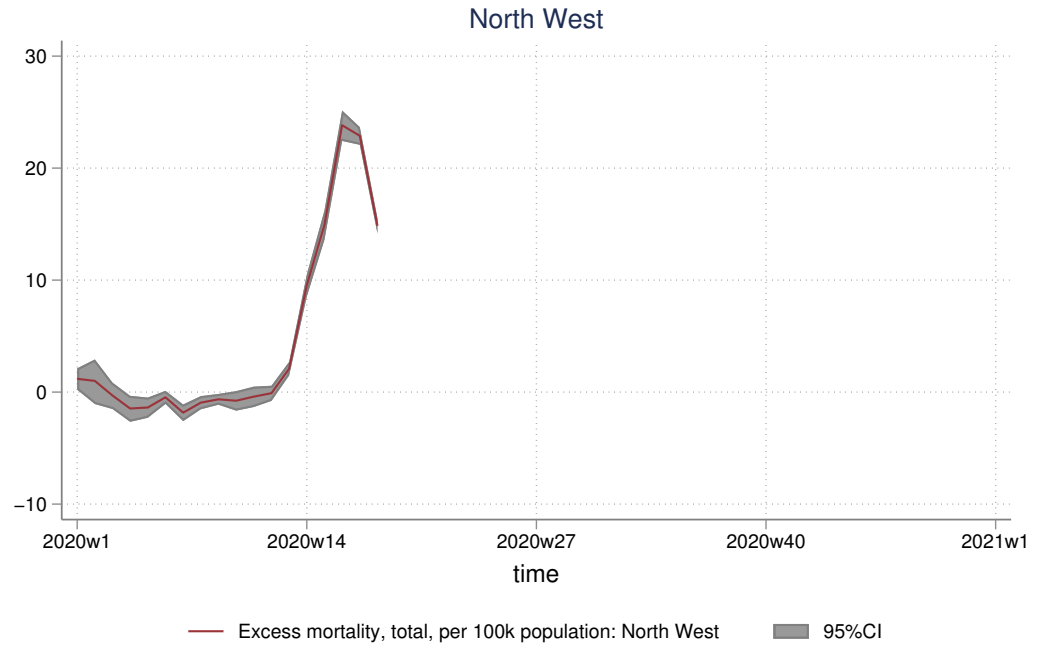

Figure 34: NW all-cause excess deaths minus COVID19, from 2010 week 1

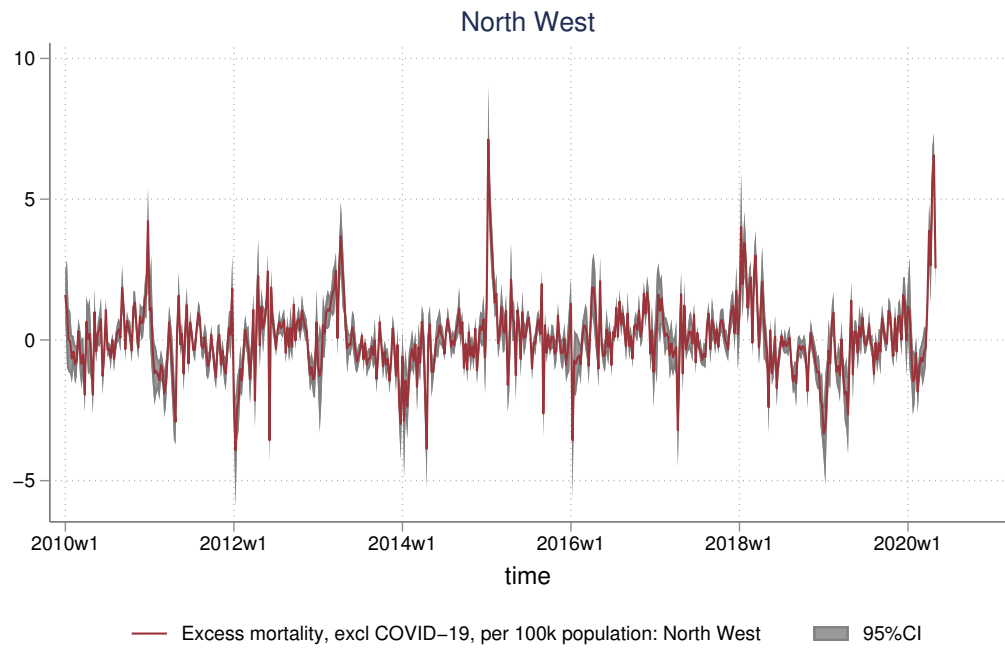

Figure 35: NW all-cause excess deaths minus COVID19, from 2019 week 1

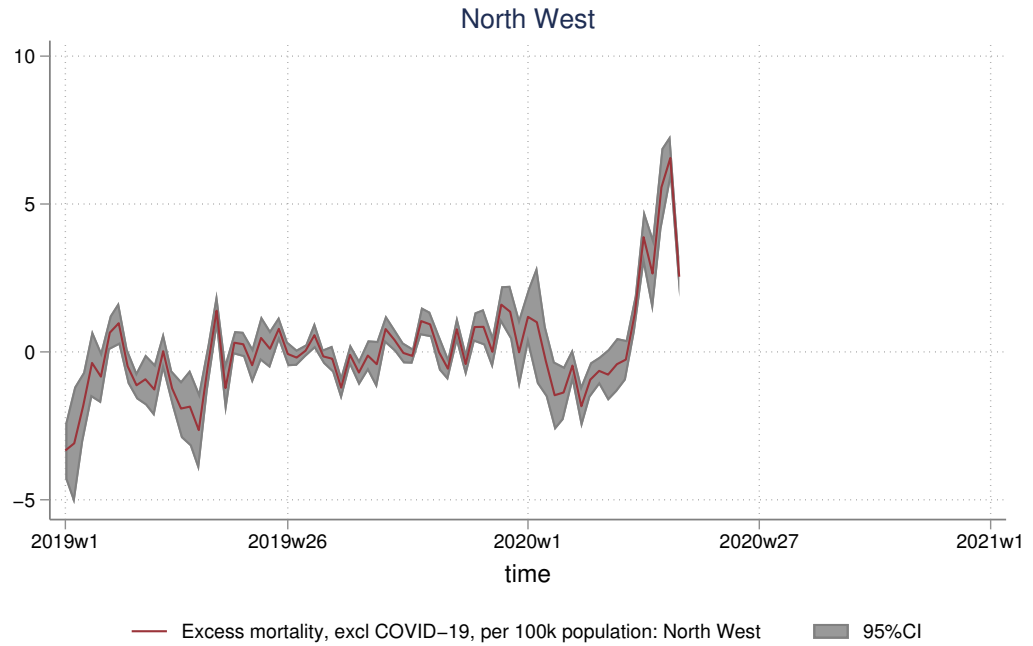

Figure 36: NW all-cause excess deaths minus COVID19, from 2020 week 1

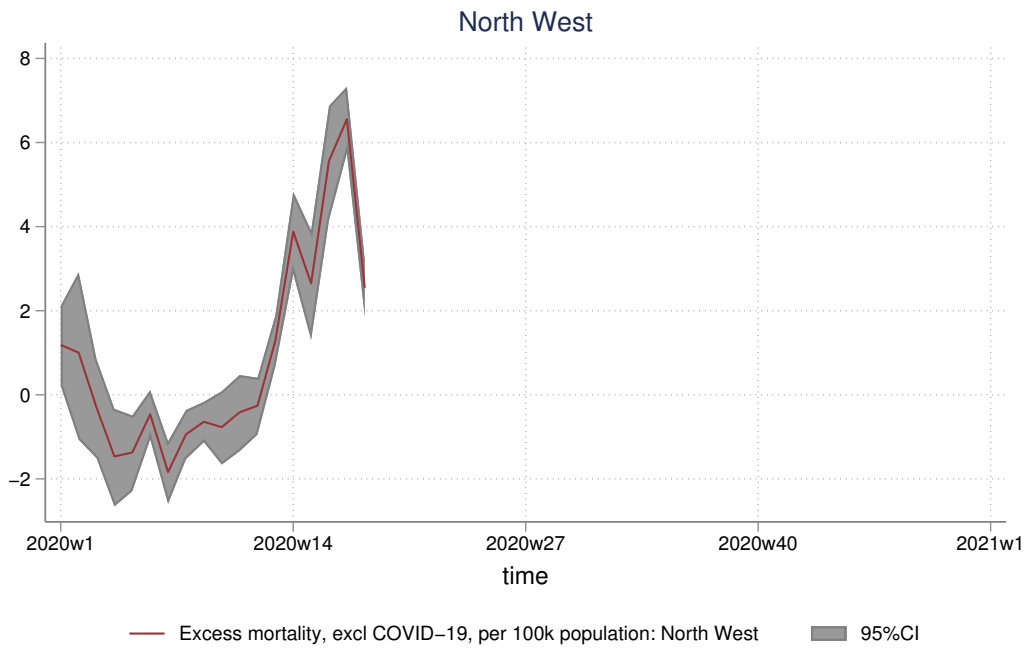

## 2.4 Yorkshire and the Humber

Figure 37: YatH Mortality time trend and model, from 2010 week 1

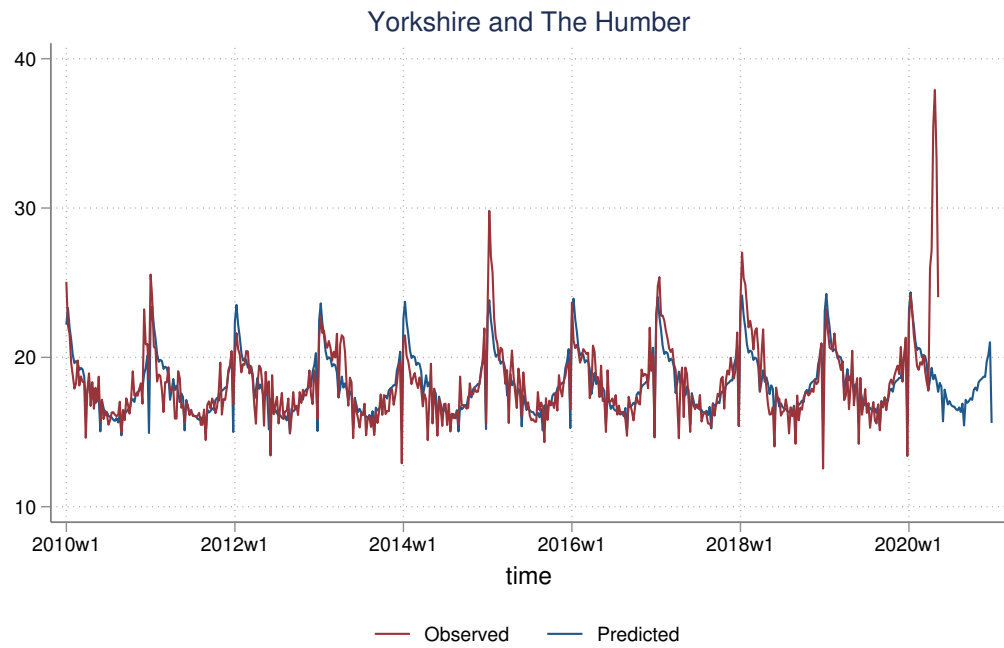

Figure 38: YathMortality time trend and model, from 2019 week 1

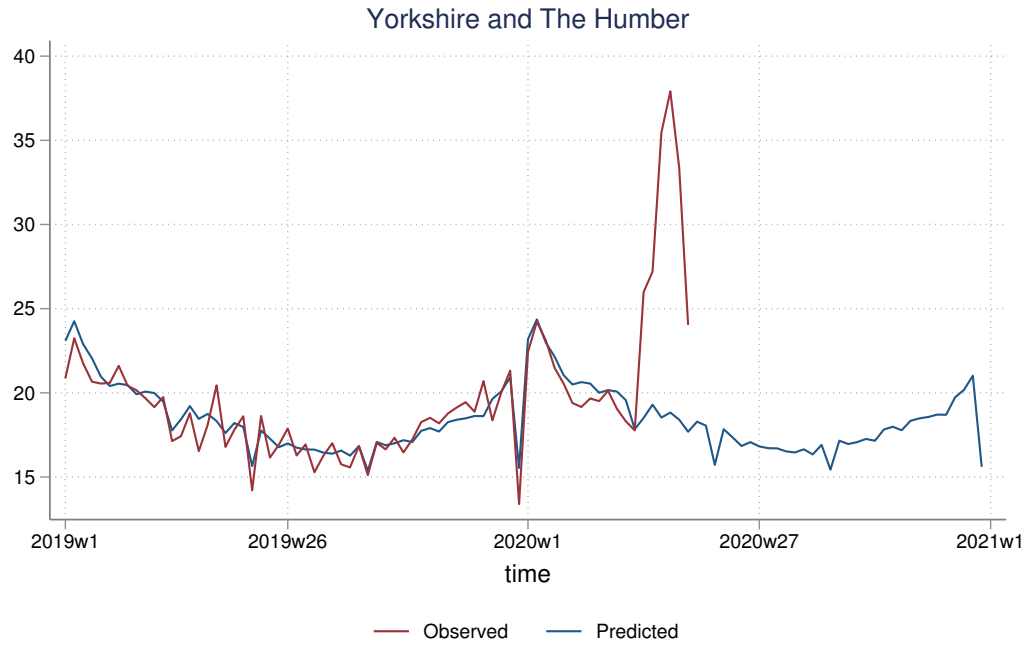

Figure 39: YathMortality time trend and model, from 2020 week 1

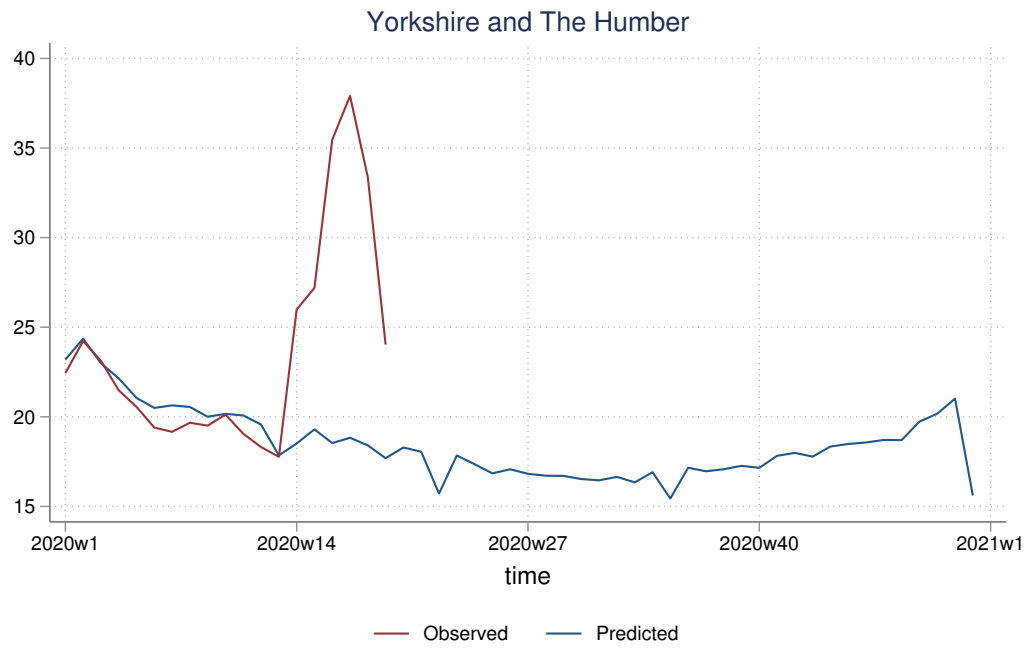

Figure 40: YatH all-cause excess deaths, from 2010 week 1

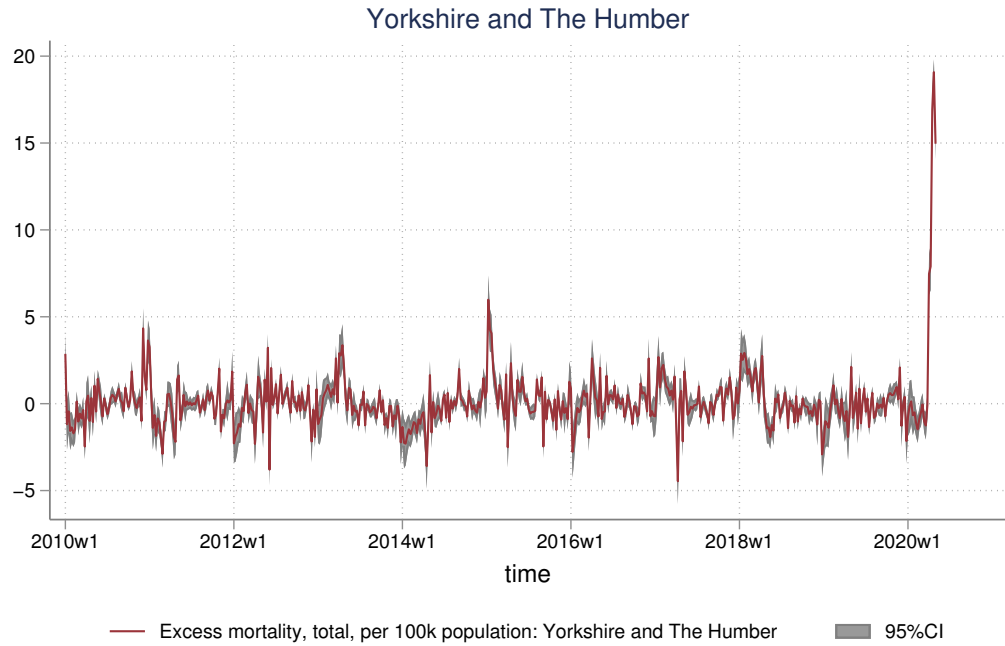

Figure 41: YatH all-cause excess deaths, from 2019 week 1

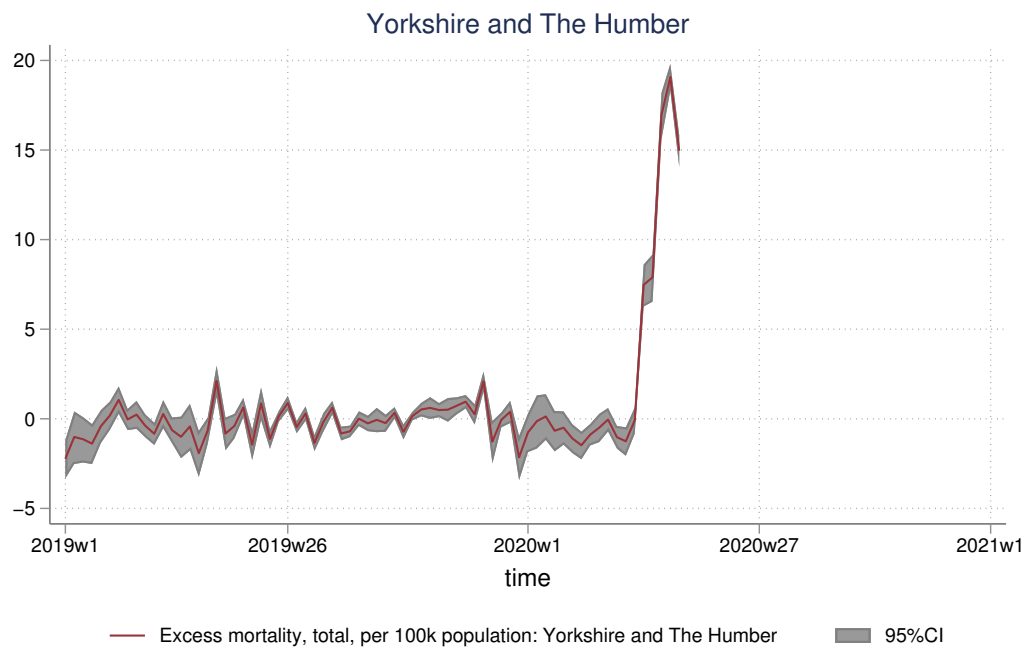

Figure 42: YatH all-cause excess deaths, from 2020 week 1

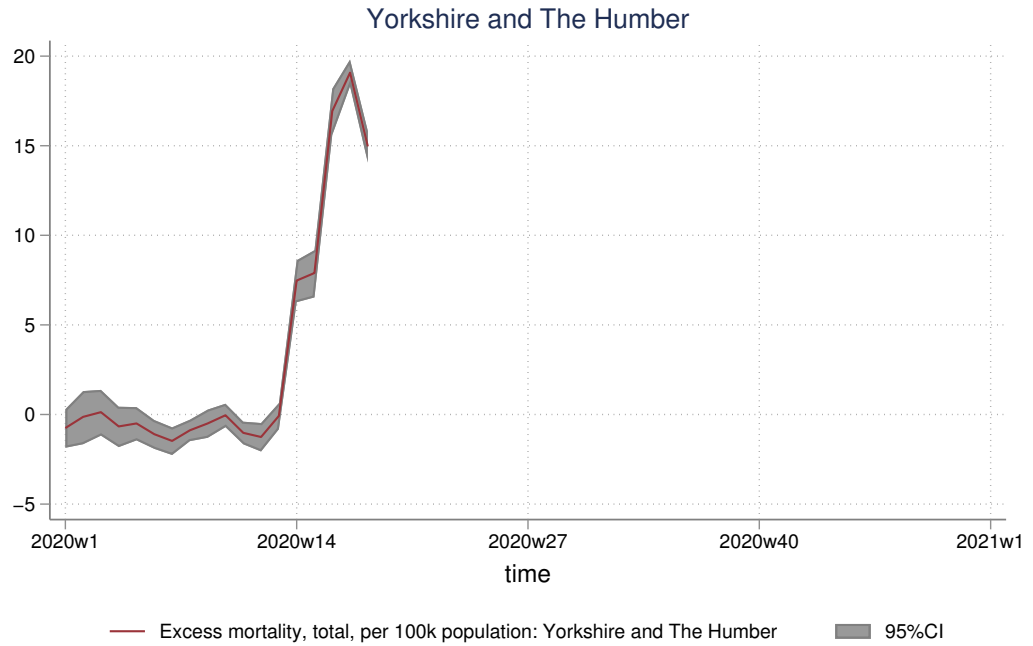

Figure 43: YatH all-cause excess deaths minus COVID19, from 2010 week 1

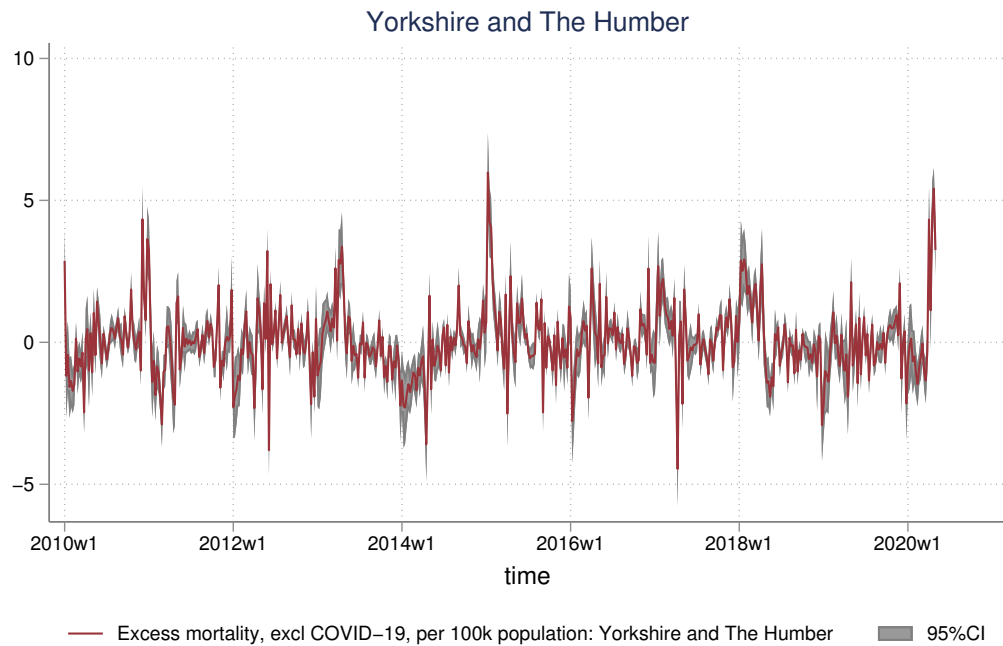



Figure 44: YatH all-cause excess deaths minus COVID19, from 2019 week 1

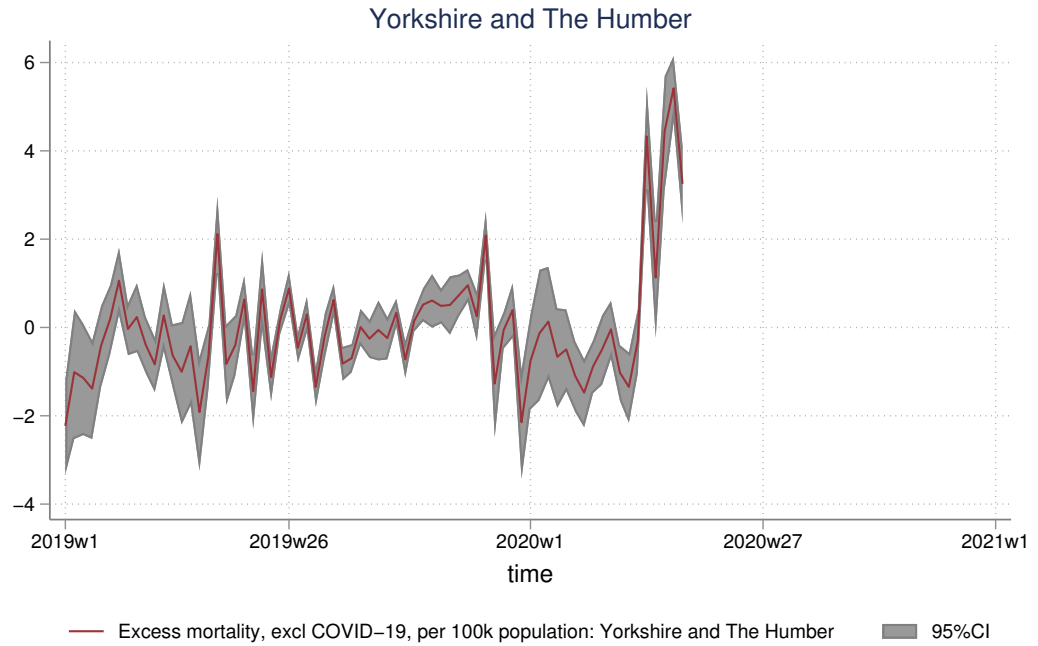

Figure 45: YatH all-cause excess deaths minus COVID19, from 2020 week 1

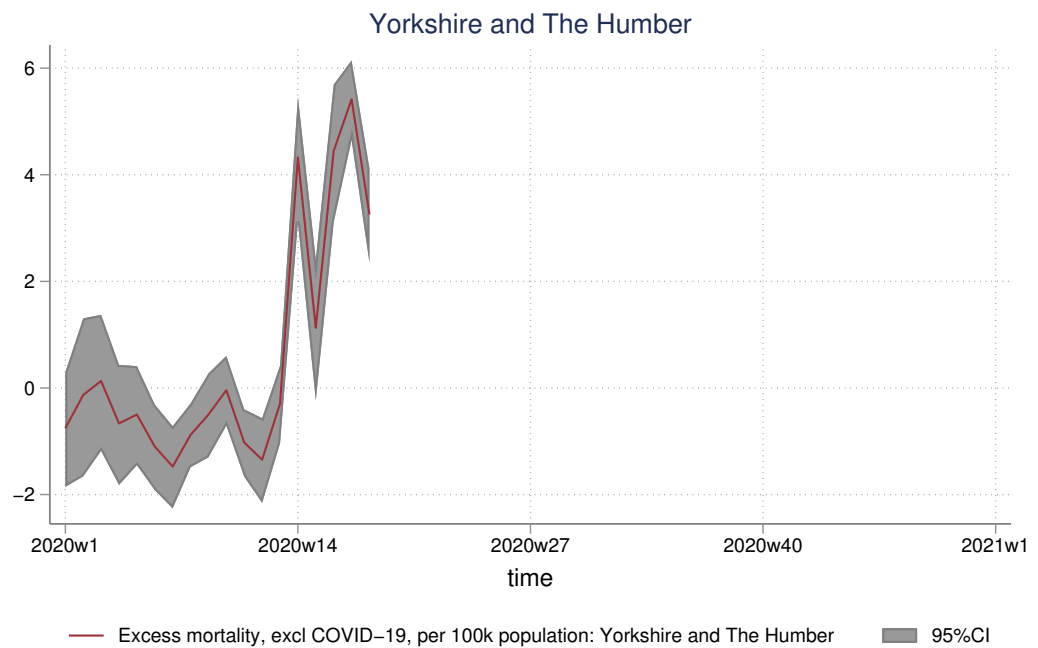

## 2.5 East Midlands

Figure 46: EMD Mortality time trend and model, from 2010 week 1

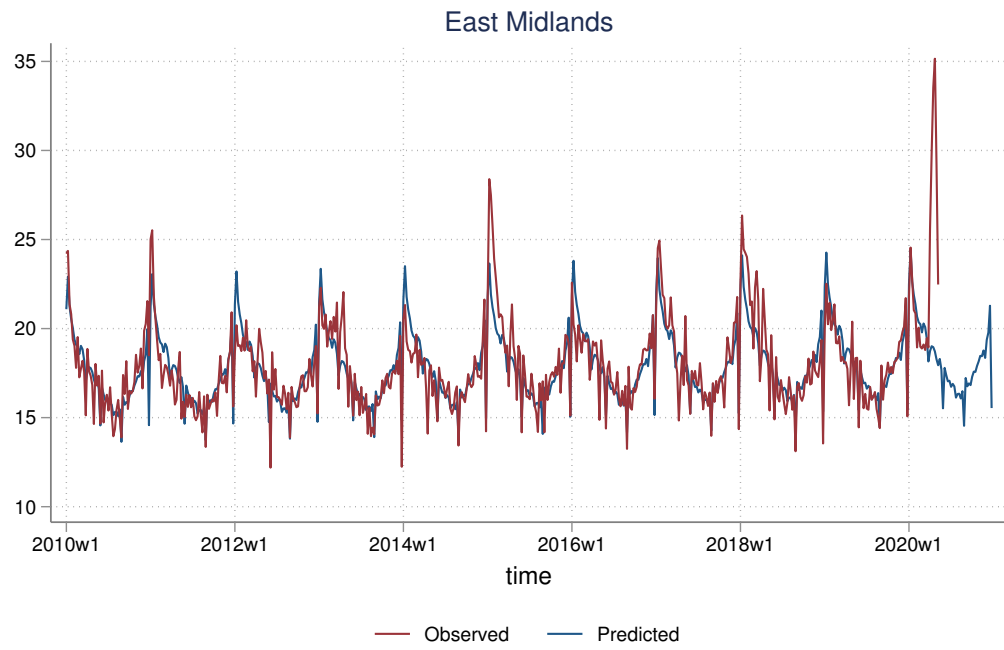

Figure 47: EMD Mortality time trend and model, from 2019 week 1

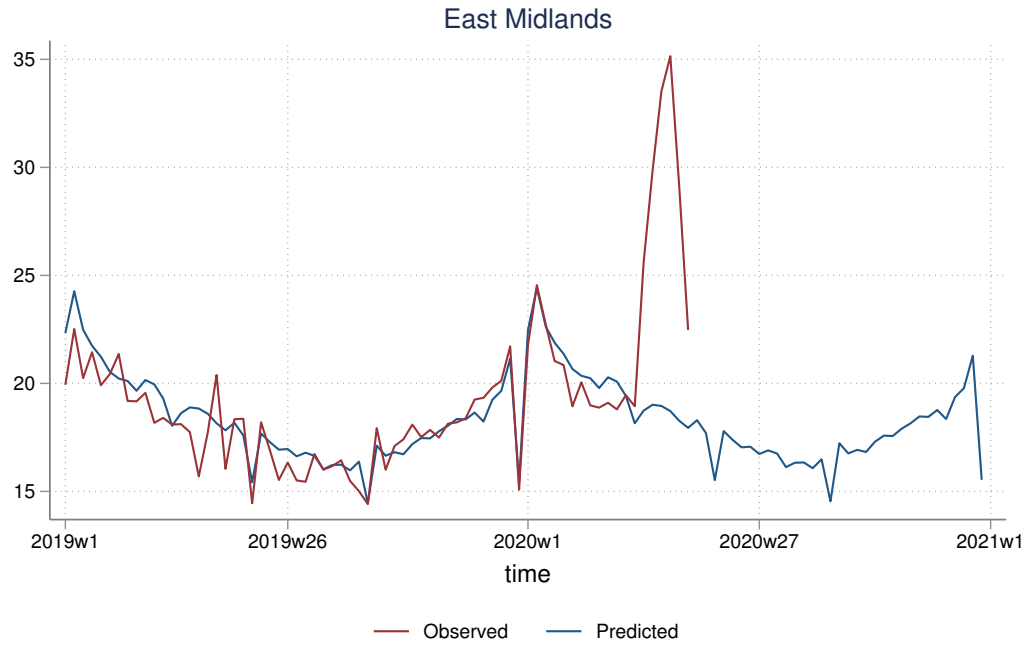

Figure 48: EMD Mortality time trend and model, from 2020 week 1

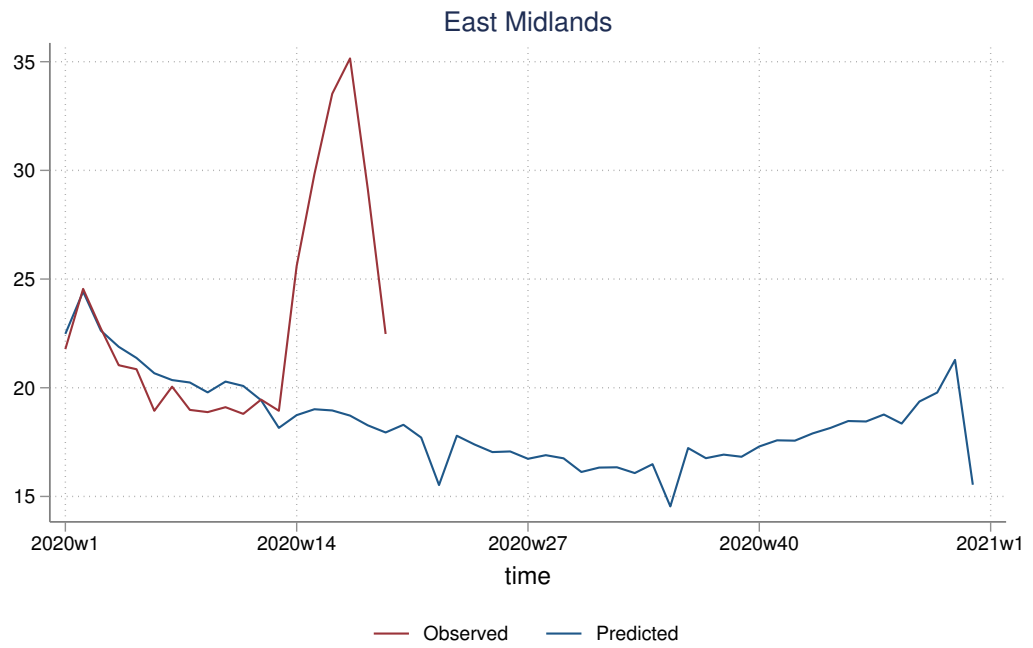

Figure 49: EMD all-cause excess deaths, from 2010 week 1

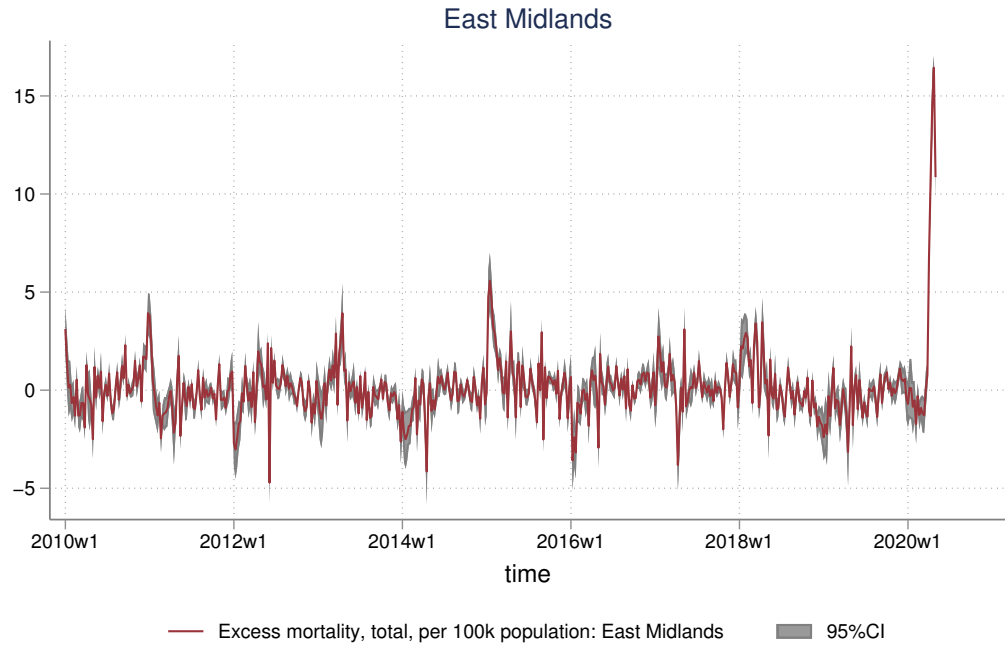

Figure 50: EMD all-cause excess deaths, from 2019 week 1

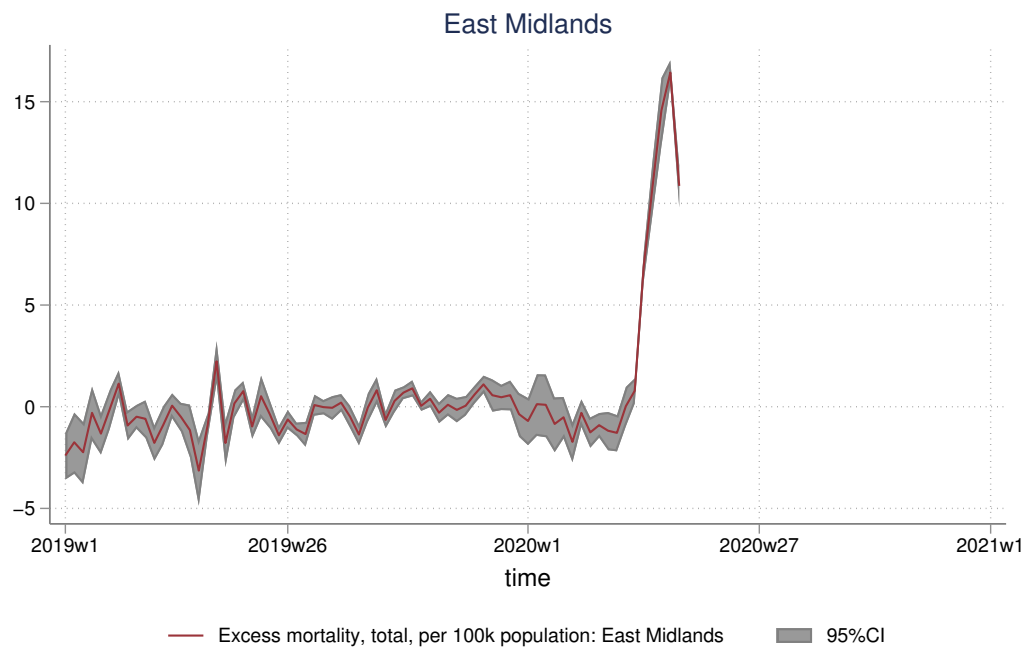

Figure 51: EMD all-cause excess deaths, from 2020 week 1

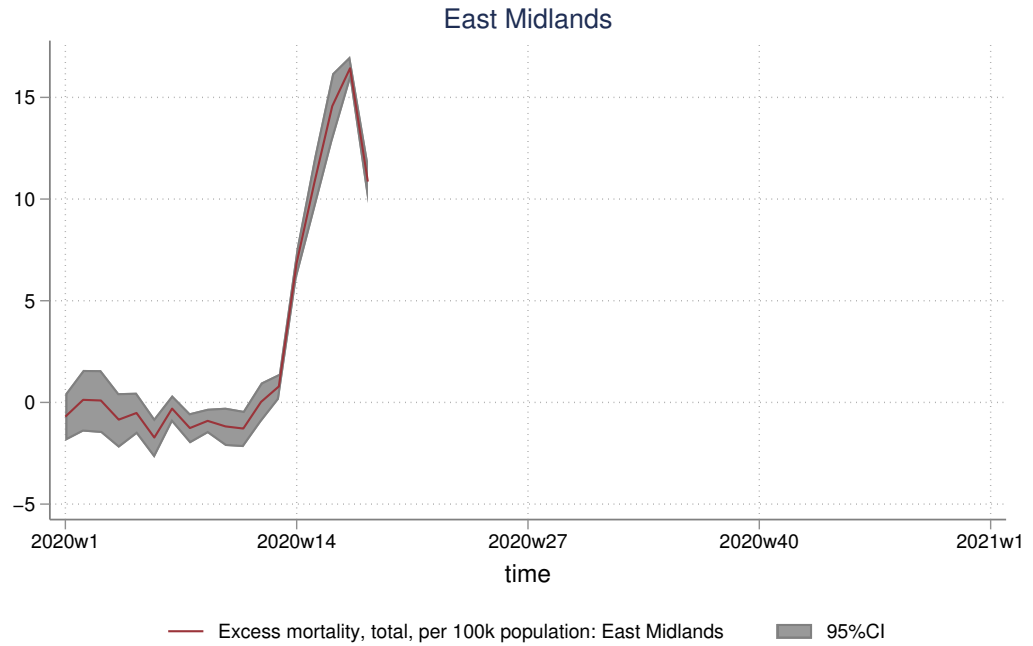

Figure 52: EMD all-cause excess deaths minus COVID19, from 2010 week 1

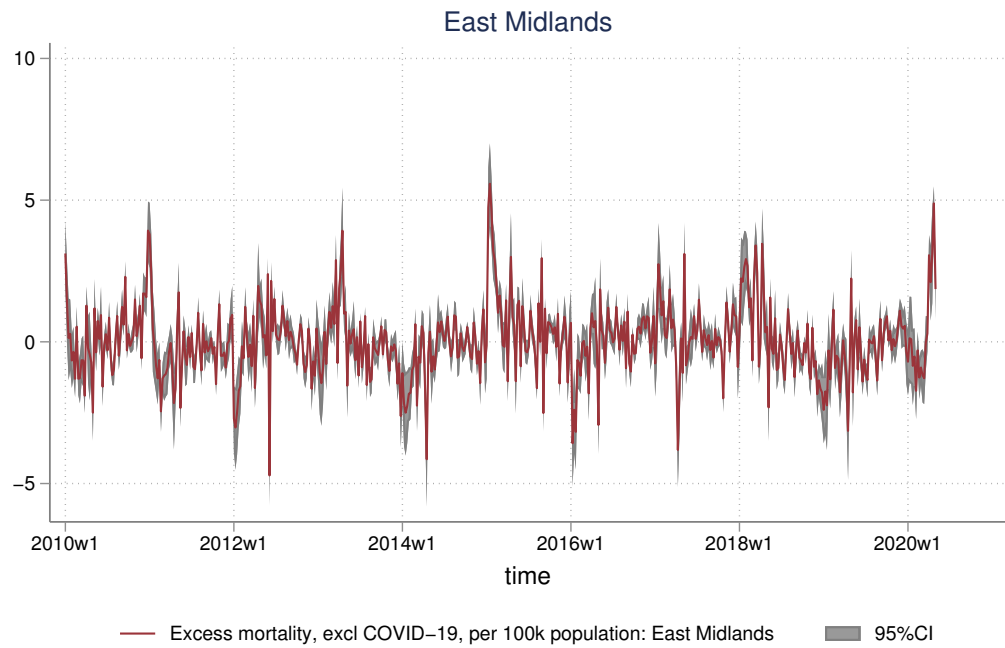

Figure 53: EMD all-cause excess deaths minus COVID19, from 2019 week 1

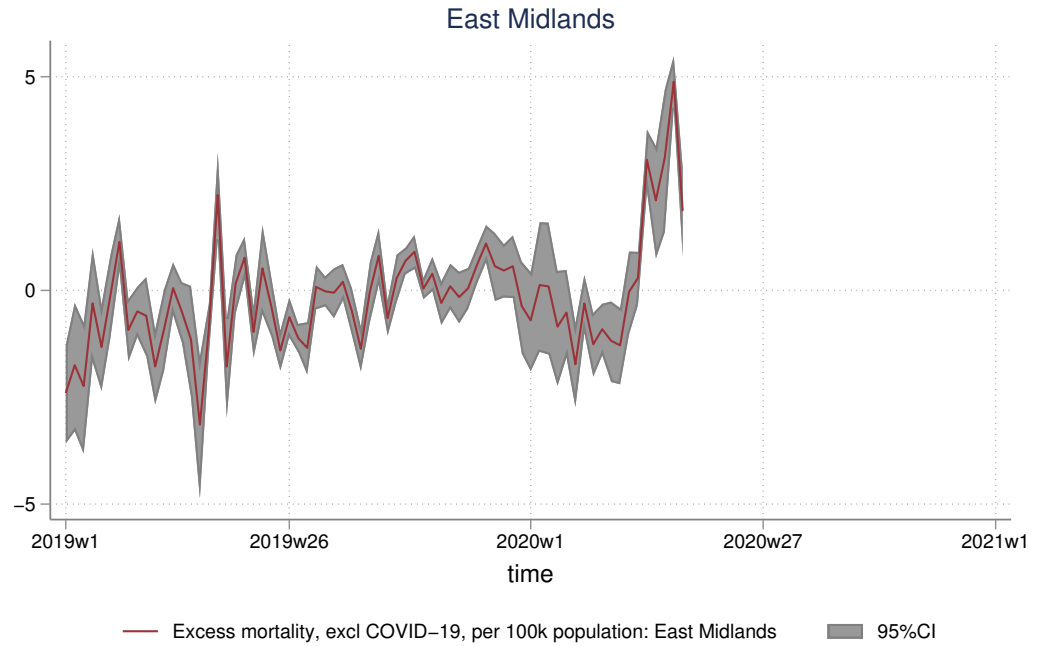

Figure 54: EMD all-cause excess deaths minus COVID19, from 2020 week 1

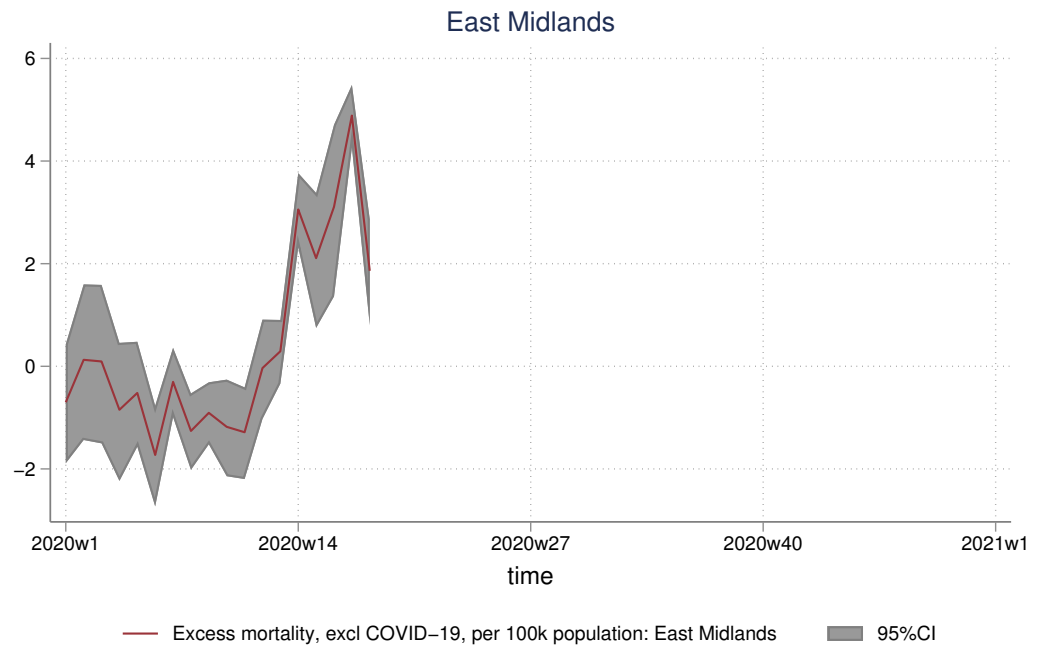

## 2.6 West Midlands

Figure 55: WMD Mortality time trend and model, from 2010 week 1

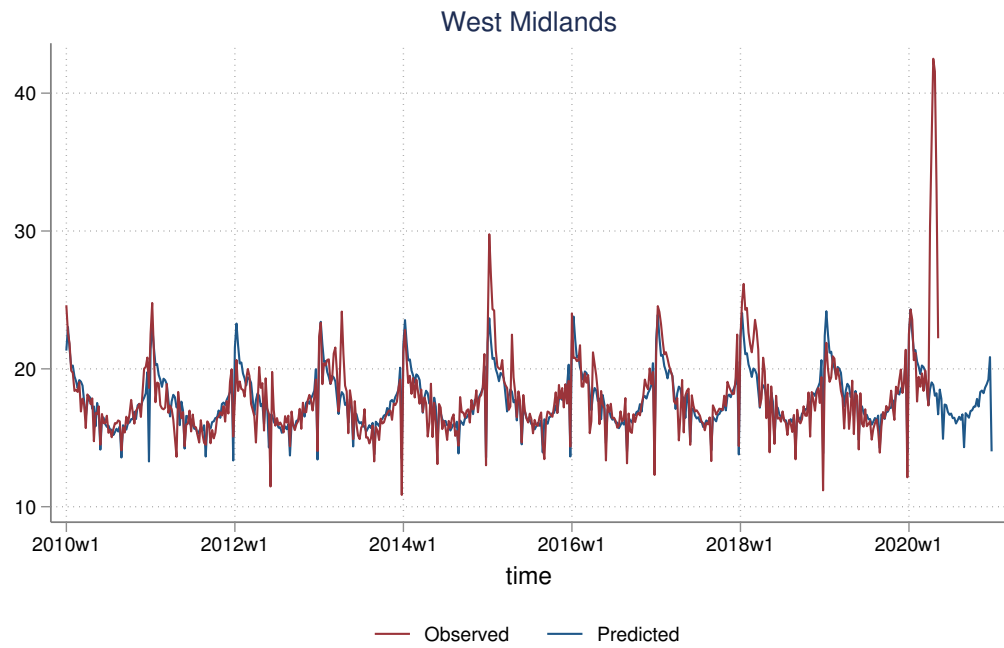

Figure 56: WMD Mortality time trend and model, from 2019 week 1

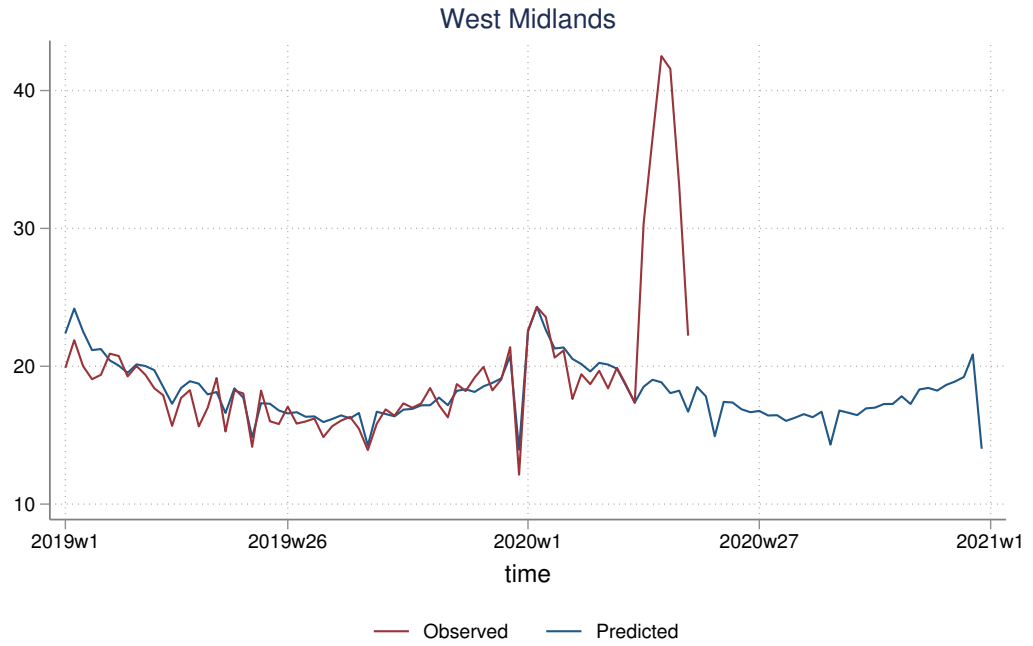

Figure 57: WMD Mortality time trend and model, from 2020 week 1

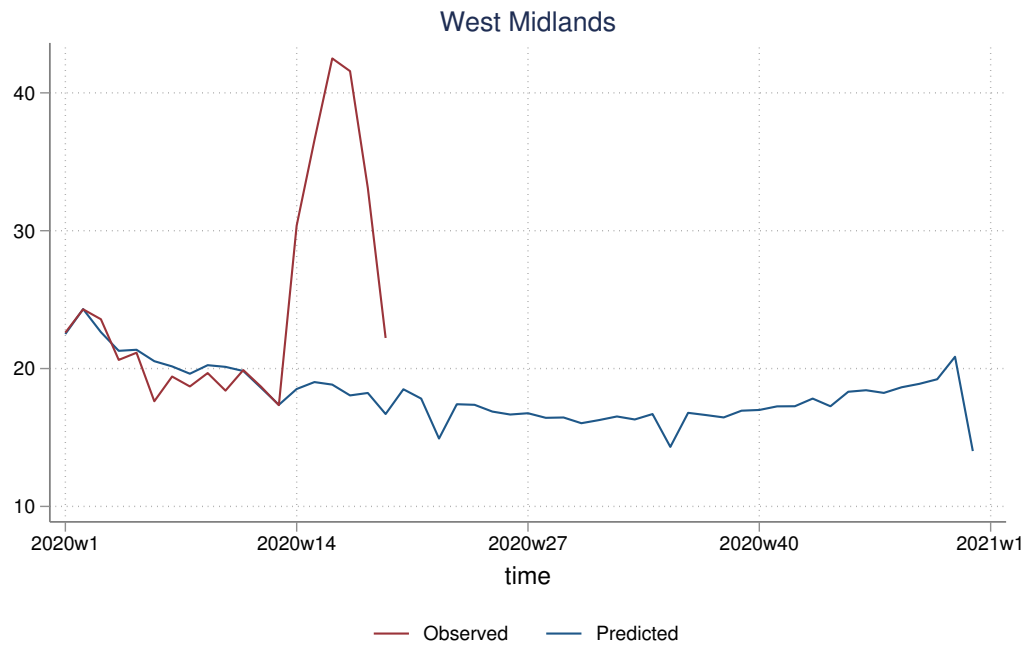



Figure 58: WMD all-cause excess deaths, from 2010 week 1

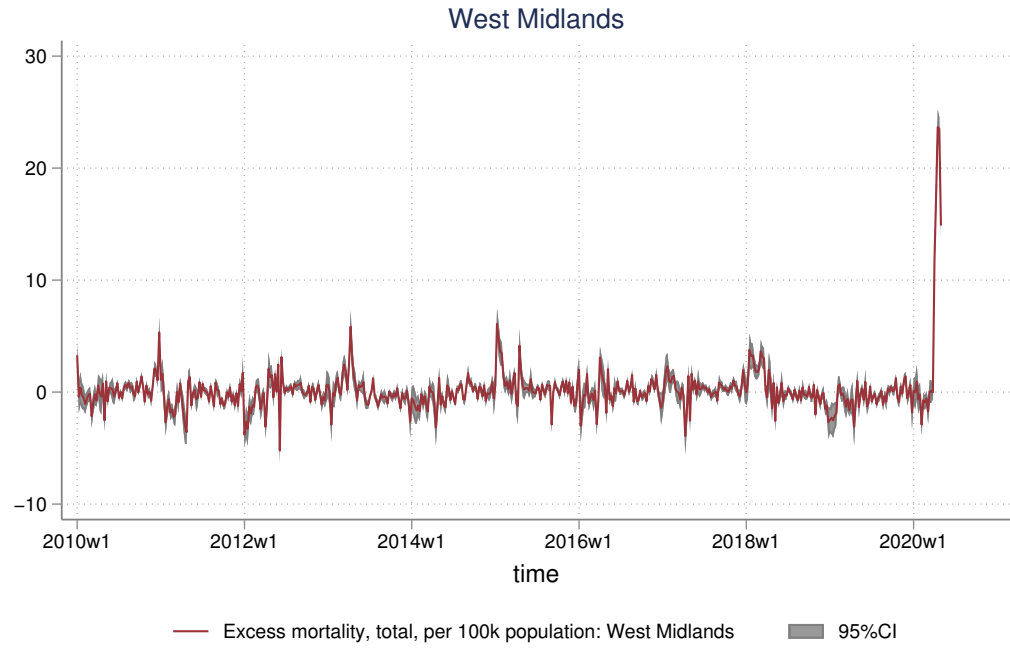

Figure 59: WMD all-cause excess deaths, from 2019 week 1

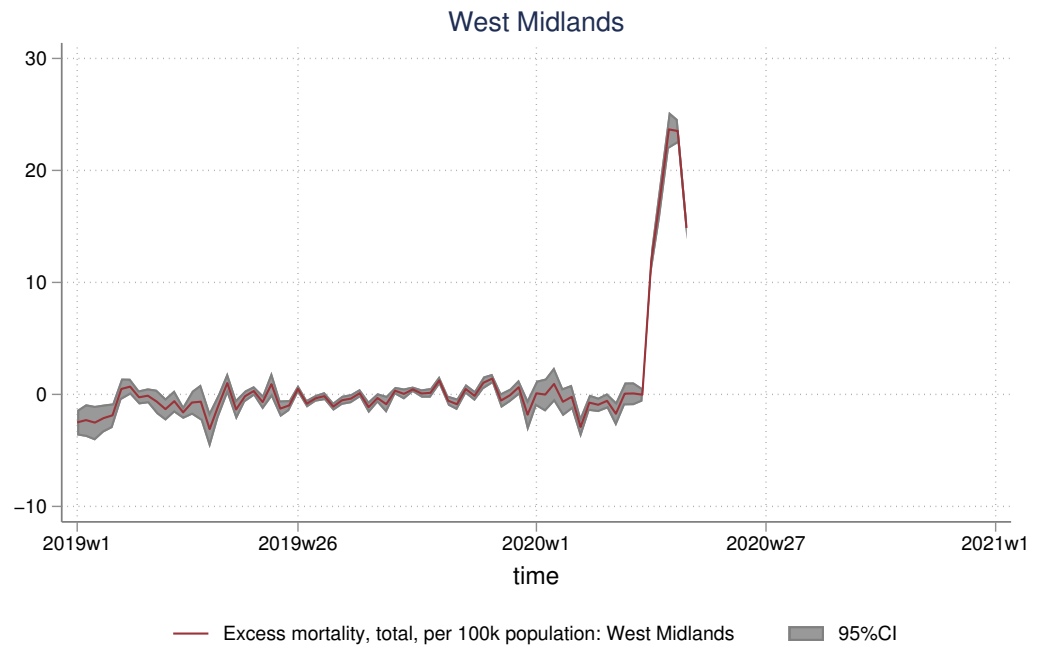



Figure 62: WMD all-cause excess deaths minus COVID19, from 2019 week 1

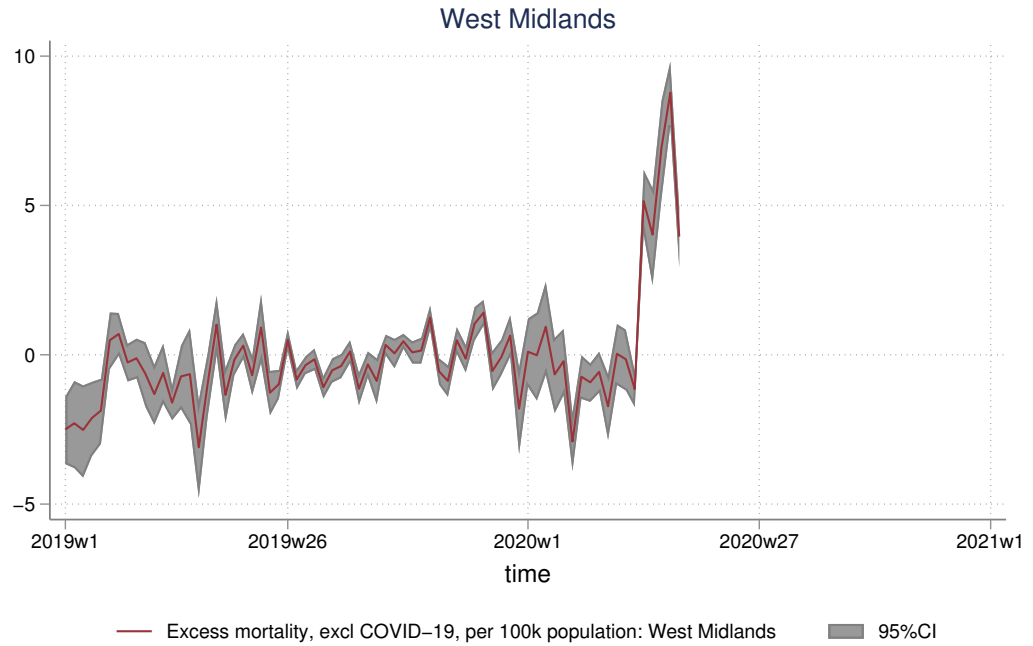

Figure 63: WMD all-cause excess deaths minus COVID19, from 2020 week 1

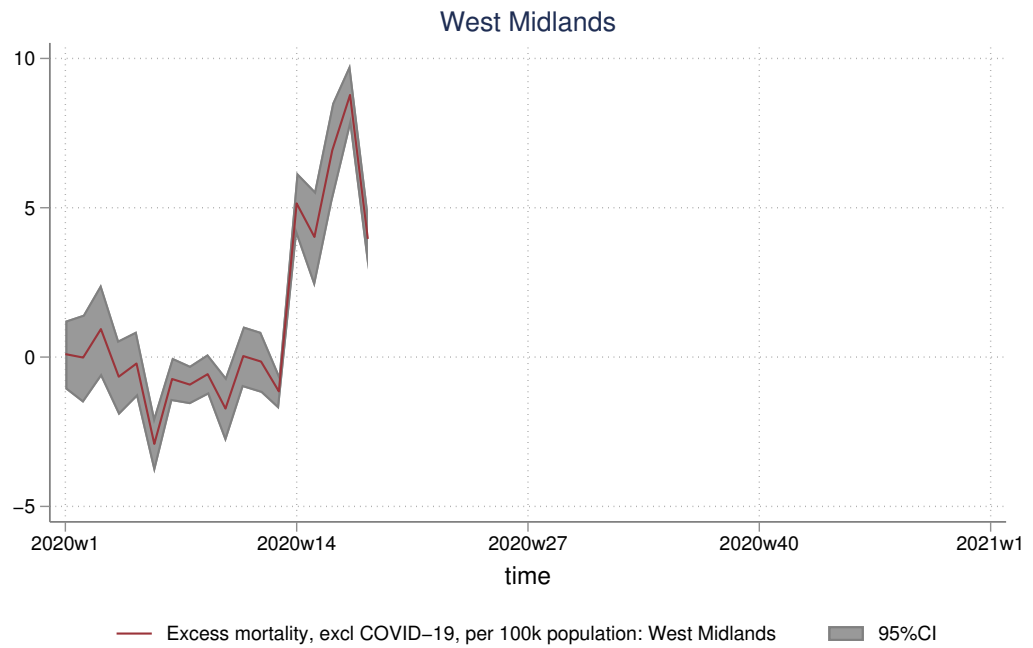

## 2.7 East

Figure 64: East Mortality time trend and model, from 2010 week 1

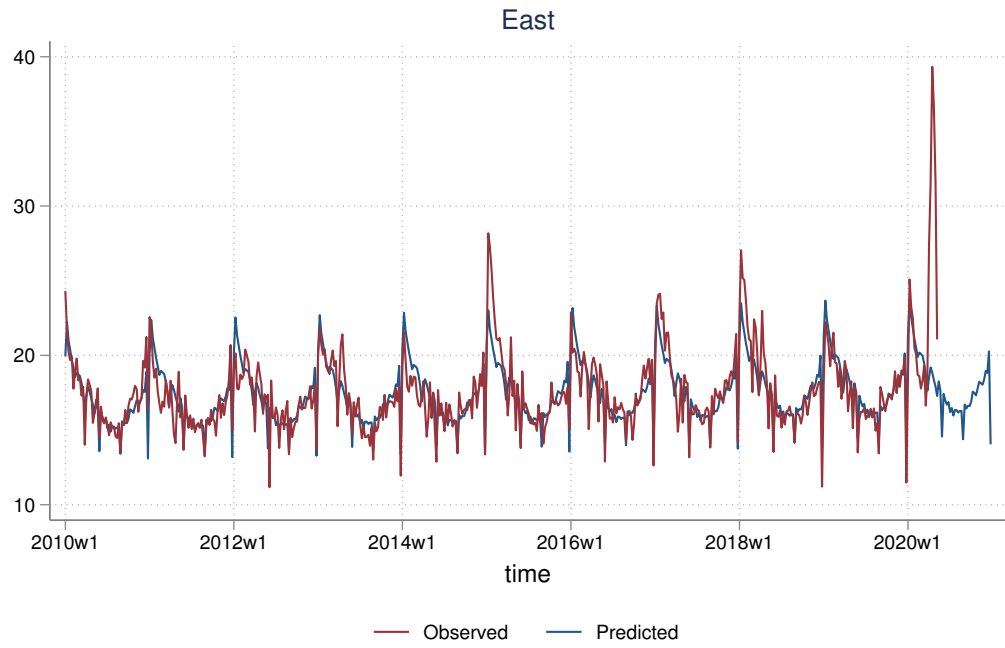

Figure 65: East Mortality time trend and model, from 2019 week 1

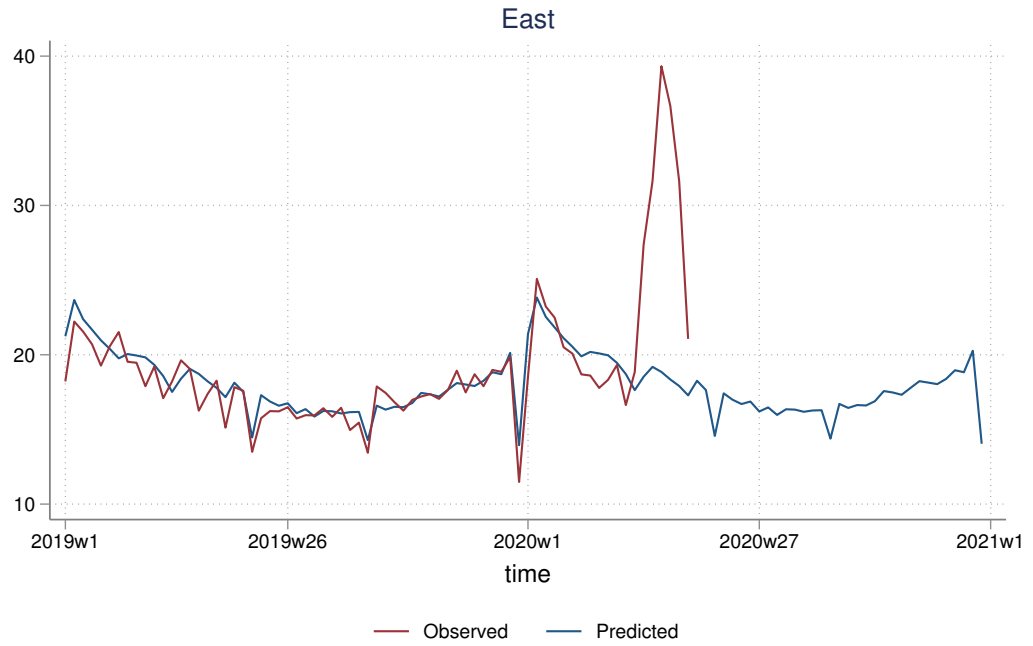

Figure 66: East Mortality time trend and model, from 2020 week 1

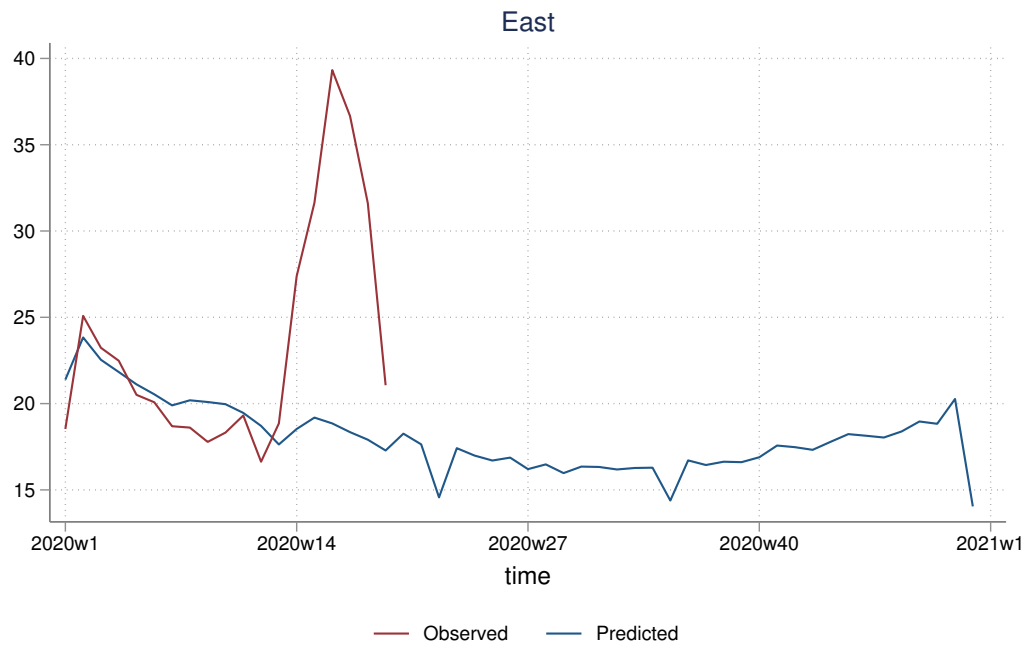

Figure 67: East all-cause excess deaths, from 2010 week 1

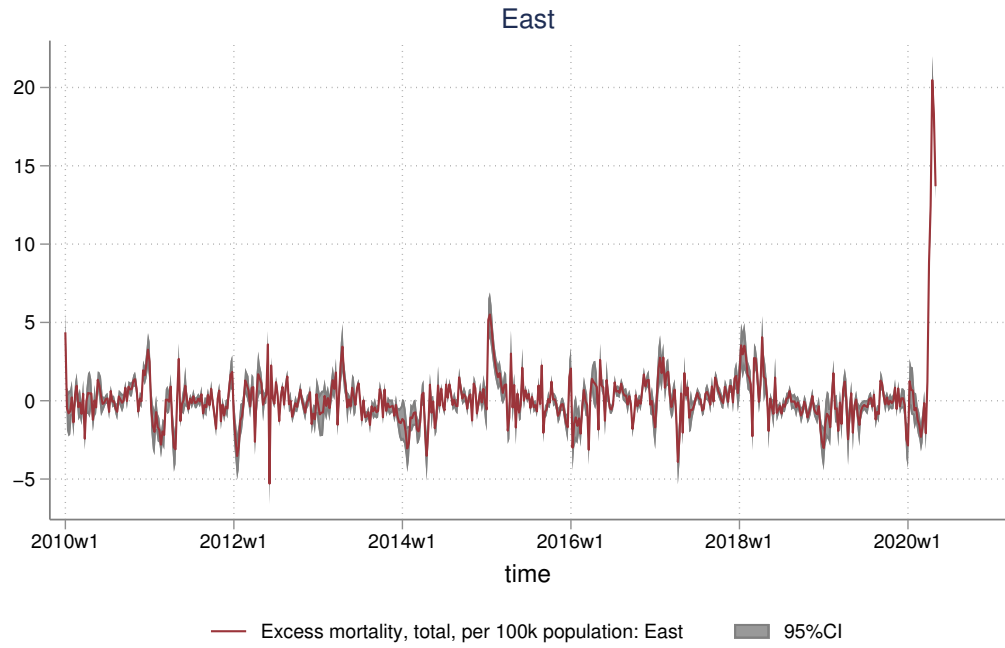

Figure 68: East all-cause excess deaths, from 2019 week 1

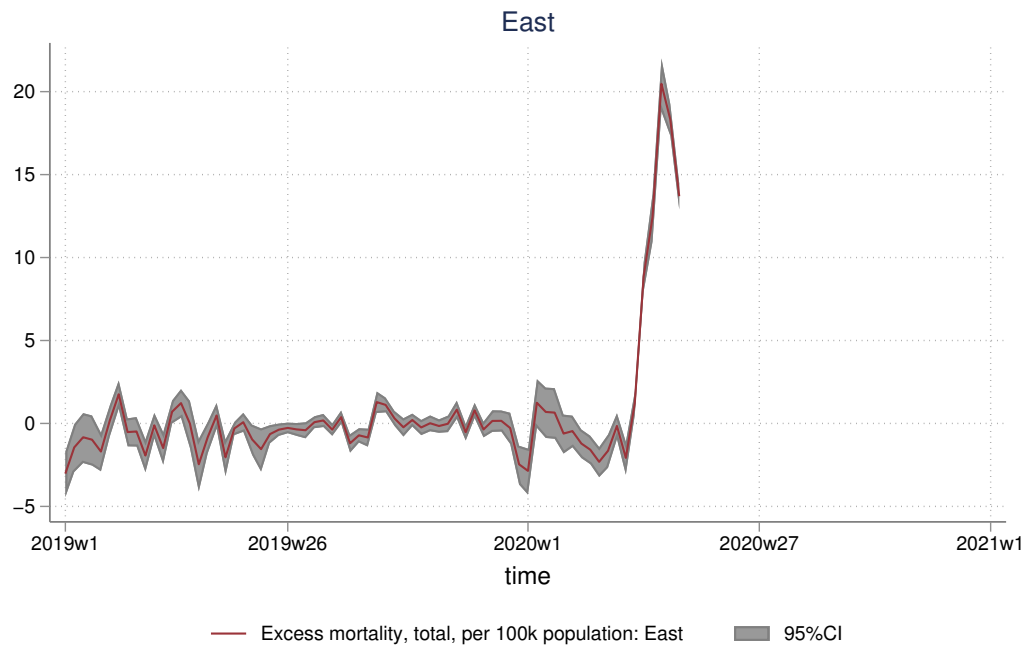

Figure 69: East all-cause excess deaths, from 2020 week 1

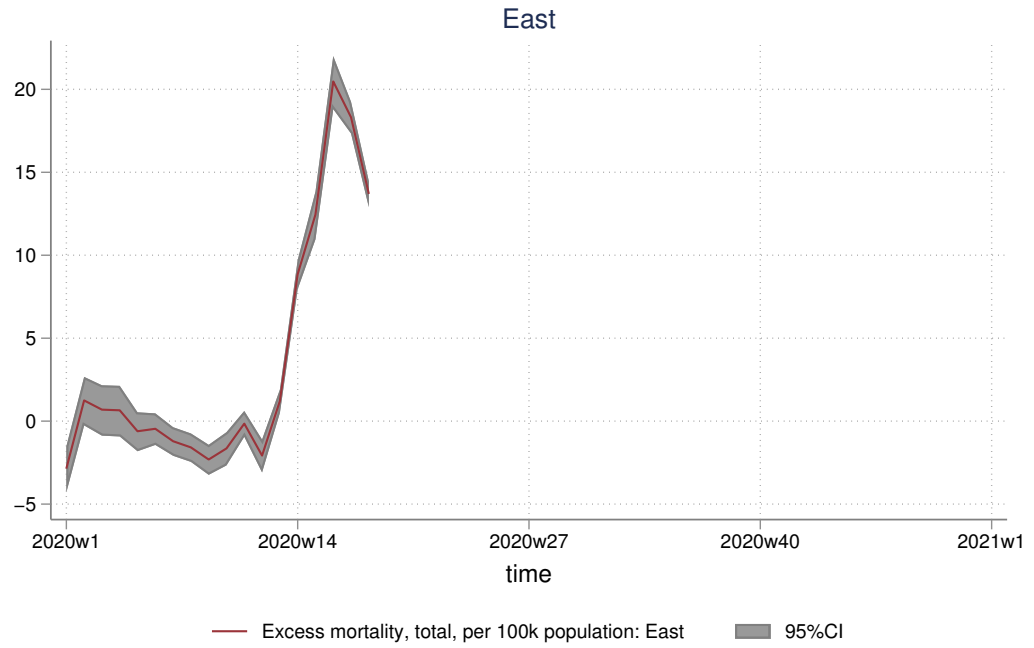

Figure 70: East all-cause excess deaths minus COVID19, from 2010 week 1

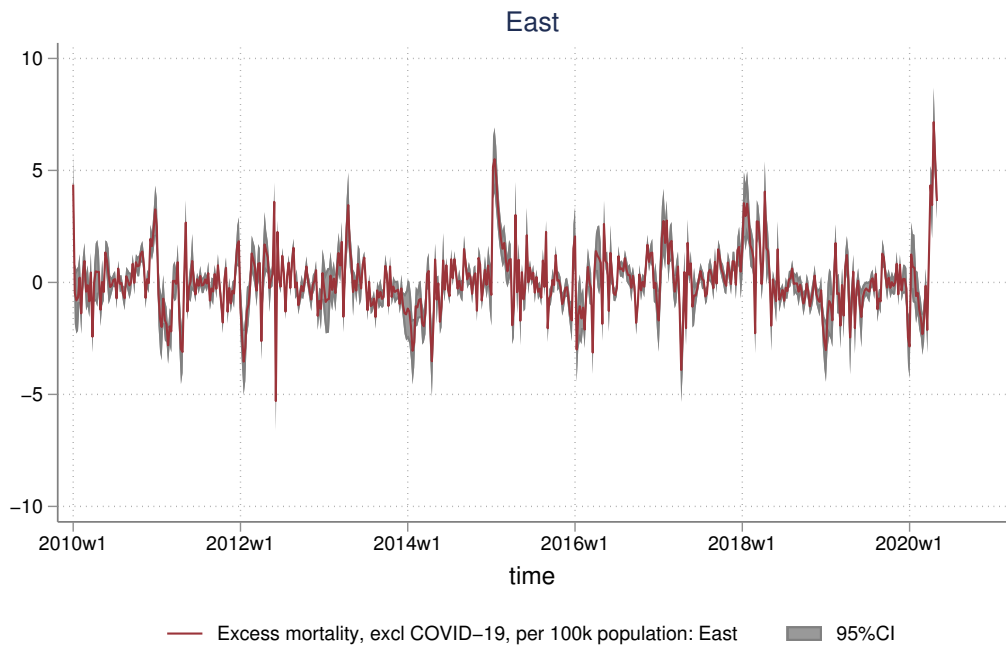

Figure 71: East all-cause excess deaths minus COVID19, from 2019 week 1

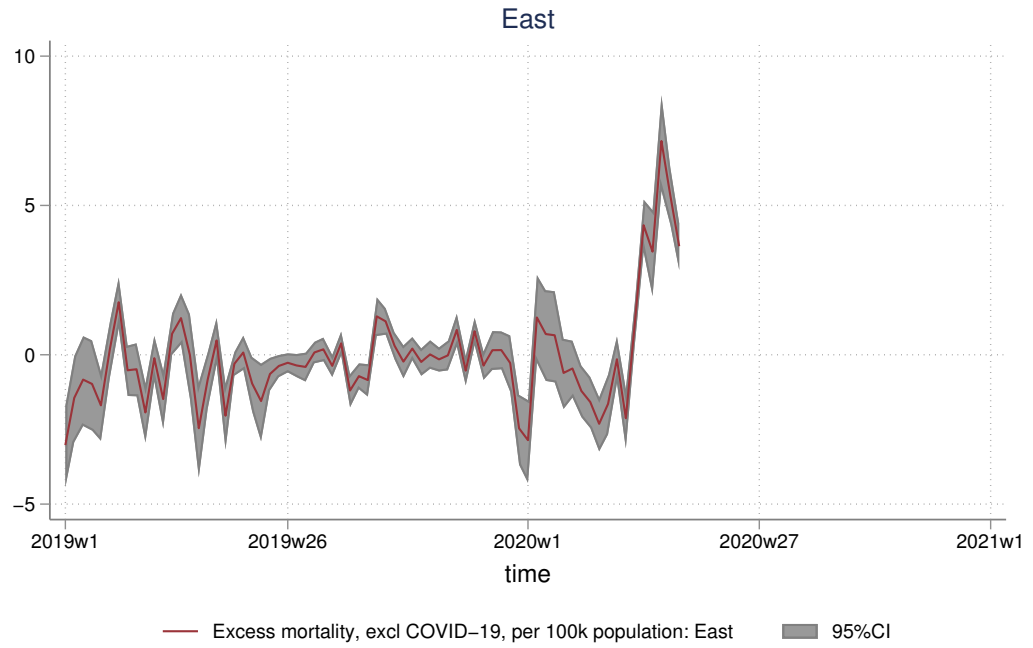

Figure 72: East all-cause excess deaths minus COVID19, from 2020 week 1

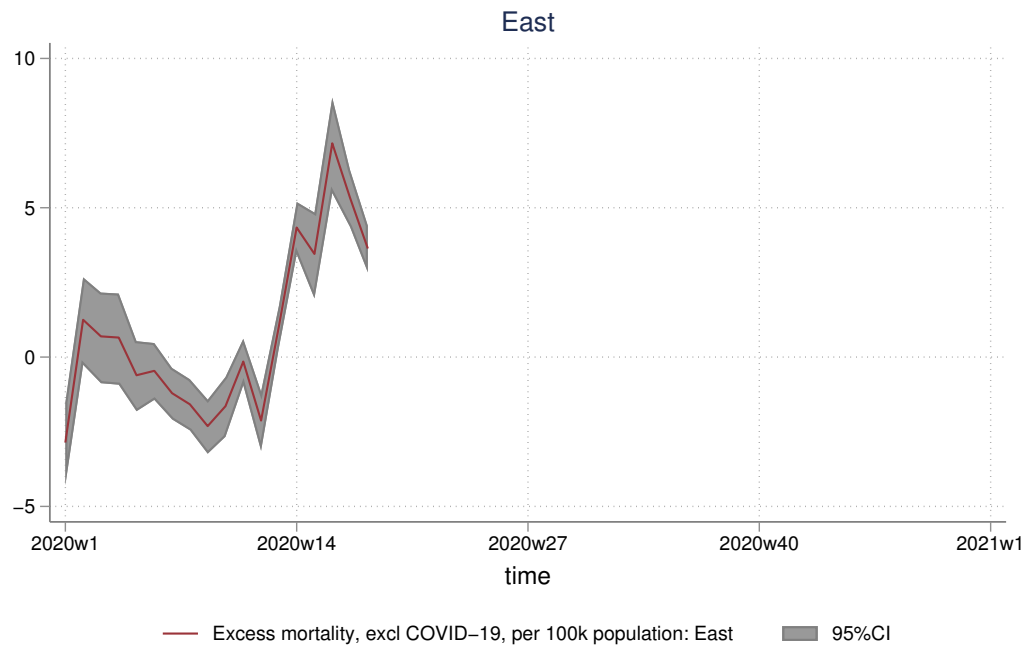



## 2.8 London

Figure 73: London Mortality time trend and model, from 2010 week 1

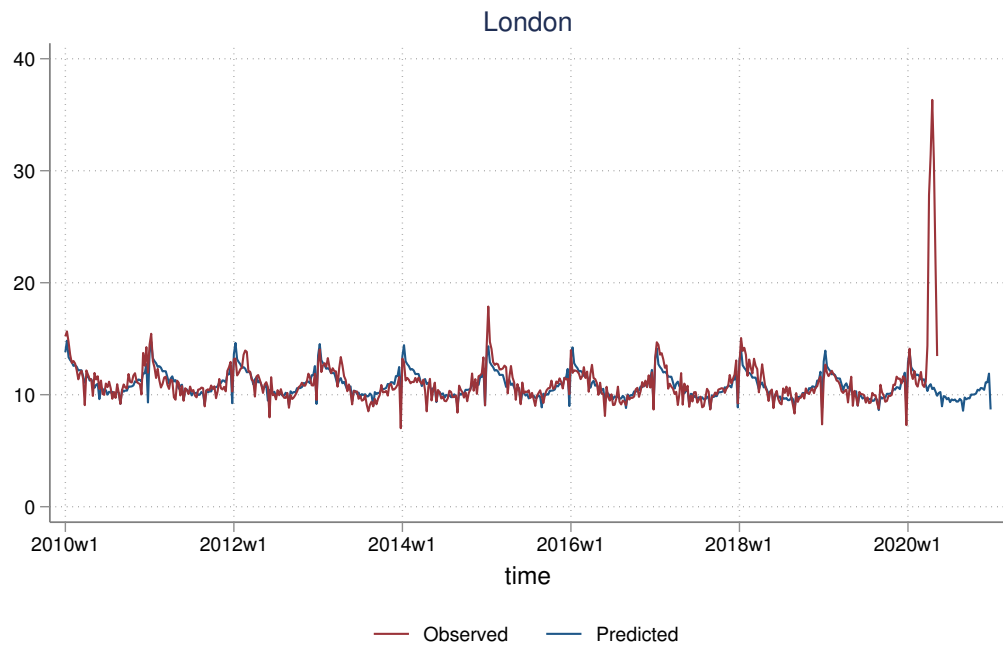

Figure 74: London Mortality time trend and model, from 2019 week 1

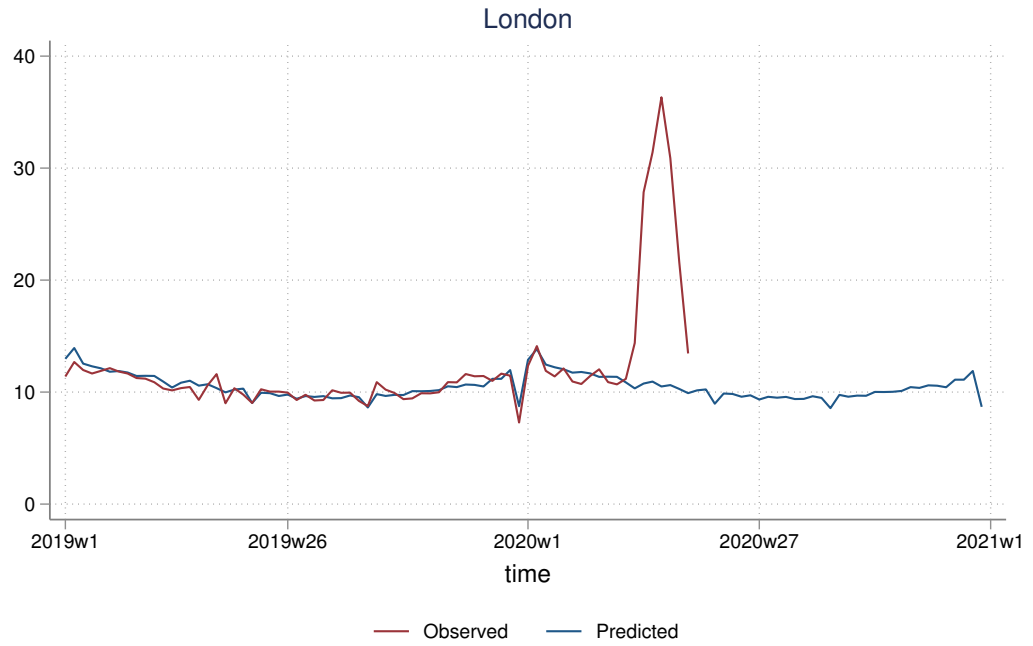

Figure 75: London Mortality time trend and model, from 2020 week 1

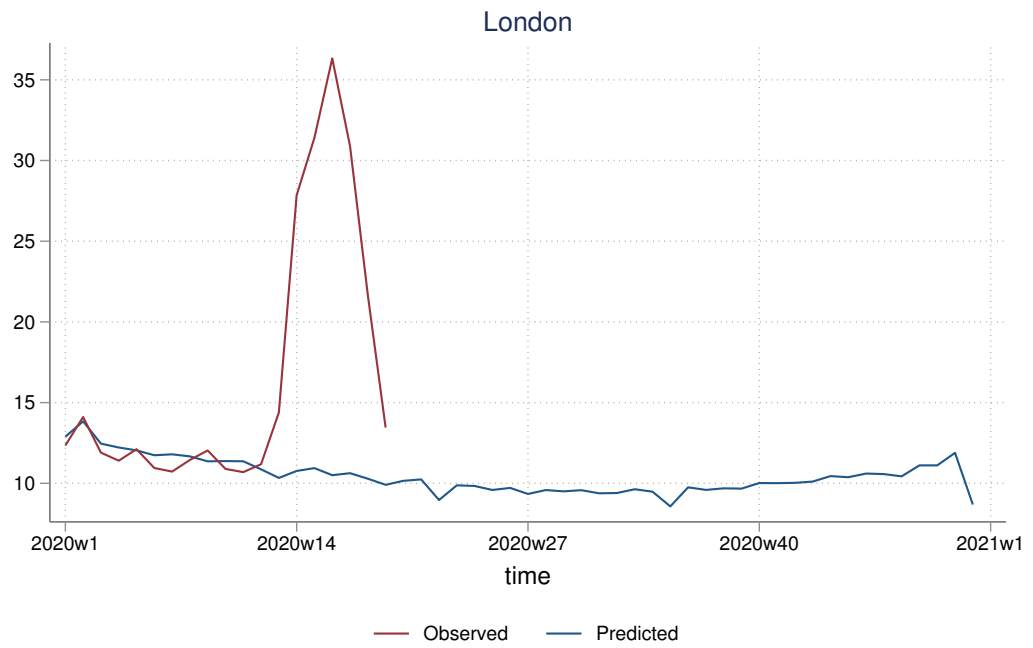

Figure 76: London all-cause excess deaths, from 2010 week 1

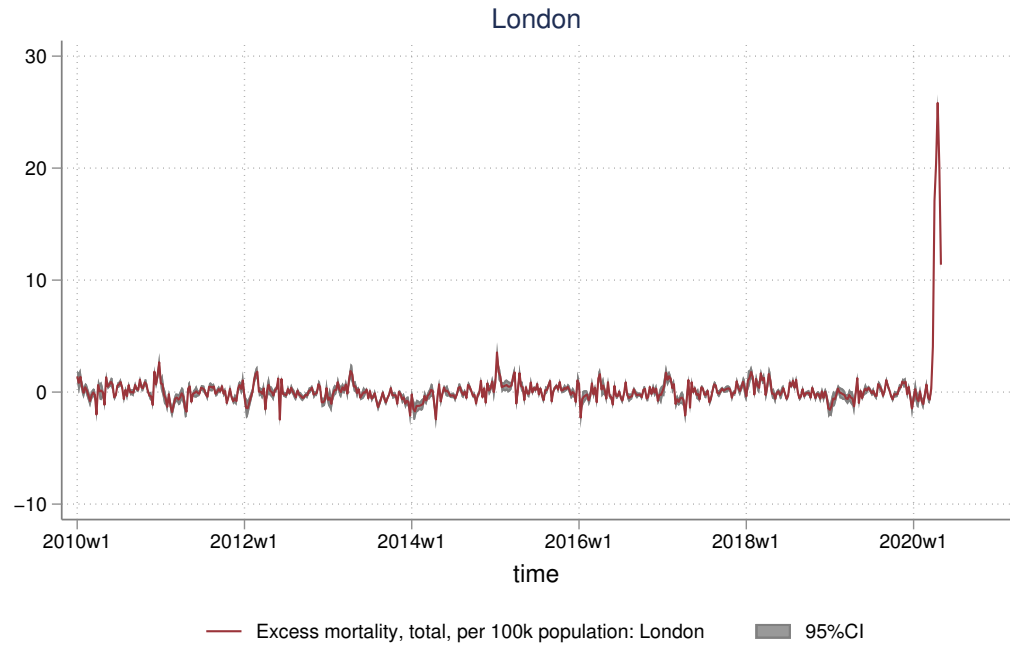

Figure 77: London all-cause excess deaths, from 2019 week 1

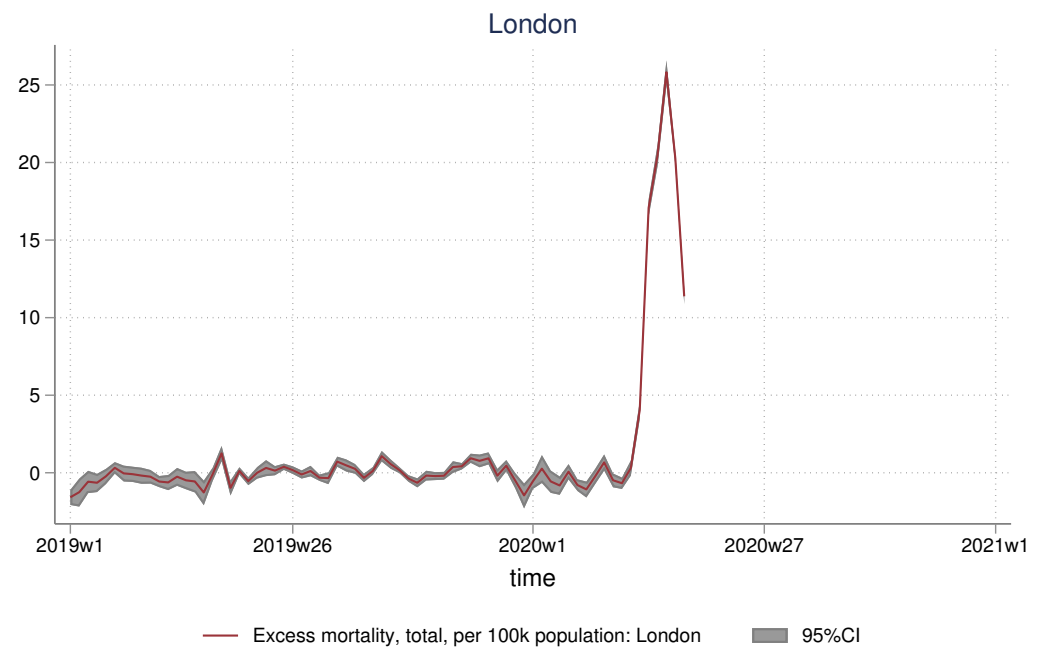

Figure 78: London all-cause excess deaths, from 2020 week 1

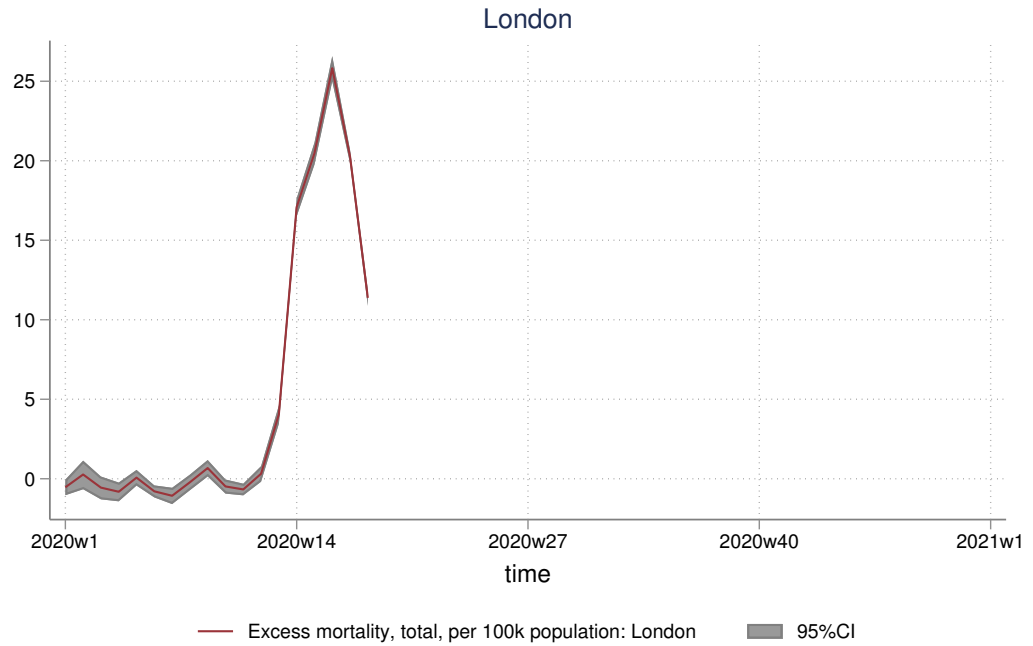

Figure 79: London all-cause excess deaths minus COVID19, from 2010 week 1

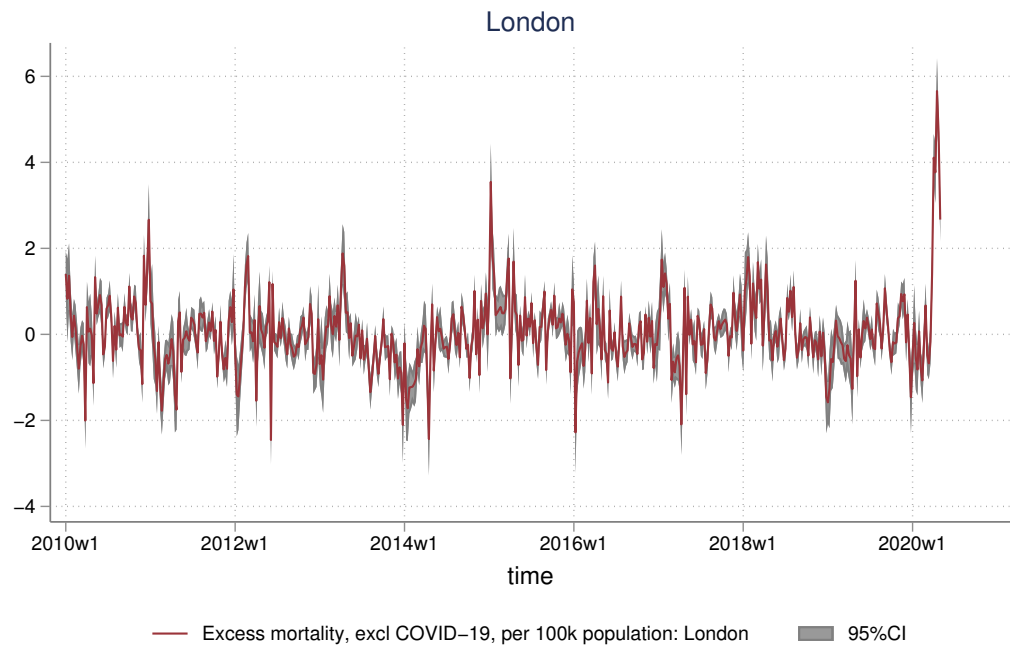

Figure 80: London all-cause excess deaths minus COVID19, from 2019 week 1

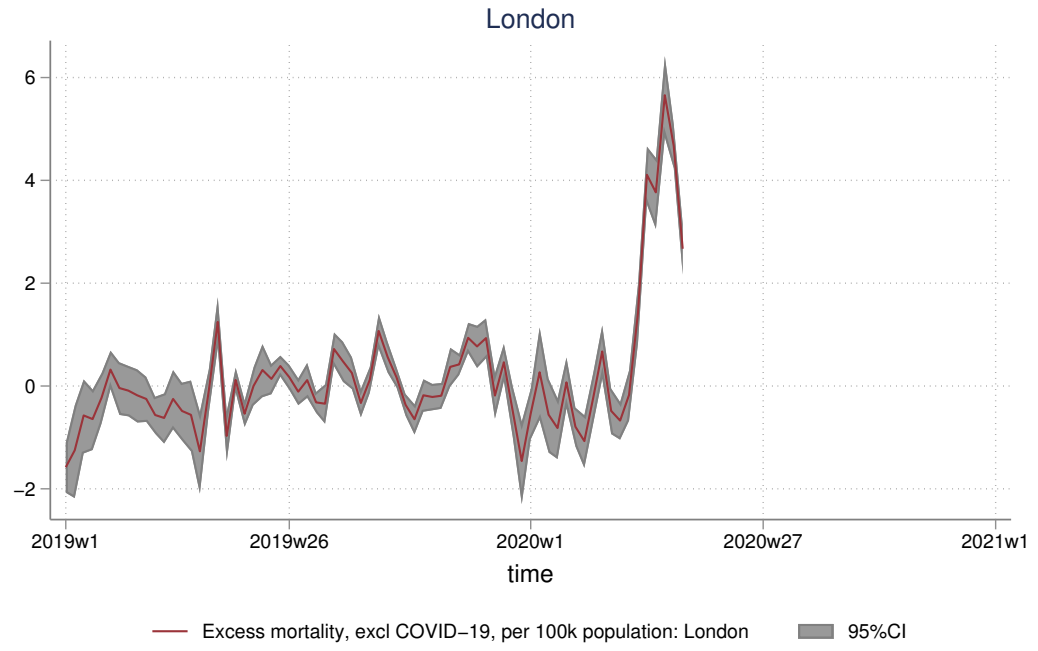

Figure 81: London all-cause excess deaths minus COVID19, from 2020 week 1

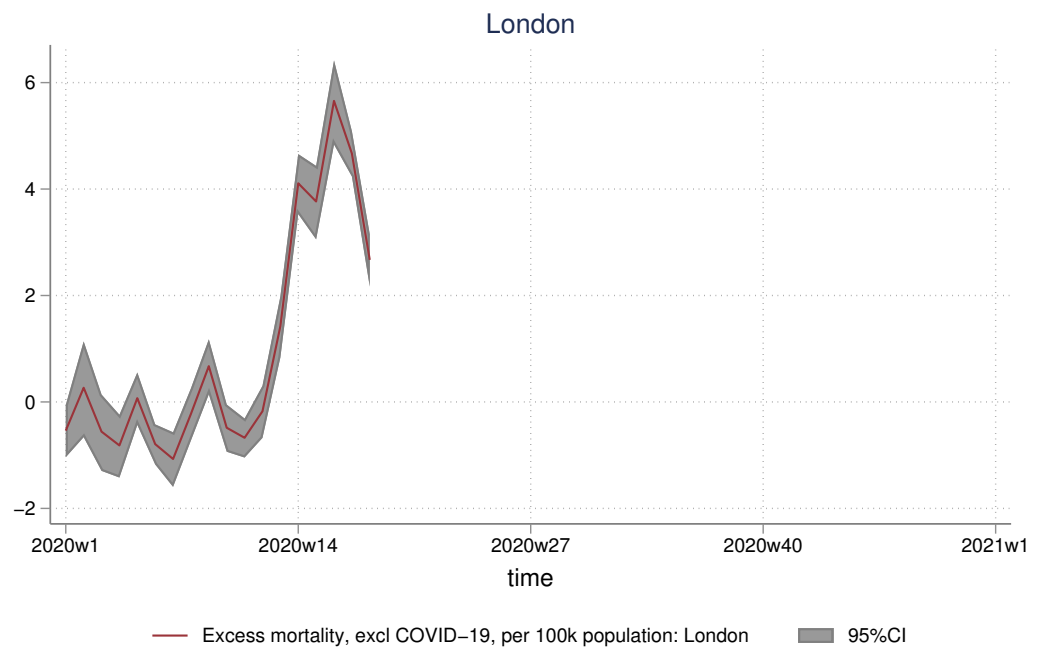

## 2.9 South East

Figure 82: SE Mortality time trend and model, from 2010 week 1

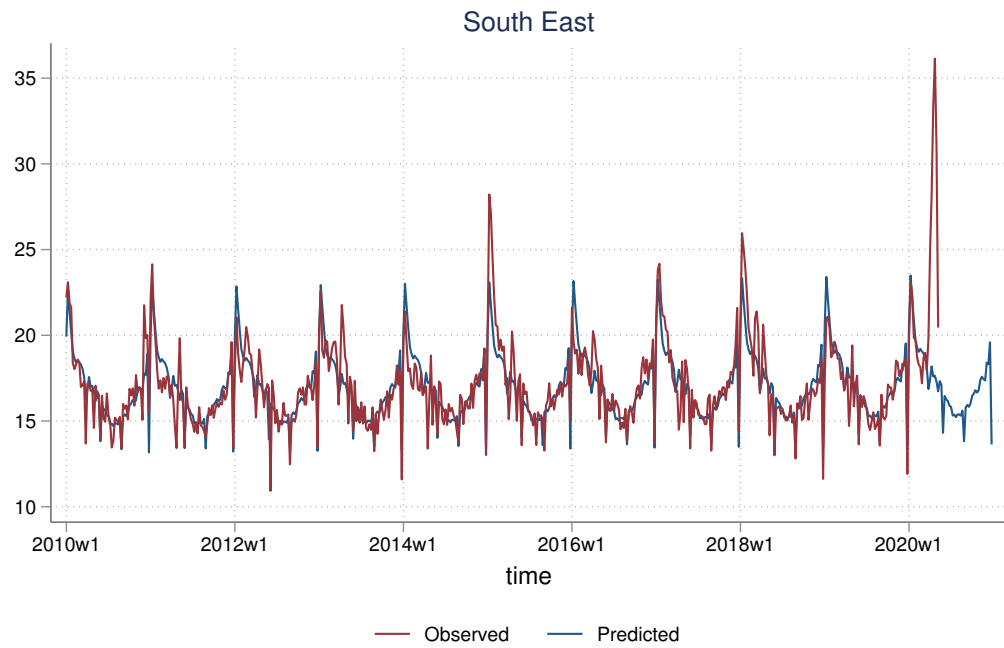

Figure 83: SE Mortality time trend and model, from 2019 week 1

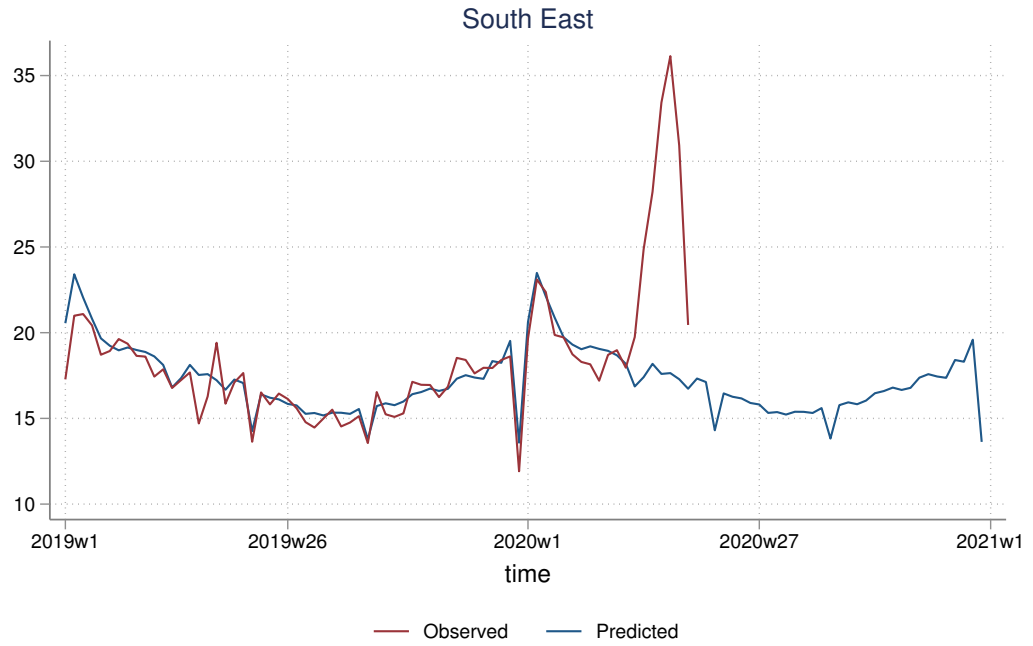

Figure 84: SE Mortality time trend and model, from 2020 week 1

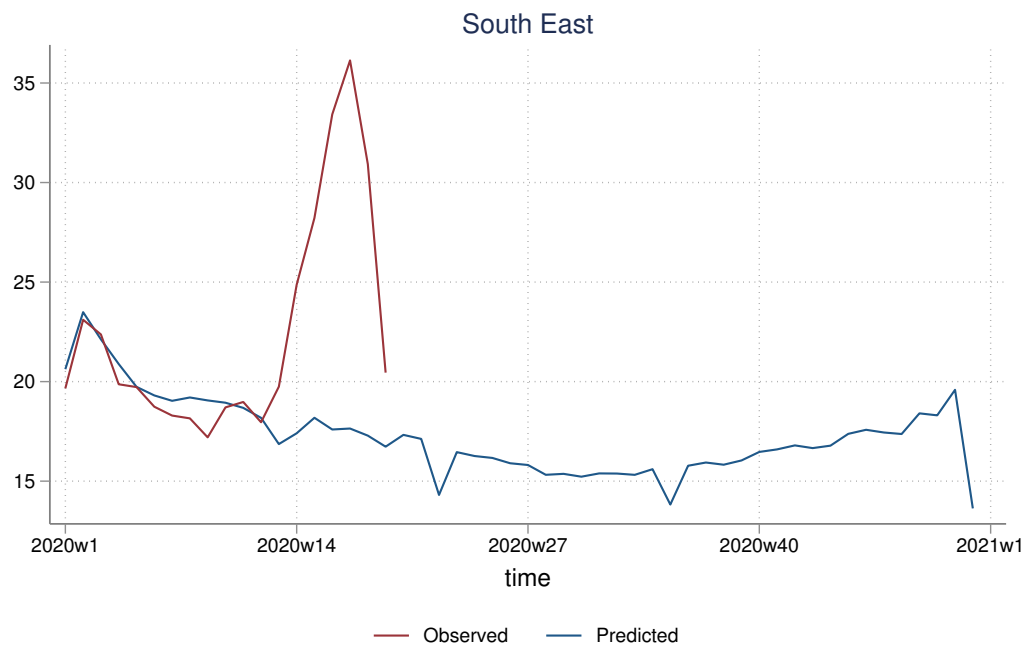

Figure 85: SE all-cause excess deaths, from 2010 week 1

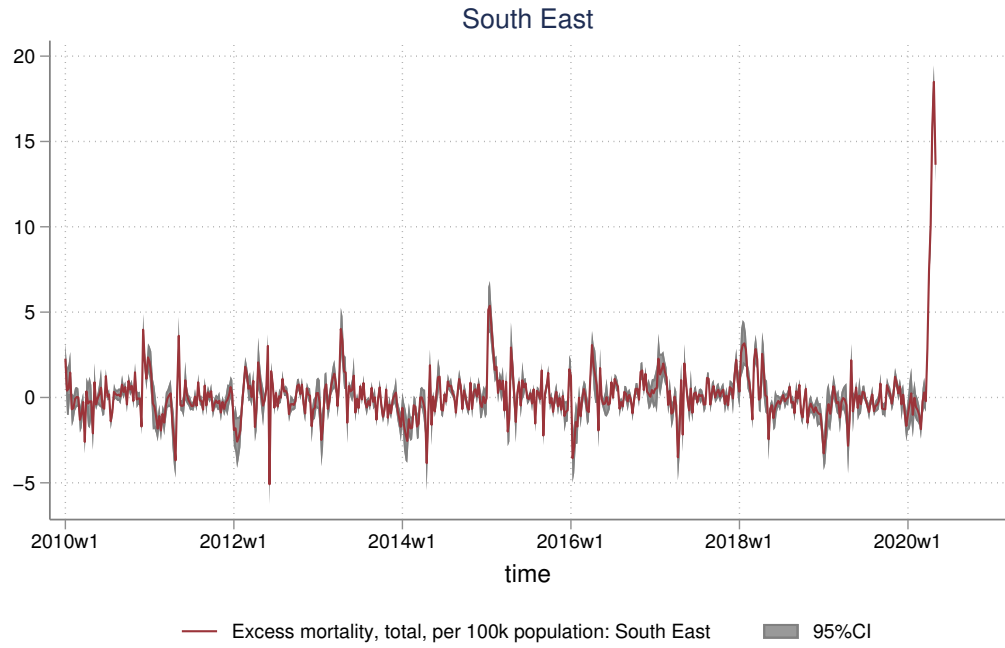

Figure 86: SE all-cause excess deaths, from 2019 week 1

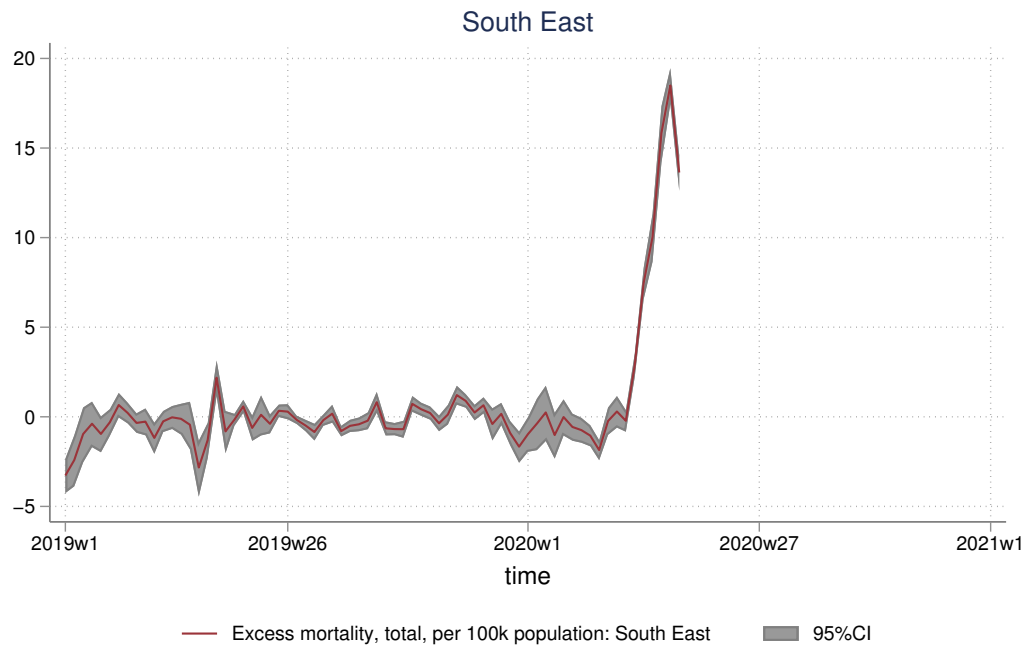



Figure 87: SE all-cause excess deaths, from 2020 week 1

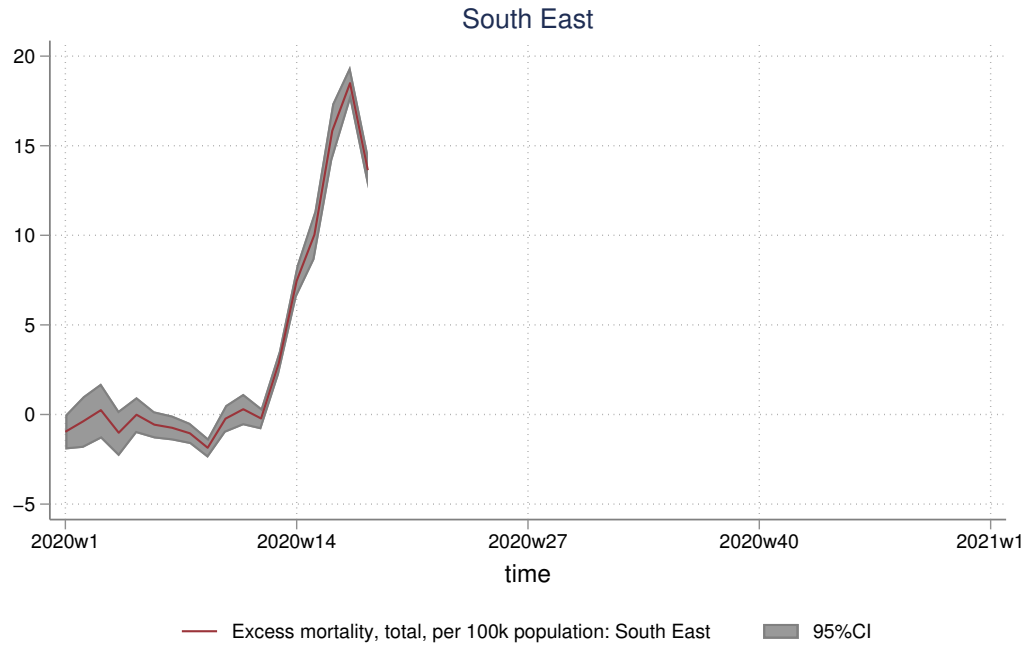

Figure 88: SE all-cause excess deaths minus COVID19, from 2010 week 1

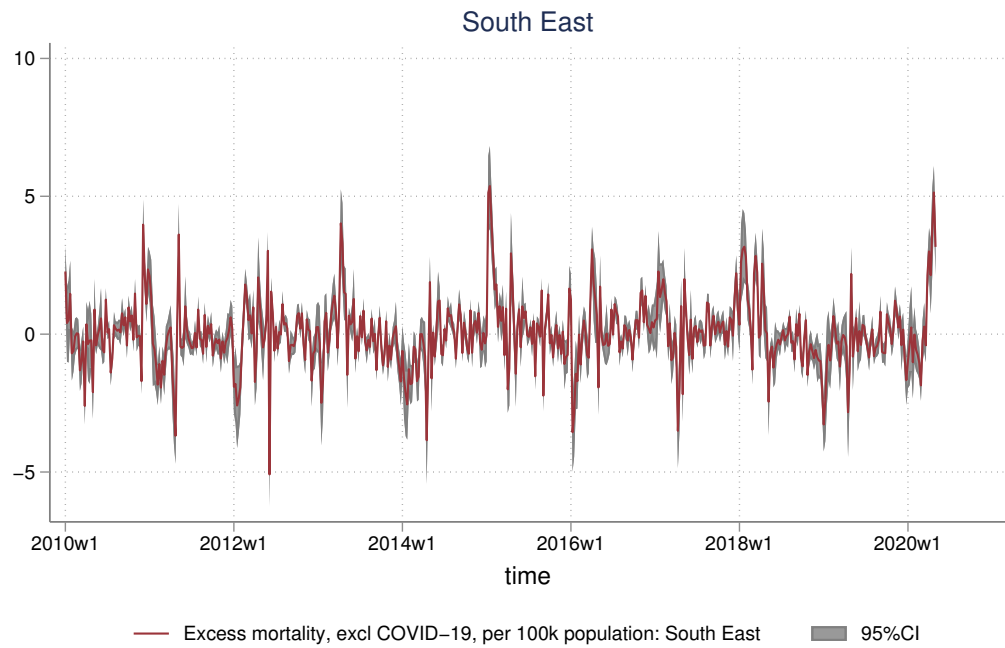

Figure 89: SE all-cause excess deaths minus COVID19, from 2019 week 1

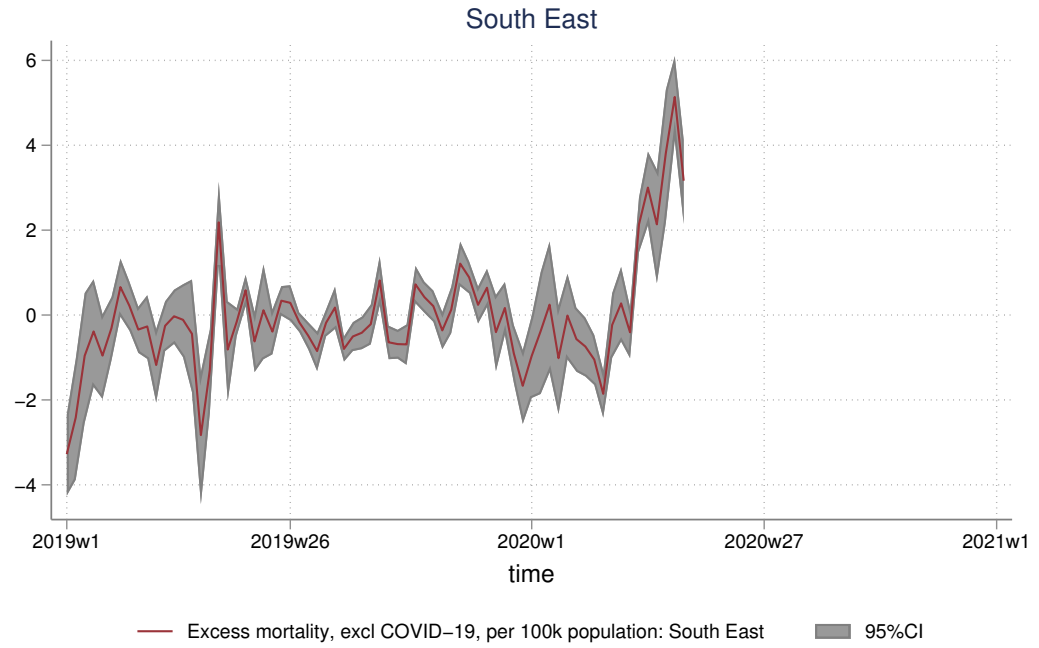

Figure 90: SE all-cause excess deaths minus COVID19, from 2020 week 1

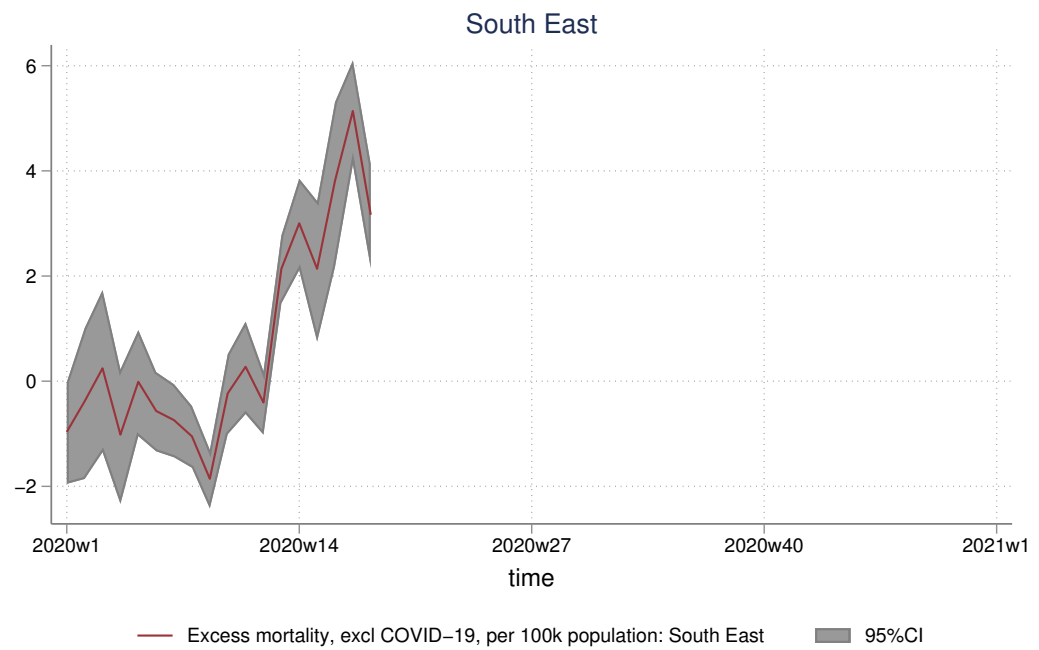

## 2.10 South West

Figure 91: SW Mortality time trend and model, from 2010 week 1

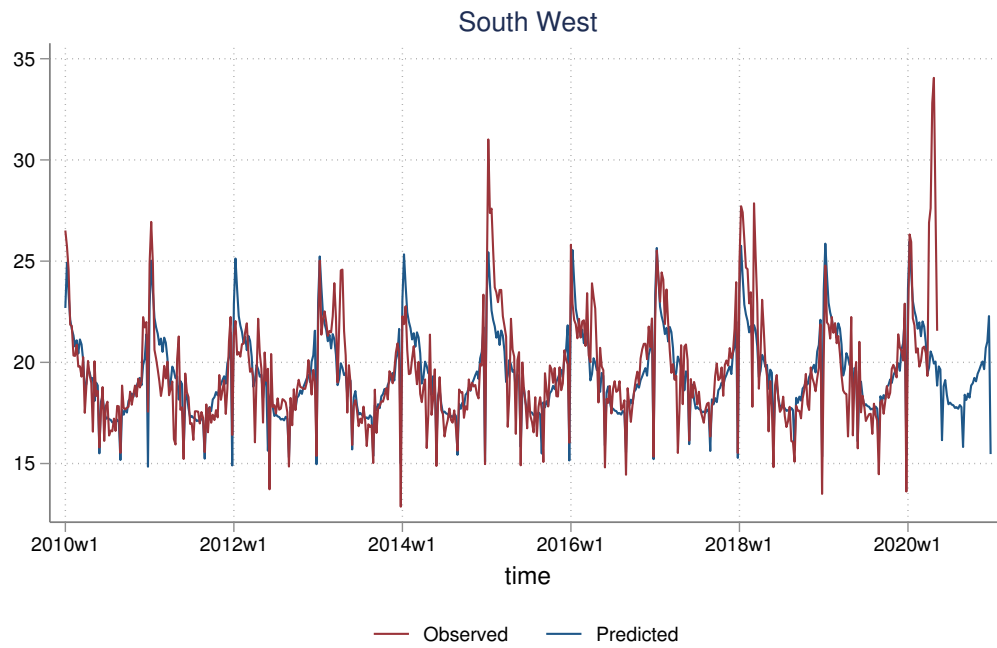

Figure 92: SE Mortality time trend and model, from 2019 week 1

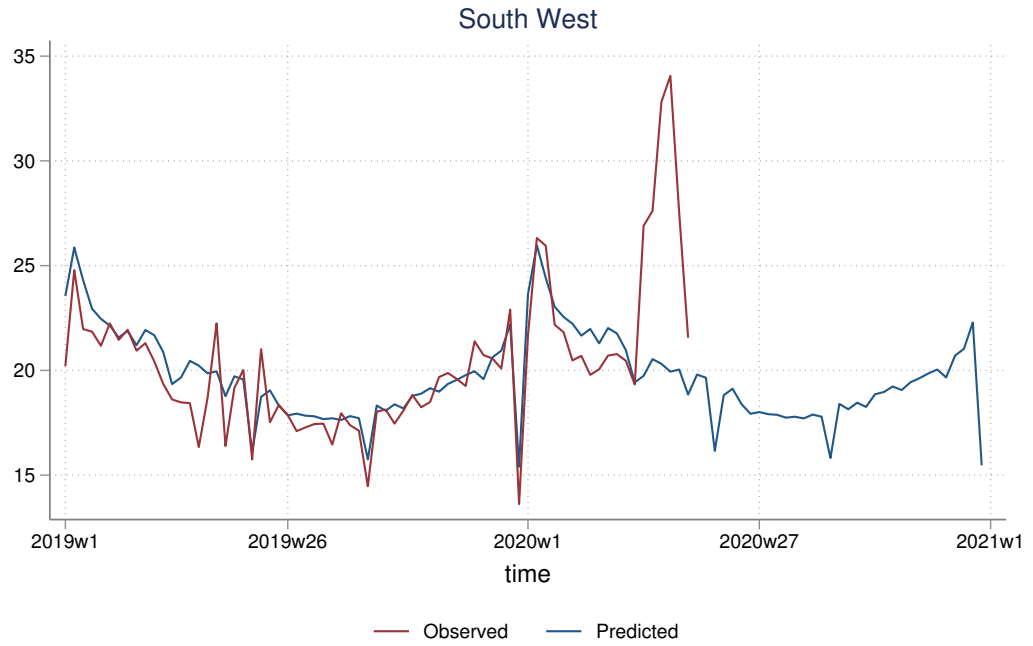

Figure 93: SW Mortality time trend and model, from 2020 week 1

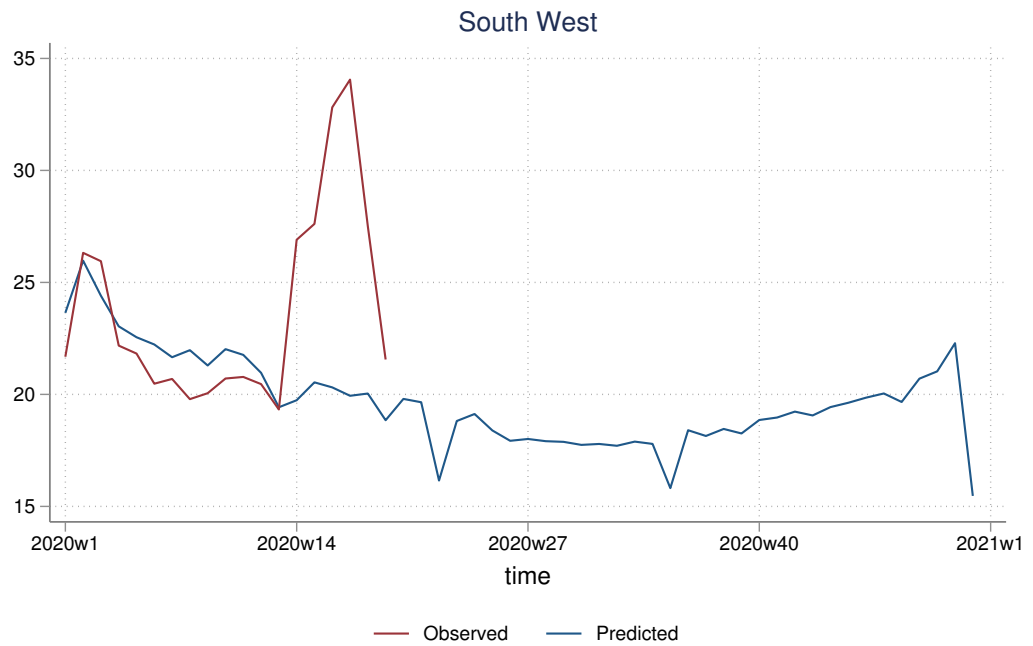

Figure 94: SW all-cause excess deaths, from 2010 week 1

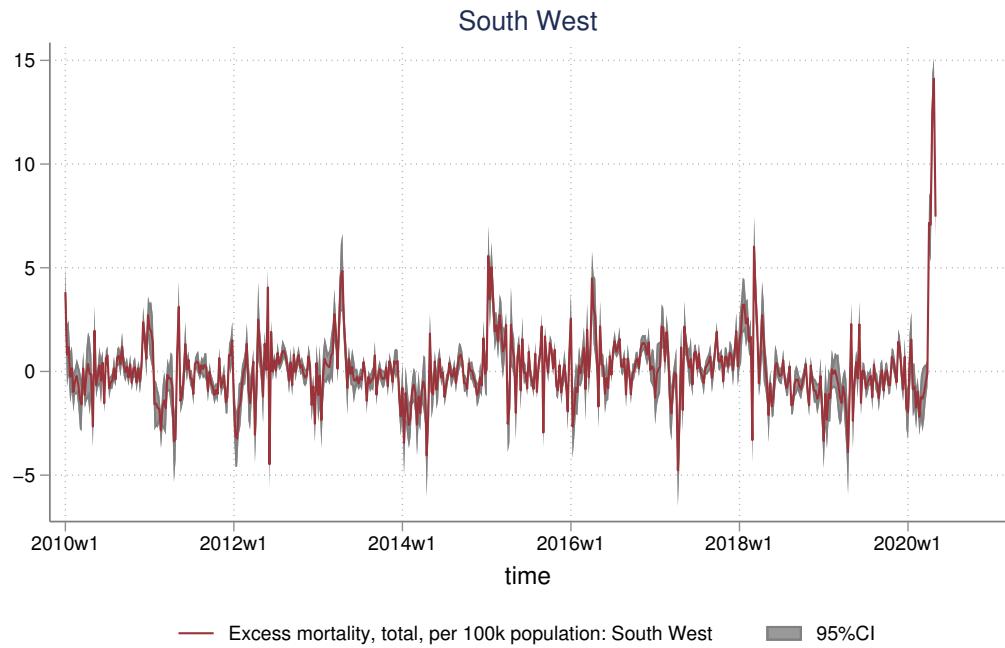

Figure 95: SW all-cause excess deaths, from 2019 week 1

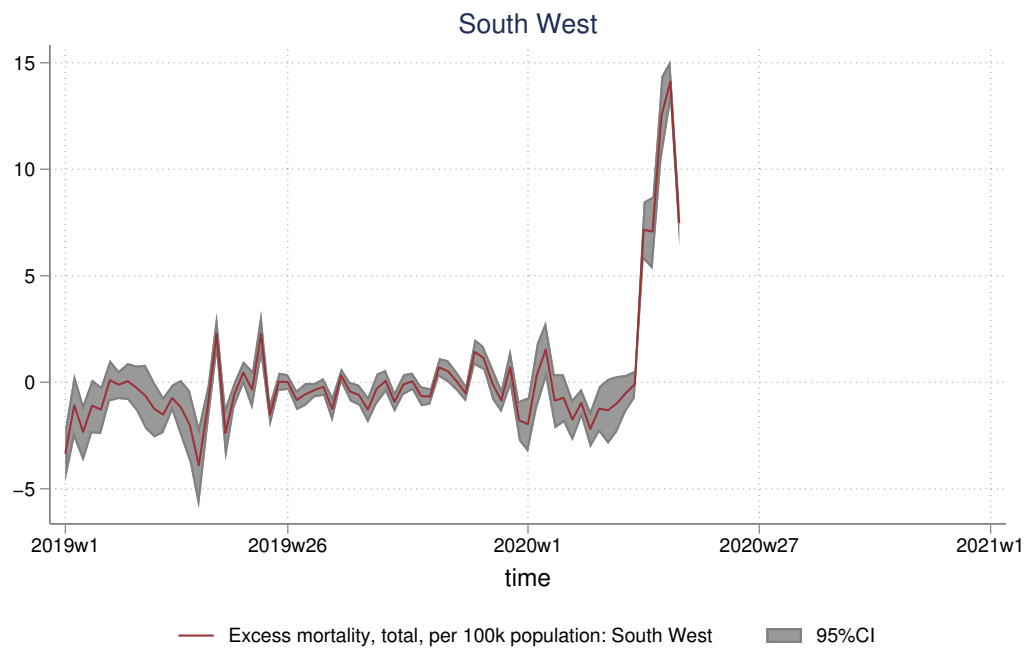

Figure 96: SW all-cause excess deaths, from 2020 week 1

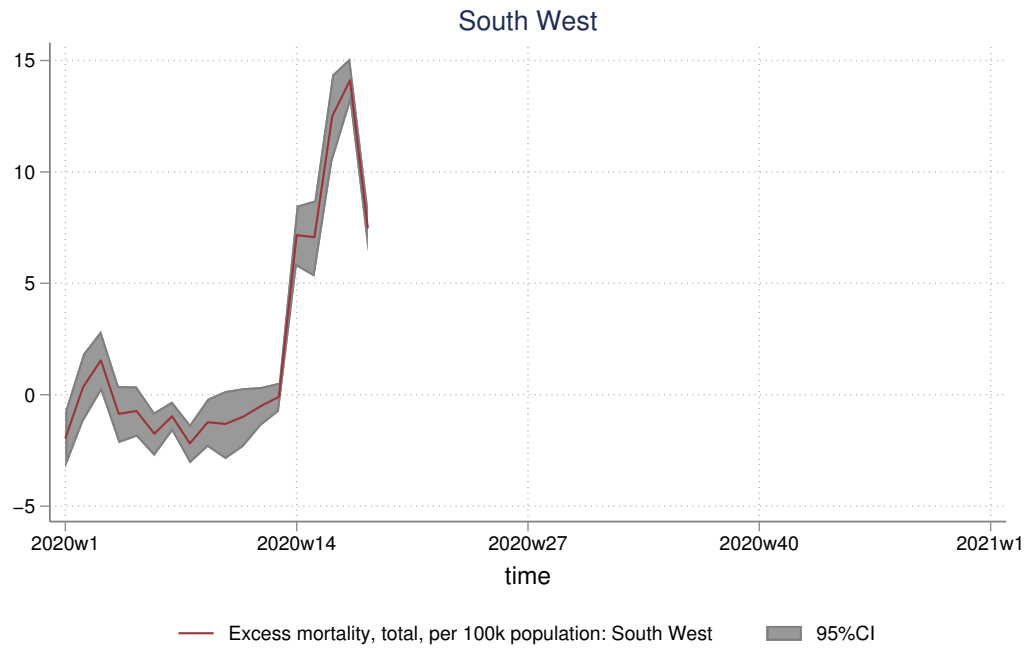

Figure 97: SW all-cause excess deaths minus COVID19, from 2010 week 1

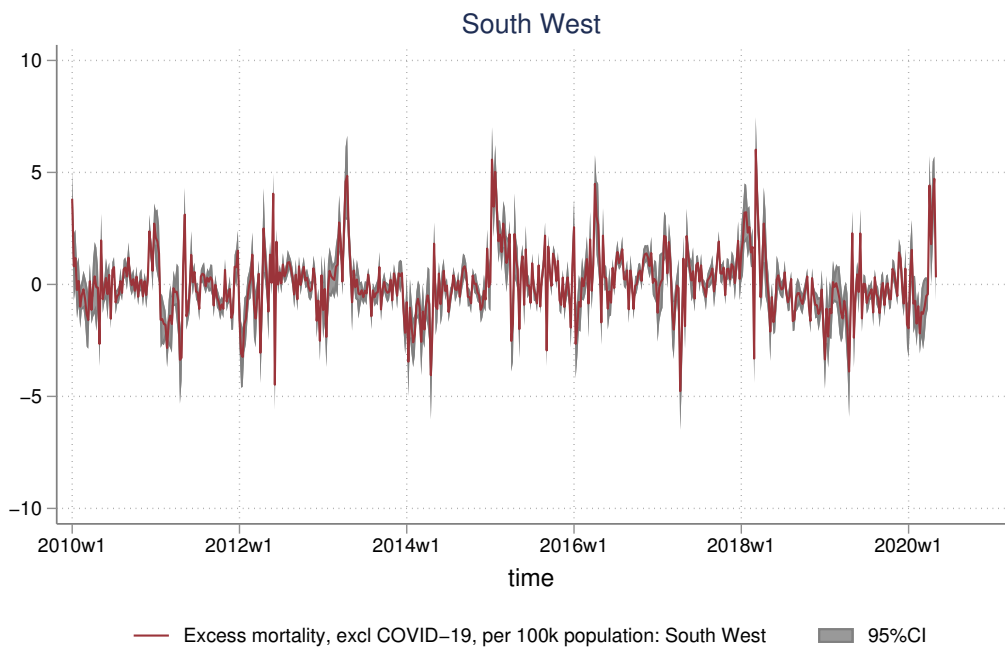

Figure 98: SW all-cause excess deaths minus COVID19, from 2019 week 1

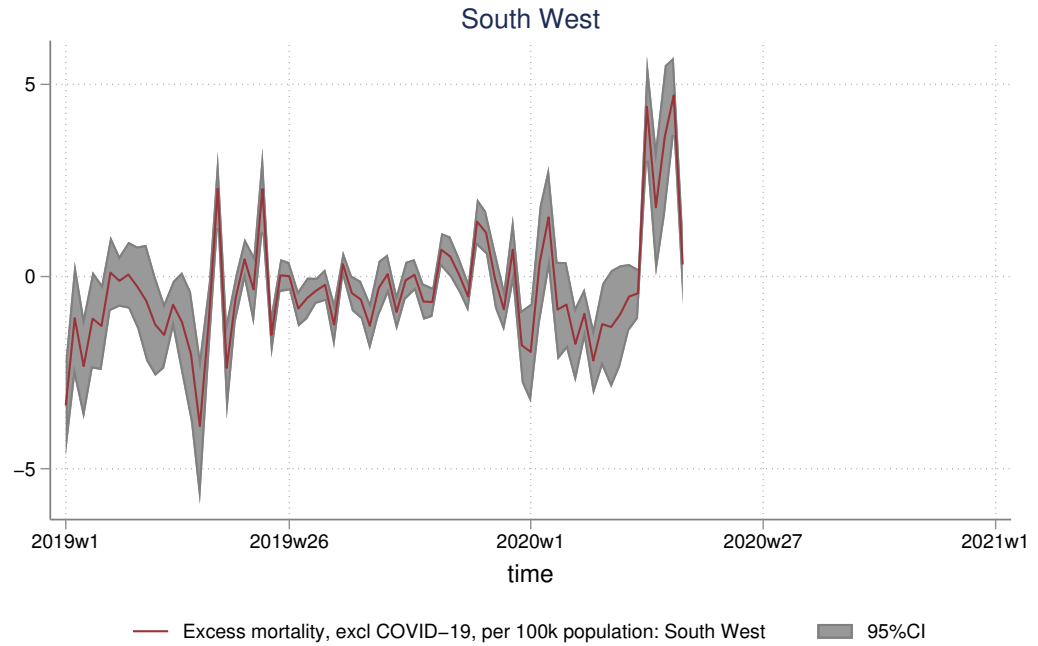

Figure 99: SW all-cause excess deaths minus COVID19, from 2020 week 1

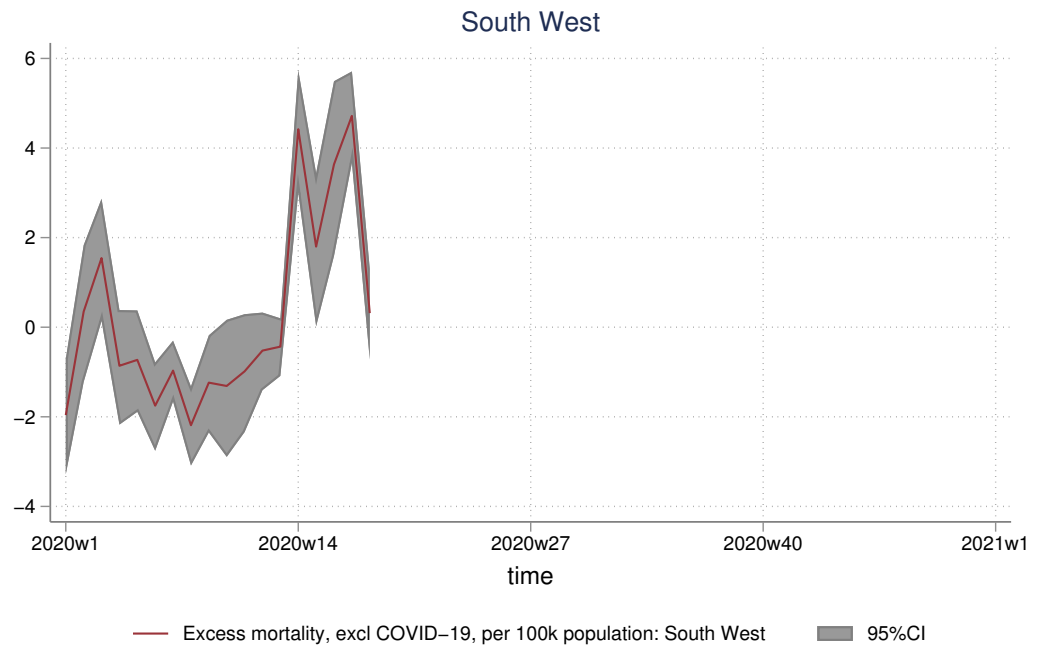

## 2.11 Wales

Figure 100: Wales Mortality time trend and model, from 2010 week 1

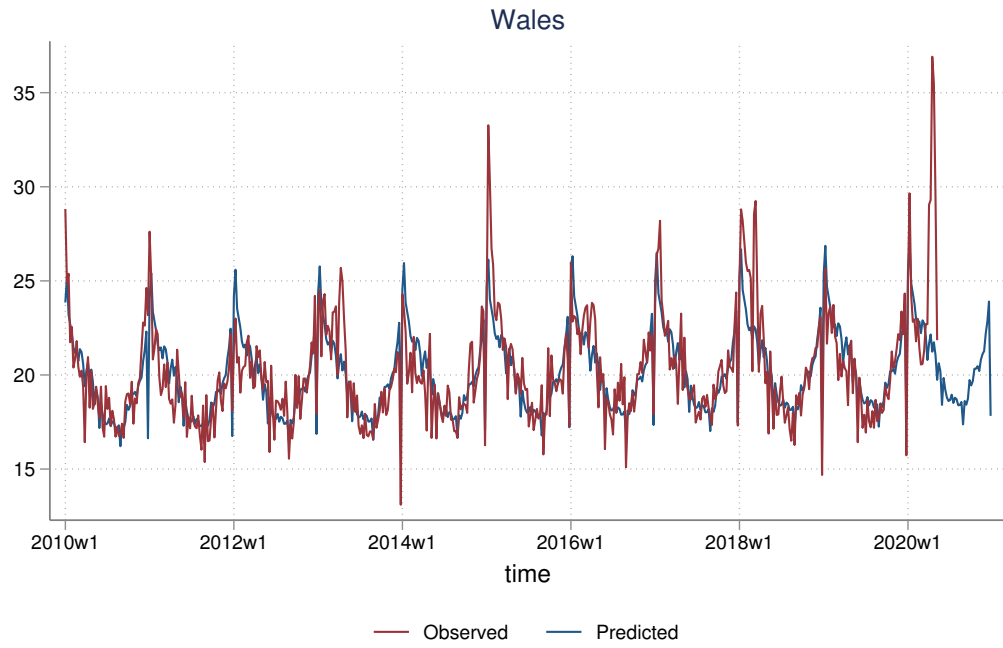



Figure 101: SE Mortality time trend and model, from 2019 week 1

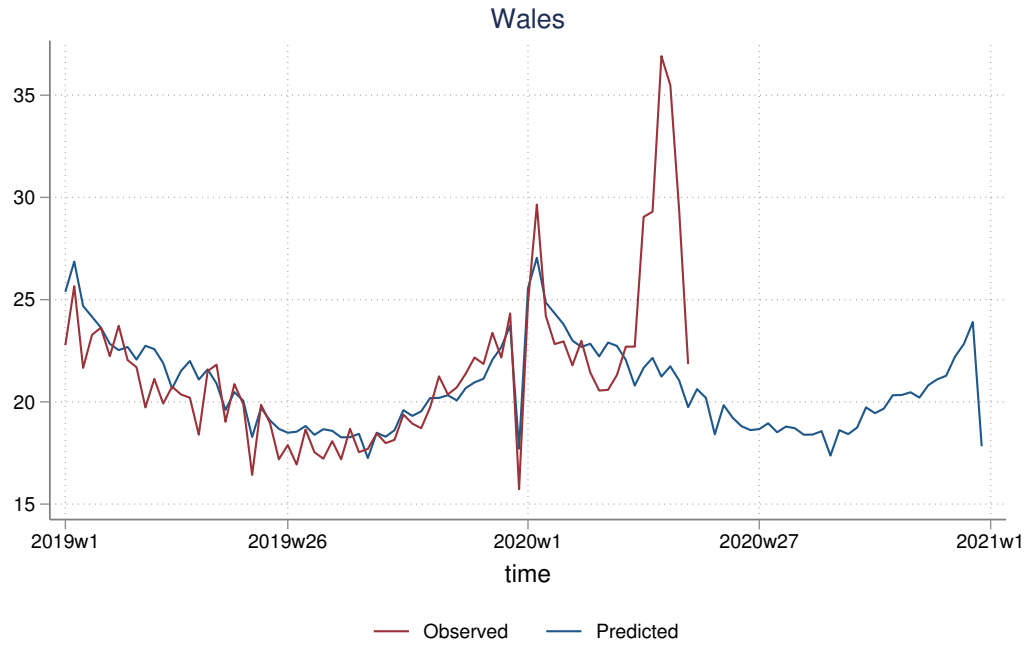

Figure 102: Wales Mortality time trend and model, from 2020 week 1

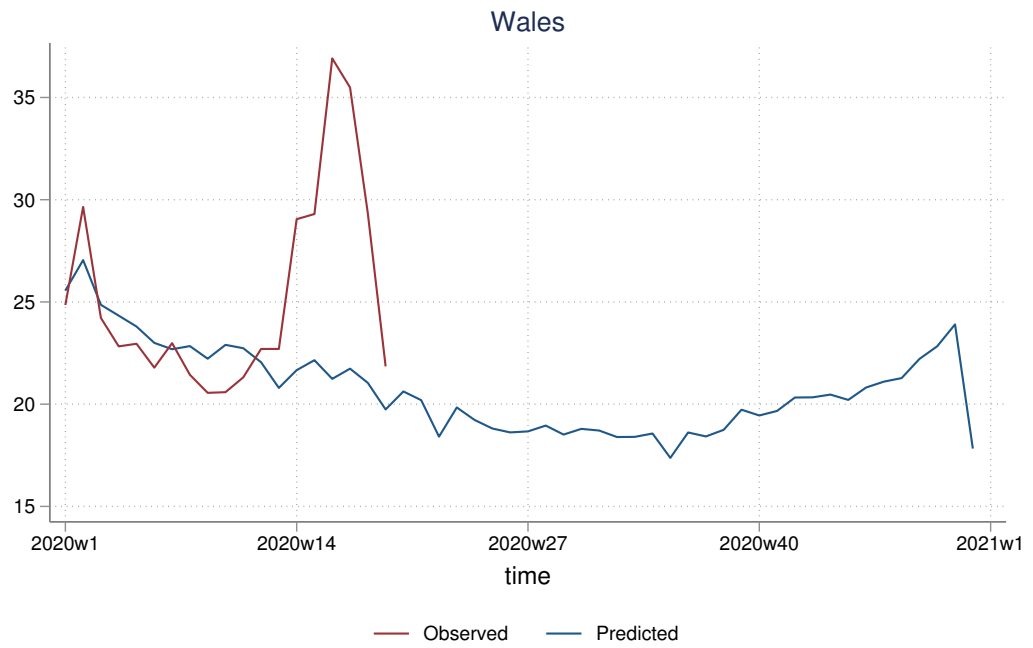

Figure 103: Wales all-cause excess deaths, from 2010 week 1

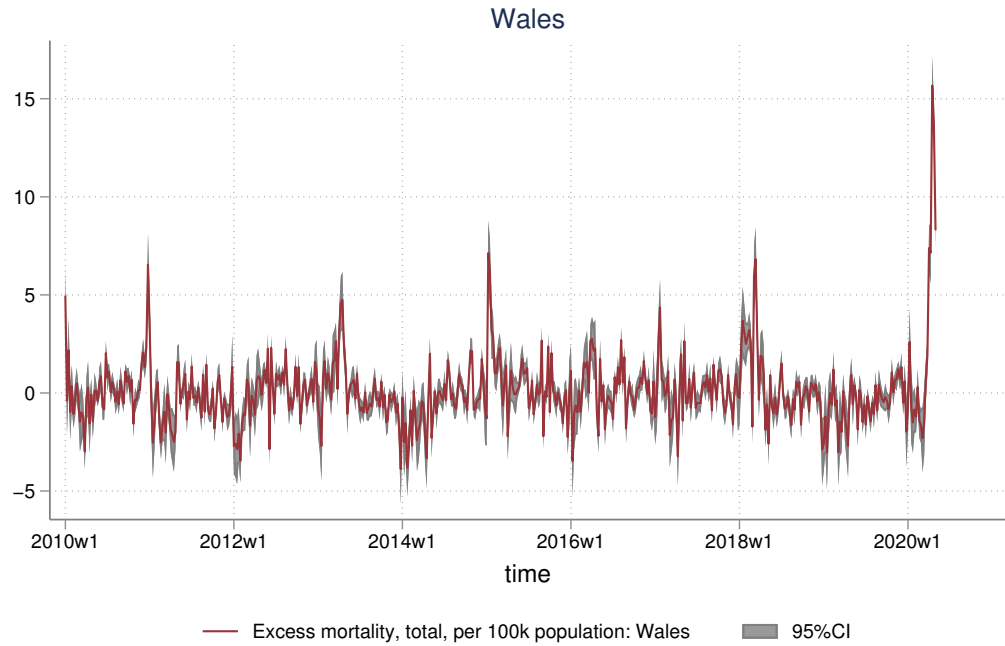

Figure 104: Wales all-cause excess deaths, from 2019 week 1

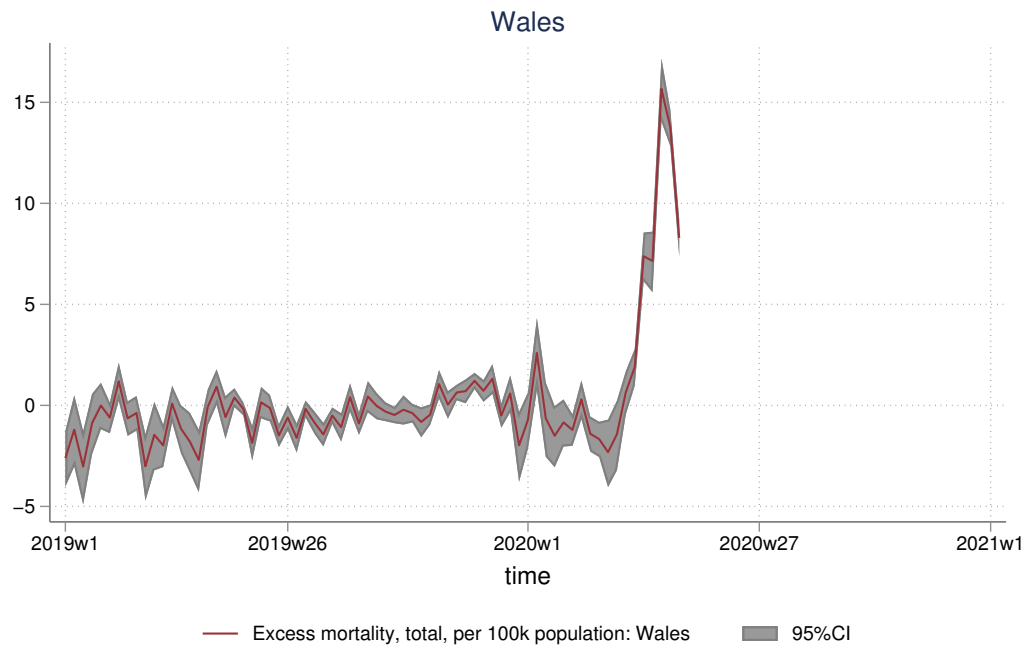



Figure 107: Wales all-cause excess deaths minus COVID19, from 2019 week 1

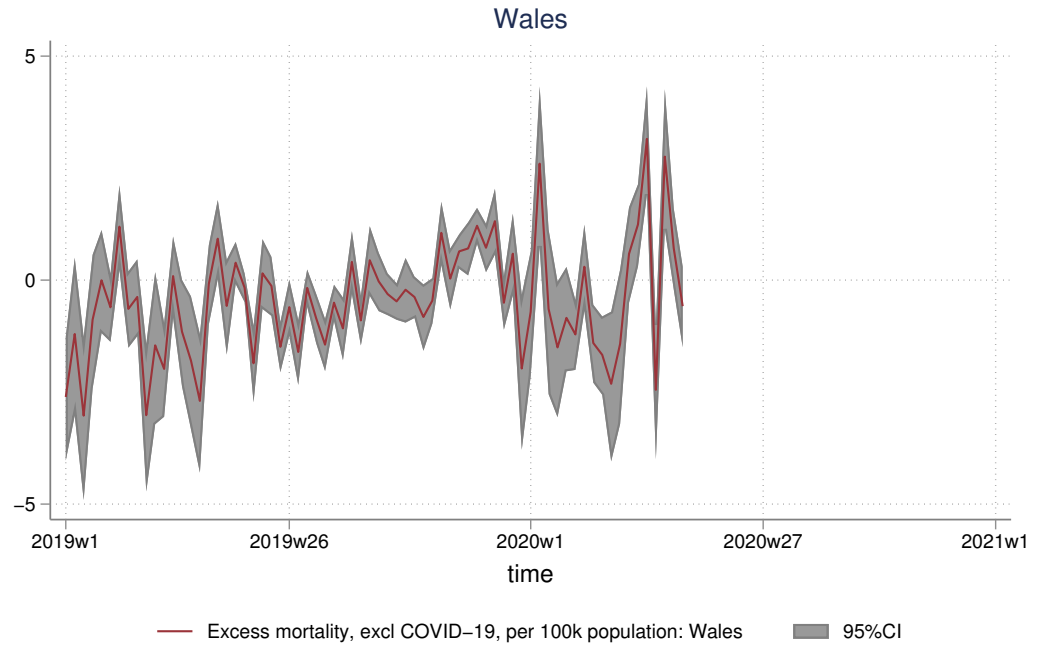

Figure 108: Wales all-cause excess deaths minus COVID19, from 2020 week 1

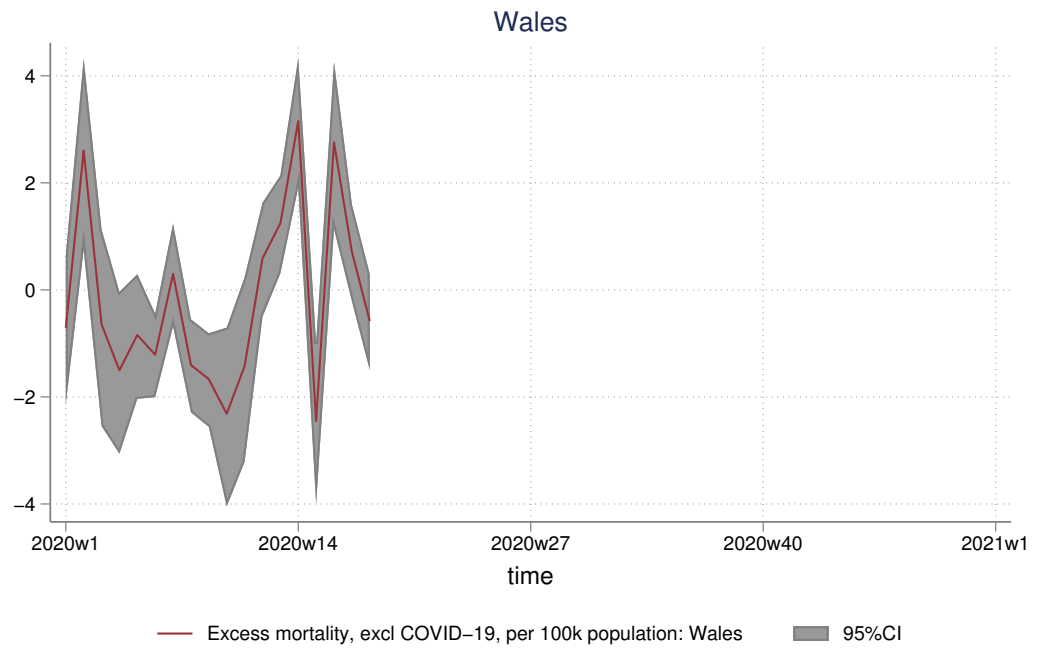

### 3 Age groups, per 100k people

#### 3.1 Time trends

Figure 109: All age group mortality time trends, from 2010 week 1

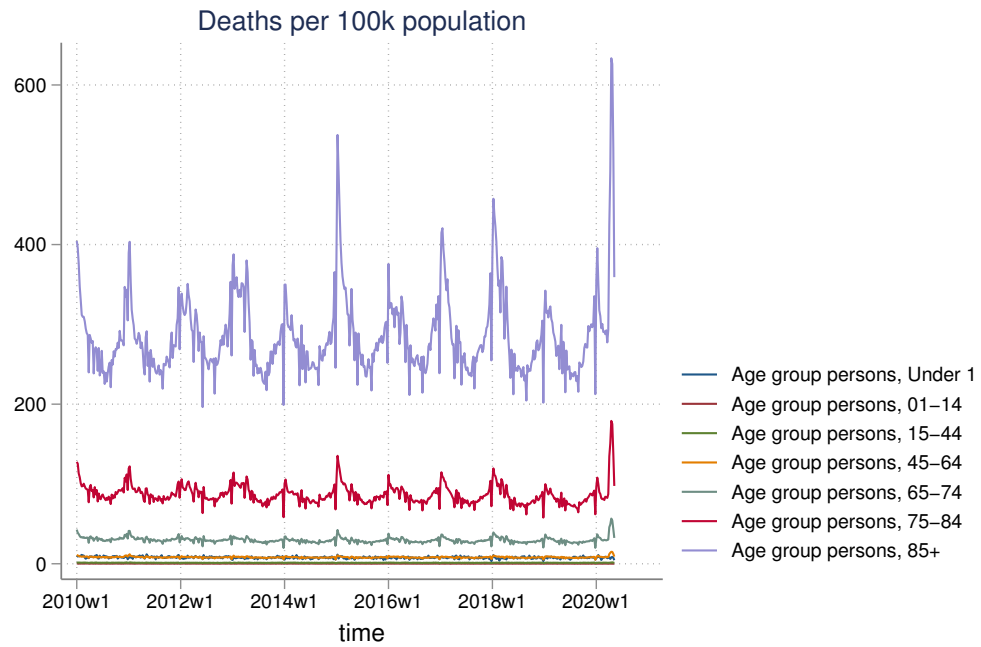

Figure 110: All age group mortality time trends, from 2019 week 1

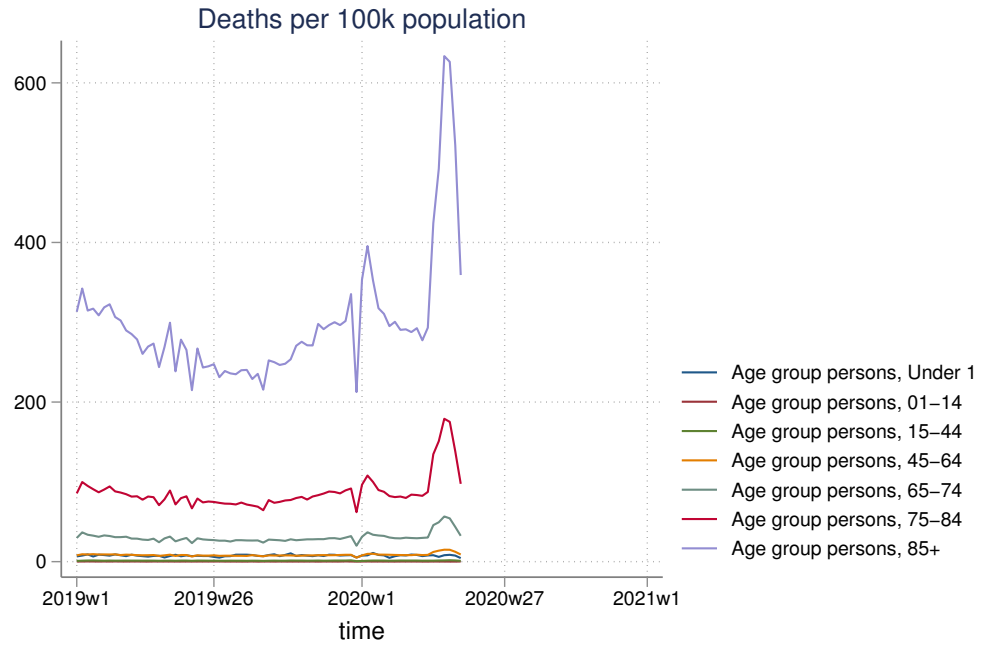

Figure 111: All age group mortality time trends, from 2020 week 1

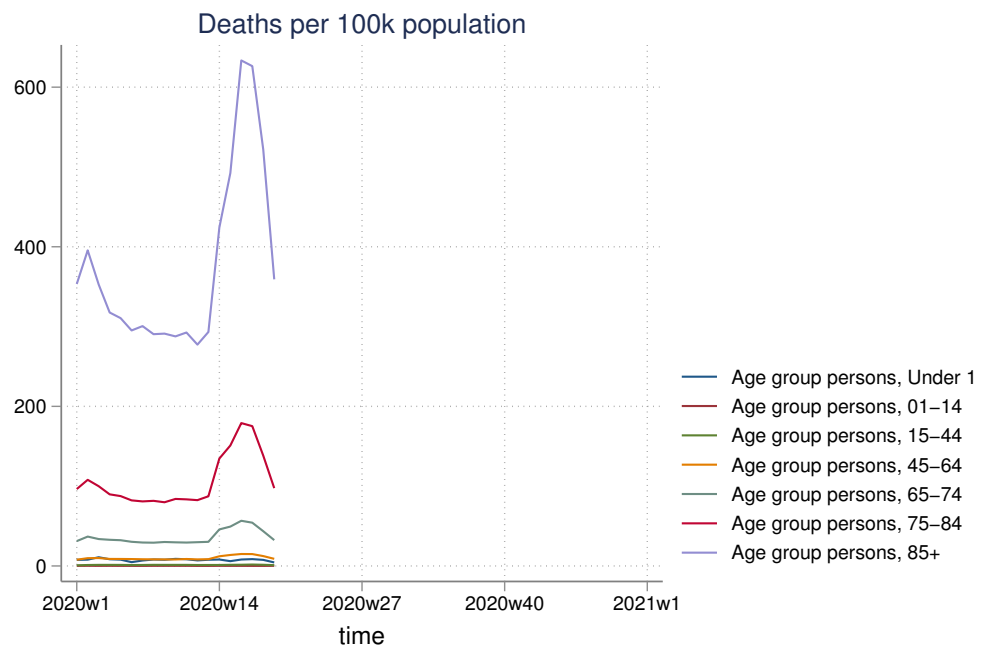

### 3.2 All aged under 1

Figure 112: All < 1 mortality time trend and model, from 2010 week 1

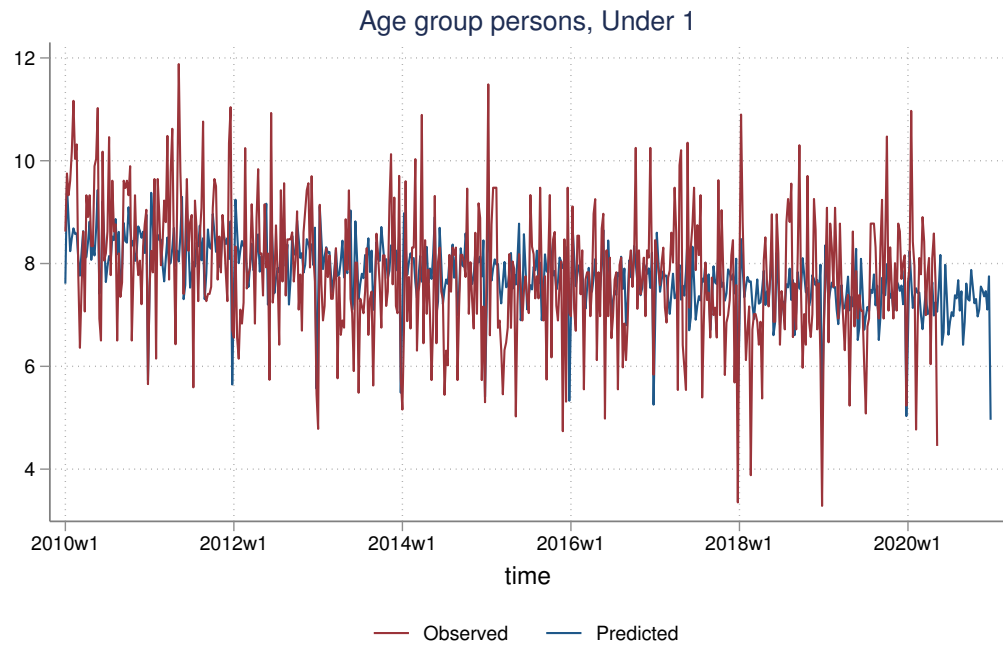

Figure 113: All < 1 mortality time trend and model, from 2019 week 1

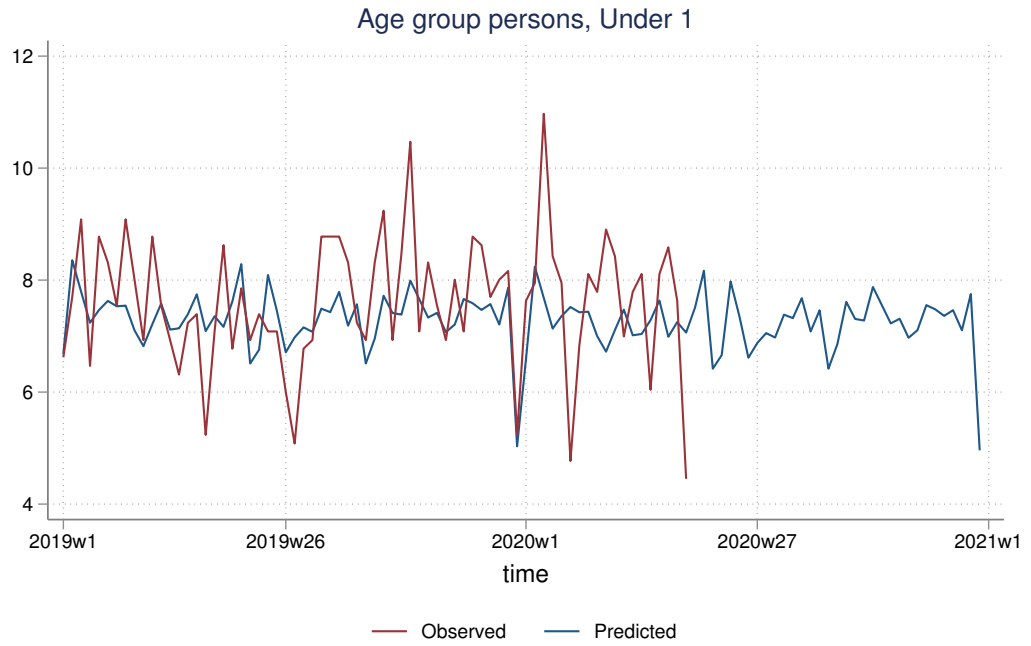

Figure 114: All < 1 mortality time trend and model, from 2020 week 1

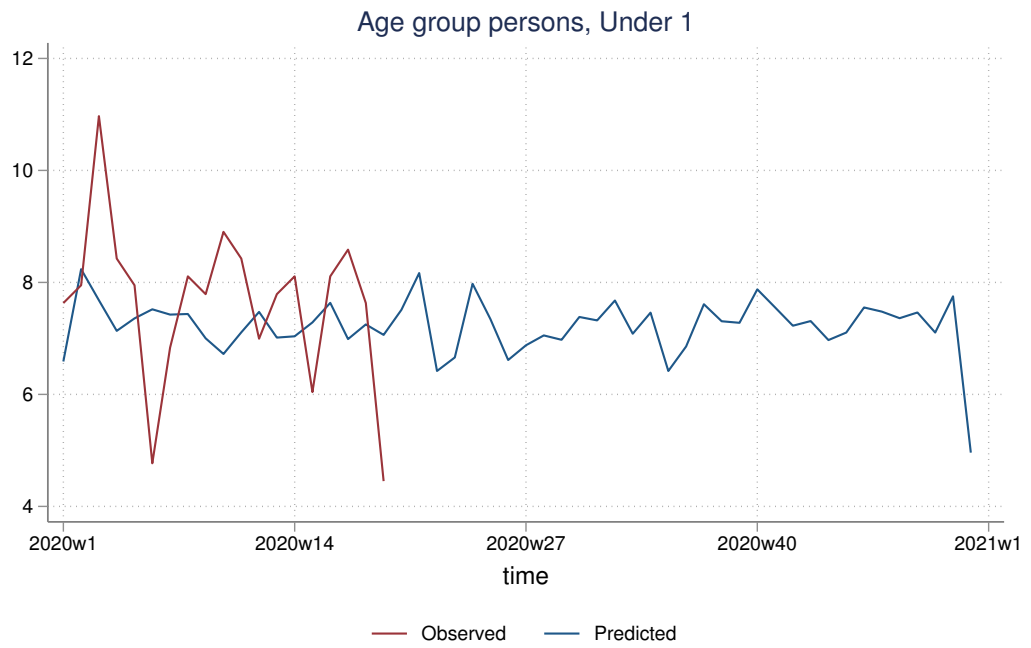



Figure 115: All < 1 all-cause excess deaths, from 2010 week 1

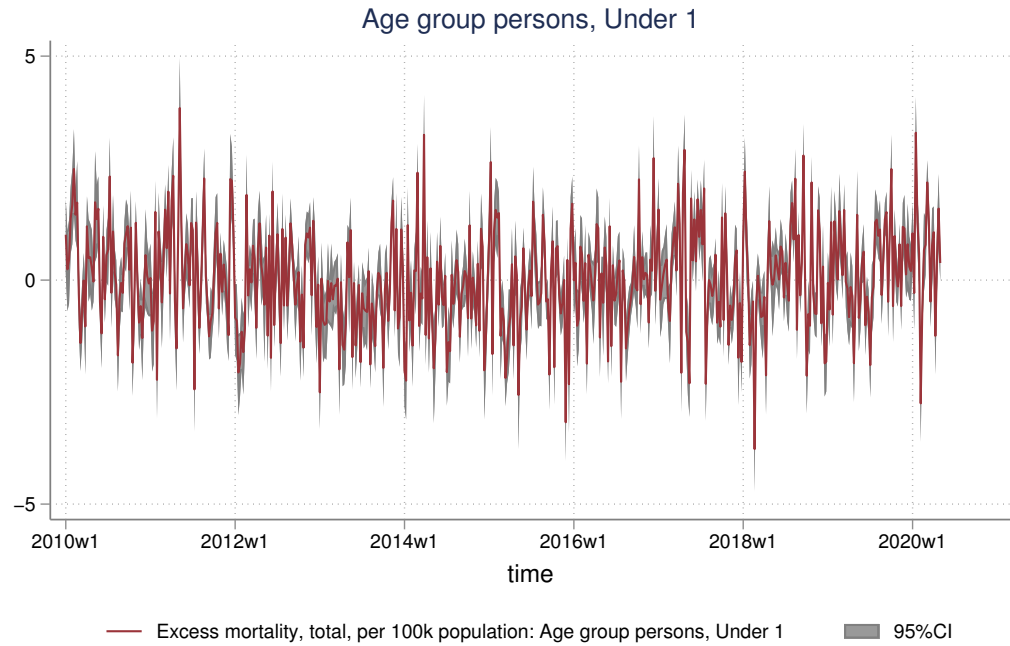

Figure 116: All < 1 all-cause excess deaths, from 2019 week 1

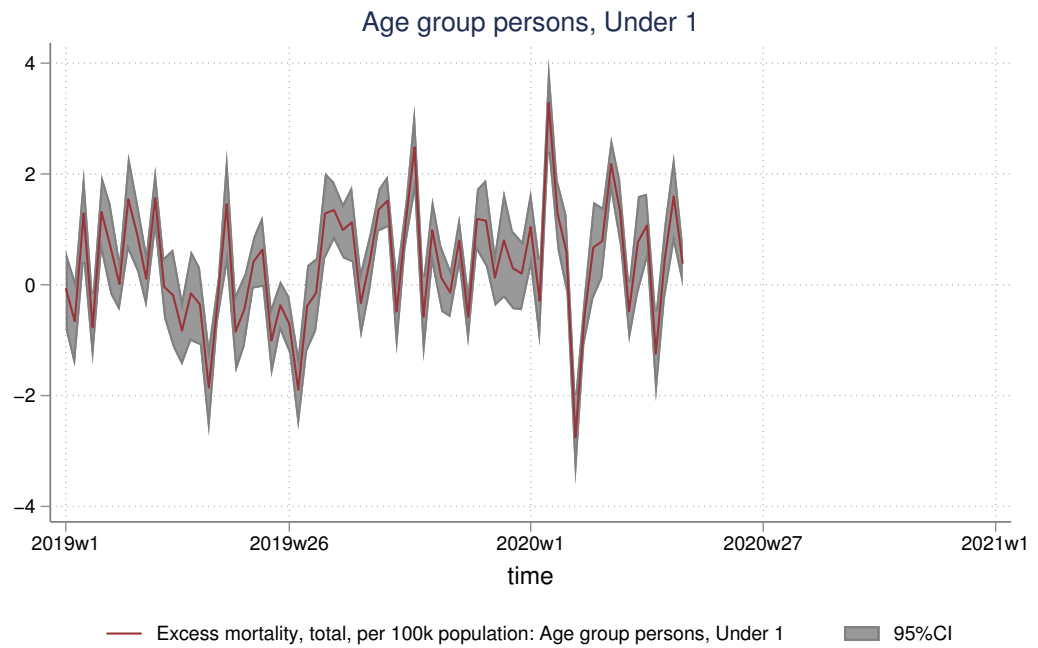

Figure 117: All < 1 all-cause excess deaths, from 2020 week 1

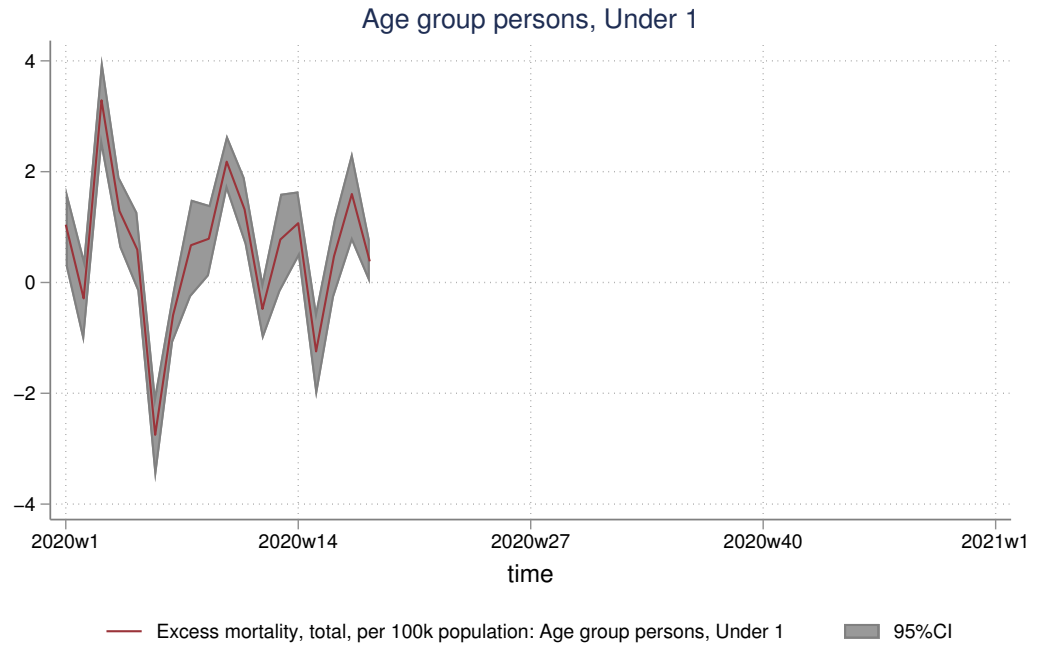

Figure 118: All < 1 all-cause excess deaths minus COVID19, from 2010 week 1

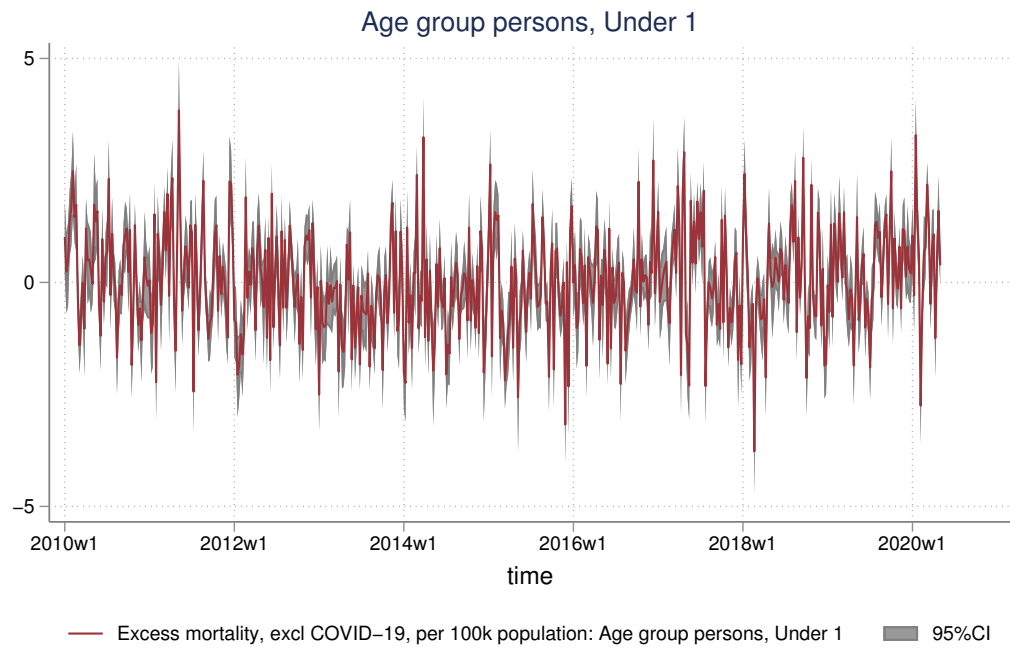

Figure 119: All < 1 all-cause excess deaths minus COVID19, from 2019 week 1

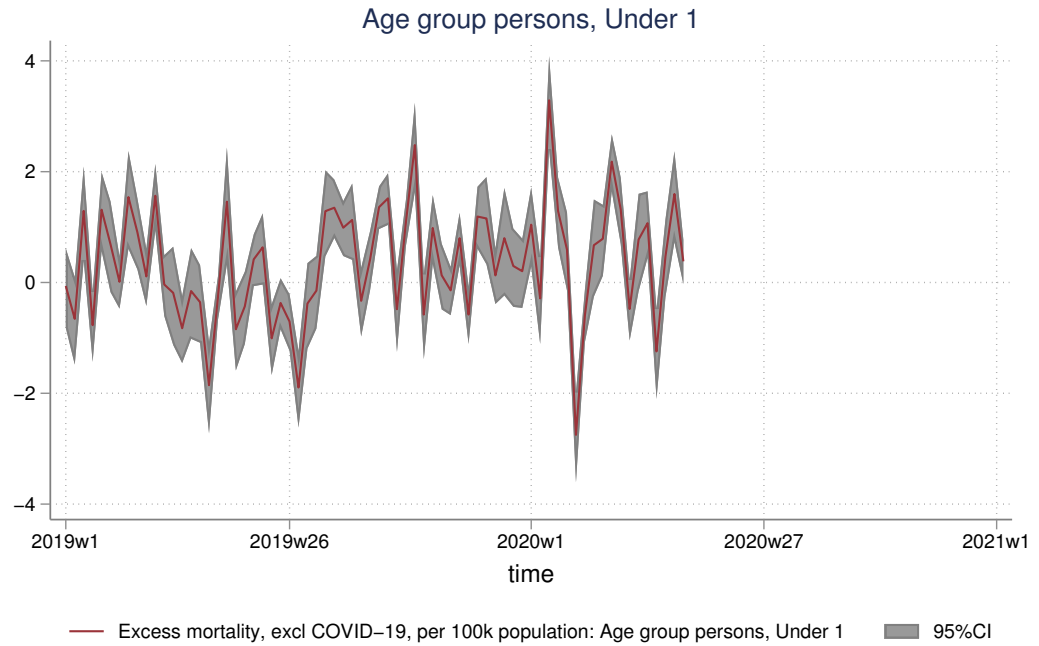

Figure 120: All < 1 all-cause excess deaths minus COVID19, from 2020 week 1

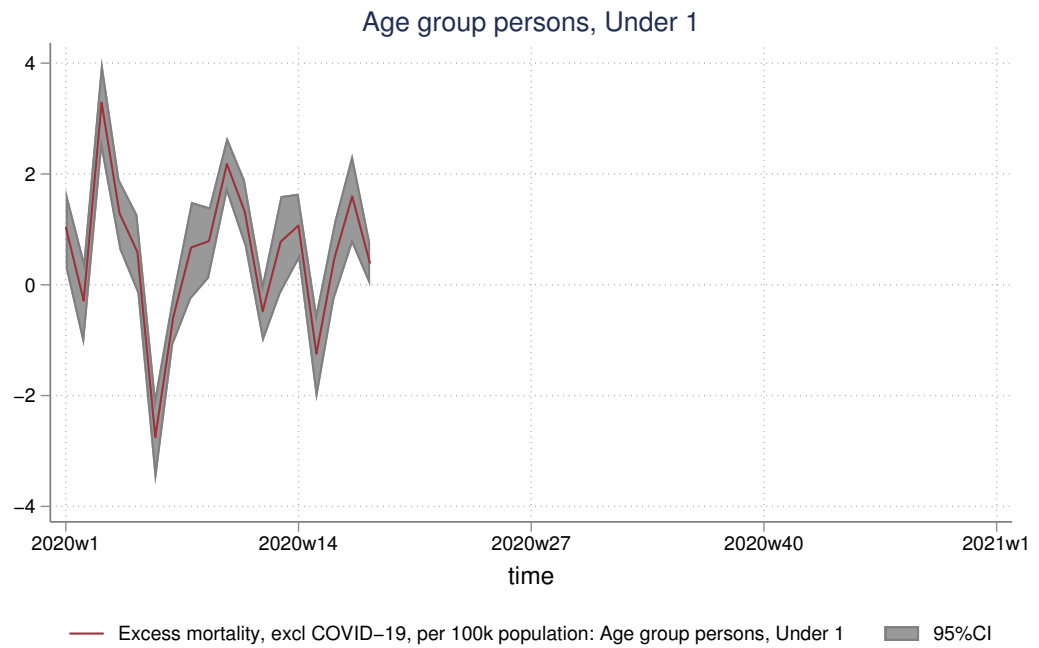

### 3.3 All aged 01-14

Figure 121: All 01-14 mortality time trend and model, from 2010 week 1

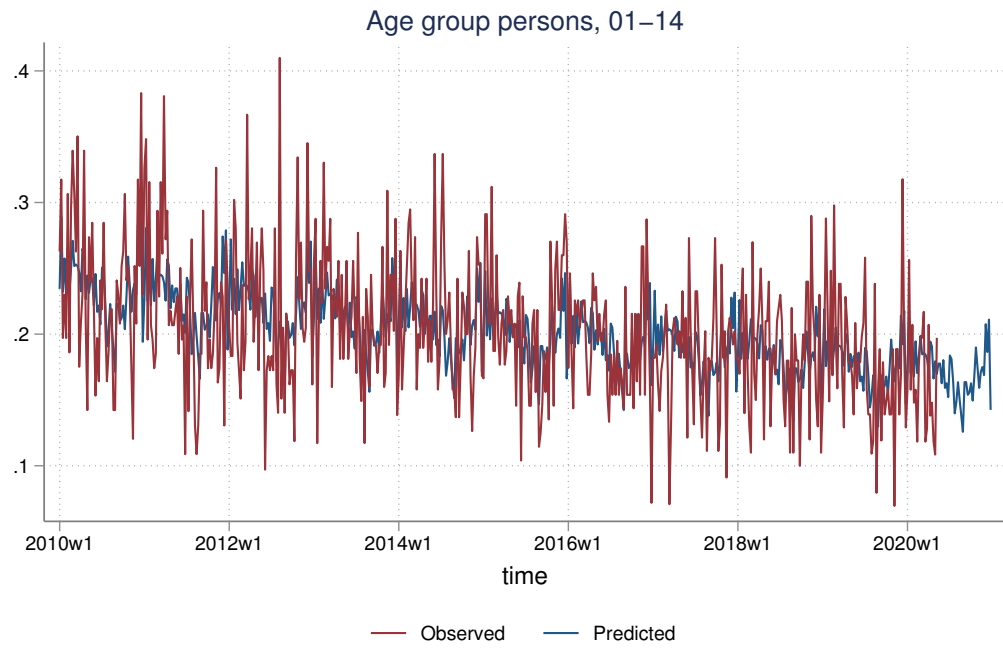

Figure 122: All 01-14 mortality time trend and model, from 2019 week 1

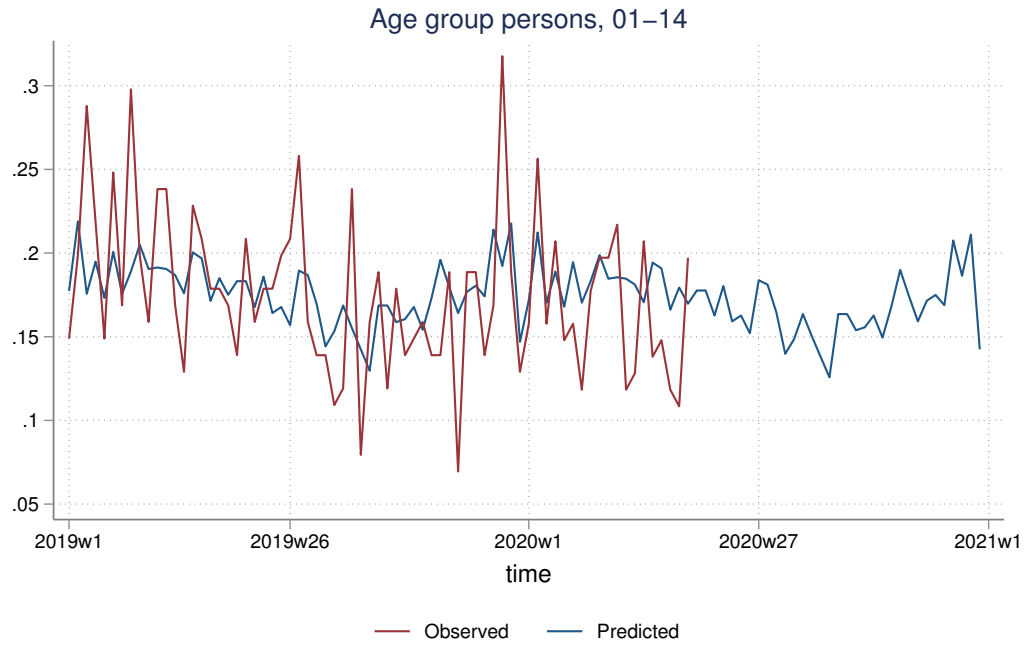

Figure 123: All 01-14 mortality time trend and model, from 2020 week 1

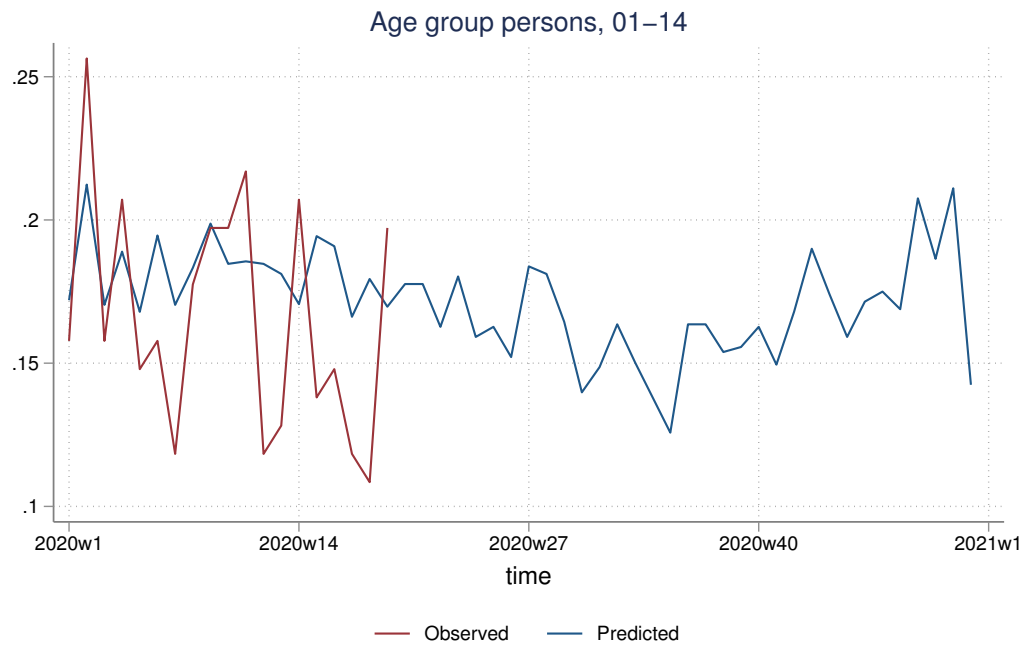

Figure 124: All 01-14 all-cause excess deaths, from 2010 week 1

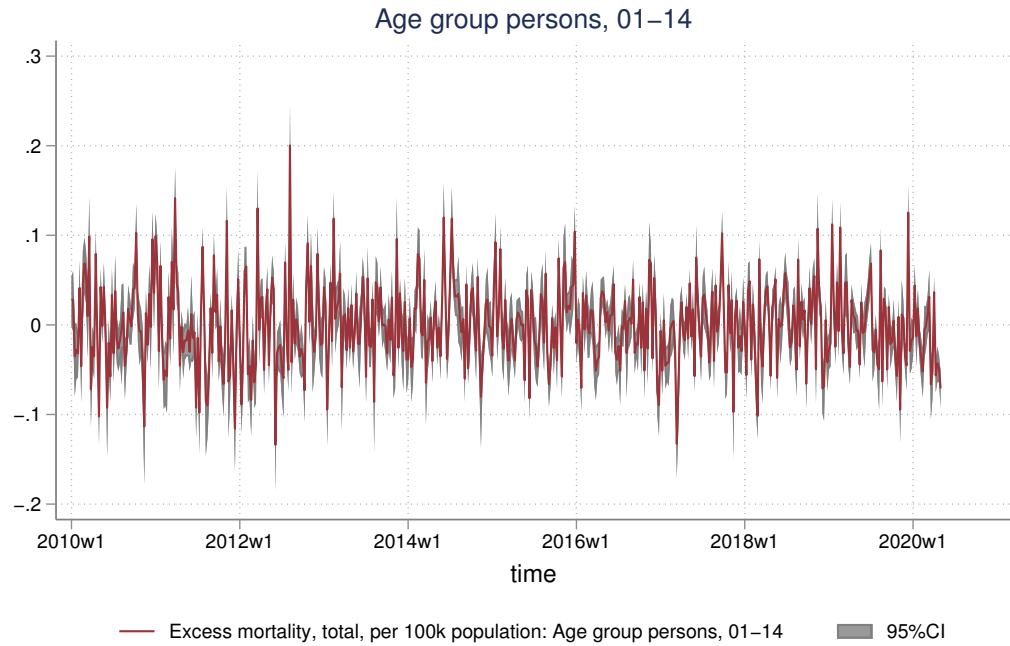

Figure 125: All 01-14 all-cause excess deaths, from 2019 week 1

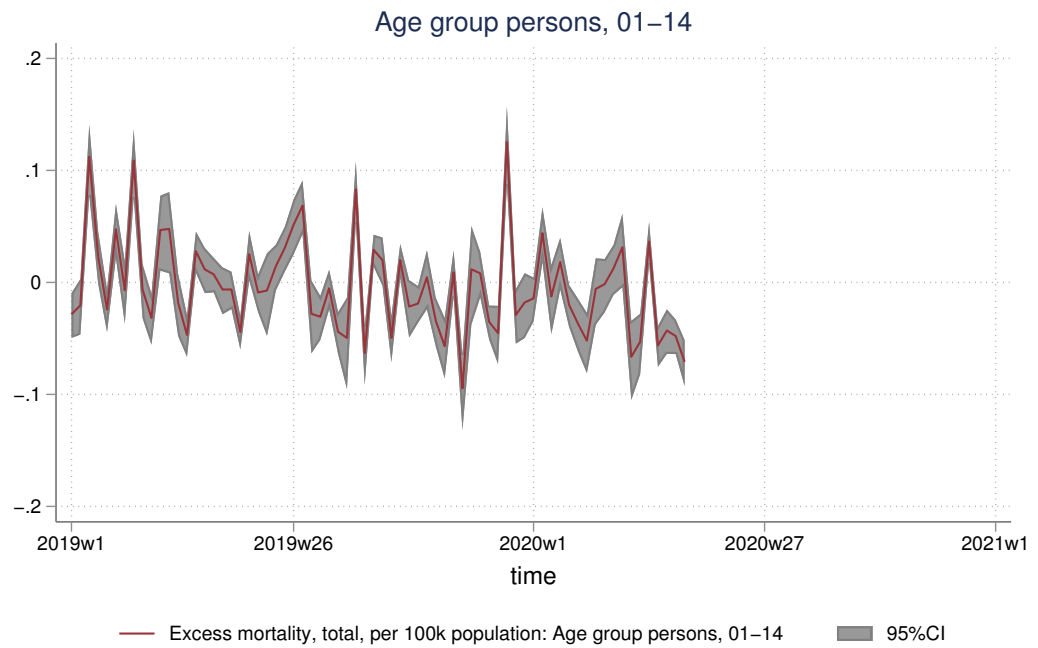

Figure 126: All 01-14 all-cause excess deaths, from 2020 week 1

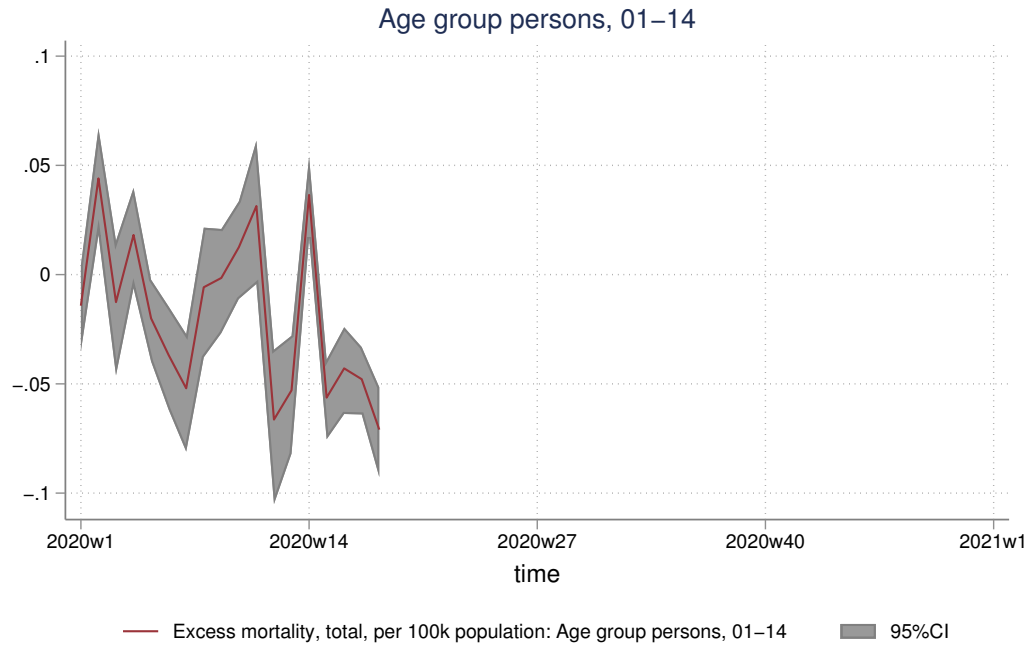

Figure 127: All 01-14 all-cause excess deaths (-COVID19), from 2010 week 1

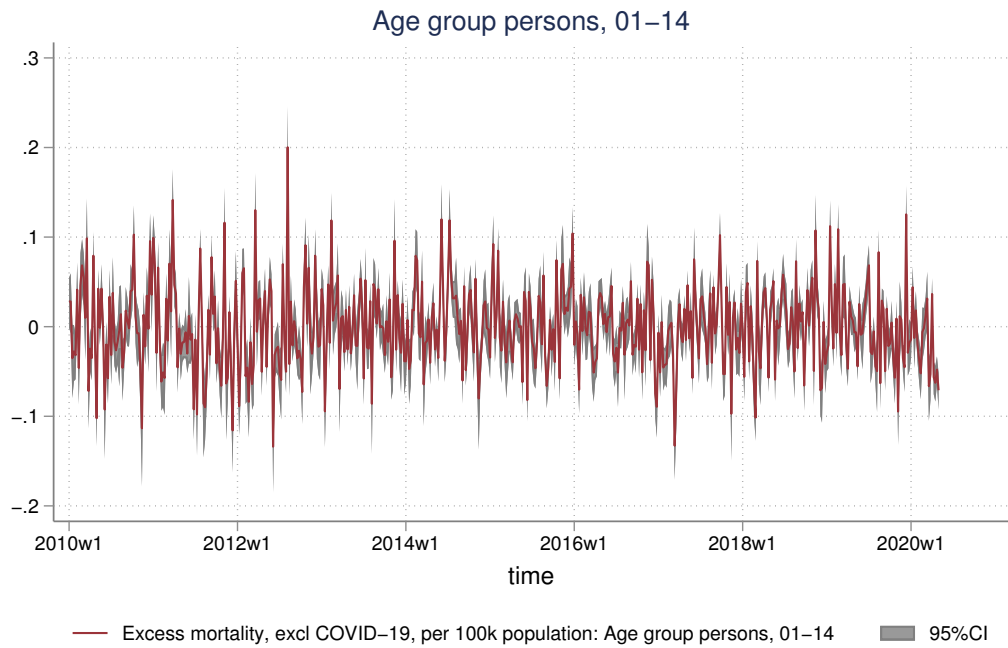

Figure 128: All 01-14 all-cause excess deaths (-COVID19), from 2019 week 1

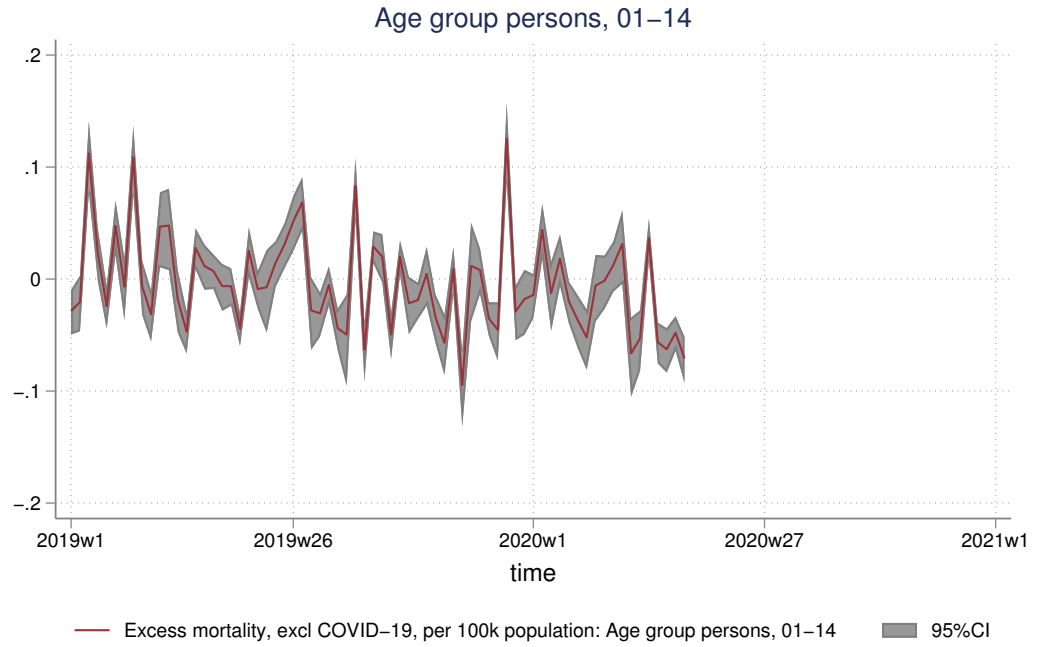

Figure 129: All 01-14 all-cause excess deaths (-COVID19), from 2020 week 1

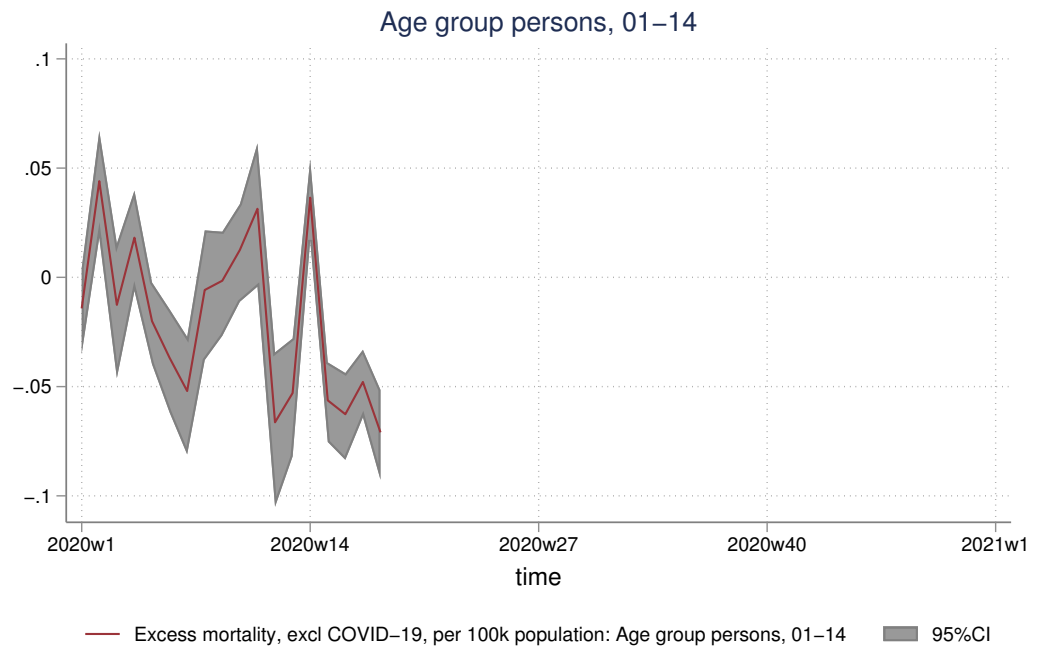



### 3.4 All aged 15-44

Figure 130: All 15-44 mortality time trend and model, from 2010 week 1

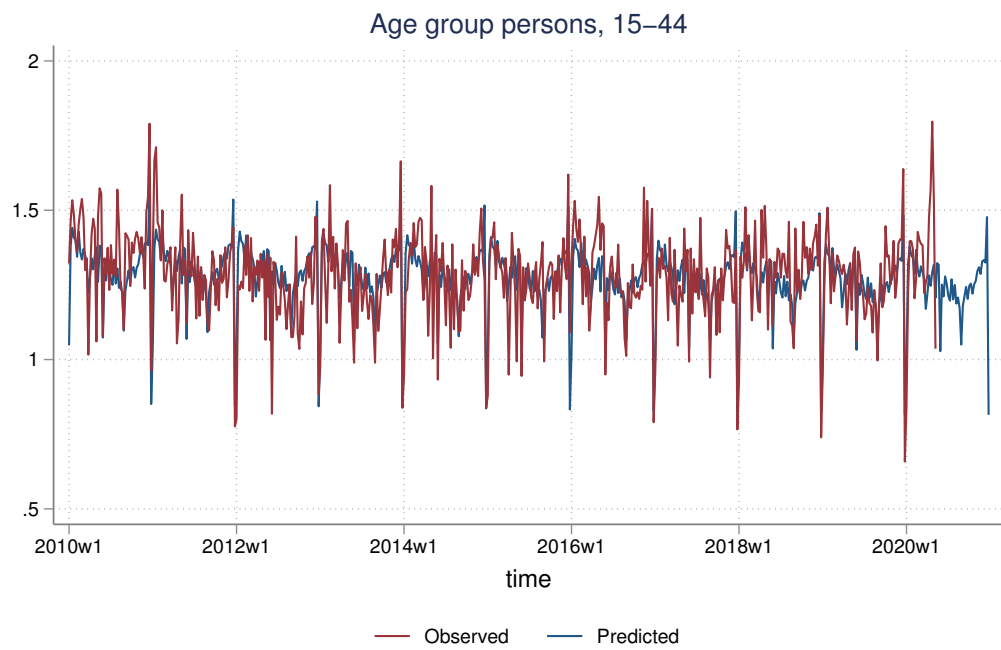

Figure 131: All 15-44 mortality time trend and model, from 2019 week 1

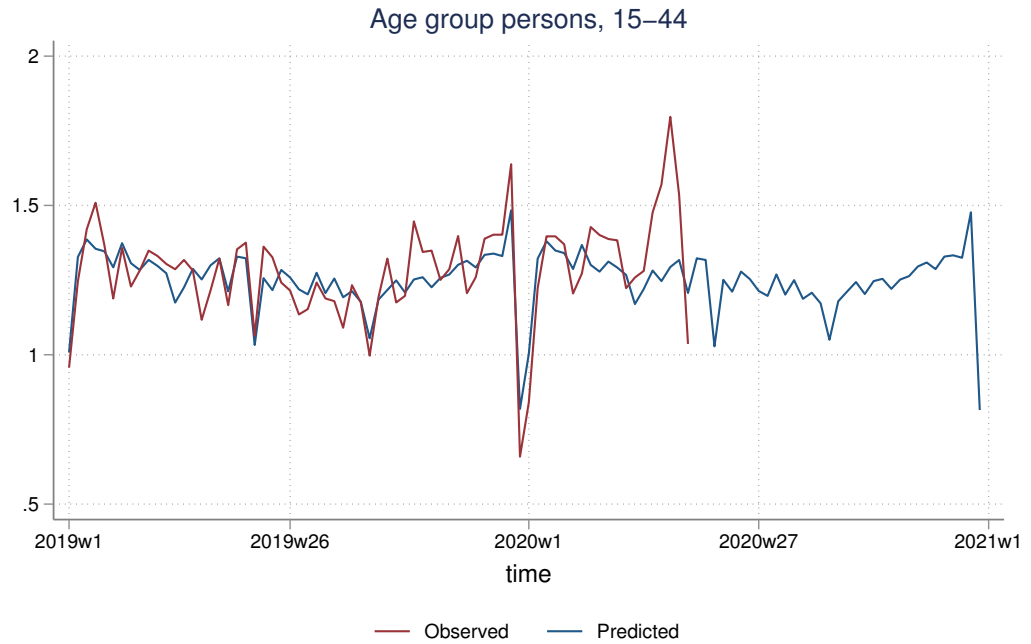

Figure 132: All 15-44 mortality time trend and model, from 2020 week 1

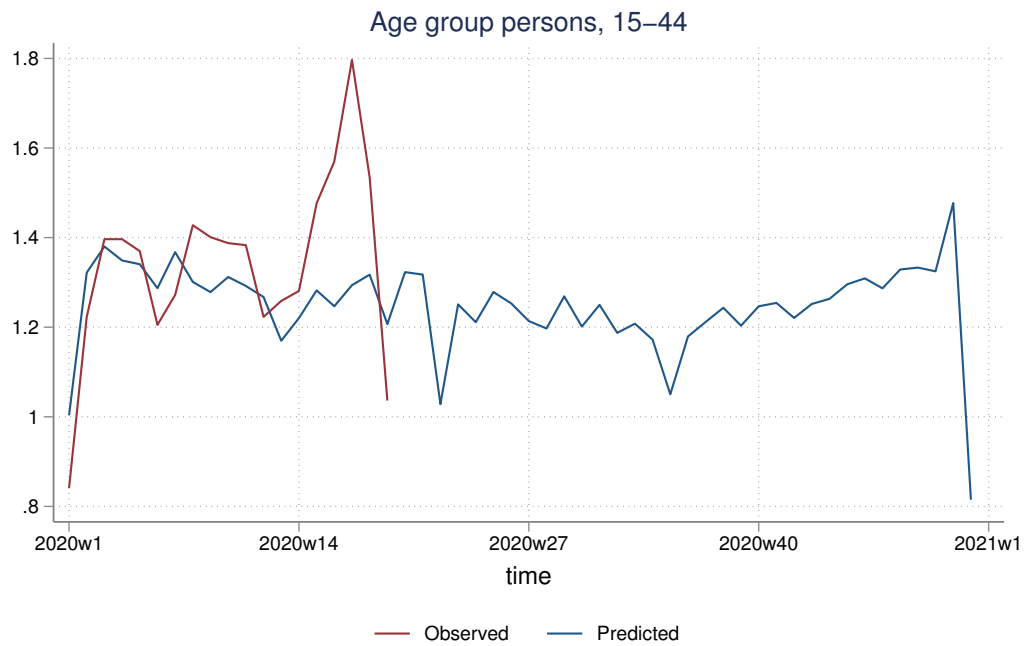

Figure 133: All 15-44 all-cause excess deaths, from 2010 week 1

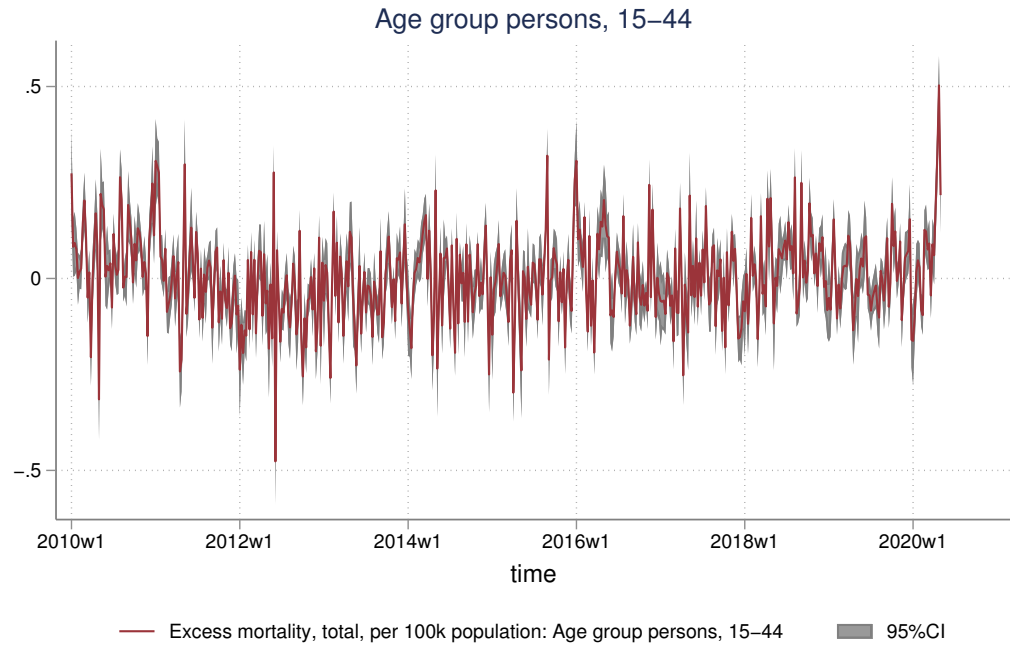

Figure 134: All 15-44 all-cause excess deaths, from 2019 week 1

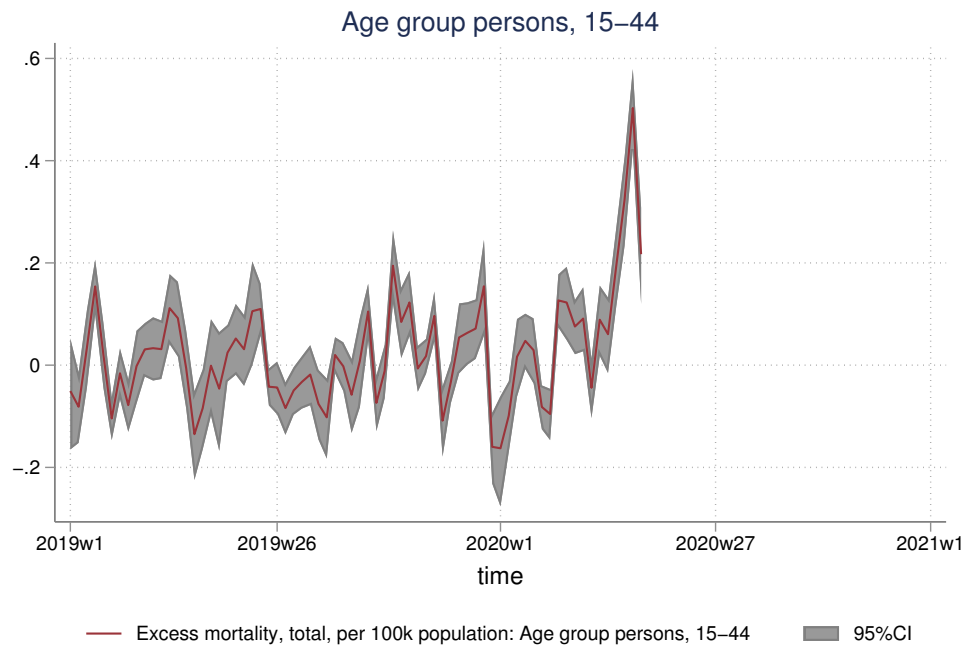

Figure 135: All 15-44 all-cause excess deaths, from 2020 week 1

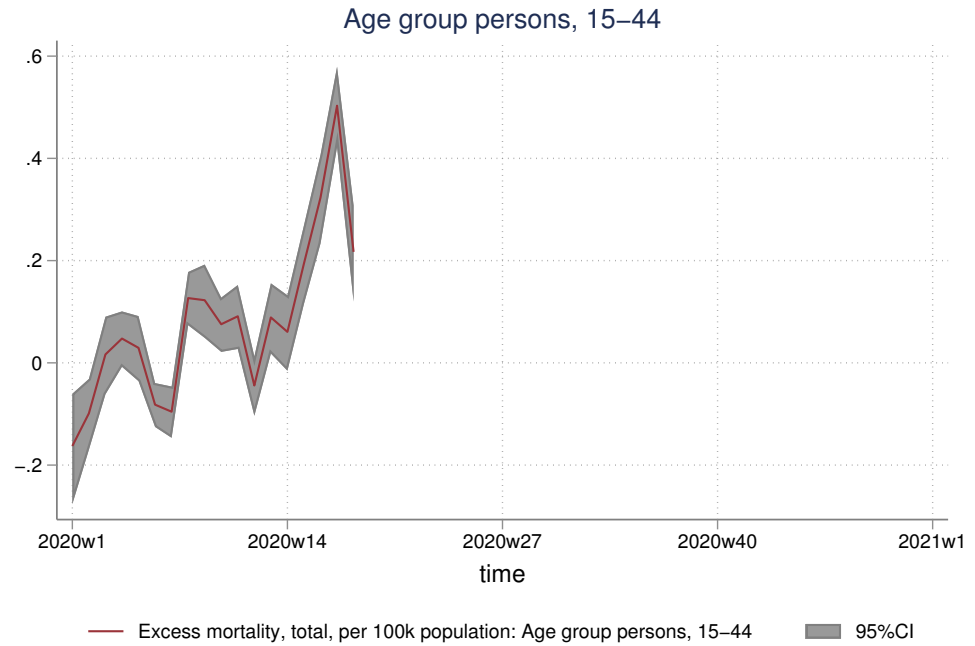

Figure 136: All 15-44 all-cause excess deaths (-COVID19), from 2010 week 1

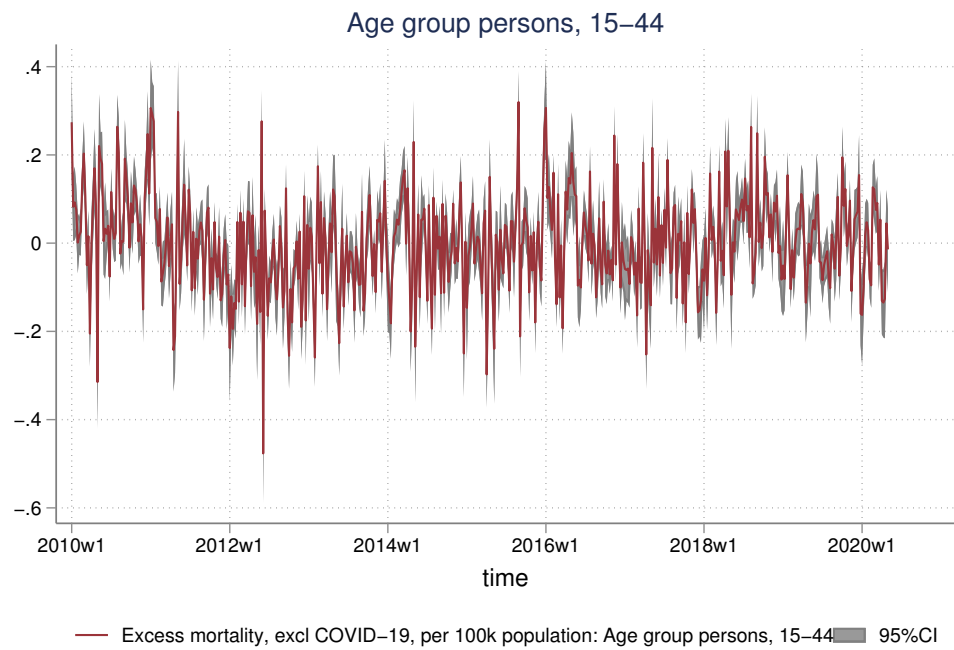

Figure 137: All 15-44 all-cause excess deaths (-COVID19), from 2019 week 1

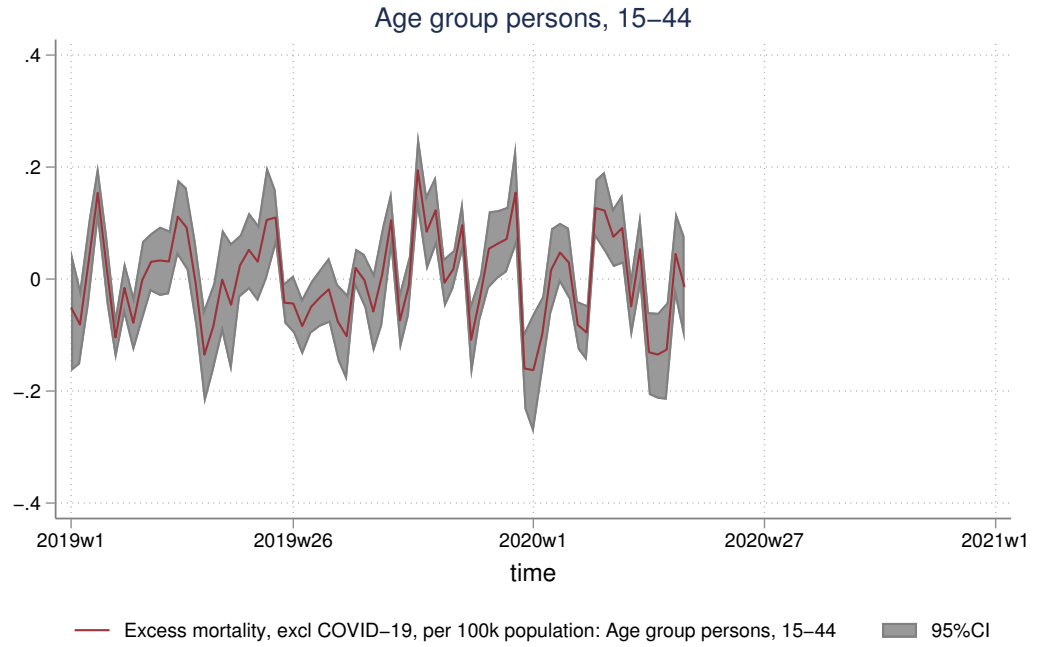

Figure 138: All 15-44 all-cause excess deaths (-COVID19), from 2020 week 1

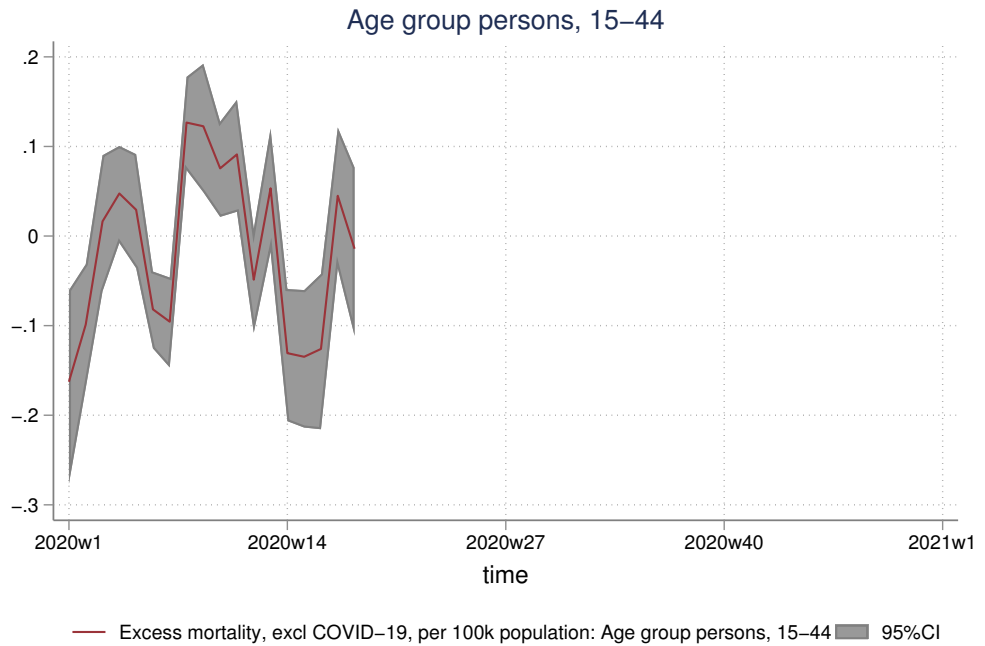

### 3.5 All aged 45-64

Figure 139: All 45-64 mortality time trend and model, from 2010 week 1

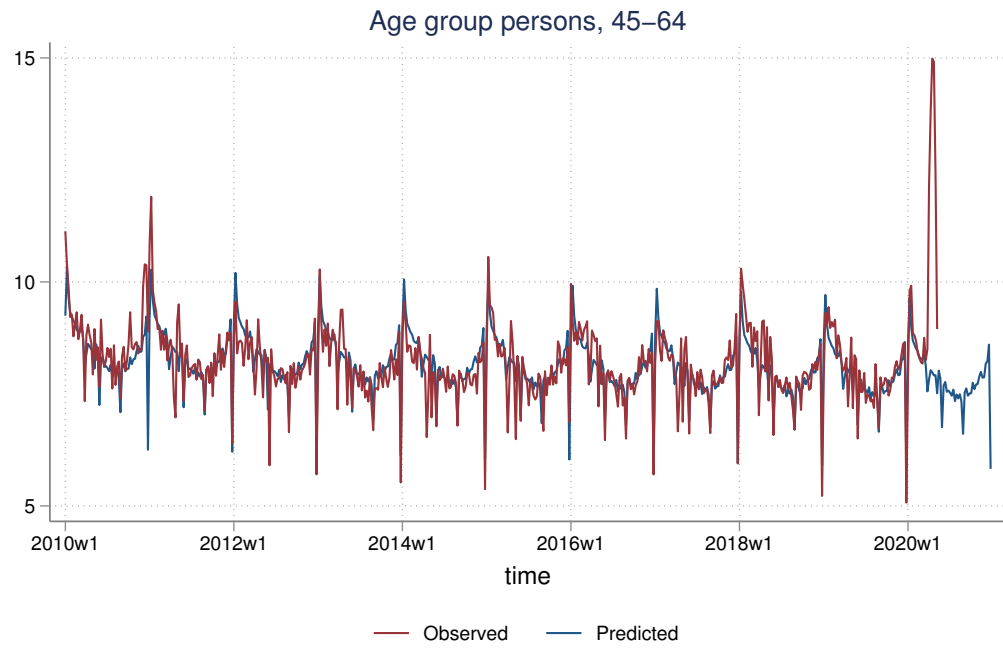

Figure 140: All 45-64 mortality time trend and model, from 2019 week 1

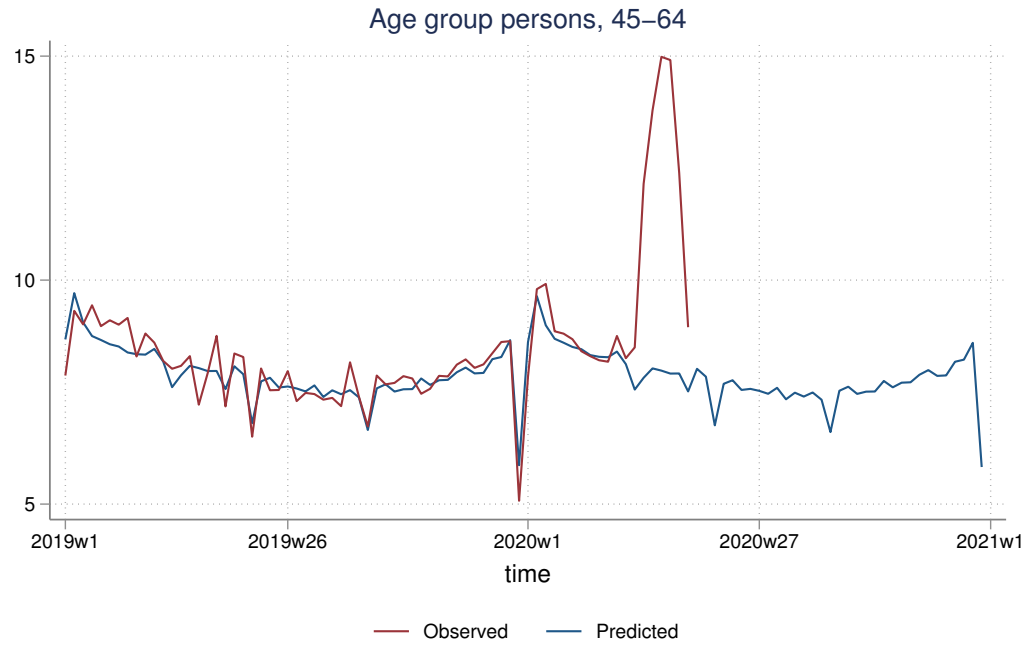

Figure 141: All 45-64 mortality time trend and model, from 2020 week 1

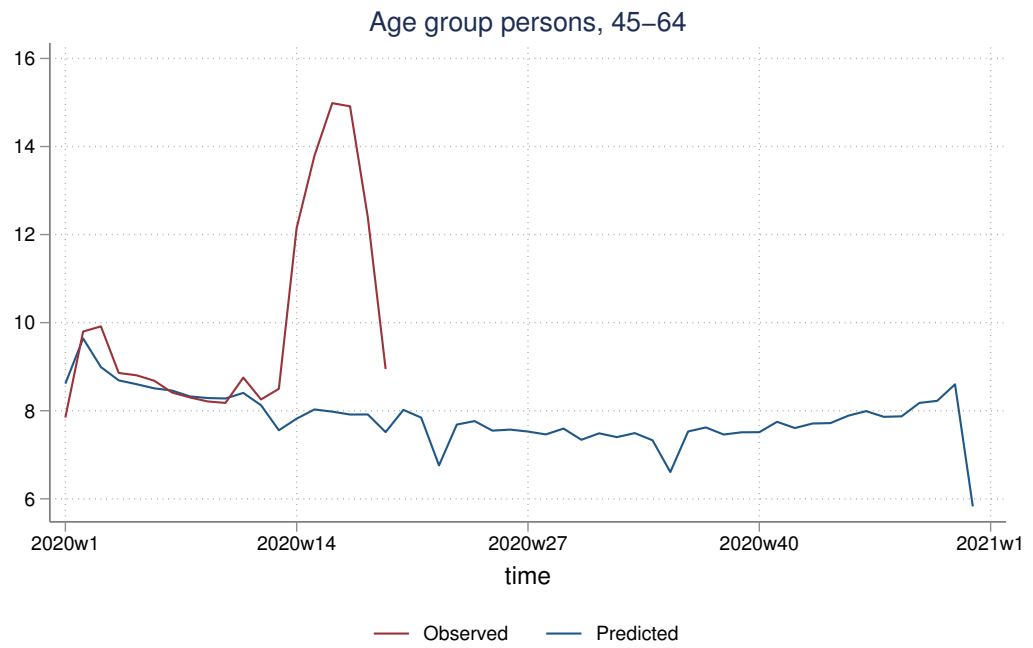

Figure 142: All 45-64 all-cause excess deaths, from 2010 week 1

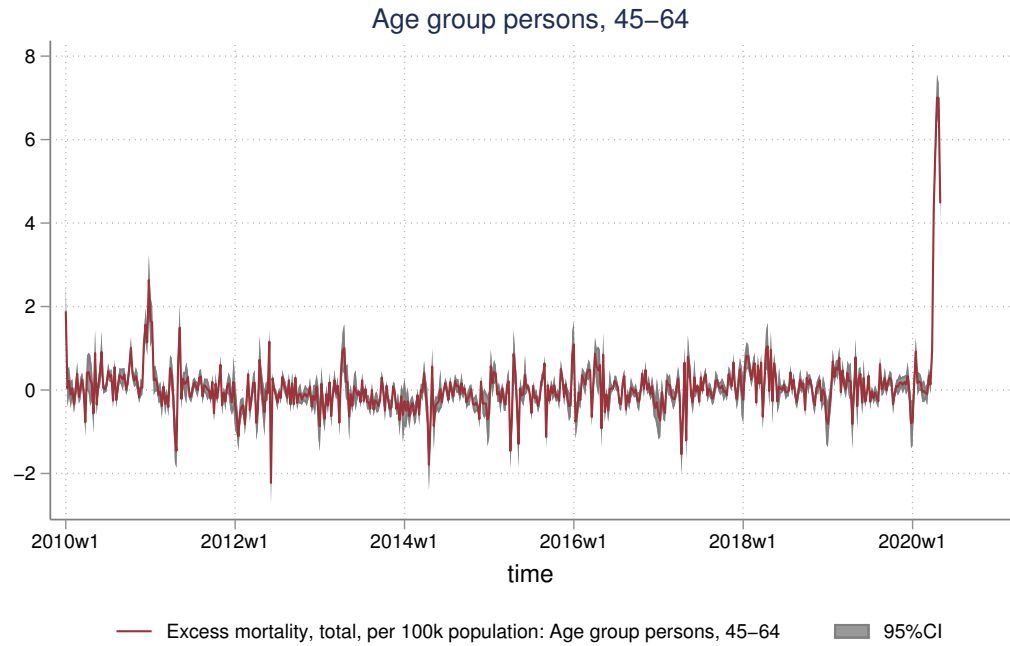

Figure 143: All 45-64 all-cause excess deaths, from 2019 week 1

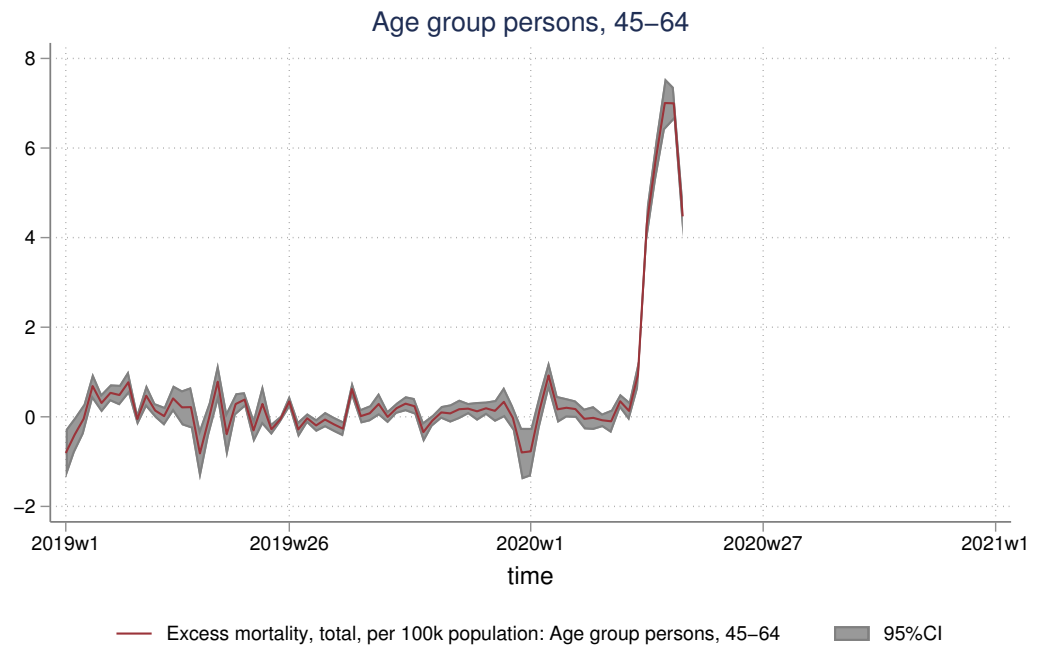



Figure 144: All 45-64 all-cause excess deaths, from 2020 week 1

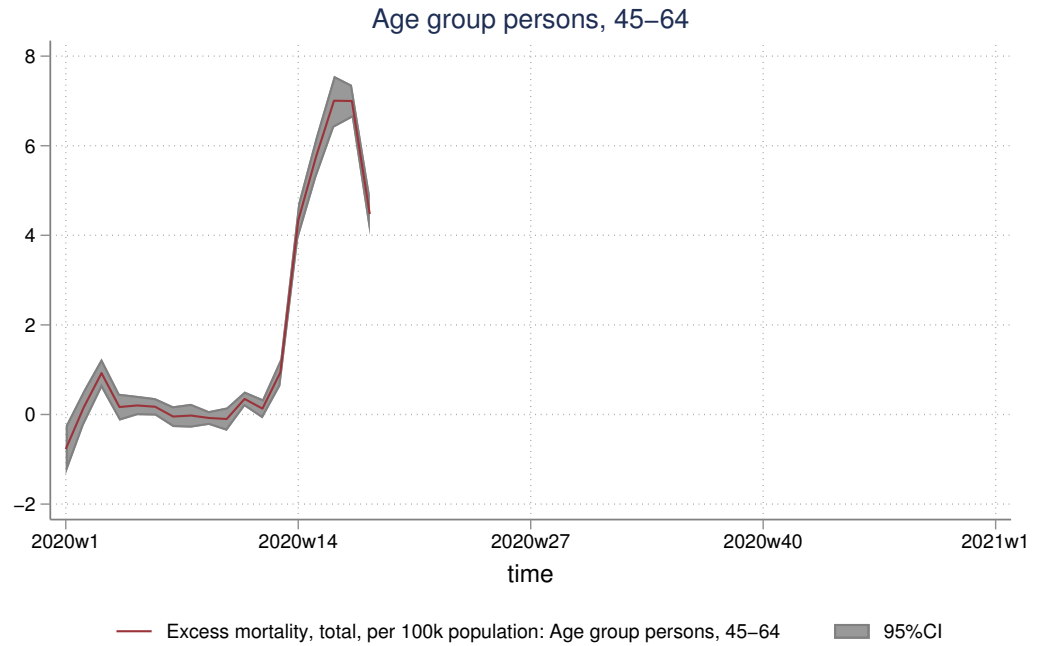

Figure 145: All 45-64 all-cause excess deaths (-COVID19), from 2010 week 1

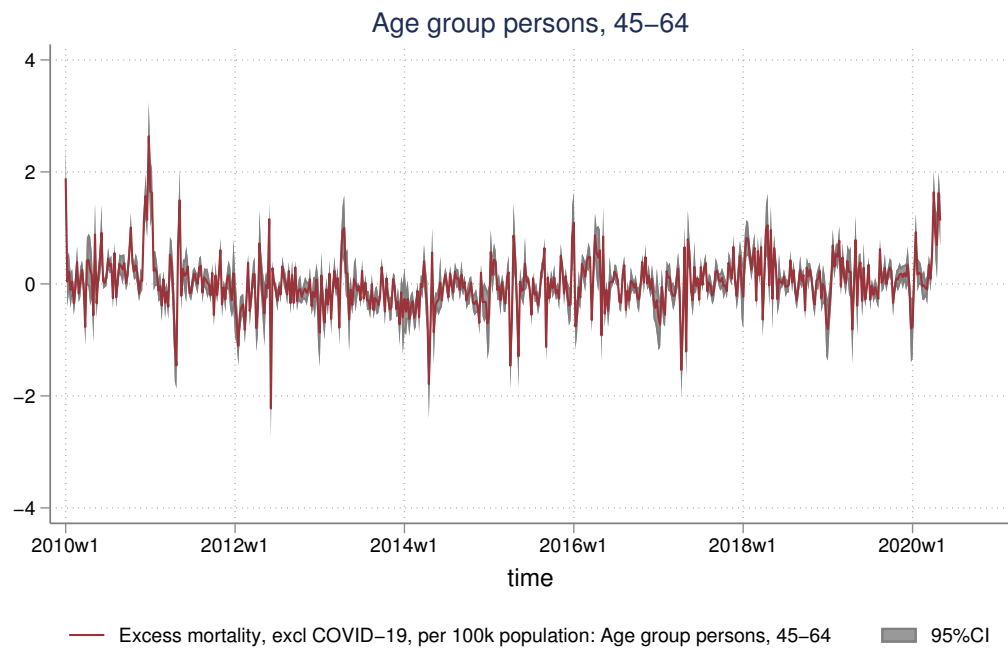

Figure 146: All 45-64 all-cause excess deaths (-COVID19), from 2019 week 1

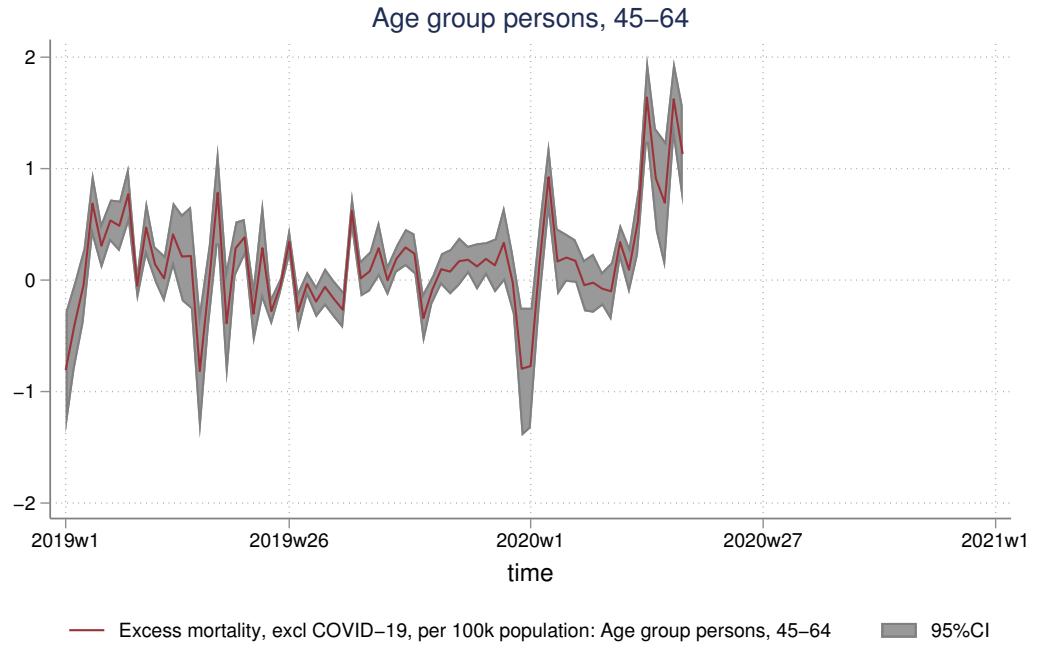

Figure 147: All 45-64 all-cause excess deaths (-COVID19), from 2020 week 1

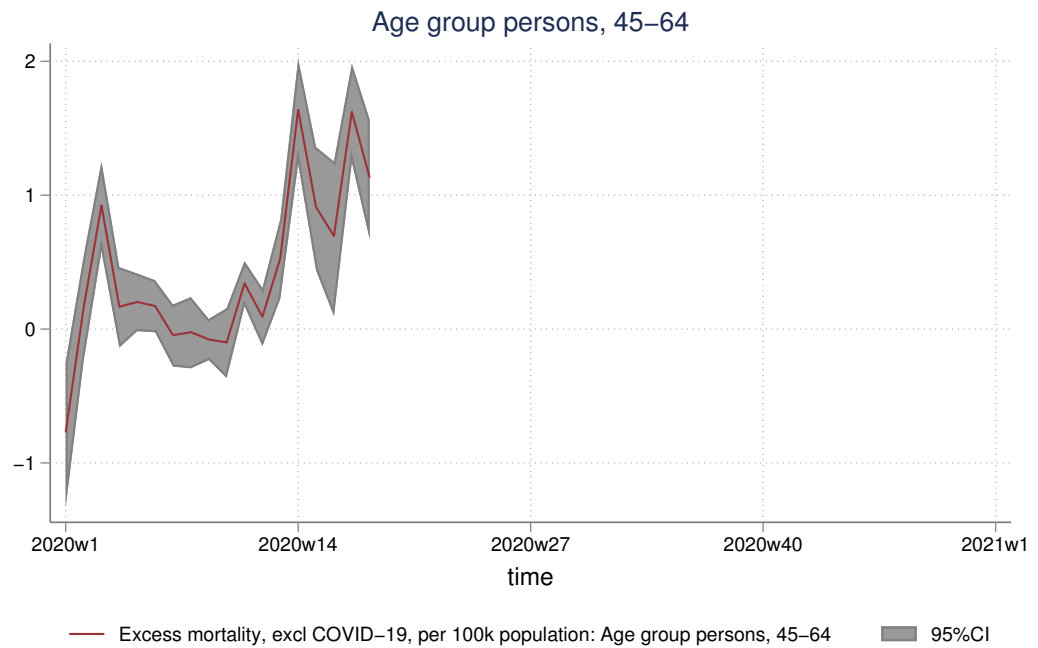

### 3.6 All aged 65-74

Figure 148: All 65-74 mortality time trend and model, from 2010 week 1

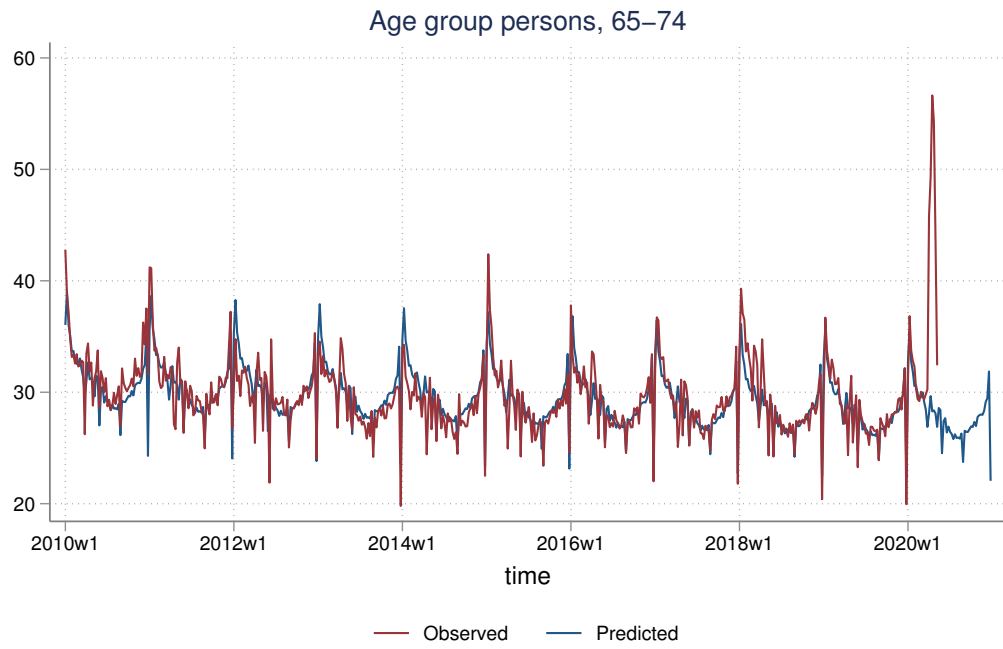

Figure 149: All 65-74 mortality time trend and model, from 2019 week 1

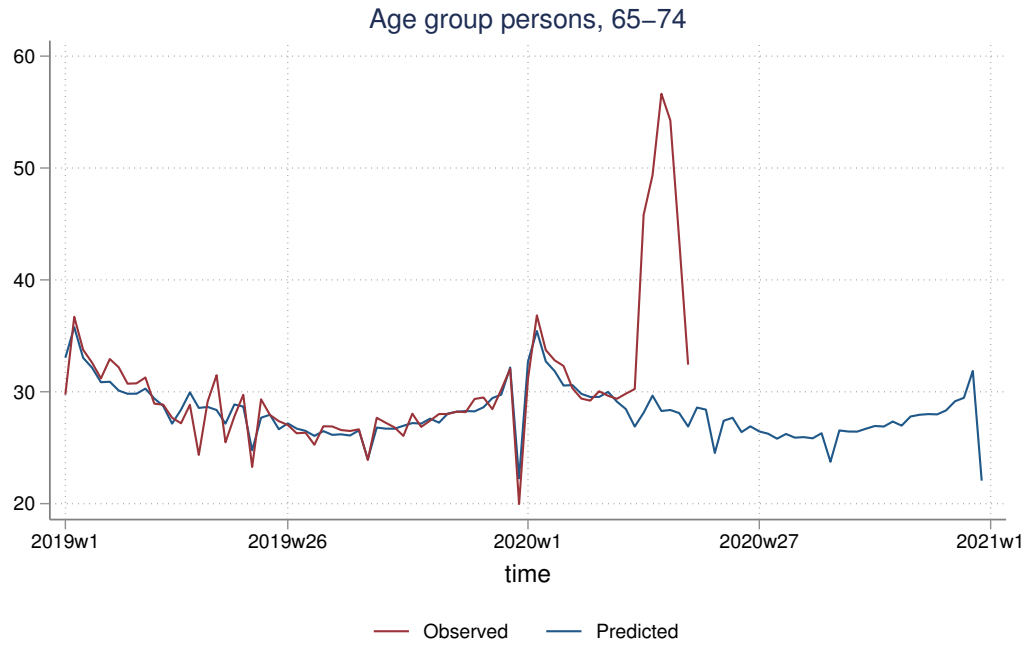

Figure 150: All 65-74 mortality time trend and model, from 2020 week 1

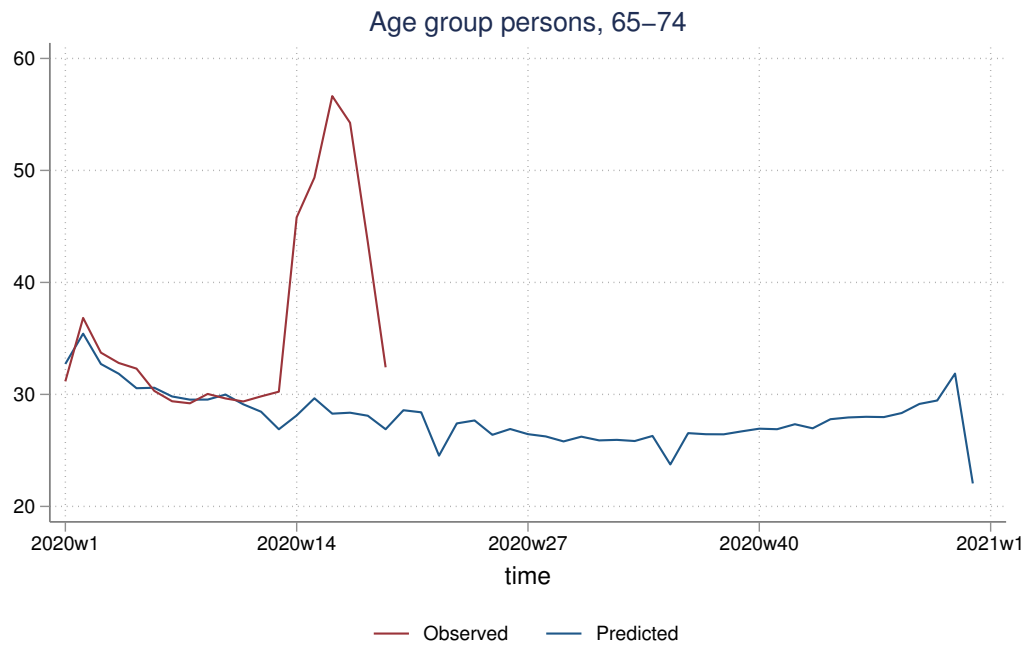

Figure 151: All 65-74 all-cause excess deaths, from 2010 week 1

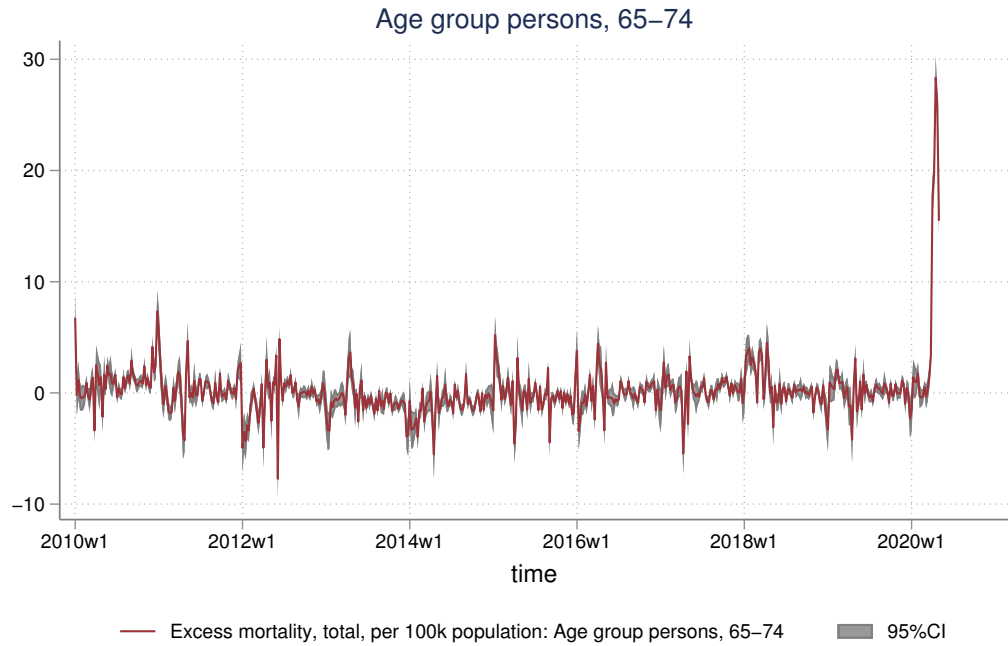

Figure 152: All 65-74 all-cause excess deaths, from 2019 week 1

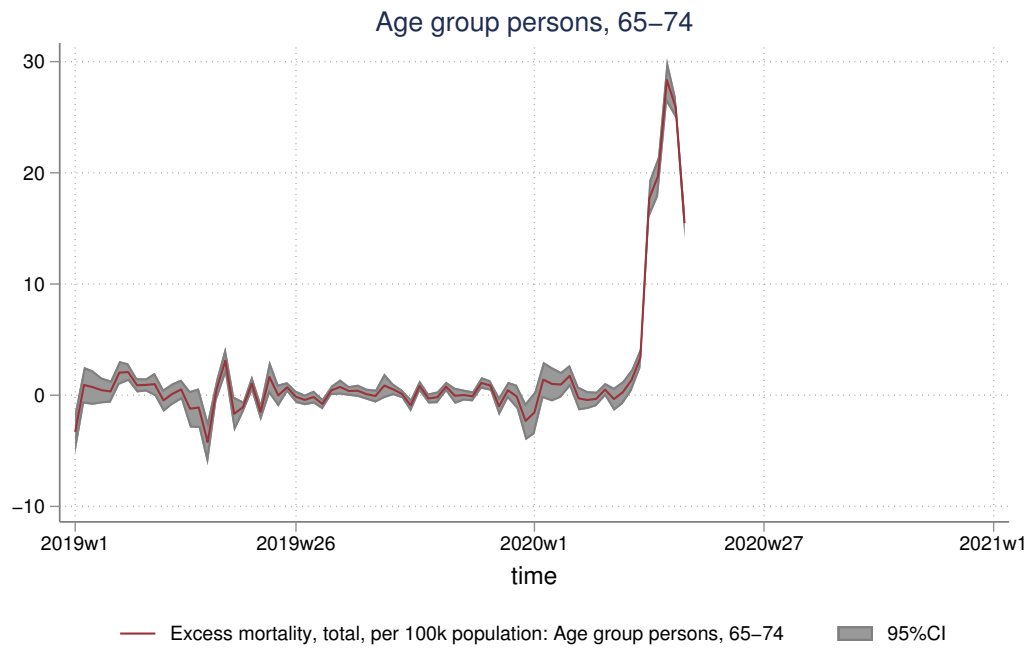

Figure 153: All 65-74 all-cause excess deaths, from 2020 week 1

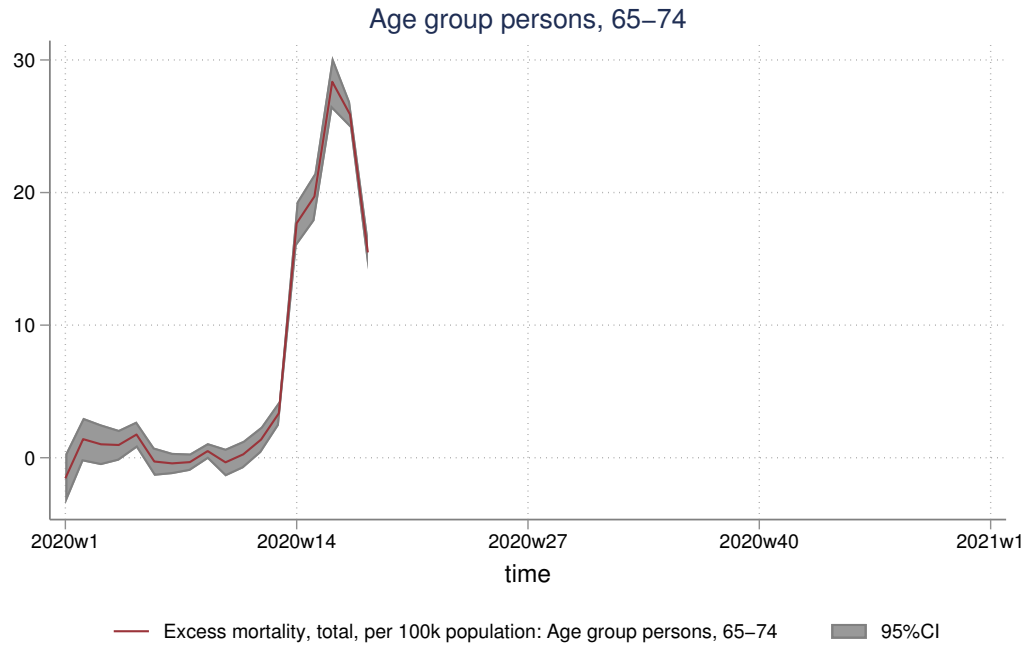

Figure 154: All 65-74 all-cause excess deaths (-COVID19), from 2010 week 1

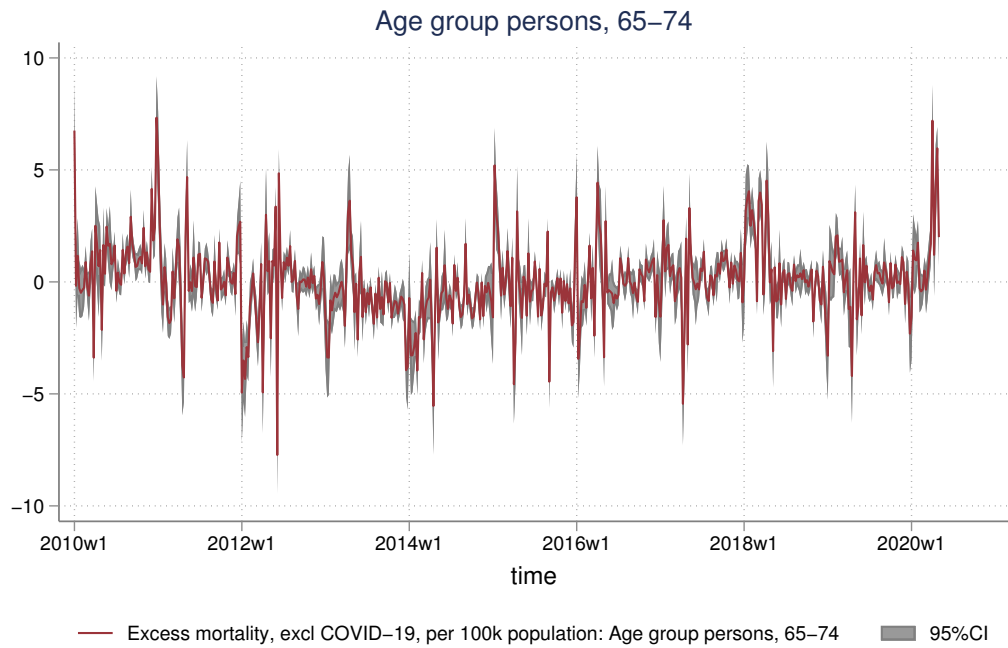

Figure 155: All 65-74 all-cause excess deaths (-COVID19), from 2019 week 1

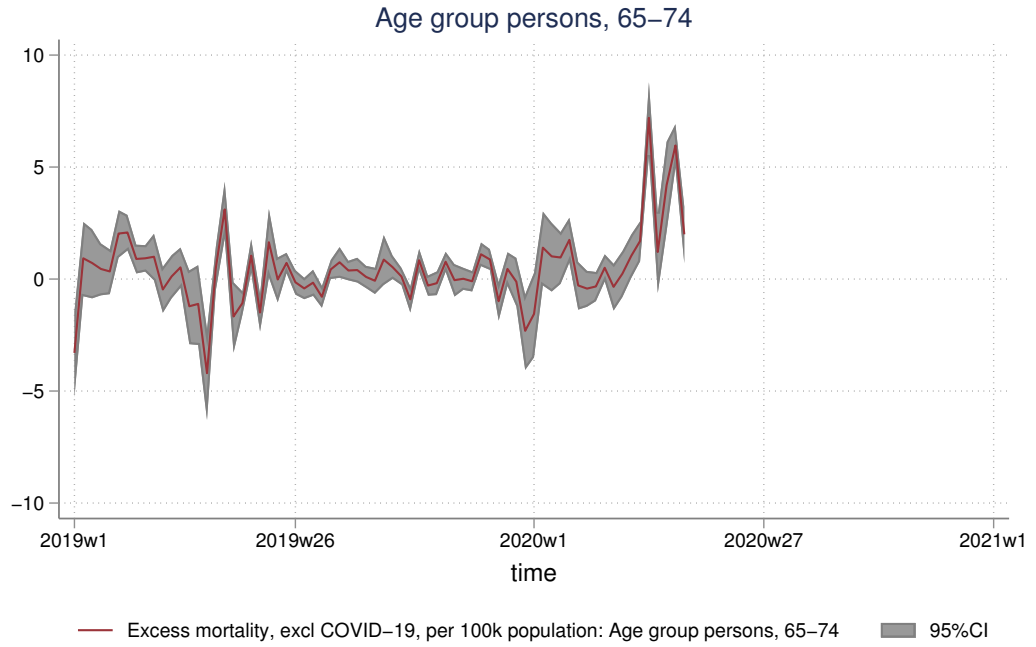

Figure 156: All 65-74 all-cause excess deaths (-COVID19), from 2020 week 1

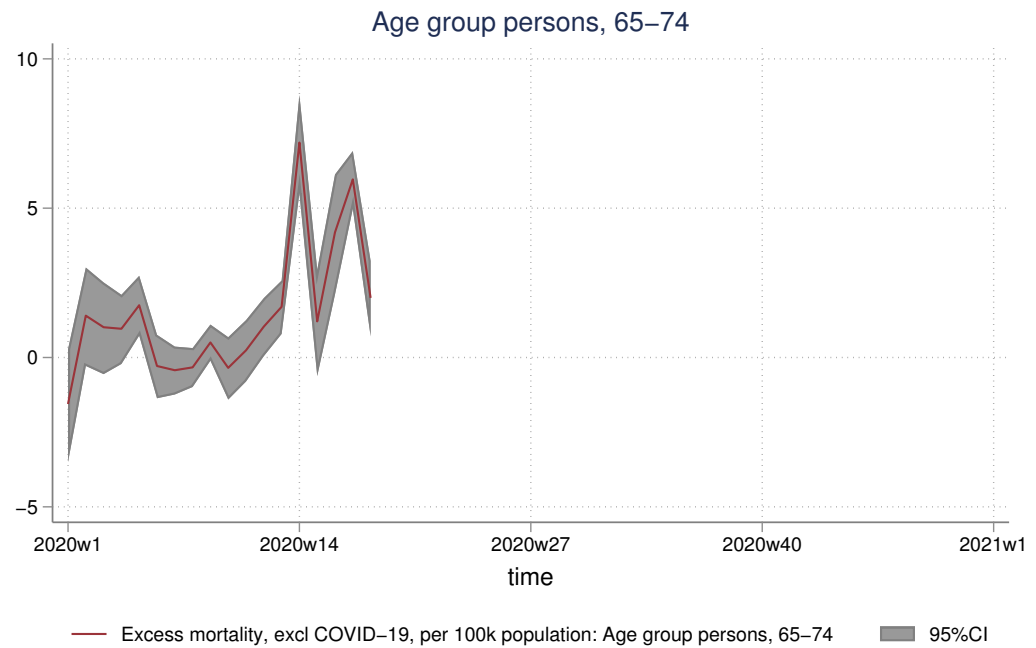

### 3.7 All aged 75-84

Figure 157: All 75-84 mortality time trend and model, from 2010 week 1

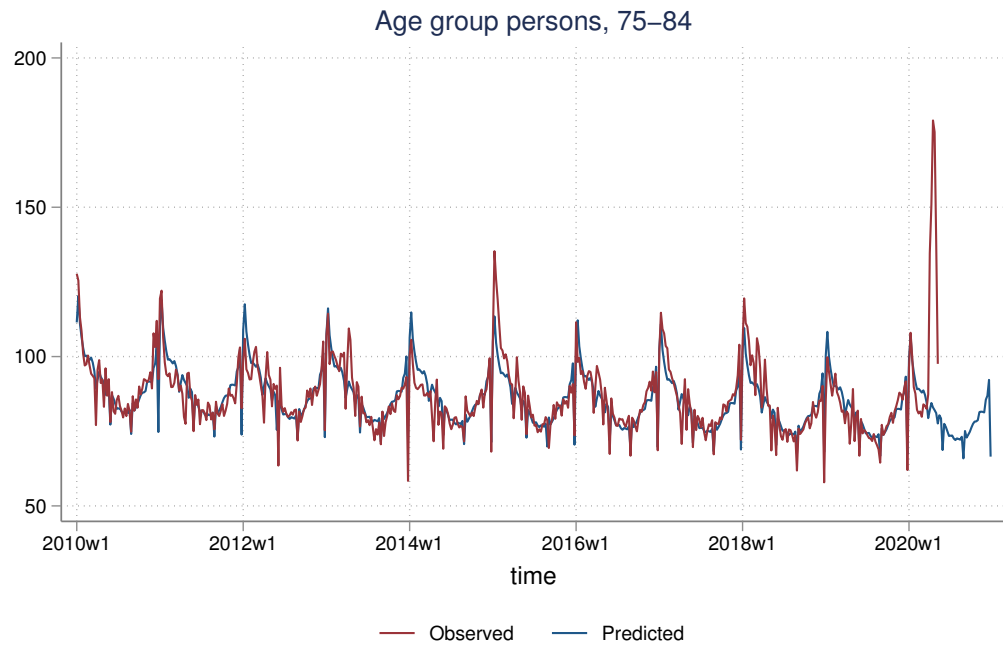



Figure 158: All 75-84 mortality time trend and model, from 2019 week 1

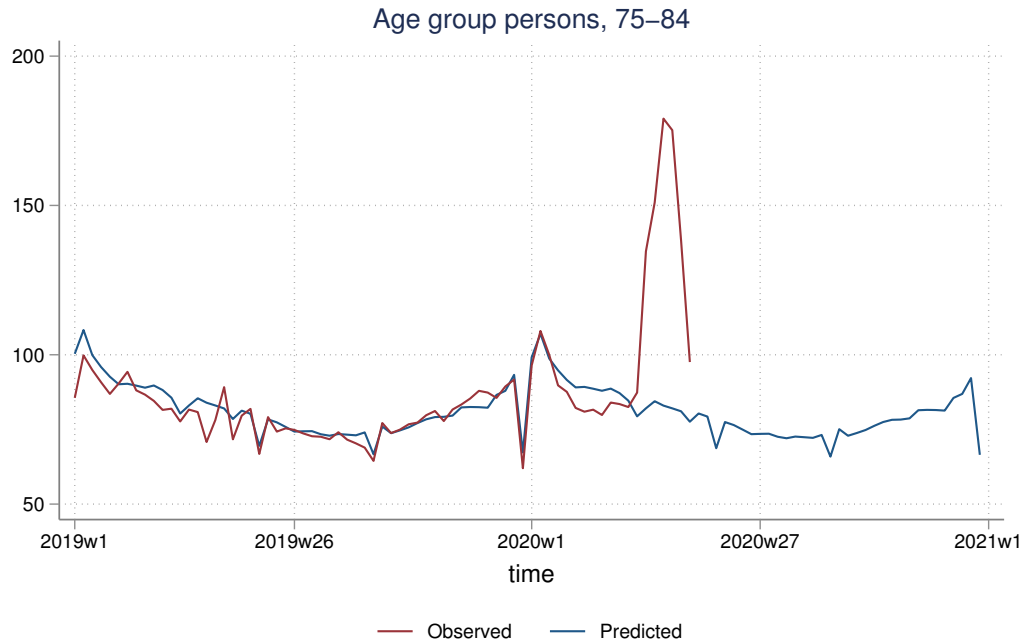

Figure 159: All 75-84 mortality time trend and model, from 2020 week 1

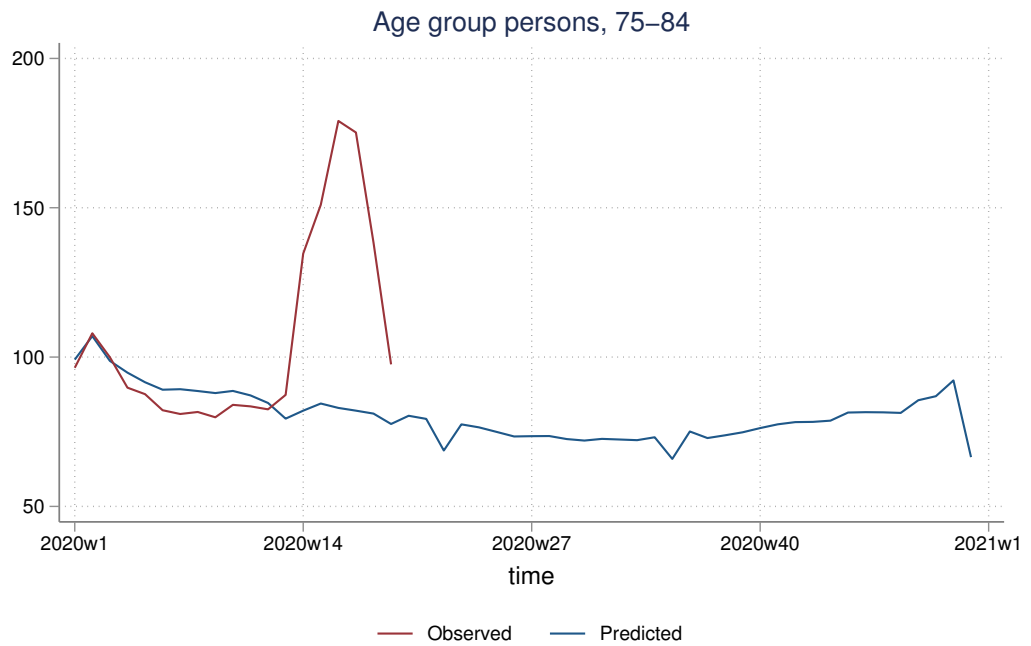

Figure 160: All 75-84 all-cause excess deaths, from 2010 week 1

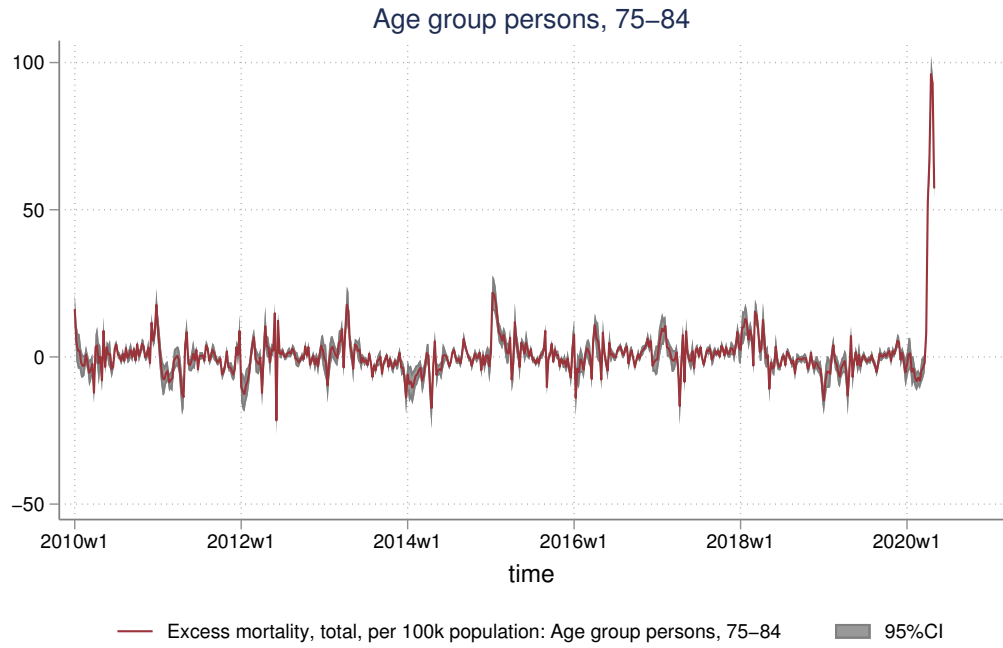

Figure 161: All 75-84 all-cause excess deaths, from 2019 week 1

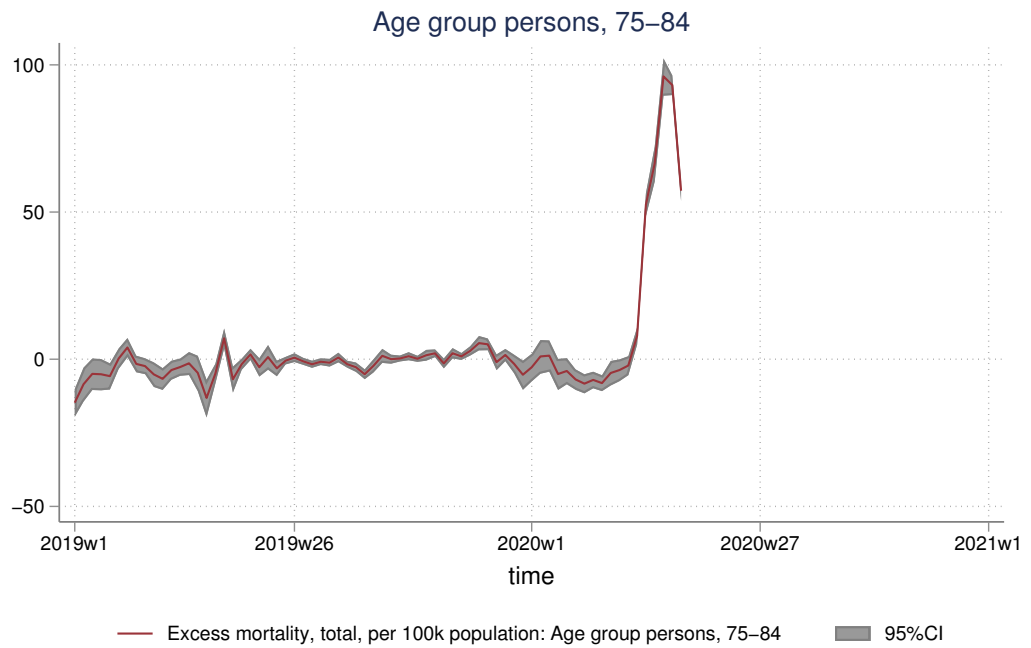

Figure 162: All 75-84 all-cause excess deaths, from 2020 week 1

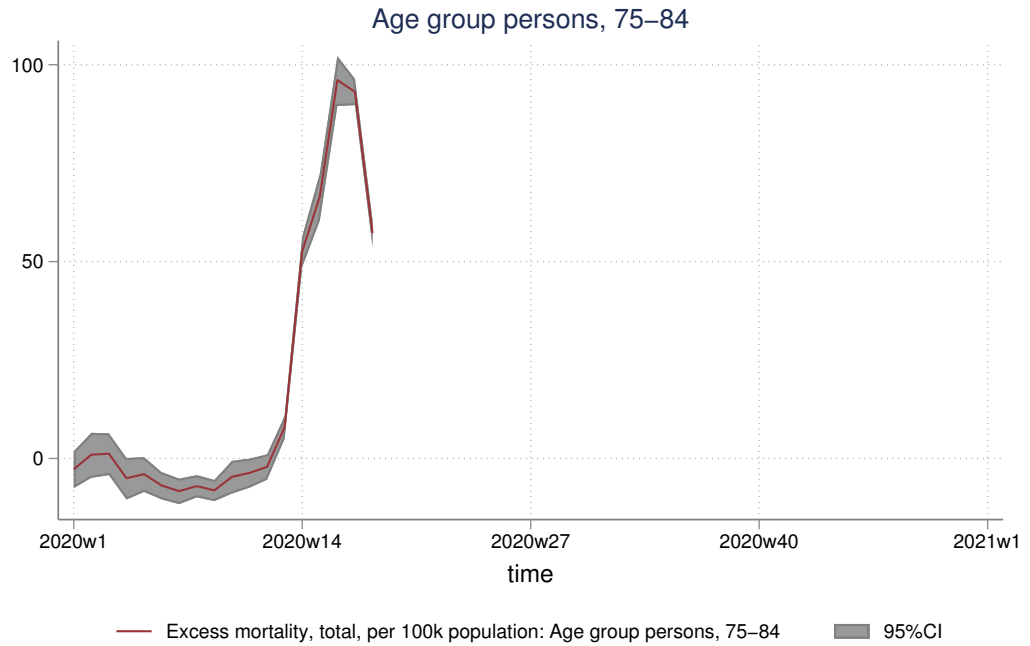

Figure 163: All 75-84 all-cause excess deaths (-COVID19), from 2010 week 1

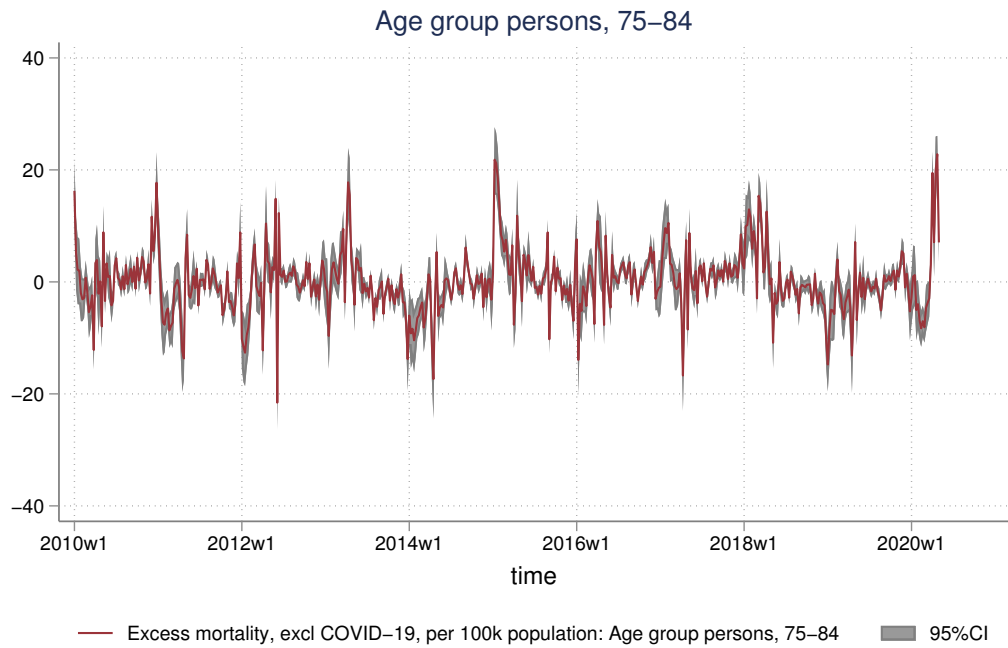

Figure 164: All 75-84 all-cause excess deaths (-COVID19), from 2019 week 1

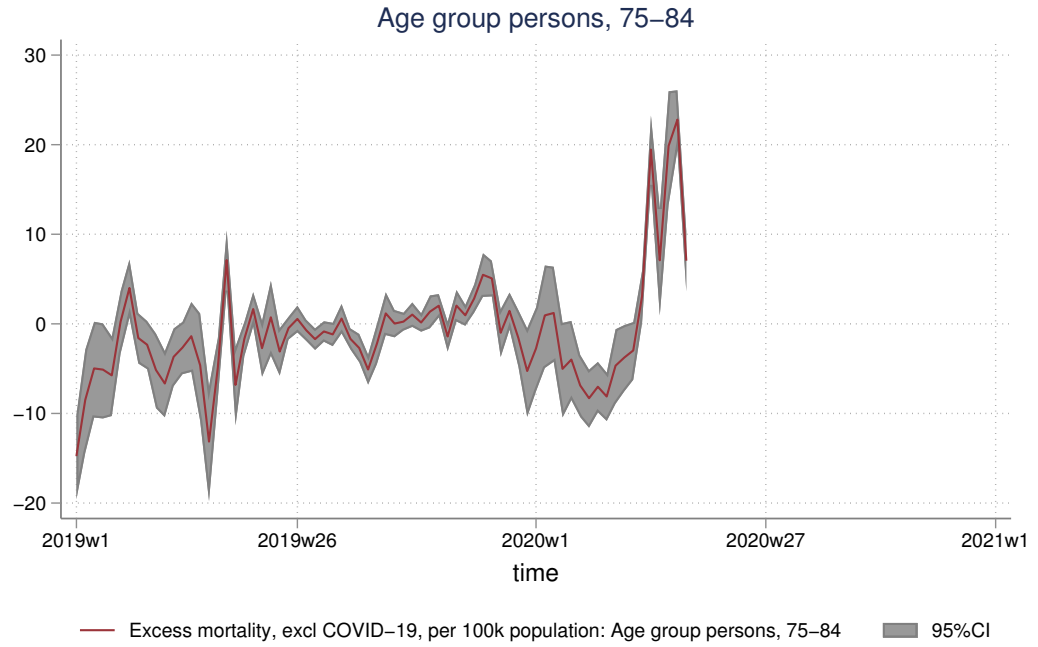

Figure 165: All 75-84 all-cause excess deaths (-COVID19), from 2020 week 1

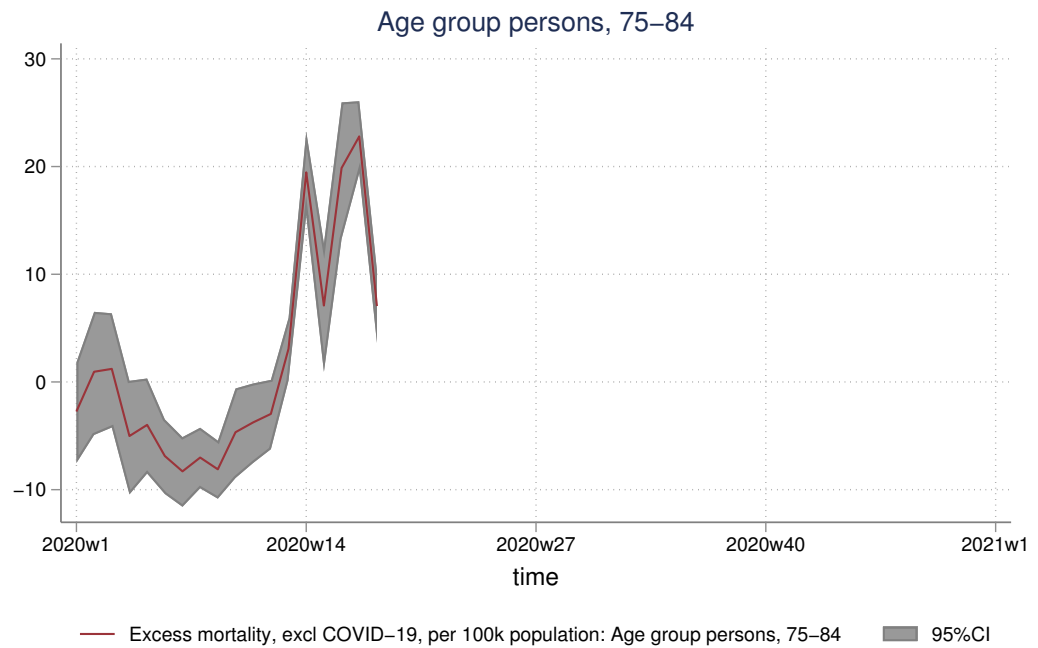

### 3.8 All aged 85+

Figure 166: All 85+ mortality time trend and model, from 2010 week 1

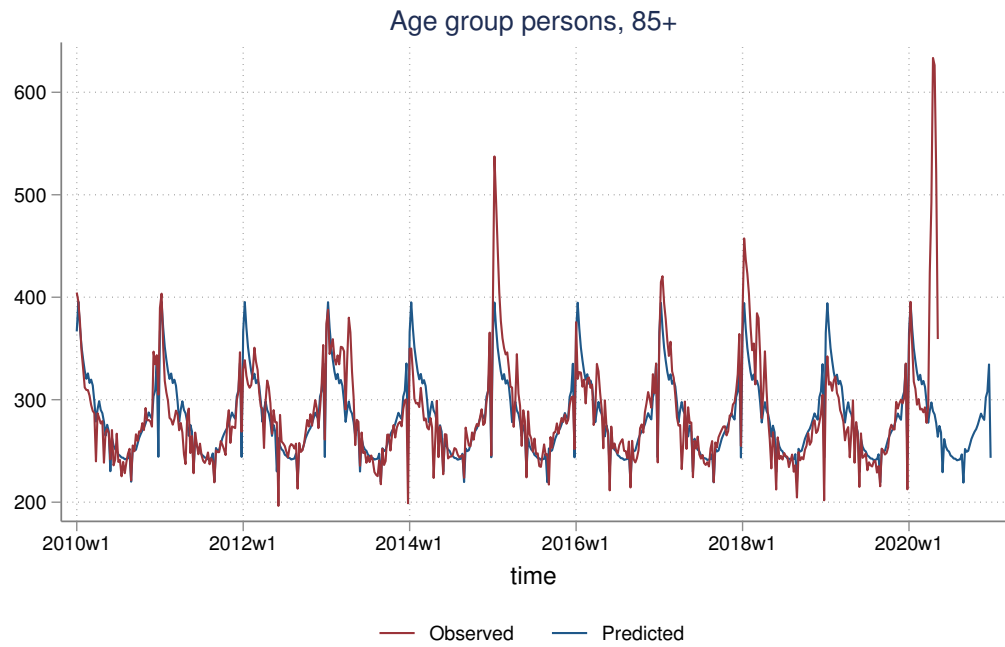

Figure 167: All 85+ mortality time trend and model, from 2019 week 1

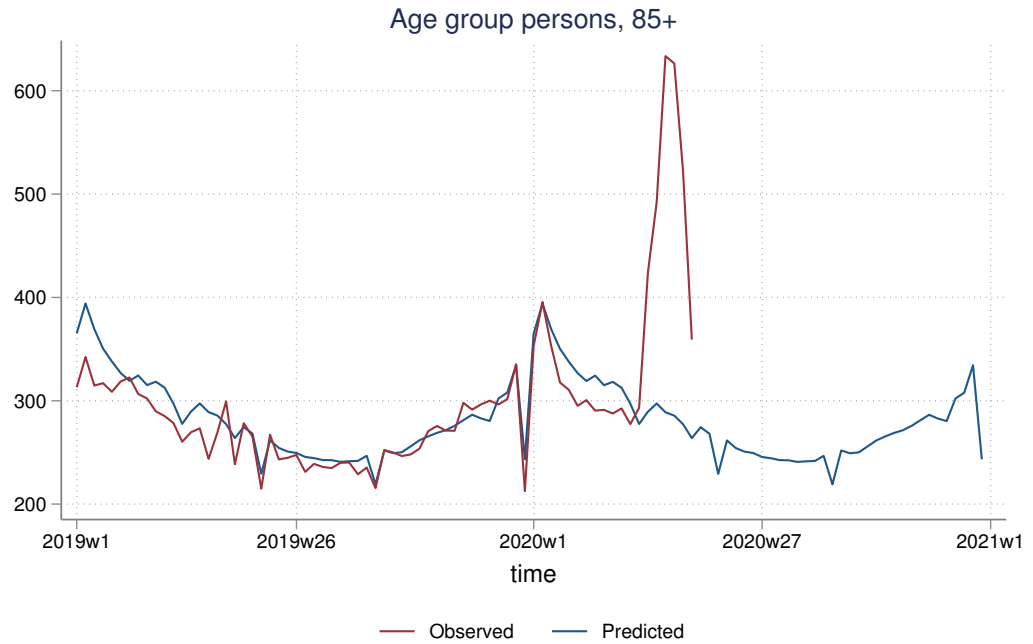

Figure 168: All 85+ mortality time trend and model, from 2020 week 1

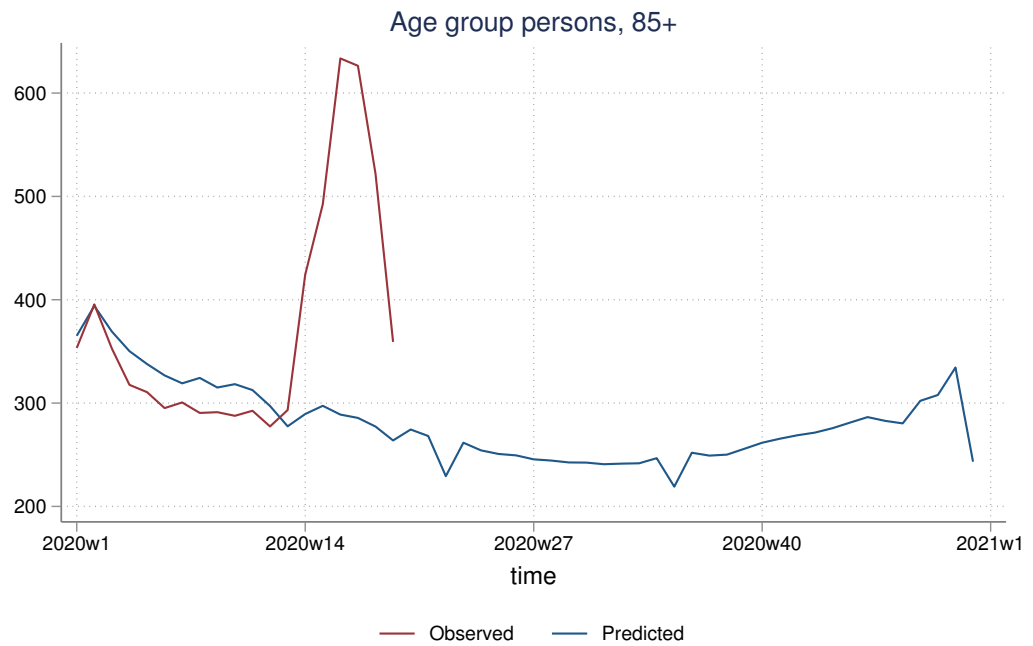

Figure 169: All 85+ all-cause excess deaths, from 2010 week 1

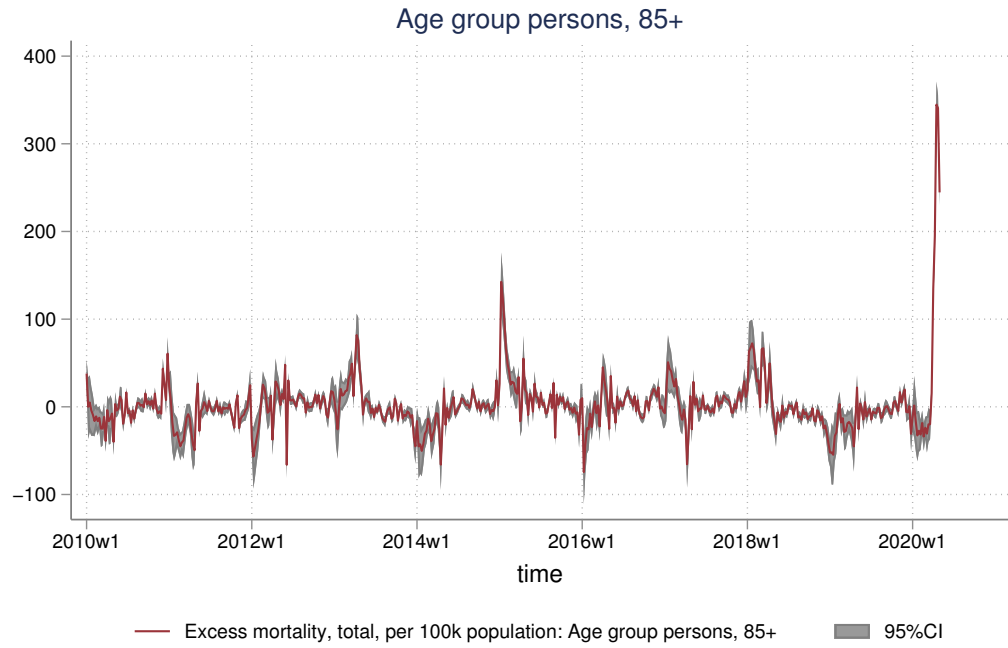

Figure 170: All 85+ all-cause excess deaths, from 2019 week 1

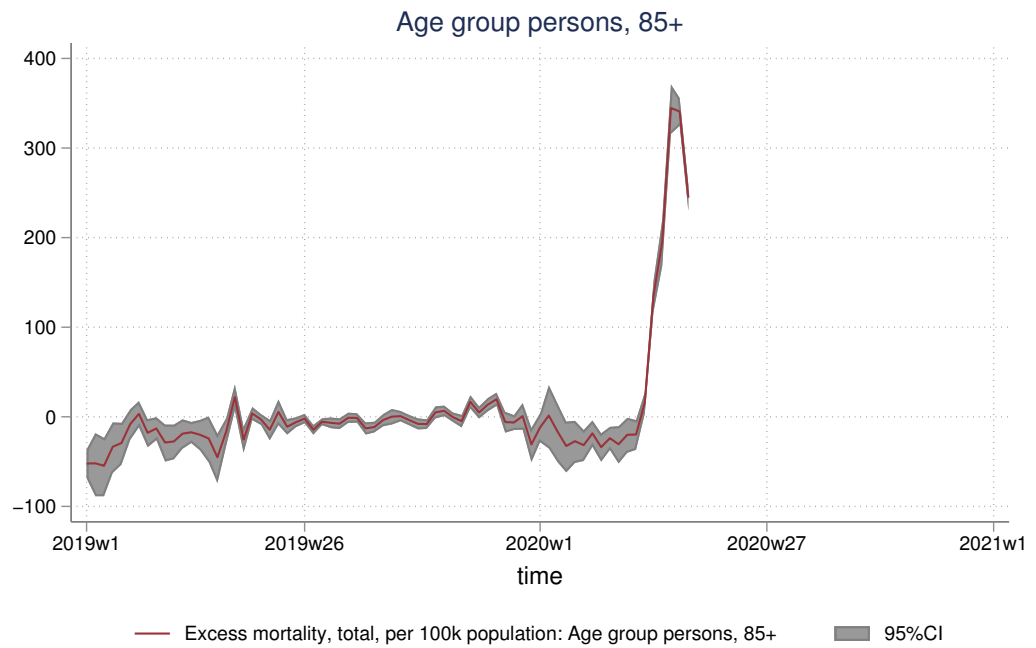

Figure 171: All 85+ all-cause excess deaths, from 2020 week 1

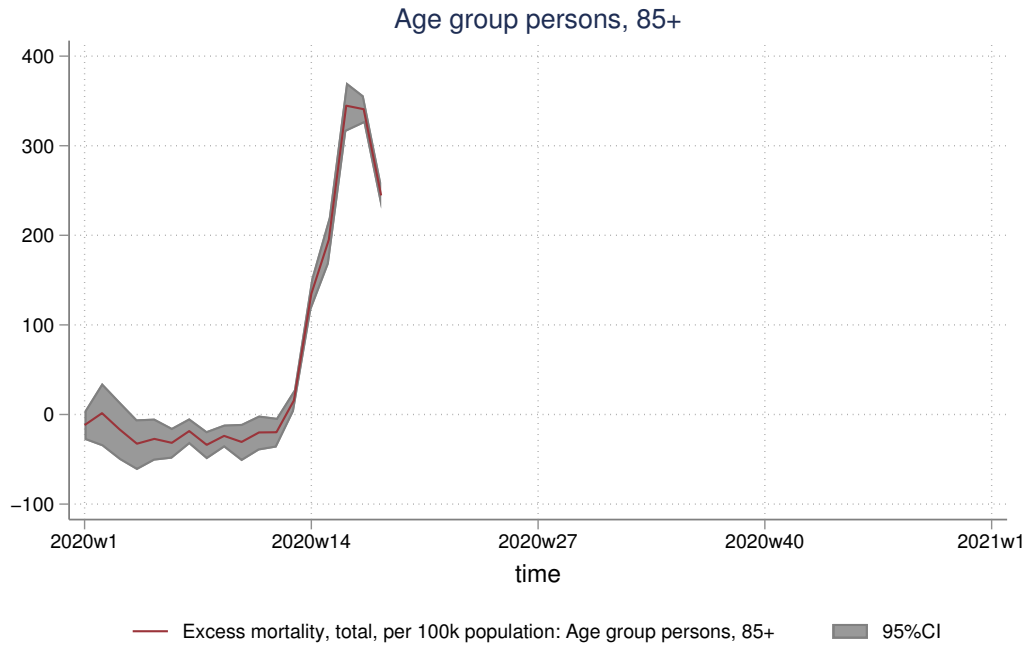

Figure 172: All 85+ all-cause excess deaths (-COVID19), from 2010 week 1

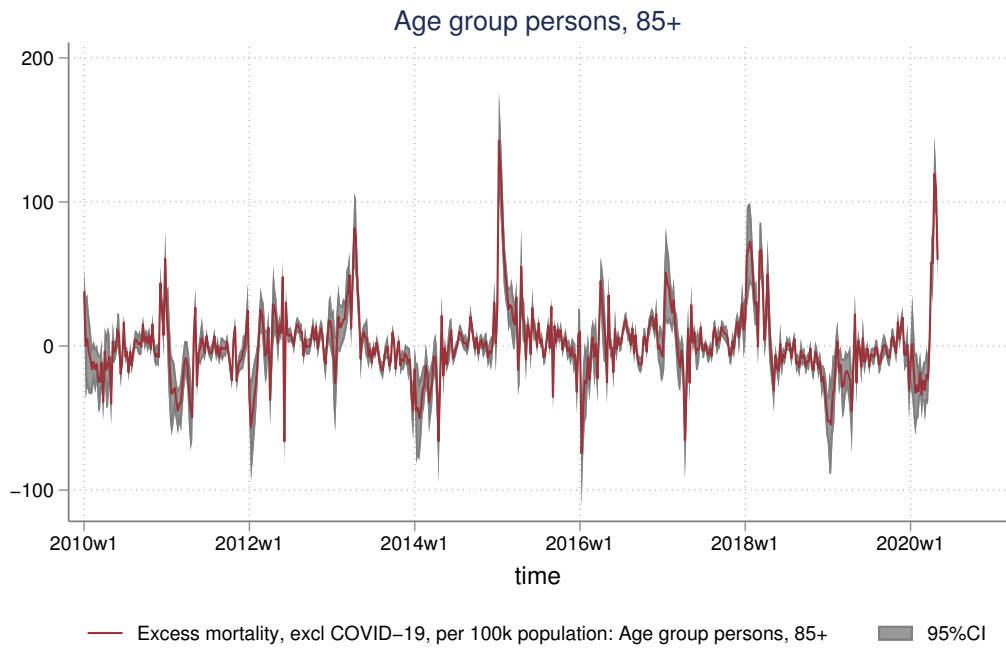



Figure 173: All 85+ all-cause excess deaths (-COVID19), from 2019 week 1

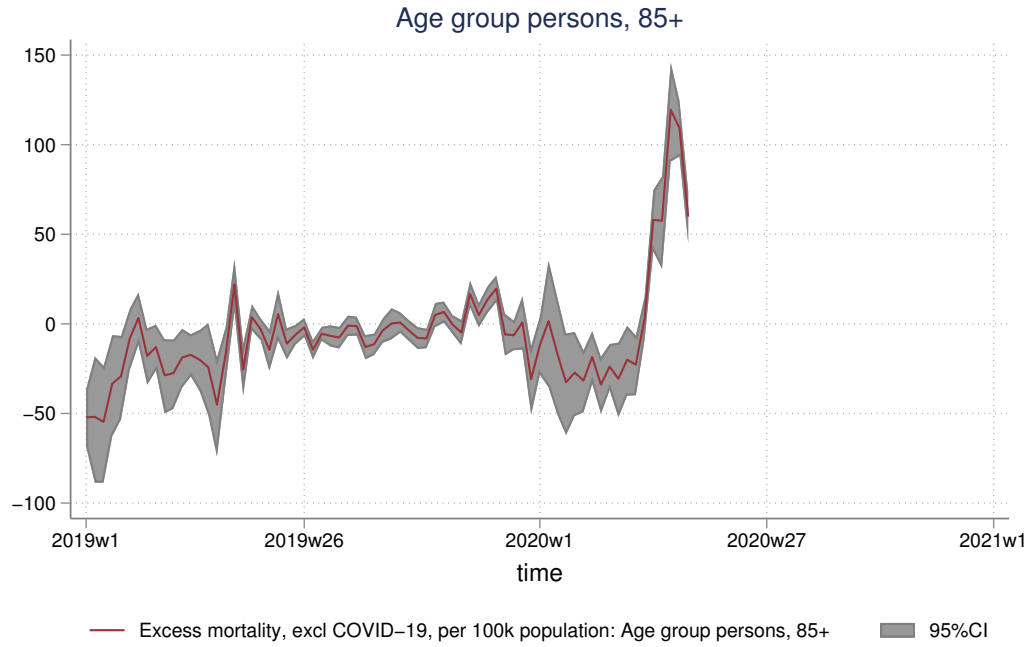

Figure 174: All 85+ all-cause excess deaths (-COVID19), from 2020 week 1

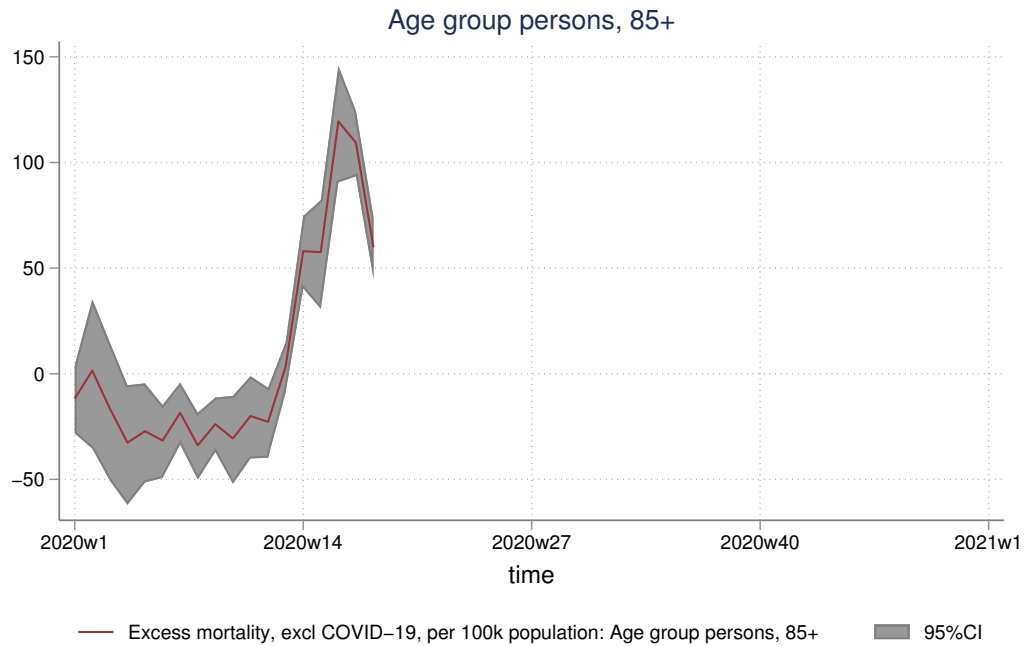

## 4 Age groups, per 100k males

### 4.1 Time trends

Figure 175: Male age group mortality time trends, from 2010 wk1

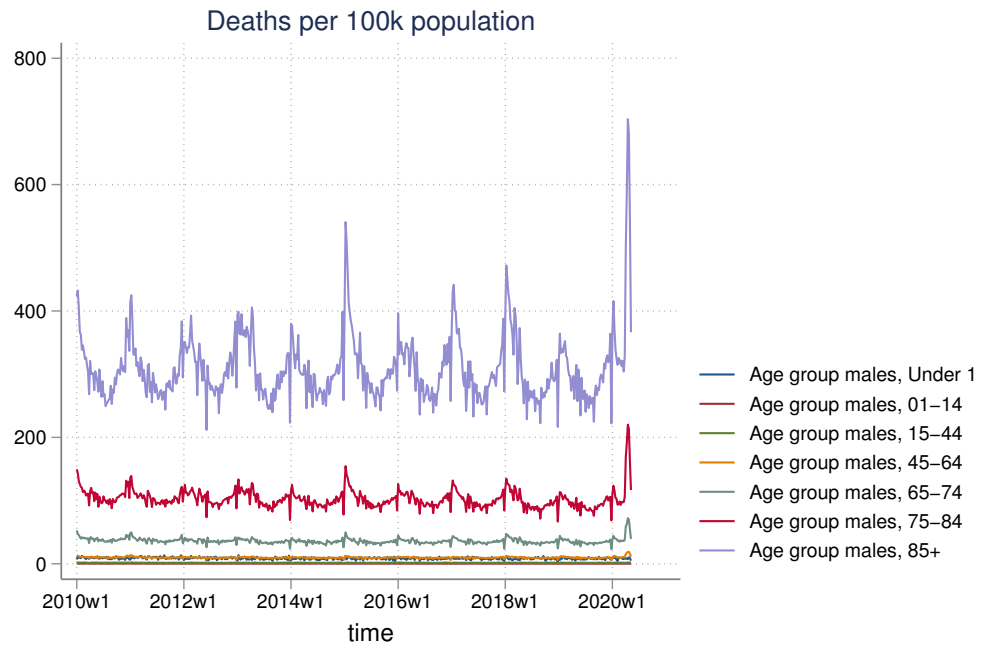

Figure 176: Male age group mortality time trends, from 2019 wk1

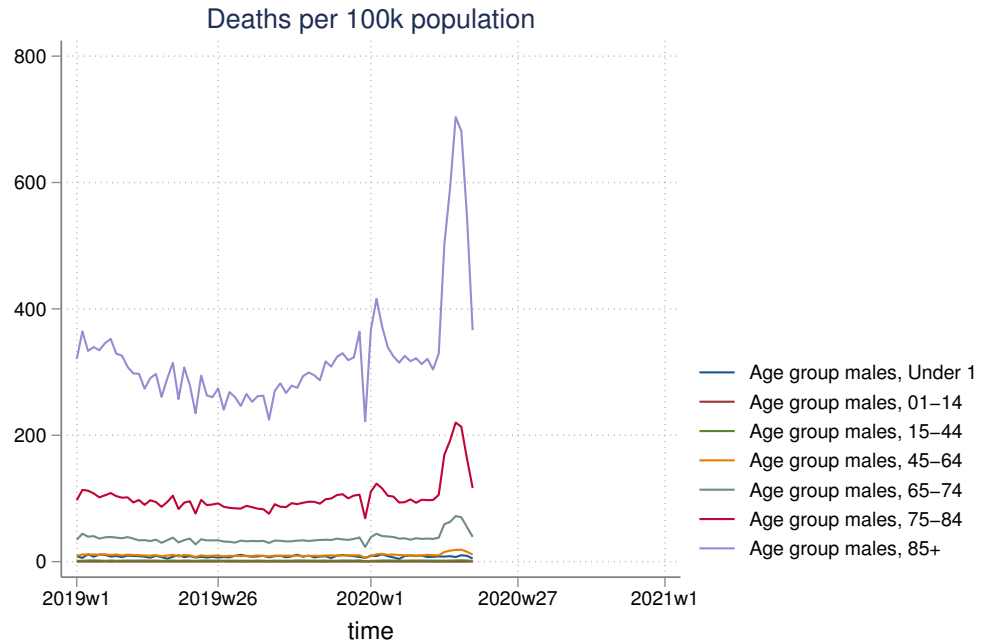

Figure 177: Male age group mortality time trends, from 2020 wk1

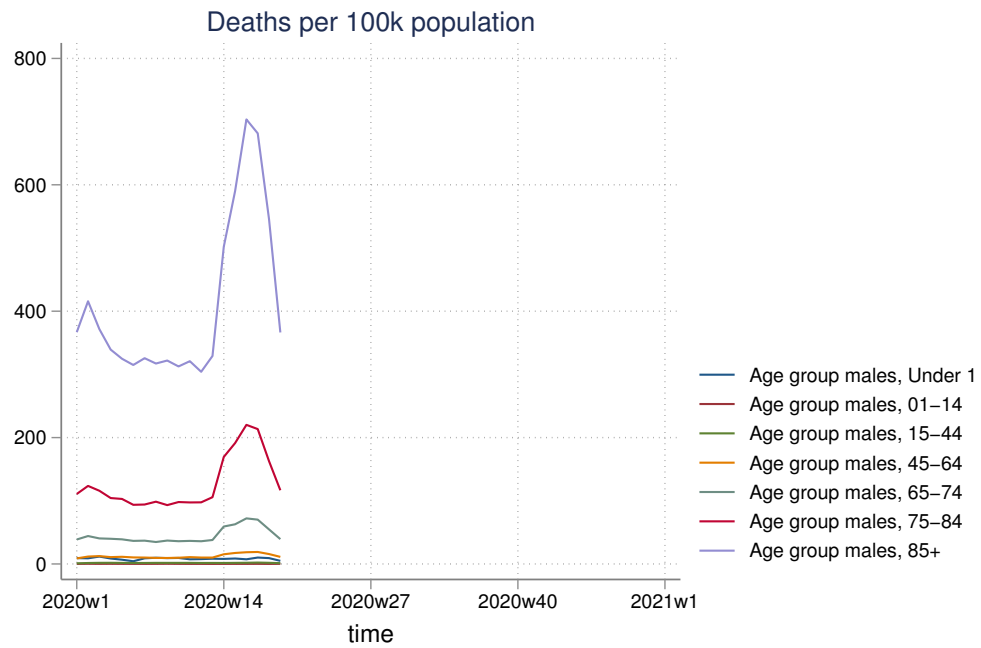

## 4.2 Males aged under 1

Figure 178: Males < 1 mortality time trend and model, from 2010 wk1

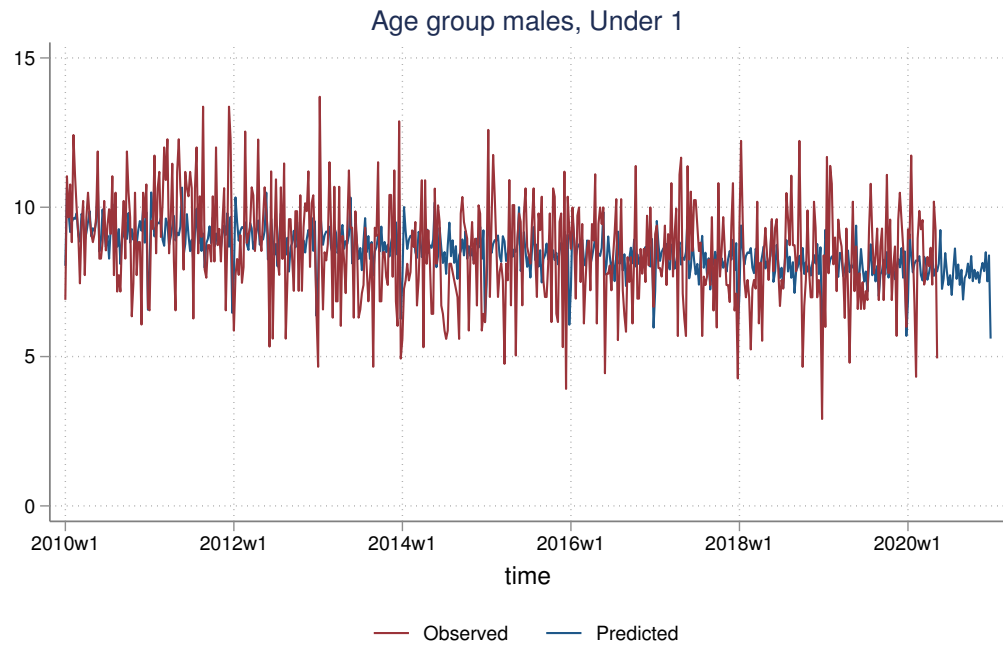

Figure 179: Males < 1 mortality time trend and model, from 2019 wk1

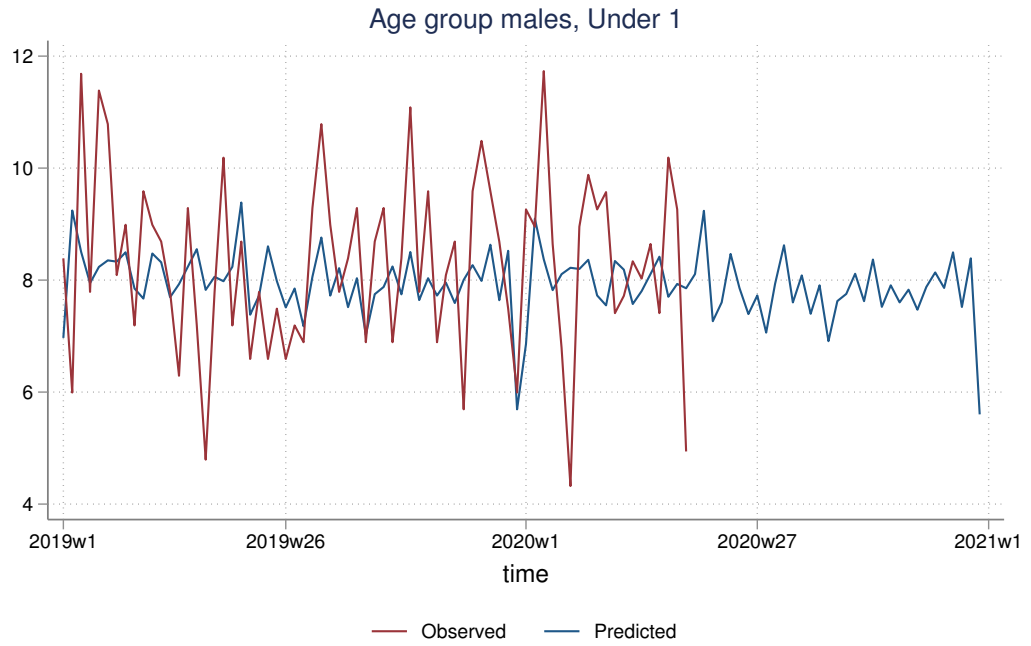

Figure 180: Males < 1 mortality time trend and model, from 2020 wk1

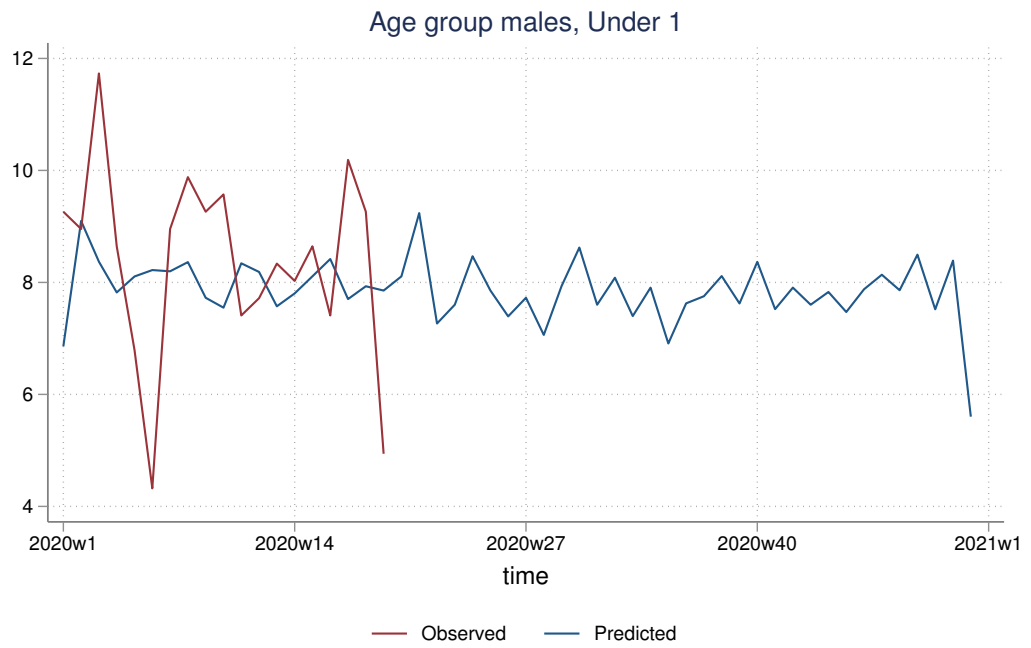

Figure 181: Males < 1 all-cause excess deaths, from 2010 wk1

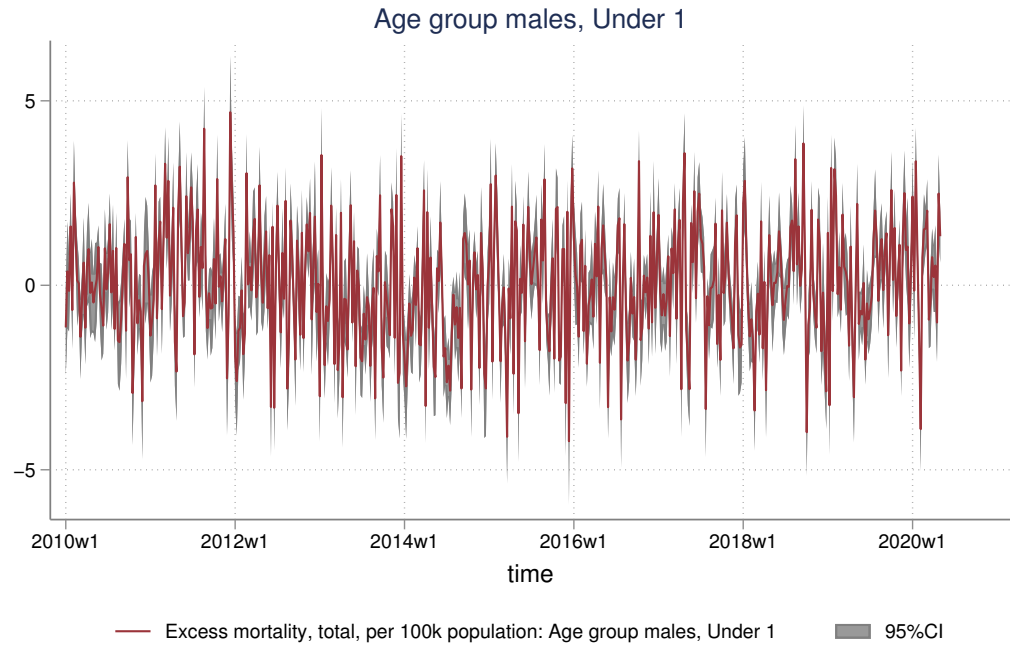

Figure 182: Males < 1 all-cause excess deaths, from 2019 wk1

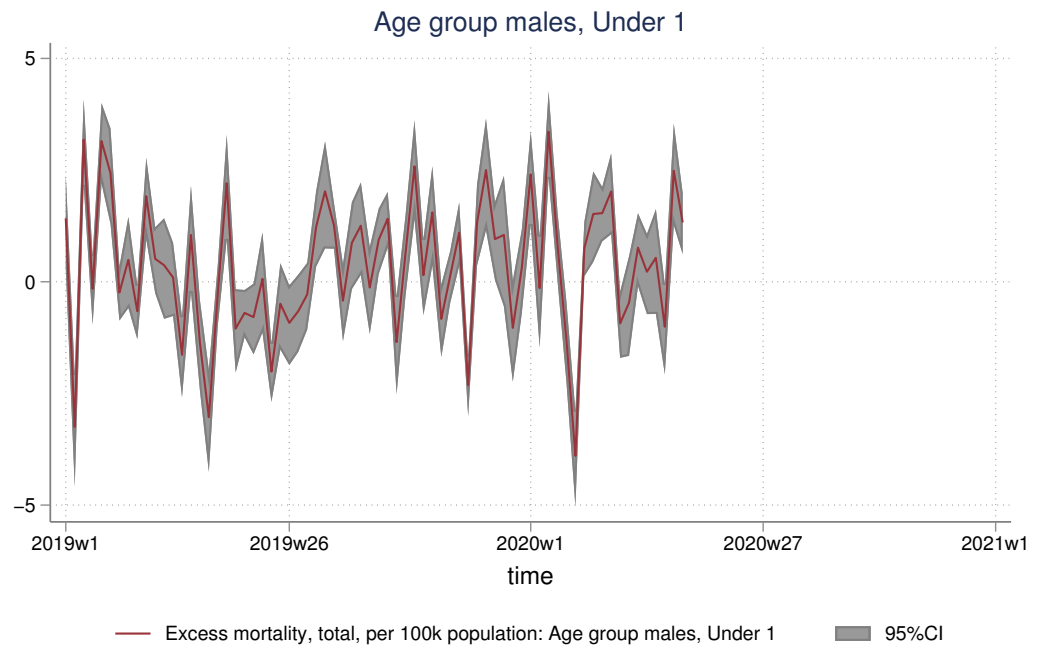

Figure 183: Males < 1 all-cause excess deaths, from 2020 wk1

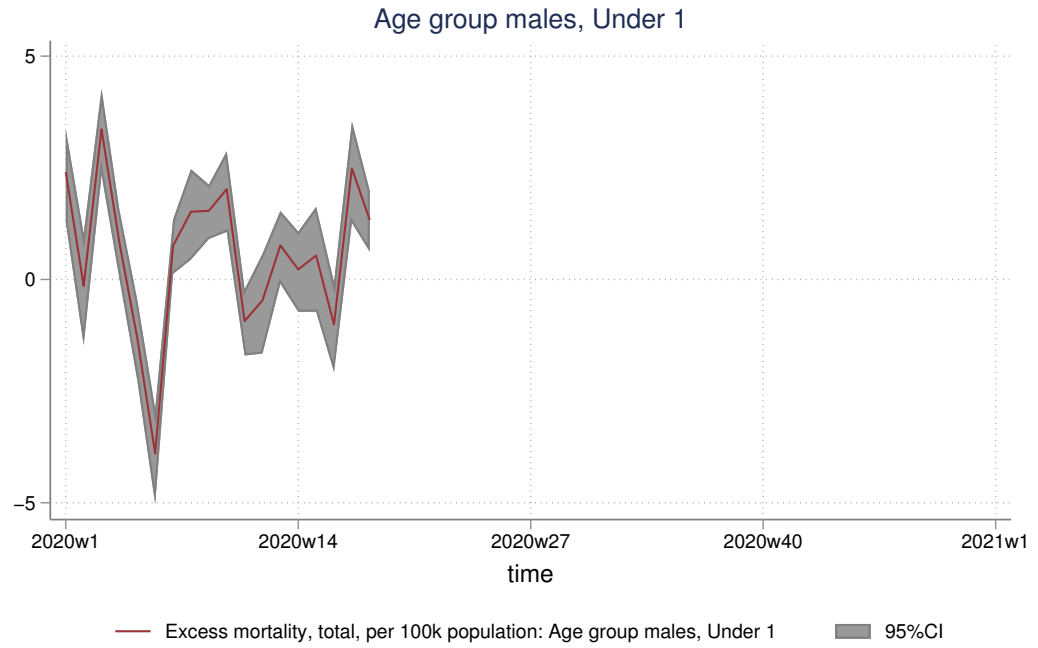

Figure 184: Males < 1 all-cause excess deaths minus COVID19, from 2010 wk1

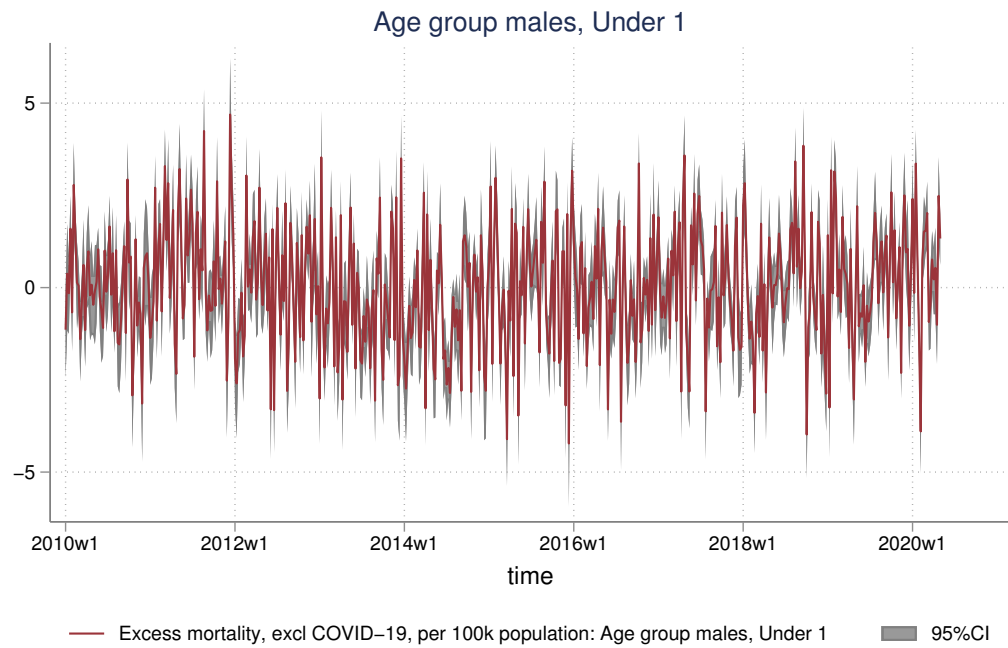

Figure 185: Males < 1 all-cause excess deaths minus COVID19, from 2019 wk1

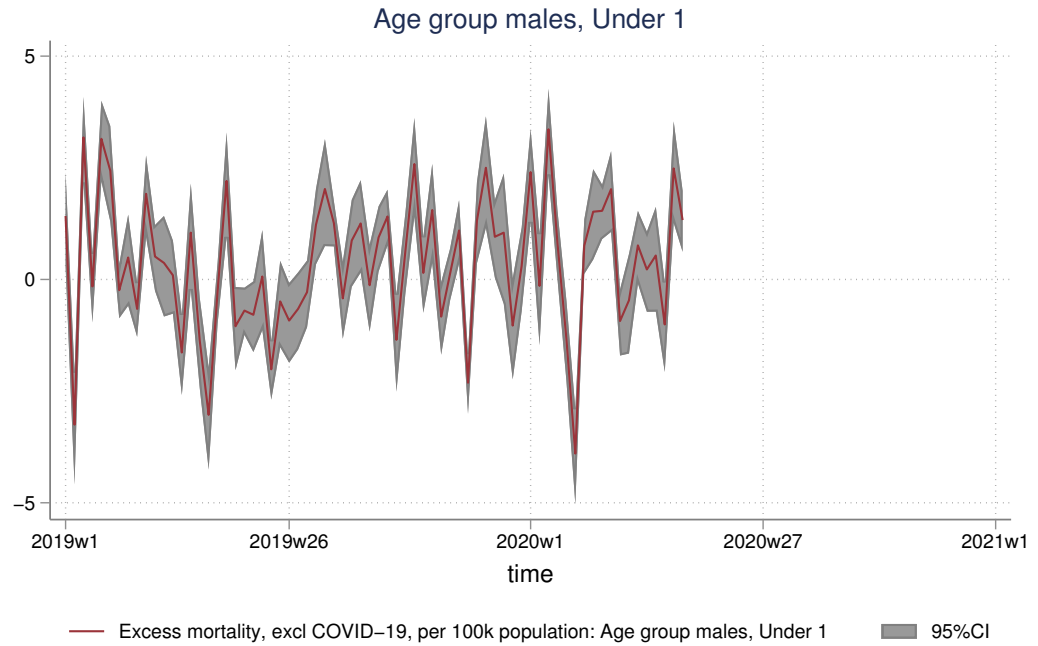

Figure 186: Males < 1 all-cause excess deaths minus COVID19, from 2020 wk1

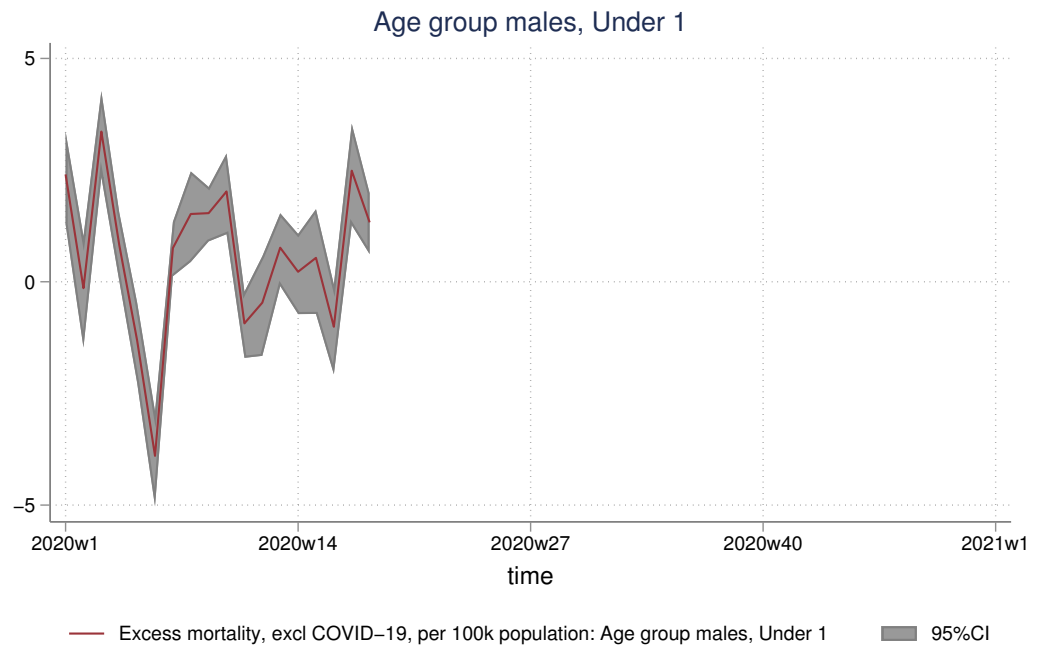



### 4.3 Males aged 01-14

Figure 187: Males 01-14 mortality time trend and model, from 2010 wk1

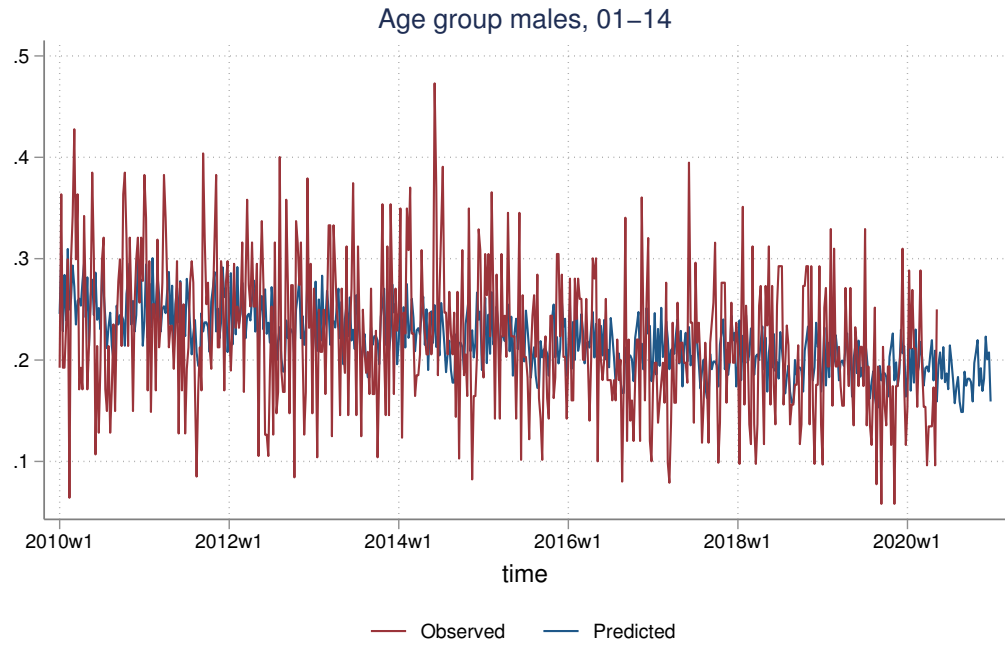

Figure 188: Males 01-14 mortality time trend and model, from 2019 wk1

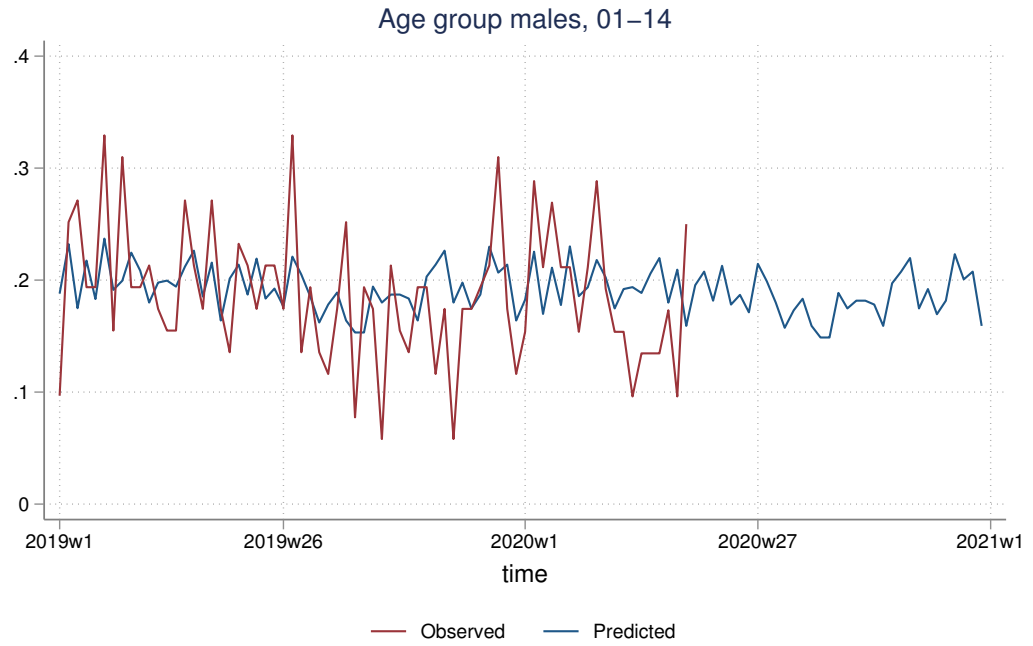

Figure 189: Males 01-14 mortality time trend and model, from 2020 wk1

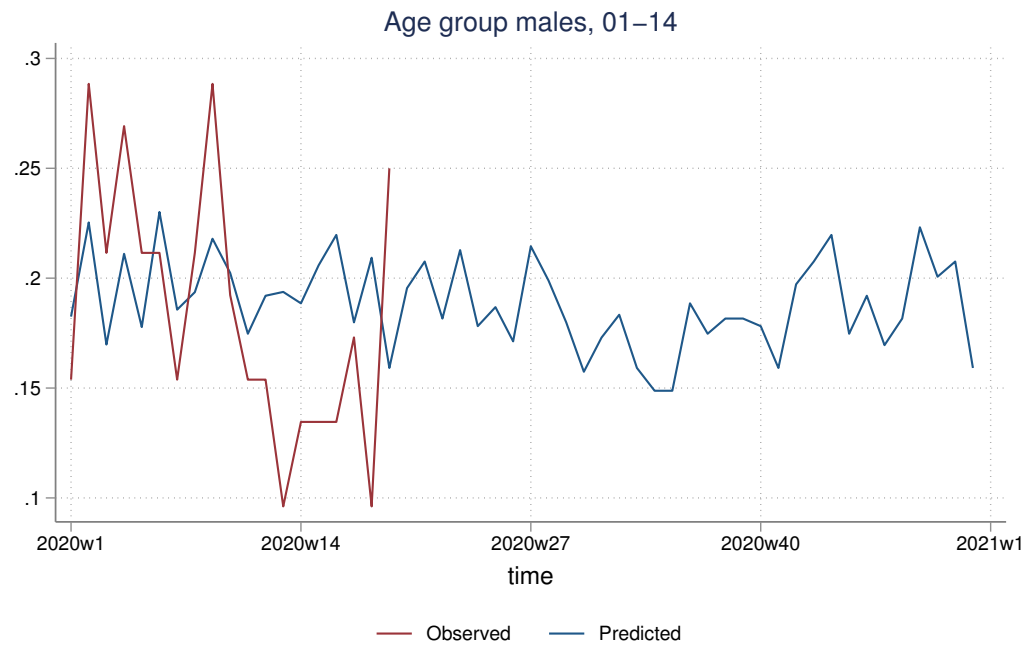

Figure 190: Males 01-14 all-cause excess deaths, from 2010 wk1

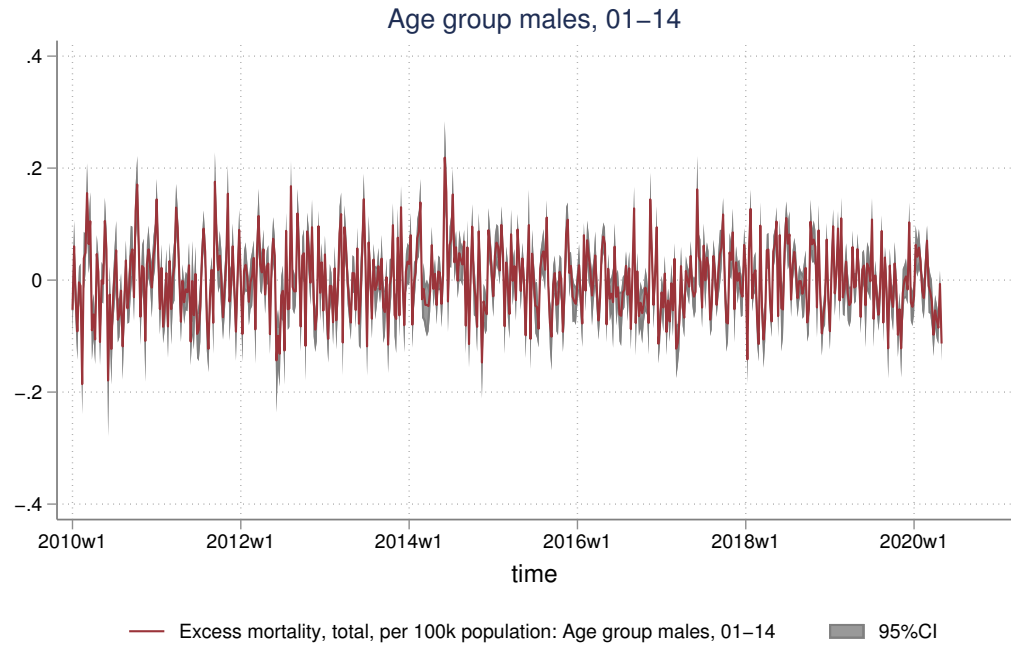

Figure 191: Males 01-14 all-cause excess deaths, from 2019 wk1

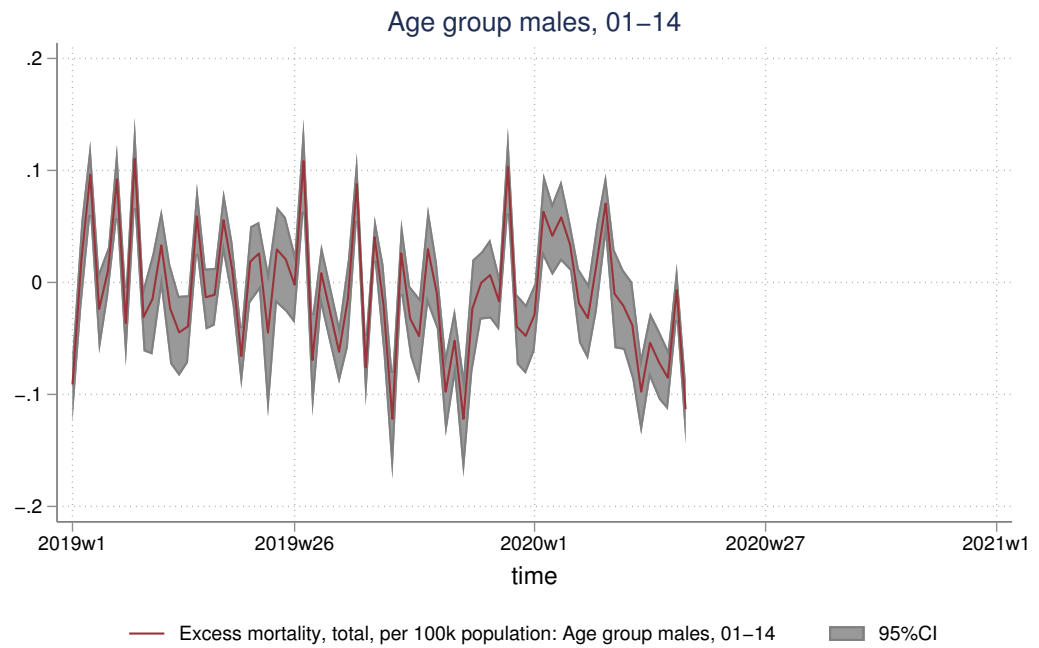

Figure 192: Males 01-14 all-cause excess deaths, from 2020 wk1

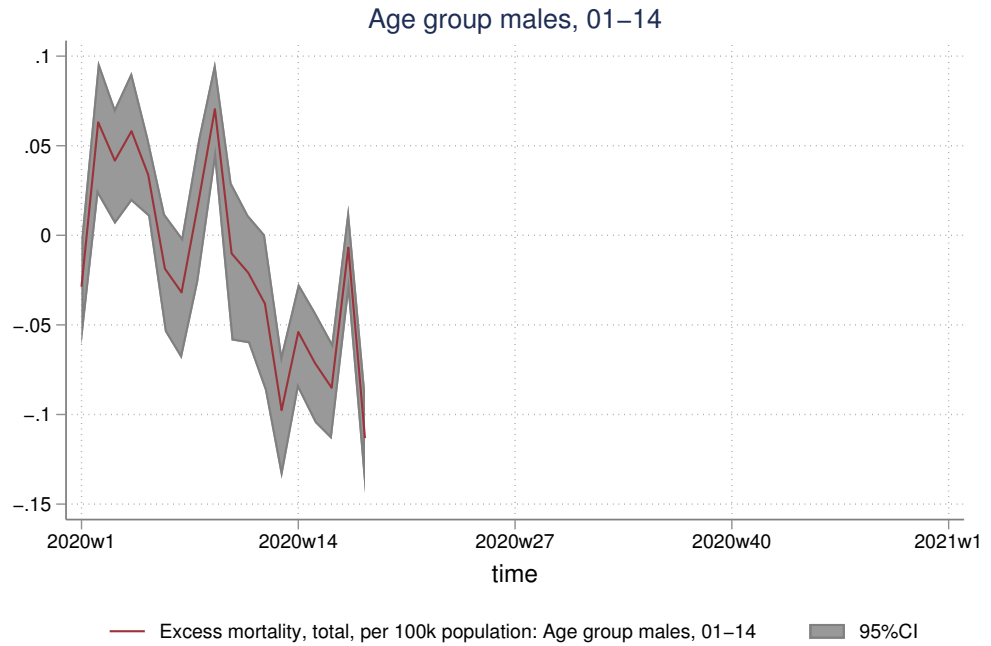

Figure 193: Males 01-14 all-cause excess deaths (-COVID19), from 2010 wk1

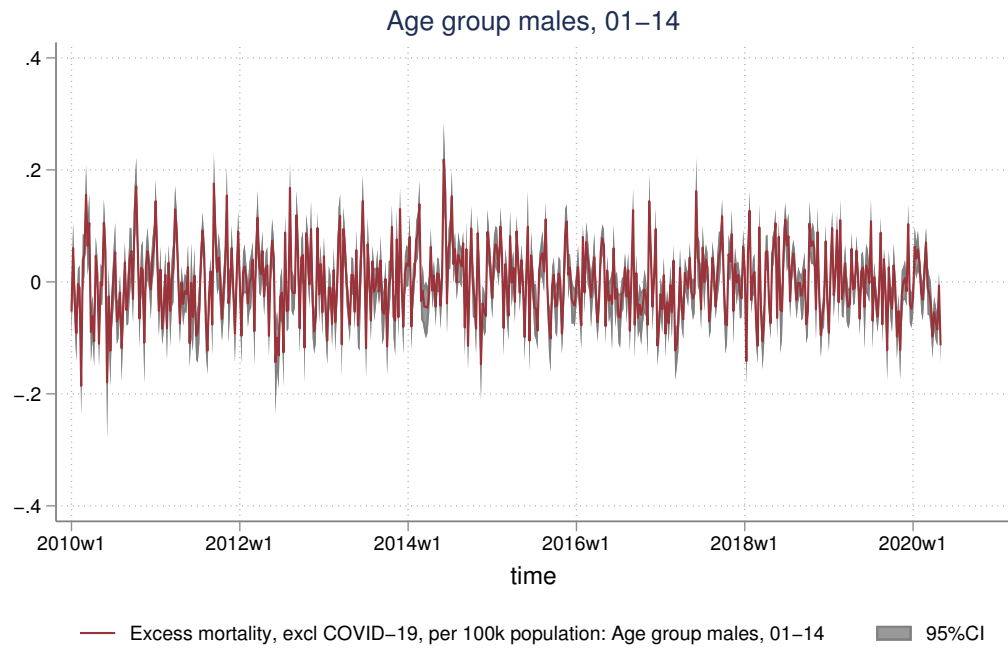

Figure 194: Males 01-14 all-cause excess deaths (-COVID19), from 2019 wk1

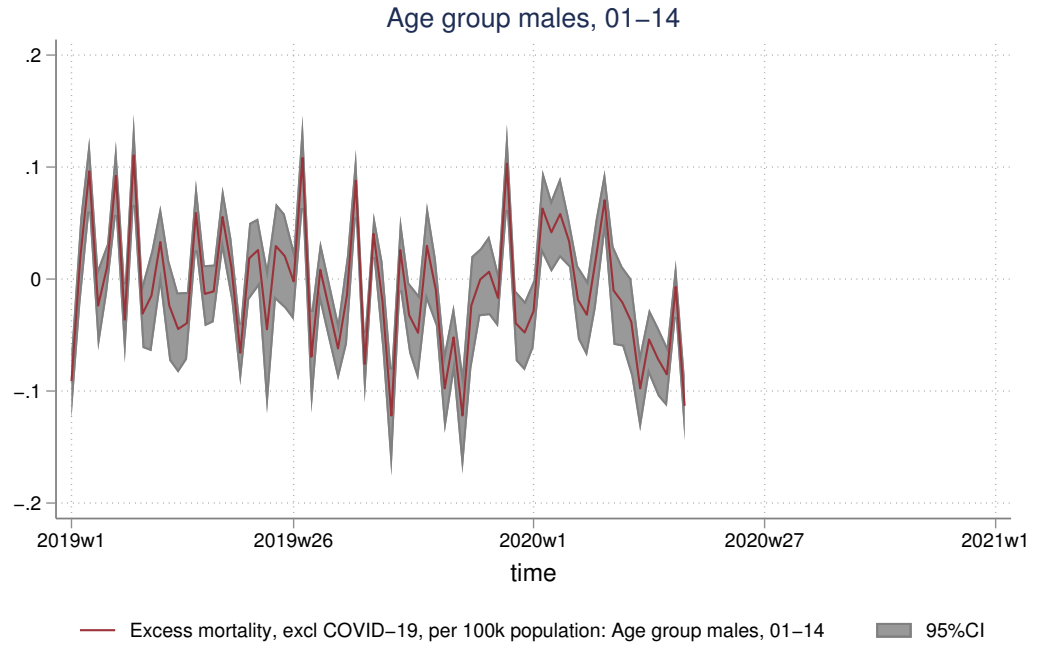

Figure 195: Males 01-14 all-cause excess deaths (-COVID19), from 2020 wk1

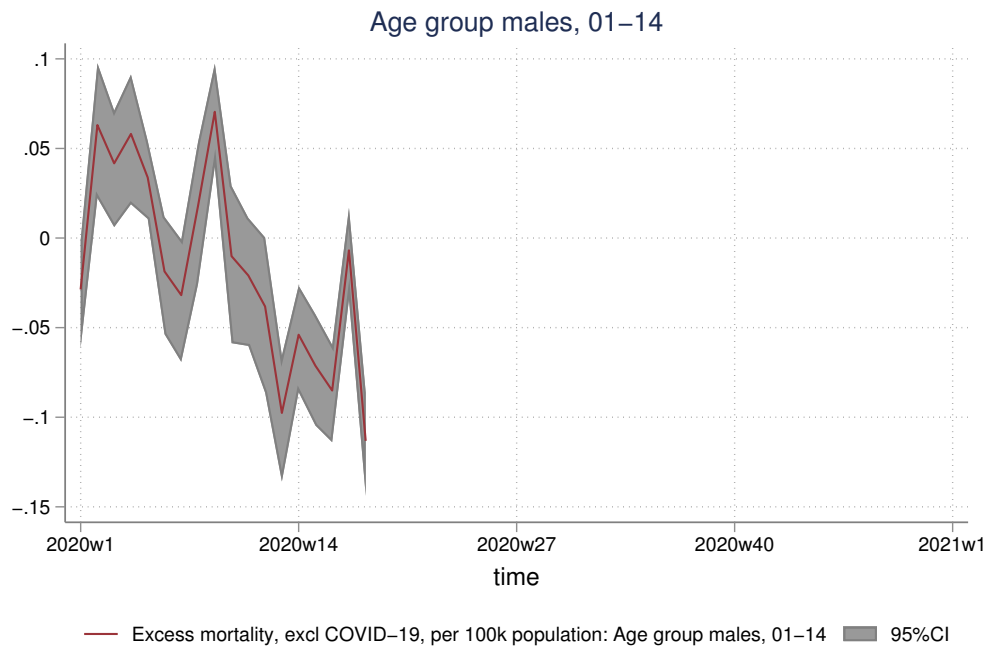

#### 4.4 Males aged 15-44

Figure 196: Males 15-44 mortality time trend and model, from 2010 wk1

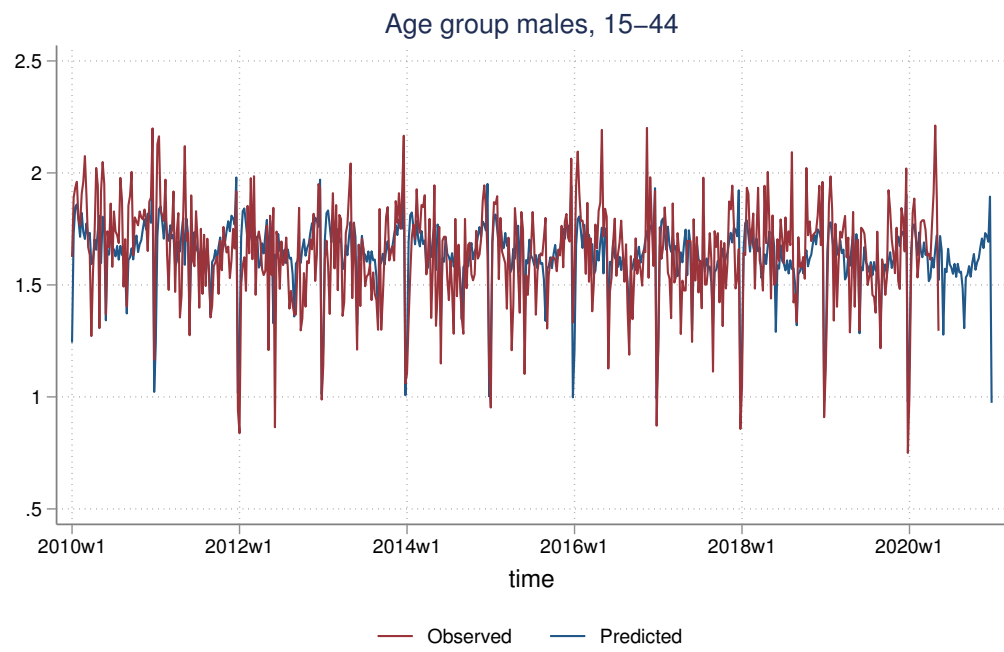

Figure 197: Males 15-44 mortality time trend and model, from 2019 wk1

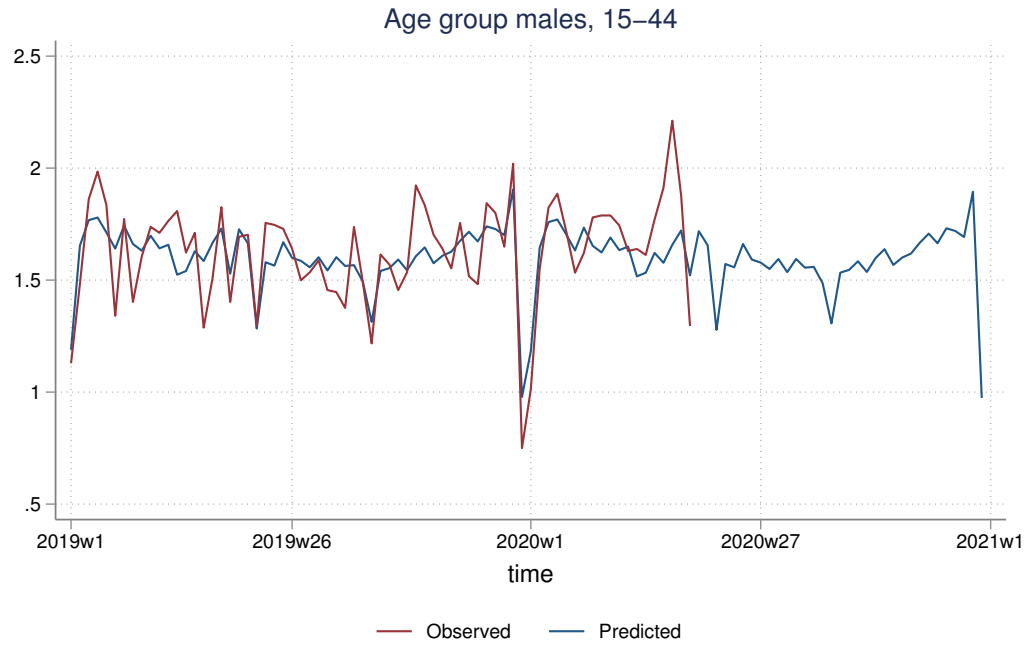

Figure 198: Males 15-44 mortality time trend and model, from 2020 wk1

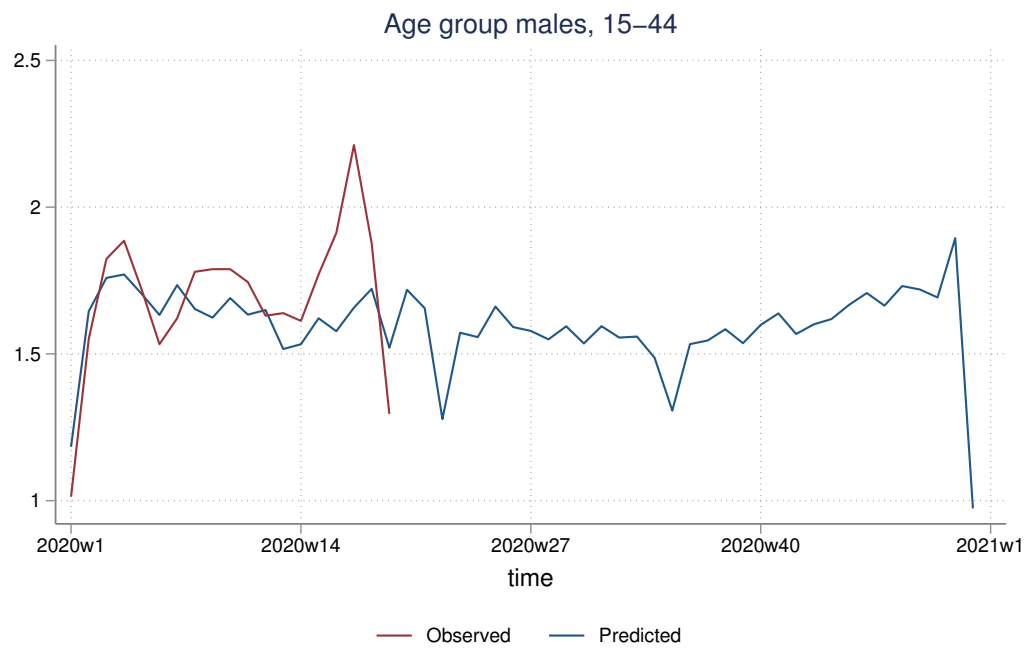

Figure 199: Males 15-44 all-cause excess deaths, from 2010 wk1

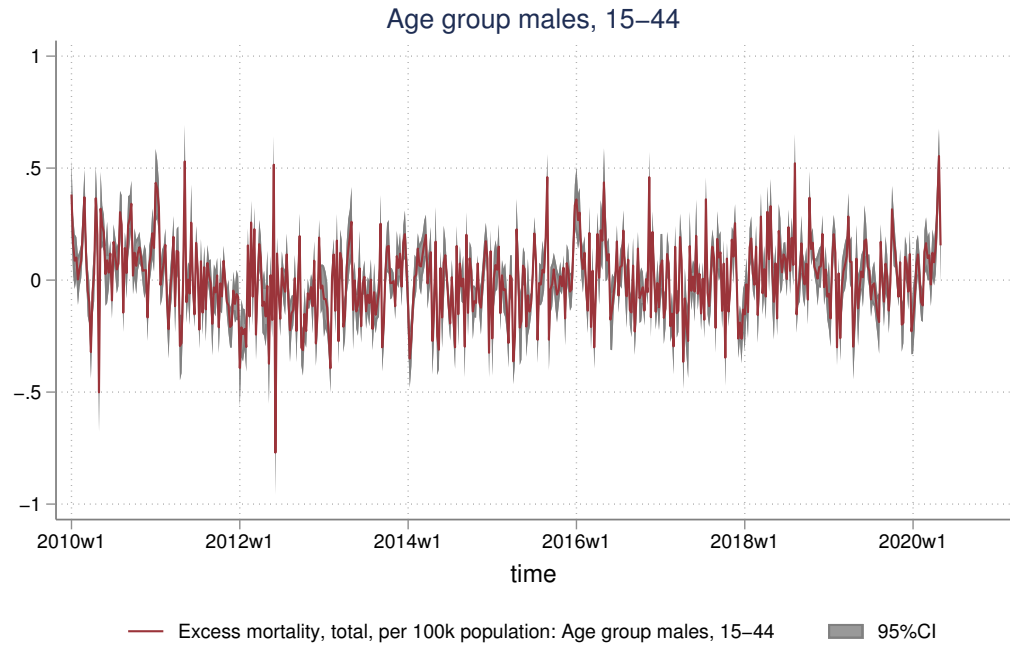

Figure 200: Males 15-44 all-cause excess deaths, from 2019 wk1

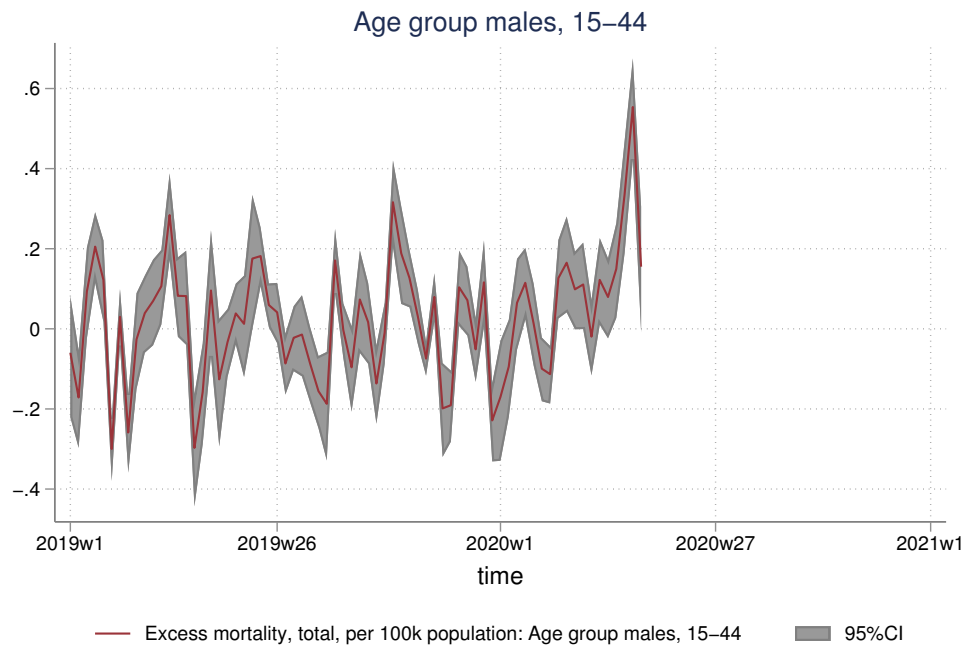



Figure 201: Males 15-44 all-cause excess deaths, from 2020 wk1

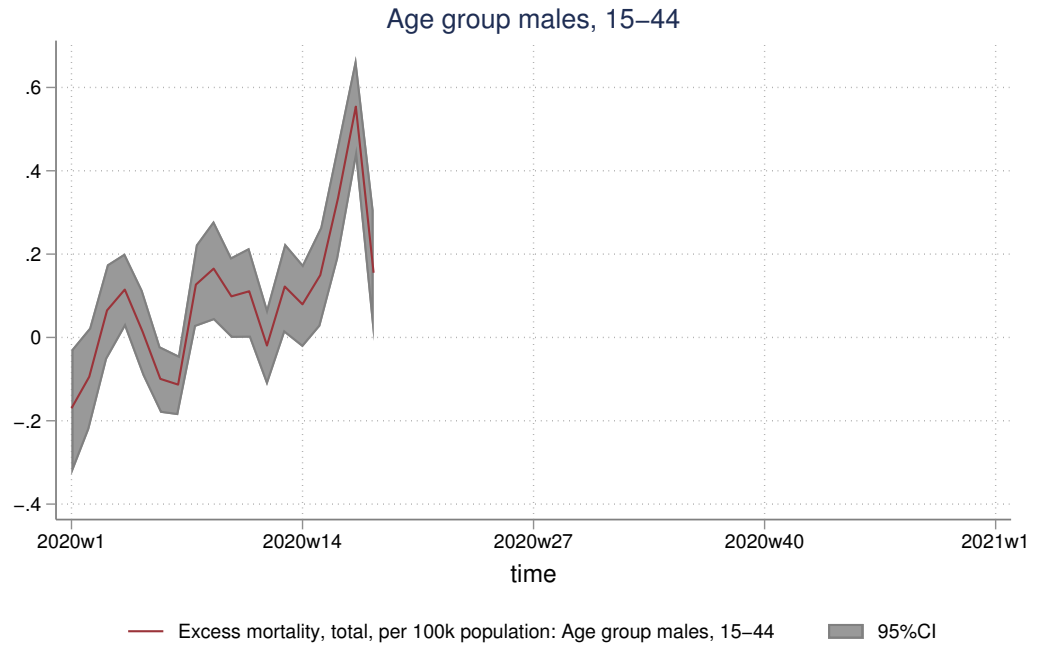

Figure 202: Males 15-44 all-cause excess deaths (-COVID19), from 2010 wk1

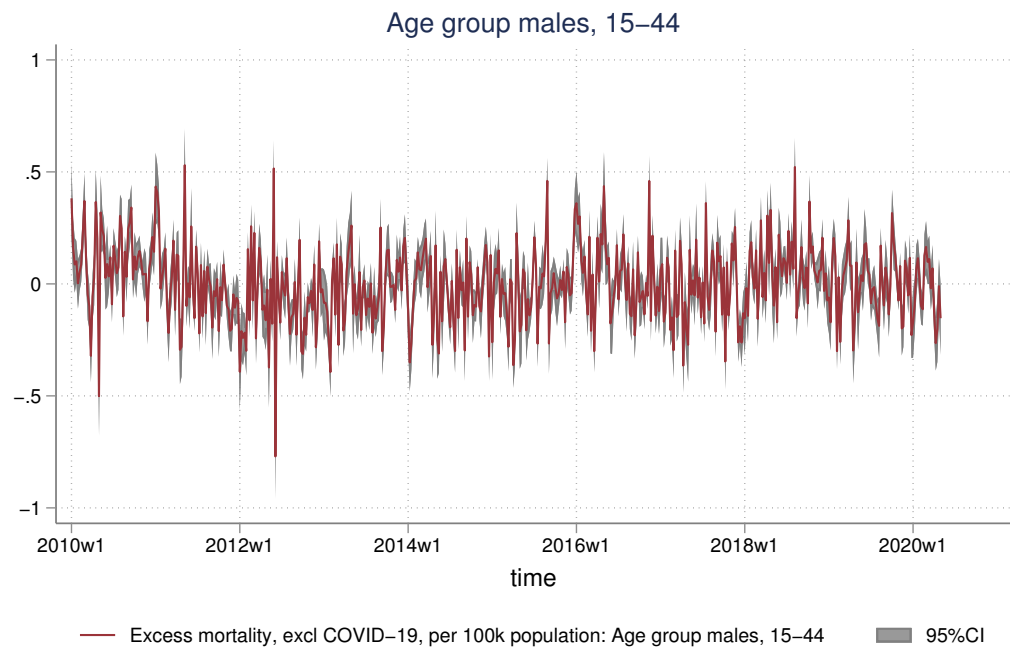

Figure 203: Males 15-44 all-cause excess deaths (-COVID19), from 2019 wk1

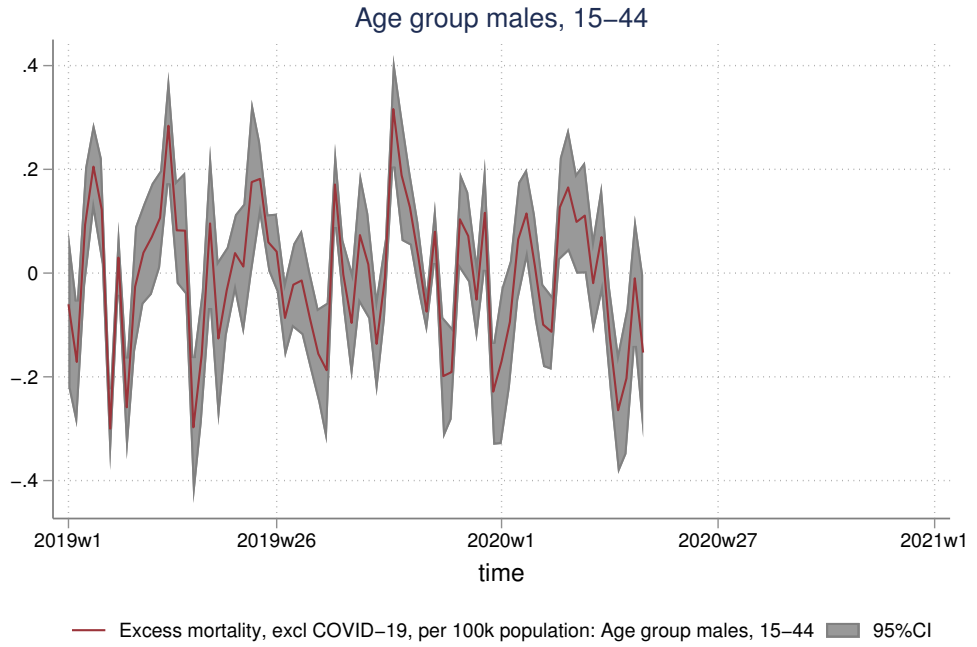

Figure 204: Males 15-44 all-cause excess deaths (-COVID19), from 2020 wk1

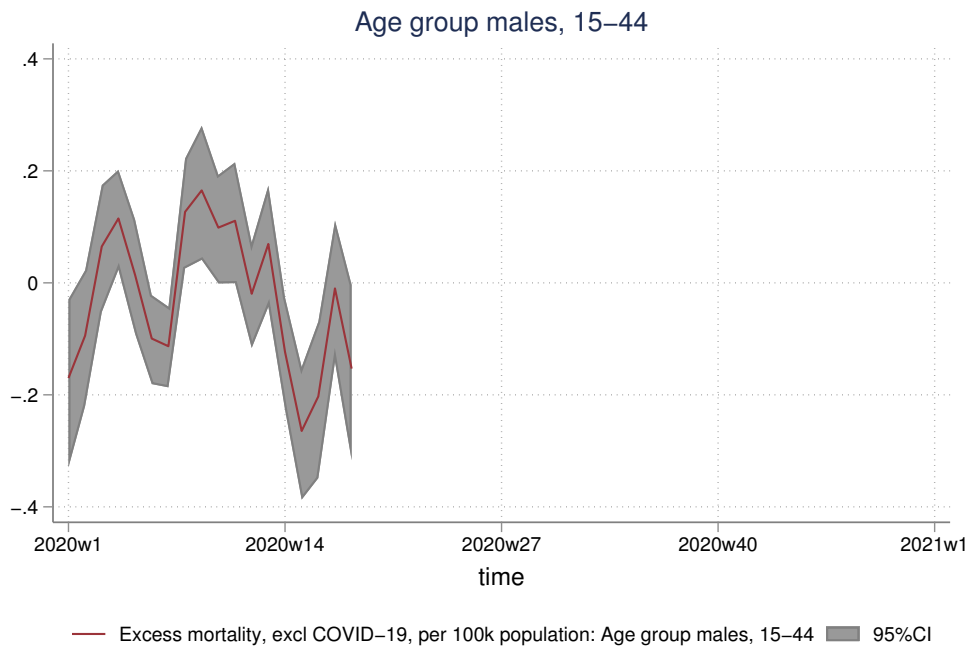

## 4.5 Males aged 45-64

Figure 205: Males 45-64 mortality time trend and model, from 2010 wk1

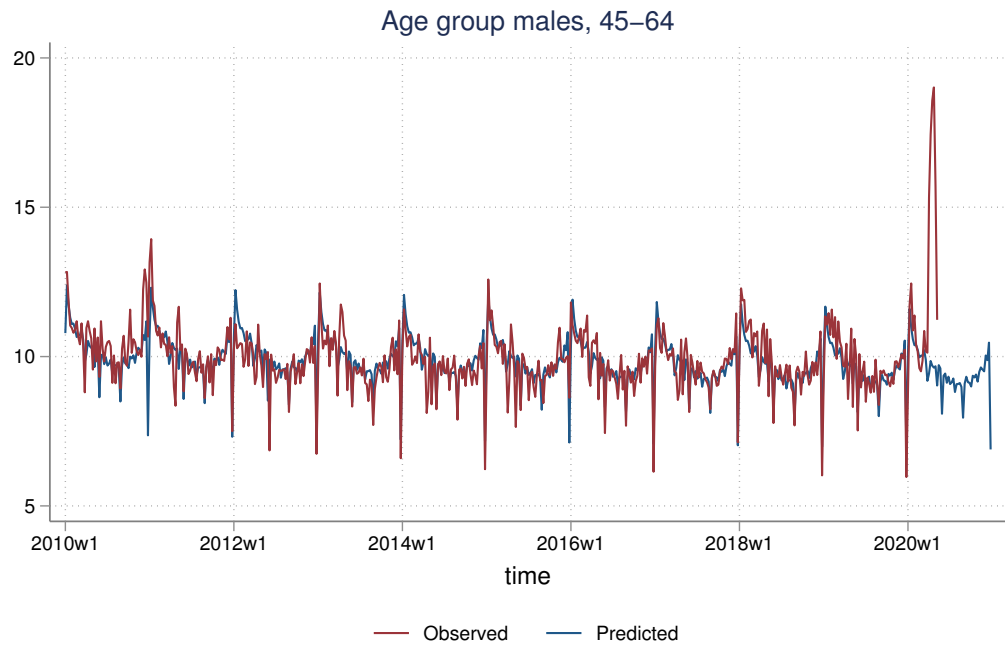

Figure 206: Males 45-64 mortality time trend and model, from 2019 wk1

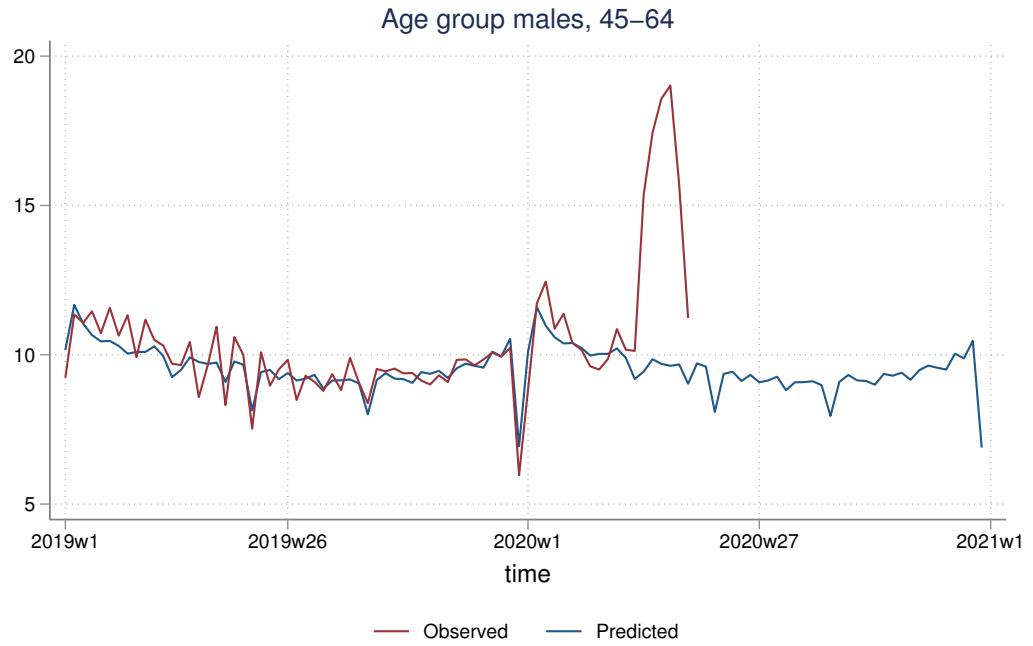

Figure 207: Males 45-64 mortality time trend and model, from 2020 wk1

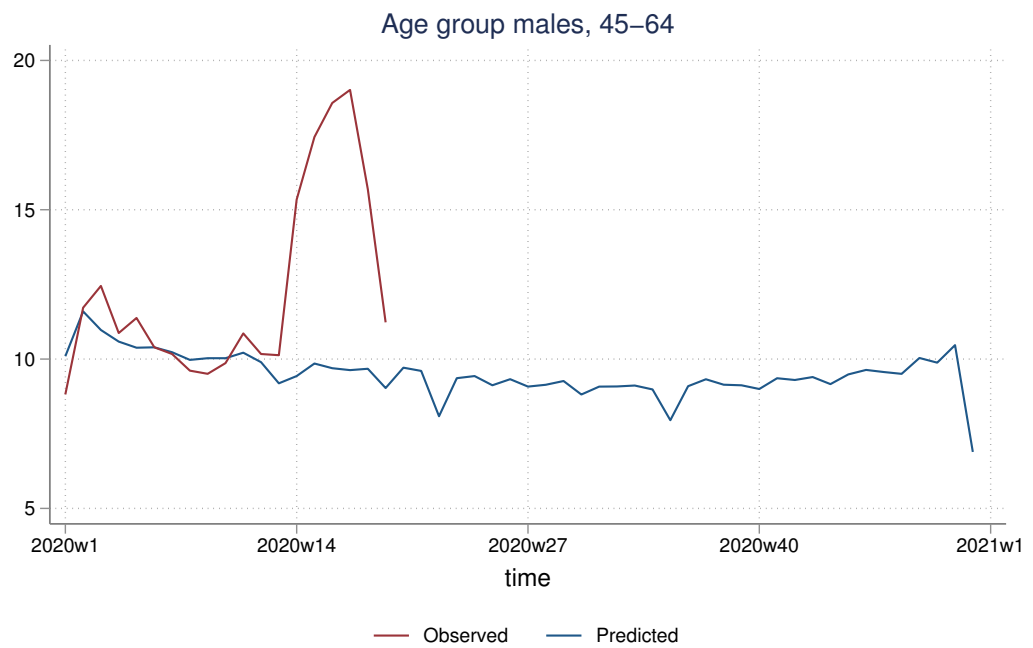

Figure 208: Males 45-64 all-cause excess deaths, from 2010 wk1

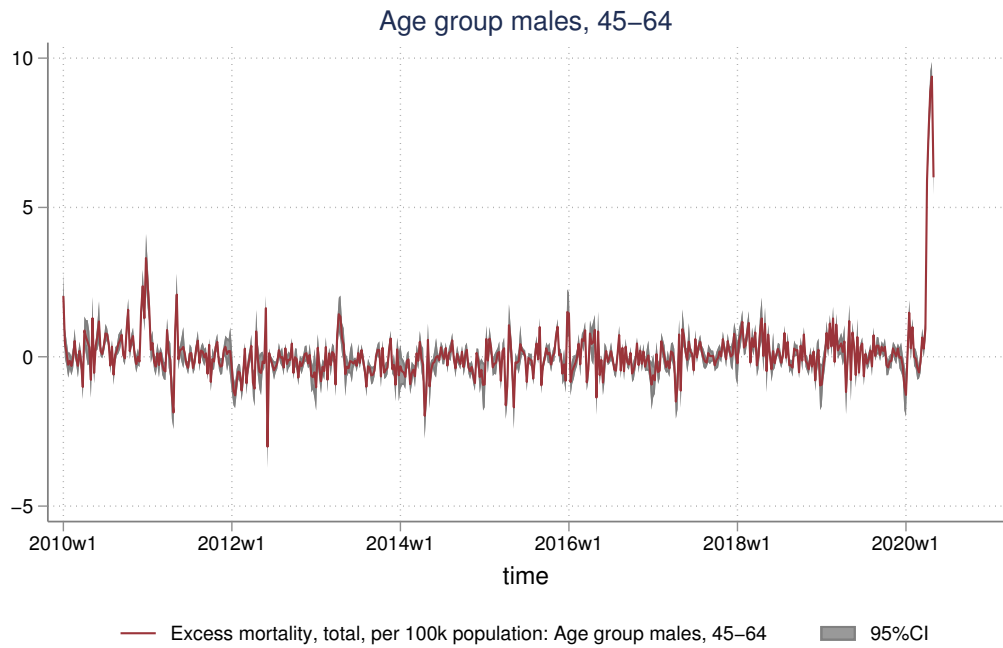

Figure 209: Males 45-64 all-cause excess deaths, from 2019 wk1

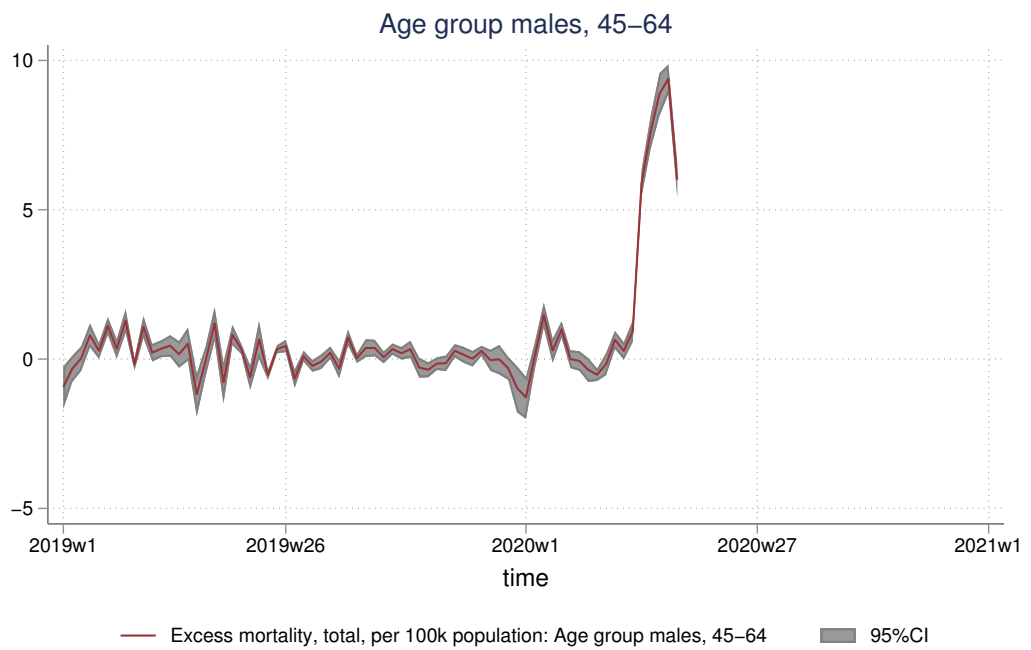

Figure 210: Males 45-64 all-cause excess deaths, from 2020 wk1

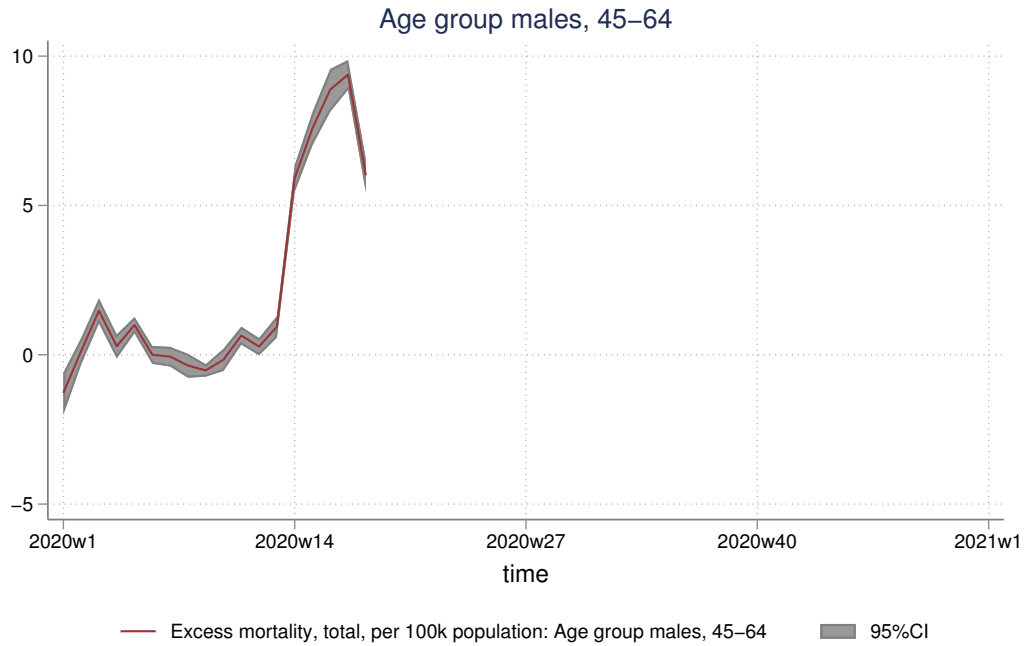

Figure 211: Males 45-64 all-cause excess deaths (-COVID19), from 2010 wk1

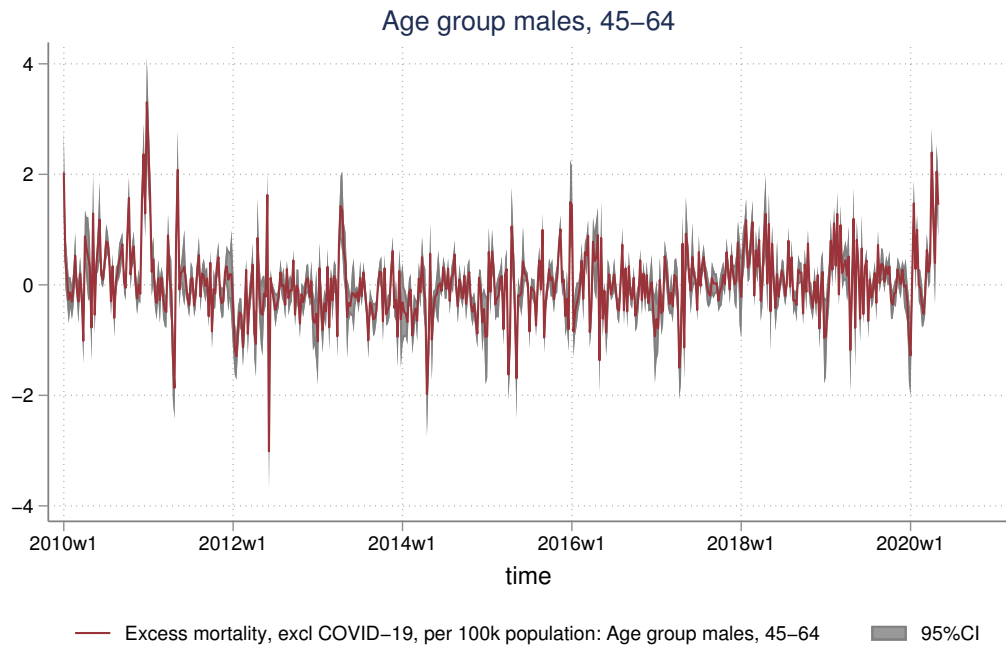

Figure 212: Males 45-64 all-cause excess deaths (-COVID19), from 2019 wk1

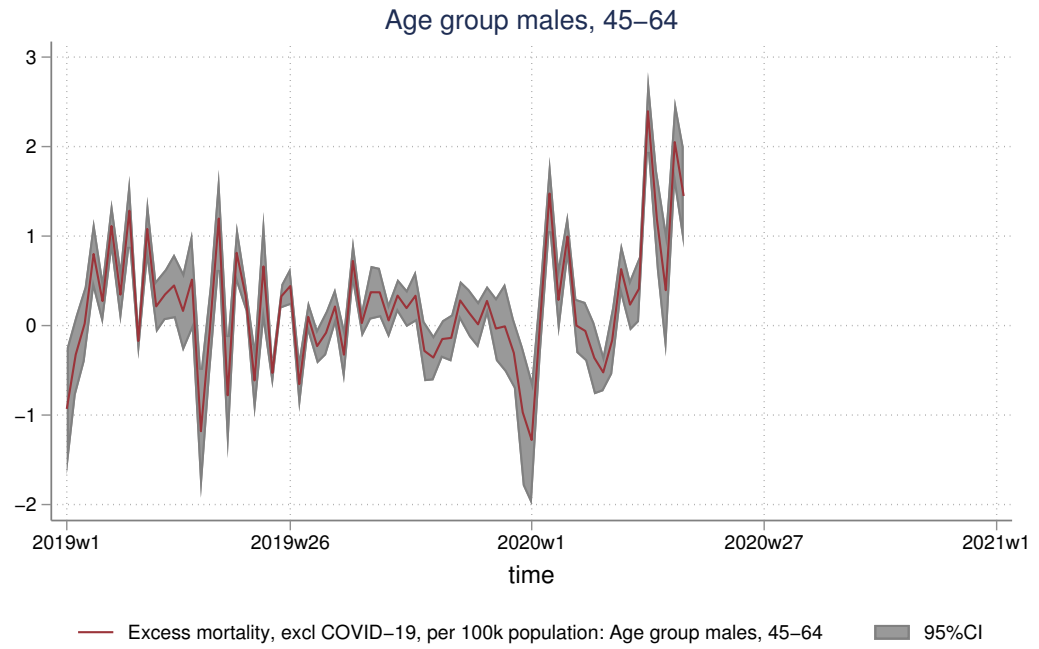

Figure 213: Males 45-64 all-cause excess deaths (-COVID19), from 2020 wk1

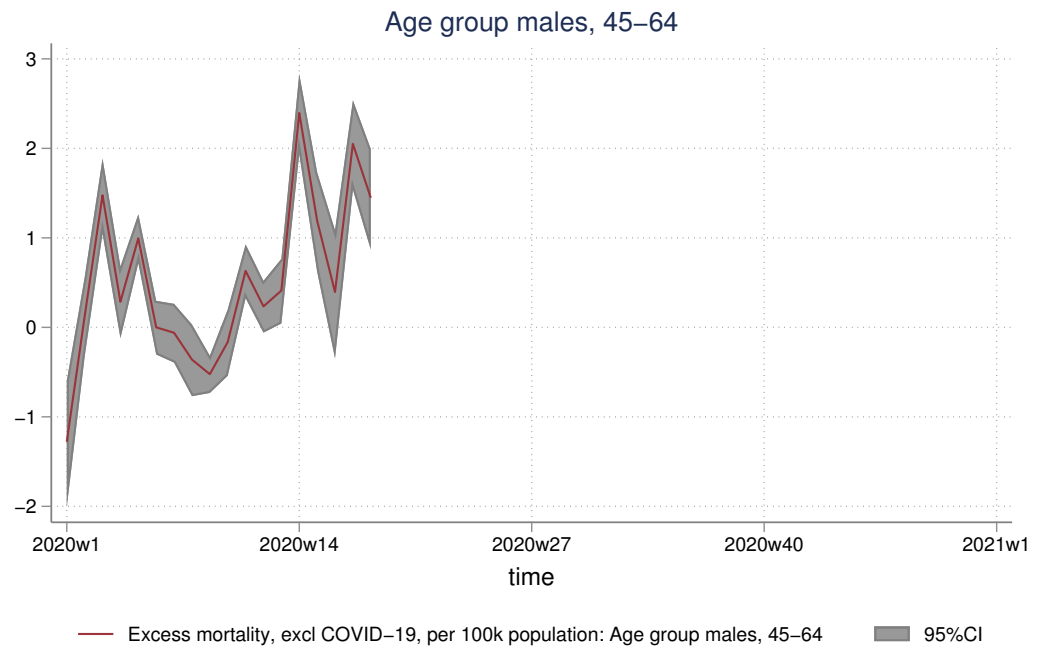

## 4.6 Males aged 65-74

Figure 214: Males 65-74 mortality time trend and model, from 2010 wk1

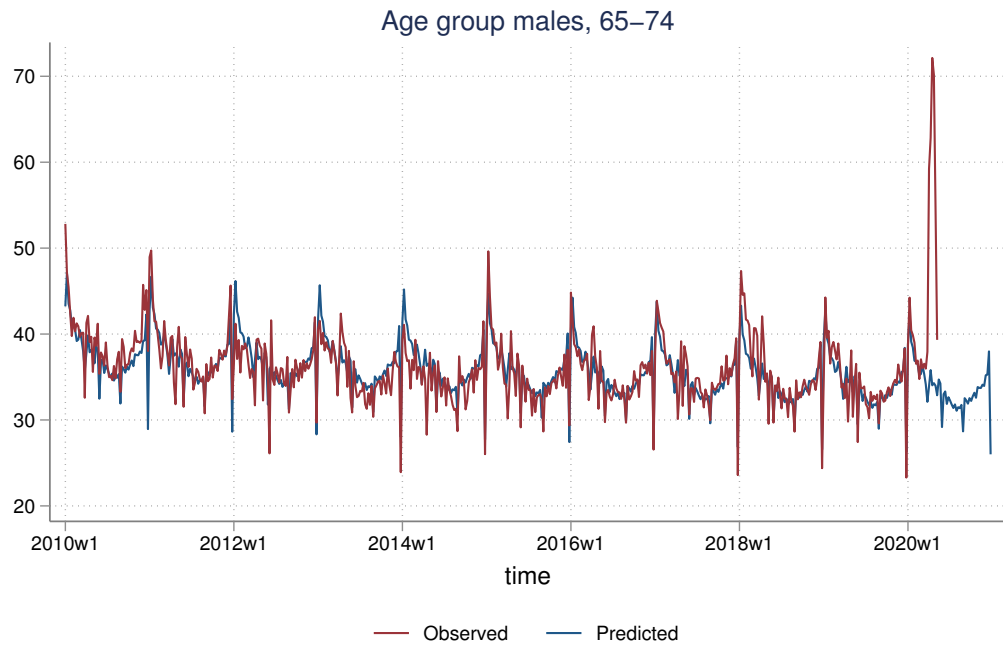



Figure 215: Males 65-74 mortality time trend and model, from 2019 wk1

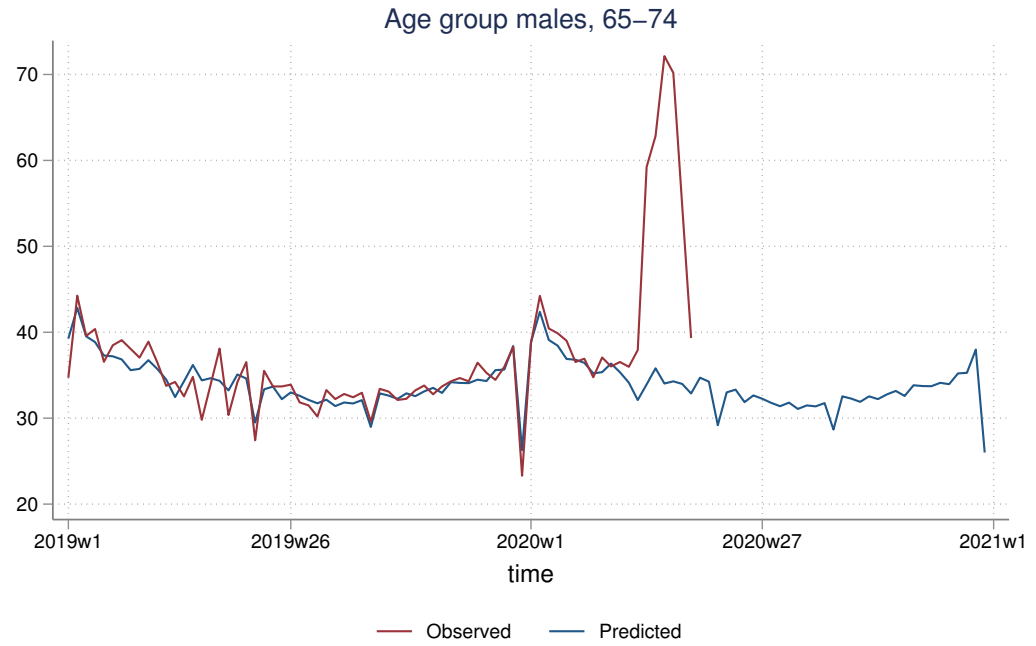

Figure 216: Males 65-74 mortality time trend and model, from 2020 wk1

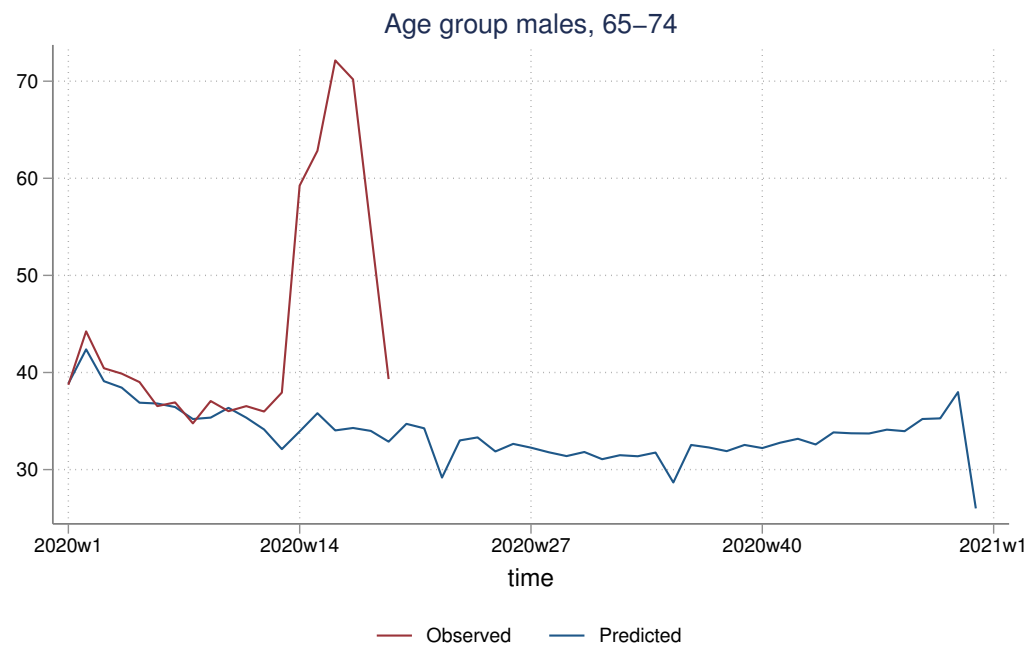

Figure 217: Males 65-74 all-cause excess deaths, from 2010 wk1

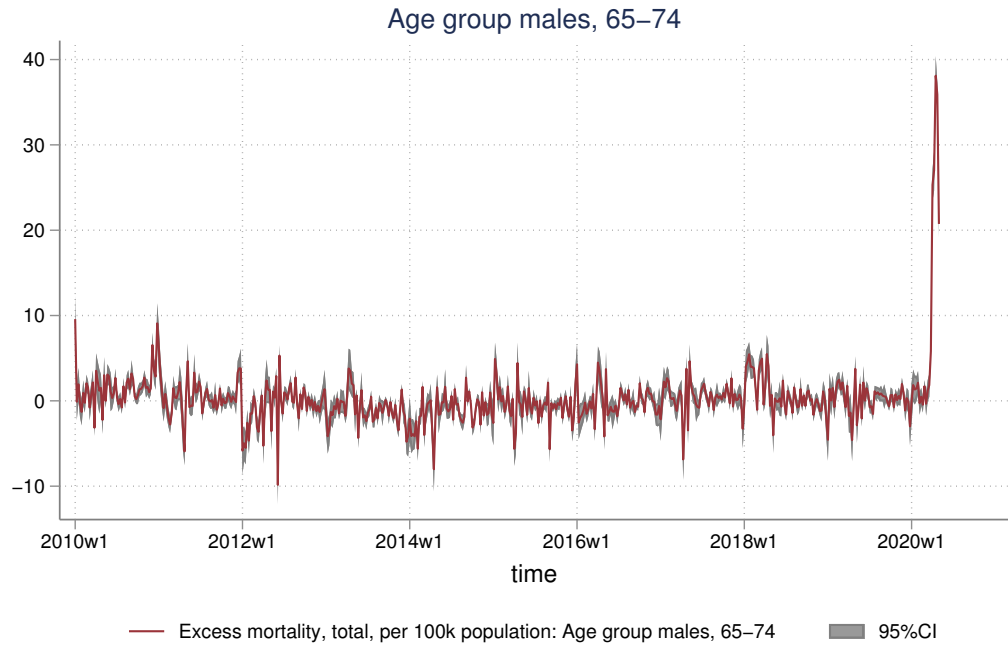

Figure 218: Males 65-74 all-cause excess deaths, from 2019 wk1

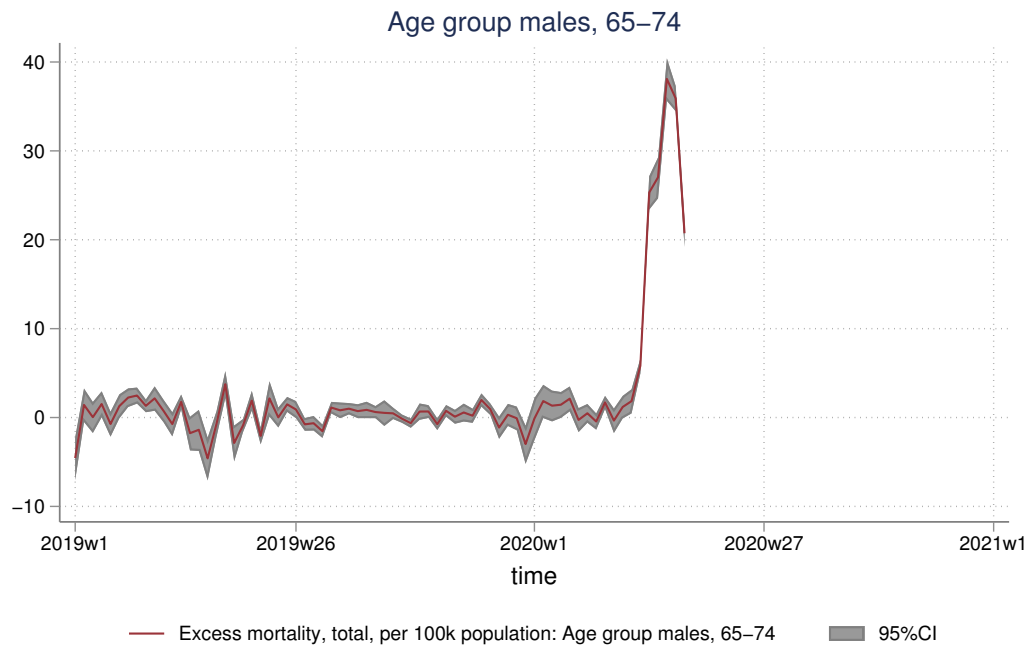

Figure 219: Males 65-74 all-cause excess deaths, from 2020 wk1

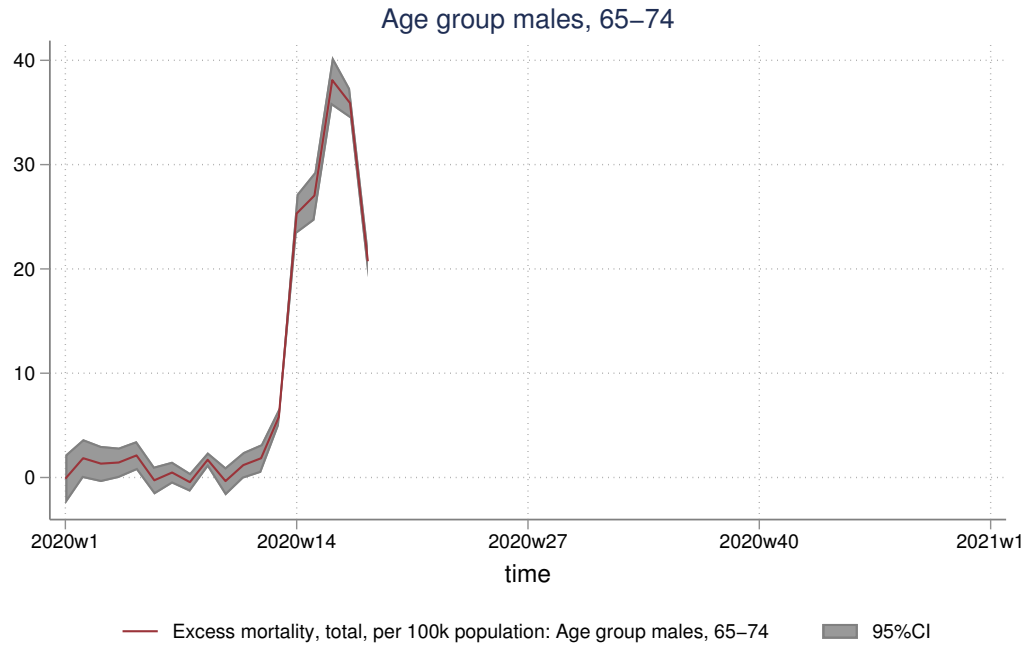

Figure 220: Males 65-74 all-cause excess deaths (-COVID19), from 2010 wk1

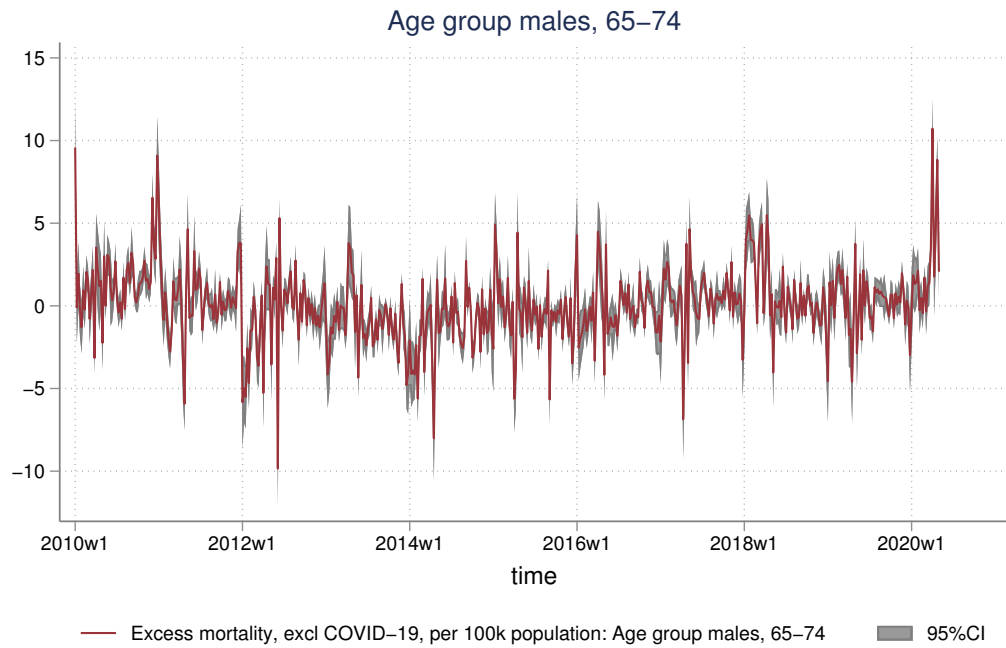

Figure 221: Males 65-74 all-cause excess deaths (-COVID19), from 2019 wk1

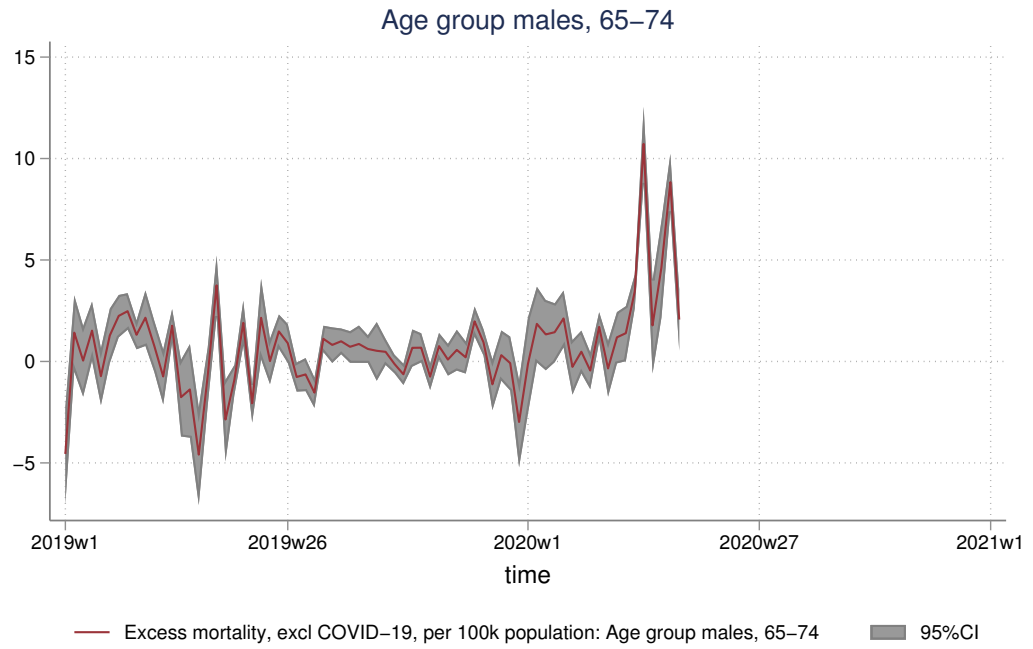

Figure 222: Males 65-74 all-cause excess deaths (-COVID19), from 2020 wk1

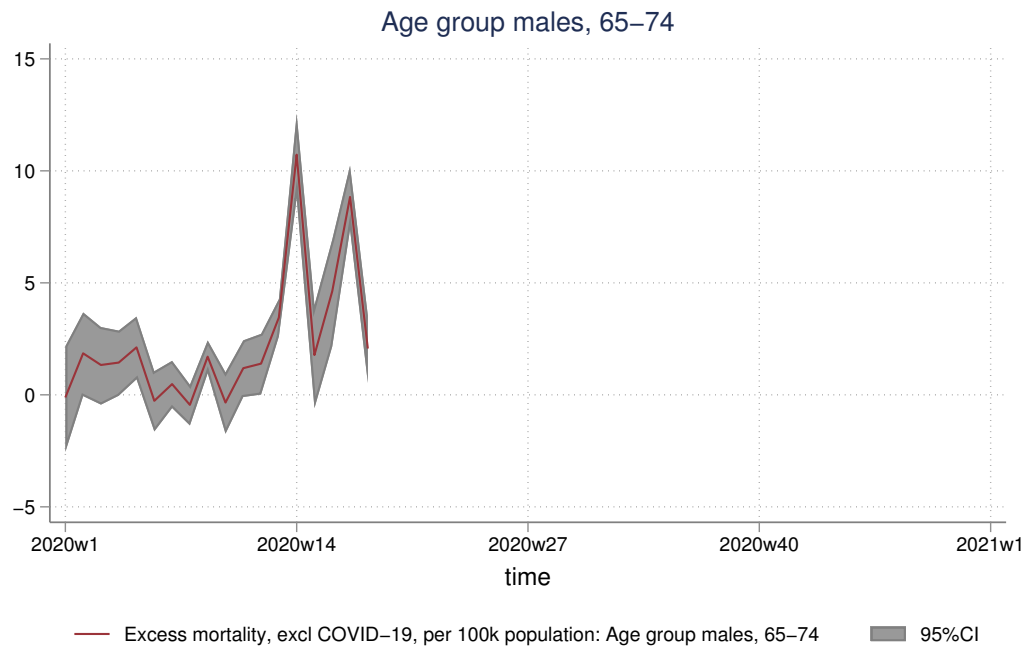

## 4.7 Males aged 75-84

Figure 223: Males 75-84 mortality time trend and model, from 2010 wk1

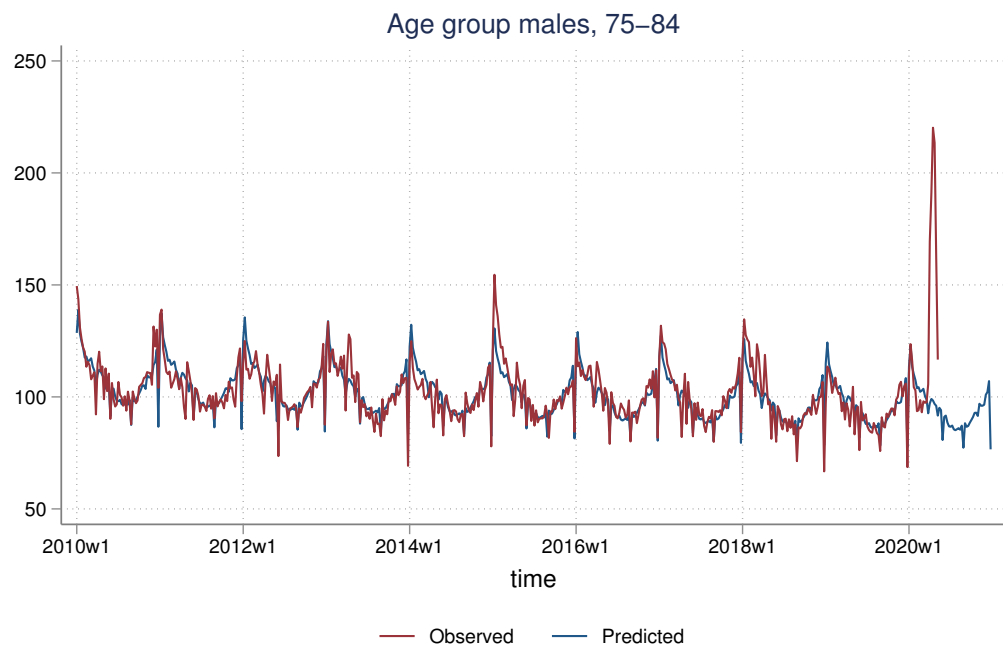

Figure 224: Males 75-84 mortality time trend and model, from 2019 wk1

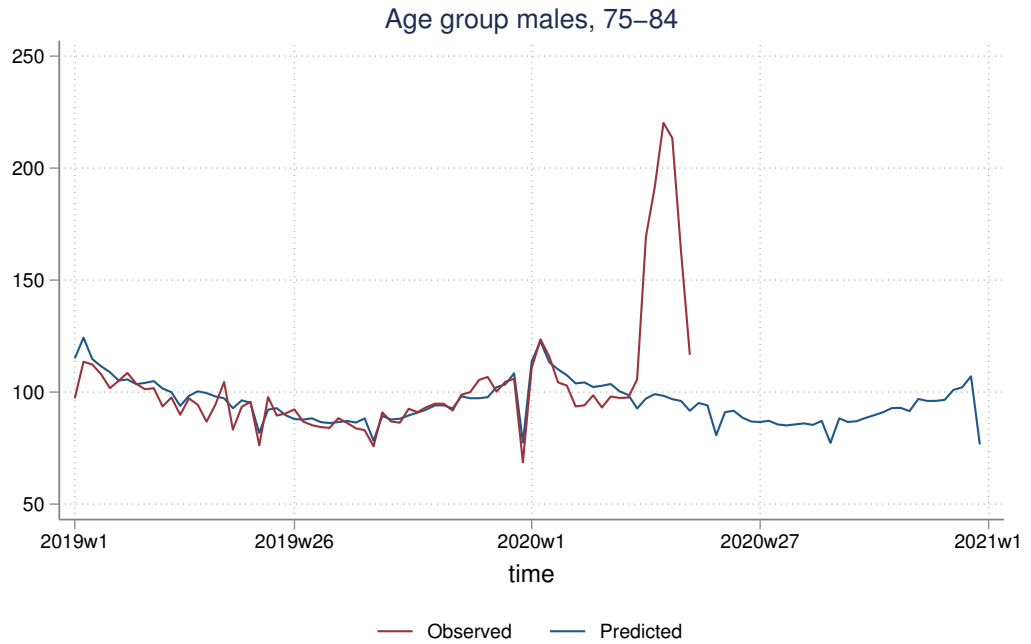

Figure 225: Males 75-84 mortality time trend and model, from 2020 wk1

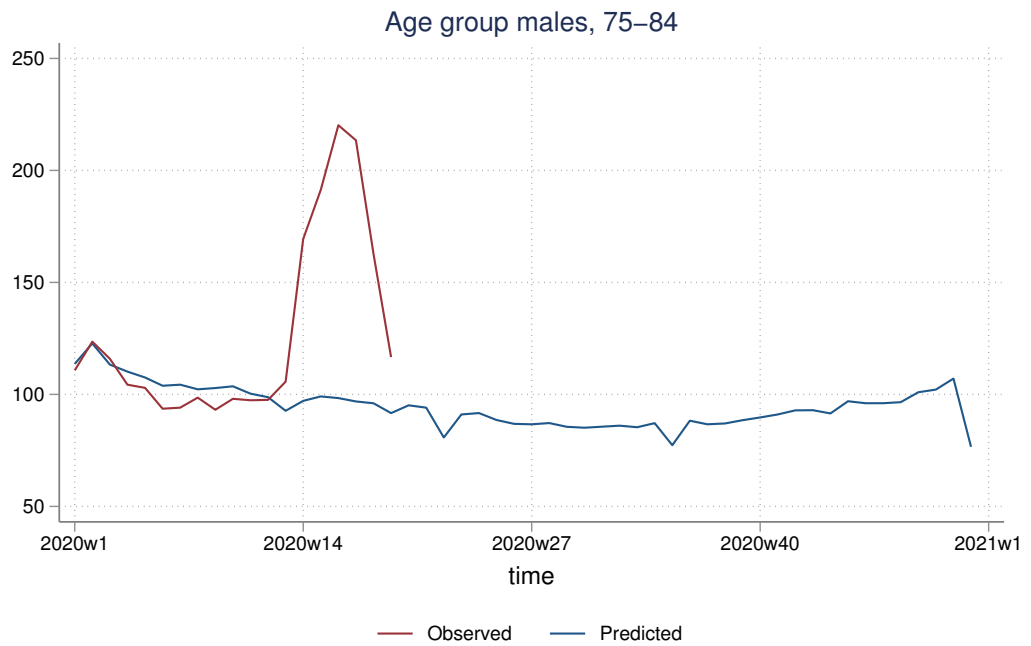

Figure 226: Males 75-84 all-cause excess deaths, from 2010 wk1

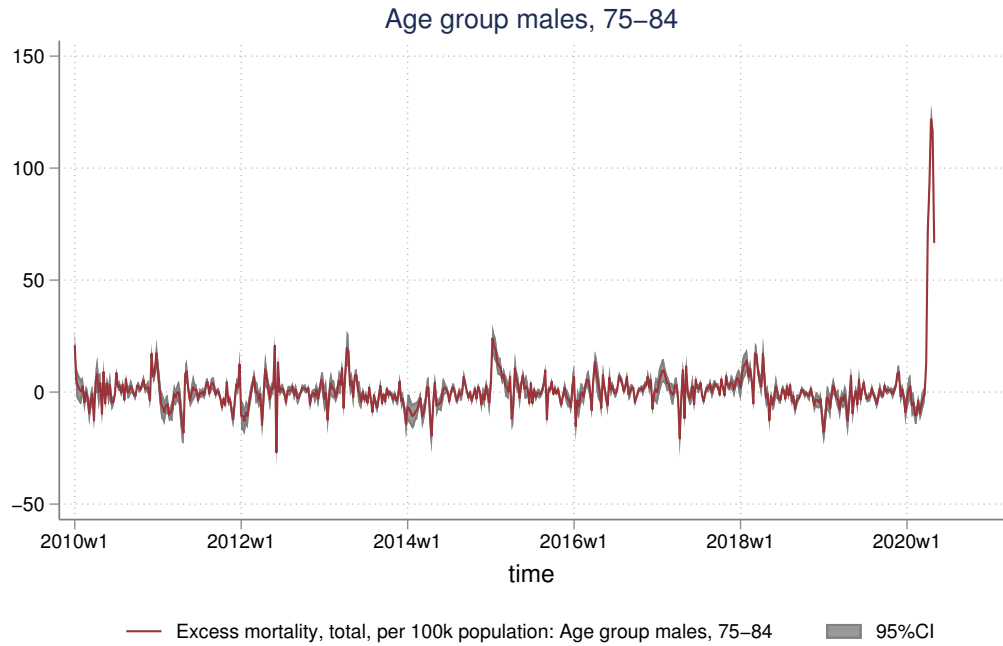

Figure 227: Males 75-84 all-cause excess deaths, from 2019 wk1

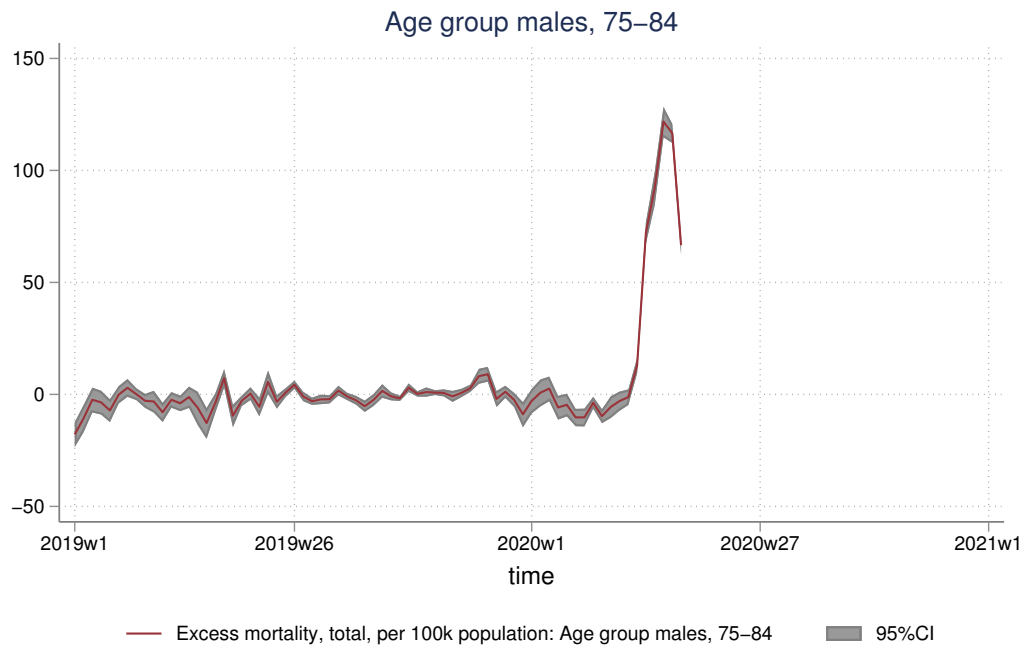

Figure 228: Males 75-84 all-cause excess deaths, from 2020 wk1

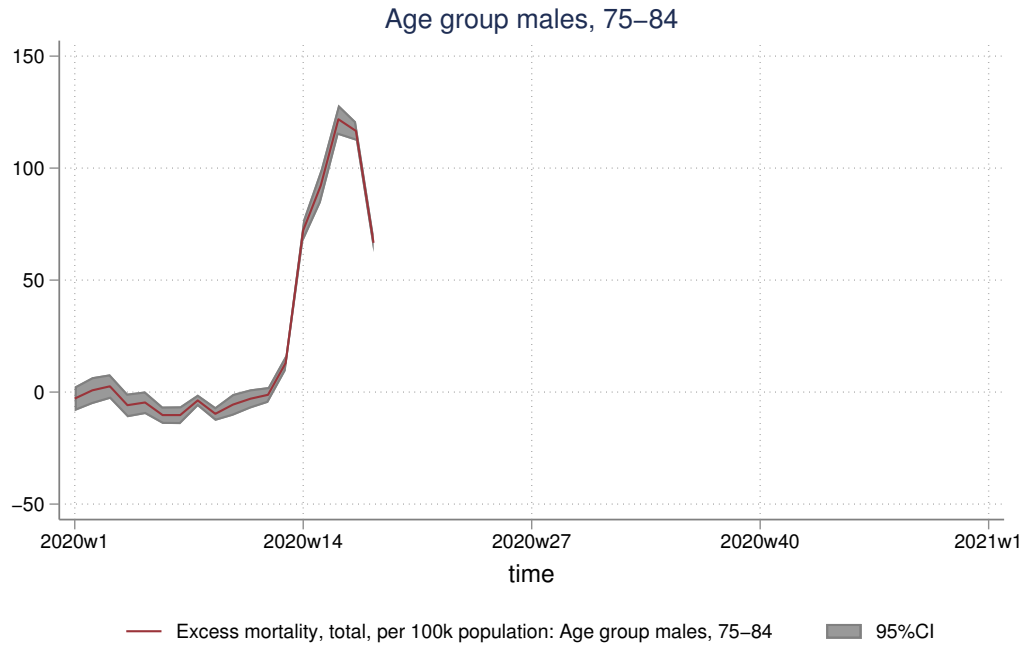

Figure 229: Males 75-84 all-cause excess deaths (-COVID19), from 2010 wk1

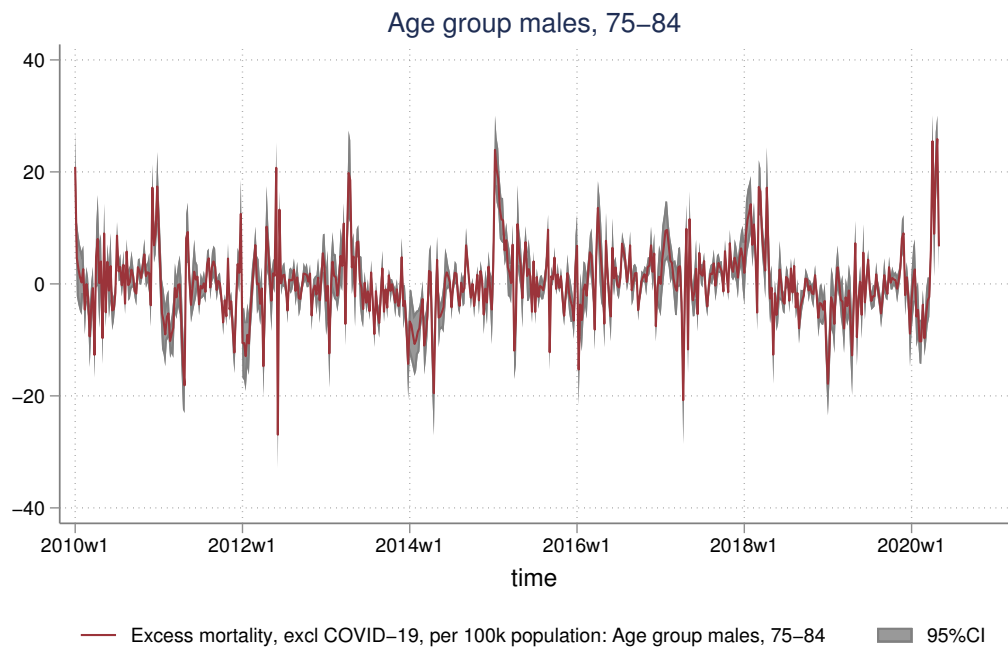



Figure 230: Males 75-84 all-cause excess deaths (-COVID19), from 2019 wk1

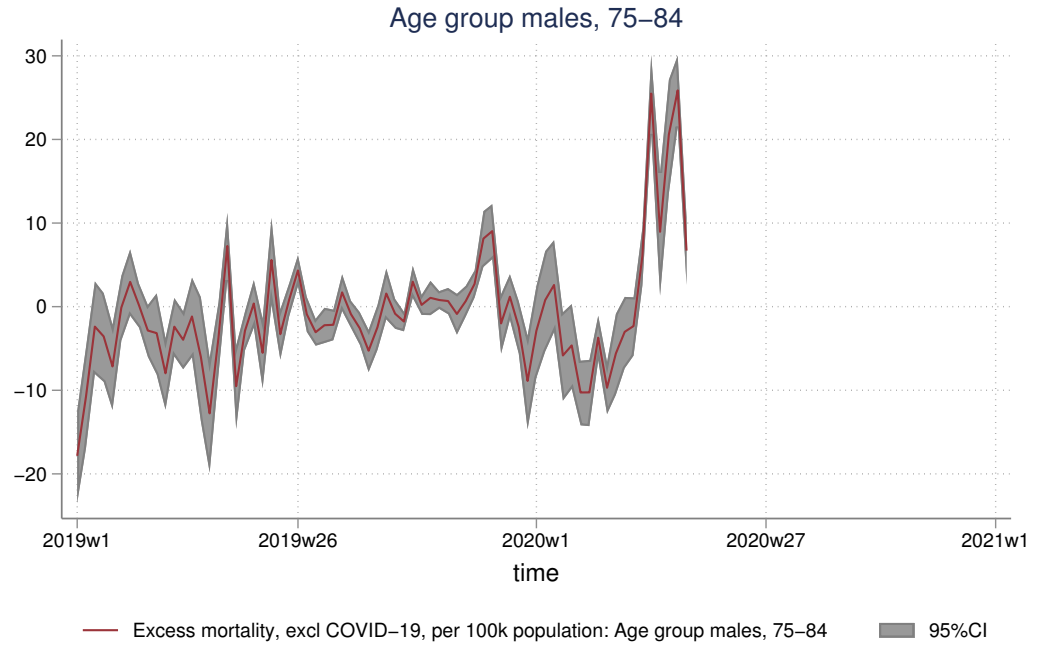

Figure 231: Males 75-84 all-cause excess deaths (-COVID19), from 2020 wk1

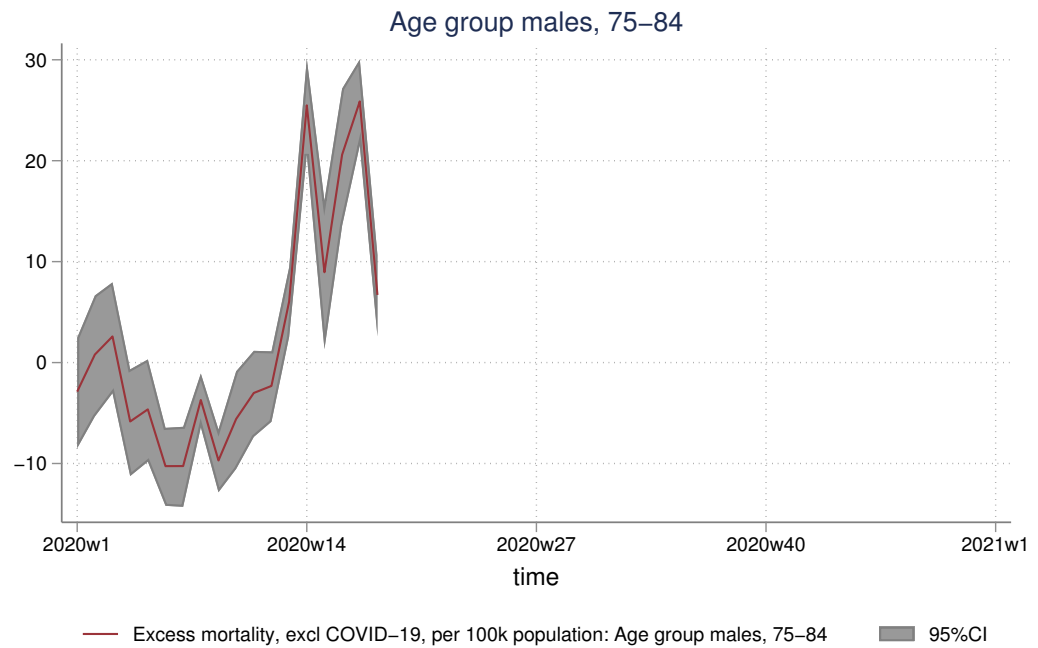

## 4.8 Males aged 85+

Figure 232: Males 85+ mortality time trend and model, from 2010 wk1

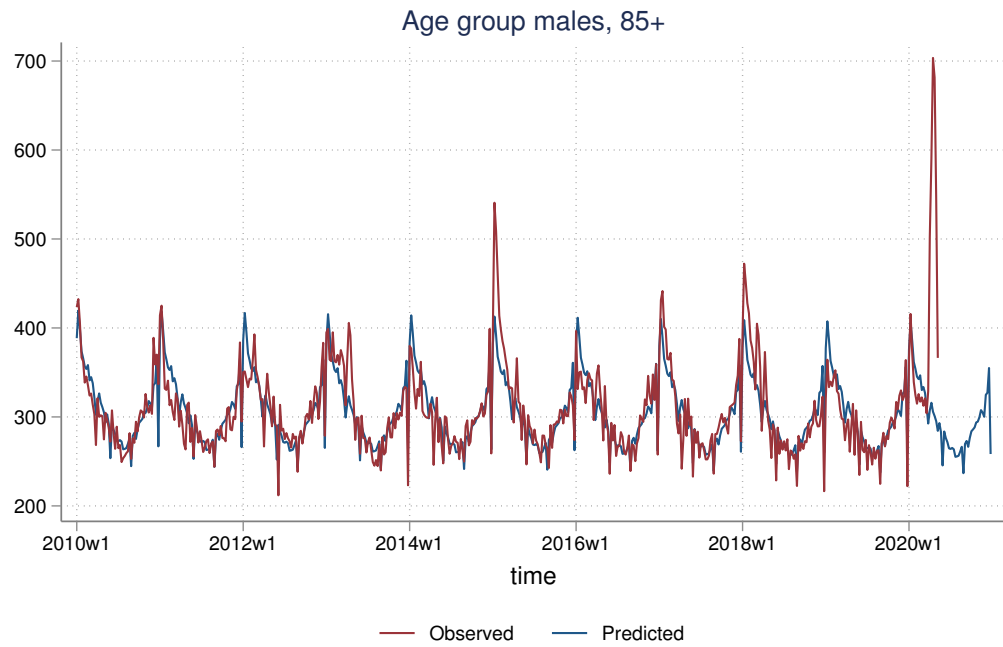

Figure 233: Males 85+ mortality time trend and model, from 2019 wk1

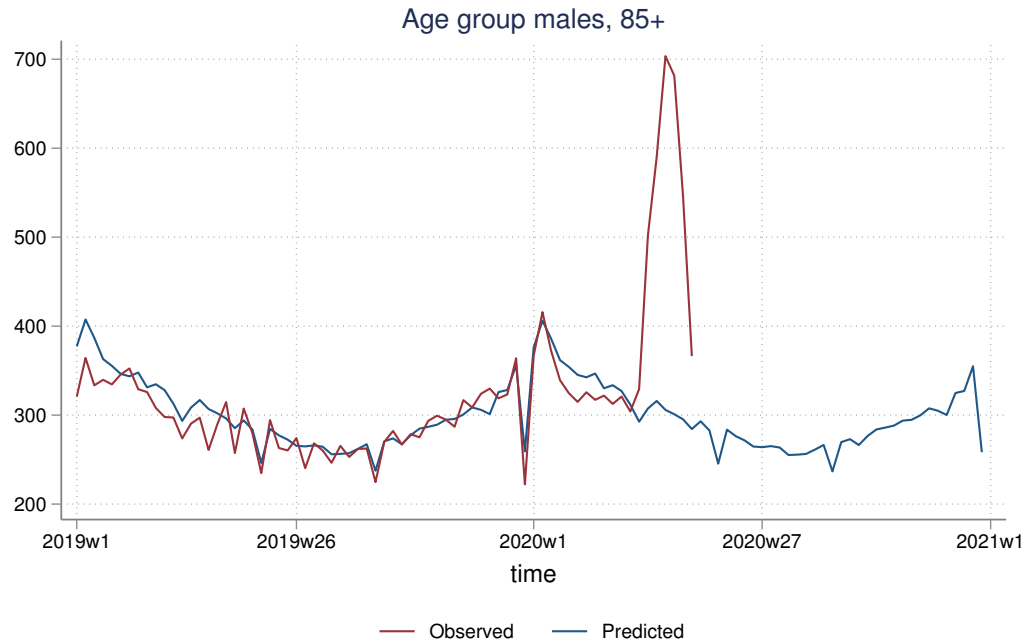

Figure 234: Males 85+ mortality time trend and model, from 2020 wk1

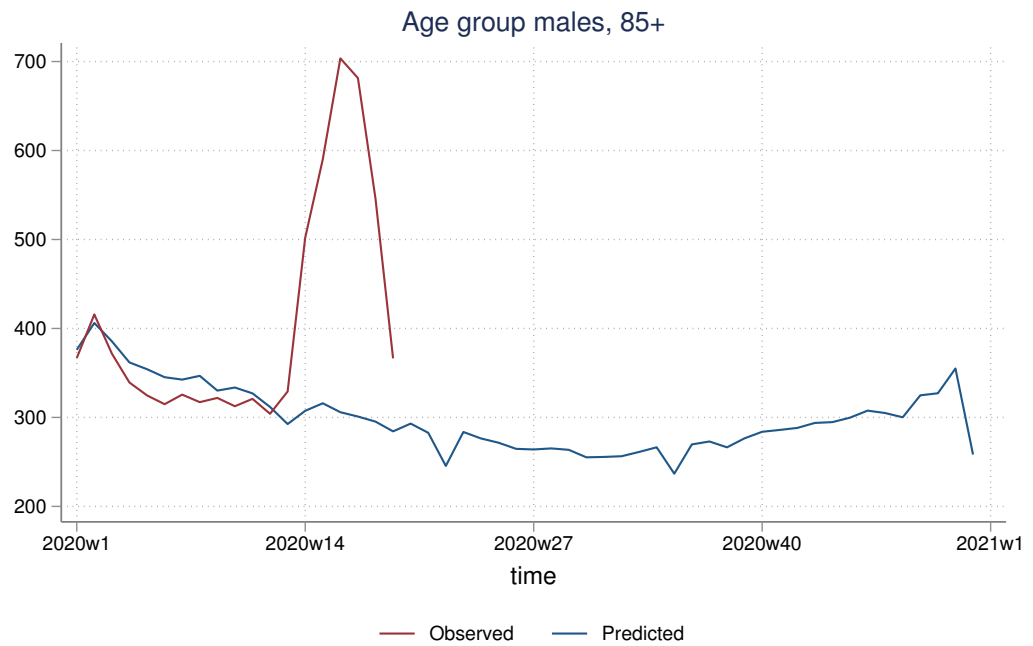

Figure 235: Males 85+ all-cause excess deaths, from 2010 wk1

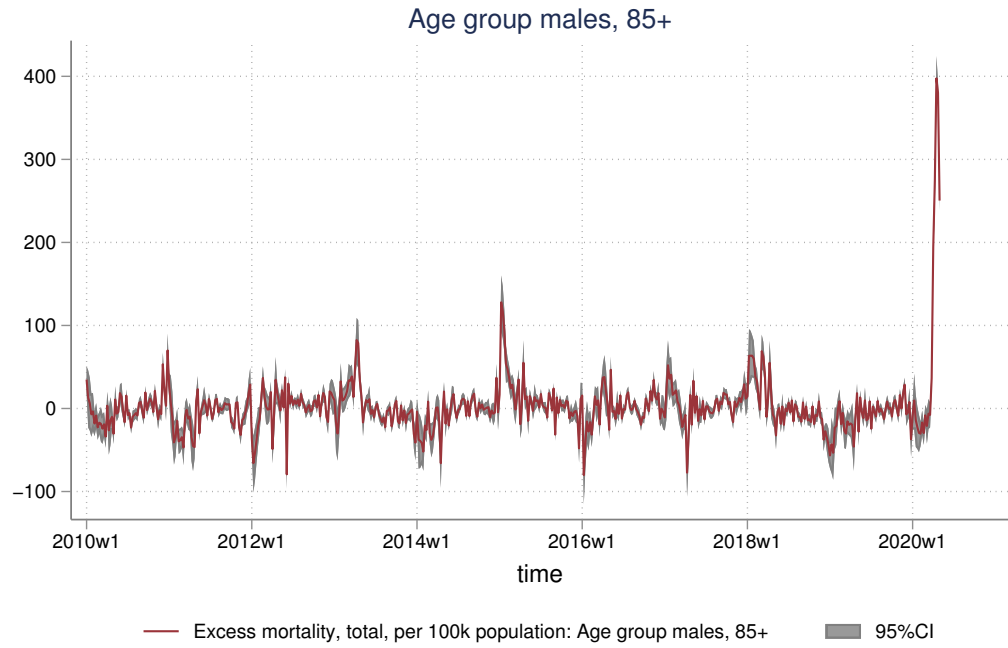

Figure 236: Males 85+ all-cause excess deaths, from 2019 wk1

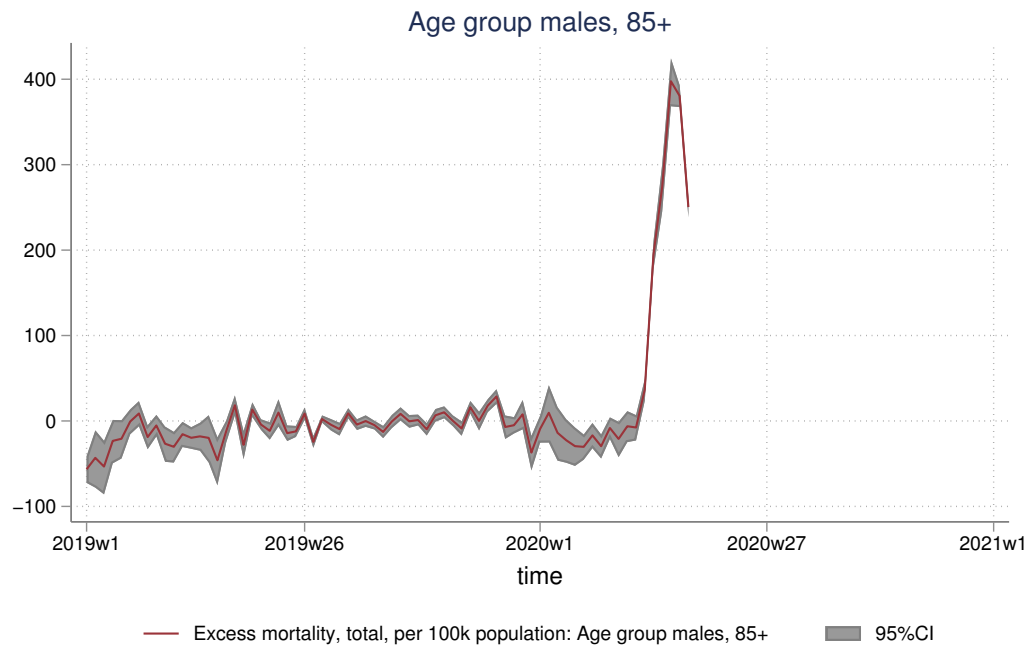

Figure 237: Males 85+ all-cause excess deaths, from 2020 wk1

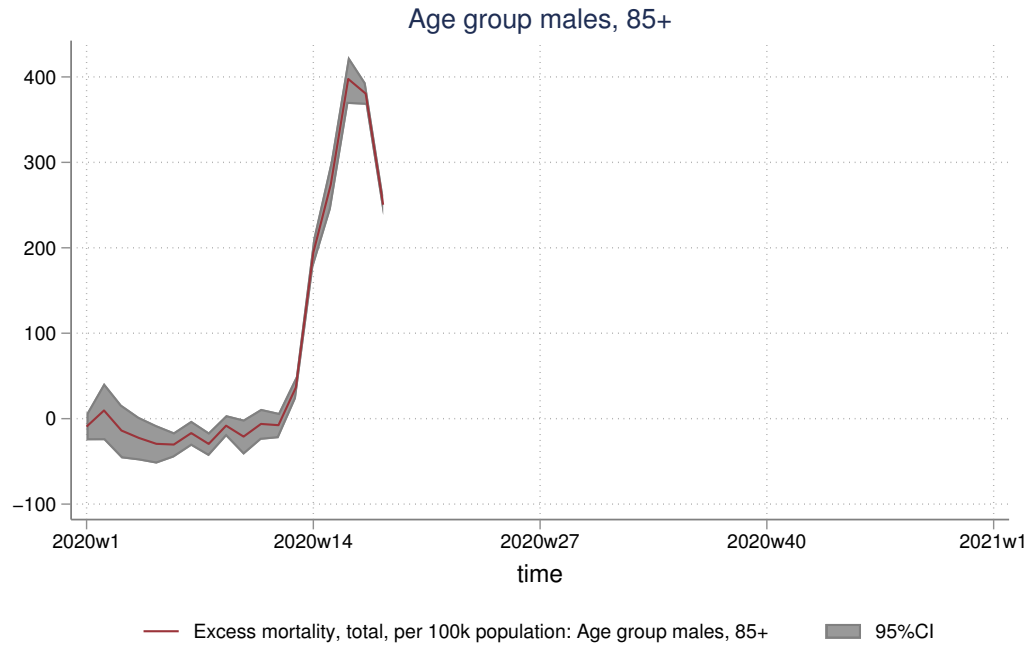

Figure 238: Males 85+ all-cause excess deaths (-COVID19), from 2010 wk1

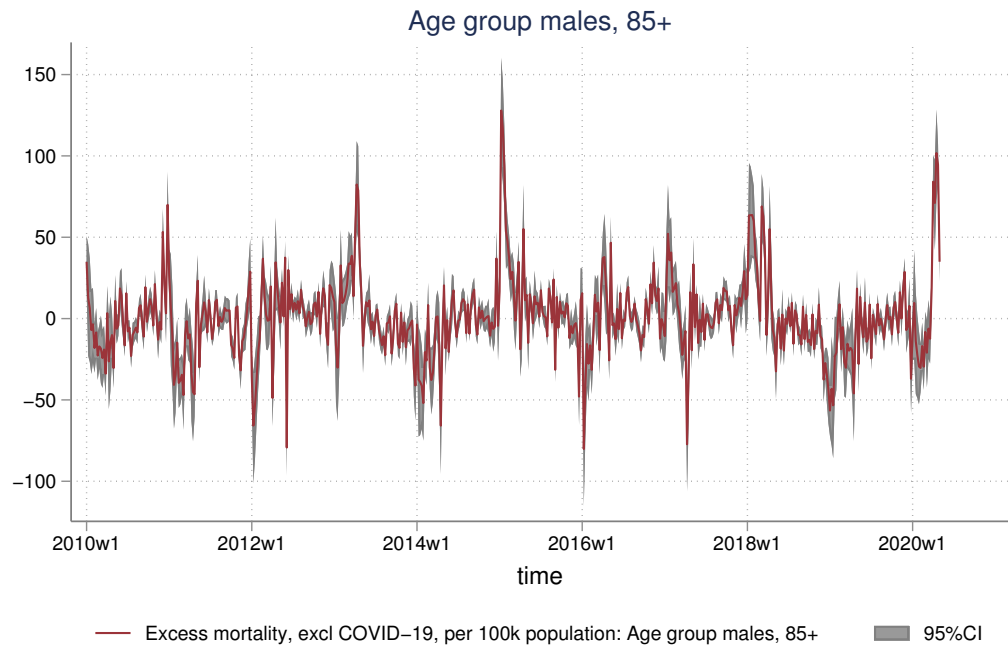

Figure 239: Males 85+ all-cause excess deaths (-COVID19), from 2019 wk1

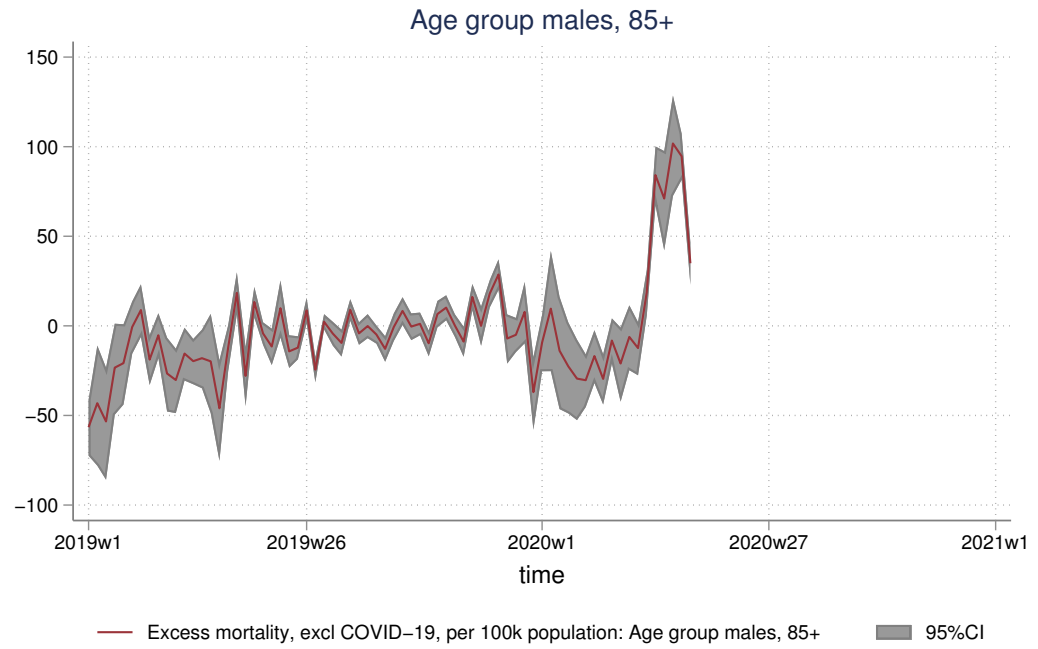

Figure 240: Males 85+ all-cause excess deaths (-COVID19), from 2020 wk1

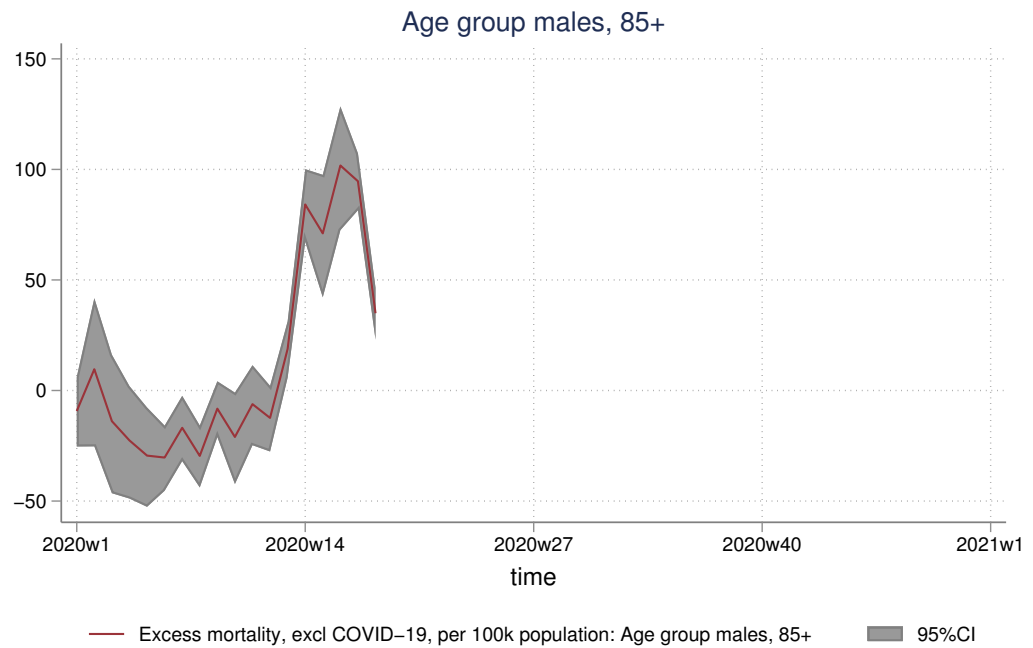

## 5 Age groups, per 100k females

### 5.1 Time trends

Figure 241: Female age group mortality time trends, fm 2010 wk1

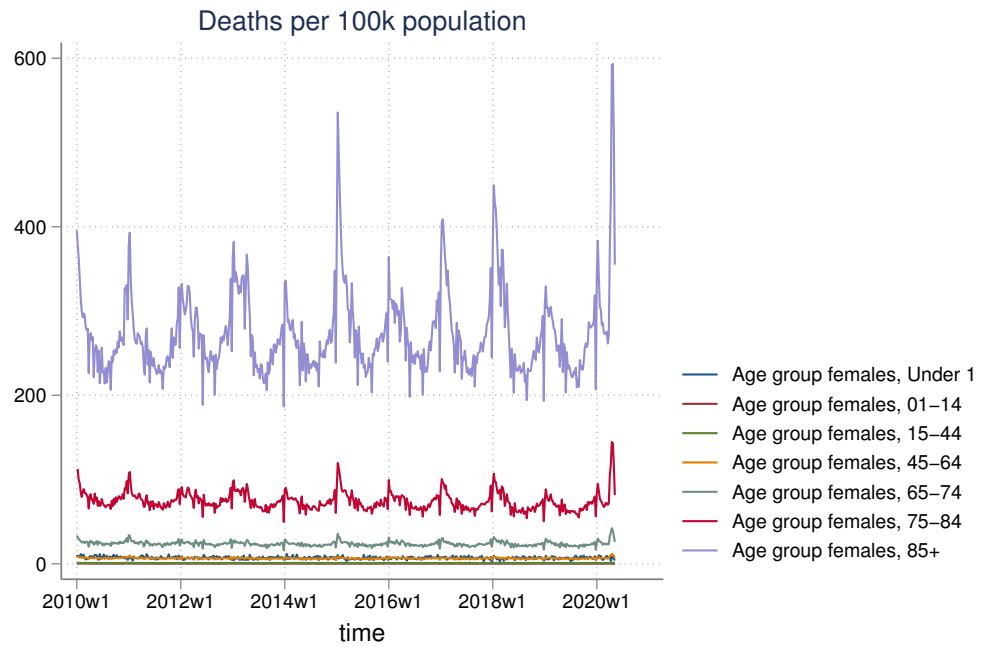

Figure 242: Female age group mortality time trends, fm 2019 wk1

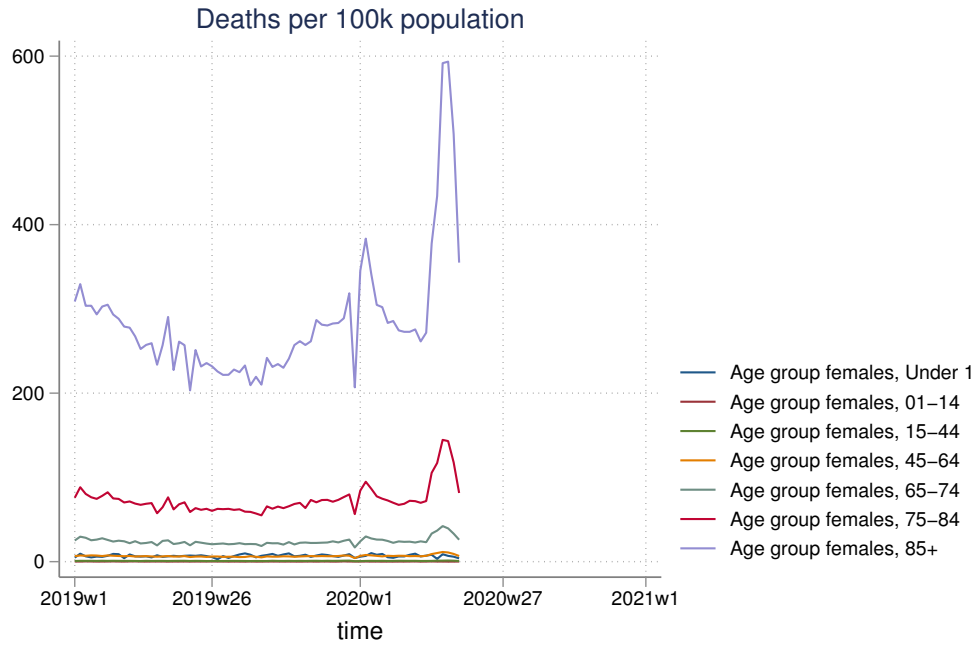

Figure 243: Female age group mortality time trends, fm 2020 wk1

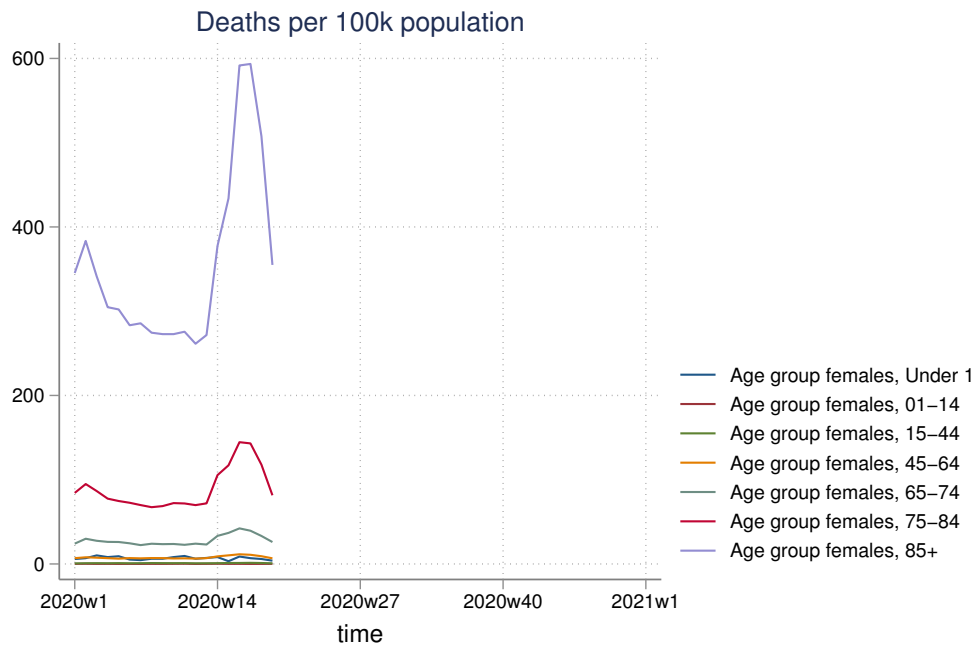



## 5.2 Females aged under 1

Figure 244: Females < 1 mortality time trend and model, fm 2010 wk1

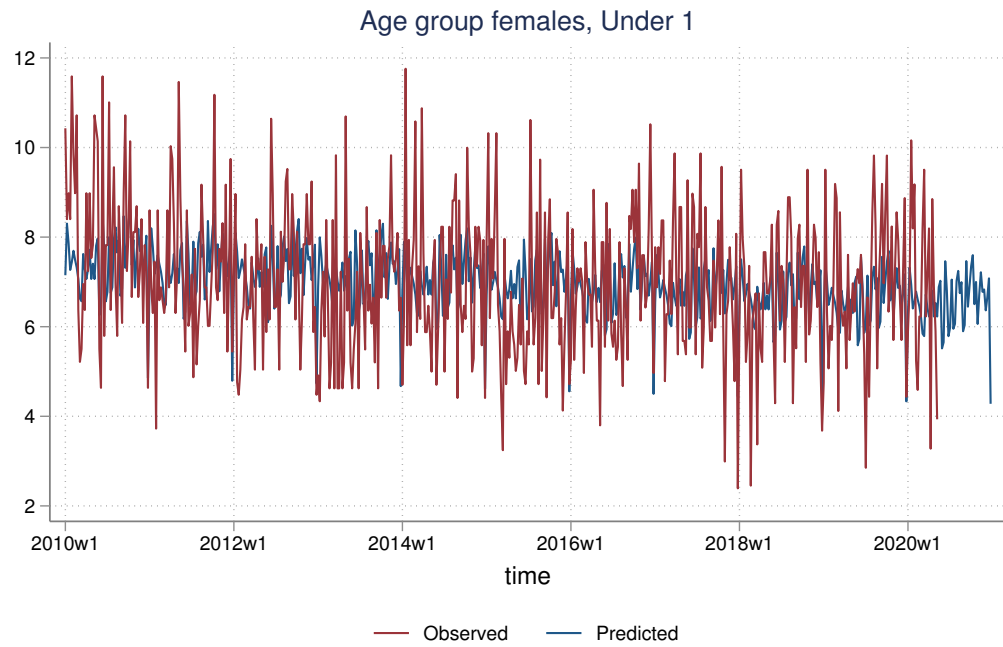

Figure 245: Females < 1 mortality time trend and model, fm 2019 wk1

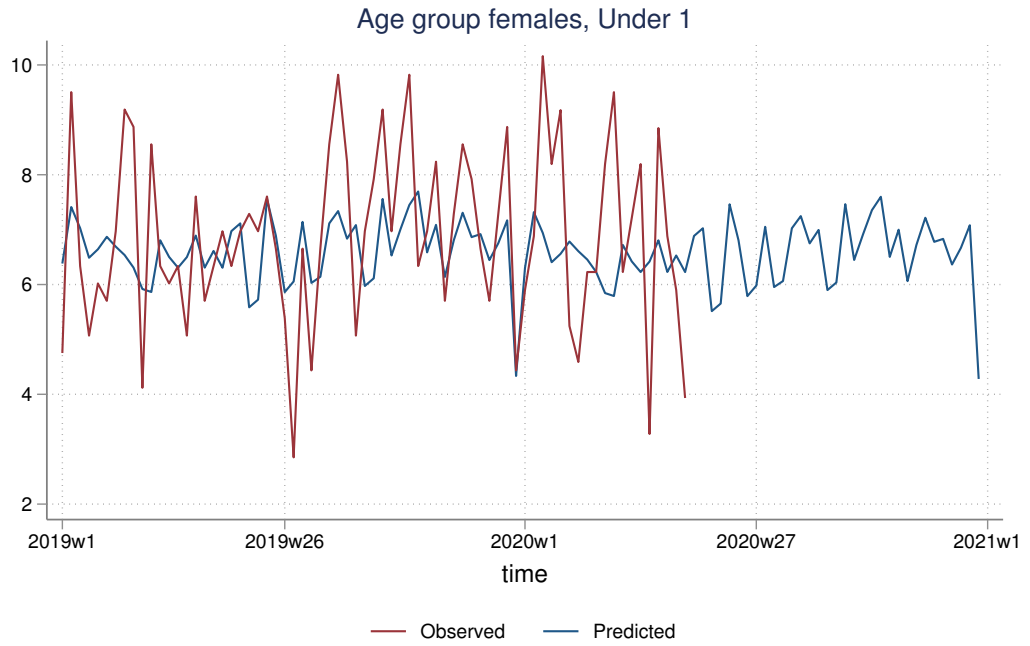

Figure 246: Females < 1 mortality time trend and model, fm 2020 wk1

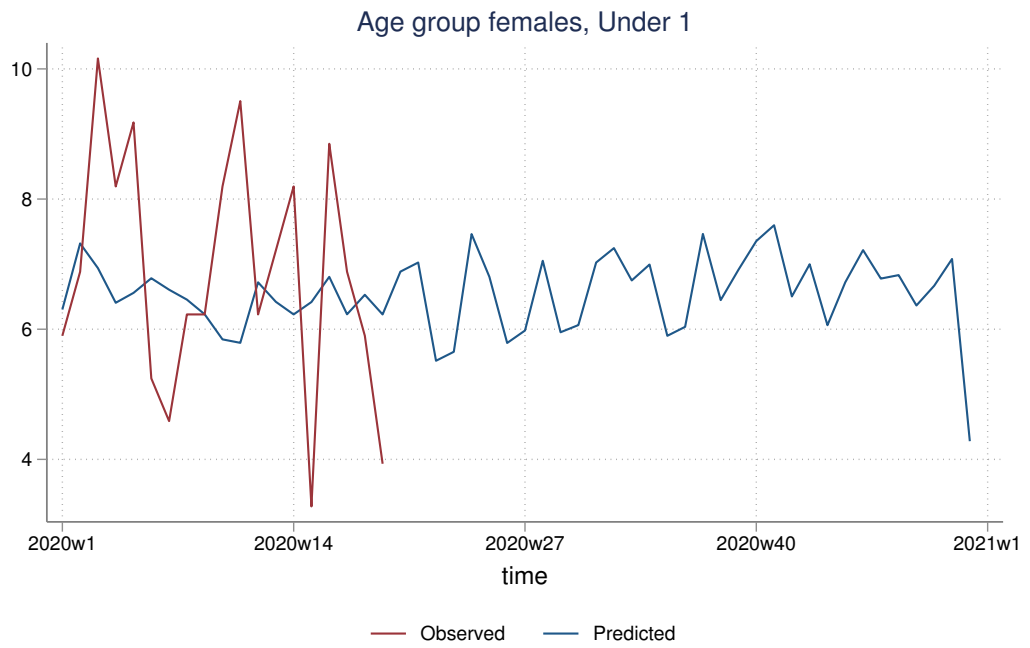

Figure 247: Females < 1 all-cause excess deaths, fm 2010 wk1

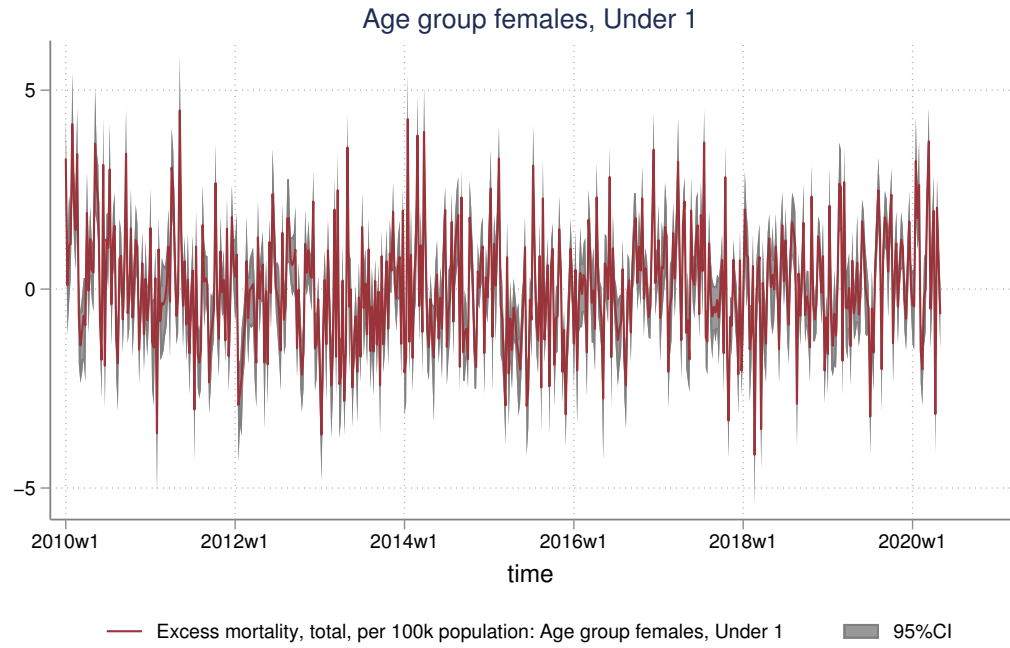

Figure 248: Females < 1 all-cause excess deaths, fm 2019 wk1

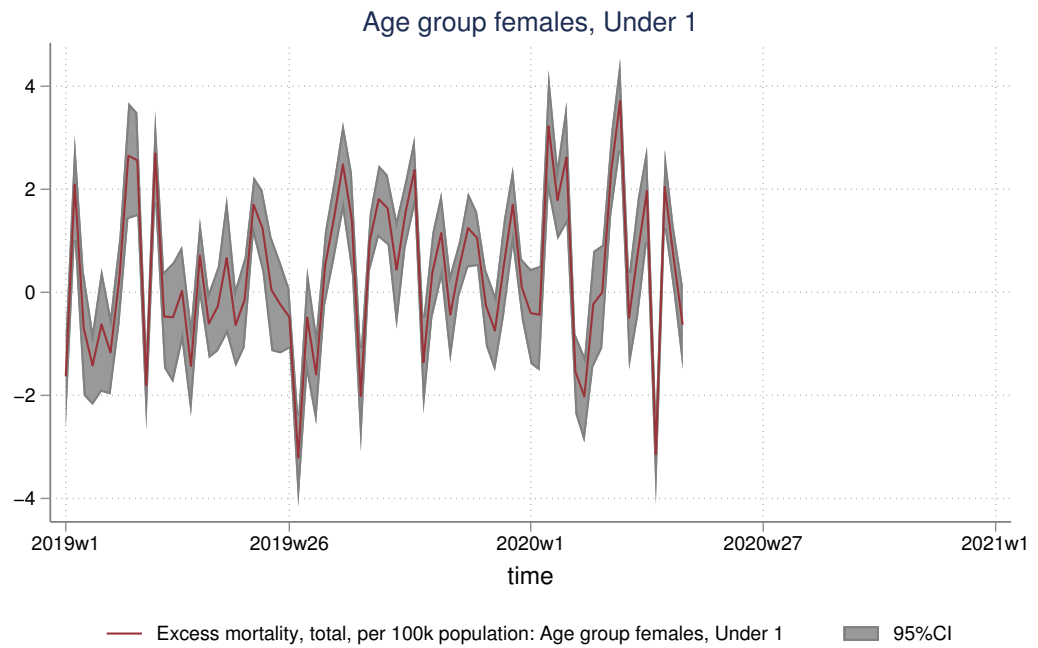

Figure 249: Females < 1 all-cause excess deaths, fm 2020 wk1

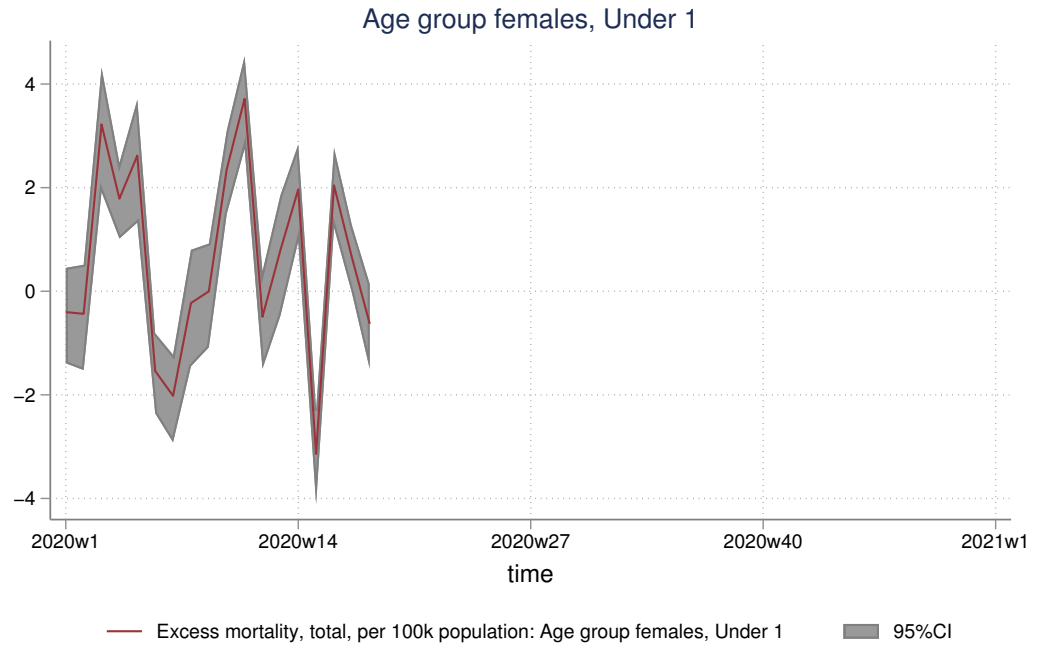

Figure 250: Females < 1 all-cause excess deaths minus COVID19, fm 2010 wk1

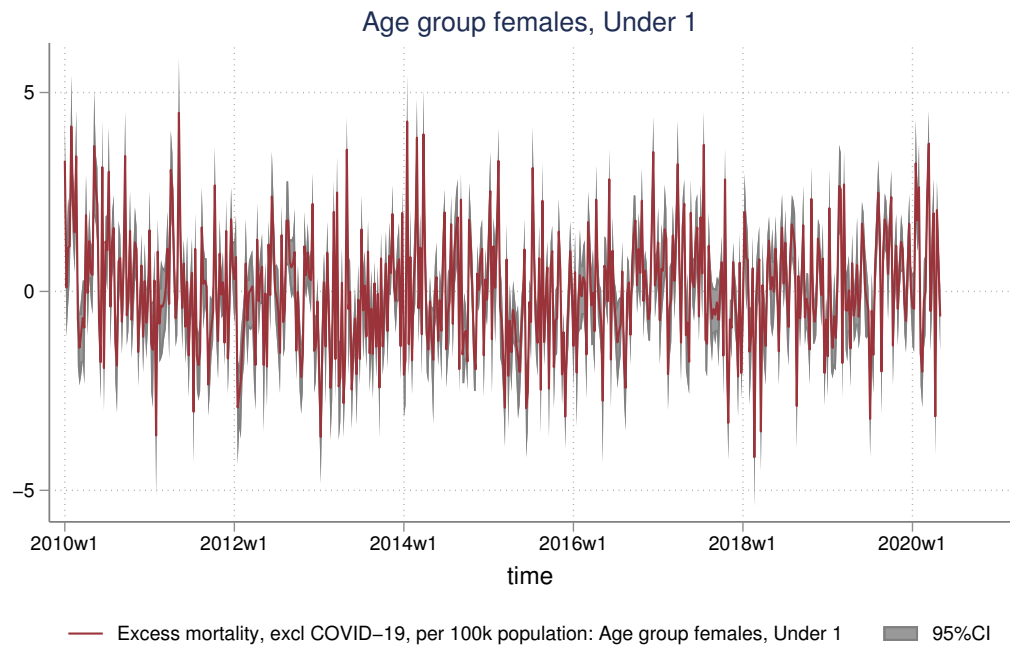

Figure 251: Females < 1 all-cause excess deaths minus COVID19, fm 2019 wk1

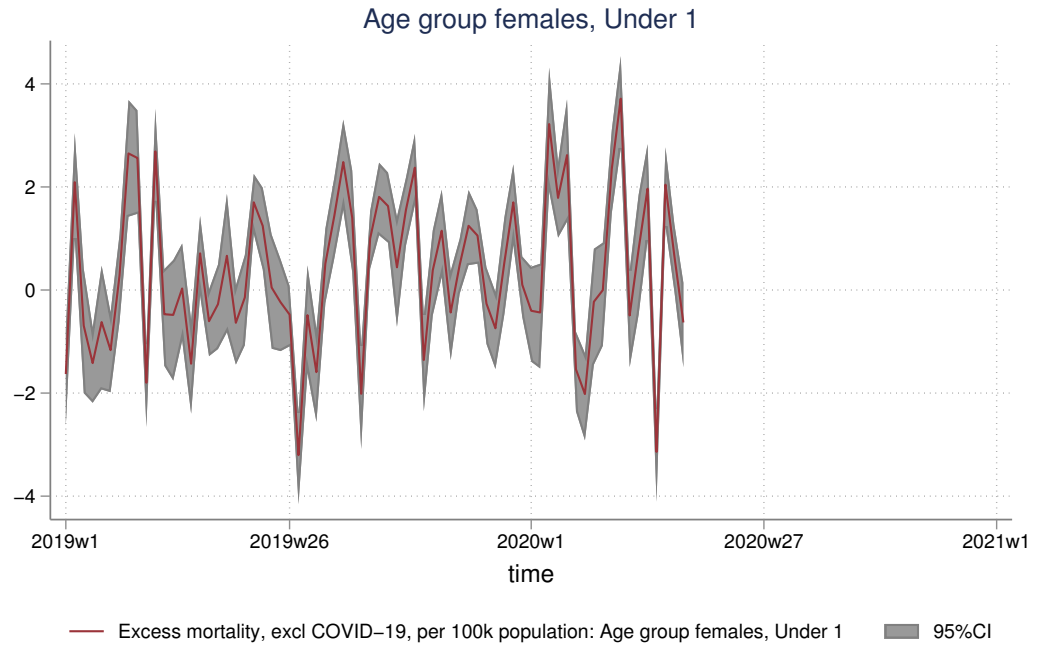

Figure 252: Females < 1 all-cause excess deaths minus COVID19, fm 2020 wk1

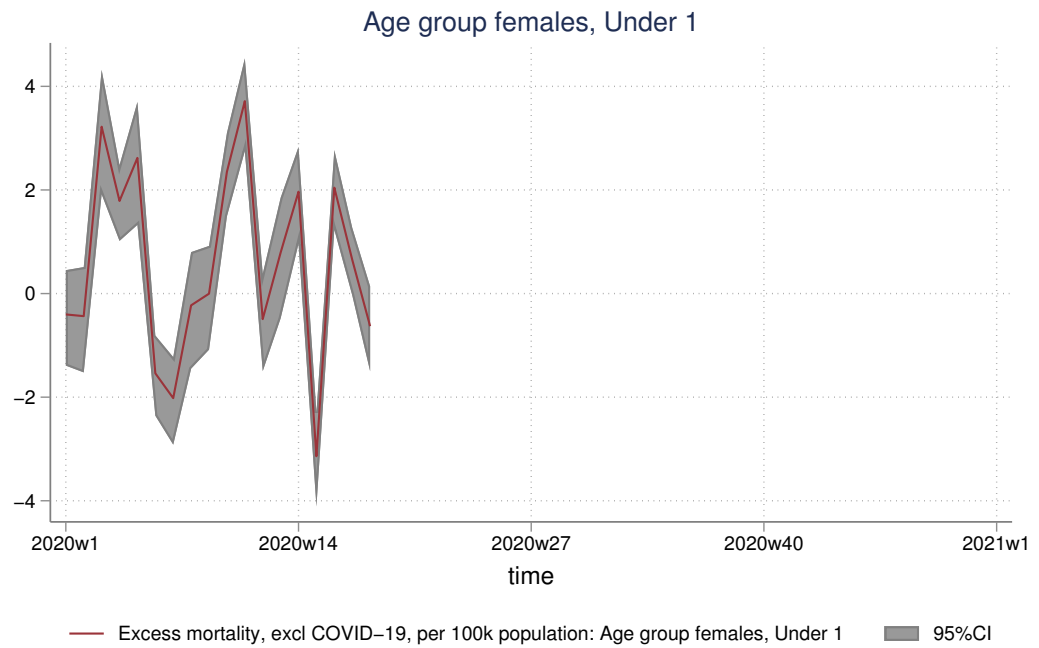

### 5.3 Females aged 01-14

Figure 253: Females 01-14 mortality time trend and model, fm 2010 wk1

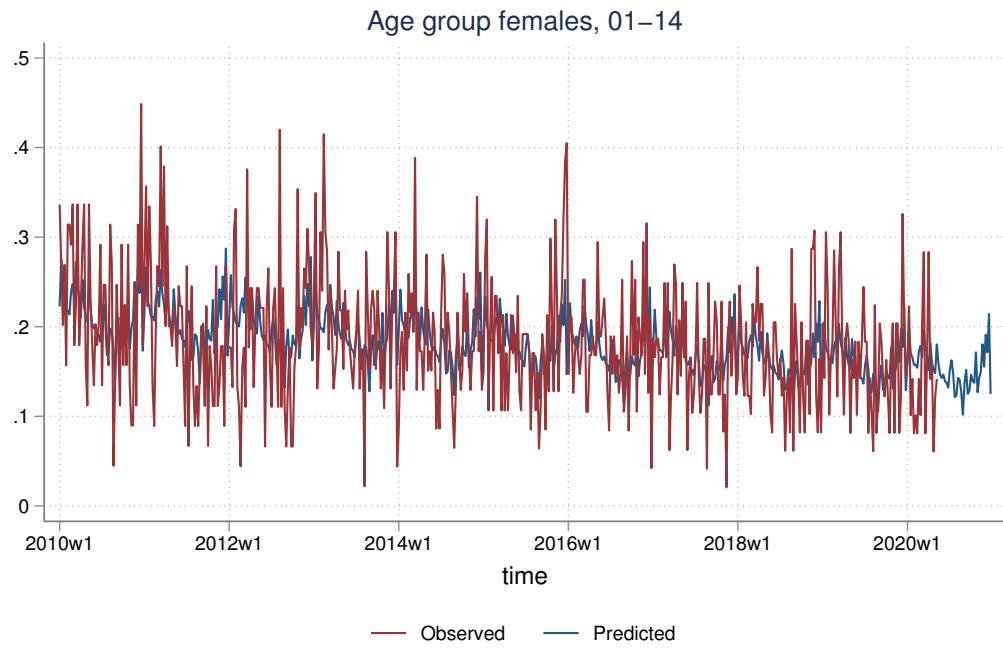

Figure 254: Females 01-14 mortality time trend and model, fm 2019 wk1

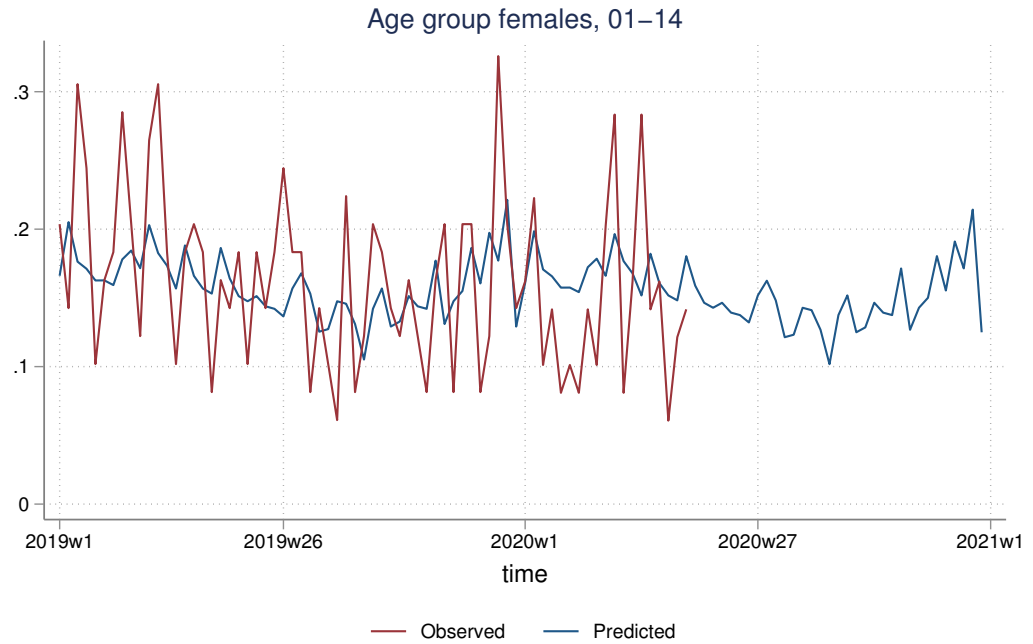

Figure 255: Females 01-14 mortality time trend and model, fm 2020 wk1

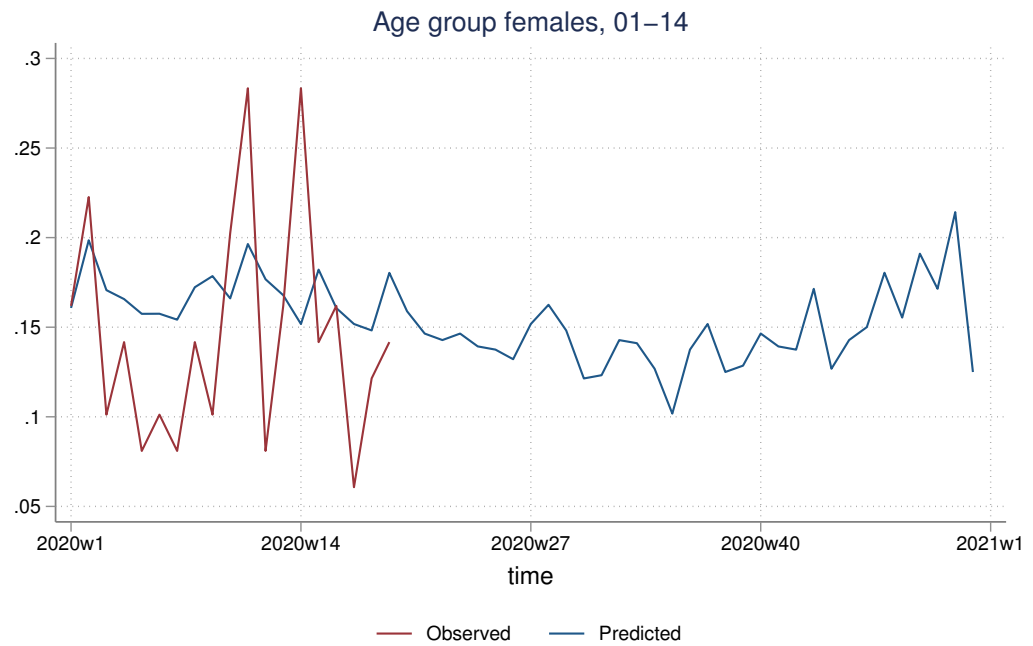

Figure 256: Females 01-14 all-cause excess deaths, fm 2010 wk1

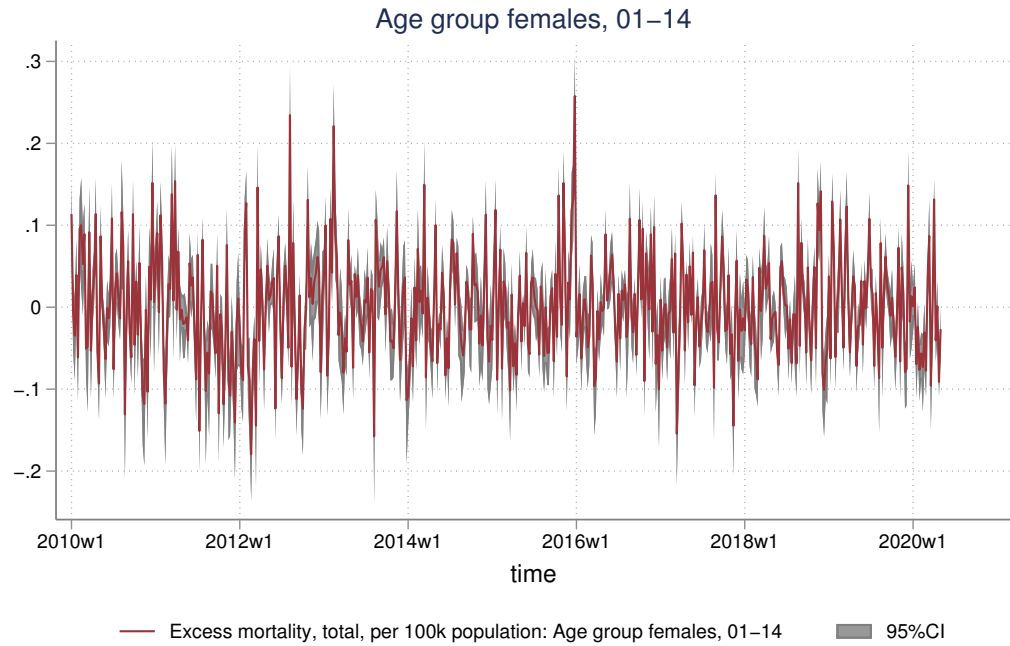

Figure 257: Females 01-14 all-cause excess deaths, fm 2019 wk1

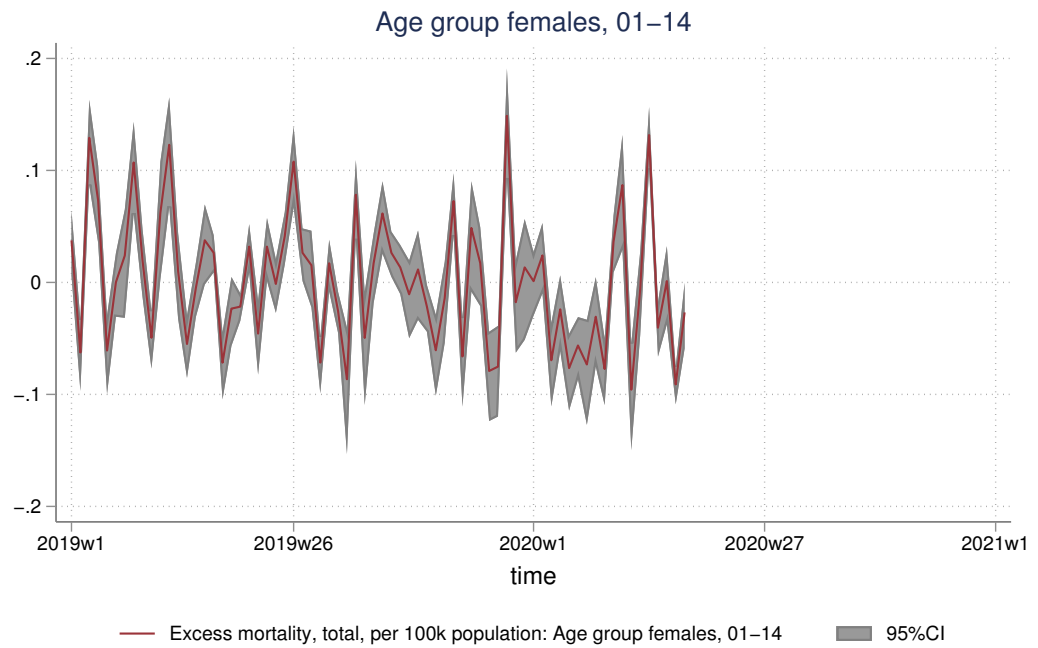



Figure 258: Females 01-14 all-cause excess deaths, fm 2020 wk1

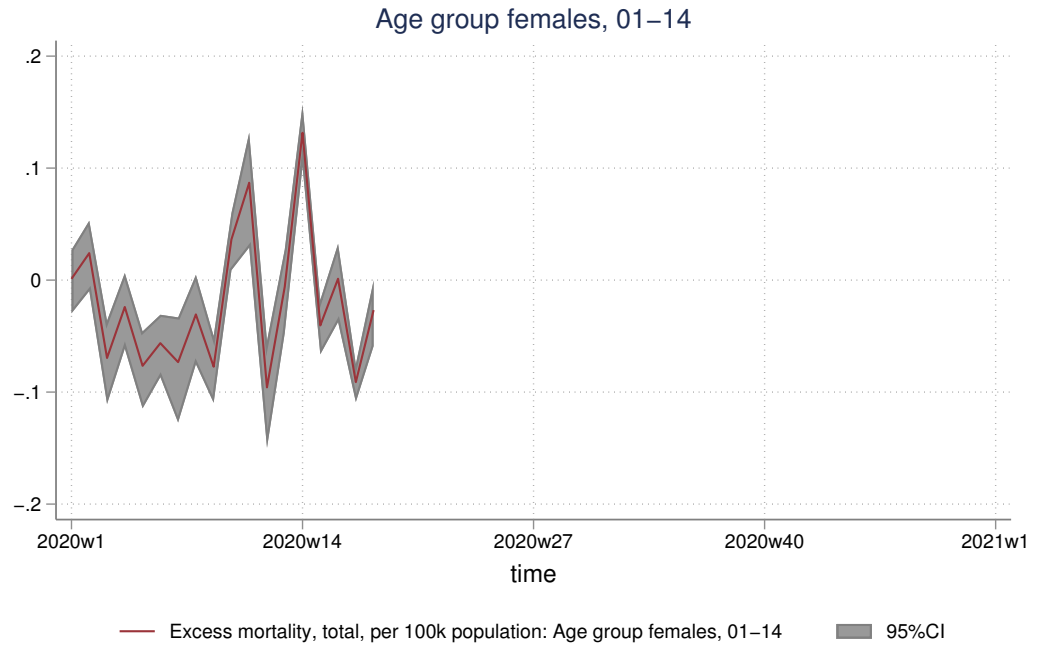

Figure 259: Females 01-14 all-cause excess deaths (-COVID19), fm 2010 wk1

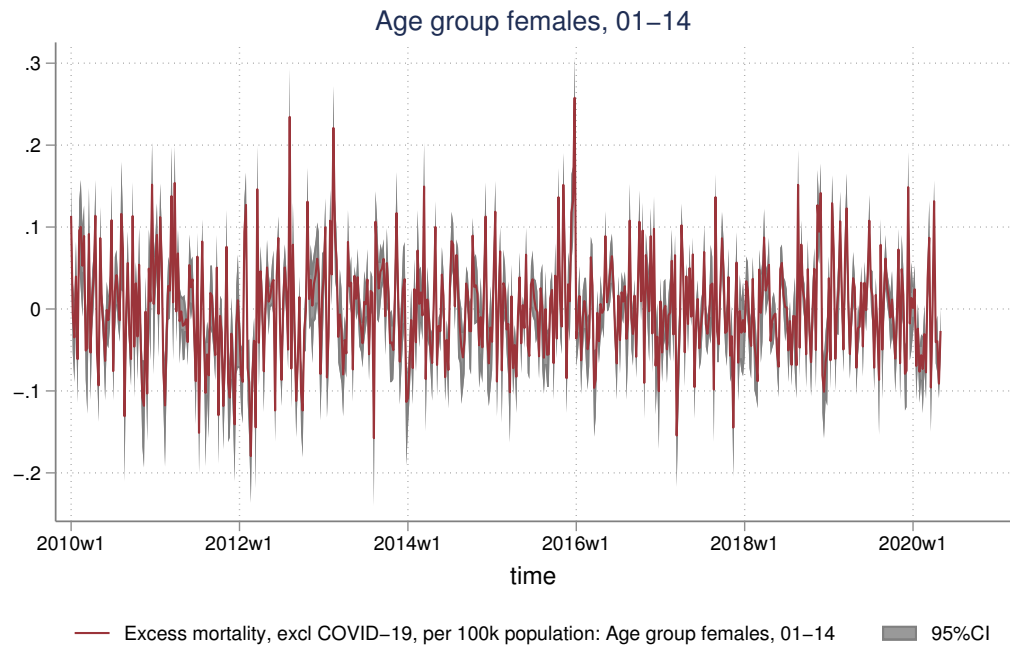

Figure 260: Females 01-14 all-cause excess deaths (-COVID19), fm 2019 wk1

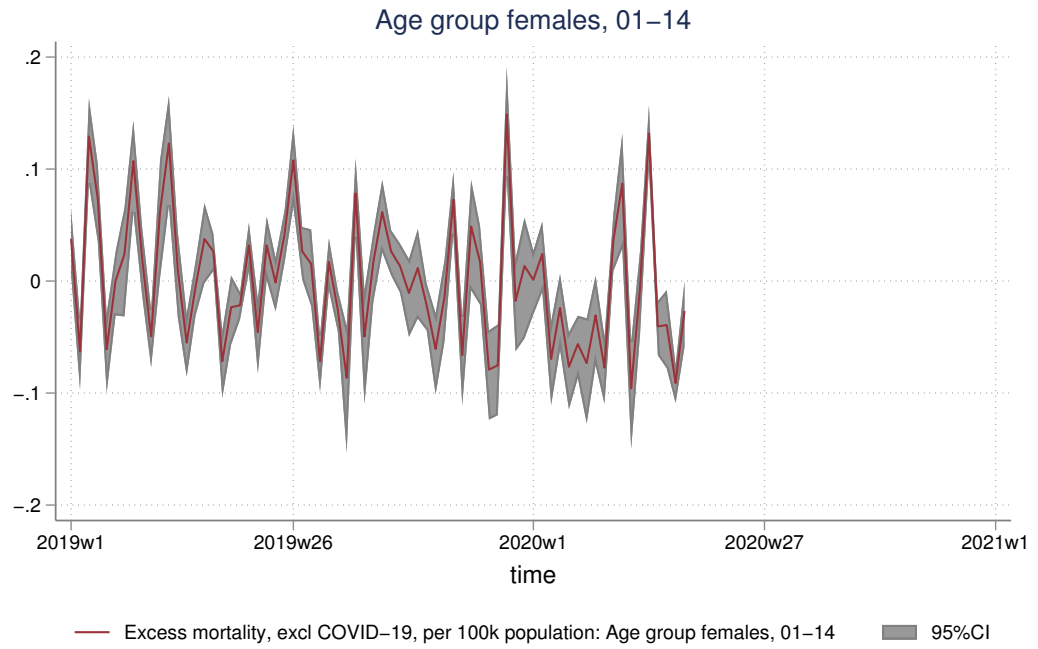

Figure 261: Females 01-14 all-cause excess deaths (-COVID19), fm 2020 wk1

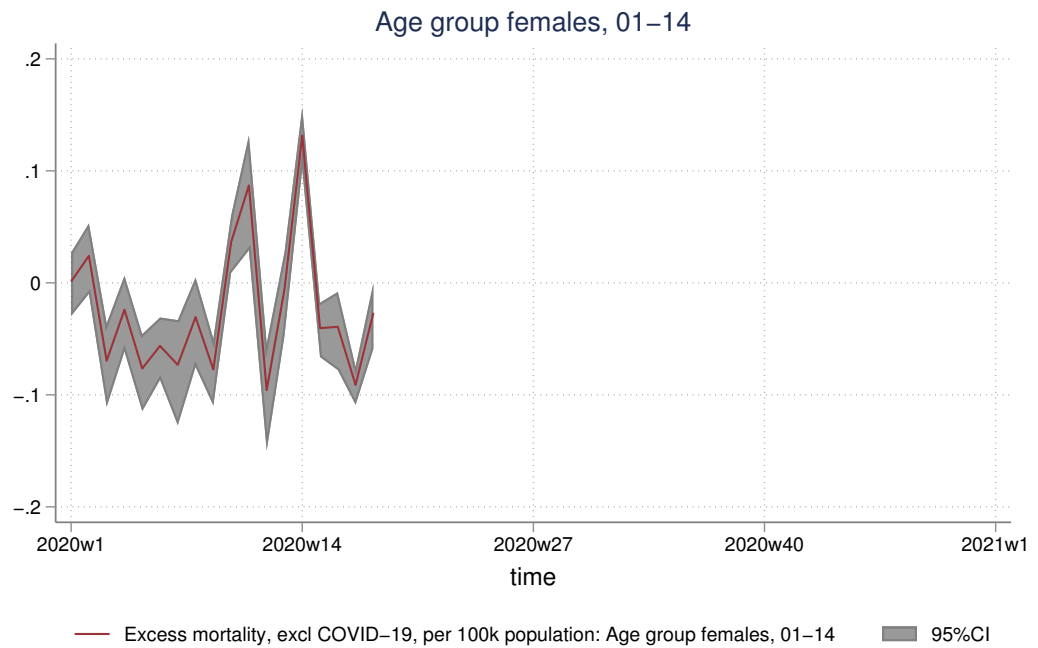

## 5.4 Females aged 15-44

Figure 262: Females 15-44 mortality time trend and model, fm 2010 wk1

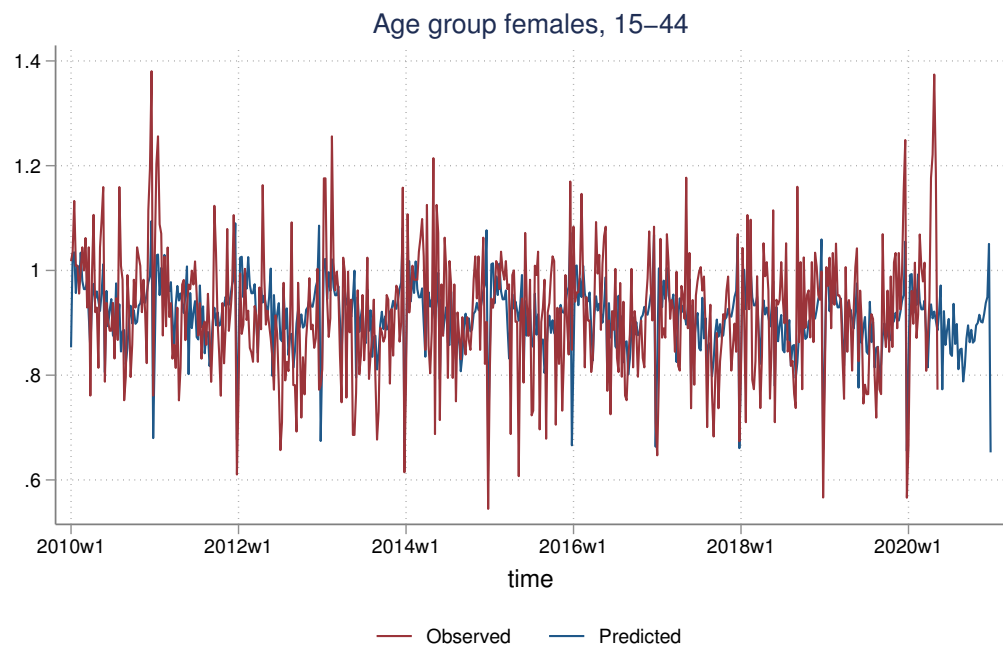

Figure 263: Females 15-44 mortality time trend and model, fm 2019 wk1

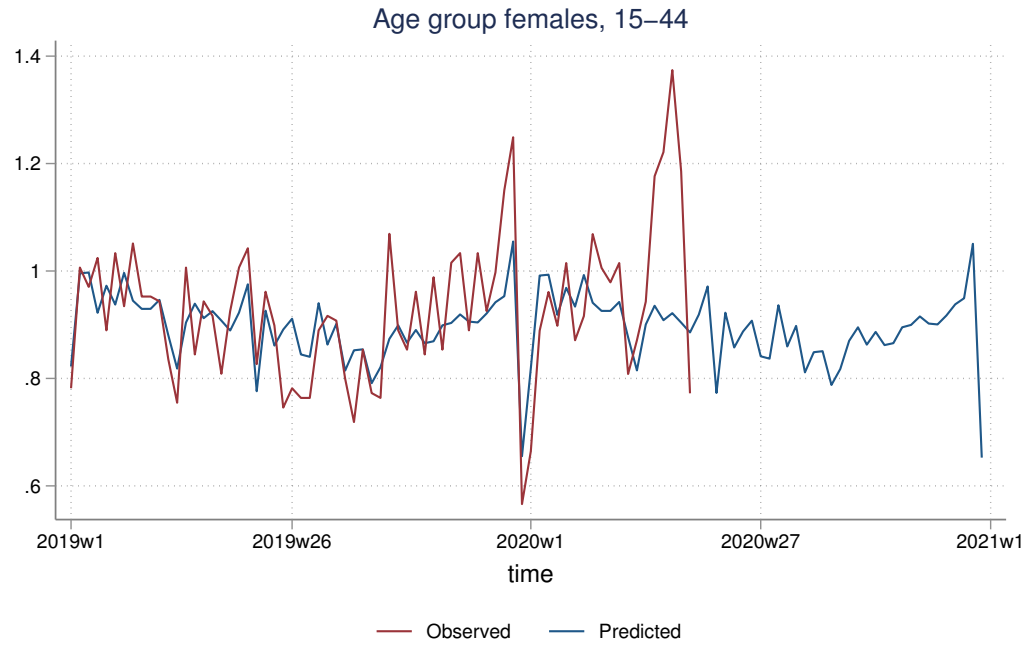

Figure 264: Females 15-44 mortality time trend and model, fm 2020 wk1

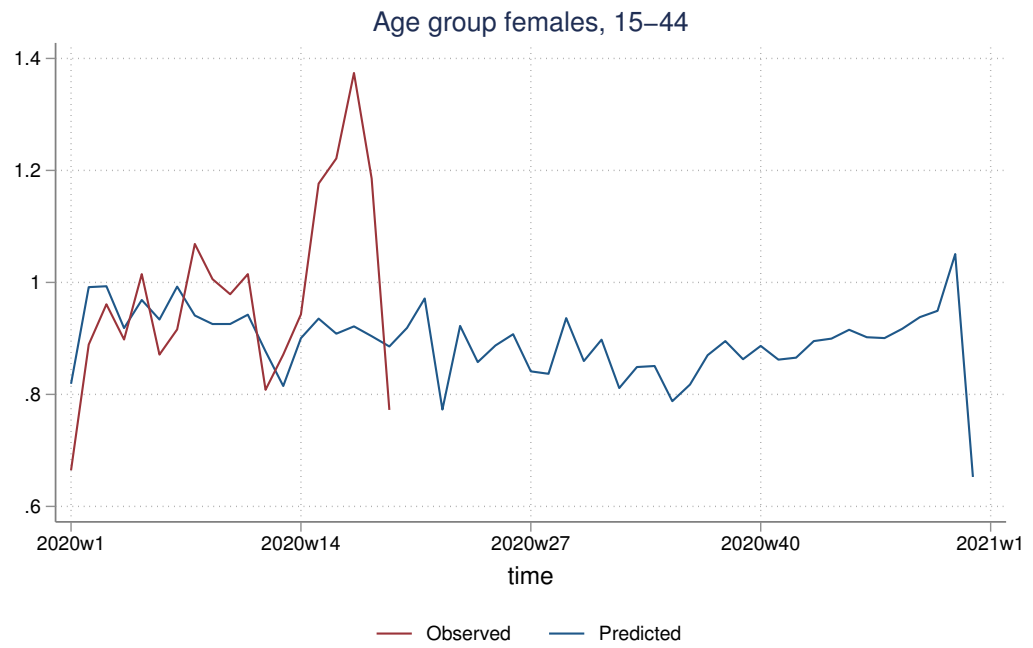

Figure 265: Females 15-44 all-cause excess deaths, fm 2010 wk1

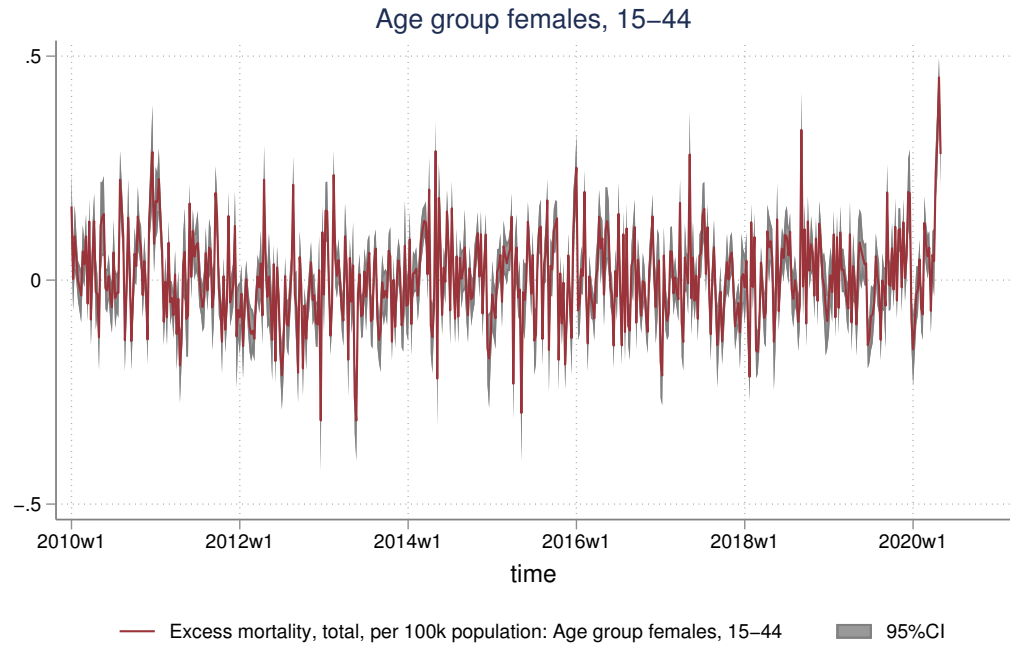

Figure 266: Females 15-44 all-cause excess deaths, fm 2019 wk1

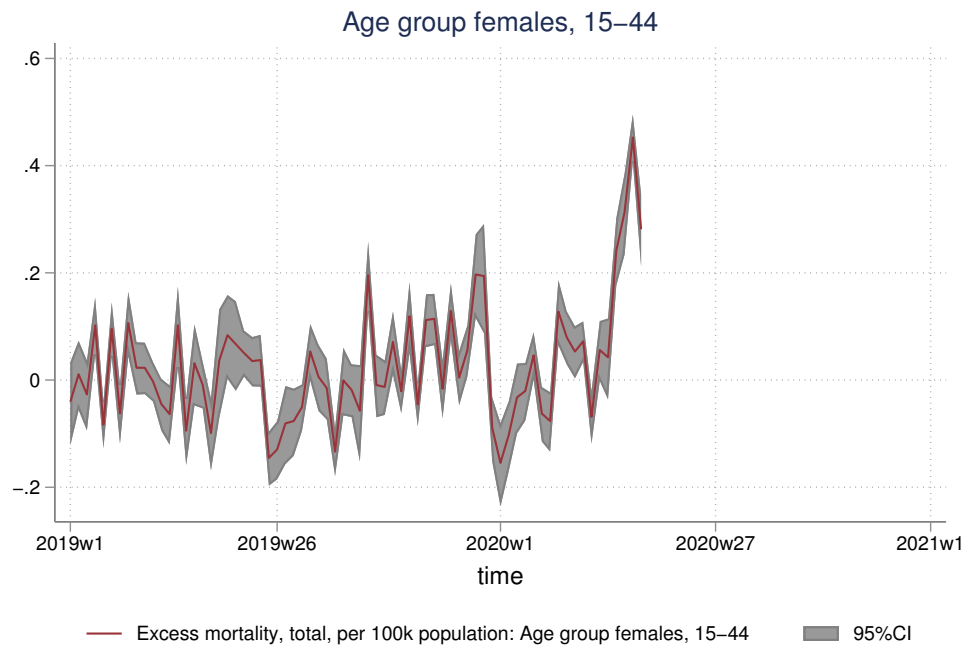

Figure 267: Females 15-44 all-cause excess deaths, fm 2020 wk1

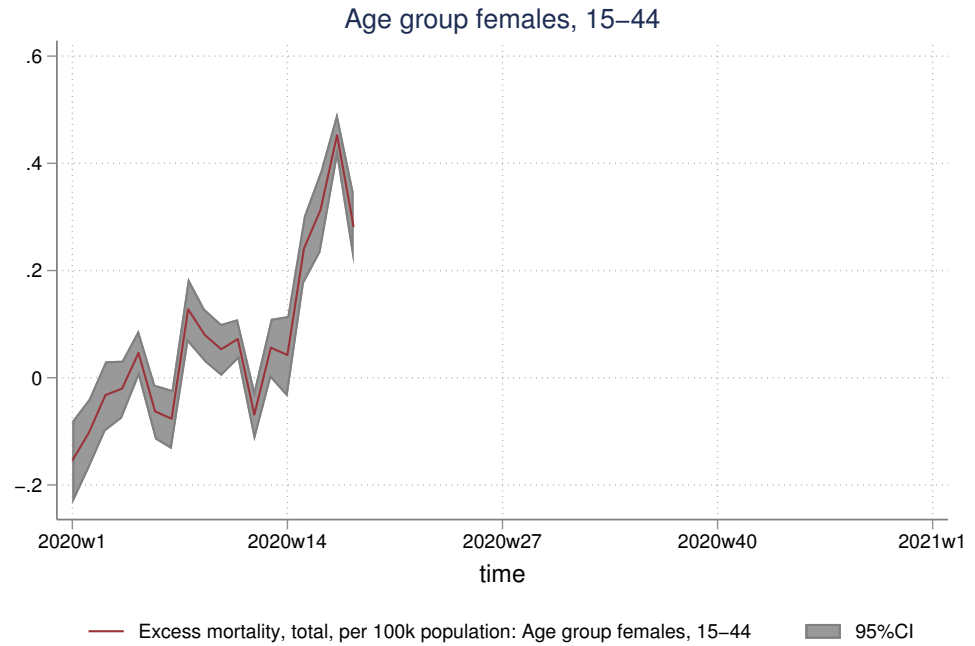

Figure 268: Females 15-44 all-cause excess deaths (-COVID19), fm 2010 wk1

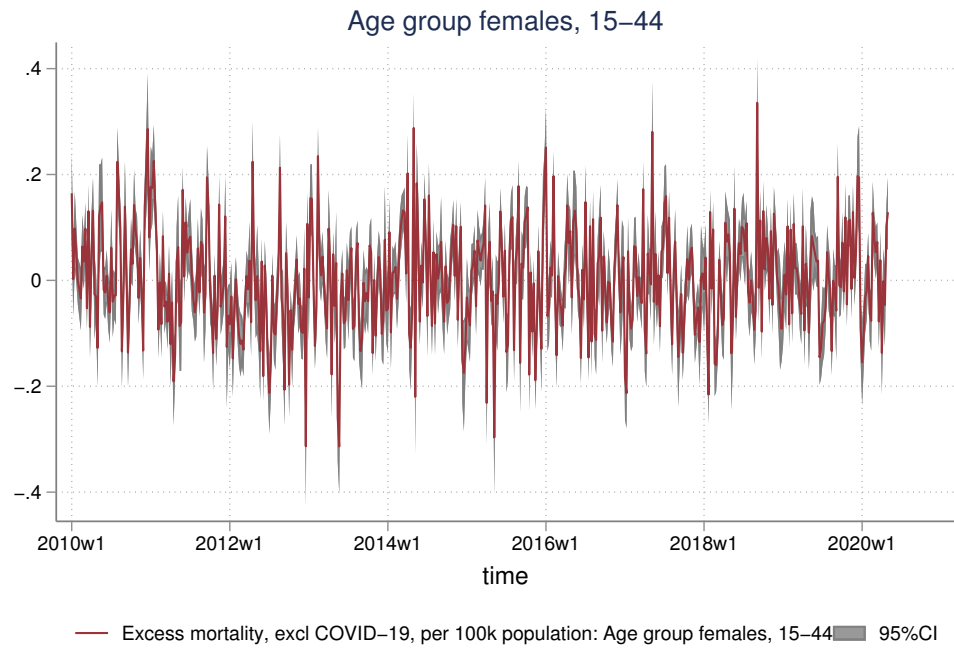

Figure 269: Females 15-44 all-cause excess deaths (-COVID19), fm 2019 wk1

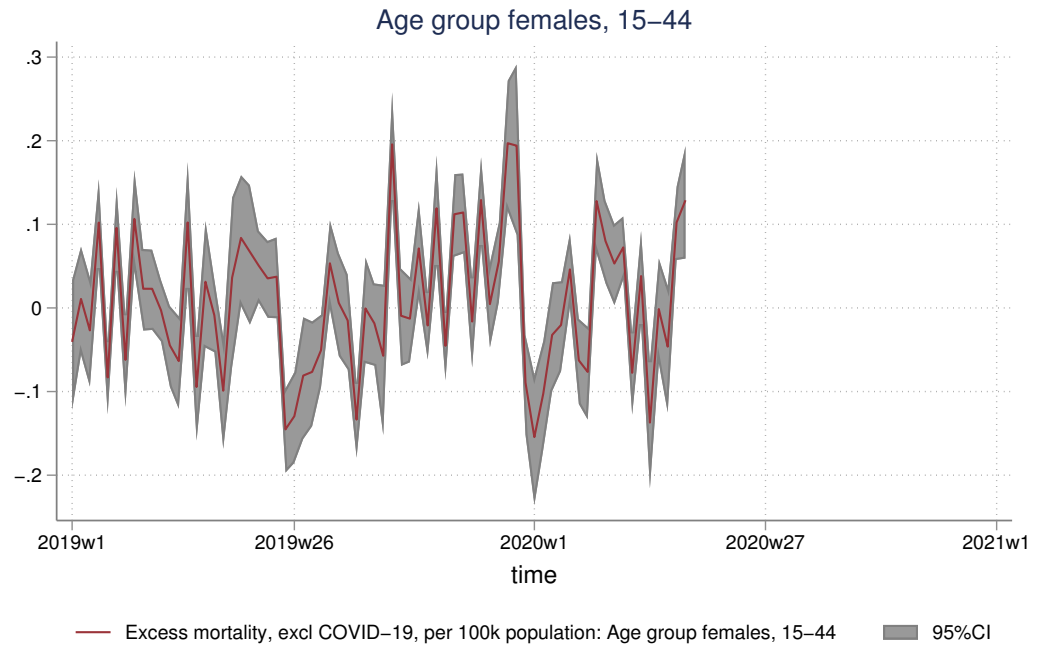

Figure 270: Females 15-44 all-cause excess deaths (-COVID19), fm 2020 wk1

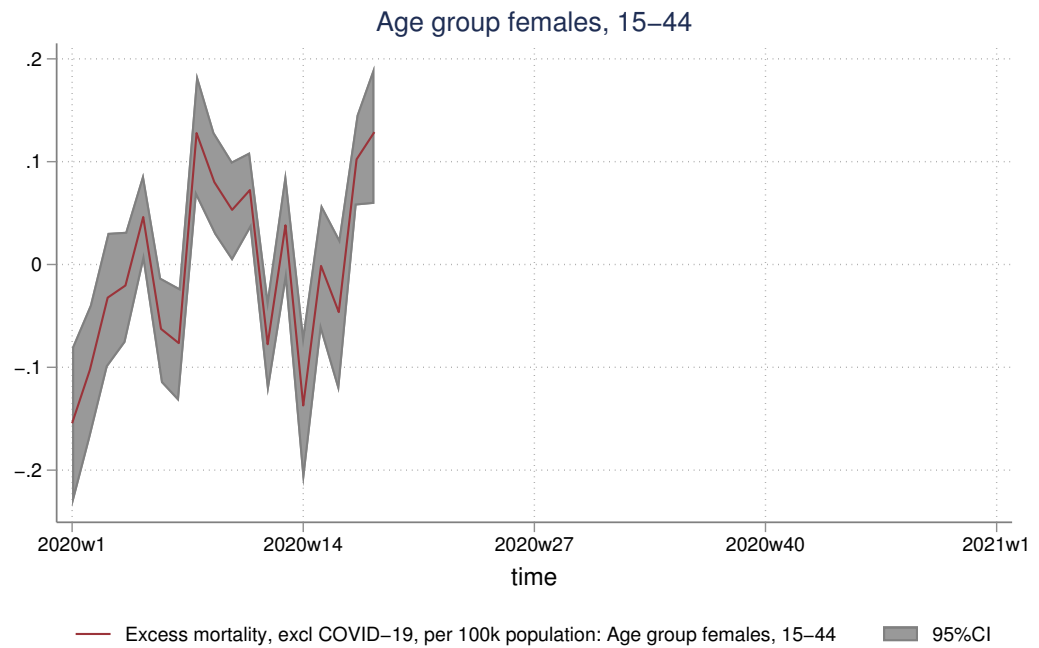

## 5.5 Females aged 45-64

Figure 271: Females 45-64 mortality time trend and model, fm 2010 wk1

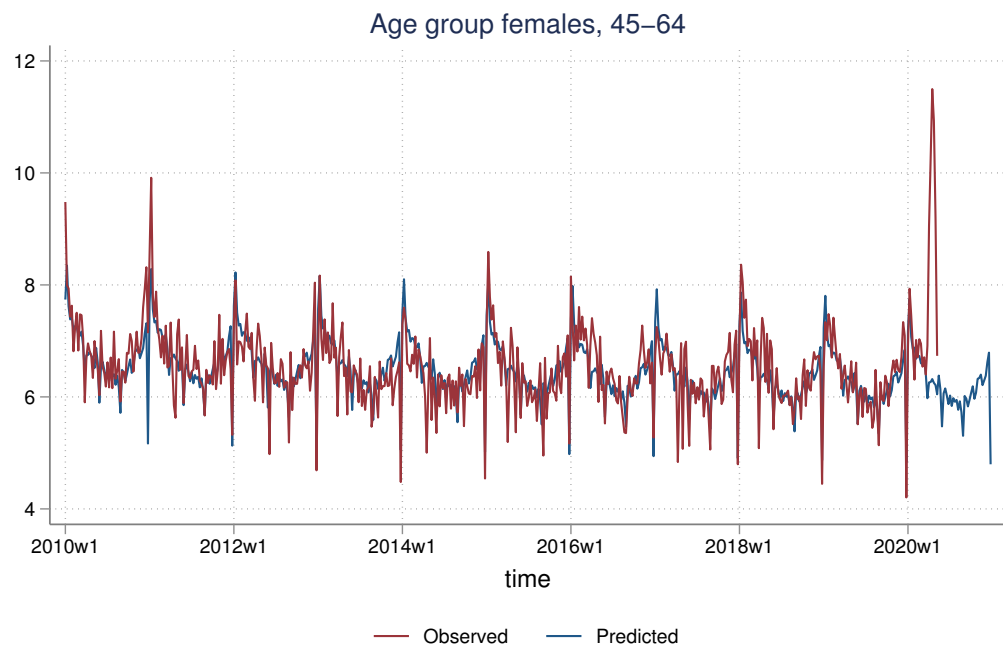



Figure 272: Females 45-64 mortality time trend and model, fm 2019 wk1

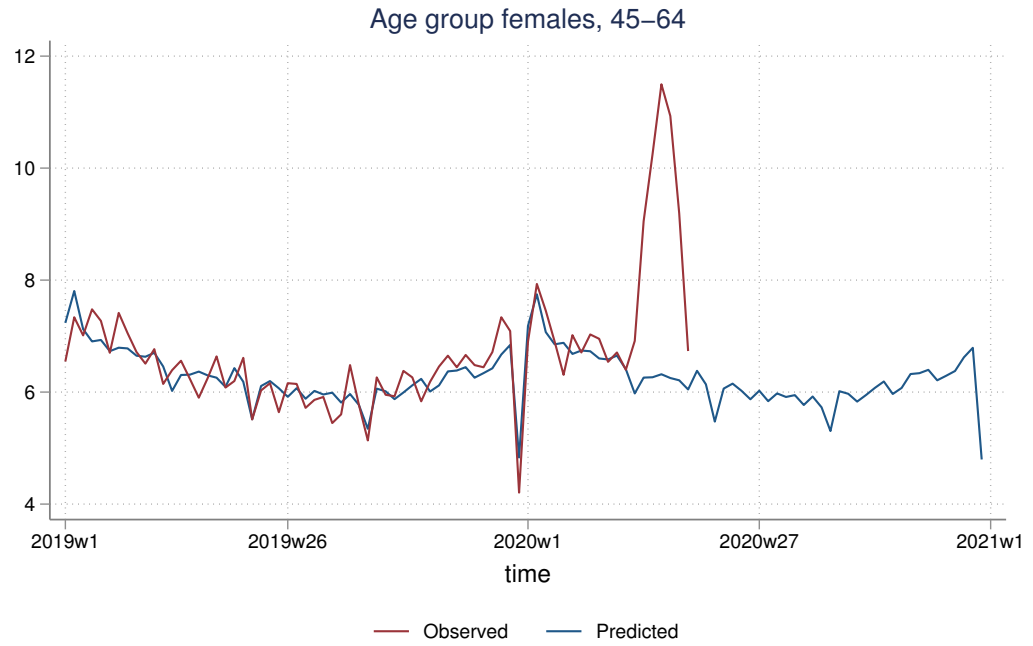

Figure 273: Females 45-64 mortality time trend and model, fm 2020 wk1

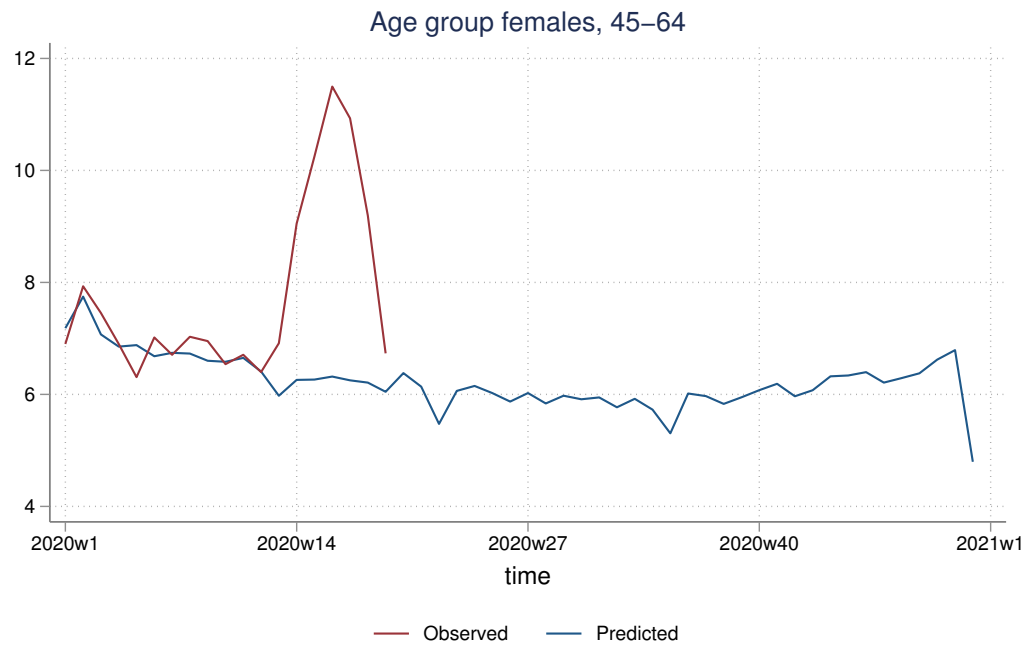

Figure 274: Females 45-64 all-cause excess deaths, fm 2010 wk1

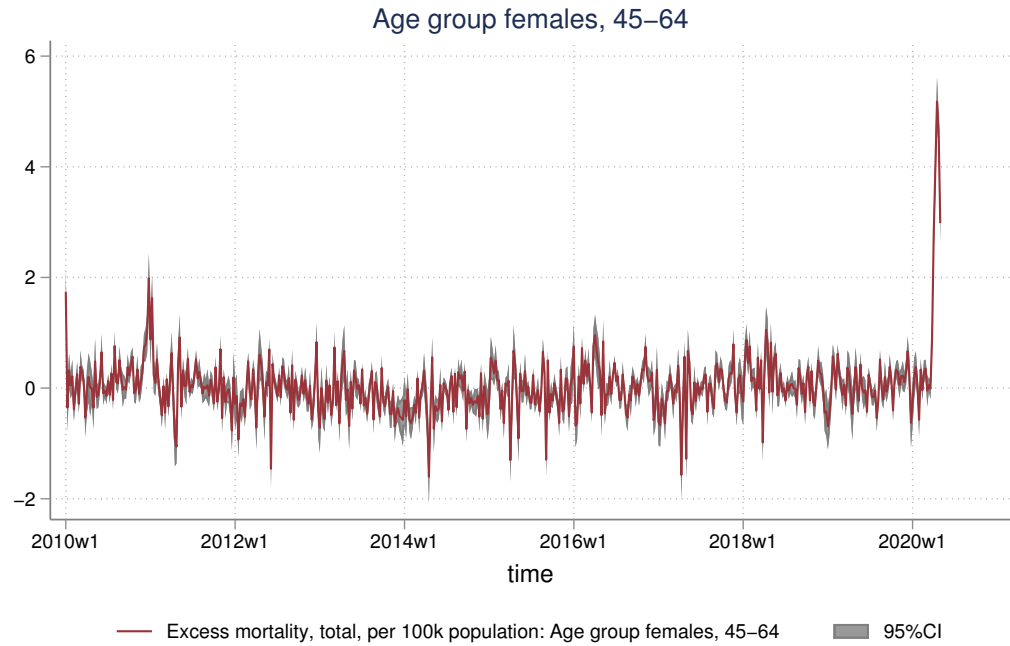

Figure 275: Females 45-64 all-cause excess deaths, fm 2019 wk1

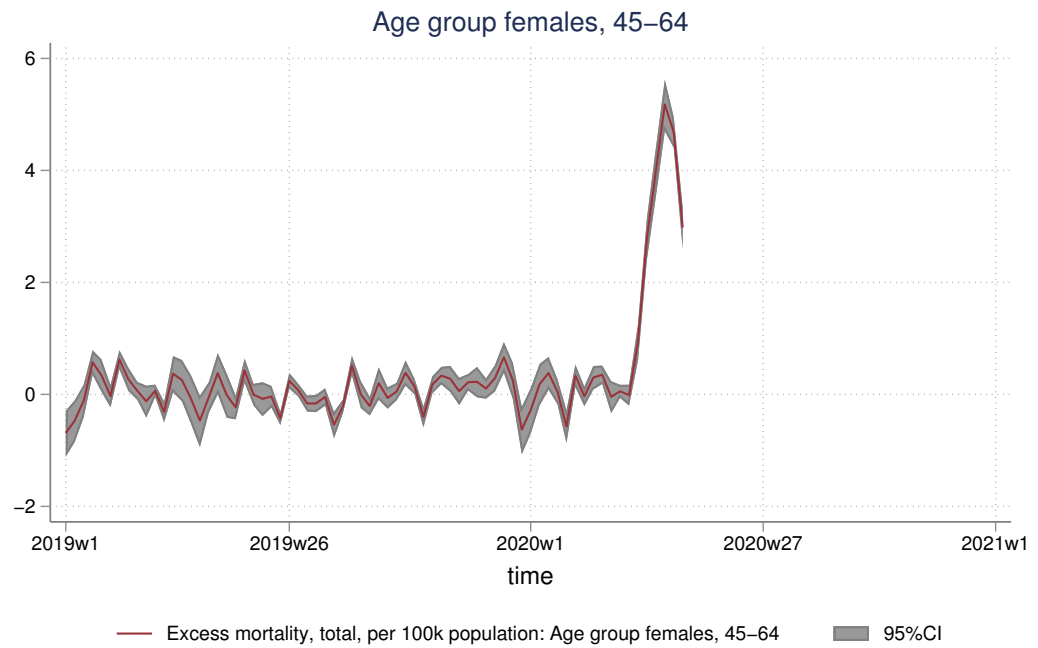



Figure 278: Females 45-64 all-cause excess deaths (-COVID19), fm 2019 wk1

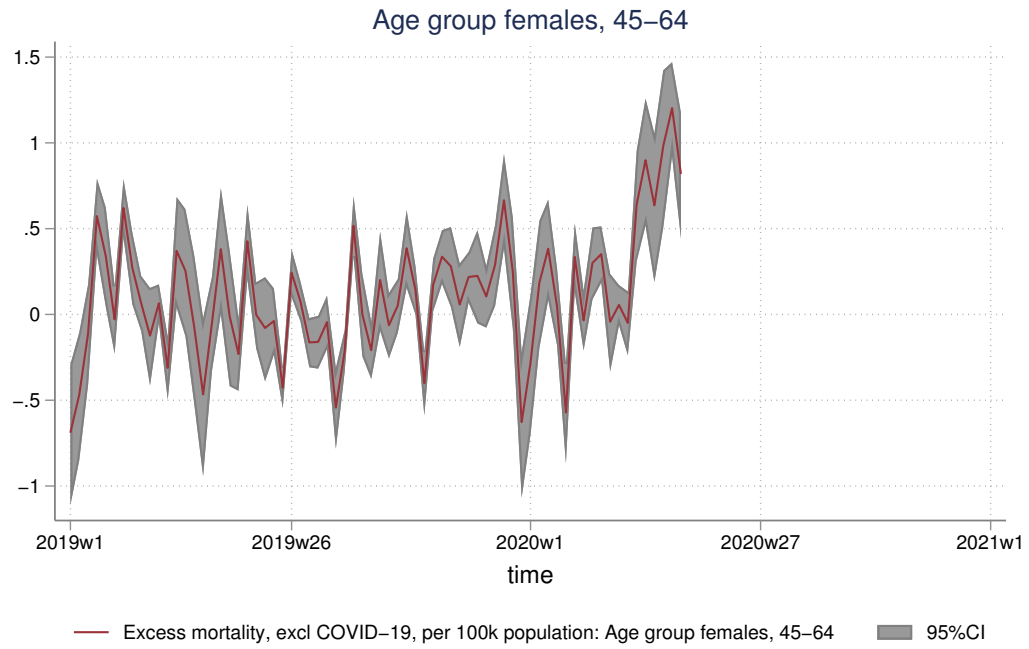

Figure 279: Females 45-64 all-cause excess deaths (-COVID19), fm 2020 wk1

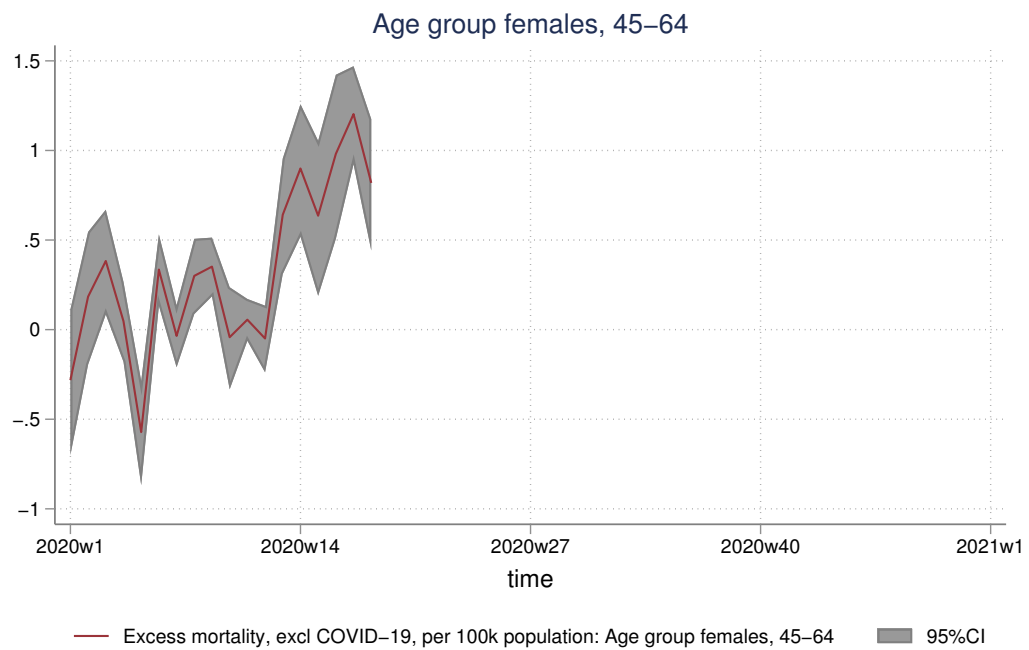

## 5.6 Females aged 65-74

Figure 280: Females 65-74 mortality time trend and model, fm 2010 wk1

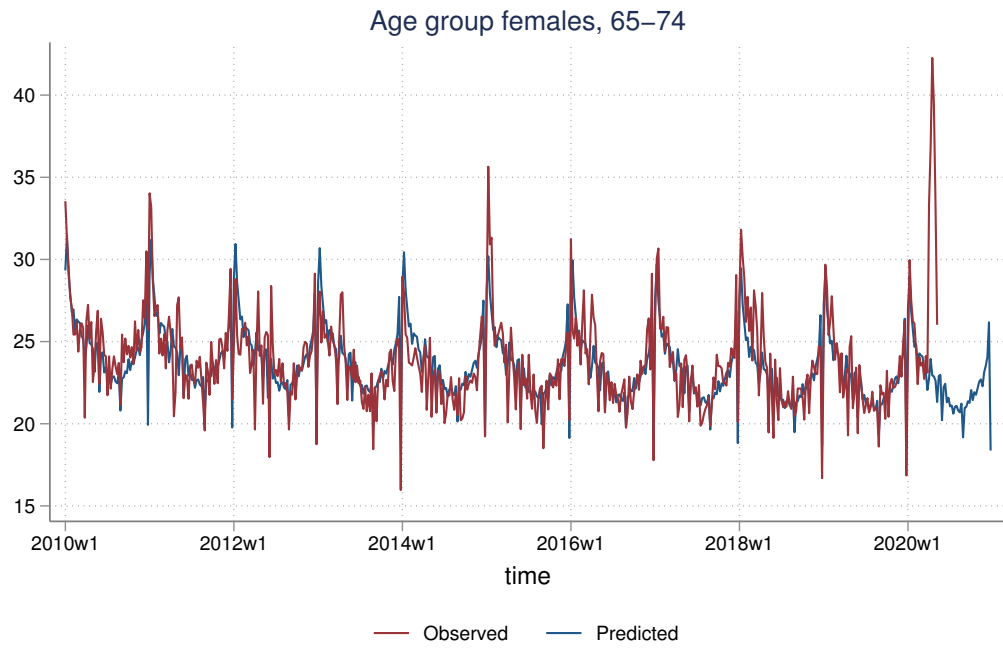

Figure 281: Females 65-74 mortality time trend and model, fm 2019 wk1

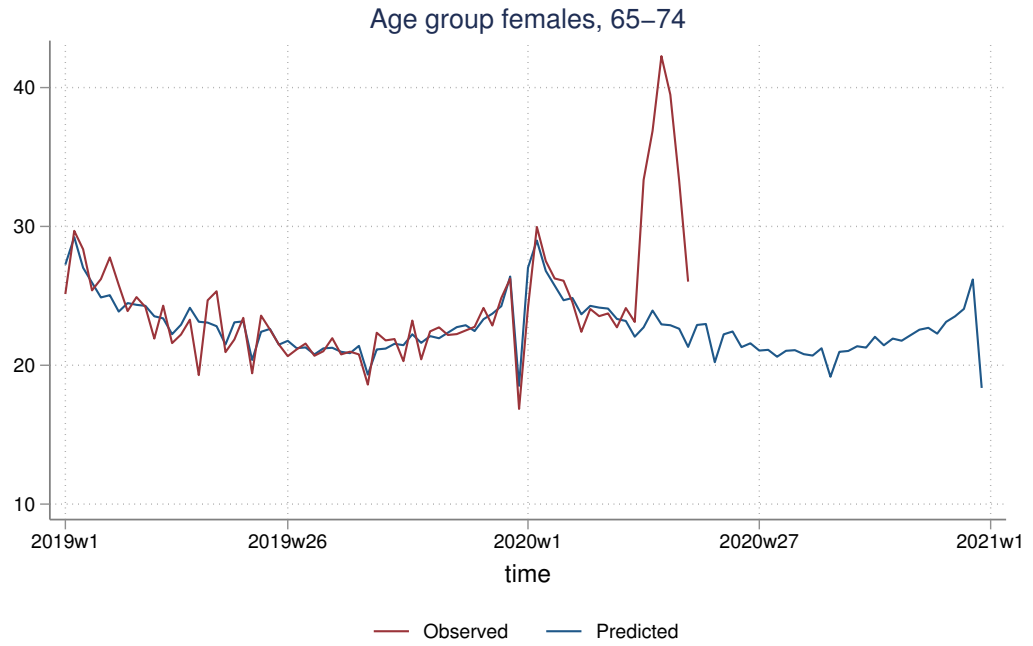

Figure 282: Females 65-74 mortality time trend and model, fm 2020 wk1

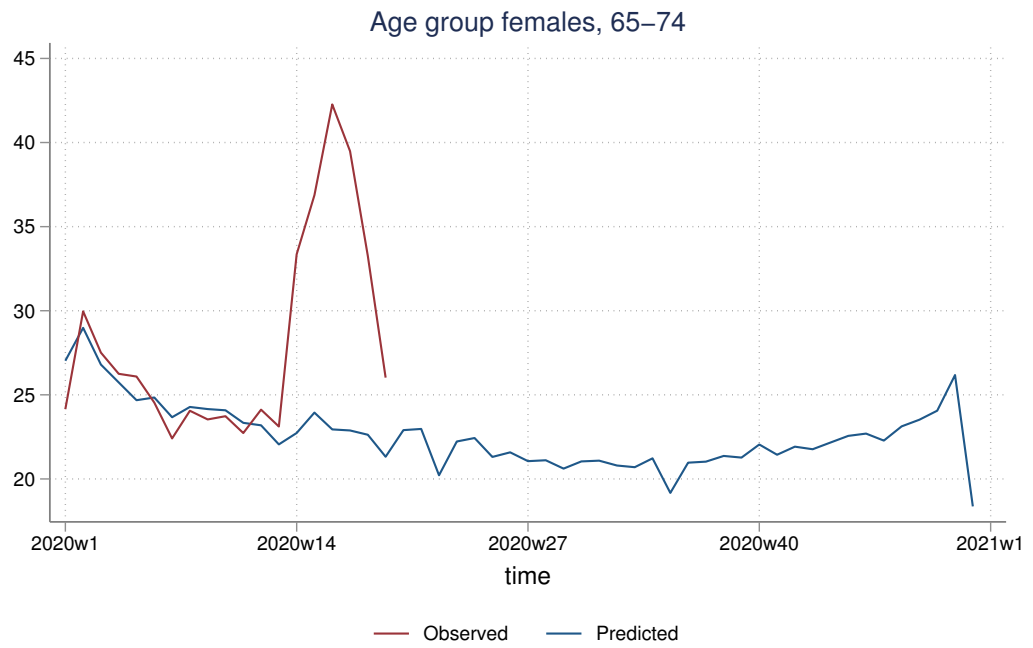

Figure 283: Females 65-74 all-cause excess deaths, fm 2010 wk1

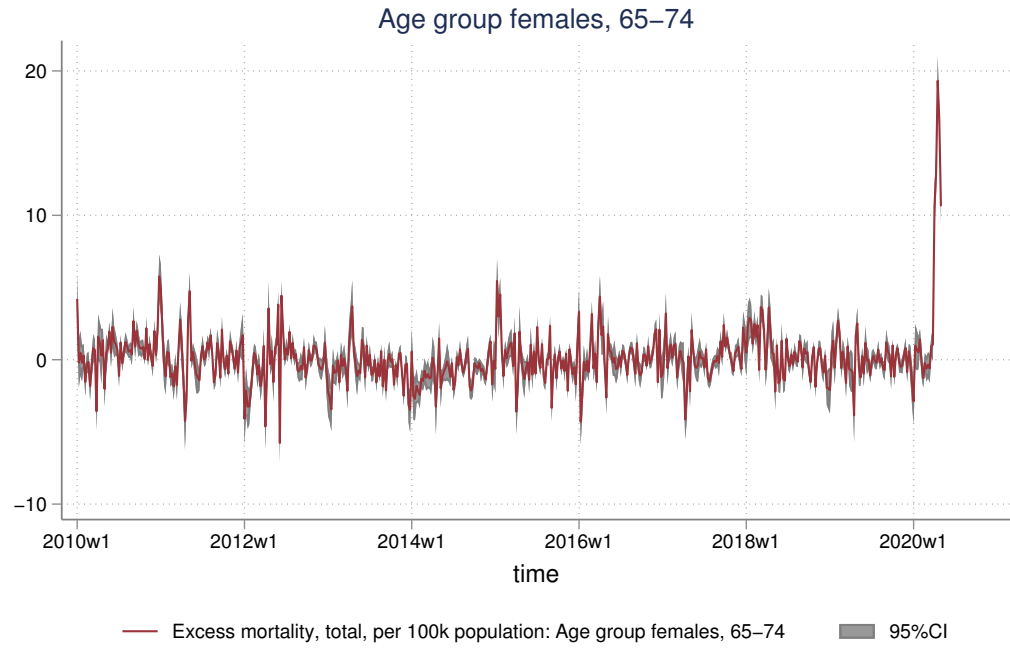

Figure 284: Females 65-74 all-cause excess deaths, fm 2019 wk1

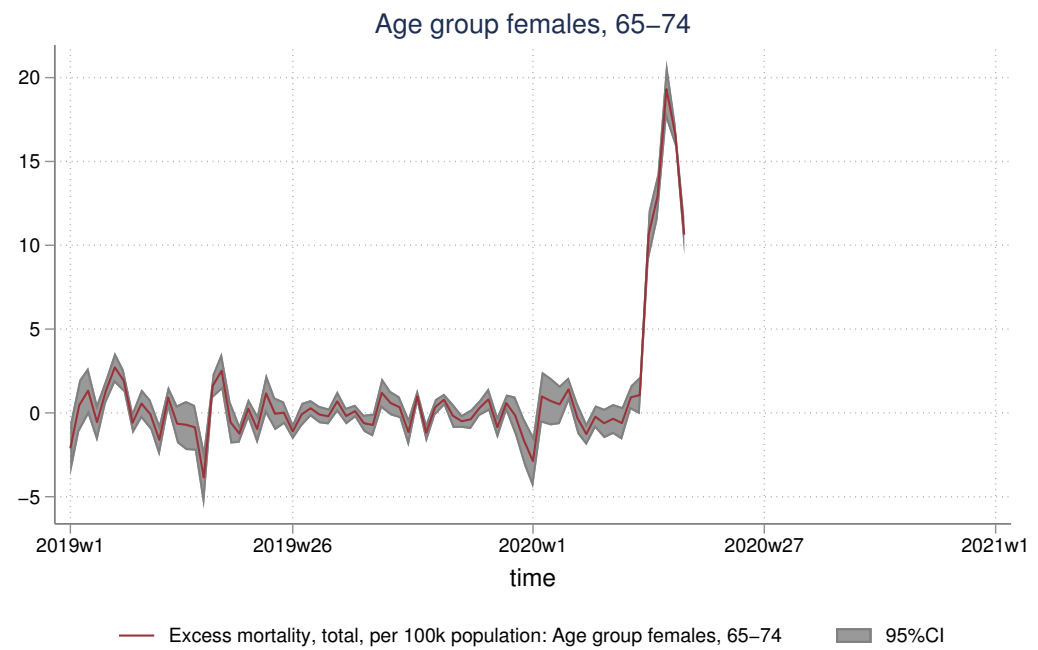





Figure 287: Females 65-74 all-cause excess deaths (-COVID19), fm 2019 wk1

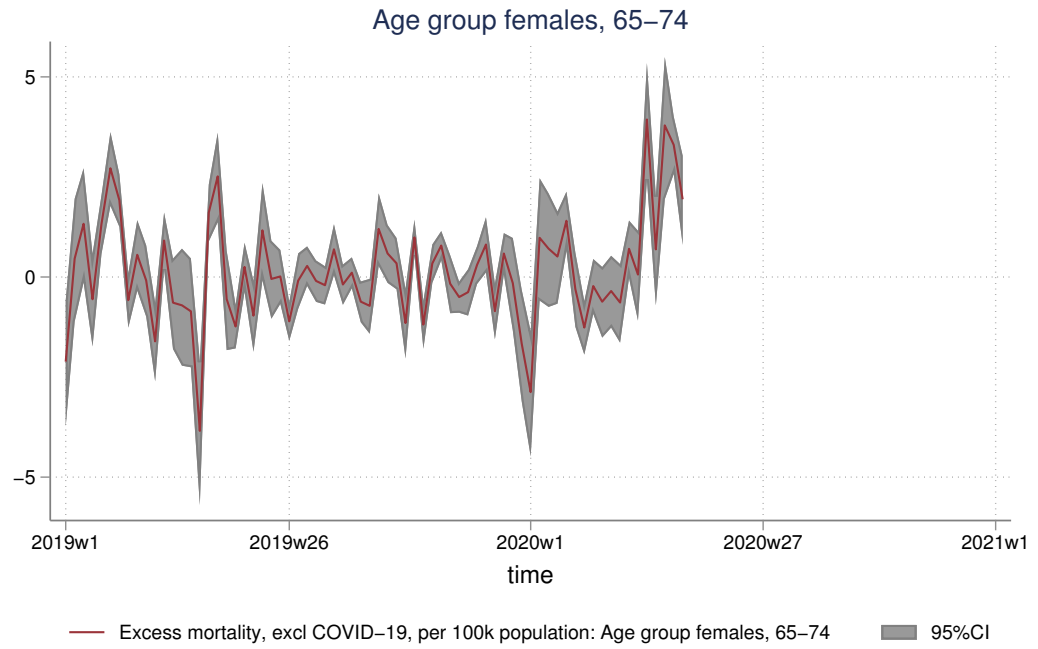

Figure 288: Females 65-74 all-cause excess deaths (-COVID19), fm 2020 wk1

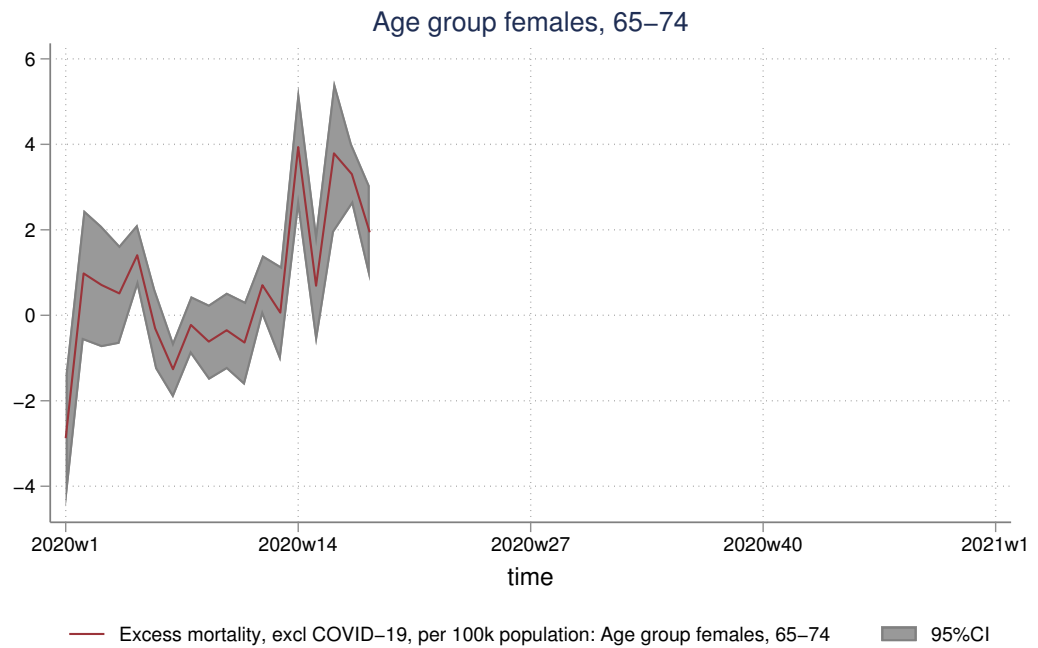

## 5.7 Females aged 75-84

Figure 289: Females 75-84 mortality time trend and model, fm 2010 wk1

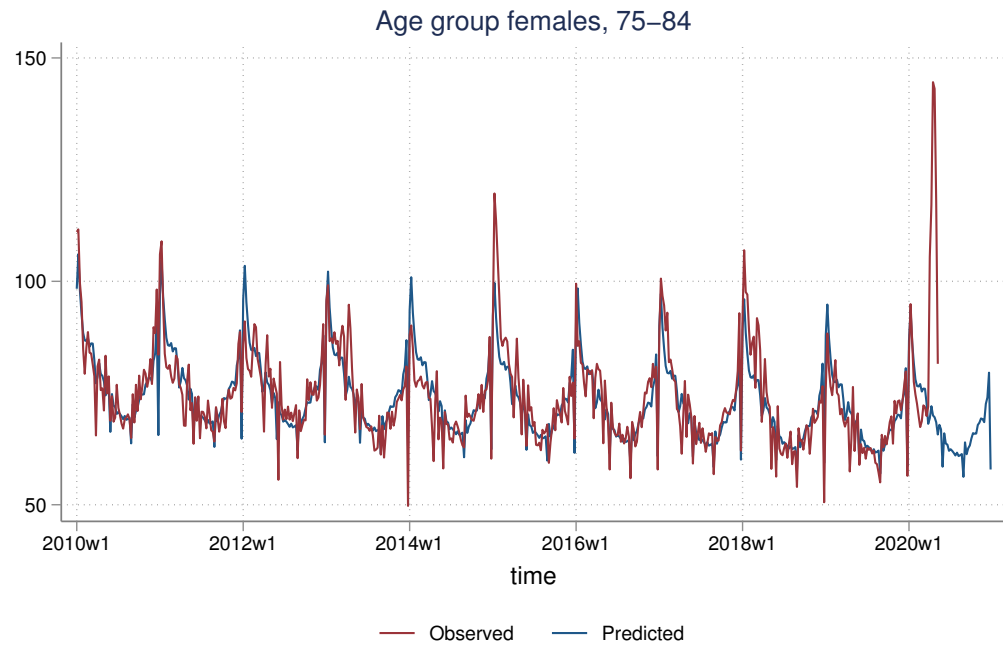

Figure 290: Females 75-84 mortality time trend and model, fm 2019 wk1

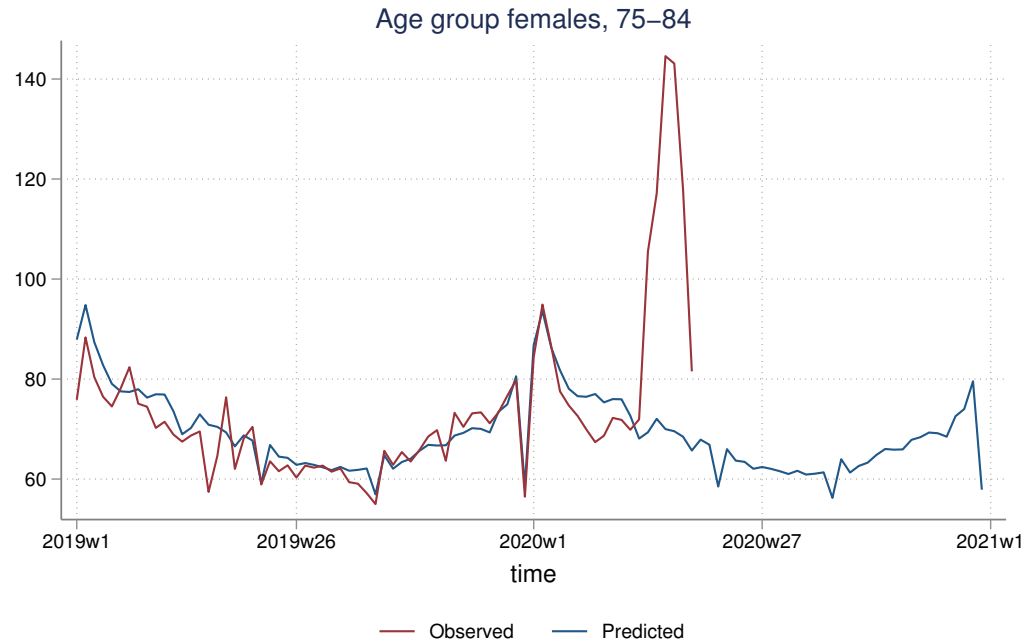

Figure 291: Females 75-84 mortality time trend and model, fm 2020 wk1

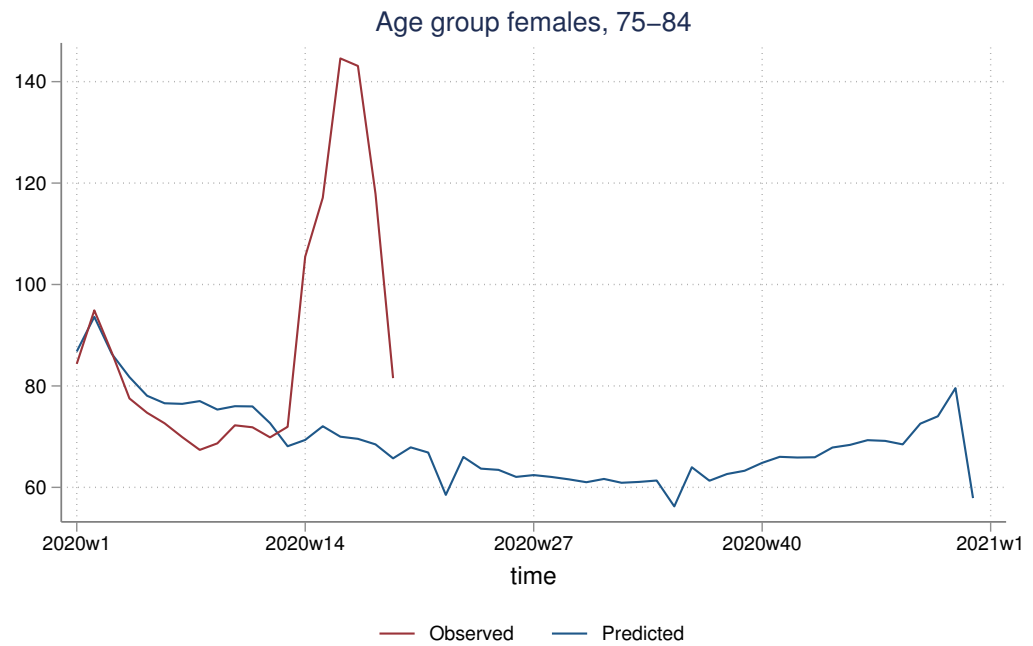

Figure 292: Females 75-84 all-cause excess deaths, fm 2010 wk1

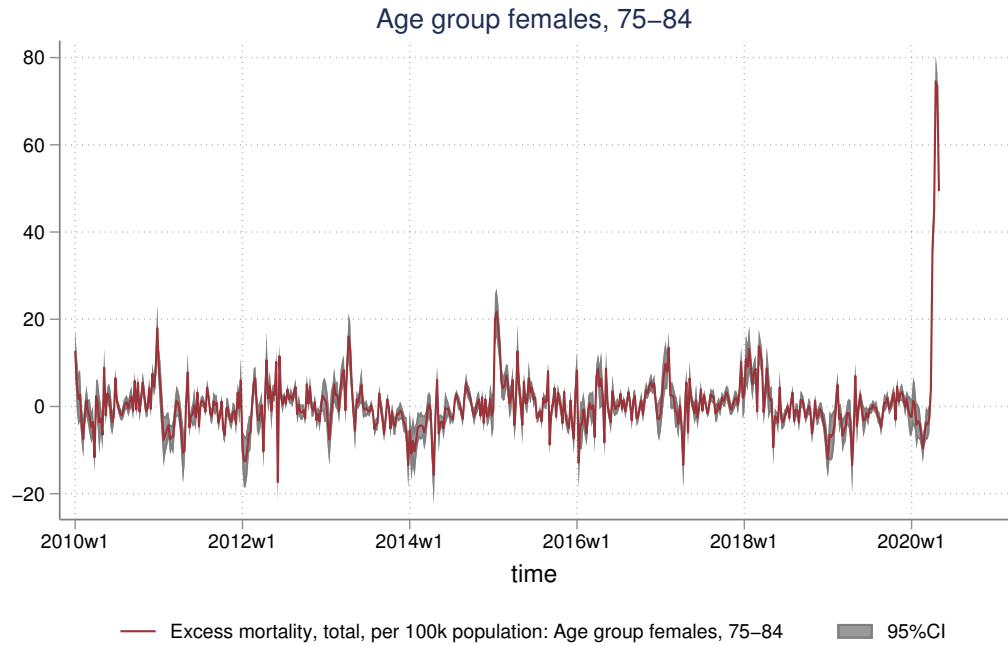

Figure 293: Females 75-84 all-cause excess deaths, fm 2019 wk1

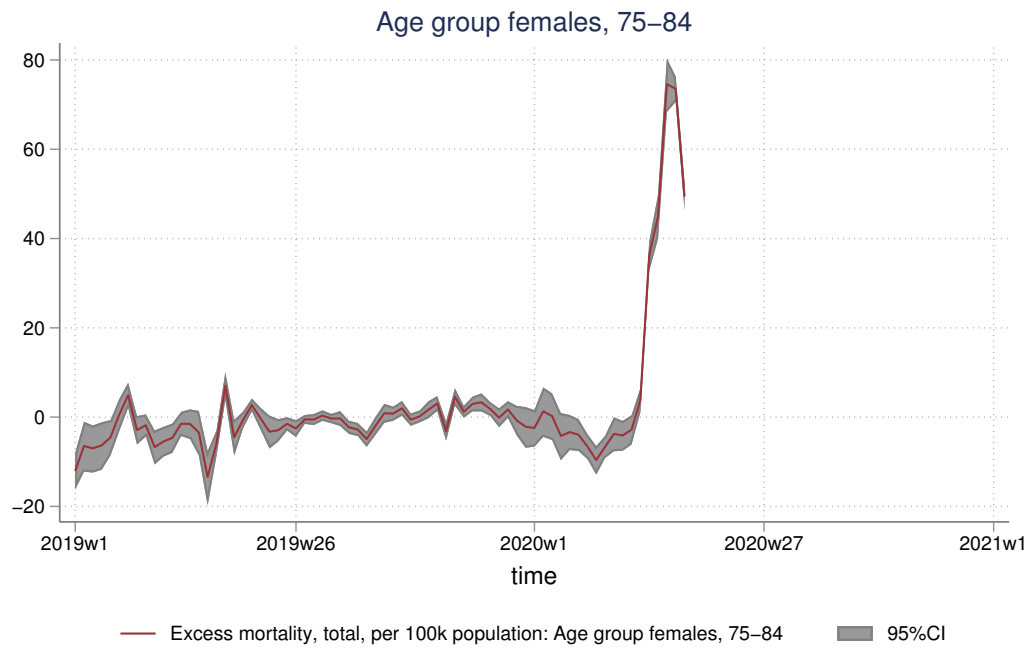

Figure 294: Females 75-84 all-cause excess deaths, fm 2020 wk1

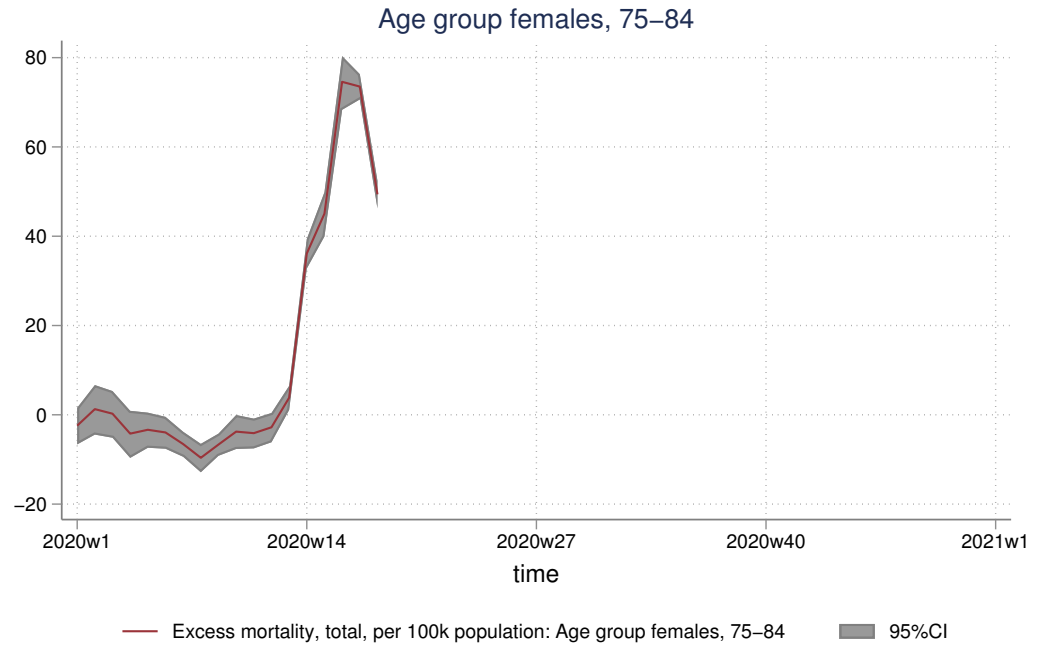

Figure 295: Females 75-84 all-cause excess deaths (-COVID19), fm 2010 wk1

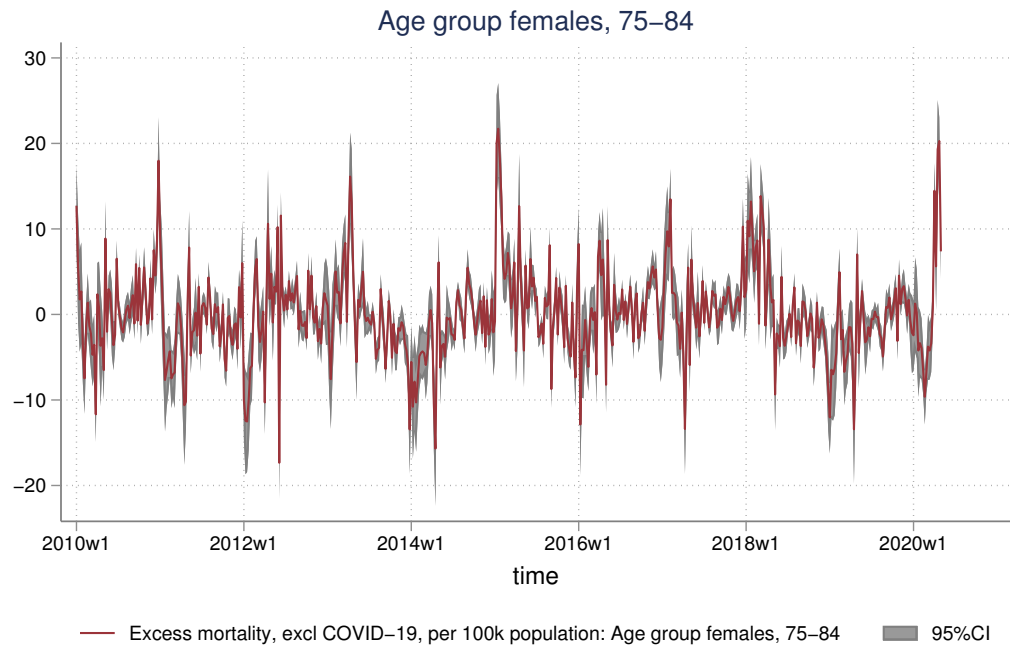

Figure 296: Females 75-84 all-cause excess deaths (-COVID19), fm 2019 wk1

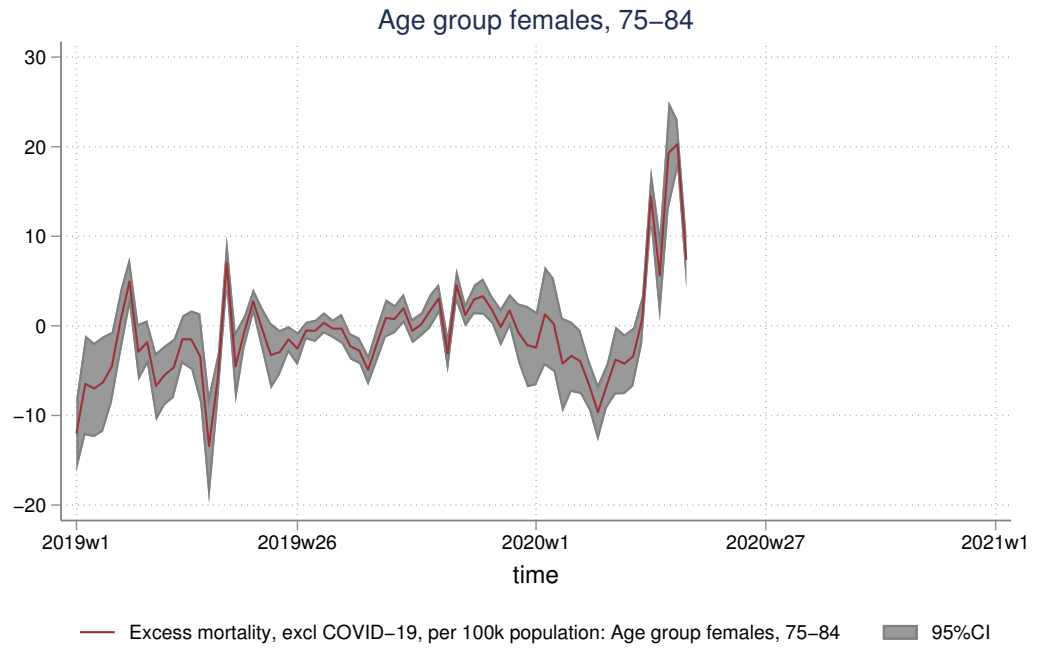

Figure 297: Females 75-84 all-cause excess deaths (-COVID19), fm 2020 wk1

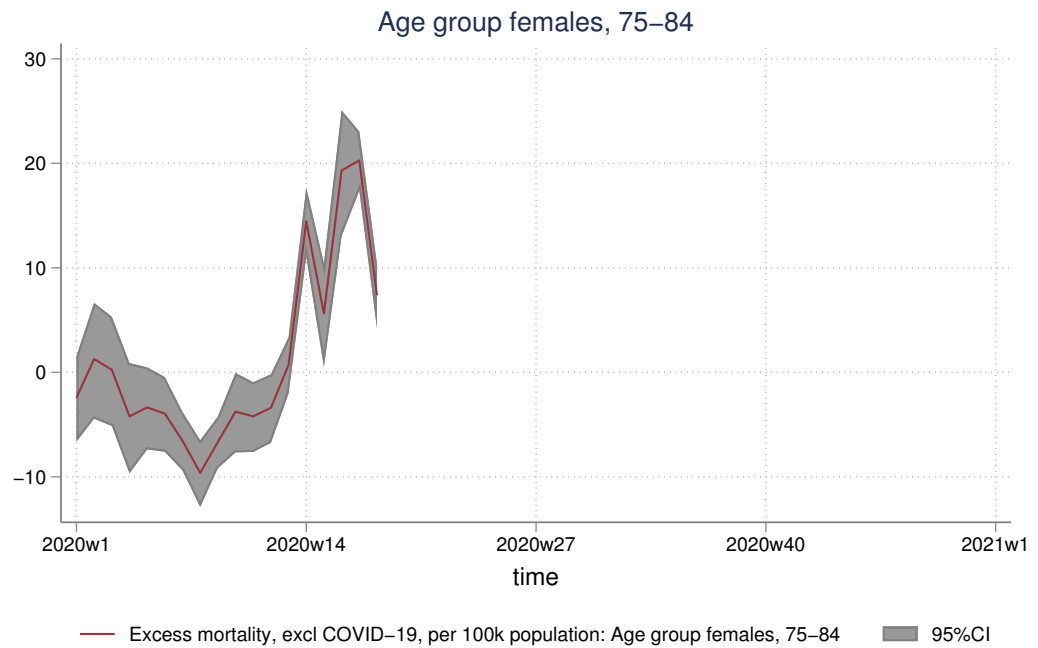

## 5.8 Females aged 85+

Figure 298: Females 85+ mortality time trend and model, fm 2010 wk1

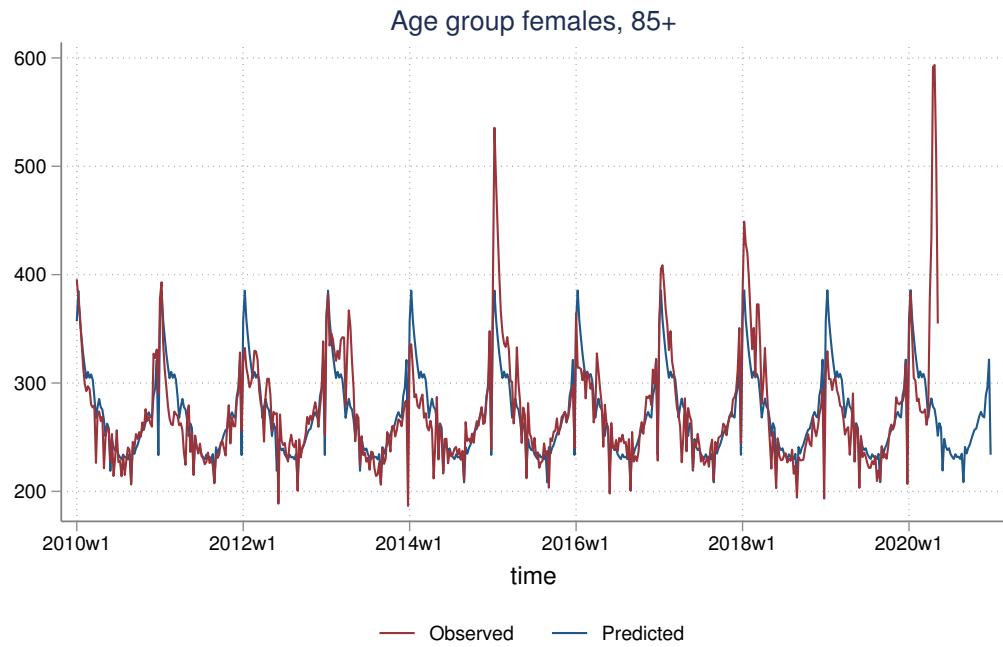

Figure 299: Females 85+ mortality time trend and model, fm 2019 wk1

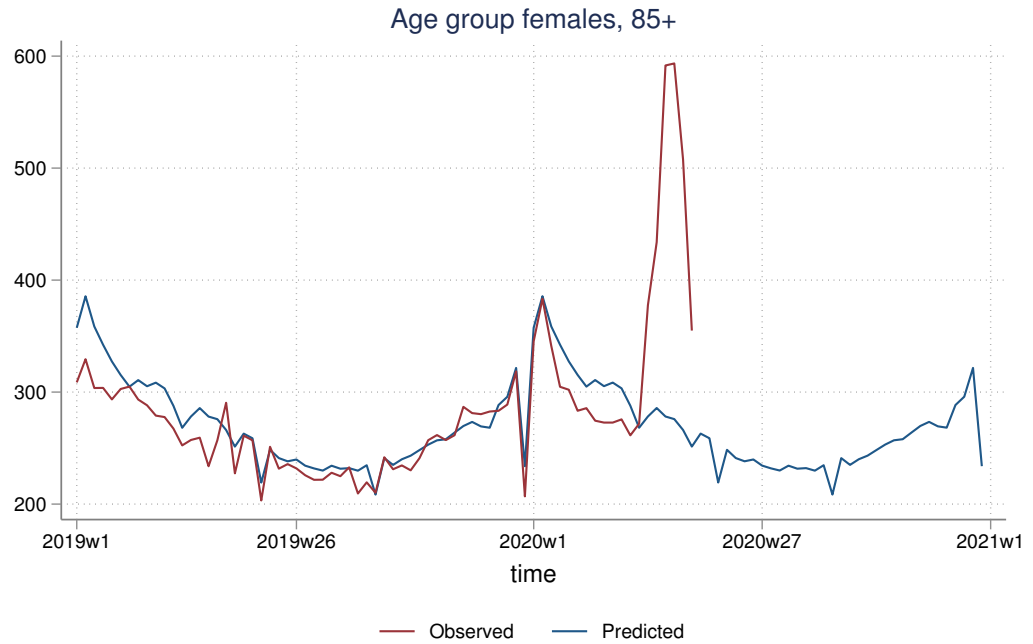

Figure 300: Females 85+ mortality time trend and model, fm 2020 wk1

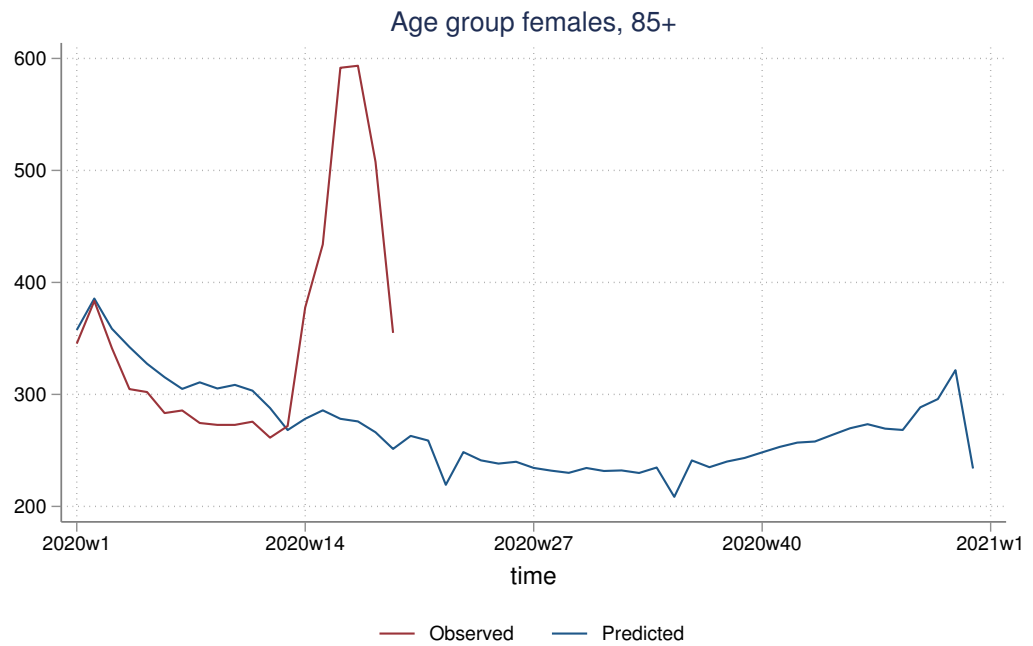



Figure 301: Females 85+ all-cause excess deaths, fm 2010 wk1

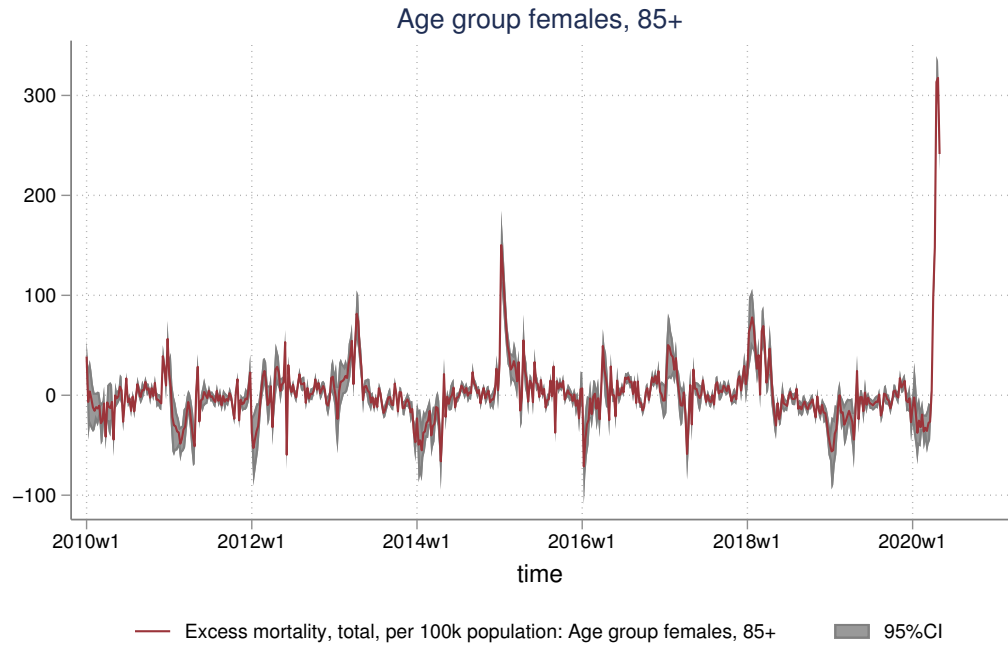

Figure 302: Females 85+ all-cause excess deaths, fm 2019 wk1

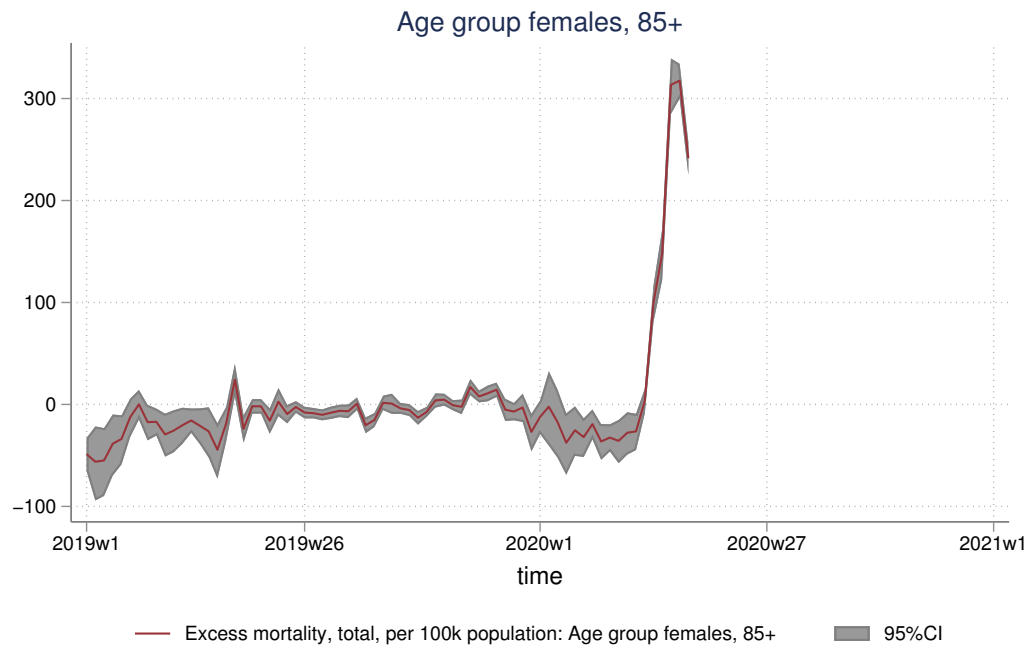

Figure 303: Females 85+ all-cause excess deaths, fm 2020 wk1

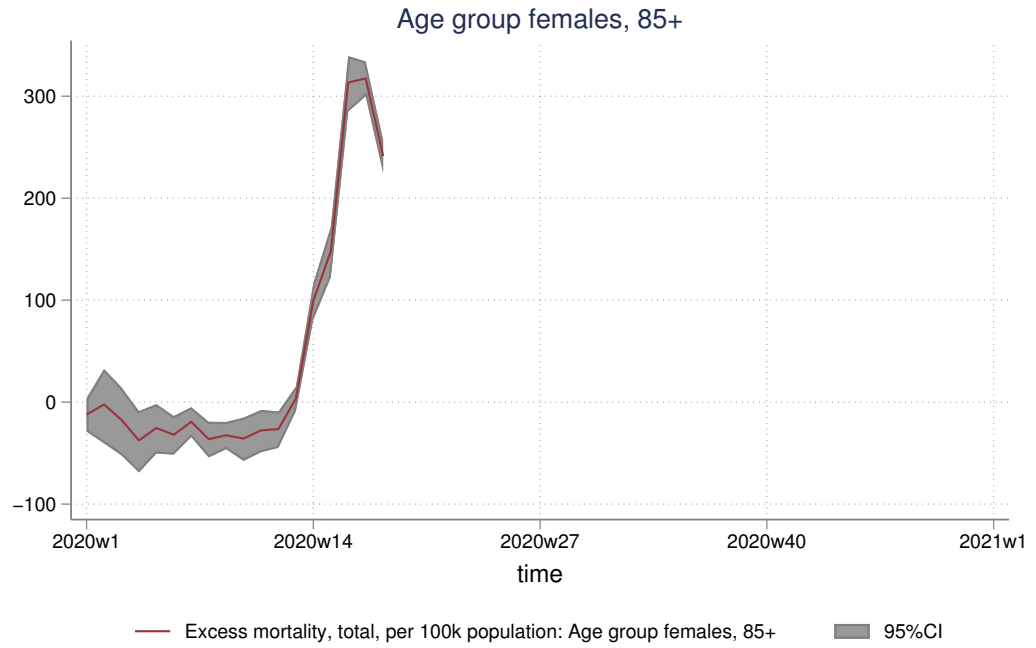

Figure 304: Females 85+ all-cause excess deaths (-COVID19), fm 2010 wk1

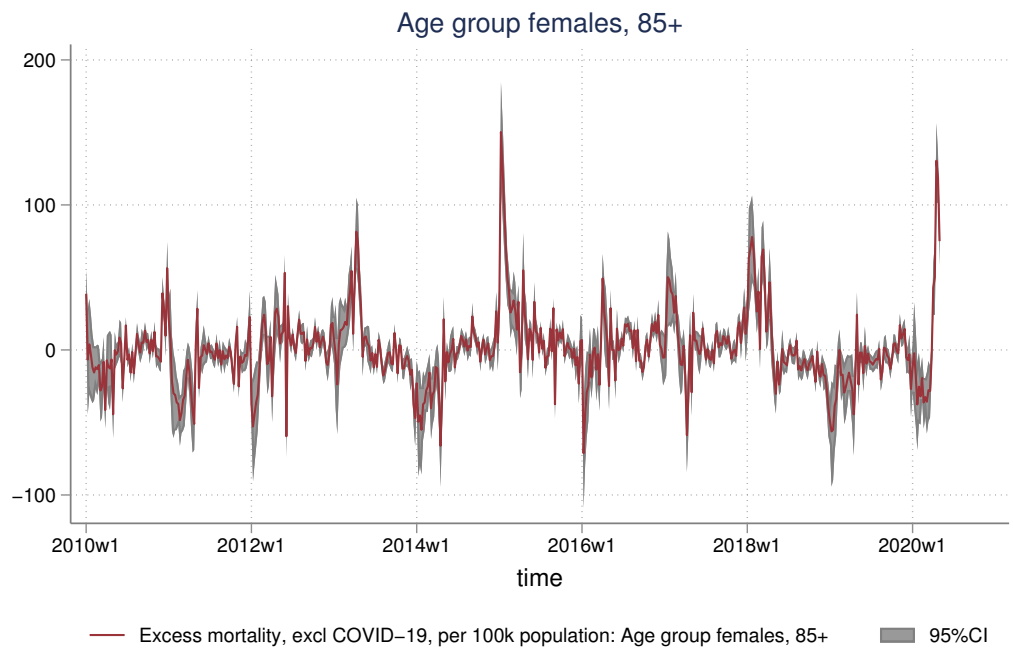

Figure 305: Females 85+ all-cause excess deaths (-COVID19), fm 2019 wk1

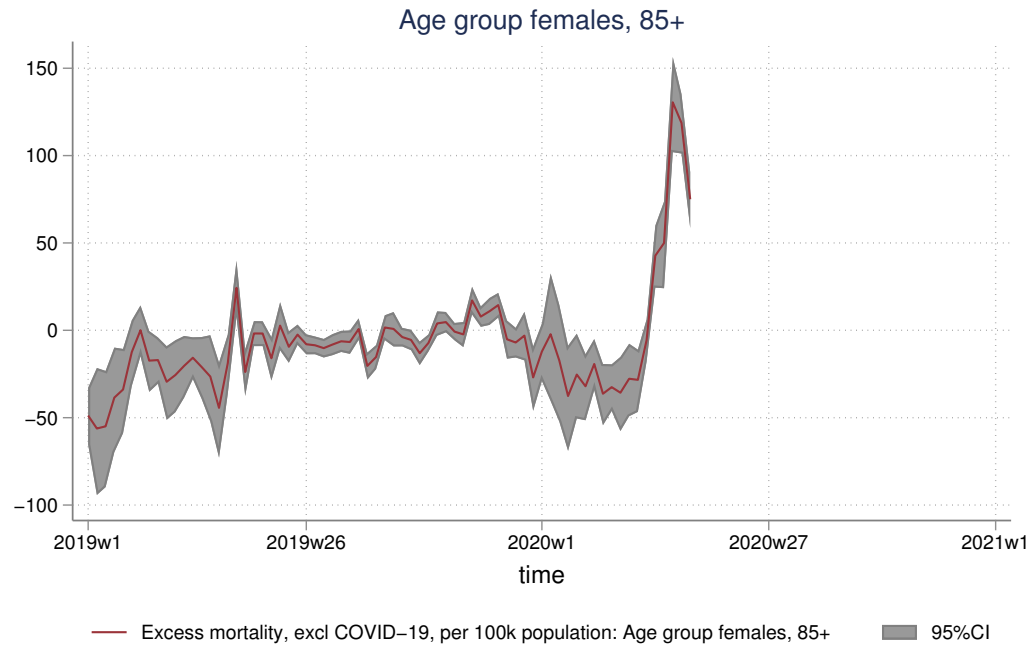

Figure 306: Females 85+ all-cause excess deaths (-COVID19), fm 2020 wk1

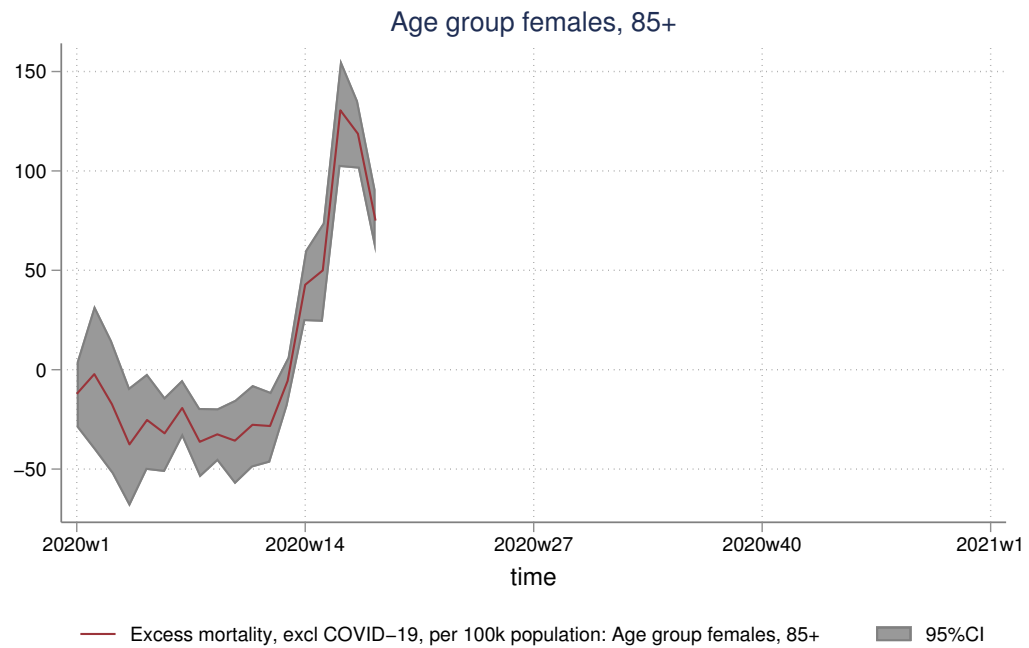

## References

ONS (2020), *User guide to mortality statistics*. Accessed: 2020-05-06.

**URL:** <https://www.ons.gov.uk/peoplepopulationandcommunity/birthsdeathsandmarriages/deaths/methodologies/userguidetomortalitystatisticsjuly2017>
